# Supplementary material for: The nuclear export inhibitor aminoratjadone is a potent effector in extracellular-targeted drug conjugates
Source: PubMed Central journal article supplement (PMC6540907; doi:10.1039/c8sc05542d), 2019-04-15

# The Nuclear Export Inhibitor Aminoratjadone is a Potent Effector in Extracellular-Targeted Drug Conjugates

Philipp Klahn\*,<sup>a,c</sup>, Verena Fetz<sup>a</sup>, Antje Ritter<sup>a</sup>, Wera Collisi<sup>a,b</sup>, Bettina Hinkelmann<sup>a</sup>, Tatjana Arnold<sup>a</sup>, Werner Tegge<sup>a</sup>, Katharina Rox<sup>a</sup>, Stephan Hüttel<sup>b</sup>, Kathrin I. Mohr<sup>b</sup>, Joachim Wink<sup>b</sup>, Marc Stadler<sup>b</sup>, Josef Wissing<sup>d</sup>, Lothar Jänsch<sup>d</sup>, Mark Brönstrup\*,<sup>a,e,f</sup>

<sup>a</sup> Department of Chemical Biology, Helmholtz Centre for Infection Research, Inhoffenstrasse 7, 38124 Braunschweig, Germany

<sup>b</sup> Department of Microbial Drugs, Helmholtz Centre for Infection Research, Inhoffenstrasse 7, 38124 Braunschweig, Germany

<sup>c</sup> Institute of Organic Chemistry, Technische Universität Braunschweig, Hagenring 30, 38106 Braunschweig, Germany

<sup>d</sup> Department of Structure and Function of Proteins; Research Group Cellular Proteomic, Helmholtz Centre for Infection Research, Inhoffenstrasse 7, 38124 Braunschweig, Germany

<sup>e</sup> Biomolecular Drug Research Center (BMWZ), Schneiderberg 38, 30167 Hannover, Germany

<sup>f</sup> German Centre of Infection Research (DZIF), Partner site Hannover-Braunschweig, Germany

## Content

|                                                                                             |     |
|---------------------------------------------------------------------------------------------|-----|
| Experimental details.....                                                                   | 2   |
| General Material and Equipment.....                                                         | 2   |
| Fermentation and isolation of Ratjadone A.....                                              | 4   |
| Synthesis of the compounds.....                                                             | 7   |
| Derivatization of Ratjadone A.....                                                          | 7   |
| Synthesis of appropriate carrier molecules.....                                             | 36  |
| Synthesis of imaging probes.....                                                            | 60  |
| Conjugation of Ratjadone derivatives to carrier molecules.....                              | 71  |
| Biological evaluation of the compounds.....                                                 | 110 |
| Cell proliferation assay.....                                                               | 110 |
| Cell proliferation assay under folate free conditions.....                                  | 112 |
| Monitoring export inhibitory activity.....                                                  | 114 |
| Analysis of cell labeling with fluorescein-labeled conjugates.....                          | 116 |
| Streptavidin-Pull-down with Ratjadone-biotin and identification of exportin by LC-MSMS..... | 118 |
| Plasma stability assay.....                                                                 | 121 |
| References.....                                                                             | 124 |
| Appendix.....                                                                               | 125 |
| <sup>1</sup> H-NMR spectra, <sup>13</sup> C-NMR spectra, IR spectra.....                    | 125 |

## Experimental details

### General Material and Equipment

Unless otherwise noted, all reagents were purchased from commercial suppliers and used without further purification. All solvents used for workup and purification were of HPLC grade. Moisture sensitive reactions were performed under argon atmosphere in dried glass ware. Reactions were monitored by TLC, LCMS or NMR.

**Flash chromatography** was done either manually using appropriate glass columns filled with silicagel (Merck, Silicagel 60, 1.15111.1000, 15-40  $\mu\text{m}$ ) or using the Reveleris<sup>®</sup> X2 flash chromatography system and prepacked cartridges (Reveleris<sup>®</sup> Flash Cartridges Silica 40 $\mu\text{m}$ ) from the company Büchi.

**Preparative reversed phase high pressure liquid chromatography (prep. HPLC RP)** was performed on a Phenomenex Gemini C18 RP-column 00G-4436-NO, 10  $\mu\text{m}$ , 110 A, 250 $\times$ 10.00 mm (5 mL/min) or a Phenomenex Gemini C18 RP-column 00G-4435-PO-AX, 5  $\mu\text{m}$ , 110 A, 250 $\times$ 21.20 mm (9 mL/min) or a Thermo Fisher Scientific BDS Hypersil C18 RP-column 28105-259370, 5  $\mu\text{m}$ , 250 $\times$ 30 mm, (25 mL/min) or a Macherey-Nagel Nucleosil 100-7 VP C18 RP column 715691-1116949, 250 $\times$ 40 mm (45 mL/min) using a Thermo Fisher Scientific Dionex Ultimate 3000 HPLC system. Eluents, gradients and additives are given in parentheses. Product containing fractions were combined diluted with dest. H<sub>2</sub>O (min. 1:1/solvent:H<sub>2</sub>O), frozen and lyophilized.

**Thin-layer chromatography (TLC)** was performed on pre-coated glass plates (Merck TLC Silicagel 60 F<sub>254</sub>, 1.15341.0001, 2.5 $\times$ 7.5 cm) and components were visualized by observation under UV light ( $\lambda = 254$  nm [UV<sup>254</sup>] or  $\lambda = 366$  nm [UV<sup>366</sup>]), treatment of developed plates in an iodine chamber or by treating the plates with TLC staining solutions (for preparation see list below) followed by heating. Eluent or eluent-mixtures used are reported in parentheses.

*KMnO<sub>4</sub> staining solution [KMnO<sub>4</sub>]*: 1.5 g KMnO<sub>4</sub>, 10 g K<sub>2</sub>CO<sub>3</sub>, and 1.25 mL 10% NaOH in 200 mL H<sub>2</sub>O.

*PMA staining solution [PMA]*: 10 g phosphomolybdic acid in 100 mL abs. EtOH.

*CAM staining solution [CAM]*: 1 g Ce(IV)(SO<sub>4</sub>)<sub>2</sub>, 2.5 g (NH<sub>4</sub>)<sub>6</sub>Mo<sub>4</sub>O<sub>7</sub> in 100 mL 10% H<sub>2</sub>SO<sub>4</sub>

*Anisaldehyd staining solution [AA]*: 135 mL abs. EtOH, 5 mL conc. H<sub>2</sub>SO<sub>4</sub>, 1.5 mL HOAc and 3.7 mL *p*-anisaldehyde.

*Ninhydrin staining solution [Ninhydrin]*: 1.5 g ninhydrin in 100 mL abs. EtOH and 3.0 mL HOAc.

*Vanillin staining solution [Van]*: 15 g vanillin in 250 mL abs. EtOH and 2.5 mL conc. H<sub>2</sub>SO<sub>4</sub>.

**Preparative thin-layer chromatography** was performed on pre-coated glass plates (Merck TLC Silicagel 60 F<sub>254</sub>, 1.05715.0001, 20x20 cm, max. 10-15 mg/plate and Analtech Uniplate Silica gel GF Z51305-9, 20x20 cm x 2 mm, max 100-150 mg/plate). Eluent or eluent-mixtures used and number of developments are reported in parentheses. Compounds were visualized by observation under UV light ( $\lambda = 254$  or 366 nm). Compound containing silica gel fractions were scratched from the plate with a scapell, crushed to small pieces and compounds were eluated by appropriate solvent mixtures.

**NMR** spectra were recorded on a Bruker Avance III or a Bruker Avance III HD with cryoprobe system. <sup>1</sup>H NMR spectra were recorded at 500 MHz and 700 MHz. <sup>13</sup>C NMR spectra were recorded at 126 MHz and 176 MHz. Samples of final conjugates were prepared in *Shigemi*-NMR tubes matched with DMSO-*d*<sub>6</sub>. Chemical shifts are reported in ppm relative to solvent signal. Multiplicity is indicated as follows: s (singlet); bs (broad singlet); d (doublet); t (triplet); q (quartet); m (multiplet); dd (doublet of doublets), etc.

**Optical rotation** values were determined on a Perkin-Elmer 241 MC and calculated along Lambert-Beer's equation.

**IR** spectra were recorded on a Bruker ALPHA FT IR spectrometer with ATR-technique. Only the wave numbers of observed absorption peaks are given.

**Low resolution mass spectrometry (LRMS)** data were recorded using an Agilent 1100 HPLC system equipped with DAD detector and an API 150 EX quadrupole mass detector with electron spray ionization (ESI) (ACN-H<sub>2</sub>O + 0.05% TFA) or a Dionex Ultimate 3000 HPLC system equipped with a DAD detector and a Bruker amazon ion trap mass detector with electron spray ionization (ESI).

**High resolution mass spectrometry (HRMS)** data were recorded using a Dionex Ultimate 3000 HPLC system equipped with a DAD detector and a Bruker maXis HD QTOF mass detector with electron spray ionization (ESI).

## Fermentation and isolation of Ratjadone A

**Isolation of Ratjadone A (1)** - (R)-6-((1E,3Z,5R,7E,9E,11R)-11-hydroxy-11-((2S,4R,5S,6S)-4-hydroxy-5-methyl-6-((E)-prop-1-en-1-yl)tetrahydro-2H-pyran-2-yl)-3,5,7-trimethylundeca-1,3,7,9-tetraen-1-yl)-5,6-dihydro-2H-pyran-2-one

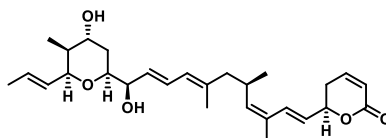

Chemical Formula: C<sub>28</sub>H<sub>40</sub>O<sub>5</sub>  
Molecular Weight: 456,62

Ratjadone A 1

Fermentation and isolation of Ratjadone A was done similar to the published procedures<sup>1-3</sup> with some changes mentioned below and utilizing an optimized strain or the myxobacterium *Sorangium cellulosum* (Soce 1047 = DSM 32464).

The producing organism, the myxobacterium *Sorangium cellulosum* Soce1047, was isolated at the Helmholtz Centre of Infection Research, former GBF in 1989 from a soil sample collected at Cala Ratjada (Mallorca, Spain). Seed cultures on yeast agar were inoculated into 250-mL Erlenmeyer flasks containing 100 mL of medium.

The basic medium for growth and production had the following composition (in g/L distilled water): soybean flour (defatted) 4, glucose monohydrate 2, potato starch 8; MgSO<sub>4</sub> 7 H<sub>2</sub>O 1; CaCl<sub>2</sub> 2 H<sub>2</sub>O 1; ethylenediaminetetraacetic acid iron(III)-sodium salt 0.008. The pH of the medium was adjusted to 7.3 with KOH before autoclaving. In both media Soce1047 grew in small lumps, so that growth could not be measured optically or by counting the cell numbers.

A 20-L bioreactor (Giovanola Freres, Monthey, Switzerland) with 6 L of the production medium was inoculated with 1 L of a 4-day old preculture grown in the same medium in 1-L Erlenmeyer flasks with 500 mL medium under shaking (160 rpm, 30°C). For continuous adsorption of the produced ratjadone, 100 mL of the adsorber resin XAD-16 (Rohm and Haas, Frankfurt/M) was added before autoclaving. To prevent foam formation, 10 mL silicone antifoam (Tegosipon, Goldschmidt AG Essen) was added. The fermentation was run for 7 days at 30°C and the pH adjusted to 7.3-7.5 (2.5% H<sub>2</sub>SO<sub>4</sub>/2.5% KOH) with an aeration rate of 300 Lair per hour and a stirrer speed of 300 rpm. Ratjadon was excreted into the culture broth during the growth phase and became quantitatively adsorbed to the resin the end of the fermentation.

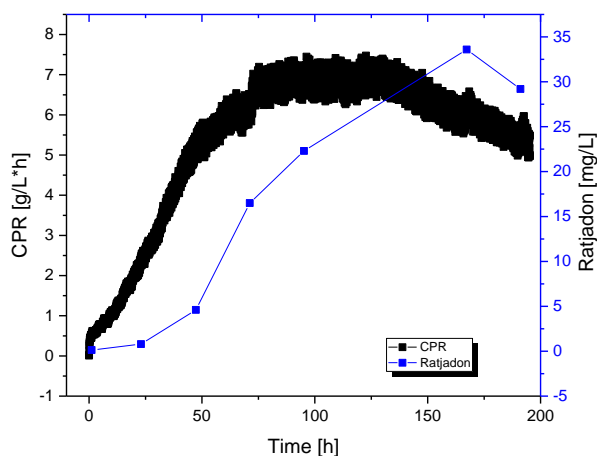

Product titer and CO<sub>2</sub> evolution rate (CPR) over time, product formation is observed during exponential growth phase.

The adsorber resin was separated from the broth by decantation off the cell mass in the counter-flow principle using 2 L of H<sub>2</sub>O. After decantation of the remaining water, the XAD-16 adsorber resin was extracted with 2 L of MeOH and the resulting eluent was concentrated under reduced pressure (40°C, 130 mBar). The residue was suspended in 500 mL of H<sub>2</sub>O and the mixture was extracted with EtOAc (3x 400 mL). The combined organic layers were dried over anhydrous Na<sub>2</sub>SO<sub>4</sub> and concentrated under reduced pressure yielding 1.38 g of raw material. This was further purified by automated flash chromatography through silicagel (Büchi Reveleris® X2, 24 g Büchi Reveleris® Silica Cartridge, flow: 28 mL/min, step gradient: PE:EtOAc/1:1 (5 min), then CH<sub>2</sub>Cl<sub>2</sub>:MeOH/1:0 (2 min), 99:1 (5 min), 98:2 (5 min), 95:5 (5 min), 9:1 (1 min)) yielding 324 mg (0.709 mmol, 32.4 mg/L of ferments) of Ratjadone A as a pale beige amorphous foam.

The fermentation was done on 10L and 70L scale. The best yield was obtained on 10L scale with 32.4 mg of Ratjadone A/L. A total amount of 3.646 g of Ratjadone A was isolated from 150 L Fermentation culture.



Fermentation



Ratjadone A 1 (Sorangium cellulosum)



Flash-Chromatography NP



Cell mass + XAD from fermenter



Decantation/flotation of cells with H<sub>2</sub>O



Extraction of XAD with MeOH



Partitioning between H<sub>2</sub>O/EtOAc,



Raw extracts

**Ratjadone A (1):** TLC (CH<sub>2</sub>Cl<sub>2</sub>:MeOH/95:5) R<sub>f</sub>: 0.35 [UV<sup>254</sup>, CAM], IR (ATR) [cm<sup>-1</sup>]: 3417, 2962, 2921, 2871, 1715, 1653, 1625, 1451, 1438, 1380, 1344, 1295, 1245, 1149, 1121, 1056, 1011, 963, 916, 881, 814, 732, 660. <sup>1</sup>H-NMR (500 MHz, CDCl<sub>3</sub>) δ [ppm]: 6.88 (ddd, *J* = 9.7, 4.6, 3.9 Hz, 1H), 6.70 (d, *J* = 15.6 Hz, 1H), 6.45 (ddd, *J* = 15.2, 10.9, 1.3 Hz, 1H), 6.09 – 5.99 (m, 1H), 5.76 (d, *J* = 11.0 Hz, 1H), 5.72 – 5.69 (m, 1H), 5.68 – 5.66 (m, 1H), 5.54 – 5.47 (m, 1H), 5.46 – 5.37 (m, 1H), 5.21 (d, *J* = 9.5 Hz, 1H), 5.03 – 4.93 (m, 1H), 4.44 (d, *J* = 6.2 Hz, 1H), 4.32 (dd, *J* = 6.0, 2.8 Hz, 1H), 3.98 (q, *J* = 2.8 Hz, 1H), 3.85 (dt, *J* = 12.2, 2.8 Hz, 1H), 2.79 (dq, *J* = 9.6, 6.9 Hz, 1H), 2.50 – 2.39 (m, 2H), 1.98 (d, *J* = 7.2 Hz, 2H), 1.86 (ddd, *J* = 14.9, 12.3, 2.9 Hz, 1H), 1.77 (d, *J* = 1.2 Hz, 3H), 1.70 (s, 6H), 1.70 – 1.68 (m, 2H), 1.65 – 1.58 (m, 2H), 1.43 – 1.34 (m, 1H), 0.90 (d, *J* = 6.6 Hz, 3H), 0.89 (d, *J* = 7.2 Hz, 3H). <sup>13</sup>C-NMR (126 MHz, CDCl<sub>3</sub>) δ [ppm]: 164.34, 144.95, 139.55, 137.70, 130.81, 130.37, 129.45, 128.61, 128.51, 127.10, 126.08, 125.52, 121.84, 78.84, 74.97, 74.91, 74.57, 70.42, 47.97, 39.82, 30.74, 30.26, 26.98, 21.20, 20.60, 18.16, 17.29, 11.34. LRMS (ESI-Quad) [m/z]: 479.2 [M+Na]<sup>+</sup>, 421.3 [M-H<sub>2</sub>O+H]<sup>+</sup>, HRMS (ESI-IT) [m/z]: 479.277556, calculated 479.276795 for C<sub>28</sub>H<sub>40</sub>NaO<sub>5</sub> [M+Na]<sup>+</sup>, err [ppm] 1.588.

## Synthesis of the compounds

### Derivatization of Ratjadone A

#### Synthesis of 16-Aminoratjadones

**Synthesis of 16-Oxoratjadone (13)** - (R)-6-((R,1E,3Z,7E,9E)-11-((2S,4R,5S,6S)-4-hydroxy-5-methyl-6-((E)-prop-1-en-1-yl)tetrahydro-2H-pyran-2-yl)-3,5,7-trimethyl-11-oxoundeca-1,3,7,9-tetraen-1-yl)-5,6-dihydro-2H-pyran-2-one, **19-Oxoratjadone (14)** - (R)-6-((1E,3Z,5R,7E,9E,11R)-11-hydroxy-3,5,7-trimethyl-11-((2S,5R,6S)-5-methyl-4-oxo-6-((E)-prop-1-en-1-yl)tetrahydro-2H-pyran-2-yl)undeca-1,3,7,9-tetraen-1-yl)-5,6-dihydro-2H-pyran-2-one and **16,19-Dioxoratjadone (15)** - (R)-6-((R,1E,3Z,7E,9E)-3,5,7-trimethyl-11-((2S,5R,6S)-5-methyl-4-oxo-6-((E)-prop-1-en-1-yl)tetrahydro-2H-pyran-2-yl)-11-oxoundeca-1,3,7,9-tetraen-1-yl)-5,6-dihydro-2H-pyran-2-one

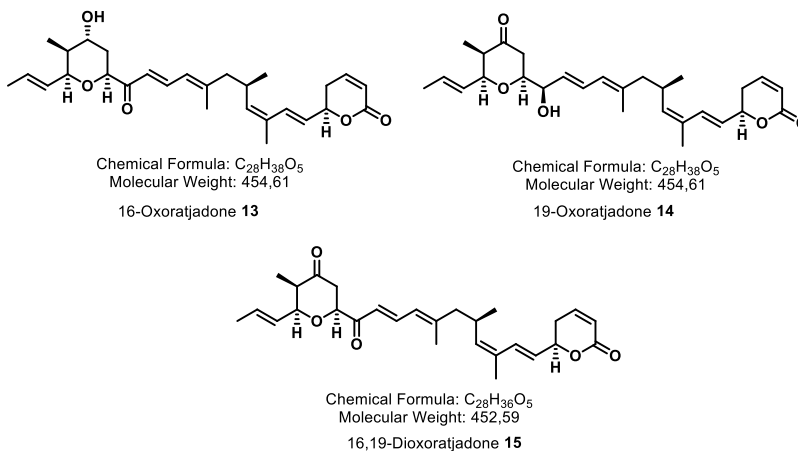

A solution of 33.7 mg (0.1205 mmol, 1.1 equiv) IBX<sup>i</sup> in 750  $\mu$ L DMSO was added dropwise over a period of 16 h (Syringe Pump) at 23°C to a stirred solution of 55 mg (0.1095 mmol, 1.0 equiv) of Ratjadone A **1** dissolved in 750  $\mu$ L DMSO. Afterwards the mixture was stirred for further 24 h at 23°C. The reaction was monitored by HPLC-MS. The mixture was diluted with CH<sub>2</sub>Cl<sub>2</sub> (15 mL) and stirred for 30 min until IBA precipitates as white solid and could be filtered off using a cellulose filter. The filtrate was washed with H<sub>2</sub>O (3x 15 mL)<sup>ii</sup>, dried over anhydrous Na<sub>2</sub>SO<sub>4</sub> and was concentrated under reduced pressure. The residue was purified by preparative thin-layer chromatography (CH<sub>2</sub>Cl<sub>2</sub>: MeOH/98:2, 2x Development), yielding 34.5 mg (0.076 mmol, 69%, 75% brsm) 16-oxoratjadone **13** as a pale-yellow solid foam, 3.7 mg (8.1  $\mu$ mol, 7%, 8% brsm) 19-oxoratjadone **14** as a pale-yellow solid foam, 6.9 mg (15.2  $\mu$ mol, 14%, 15% brsm) 16,19-

<sup>i</sup> IBX was freshly prepared from 2-iodobenzoic acid according to the procedure of *Santagostino* and co-workers.<sup>16</sup>

<sup>ii</sup> Important to get rid of DMSO traces, which have a strongly negative influence to the chromatographic separation of the products.

dioxoratjadone **15** as a pale-yellow solid foam and 4.0 mg (8%) reisolated ratjadone A **1**. The reaction was done in 10 - 600 mg scale, obtaining similar product distributions and yields.

**16-Oxoratjadone (13):** TLC (CH<sub>2</sub>Cl<sub>2</sub>:MeOH/98:2) R<sub>f</sub>: 0.26 [UV<sup>254</sup>, CAM], IR (ATR) [cm<sup>-1</sup>]: 3456, 2970, 2922, 2883, 1723, 1682, 1620, 1581, 1451, 1437, 1380, 1362, 1307, 1247, 1218, 1126, 1084, 1056, 1013, 968, 914, 884, 783, 732, 700. <sup>1</sup>H-NMR (700 MHz, CDCl<sub>3</sub>) δ [ppm]: 7.61 (dd, *J* = 15.1, 11.7 Hz, 1H), 6.88 (ddd, *J* = 9.8, 5.3, 3.1 Hz, 1H), 6.70 (d, *J* = 15.6 Hz, 1H), 6.50 (d, *J* = 15.2 Hz, 1H), 6.04 (ddd, *J* = 9.8, 2.3, 1.3 Hz, 1H), 5.99 (d, *J* = 11.7 Hz, 1H), 5.77 – 5.70 (m, 1H), 5.73 – 5.67 (m, 1H), 5.50 (ddq, *J* = 15.4, 6.1, 1.6 Hz, 1H), 5.19 (d, *J* = 9.6 Hz, 1H), 5.00 (dddd, *J* = 10.2, 6.3, 5.2, 1.1 Hz, 1H), 4.47 – 4.45 (m, 1H), 4.43 (dd, *J* = 11.1, 3.7 Hz, 1H), 4.01 (q, *J* = 2.7 Hz, 1H), 2.86 (ddq, *J* = 13.8, 9.7, 6.8 Hz, 1H), 2.51 – 2.39 (m, 2H), 2.10 (dd, *J* = 7.1, 2.2 Hz, 2H), 1.85 (d, *J* = 1.1 Hz, 3H), 1.78-1.73 (m, 2H), 1.77 (d, *J* = 1.2 Hz, 3H), 1.71 (dt, *J* = 6.5, 1.3 Hz, 3H), 1.68 (dtt, *J* = 6.7, 2.7, 1.5 Hz, 1H), 0.93 (d, *J* = 0.8 Hz, 3H), 0.92 (d, *J* = 1.5 Hz, 3H). <sup>13</sup>C-NMR (176 MHz, CDCl<sub>3</sub>) δ [ppm]: 199.85, 164.29, 150.49, 144.94, 140.32, 138.65, 130.24, 130.13, 129.89, 127.14, 126.05, 125.99, 122.96, 121.84, 78.54, 75.09, 70.23, 48.47, 39.30, 30.87, 30.76, 30.23, 29.92, 21.26, 20.60, 18.17, 18.13, 11.44. LRMS (ESI-Quad) [m/z]: 477.6 [M+Na]<sup>+</sup>, 455.2 [M-H<sub>2</sub>O+H]<sup>+</sup>, HRMS (ESI-IT) [m/z]: 455.279347, calculated 455.279201 for C<sub>28</sub>H<sub>39</sub>O<sub>5</sub> [M+H]<sup>+</sup>, err [ppm] - 0.321.

**19-Oxoratjadone (14):** TLC (CH<sub>2</sub>Cl<sub>2</sub>:MeOH/98:2) R<sub>f</sub>: 0.36 [UV<sup>254</sup>, CAM], IR (ATR) [cm<sup>-1</sup>]: 3450, 2970, 2923, 2857, 1713, 1653, 1452, 1419, 1380, 1353, 1302, 1245, 1140, 1093, 1030, 1014, 967, 915, 882, 815, 732, 653. <sup>1</sup>H-NMR (500 MHz, CDCl<sub>3</sub>) δ [ppm]: 6.90 (dt, *J* = 9.8, 4.2 Hz, 1H), 6.71 (d, *J* = 15.6 Hz, 1H), 6.50 (ddd, *J* = 15.2, 11.0, 1.3 Hz, 1H), 6.07 (dt, *J* = 9.8, 1.8 Hz, 1H), 5.82 – 5.74 (m, 2H), 5.71 (dd, *J* = 15.6, 6.9 Hz, 1H), 5.54 – 5.41 (m, 2H), 5.23 (d, *J* = 9.6 Hz, 1H), 5.04 – 4.95 (m, 1H), 4.46 (s, 1H), 4.19 (ddt, *J* = 6.1, 2.6, 1.1 Hz, 1H), 3.74 (dt, *J* = 11.8, 3.0 Hz, 1H), 2.85 – 2.76 (m, 1H), 2.75 (dd, *J* = 14.9, 11.9 Hz, 1H), 2.48 (ddd, *J* = 6.7, 3.8, 1.9 Hz, 2H), 2.39 (qdd, *J* = 7.0, 2.5, 1.1 Hz, 1H), 2.16 (ddd, *J* = 14.9, 2.9, 1.3 Hz, 1H), 2.02 (d, *J* = 7.2 Hz, 2H), 1.80 (d, *J* = 1.2 Hz, 3H), 1.75 (ddd, *J* = 6.5, 1.6, 1.0 Hz, 3H), 1.73 (d, *J* = 1.1 Hz, 3H), 1.13 (d, *J* = 7.2 Hz, 3H), 0.93 (d, *J* = 6.6 Hz, 3H). <sup>13</sup>C-NMR (126 MHz, CDCl<sub>3</sub>) δ [ppm]: 211.63, 164.07, 144.67, 139.22, 138.44, 130.73, 129.41, 129.36, 128.84, 127.42, 127.00, 125.67, 125.39, 121.70, 79.58, 79.33, 78.72, 73.88, 50.12, 47.86, 37.51, 30.52, 30.09, 21.03, 20.42, 17.94, 17.06, 11.13. LRMS (ESI-Quad) [m/z]: 477.3 [M+Na]<sup>+</sup>, 455.4 [M+H]<sup>+</sup>, HRMS (ESI-IT) [m/z]: 477.261253, calculated 477.261145 for C<sub>28</sub>H<sub>38</sub>NaO<sub>5</sub> [M+Na]<sup>+</sup>, err [ppm] - 0.225.

**16,19-Dioxoratjadone (15):** TLC (CH<sub>2</sub>Cl<sub>2</sub>:MeOH/98:2) R<sub>f</sub>: 0.44 [UV<sup>254</sup>, CAM], IR (ATR) [cm<sup>-1</sup>]: 2968, 2923, 2855, 1717, 1684, 1620, 1582, 1451, 1419, 1381, 1333, 1305, 1245, 1186, 1148, 1100, 1059, 1013, 968, 932, 915, 883, 862, 814, 787, 732, 662. <sup>1</sup>H-NMR (500 MHz, CDCl<sub>3</sub>) δ [ppm]: 7.68 (dd, *J* = 15.1, 11.7 Hz, 1H),



6.89 (ddd,  $J = 9.7, 5.2, 3.2$  Hz, 1H), 6.72 (d,  $J = 15.6$  Hz, 1H), 6.55 (d,  $J = 15.1$  Hz, 1H), 6.09 – 6.01 (m, 2H), 5.86 – 5.77 (m, 1H), 5.72 (dd,  $J = 15.6, 6.3$  Hz, 1H), 5.52 (ddd,  $J = 15.4, 6.0, 1.7$  Hz, 1H), 5.22 (d,  $J = 9.6$  Hz, 1H), 5.06 – 4.97 (m, 1H), 4.27 – 4.22 (m, 2H), 2.88 (dtd,  $J = 13.7, 6.9, 3.3$  Hz, 1H), 2.66 (dd,  $J = 15.0, 12.0$  Hz, 1H), 2.52 – 2.40 (m, 4H), 2.14 (d,  $J = 7.3$  Hz, 2H), 1.91 – 1.87 (m, 3H), 1.79 (d,  $J = 1.1$  Hz, 3H), 1.76 (dt,  $J = 6.4, 1.2$  Hz, 3H), 1.15 (d,  $J = 7.2$  Hz, 3H), 0.95 (d,  $J = 6.6$  Hz, 3H). <sup>13</sup>C-NMR (126 MHz, CDCl<sub>3</sub>)  $\delta$  [ppm]: 209.87, 196.26, 164.03, 151.67, 144.70, 141.39, 138.36, 129.95, 129.09, 127.30, 126.07, 125.98, 122.31, 121.82, 84.92, 80.42, 80.20, 78.31, 50.21, 48.60, 39.92, 30.70, 30.19, 21.13, 20.52, 18.07, 18.00, 11.34. **LRMS** (ESI-Quad) [m/z]: 475.2 [M+Na]<sup>+</sup>, 453.3 [M+H]<sup>+</sup>, **HRMS** (ESI-IT) [m/z]: 453.263800, calculated 47453.263600 for C<sub>28</sub>H<sub>37</sub>O<sub>5</sub> [M+H]<sup>+</sup>, err [ppm] - 0.7.

**Synthesis of 16R-Aminoratjadone (16)** - (R)-6-((1E,3Z,5R,7E,9E,11R)-11-amino-11-((2S,4R,5S,6S)-4-hydroxy-5-methyl-6-((E)-prop-1-en-1-yl)tetrahydro-2H-pyran-2-yl)-3,5,7-trimethylundeca-1,3,7,9-tetraen-1-yl)-5,6-dihydro-2H-pyran-2-one, **16S-Aminoratjadone (17)** - (R)-6-((1E,3Z,5R,7E,9E,11S)-11-amino-11-((2S,4R,5S,6S)-4-hydroxy-5-methyl-6-((E)-prop-1-en-1-yl)tetrahydro-2H-pyran-2-yl)-3,5,7-trimethylundeca-1,3,7,9-tetraen-1-yl)-5,6-dihydro-2H-pyran-2-one, **Compound 18** - methyl (5R,6E,8Z,10R,12E,14E,16R)-3,16-diamino-5-hydroxy-16-((2S,4R,5S,6S)-4-hydroxy-5-methyl-6-((E)-prop-1-en-1-yl)tetrahydro-2H-pyran-2-yl)-8,10,12-trimethylhexadeca-6,8,12,14-tetraenoate and **Compound 19** - methyl (5R,6E,8Z,10R,12E,14E,16S)-3,16-diamino-5-hydroxy-16-((2S,4R,5S,6S)-4-hydroxy-5-methyl-6-((E)-prop-1-en-1-yl)tetrahydro-2H-pyran-2-yl)-8,10,12-trimethylhexadeca-6,8,12,14-tetraenoate

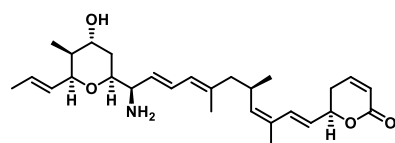

Chemical Formula: C<sub>28</sub>H<sub>41</sub>NO<sub>4</sub>  
Molecular Weight: 455.64  
16R-Aminoratjadone **16**

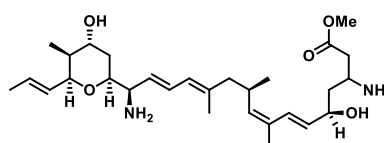

Chemical Formula: C<sub>29</sub>H<sub>48</sub>N<sub>2</sub>O<sub>5</sub>  
Molecular Weight: 504.71  
**18**

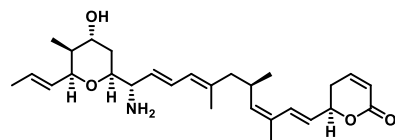

Chemical Formula: C<sub>28</sub>H<sub>41</sub>NO<sub>4</sub>  
Molecular Weight: 455.64  
16S-Amino Ratjadone **17**

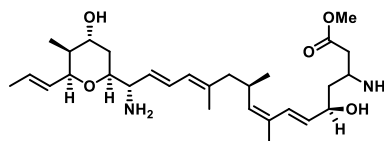

Chemical Formula: C<sub>29</sub>H<sub>48</sub>N<sub>2</sub>O<sub>5</sub>  
Molecular Weight: 504.71  
**19**

36.6 mg (0.475 mmol, 10 equiv) ammonium acetate were added to a solution of 21.6 mg (47.5  $\mu$ mol, 1.0 equiv) 16-Oxoratjadone **13** in 950  $\mu$ L dry MeOH at 23°C and stirred for 3 min, before 5.9 mg (95.0  $\mu$ mol, 2.0 equiv) sodium cyanoborohydride was added and the mixture was stirred at 23°C for 14 h. Then the mixture was heated for 2 h to 40°C, before the reaction was quenched by addition of 400  $\mu$ L of ACN:H<sub>2</sub>O + TFA/30:70 + 0.05%. This mixture was directly purified by RP prep HPLC (Phenomenex Gemini C18 RP-

column 00G-4435-PO-AX, 5  $\mu\text{m}$ , 110 A, 250 $\times$ 21.20 mm, Flow: 9 mL/min, ACN:H<sub>2</sub>O + TFA/ 10:90 + 0.1%  $\rightarrow$  95:5 + 0.1% in 90 min) yielding after lyophilization 6.9 mg (15.1  $\mu\text{mol}$ , 32%, 34% brsm) 16R-aminoratjadone **16** as a pale-yellow solid foam, 4.3 mg (9.4  $\mu\text{mol}$ , 20%, 21% brsm) 16S-aminoratjadone **17** as a pale-yellow solid foam, 1.5 mg (3.3  $\mu\text{mol}$ , 7%, 8% brsm) of Compound **18** as a yellow solid foam, 0.4 mg (0.9  $\mu\text{mol}$ , 2%, 2.4% brsm) of Compound **19** as a yellow solid foam and 1.6 mg (7%) of reisolated 16-oxoratjadone **13**. The compounds **16** and **17** were obtained as pure compounds, whereas compounds **18** and **19** were obtained as their TFA salts. The reaction was done in 10 - 100 mg scale, obtaining similar product distributions and yields.

**16R-Aminoratjadone (16):** IR (ATR) [ $\text{cm}^{-1}$ ]: 3403, 2961, 2923, 1674, 1522, 1452, 1436, 1382, 1345, 1253, 1201, 1160, 1134, 1058, 1014, 967, 918, 883, 816, 800, 722, 661. **<sup>1</sup>H-NMR** (500 MHz, CDCl<sub>3</sub>)  $\delta$  [ppm]: 8.05 (s, 2H), 6.92 (dt,  $J = 9.7, 4.2$  Hz, 1H), 6.64 (dd,  $J = 24.0, 15.5$  Hz, 1H), 6.51 (dd,  $J = 15.1, 10.9$  Hz, 1H), 6.03 (dt,  $J = 9.8, 1.7$  Hz, 1H), 5.72 (d,  $J = 10.7$  Hz, 1H), 5.70 – 5.61 (m, 2H), 5.58 (dd,  $J = 15.2, 9.2$  Hz, 1H), 5.36 (ddt,  $J = 15.5, 3.9, 1.6$  Hz, 1H), 5.20 (d,  $J = 9.5$  Hz, 1H), 5.02 – 4.90 (m, 1H), 4.38 (d,  $J = 5.1$  Hz, 1H), 4.17 (d,  $J = 12.2$  Hz, 1H), 3.96 – 3.91 (m, 1H), 3.80 (d,  $J = 9.0$  Hz, 1H), 2.78 (dt,  $J = 15.2, 8.3$  Hz, 1H), 2.48 (ddd,  $J = 7.2, 3.8, 1.6$  Hz, 2H), 2.00 (ddt,  $J = 22.4, 14.1, 6.7$  Hz, 2H), 1.81 – 1.76 (m, 3H), 1.72 (s, 3H), 1.66 (d,  $J = 6.4$  Hz, 3H), 1.69 – 1.53 (m, 2H), 1.40 (d,  $J = 14.0$  Hz, 1H), 0.96 (d,  $J = 6.6$  Hz, 3H), 0.81 (d,  $J = 7.1$  Hz, 3H). **<sup>13</sup>C-NMR** (126 MHz, CDCl<sub>3</sub>)  $\delta$  [ppm]: 164.94, 145.51, 140.31, 139.44, 134.67, 132.19, 129.79, 129.66, 126.71, 125.03, 124.99, 121.45, 120.81, 79.55, 74.77, 71.57, 69.49, 57.54, 47.51, 38.93, 30.57, 30.06, 28.99, 21.55, 20.41, 17.99, 17.48, 11.13. **LRMS** (ESI-Quad) [ $m/z$ ]: 456.3 [M+H]<sup>+</sup>, **HRMS** (ESI-IT) [ $m/z$ ]: 456.311233, calculated 456.310835 for C<sub>28</sub>H<sub>42</sub>NO<sub>4</sub> [M+H]<sup>+</sup>, err [ppm] – 0.872.

**16S-Aminoratjadone (17):** IR (ATR) [ $\text{cm}^{-1}$ ]: 3342, 2956, 2925, 1675, 1522, 1436, 1382, 1305, 1254, 1202, 1180, 1136, 1056, 1017, 966, 912, 883, 800, 722, 651. **<sup>1</sup>H-NMR** (500 MHz, CDCl<sub>3</sub>)  $\delta$  [ppm]: 8.07 (s, 2H), 6.98 – 6.87 (m, 1H), 6.69 (d,  $J = 15.5$  Hz, 1H), 6.56 (dd,  $J = 15.0, 10.9$  Hz, 1H), 6.04 (d,  $J = 9.8$  Hz, 1H), 5.75 (d,  $J = 10.8$  Hz, 1H), 5.68 (dd,  $J = 15.5, 7.7$  Hz, 1H), 5.70 – 5.60 (m, 1H), 5.45 – 5.34 (m, 2H), 5.20 (d,  $J = 9.9$  Hz, 1H), 5.02 – 4.91 (m, 1H), 4.41 (d,  $J = 5.5$  Hz, 1H), 4.04 – 3.91 (m, 2H), 3.81 (s, 1H), 3.64 (t,  $J = 9.0$  Hz, 1H), 2.80 (dh,  $J = 13.0, 6.3$  Hz, 1H), 2.56 – 2.43 (m, 2H), 2.10 (dd,  $J = 13.8, 5.6$  Hz, 1H), 1.90 (dd,  $J = 13.8, 8.7$  Hz, 1H), 1.78 (s, 3H), 1.69 (s, 3H), 1.68 (d,  $J = 6.5$  Hz, 3H), 1.67 – 1.64 (m, 1H), 1.57 (d,  $J = 14.0$  Hz, 1H), 1.49 (t,  $J = 11.8$  Hz, 1H), 0.96 (d,  $J = 6.5$  Hz, 3H), 0.86 (d,  $J = 7.1$  Hz, 3H). **<sup>13</sup>C-NMR** (126MHz, CDCl<sub>3</sub>)  $\delta$  [ppm]: 165.16, 145.67, 141.69, 139.23, 135.04, 132.47, 129.78, 129.55, 127.42, 124.94, 124.78, 121.42, 120.45, 79.55, 75.20, 71.61, 69.48, 59.36, 47.40, 39.25, 31.49, 30.22, 29.95, 21.44, 20.44, 18.07, 17.99, 11.16. **LRMS** (ESI-Quad) [ $m/z$ ]: 456.3 [M+H]<sup>+</sup>, **HRMS** (ESI-IT) [ $m/z$ ]: 456.310562, calculated 456.310835 for C<sub>28</sub>H<sub>42</sub>NO<sub>4</sub> [M+H]<sup>+</sup>, err [ppm] 0.598.

**Compound 18:**  $^1\text{H-NMR}$  (500 MHz,  $\text{CDCl}_3$ )  $\delta$  [ppm]: 8.35 – 8.08 (m, 2H), 7.96 – 7.72 (m, 2H), 6.55 (dd,  $J = 15.0, 11.2$  Hz, 1H), 6.21 (d,  $J = 15.3$  Hz, 1H), 5.67 (dd,  $J = 15.3, 6.6$  Hz, 1H), 5.57 (d,  $J = 11.0$  Hz, 1H), 5.46 (ddd,  $J = 23.5, 15.2, 8.4$  Hz, 2H), 5.38 (dd,  $J = 15.4, 4.5$  Hz, 1H), 5.05 (d,  $J = 9.5$  Hz, 1H), 4.38 (d,  $J = 4.6$  Hz, 1H), 4.26 (t,  $J = 10.0$  Hz, 1H), 4.12 (d,  $J = 11.0$  Hz, 1H), 3.95 (s, 1H), 3.77 (s, 2H), 3.71 (s, 3H), 2.87 – 2.78 (m, 1H), 2.69 (dd,  $J = 17.5, 5.0$  Hz, 1H), 2.67 – 2.57 (m, 2H), 2.04 (d,  $J = 11.6$  Hz, 1H), 2.02 – 1.93 (m, 1H), 1.87 – 1.79 (m, 1H), 1.78 (s, 3H), 1.74 (s, 3H), 1.69 (d,  $J = 6.1$  Hz, 3H), 1.73 – 1.60 (m, 2H), 1.41 (s, 1H), 1.04 (d,  $J = 6.5$  Hz, 3H), 0.83 (d,  $J = 7.1$  Hz, 3H).  $^{13}\text{C-NMR}$  (126 MHz,  $\text{CDCl}_3$ )  $\delta$  [ppm]: 207.14, 171.48, 162.84, 162.47, 162.23, 161.97, 140.63, 137.42, 135.75, 130.88, 129.59, 129.44, 127.16, 125.32, 119.95, 74.90, 73.15, 71.35, 69.62, 62.95, 57.40, 52.49, 47.99, 39.08, 37.08, 31.24, 31.09, 29.85, 29.21, 22.65, 20.57, 17.98, 17.66, 11.16. **LRMS** (ESI-Quad) [m/z]: 505.4 [M+H]<sup>+</sup>, **HRMS** (ESI-IT) [m/z]: 505.363758, calculated 505.363599 for  $\text{C}_{28}\text{H}_{42}\text{NO}_4$  [M+H]<sup>+</sup>, err [ppm] -0.315.

**Compound 19:**  $^1\text{H-NMR}$  (700 MHz,  $\text{CDCl}_3$ )  $\delta$  [ppm]: 8.44 – 8.17 (m, 2H), 8.15 – 7.85 (m, 2H), 6.56 (dd,  $J = 15.0, 11.0$  Hz, 1H), 6.38 (d,  $J = 15.4$  Hz, 1H), 5.85 (d,  $J = 10.9$  Hz, 1H), 5.66 (ddd,  $J = 15.5, 6.5, 1.2$  Hz, 1H), 5.52 (dd,  $J = 15.4, 8.0$  Hz, 1H), 5.42 – 5.38 (m, 1H), 5.37 (dd,  $J = 14.9, 9.3$  Hz, 1H), 5.08 (d,  $J = 10.1$  Hz, 1H), 4.43 (d,  $J = 6.1$  Hz, 1H), 4.26 (s, 1H), 3.99 – 3.91 (m, 2H), 3.86 (s, 1H), 3.72 (s, 3H), 3.59 (t,  $J = 9.4$  Hz, 1H), 2.79 – 2.71 (m, 2H), 2.65 (dd,  $J = 17.4, 5.0$  Hz, 1H), 2.30 (d,  $J = 10.4$  Hz, 1H), 2.02 – 1.94 (m, 1H), 1.73 (d,  $J = 1.1$  Hz, 3H), 1.69 (s, 1H), 1.68 (s, 3H), 1.66 – 1.65 (m, 2H), 1.63 (s, 3H), 1.57 (d,  $J = 14.1$  Hz, 1H), 1.48 (ddd,  $J = 14.3, 12.0, 2.7$  Hz, 1H), 1.00 (d,  $J = 6.4$  Hz, 3H), 0.87 (d,  $J = 7.2$  Hz, 3H).  $^{13}\text{C-NMR}$  (176 MHz,  $\text{CDCl}_3$ )  $\delta$  [ppm]: 207.11, 171.64, 162.76, 162.56, 162.35, 162.15, 143.94, 136.83, 135.91, 130.72, 130.21, 129.58, 129.26, 127.33, 124.62, 119.50, 75.04, 73.72, 71.63, 69.60, 52.54, 46.74, 39.47, 39.38, 36.96, 34.38, 31.09, 30.48, 29.86, 22.06, 20.38, 19.90, 17.97, 11.18. **LRMS** (ESI-Quad) [m/z]: 505.4 [M+H]<sup>+</sup>, **HRMS** (ESI-IT) [m/z]: 505.363803, calculated 505.363599 for  $\text{C}_{28}\text{H}_{42}\text{NO}_4$  [M+H]<sup>+</sup>, err [ppm] -0.404.

### Determination of the absolute stereo configuration at C16 for the 16-Aminoratjadones<sup>4-6</sup>

**Synthesis of 16-*R*-Mosher** - (R)-3,3,3-trifluoro-N-((1R,2E,4E,7R,8Z,10E)-1-((2S,4R,5S,6S)-4-hydroxy-5-methyl-6-((E)-prop-1-en-1-yl)tetrahydro-2H-pyran-2-yl)-5,7,9-trimethyl-11-((R)-6-oxo-3,6-dihydro-2H-pyran-2-yl)undeca-2,4,8,10-tetraen-1-yl)-2-methoxy-2-phenylpropanamide, **16-*S*-Mosher** - (S)-3,3,3-trifluoro-N-((1R,2E,4E,7R,8Z,10E)-1-((2S,4R,5S,6S)-4-hydroxy-5-methyl-6-((E)-prop-1-en-1-yl)tetrahydro-2H-pyran-2-yl)-5,7,9-trimethyl-11-((R)-6-oxo-3,6-dihydro-2H-pyran-2-yl)undeca-2,4,8,10-tetraen-1-yl)-2-methoxy-2-phenylpropanamide, **17-*R*-Mosher** - (R)-3,3,3-trifluoro-N-((1S,2E,4E,7R,8Z,10E)-1-((2S,4R,5S,6S)-4-hydroxy-5-methyl-6-((E)-prop-1-en-1-yl)tetrahydro-2H-pyran-2-yl)-5,7,9-trimethyl-11-((R)-6-oxo-3,6-dihydro-2H-pyran-2-yl)undeca-2,4,8,10-tetraen-1-yl)-2-methoxy-2-phenylpropanamide and **17-*S*-Mosher** (S)-3,3,3-trifluoro-N-((1S,2E,4E,7R,8Z,10E)-1-((2S,4R,5S,6S)-4-hydroxy-5-methyl-6-((E)-prop-1-en-1-yl)tetrahydro-2H-pyran-2-yl)-5,7,9-trimethyl-11-((R)-6-oxo-3,6-dihydro-2H-pyran-2-yl)undeca-2,4,8,10-tetraen-1-yl)-2-methoxy-2-phenylpropanamide

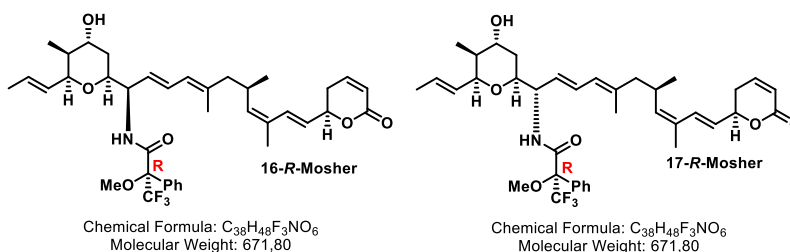

To a solution of 1.85 mg (7.896  $\mu$ mol, 1.2 equiv) (R)-3,3,3-trifluoro-2-methoxy-2-phenylpropanoic acid in 10  $\mu$ L dry CH<sub>2</sub>Cl<sub>2</sub> were added a solution of 0.91 mg (7.896  $\mu$ mol, 1.2 equiv) N-hydroxysuccinimide in 10  $\mu$ L dry THF and a solution of 1.63 mg (7.896  $\mu$ mol, 1.2 equiv) DCC in 10  $\mu$ L dry CH<sub>2</sub>Cl<sub>2</sub> and the mixture was stirred at 23°C for 15 h, before 4.4  $\mu$ L (39.50  $\mu$ mol, 6.0 equiv) NMM and a solution of 3 mg (6.58  $\mu$ mol, 1.0 equiv) 16(*R*)-aminoratjadone **16** were added and the mixture was stirred for additional 30 h. The reaction mixture was diluted with 200  $\mu$ L CH<sub>2</sub>Cl<sub>2</sub> and directly purified by preparative thin-layer chromatography (CH<sub>2</sub>Cl<sub>2</sub>: MeOH/98:2, 1x Development), yielding 2.3 mg (3.42  $\mu$ mol, 52%) of **16-*R*-Mosher** as a yellow solid foam.

In similar manner reaction in the presence of 16*S*-aminoratjadone **17** led to the formation of **17-*R*-Mosher** isolated in 52% (2.3 mg) as a yellow solid foam.

Both compounds **16-*R*-Mosher** and **17-*R*-Mosher** were slightly impured with DCU and traces of silicon grease.

**16-R-Mosher:** TLC (CH<sub>2</sub>Cl<sub>2</sub>:MeOH/98:2) R<sub>f</sub>: 0.46 [UV<sup>254</sup>, CAM], IR (ATR) [cm<sup>-1</sup>]: 3421, 2961, 2924, 2854, 1722, 1693, 1625, 1506, 1451, 1380, 1260, 1164, 1080, 1056, 1015, 966, 918, 880, 802, 767, 735, 717, 698, 661. <sup>19</sup>F-NMR (471 MHz, CDCl<sub>3</sub>) δ [ppm]: -68.80 (s, 3F). <sup>1</sup>H-NMR (500 MHz, CDCl<sub>3</sub>) δ [ppm]: 7.55 – 7.51 (m, 2H), 7.39 – 7.34 (m, 3H), 7.20 (d, *J* = 9.1 Hz, 1H), 6.94 – 6.84 (m, 1H), 6.71 (d, *J* = 15.6 Hz, 1H), 6.32 (ddd, *J* = 15.2, 10.9, 1.0 Hz, 1H), 6.06 (dt, *J* = 9.8, 1.8 Hz, 1H), 5.74 (d, *J* = 11.0 Hz, 1H), 5.70 (dd, *J* = 15.6, 6.5 Hz, 1H), 5.64 (ddd, *J* = 15.4, 6.5, 1.4 Hz, 1H), 5.57 (dd, *J* = 15.2, 7.6 Hz, 1H), 5.42 (ddd, *J* = 15.4, 5.7, 1.7 Hz, 1H), 5.22 (d, *J* = 9.1 Hz, 1H), 5.05 – 4.93 (m, 1H), 4.53 (td, *J* = 8.1, 3.7 Hz, 1H), 4.37 (d, *J* = 5.5 Hz, 1H), 4.02 (s, 1H), 3.98 (d, *J* = 2.5 Hz, 1H), 3.96 – 3.91 (m, 1H), 3.46 (d, *J* = 1.3 Hz, 3H), 2.80 (dq, *J* = 9.7, 7.0 Hz, 1H), 2.50 – 2.41 (m, 2H), 2.02 – 1.96 (m, 2H), 1.97 – 1.90 (m, 2H), 1.79 (d, *J* = 1.2 Hz, 3H), 1.71 (dt, *J* = 6.5, 1.4 Hz, 3H), 1.63 (d, *J* = 1.1 Hz, 3H), 1.60 – 1.57 (m, 1H), 0.92 (d, *J* = 6.6 Hz, 3H), 0.86 (d, *J* = 7.1 Hz, 3H). <sup>13</sup>C-NMR (126 MHz, CDCl<sub>3</sub>) δ [ppm]: 165.29, 164.20, 144.87, 139.34, 137.84, 133.22, 130.39, 130.27, 130.25, 129.52, 129.41, 128.56, 127.78, 126.42, 125.91, 125.80, 125.59, 121.77, 78.55, 74.68, 74.05, 70.31, 55.22, 54.67, 53.58, 49.35, 47.96, 39.59, 34.12, 25.77, 25.10, 21.02, 20.54, 18.10, 17.11, 11.28. LRMS (ESI-Quad) [m/z]: 672.9 [M+H]<sup>+</sup>, HRMS (ESI-IT) [m/z]: 694.332582, calculated 694.332594 for C<sub>38</sub>H<sub>48</sub>F<sub>3</sub>NNaO<sub>6</sub> [M+Na]<sup>+</sup>, err [ppm] 0.017.

**17-R-Mosher:** TLC (CH<sub>2</sub>Cl<sub>2</sub>:MeOH/98:2) R<sub>f</sub>: 0.41 [UV<sup>254</sup>, CAM], IR (ATR) [cm<sup>-1</sup>]: 3418, 2961, 2925, 2854, 1721, 1696, 1625, 1506, 1451, 1360, 1260, 1164, 1081, 1054, 1017, 965, 918, 877, 802, 767, 734, 718, 698, 668. <sup>19</sup>F-NMR (471 MHz, CDCl<sub>3</sub>) δ [ppm]: -68.95 (s, 3F). <sup>1</sup>H-NMR (500 MHz, CDCl<sub>3</sub>) δ [ppm]: 7.60 (dd, *J* = 6.4, 3.0 Hz, 2H), 7.40 – 7.35 (m, 3H), 7.04 (d, *J* = 9.0 Hz, 1H), 6.90 (ddd, *J* = 9.8, 4.5, 3.9 Hz, 1H), 6.67 (d, *J* = 15.6 Hz, 1H), 6.43 (ddd, *J* = 15.2, 10.9, 1.2 Hz, 1H), 6.06 (dt, *J* = 9.8, 1.8 Hz, 1H), 5.74 (d, *J* = 10.8 Hz, 1H), 5.71 (dd, *J* = 15.8, 6.6 Hz, 1H), 5.61 (dd, *J* = 6.5, 1.3 Hz, 1H), 5.58 (dd, *J* = 6.5, 1.4 Hz, 1H), 5.36 (ddq, *J* = 15.3, 5.6, 1.4 Hz, 1H), 5.22 (d, *J* = 9.8 Hz, 1H), 5.04 – 4.95 (m, 1H), 4.42 (t, *J* = 8.0 Hz, 1H), 4.35 (d, *J* = 5.8 Hz, 1H), 4.02 (s, 1H), 3.91 (dt, *J* = 12.1, 2.7 Hz, 1H), 3.86 (d, *J* = 2.7 Hz, 1H), 3.47 (d, *J* = 1.3 Hz, 3H), 2.78 (dq, *J* = 9.7, 6.8 Hz, 1H), 2.47 (ddd, *J* = 7.1, 3.5, 1.6 Hz, 2H), 1.99 (d, *J* = 7.1 Hz, 2H), 1.93 (dt, *J* = 12.1, 3.8 Hz, 2H), 1.79 (d, *J* = 1.2 Hz, 3H), 1.70 (d, *J* = 1.2 Hz, 3H), 1.70 – 1.68 (m, 3H), 1.60 (dt, *J* = 13.1, 3.9 Hz, 1H), 0.93 (d, *J* = 6.6 Hz, 3H), 0.60 (d, *J* = 7.2 Hz, 3H). <sup>13</sup>C-NMR (126 MHz, CDCl<sub>3</sub>) δ [ppm]: 165.79, 164.15, 144.74, 139.22, 137.41, 133.05, 130.53, 130.17, 129.35, 129.32, 128.73, 128.40, 128.10, 127.52, 126.20, 125.87, 125.34, 121.61, 78.76, 77.18, 74.39, 73.91, 70.19, 55.09, 54.58, 53.41, 49.19, 47.79, 39.21, 33.96, 25.61, 24.94, 20.98, 20.36, 17.95, 16.97, 10.67. LRMS (ESI-Quad) [m/z]: 672.9 [M+H]<sup>+</sup>, HRMS (ESI-IT) [m/z]: 694.332578, calculated 694.332594 for C<sub>38</sub>H<sub>48</sub>F<sub>3</sub>NNaO<sub>6</sub> [M+Na]<sup>+</sup>, err [ppm] 0.022.

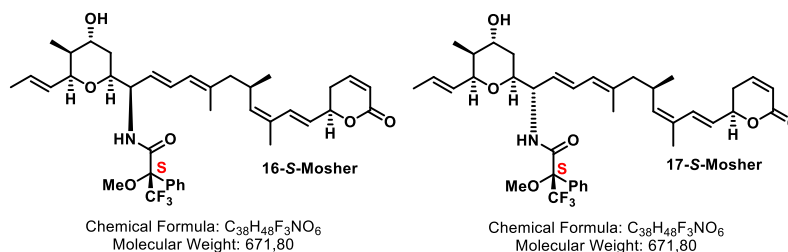

To a solution of 1.85 mg (7.896  $\mu$ mol, 1.2 equiv) (S)-3,3,3-trifluoro-2-methoxy-2-phenylpropanoic acid in 10  $\mu$ L dry  $CH_2Cl_2$  were added a solution of 0.91 mg (7.896  $\mu$ mol, 1.2 equiv) N-hydroxysuccinimide in 10  $\mu$ L dry THF and a solution of 1.63 mg (7.896  $\mu$ mol, 1.2 equiv) DCC in 10  $\mu$ L dry  $CH_2Cl_2$  and the mixture was stirred at 23°C for 15 h, before 4.4  $\mu$ L (39.50  $\mu$ mol, 6.0 equiv) NMM and a solution of 3 mg (6.58  $\mu$ mol, 1.0 equiv) 16(R)-aminoratjadone **16** were added and the mixture was stirred for additional 30 h. The reaction mixture was diluted with 200  $\mu$ L  $CH_2Cl_2$  and directly purified by preparative thin-layer chromatography ( $CH_2Cl_2$ : MeOH/98:2, 1x Development), yielding 2.2 mg (3.27  $\mu$ mol, 50%) of **16-S-Mosher** as a yellow solid foam.

In similar manner reaction in the presence of 16S-aminoratjadone **17** led to the formation of **17-S-Mosher** isolated in 52% (2.3 mg) as a yellow solid foam.

Both compounds **16-R-Mosher** and **16-S-Mosher** were slightly impured with DCU and traces of silicon grease.

**16-S-Mosher**: TLC ( $CH_2Cl_2$ :MeOH/98:2)  $R_f$ : 0.42 [UV<sup>254</sup>, CAM], IR (ATR) [ $cm^{-1}$ ]: 3417, 2960, 2925, 2854, 1721, 1693, 1552, 1511, 1451, 1380, 1335, 1321, 1260, 1102, 1061, 1056, 1015, 966, 918, 880, 866, 801, 767, 734, 717, 698, 668. <sup>19</sup>F-NMR (471 MHz,  $CDCl_3$ )  $\delta$  [ppm]: -69.05 (s, 3F). <sup>1</sup>H-NMR (500 MHz,  $CDCl_3$ )  $\delta$  [ppm]: 7.56 (dd,  $J$  = 6.1, 3.2 Hz, 1H), 7.39 (tt,  $J$  = 3.5, 2.3 Hz, 1H), 6.91 (ddd,  $J$  = 9.8, 5.1, 3.3 Hz, 1H), 6.72 (d,  $J$  = 15.7 Hz, 1H), 6.44 (ddd,  $J$  = 15.1, 10.9, 1.1 Hz, 1H), 6.06 (ddd,  $J$  = 9.8, 2.2, 1.4 Hz, 1H), 5.78 (d,  $J$  = 10.8 Hz, 1H), 5.71 (dd,  $J$  = 15.2, 6.5 Hz, 1H), 5.62 (dd,  $J$  = 6.5, 1.5 Hz, 1H), 5.59 (dd,  $J$  = 6.5, 1.5 Hz, 1H), 5.39 (ddq,  $J$  = 15.5, 5.1, 1.6 Hz, 1H), 5.22 (d,  $J$  = 9.3 Hz, 1H), 5.02 (dt,  $J$  = 10.8, 5.4 Hz, 1H), 4.52 (td,  $J$  = 8.1, 4.0 Hz, 1H), 4.31 (d,  $J$  = 3.0 Hz, 1H), 4.02 (s, 1H), 3.96 (q,  $J$  = 2.6 Hz, 1H), 3.93 – 3.87 (m, 1H), 3.37 (d,  $J$  = 1.2 Hz, 3H), 2.81 (dq,  $J$  = 9.5, 6.9 Hz, 1H), 2.55 – 2.41 (m, 2H), 2.00 (d,  $J$  = 8.4 Hz, 2H), 1.94 (dd,  $J$  = 12.6, 3.5 Hz, 2H), 1.79 (d,  $J$  = 1.2 Hz, 3H), 1.71 (d,  $J$  = 1.1 Hz, 3H), 1.70 (dt,  $J$  = 6.5, 1.4 Hz, 3H), 1.64 – 1.60 (m, 1H), 0.93 (d,  $J$  = 6.6 Hz, 3H), 0.85 (d,  $J$  = 7.1 Hz, 3H). <sup>13</sup>C-NMR (126 MHz,  $CDCl_3$ )  $\delta$  [ppm]: 165.38, 164.24, 144.93, 139.29, 137.94, 132.68, 130.40, 130.30, 130.23, 129.52, 129.48, 128.65, 128.03, 126.22, 125.94, 125.61, 125.52, 121.75, 78.55, 74.46, 73.64, 70.29, 55.03, 54.92, 53.58, 49.35, 47.98, 39.51, 34.12, 25.77, 25.10, 21.11, 20.50, 18.10,

17.16, 11.26. **LRMS** (ESI-Quad) [m/z]: 672.9 [M+H]<sup>+</sup>, **HRMS** (ESI-IT) [m/z]: 694.332531, calculated 694.332594 for C<sub>38</sub>H<sub>48</sub>F<sub>3</sub>NNaO<sub>6</sub> [M+Na]<sup>+</sup>, err [ppm] 0.090.

**17-S-Mosher: TLC** (CH<sub>2</sub>Cl<sub>2</sub>:MeOH/98:2) R<sub>f</sub>: 0.42 [UV<sup>254</sup>, CAM], **IR** (ATR) [cm<sup>-1</sup>]: 3419, 3328, 2926, 2852, 1722, 1654, 1624, 1577, 1534, 1503, 1450, 1380, 1343, 1260, 1245, 1164, 1104, 1088, 1056, 1020, 966, 917, 905, 892, 814, 801, 767, 733, 713, 697, 662. <sup>19</sup>F-NMR (471 MHz, CDCl<sub>3</sub>) δ [ppm]: -68.80 (s, 3F). <sup>1</sup>H-NMR (500 MHz, CDCl<sub>3</sub>) δ [ppm]: 7.56 – 7.50 (m, 2H), 7.40 – 7.33 (m, 3H), 7.22 (d, *J* = 8.8 Hz, 1H), 6.89 (dt, *J* = 9.8, 4.2 Hz, 1H), 6.68 (d, *J* = 15.6 Hz, 1H), 6.33 (ddd, *J* = 15.1, 10.9, 1.2 Hz, 1H), 6.05 (dt, *J* = 9.8, 1.8 Hz, 1H), 5.72 (d, *J* = 12.1 Hz, 1H), 5.71 (dd, *J* = 14.7, 6.1 Hz, 1H), 5.65 (ddd, *J* = 15.4, 6.5, 1.3 Hz, 1H), 5.57 (dd, *J* = 15.3, 7.1 Hz, 1H), 5.43 (ddq, *J* = 15.5, 6.1, 1.6 Hz, 1H), 5.22 (d, *J* = 9.5 Hz, 1H), 4.99 (q, *J* = 6.9 Hz, 1H), 4.48 – 4.41 (m, 1H), 4.41 (d, *J* = 6.1 Hz, 1H), 4.02 (s, 1H), 4.00 (s, 1H), 3.96 (dt, *J* = 12.2, 2.7 Hz, 1H), 3.45 (d, *J* = 1.3 Hz, 3H), 2.78 (dq, *J* = 9.9, 6.8 Hz, 1H), 2.49 – 2.43 (m, 2H), 1.98 (dd, *J* = 7.1, 4.4 Hz, 2H), 1.96 – 1.89 (m, 3H), 1.79 (d, *J* = 1.2 Hz, 3H), 1.70 (dt, *J* = 6.5, 1.3 Hz, 3H), 1.63 (d, *J* = 1.1 Hz, 3H), 0.92 (d, *J* = 9.0 Hz, 3H), 0.90 (d, *J* = 9.5 Hz, 3H). <sup>13</sup>C-NMR (126 MHz, CDCl<sub>3</sub>) δ [ppm]: 165.95, 164.28, 144.90, 139.39, 137.47, 132.91, 130.69, 130.32, 129.56, 129.48, 128.83, 128.62, 128.39, 127.89, 126.55, 126.00, 125.53, 121.77, 78.91, 74.79, 73.95, 70.45, 55.31, 54.86, 53.58, 49.35, 47.93, 39.53, 34.12, 25.77, 25.10, 21.06, 20.54, 18.08, 17.11, 11.07.

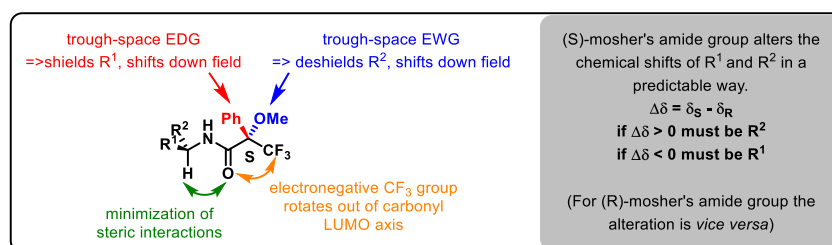

| Synthesised from | CH <sub>3</sub> | H         |
|------------------|-----------------|-----------|
| 16-S-Mosher      | 0.85 ppm        | 6.44 ppm  |
| 16-R-Mosher      | 0.86 ppm        | 6.32 ppm  |
| $\Delta\delta$   | -0.01 ppm       | +0.12 ppm |

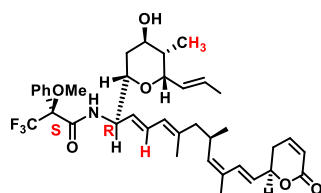

⇒ Absolute configuration at C16 in **16** is R

| Synthesised from | CH <sub>3</sub> | H         |
|------------------|-----------------|-----------|
| 17-S-Mosher      | 0.90 ppm        | 6.33 ppm  |
| 17-R-Mosher      | 0.60 ppm        | 6.43 ppm  |
| $\Delta\delta$   | +0.30 ppm       | -0.10 ppm |

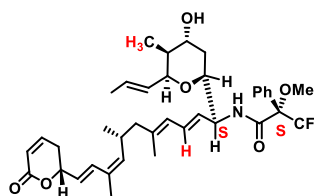

⇒ Absolute configuration at C16 in **17** is S

## Synthesis of 16-Aminoratjadones with bearing terminal alkynes attached via short non-cleavable linkers

### Synthesis of Pent-4-ynoic acid N-hydroxysuccinimid ester (**23**)<sup>iii</sup>

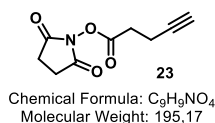

To a solution of 500 mg (5.096 mmol, 1.0 equiv) 3-Butynoic acid and 587 mg (5.096 mmol, 1.0 equiv) N-hydroxysuccinimid in 64 mL of 1:1-mixture of dry EtOAc and dry dioxane was added 1.051 g (5.096 mmol, 1.0 equiv) DCC in one portion at 0°C. The mixture was stirred at 0°C for 5 h and additional 15 h at 23°C, before it was filtered and the filtrate was concentrated under reduced pressure. The residue was recrystallized from CH<sub>2</sub>Cl<sub>2</sub>/Pentane obtaining 800 mg (4.100 mmol, 80%) of **23** as a white amorphous solid.

**N-hydroxysuccinimid ester (23):** <sup>1</sup>H-NMR (500 MHz, CDCl<sub>3</sub>) δ [ppm]: 2.86 (dd, *J* = 8.2, 6.7 Hz, 2H), 2.82 (s, 4H), 2.60 (ddd, *J* = 8.6, 6.7, 2.7 Hz, 2H), 2.03 (t, *J* = 2.7 Hz, 1H). <sup>13</sup>C-NMR (126 MHz, CDCl<sub>3</sub>) δ [ppm] 169.27, 167.39, 81.23, 70.43, 30.70, 25.97, 14.49.

### Synthesis of Compound **20** - N-((1R,2E,4E,7R,8Z,10E)-1-((2S,4R,5S,6S)-4-hydroxy-5-methyl-6-((E)-prop-1-en-1-yl)tetrahydro-2H-pyran-2-yl)-5,7,9-trimethyl-11-((R)-6-oxo-3,6-dihydro-2H-pyran-2-yl)undeca-2,4,8,10-tetraen-1-yl)pent-4-ynamide

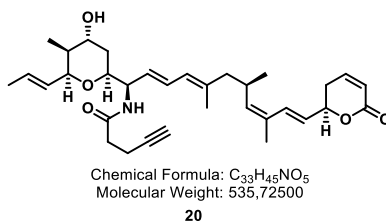

To a solution of 9.5 mg (16.67 μmol, 1.0 equiv) 16*R*-aminoratjadone **16** in 167 μL dry CH<sub>2</sub>Cl<sub>2</sub> were added 5.5 μL (50.03 μmol, 3.0 equiv) NMM and 3.6 mg (18.34 μmol, 1.1 equiv) 4-pentynoic acid N-hydroxysuccinimid ester<sup>7</sup> and the mixture was stirred for 1.5 h at 23°C. The mixture was diluted with 0.25 mL CH<sub>2</sub>Cl<sub>2</sub> and directly purified by preparative thin-layer chromatography (CH<sub>2</sub>Cl<sub>2</sub>: MeOH/98:2, 1x Development), yielding 5.8 mg (10.82 μmol, 65%) of Compound **20** as a pale-yellow solid foam.

<sup>iii</sup> Synthesized according to a procedure of Galibert *et al.*<sup>7</sup>



**Compound 20:** TLC (CH<sub>2</sub>Cl<sub>2</sub>:MeOH/98:2) R<sub>f</sub>: 0.12 [UV<sup>254</sup>, CAM], <sup>1</sup>H-NMR (700 MHz, CDCl<sub>3</sub>) δ [ppm]: 6.91 (ddd, *J* = 9.7, 4.9, 3.6 Hz, 1H), 6.70 (d, *J* = 15.6 Hz, 1H), 6.41 (d, *J* = 11.8 Hz, 1H), 6.39 (dd, *J* = 10.4, 3.8 Hz, 1H), 6.07 (dt, *J* = 9.8, 1.7 Hz, 1H), 5.76 (d, *J* = 10.9 Hz, 1H), 5.70 (dd, *J* = 15.4, 6.7 Hz, 1H), 5.69 – 5.63 (m, 1H), 5.61 (dd, *J* = 15.2, 8.0 Hz, 1H), 5.43 (ddt, *J* = 13.8, 5.9, 1.7 Hz, 1H), 5.22 (d, *J* = 9.7 Hz, 1H), 5.04 – 4.94 (m, 1H), 4.43 (td, *J* = 8.3, 3.5 Hz, 1H), 4.37 – 4.26 (m, 1H), 3.96 (d, *J* = 2.7 Hz, 1H), 3.87 (dt, *J* = 12.4, 2.7 Hz, 1H), 2.80 (dq, *J* = 9.5, 6.9 Hz, 1H), 2.55 – 2.45 (m, 4H), 2.42 (t, *J* = 7.2 Hz, 2H), 1.99 (dd, *J* = 7.0, 2.0 Hz, 2H), 1.97 (t, *J* = 2.6 Hz, 1H), 1.78 (d, *J* = 1.1 Hz, 3H), 1.72 (dt, *J* = 6.7, 1.3 Hz, 3H), 1.71 – 1.70 (m, 3H), 1.66 – 1.60 (m, 2H), 1.38 (d, *J* = 14.2 Hz, 1H), 0.93 (d, *J* = 6.6 Hz, 3H), 0.86 (d, *J* = 7.1 Hz, 3H). <sup>13</sup>C-NMR (176 MHz, CDCl<sub>3</sub>) δ [ppm] 169.94, 164.26, 144.89, 139.46, 137.22, 130.88, 130.54, 130.02, 129.43, 126.74, 126.30, 126.18, 125.39, 121.77, 83.26, 78.79, 74.56, 74.28, 70.36, 69.43, 54.83, 47.88, 39.63, 35.63, 30.57, 30.54, 30.17, 21.15, 20.52, 18.06, 17.26, 15.07, 11.30. LRMS (ESI-Quad) [m/z]: 536.9 [M+H]<sup>+</sup>, HRMS (ESI-IT) [m/z]: 558.318041, calculated 558.318994 for C<sub>33</sub>H<sub>45</sub>NNaO<sub>5</sub> [M+Na]<sup>+</sup>, err [ppm] 1.707.

#### Synthesis of But-3-yn-1-yl (4-nitrophenyl) carbonate (**24**)<sup>iv</sup>

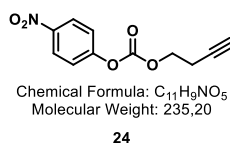

To a solution of 200 mg (2.853 mmol, 1.0 equiv) homoallylic alcohol in 71 mL dry CH<sub>2</sub>Cl<sub>2</sub>, 0.58 mL (7.134 mmol, 2.5 equiv) pyridine and 719 mg (3.567 mmol, 1.25 equiv) *para*-nitrophenylchloroformate were added and the mixture was stirred for 40 min at 23°C. The mixture was quenched by addition of 90 mL of saturated NH<sub>4</sub>Cl solution and extracted with CH<sub>2</sub>Cl<sub>2</sub> (3x 90 mL). The combined organic layers were dried over Na<sub>2</sub>SO<sub>4</sub> and concentrated under reduced pressure. The residue was purified by flash-chromatographie through silicagel (Petroether:EtOAc/95:5 – 9:1) yielding 570 mg (2.423 mmol, 85%) of **24** as a white amorph solid.

**But-3-yn-1-yl (4-nitrophenyl) carbonate (24):** TLC (Petroether:EtOAc/9:1) R<sub>f</sub>: 0.24 [UV<sup>254</sup>], <sup>1</sup>H-NMR (500 MHz, CDCl<sub>3</sub>) δ [ppm]: 8.55 – 7.98 (m, 2H), 7.48 – 7.32 (m, 2H), 4.40 (t, *J* = 6.7 Hz, 2H), 2.68 (td, *J* = 6.7, 2.7 Hz, 2H), 2.08 (t, *J* = 2.7 Hz, 1H). <sup>13</sup>C-NMR (126 MHz, CDCl<sub>3</sub>) δ [ppm] 155.55, 152.39, 145.62, 125.48, 121.89, 79.06, 70.81, 66.81, 19.13.

<sup>iv</sup> Synthesis was based on a procedure of Dommerholt *et al.*<sup>17</sup>

**Synthesis of Compound 21** - But-3-yn-1-yl ((1R,2E,4E,7R,8Z,10E)-1-((2S,4R,5S,6S)-4-hydroxy-5-methyl-6-((E)-prop-1-en-1-yl)tetrahydro-2H-pyran-2-yl)-5,7,9-trimethyl-11-((R)-6-oxo-3,6-dihydro-2H-pyran-2-yl)undeca-2,4,8,10-tetraen-1-yl)carbamate

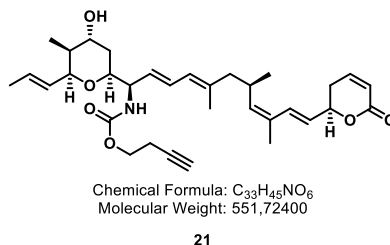

21

To a solution of 4.0 mg (8.77  $\mu$ mol, 1.0 equiv) 16R-aminoratjadone **16** in 88  $\mu$ L dry CH<sub>2</sub>Cl<sub>2</sub> were added 2.9  $\mu$ L (26.34  $\mu$ mol, 3.0 equiv) NMM and 2.3 mg (9.657  $\mu$ mol, 1.1 equiv) but-3-yn-1-yl (4-nitrophenyl) carbonate **24** and the mixture was stirred for 24 h at 23°C. The mixture was diluted with 0.25 mL CH<sub>2</sub>Cl<sub>2</sub> and directly purified by preparative thin-layer chromatography (CH<sub>2</sub>Cl<sub>2</sub>:MeOH/98:2, 1x Development), yielding 4.4 mg (7.90  $\mu$ mol, 90%) of Compound **21** as a pale-yellow solid foam.

**Compound 21:** TLC (CH<sub>2</sub>Cl<sub>2</sub>:MeOH/98:2) R<sub>f</sub>: 0.15 [UV<sup>254</sup>, CAM], IR (ATR) [cm<sup>-1</sup>]: 3442, 3309, 3034, 2963, 2923, 1718, 1653, 1605, 1566, 1497, 1437, 1361, 1335, 1291, 1246, 1136, 1081, 1056, 1013, 967, 937, 918, 883, 816, 776, 722, 683, 651. <sup>1</sup>H-NMR (500 MHz, CDCl<sub>3</sub>)  $\delta$  [ppm]: 6.94 – 6.87 (m, 1H), 6.72 (d, *J* = 15.6 Hz, 1H), 6.39 (dd, *J* = 15.1, 10.8 Hz, 1H), 6.07 (dt, *J* = 9.8, 1.8 Hz, 1H), 5.78 (d, *J* = 10.9 Hz, 1H), 5.76 – 5.67 (m, 1H), 5.66 (ddd, *J* = 15.4, 6.5, 1.4 Hz, 1H), 5.59 (dd, *J* = 15.1, 8.2 Hz, 1H), 5.49 – 5.36 (m, 2H), 5.23 (d, *J* = 9.6 Hz, 1H), 5.09 – 4.97 (m, 1H), 4.35 (d, *J* = 5.5 Hz, 1H), 4.16 (t, *J* = 6.7 Hz, 2H), 4.08 (s, 1H), 3.99 – 3.95 (m, 1H), 3.91 (dt, *J* = 12.3, 2.7 Hz, 1H), 3.49 (s, 1H), 2.88 – 2.70 (m, 1H), 2.55 – 2.45 (m, 4H), 2.10 – 1.94 (m, 3H), 1.79 (d, *J* = 1.2 Hz, 3H), 1.74 – 1.69 (m, 6H), 1.65 – 1.58 (m, 1H), 1.51 (s, 1H), 1.36 (d, *J* = 13.9 Hz, 1H), 0.92 (d, *J* = 6.6 Hz, 3H), 0.85 (d, *J* = 7.1 Hz, 3H). <sup>13</sup>C-NMR (126 MHz, CDCl<sub>3</sub>)  $\delta$  [ppm] 164.06, 155.38, 144.70, 139.28, 137.31, 130.35, 130.20, 129.71, 129.20, 126.75, 126.27, 125.93, 125.37, 121.61, 78.50, 74.34, 70.15, 69.70, 62.52, 56.81, 47.78, 39.51, 30.37, 30.22, 30.00, 20.88, 20.36, 19.39, 17.88, 16.99, 11.14. LRMS (ESI-Quad) [m/z]: 552.4 [M+H]<sup>+</sup>, HRMS (ESI-IT) [m/z]: 552.332090, calculated 552.331965 for C<sub>33</sub>H<sub>46</sub>NO<sub>6</sub> [M+H]<sup>+</sup>, err [ppm] -0.228.

**Synthesis of Compound 22** - But-3-yn-1-yl ((1S,2E,4E,7R,8Z,10E)-1-((2S,4R,5S,6S)-4-hydroxy-5-methyl-6-((E)-prop-1-en-1-yl)tetrahydro-2H-pyran-2-yl)-5,7,9-trimethyl-11-((R)-6-oxo-3,6-dihydro-2H-pyran-2-yl)undeca-2,4,8,10-tetraen-1-yl)carbamate

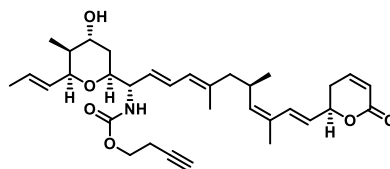

Chemical Formula: C<sub>33</sub>H<sub>45</sub>NO<sub>6</sub>  
Molecular Weight: 551.72

22

To a solution of 5.0 mg (10.97  $\mu$ mol, 1.0 equiv) 16S-aminoratjadone **17** in 110  $\mu$ L dry CH<sub>2</sub>Cl<sub>2</sub> were added 7.2  $\mu$ L (65.82  $\mu$ mol, 6.0 equiv) NMM and 2.84 mg (12.07  $\mu$ mol, 1.1 equiv) but-3-yn-1-yl (4-nitrophenyl) carbonate **24** and the mixture was stirred for 20 h at 23°C. The mixture was diluted with 0.25 mL CH<sub>2</sub>Cl<sub>2</sub> and directly purified by preparative thin-layer chromatography (CH<sub>2</sub>Cl<sub>2</sub>:MeOH/98:2, 1x Development), yielding 4.4 mg (7.90  $\mu$ mol, 90%) of Compound **22** as a pale-yellow solid foam.

**Compound 22:** TLC (CH<sub>2</sub>Cl<sub>2</sub>:MeOH/98:2) R<sub>f</sub>: 0.16 [UV<sup>254</sup>, CAM], <sup>1</sup>H-NMR (500 MHz, CDCl<sub>3</sub>)  $\delta$  [ppm] 6.90 (dt,  $J$  = 9.7, 4.2 Hz, 1H), 6.67 (d,  $J$  = 15.6 Hz, 1H), 6.38 (dd,  $J$  = 14.7, 11.1 Hz, 1H), 6.10 – 6.00 (m, 1H), 5.74 (d,  $J$  = 11.0 Hz, 1H), 5.72 – 5.68 (m, 1H), 5.65 (dd,  $J$  = 14.8, 7.2 Hz, 1H), 5.59 (dd,  $J$  = 15.2, 7.5 Hz, 1H), 5.40 (dd,  $J$  = 15.4, 4.0 Hz, 1H), 5.25 (s, 1H) 5.22 (d,  $J$  = 9.6 Hz, 1H), 4.99 (q,  $J$  = 7.3 Hz, 1H), 4.39 (s, 1H), 4.23 – 4.12 (m, 2H), 4.05 (s, 1H), 4.02 – 3.96 (m, 1H), 3.88 (d,  $J$  = 12.0 Hz, 1H), 2.77 (dt,  $J$  = 13.7, 6.9 Hz, 1H), 2.52 (td,  $J$  = 6.7, 2.6 Hz, 2H), 2.49 – 2.44 (m, 2H), 2.04 – 1.94 (m, 3H), 1.87 – 1.80 (m, 1H), 1.79 (s, 3H), 1.73 – 1.68 (m, 6H), 1.67 – 1.59 (m, 1H), 1.45 (d,  $J$  = 14.2 Hz, 1H), 0.92 (d,  $J$  = 6.6 Hz, 3H), 0.88 (d,  $J$  = 7.1 Hz, 3H). <sup>13</sup>C-NMR (126 MHz, CDCl<sub>3</sub>)  $\delta$  [ppm] 164.31, 156.17, 144.89, 139.45, 137.17, 130.76, 130.34, 129.52, 129.47, 128.28, 126.32, 126.16, 125.47, 121.78, 80.60, 78.96, 74.53, 74.09, 70.47, 69.85, 62.70, 56.99, 47.97, 39.58, 30.63, 30.58, 30.23, 21.12, 20.52, 19.56, 18.07, 17.13, 11.36. LRMS (ESI-Quad) [m/z]: 552.4 [M+H]<sup>+</sup>, HRMS (ESI-IT) [m/z]: 552.332174, calculated 552.331965 for C<sub>33</sub>H<sub>46</sub>NO<sub>6</sub> [M+H]<sup>+</sup>, err [ppm] 0.038.

## Synthesis of 16-Aminoratjadones bearing terminal alkynes and cyclooctynes attached via intracellular cleavable Val-Cit linker

### Synthesis of **Fmoc-Cit-pABA** – (9H-fluoren-9-yl)methyl (S)-1-((4-(hydroxymethyl)phenyl)amino)-1-oxo-5-ureidopentan-2-yl)carbamate<sup>8</sup>

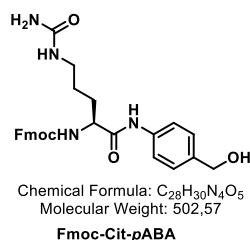

To a solution of 1.0 g (2.516 mmol, 1.0 equiv) Fmoc-Cit-OH in 20 mL dry THF maintained under an argon atm. at -40°C were added 304 μL (2.768 mmol, 1.1 equiv) NMM and 358 μL (2.768 mmol, 1.1 equiv) *iso*-butylchloroformate. The mixture was stirred for 3 h at -40°C before further 332 μL (3.019 mmol, 1.2 equiv) NMM and 372 mg (3.019 mmol, 1.2 equiv) *para*-aminobenzylalcohol were added. The mixture was stirred for an additional 1 h at -40°C and then allowed to warm to 23°C over a period of 20 h. The reaction mixture was concentrated under reduced pressure and the solid residue was purified by flash chromatography through silicagel (CH<sub>2</sub>Cl<sub>2</sub>:MeOH/95:5 – 9:1 – 8:2) yielding 1.264 g (2.515 mmol, 100%) **Fmoc-Cit-pABA** as an amorph pale-yellow solid.

**Fmoc-Cit-pABA**:<sup>v</sup> TLC (CH<sub>2</sub>Cl<sub>2</sub>:MeOH/95:5) R<sub>f</sub>: 0.10 [UV<sup>254</sup>, CAM], IR (ATR) [cm<sup>-1</sup>]: 3280, 3128, 3063, 2923, 2864, 1689, 1653, 1600, 1568, 1532, 1478, 1450, 1414, 1387, 1334, 1281, 12551, 1231, 1164, 1153, 1116, 1103, 1085, 1044, 1033, 1016, 989, 938, 823, 797, 778, 756, 737, 701, 674, 662, 640, 610. <sup>1</sup>H-NMR (500 MHz, DMSO-*d*<sub>6</sub>) δ [ppm]: 9.98 (s, 1H), 7.89 (d, *J* = 7.5 Hz, 2H), 7.75 (t, *J* = 6.5 Hz, 2H), 7.67 (d, *J* = 8.0 Hz, 1H), 7.56 (d, *J* = 8.4 Hz, 2H), 7.42 (t, *J* = 7.4 Hz, 2H), 7.33 (q, *J* = 6.8 Hz, 2H), 7.24 (d, *J* = 8.4 Hz, 2H), 5.99 (t, *J* = 5.5 Hz, 1H), 5.43 (s, 2H), 5.10 (t, *J* = 5.7 Hz, 1H), 4.43 (d, *J* = 5.6 Hz, 2H), 4.30 – 4.25 (m, 2H), 4.25 – 4.20 (m, 1H), 4.20 – 4.13 (m, 1H), 3.11 – 2.99 (m, 1H), 3.01 – 2.87 (m, 1H), 1.74 – 1.63 (m, 2H), 1.65 – 1.54 (m, 2H), 1.53 – 1.44 (m, 2H), 1.43 – 1.34 (m, 2H). <sup>13</sup>C-NMR (126 MHz, DMSO-*d*<sub>6</sub>) δ [ppm]: 170.98, 158.90, 156.10, 143.88, 143.79, 140.70, 137.57, 137.39, 127.64, 127.64, 127.08, 127.06, 126.91, 125.36, 120.10, 120.10, 118.85, 66.05, 65.67, 62.60, 55.03, 54.95, 46.66, 46.07, 29.34, 26.93. LRMS (ESI-Quad) [m/z]: 503.3[M+H]<sup>+</sup>, HRMS (ESI-IT) [m/z]: 503.2294, calculated 503.2289 for C<sub>28</sub>H<sub>31</sub>N<sub>4</sub>O<sub>5</sub> [M+H]<sup>+</sup>, err [ppm] -1.00.

<sup>v</sup> The obtained analytic data were in completed accordance with prior published ones.<sup>8</sup>

**Synthesis of H<sub>2</sub>N-Val-Cit-pABA** – (S)-2-((S)-2-amino-3-methylbutanamido)-N-(4-(hydroxymethyl)-phenyl)-5-ureidopentanamide

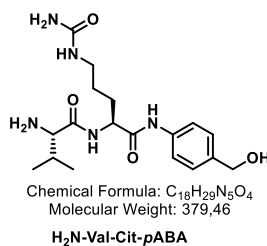

To a solution of 100 mg (0.199 mmol, 1.0 equiv) **Fmoc-Cit-pABA** in 3.9 mL dry DMF was added 318  $\mu$ L (1.6 mL/mmol **Fmoc-Cit-pABA**) piperidine and the mixture was stirred for 3 h at 23°C (TLC (CH<sub>2</sub>Cl<sub>2</sub>:MeOH/9:1) R<sub>f</sub>: 0.05 [Nin]), before the mixture was diluted with 10 mL toluene, concentrated under reduced pressure and co-evaporated three times with 10 mL toluene. The raw solid **H<sub>2</sub>N-Cit-PABOH** was re-dissolved in 900  $\mu$ L dry DMF and added together with 142  $\mu$ L (0.7956 mmol, 4.0 equiv) DiPEA to a solution of 101 mg (0.199 mmol, 1.0 equiv) Fmoc-Val-OPfp in 900  $\mu$ L dry DMF at 23°C. The mixture was stirred for 24 h at 23°C (TLC (CH<sub>2</sub>Cl<sub>2</sub>:MeOH/8:2) R<sub>f</sub>: 0.15 [UV<sup>254</sup>, CAM]), before 318  $\mu$ L (1.6 mL/mmol **Fmoc-Cit-pABA**) piperidine was added and the mixture was stirred for 1 h at 23°C. The mixture was diluted with 10 mL toluene, concentrated under reduced pressure and co-evaporated three times with 10 mL toluene. The resulting residue was purified by flash chromatography through silicagel (CH<sub>2</sub>Cl<sub>2</sub>:MeOH/1:0 - 95:5 – 9:1 – 8:2) yielding 70 mg (0.185 mmol, 93%) **H<sub>2</sub>N-Val-Cit-pABA** as an amorph, pale-yellow solid.

**H<sub>2</sub>N-Val-Cit-pABA**: TLC (CH<sub>2</sub>Cl<sub>2</sub>:MeOH/8:2) R<sub>f</sub>: 0.05 [UV<sup>254</sup>, CAM], <sup>1</sup>H-NMR (500 MHz, MeOD-*d*<sub>4</sub>)  $\delta$  [ppm]: 7.54 (d, *J* = 8.6 Hz, 2H), 7.30 (d, *J* = 8.7 Hz, 2H), 4.56 (s, 2H), 4.58 – 4.51 (m, 1H), 3.27 (d, *J* = 5.6 Hz, 1H), 3.21 (dt, *J* = 13.8, 7.0 Hz, 1H), 3.16 – 3.08 (m, 1H), 2.08 – 1.96 (m, 1H), 1.94 – 1.84 (m, 1H), 1.83 – 1.68 (m, 2H), 1.69 – 1.50 (m, 2H), 1.00 (d, *J* = 6.9 Hz, 3H), 0.94 (d, *J* = 6.8 Hz, 3H). <sup>13</sup>C-NMR (126 MHz, MeOD-*d*<sub>4</sub>)  $\delta$  [ppm]: 175.88, 172.35, 162.33, 138.74, 138.65, 128.60, 121.20, 64.82, 61.19, 54.83, 33.19, 30.68, 27.86, 19.68, 17.78. LRMS (ESI-Quad) [m/z]: 380.3 [M+H]<sup>+</sup>, HRMS (ESI-IT) [m/z]: 380.229231, calculated 380.229231 for C<sub>18</sub>H<sub>30</sub>N<sub>5</sub>O<sub>4</sub> [M+H]<sup>+</sup>, err [ppm] -0.071.

### Synthesis of BCN-*p*NPC – ((1R,8S,9s)-bicyclo[6.1.0]non-4-yn-9-yl)methyl (4-nitrophenyl) carbonate

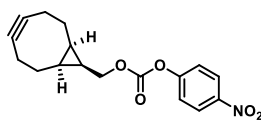

Chemical Formula: C<sub>17</sub>H<sub>17</sub>NO<sub>5</sub>  
Molecular Weight: 315,33

BCN-*p*NPC

To a solution of 100 mg ( 0.666 mmol, 1.0 equiv) ((1R,8S,9s)-bicyclo[6.1.0]non-4-yn-9-yl)methanol in 16.6 mL dry CH<sub>2</sub>Cl<sub>2</sub> was added 134 μL (1.664 mmol, 2.5 equiv) pyridine and 168 mg (0.831 mmol, 1.25 equiv) 4-nitrophenyl chloroformate and the mixture was stirred for 20 min at 23°C, before it was quenched by addition of 20 mL saturated ammonium chloride solution. The mixture was extracted with CH<sub>2</sub>Cl<sub>2</sub> (3x 20 mL), the combined organic layers were dried over Na<sub>2</sub>SO<sub>4</sub> and concentrated under reduced pressure. The residue was purified by flash chromatography through silicagel (PE:EtOAc/95:5 – 9:1) yielding 196 mg (0.6215 mmol, 93%) of **BCN-*p*NPC** as a highly viscous liquid, slowly solidifying giving an amorph white solid.

**BCN-*p*NPC**: TLC (PE:EtOAc/9:1) R<sub>f</sub>: 0.50 [UV<sup>254</sup>, CAM], IR (ATR) [cm<sup>-1</sup>]: 2918, 2852, 1760, 1616, 1595, 1523, 1492, 1470, 1440, 1354, 1340, 1323, 1247, 1203, 1164, 1139, 1108, 1056, 1027, 1013, 989, 944, 921, 859, 817, 776, 733, 703, 670, 628. <sup>1</sup>H-NMR (700 MHz, CDCl<sub>3</sub>) δ [ppm]: 8.29 – 8.24 (m, 2H), 7.44 – 7.35 (m, 2H), 4.38 (d, *J* = 8.3 Hz, 2H), 2.36 – 2.26 (m, 4H), 2.25 – 2.19 (m, 2H), 1.64 – 1.54 (m, 2H), 1.49 (p, *J* = 8.6 Hz, 1H), 1.09 – 0.99 (m, 2H). <sup>13</sup>C-NMR (176 MHz, CDCl<sub>3</sub>) δ [ppm]: 155.73, 152.70, 145.49, 125.45, 121.91, 98.85, 68.16, 29.18, 21.50, 20.65, 17.38.

### Synthesis of BCN-O(CO)HN-Val-Cit-*p*ABA – (S)-2-((S)-2-amino-3-methylbutanamido)-N-(4-(hydroxymethyl)phenyl)-5-ureidopentanamide

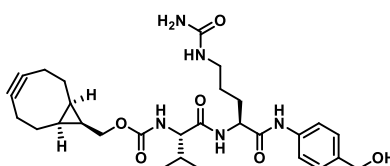

Chemical Formula: C<sub>29</sub>H<sub>41</sub>N<sub>5</sub>O<sub>6</sub>  
Molecular Weight: 555,68  
BCN-O(CO)HN-Val-Cit-*p*ABA 29

To a solution of 100 mg (0.264 mmol, 1.0 equiv) **H<sub>2</sub>N-Val-Cit-PABA** in 2.65 mL dry DMF was added 87 μL (0.791 mmol, 3.0 equiv) NMM and a solution of 87 mg (0.277 mmol, 1.05 equiv) **BCN-*p*NPC** in 2.65 mL dry DMF and the mixture was stirred for 24 h at 23°C, before the reaction was quenched by addition of 50 mL saturated ammonium chloride solution. The mixture was extracted with EtOAc (3x 20 mL). The combined

organic layers were dried over Na<sub>2</sub>SO<sub>4</sub>, concentrated under reduced pressure and co-evaporated twice with 10 mL toluene. The resulting solid residue was purified by flash chromatography through silicagel (CH<sub>2</sub>Cl<sub>2</sub>:MeOH/95:5 – 9:1 – 8:2) yielding 132 mg (0.238 mmol, 90%) **BCN-O(CO)HN-Val-Cit-pABA** as an amorph, white solid.

**BCN-O(CO)HN-Val-Cit-pABA**: TLC (CH<sub>2</sub>Cl<sub>2</sub>:MeOH/9:1) R<sub>f</sub>: 0.21 [UV<sup>254</sup>, CAM], IR (ATR) [cm<sup>-1</sup>]: 3444, 3271, 2925, 2853, 2604, 2468, 1694, 1637, 1516, 1439, 1417, 1381, 1335, 1301, 1238, 1172, 1139, 1120, 1090, 1027, 911, 864, 825, 770, 734, 696, 670, 582, 554. <sup>1</sup>H-NMR (500 MHz, MeOD-*d*<sub>4</sub>) δ [ppm]: 7.56 (d, *J* = 8.4 Hz, 2H), 7.30 (d, *J* = 8.7 Hz, 2H), 4.56 (s, 2H), 4.52 (dd, *J* = 8.9, 5.1 Hz, 1H), 4.17 (dd, *J* = 8.1, 1.5 Hz, 2H), 3.95 (d, *J* = 6.8 Hz, 1H), 3.20 (dt, *J* = 13.8, 7.0 Hz, 1H), 3.11 (dt, *J* = 13.5, 6.7 Hz, 1H), 2.33 – 2.19 (m, 3H), 2.19 – 2.10 (m, 2H), 2.10 – 2.03 (m, 1H), 1.92 (td, *J* = 14.3, 6.1 Hz, 1H), 1.75 (ddp, *J* = 14.1, 9.7, 4.9 Hz, 1H), 1.58 (dtd, *J* = 16.1, 10.9, 9.8, 6.8 Hz, 4H), 1.40 (p, *J* = 8.4 Hz, 1H), 0.99 (d, *J* = 6.8 Hz, 3H), 0.96 (d, *J* = 6.8 Hz, 2H). <sup>13</sup>C-NMR (126 MHz, MeOD-*d*<sub>4</sub>) δ [ppm]: 174.50, 172.14, 162.31, 159.17, 138.74, 128.57, 121.20, 120.41, 99.47, 64.83, 64.15, 62.30, 54.87, 40.30, 31.83, 30.50, 30.13, 27.84, 21.92, 21.42, 19.79, 18.92, 18.66. LRMS (ESI-Quad) [m/z]: 556.4 [M+H]<sup>+</sup>, HRMS (ESI-IT) [m/z]: 556.313070, calculated 556.312961 for C<sub>29</sub>H<sub>42</sub>N<sub>5</sub>O<sub>6</sub> [M+H]<sup>+</sup>, err [ppm] -0.197.

**Synthesis of BCN-O(CO)HN-Val-Cit-pAB-pNPC (27)** – ((1R,8S,9S)-bicyclo[6.1.0]non-4-yn-9-yl)methyl ((S)-3-methyl-1-(((S)-1-(((4-nitrophenoxy)carbonyl)oxy)methyl)phenyl)amino)-1-oxo-5-ureidopentan-2-yl)amino)-1-oxobutan-2-yl)carbamate

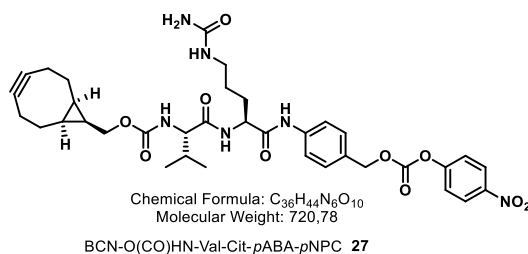

To a solution of 70 mg (0.126 mmol, 1.0 equiv) **BCN-O(CO)HN-Val-Cit-pABA** in 420 μL dry DMF was added 32 μL (0.189 mmol, 1.5 equiv) DiPEA and 77 mg (0.252 mmol, 2.0 equiv) bis-4-nitrophenyl carbonate and the mixture was stirred for 16 h at 23°C. The reaction mixture was diluted with 300 μL CH<sub>2</sub>Cl<sub>2</sub> and directly purified by flash chromatography through silicagel (CH<sub>2</sub>Cl<sub>2</sub>: MeOH/95:5), yielding 78.1 mg (0.108 mmol, 86%) of **BCN-O(CO)HN-Val-Cit-PAB-pNPC 27** as an amorph, white solid.

**BCN-O(CO)HN-Val-Cit-pAB-pNPC (27)**: TLC (CH<sub>2</sub>Cl<sub>2</sub>:MeOH/9:1) R<sub>f</sub>: 0.62 [UV<sup>254</sup>], <sup>1</sup>H-NMR (500 MHz, MeOD-*d*<sub>4</sub>) δ [ppm]: 8.33 – 8.26 (m, 2H), 7.68 – 7.60 (m, 2H), 7.50 – 7.43 (m, 2H), 7.43 (s, 2H), 5.26 (s, 2H), 4.54 (dt,

$J = 9.1, 3.9$  Hz, 1H), 4.17 (dd,  $J = 8.1, 6.2$  Hz, 2H), 3.95 (d,  $J = 6.8$  Hz, 1H), 3.20 (dq,  $J = 15.0, 8.1, 7.5$  Hz, 1H), 3.11 (dt,  $J = 13.5, 6.6$  Hz, 1H), ), 2.29 – 2.00 (m, 7H), 1.98 – 1.86 (m, 0H), 1.75 (dq,  $J = 14.2, 9.3, 4.9$  Hz, 1H), 1.67 – 1.49 (m, 4H), 1.39 (p,  $J = 8.6$  Hz, 1H), 0.99 (d,  $J = 6.8$  Hz, 3H), 0.96 (d,  $J = 6.8$  Hz, 3H), 0.94 – 0.89 (m, 1H).  $^{13}\text{C-NMR}$  (126 MHz, MeOD- $d_4$ )  $\delta$  [ppm]: 202.71, 200.46, 190.48, 187.35, 185.31, 182.15, 175.05, 168.38, 160.13, 158.69, 154.41, 151.45, 149.34, 127.64, 99.74, 92.31, 90.51, 83.05, 68.43, 59.97, 58.59, 58.31, 58.28, 56.02, 50.08, 49.57, 47.95, 47.07, 46.85. **LRMS** (ESI-Quad) [m/z]: 721.4 [M+H]<sup>+</sup>, **HRMS** (ESI-IT) [m/z]: 721.3198819, calculated 721.319168 for C<sub>36</sub>H<sub>45</sub>N<sub>6</sub>O<sub>10</sub> [M+H]<sup>+</sup>, err [ppm] -0.903.

**Synthesis of BCN-O(CO)HN-Val-Cit-pABO(CO)-16R-Aminoratjadone(25)** – ((1R,8S,9s)-bicyclo[6.1.0]non-4-yn-9-yl)methyl ((S)-1-(((S)-1-((4-((((1R,2E,4E,7R,8Z,10E)-1-((2S,4R,5S,6S)-4-hydroxy-5-methyl-6-((E)-prop-1-en-1-yl)tetrahydro-2H-pyran-2-yl)-5,7,9-trimethyl-11-((R)-6-oxo-3,6-dihydro-2H-pyran-2-yl)undeca-2,4,8,10-tetraen-1-yl)carbamoyl)oxy)methyl)phenyl)amino)-1-oxo-5-ureidopentan-2-yl)amino)-3-methyl-1-oxobutan-2-yl)carbamate

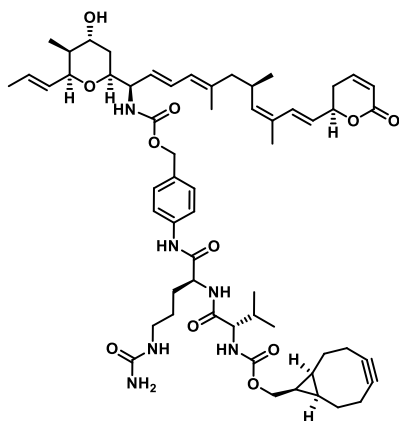

Chemical Formula: C<sub>58</sub>H<sub>80</sub>N<sub>6</sub>O<sub>11</sub>  
Molecular Weight: 1037.31

BCN-O(CO)HN-Val-Cit-pABO(CO)-16R-Aminoratjadone **25**

To a solution of 16.2 mg (35.48  $\mu\text{mol}$ , 1.0 equiv) 16R-aminoratjadone **16** in 237  $\mu\text{L}$  dry DMF were added 23.4  $\mu\text{L}$  (0.212 mmol, 6.0 equiv) NMM and 28.1 mg (39.03  $\mu\text{mol}$ , 1.1 equiv) BCN-O(CO)HN-Val-Cit-PAB-pNPC **27** and the mixture was stirred for 26 h at 23°C. The reaction mixture was diluted with 1.0 mL CH<sub>2</sub>Cl<sub>2</sub> and directly purified by preparative thin-layer chromatography (CH<sub>2</sub>Cl<sub>2</sub>:MeOH/95:5, 3x Development), yielding 28.0 mg (26.99  $\mu\text{mol}$ , 76%) of BCN-O(CO)HN-Val-Cit-pABO(CO)-16R-Aminoratjadone**25** as an amorph, white solid.

**BCN-O(CO)HN-Val-Cit-pABO(CO)-16R-Aminoratjadone(25): TLC** (CH<sub>2</sub>Cl<sub>2</sub>:MeOH/95:5) R<sub>f</sub>: 0.21 [UV<sup>254</sup>, CAM], **IR** (ATR) [cm<sup>-1</sup>]: 3316, 2963, 2927, 1697, 1657, 1609, 1517, 1451, 1415, 1381, 1311, 1248, 1141, 1057, 1018, 967, 912, 819, 777, 732, 656.  $^1\text{H-NMR}$  (700 MHz, CDCl<sub>3</sub>)  $\delta$  [ppm] 9.24 (s, 1H), 7.57 – 7.47 (m,



2H), 7.24 (d,  $J = 7.2$  Hz, 2H), 6.91 (s, 1H), 6.71 (d,  $J = 15.4$  Hz, 1H), 6.43 – 6.30 (m, 1H), 6.06 (d,  $J = 9.5$  Hz, 1H), 5.77 (d,  $J = 10.8$  Hz, 1H), 5.69 (dd,  $J = 15.7, 6.8$  Hz, 1H), 5.67 – 5.55 (m, 3H), 5.39 (dd,  $J = 15.4, 4.6$  Hz, 1H), 5.23 (d,  $J = 9.1$  Hz, 1H), 5.01 (dq,  $J = 29.5, 13.4, 11.7$  Hz, 3H), 4.69 (s, 1H), 4.33 (s, 1H), 4.20 – 4.12 (m, 1H), 4.08 (s, 2H), 3.92 (s, 1H), 3.88 (d,  $J = 11.7$  Hz, 1H), 3.26 (s, 1H), 3.09 (s, 1H), 2.79 (s, 1H), 2.48 (d,  $J = 5.8$  Hz, 2H), 2.30 – 2.13 (m, 7H), 2.13 – 2.06 (m, 1H), 2.03 – 1.94 (m, 2H), 1.92 – 1.83 (m, 1H), 1.78 (s, 3H), 1.72 – 1.58 (m, 10H), 1.51 (s, 4H), 1.40 – 1.27 (m, 3H), 0.95 (d,  $J = 5.9$  Hz, 3H), 0.92 (d,  $J = 6.5$  Hz, 9H), 0.83 (d,  $J = 7.1$  Hz, 3H).  $^{13}\text{C-NMR}$  (176 MHz,  $\text{CDCl}_3$ )  $\delta$  [ppm]: 172.47, 170.40, 164.57, 161.98, 161.76, 160.52, 157.27, 155.96, 145.30, 139.64, 137.87, 137.40, 132.91, 130.83, 130.44, 129.74, 129.35, 128.91, 127.00, 126.31, 126.11, 125.39, 121.60, 120.20, 120.10, 98.96, 78.96, 74.54, 70.18, 66.37, 63.57, 60.67, 57.03, 53.02, 48.02, 39.48, 31.24, 30.50, 30.38, 30.18, 29.14, 21.55, 21.10, 20.51, 20.31, 19.45, 18.10, 18.05, 17.78, 17.07, 11.31. **LRMS** (ESI-Quad) [m/z]: 1038.5 [M+H]<sup>+</sup>, **HRMS** (ESI-IT) [m/z]: 1037.5958, calculated 1037.5958 for  $\text{C}_{58}\text{H}_{80}\text{N}_6\text{O}_{11}$  [M+H]<sup>+</sup>, err [ppm] 0.0.

**Synthesis of Homopropargyl-O(CO)HN-Val-Cit-pABA** – But-3-yn-1-yl ((S)-1-(((S)-1-((4-(hydroxymethyl)phenyl)amino)-1-oxo-5-ureidopentan-2-yl)amino)-3-methyl-1-oxobutan-2-yl)carbamate

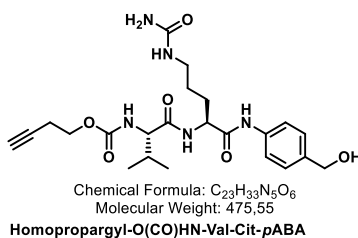

To a solution of 495 mg (1.304 mmol, 1.0 equiv) **H<sub>2</sub>N-Val-Cit-pABA** in 13 mL dry DMF was added 430  $\mu\text{L}$  (3.913 mmol, 3.0 equiv) NMM and a solution of 310 mg (1.318 mmol, 1.01 equiv) but-3-yn-1-yl (4-nitrophenyl) carbonate **24** in 2.65 mL dry DMF and the mixture was stirred for 16 h at 23°C, before the reaction was quenched by addition of 220 mL saturated ammonium chloride solution. The mixture was extracted with EtOAc (3x 220 mL). The combined organic layers were dried over  $\text{Na}_2\text{SO}_4$ , concentrated under reduced pressure and co-evaporated twice with 60 mL toluene. The resulting solid residue was purified by flash chromatography through silicagel ( $\text{CH}_2\text{Cl}_2$ :MeOH/95:5 – 8:2 – 1:1) yielding 409.2 mg (0.861 mmol, 66%) **Homopropargyl-O(CO)HN-Val-Cit-pABA** as an amorph, white solid.

**Homopropargyl-O(CO)HN-Val-Cit-pABA**: TLC ( $\text{CH}_2\text{Cl}_2$ :MeOH/9:1)  $R_f$ : 0.17 [UV<sup>254</sup>, CAM], IR (ATR) [ $\text{cm}^{-1}$ ]: 3267, 2960, 2925, 2871, 1690, 1639, 1602, 1535, 1465, 1445, 1415, 1386, 1339, 1295, 1248, 1184, 1136, 1117, 1094, 1075, 1035, 1015, 924, 823, 803, 774, 697, 661, 651, 606.  $^1\text{H-NMR}$  (500 MHz,  $\text{DMSO}-d_6$ )  $\delta$  [ppm]: 9.96 (s, 1H), 8.06 (d,  $J = 7.6$  Hz, 1H), 7.54 (d,  $J = 8.5$  Hz, 2H), 7.23 (d,  $J = 8.6$  Hz, 3H), 5.99 (t,  $J = 5.6$

Hz, 2H), 5.41 (s, 2H), 5.09 (t,  $J = 5.7$  Hz, 1H), 4.42 (d,  $J = 5.6$  Hz, 3H), 4.43 – 4.36 (m, 1H), 4.08 – 3.96 (m, 3H), 3.89 (dd,  $J = 8.6, 7.0$  Hz, 1H), 3.01 (dt,  $J = 13.0, 6.5$  Hz, 1H), 2.94 (dq,  $J = 13.0, 6.4$  Hz, 1H), 2.86 (t,  $J = 2.6$  Hz, 1H), 2.47 (dt,  $J = 6.6, 3.4$  Hz, 3H), 1.97 (dq,  $J = 13.5, 6.7$  Hz, 1H), 1.77 – 1.63 (m, 1H), 1.58 (dtd,  $J = 13.5, 9.5, 4.8$  Hz, 2H), 1.51 – 1.27 (m, 4H), 0.87 (d,  $J = 6.8$  Hz, 3H), 0.83 (d,  $J = 6.8$  Hz, 3H).  **$^{13}\text{C-NMR}$**  (126 MHz, MeOD- $d_4$ )  $\delta$  [ppm]: 171.13, 170.38, 158.85, 155.94, 137.50, 137.43, 126.92, 118.84, 81.16, 72.48, 62.58, 62.10, 60.07, 53.04, 39.52, 39.35, 39.19, 39.02, 38.57, 30.38, 29.50, 26.77, 19.19, 18.78, 18.18. **LRMS** (ESI-Quad) [m/z]: 476.3 [M+H]<sup>+</sup>, **HRMS** (ESI-IT) [m/z]: 476.250842, calculated 476.250360 for C<sub>23</sub>H<sub>34</sub>N<sub>5</sub>O<sub>6</sub> [M+H]<sup>+</sup>, err [ppm] -1.012

**Synthesis of Homopropargyl-O(CO)HN-Val-Cit-pABA-pNPC (28)** – But-3-yn-1-yl ((S)-3-methyl-1-(((S)-1-(((4-((4-nitrophenoxy)carbonyloxy)methyl)phenyl)amino)-1-oxo-5-ureidopentan-2-yl)amino)-1-oxobutan-2-yl)carbamate

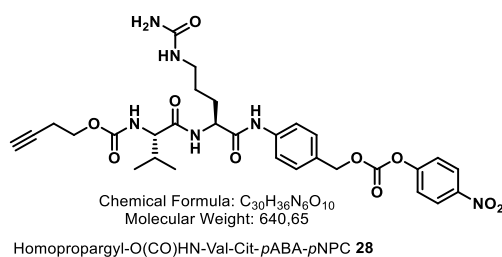

To a solution of 50 mg (0.105 mmol, 1.0 equiv) **Homopropargyl-O(CO)HN-Val-Cit-pABA** in 350  $\mu\text{L}$  dry DMF was added 27  $\mu\text{L}$  (0.158 mmol, 1.5 equiv) DiPEA and 63.5 mg (0.210, 2.0 equiv) bis-4-nitrophenyl carbonate and the mixture was stirred for 6 h at 23°C. The reaction mixture was diluted with 300  $\mu\text{L}$  CH<sub>2</sub>Cl<sub>2</sub> and directly purified by flash chromatography through silicagel (CH<sub>2</sub>Cl<sub>2</sub>: MeOH/95:5), yielding 43 mg (0.067 mmol, 64%) of Homopropargyl-O(CO)HN-Val-Cit-PAB-pNPC **28** as an amorph, pale-yellow solid.

**Homopropargyl-O(CO)HN-Val-Cit-pABA-pNPC (28): TLC** (CH<sub>2</sub>Cl<sub>2</sub>:MeOH/95:5) R<sub>f</sub>: 0.32 [UV<sup>254</sup>],  **$^1\text{H-NMR}$**  (700 MHz, DMSO- $d_6$ )  $\delta$  [ppm]: 10.12 (s, 1H), 8.38 – 8.23 (m, 2H), 8.11 (dd,  $J = 15.3, 8.3$  Hz, 1H), 7.64 (d,  $J = 8.5$  Hz, 1H), 7.59 – 7.50 (m, 2H), 7.41 (d,  $J = 8.6$  Hz, 1H), 7.24 (d,  $J = 8.8$  Hz, 1H), 5.97 (d,  $J = 5.1$  Hz, 1H), 5.41 (s, 2H), 5.24 (s, 1H), 4.48 – 4.35 (m, 1H), 4.02 (tdd,  $J = 10.5, 6.6, 3.9$  Hz, 2H), 3.92 – 3.85 (m, 1H), 3.03 (dq,  $J = 13.0, 6.6$  Hz, 1H), 2.95 (dq,  $J = 12.9, 6.3$  Hz, 1H), 2.86 (t,  $J = 2.5$  Hz, 1H), 2.30 – 2.09 (m, 1H), 1.97 (dq,  $J = 13.6, 6.8$  Hz, 1H), 1.69 (dt,  $J = 15.3, 7.7$  Hz, 1H), 1.58 (dd,  $J = 13.5, 4.8$  Hz, 1H), 1.44 (ddd,  $J = 17.4, 12.6, 7.6$  Hz, 2H), 1.35 (dd,  $J = 8.4, 4.7$  Hz, 1H), 0.87 (d,  $J = 6.8$  Hz, 3H), 0.83 (d,  $J = 6.7$  Hz, 3H).  **$^{13}\text{C-NMR}$**  (176 MHz, DMSO- $d_6$ )  $\delta$  [ppm]: 171.17, 170.71, 158.84, 155.92, 155.26, 151.93, 145.15, 139.34, 129.47, 129.27, 126.16, 125.38, 122.60, 122.58, 119.00, 115.77, 98.93, 81.14, 72.46, 70.22, 67.60, 62.07, 60.00, 53.55,

53.10, 30.36, 29.36, 28.49, 26.77, 20.77, 19.91, 19.16, 18.76, 18.16, 18.06, 16.92, 16.72, 12.45. **LRMS** (ESI-Quad) [m/z]: 641.7 [M+H]<sup>+</sup>.

**Synthesis of Homopropargyl-O(CO)HN-Val-Cit-pABO(CO)-16R-Aminoratjadone(26)** – But-3-yn-1-yl ((S)-1-(((S)-1-(4-((((1R,2E,4E,7R,8Z,10E)-1-((2S,4R,5S,6S)-4-hydroxy-5-methyl-6-((E)-prop-1-en-1-yl)tetrahydro-2H-pyran-2-yl)-5,7,9-trimethyl-11-((R)-6-oxo-3,6-dihydro-2H-pyran-2-yl)undeca-2,4,8,10-tetraen-1-yl)carbamoyl)-oxy)methyl)phenyl)amino)-1-oxo-5-ureidopentan-2-yl)amino)-3-methyl-1-oxobutan-2-yl)carbamate

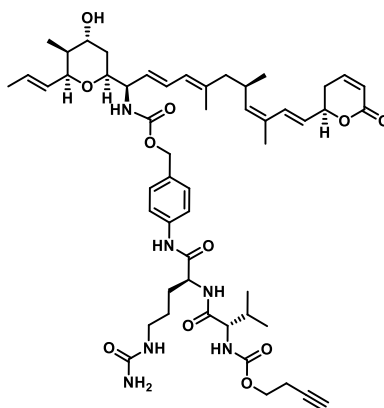

Chemical Formula: C<sub>52</sub>H<sub>72</sub>N<sub>6</sub>O<sub>11</sub>  
Molecular Weight: 957,18

Homopropargyl-O(CO)HN-Val-Cit-pABO(CO)NH-Ratja **26**

To a solution of 7.0 mg (12.28 μmol, 1.0 equiv) 16R-aminoratjadone **16** in 123 μL dry DMF were added 8.1 μL (73.7 μmol, 6.0 equiv) NMM and 8.7 mg (13.51 μmol, 1.1 equiv) Homopropargyl-O(CO)HN-Val-Cit-pAB-pNPC **28** and the mixture was stirred for 30 h at 23°C. The reaction mixture was diluted with 1.0 mL CH<sub>2</sub>Cl<sub>2</sub> and directly purified by preparative thin-layer chromatography (CH<sub>2</sub>Cl<sub>2</sub>:MeOH:EtOAc/9:1:1, 2x Development), yielding 7.8 mg (8.104 μmol, 66%) of Homopropargyl-O(CO)HN-Val-Cit-PABO(CO)-16R-Aminoratjadone **26** as an amorph, white solid.

**Homopropargyl-O(CO)HN-Val-Cit-pABO(CO)-16R-Aminoratjadone(26): TLC** (CH<sub>2</sub>Cl<sub>2</sub>:MeOH/9:1) R<sub>f</sub>: 0.49 [UV<sup>254</sup>, CAM], **<sup>1</sup>H-NMR** (700 MHz, MeOD-*d*<sup>4</sup>) δ [ppm] 7.57 (dd, *J* = 8.8, 2.2 Hz, 2H), 7.36 – 7.25 (m, 2H), 7.02 (ddd, *J* = 9.8, 5.6, 2.8 Hz, 1H), 6.78 (d, *J* = 15.7 Hz, 1H), 6.37 (dd, *J* = 15.2, 10.8 Hz, 1H), 6.01 (ddd, *J* = 9.8, 2.5, 1.2 Hz, 1H), 5.77 (d, *J* = 10.9 Hz, 1H), 5.74 (dd, *J* = 15.6, 6.4 Hz, 1H), 5.67 (ddd, *J* = 15.4, 6.5, 1.5 Hz, 1H), 5.59 (dd, *J* = 15.2, 6.9 Hz, 1H), 5.42 (ddd, *J* = 15.4, 5.6, 1.7 Hz, 1H), 5.22 (d, *J* = 9.8 Hz, 1H), 5.10 – 5.06 (m, 1H), 5.05 (s, 2H), 4.51 (dd, *J* = 9.1, 5.2 Hz, 1H), 4.33 (ddt, *J* = 5.7, 2.8, 1.5 Hz, 1H), 4.18 – 4.08 (m, 3H), 3.96 (d, *J* = 6.8 Hz, 1H), 3.86 (q, *J* = 3.0 Hz, 1H), 3.78 (dd, *J* = 12.4, 5.5 Hz, 1H), 3.23 – 3.16 (m, 1H), 3.11 (dt, *J* = 13.4, 6.7 Hz, 1H), 2.89 (dt, *J* = 16.0, 6.9 Hz, 1H), 2.57 – 2.53 (m, 0H), 2.52 (td, *J* = 6.7, 2.5 Hz, 3H), 2.45 (ddt,

$J = 18.5, 10.7, 2.7$  Hz, 1H), 2.31 (t,  $J = 2.7$  Hz, 1H), 2.11 – 2.03 (m, 2H), 1.99 (dd,  $J = 13.3, 8.1$  Hz, 1H), 1.94 – 1.87 (m, 2H), 1.79 (d,  $J = 1.3$  Hz, 2H), 1.78 – 1.74 (m, 1H), 1.71 (s, 2H), 1.69 (dt,  $J = 6.5, 1.5$  Hz, 3H), 1.65 – 1.53 (m, 6H), 1.43 (d,  $J = 14.3$  Hz, 1H), 0.98 (d,  $J = 6.8$  Hz, 3H), 0.95 (d,  $J = 6.9$  Hz, 3H), 0.94 (d,  $J = 6.6$  Hz, 3H), 0.90 (t,  $J = 7.1$  Hz, 0H), 0.84 (d,  $J = 7.2$  Hz, 3H).  **$^{13}\text{C-NMR}$**  (176 MHz, MeOD- $d^4$ )  $\delta$  [ppm]:  $^{13}\text{C NMR}$  (176 MHz, MeOD)  $\delta$  174.33, 172.24, 166.71, 162.31, 158.58, 158.30, 147.99, 139.98, 139.32, 138.01, 134.36, 131.81, 131.25, 130.90, 129.51, 128.92, 127.27, 127.08, 126.87, 126.24, 123.27, 121.51, 121.09, 81.09, 80.04, 75.72, 71.07, 70.91, 67.06, 64.21, 62.15, 58.17, 54.94, 40.39, 31.92, 31.56, 30.92, 30.74, 30.46, 30.09, 29.53, 27.84, 21.72, 21.42, 20.60, 19.98, 19.77, 18.59, 18.07, 17.05, 11.55. **LRMS** (ESI-Quad) [m/z]: 958.2 [M+H]<sup>+</sup>, **HRMS** (ESI-IT) [m/z]: 957.532547, calculated 957.533184 for C<sub>52</sub>H<sub>72</sub>N<sub>6</sub>O<sub>11</sub> [M+H]<sup>+</sup>, err [ppm] 0.662.

Synthesis of 16-Aminoratjadones bearing terminal alkynes and cyclooctynes attached via intracellular cleavable disulfide linker

**Synthesis of 2-PySS(CH<sub>2</sub>)<sub>2</sub>(CO)-16R-Aminoratjadone (31)** – N-((1R,2E,4E,7R,8Z,10E)-1-((2S,4R,5S,6S)-4-Hydroxy-5-methyl-6-((E)-prop-1-en-1-yl)tetrahydro-2H-pyran-2-yl)-5,7,9-trimethyl-11-((R)-6-oxo-3,6-dihydro-2H-pyran-2-yl)undeca-2,4,8,10-tetraen-1-yl)-3-(pyridin-2-yl)disulfaneyl)propanamide

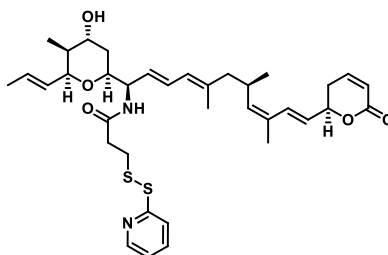

Chemical Formula: C<sub>36</sub>H<sub>48</sub>N<sub>2</sub>O<sub>5</sub>S<sub>2</sub>  
Molecular Weight: 652.91  
2-PySS(CH<sub>2</sub>)<sub>2</sub>(CO)-16R-Aminoratjadone 31

To a solution of 2.4 mg (4.215 μmol, 1.0 equiv) 16R-aminoratjadone **16** in 126 μL of a 1:2 mixture of MeCN and PBS (100 mM, pH = 7.45) was added 1.5 mg (4.64 μmol, 1.1 equiv) 3-(2-Pyridyldithio)propionic acid *N*-hydroxysuccinimide ester **32** and the mixture was stirred for 3.5 h at 23°C, before it was diluted with 1 mL H<sub>2</sub>O and extracted with CH<sub>2</sub>Cl<sub>2</sub> (3x 1.5 mL). The combined organic layers were dried over Na<sub>2</sub>SO<sub>4</sub> and concentrated under reduced pressure. The residue was purified by preparative thin-layer chromatography (CH<sub>2</sub>Cl<sub>2</sub>:MeOH /95:5), yielding 2.7 mg (4.135 μmol, 98%) of 2-PySS(CH<sub>2</sub>)<sub>2</sub>(CO)-16R-Aminoratjadone **31** as an amorph, white solid.

**2-PySS(CH<sub>2</sub>)<sub>2</sub>(CO)-16R -Aminoratjadone (31):** TLC (CH<sub>2</sub>Cl<sub>2</sub>:MeOH/95:5) R<sub>f</sub>: 0.22 [UV<sup>254</sup>, CAM], <sup>1</sup>H-NMR (500 MHz, benzene-*d*<sub>6</sub>) δ [ppm] 8.33 (ddd, *J* = 4.8, 1.8, 0.9 Hz, 1H), 7.42 (d, *J* = 8.1 Hz, 1H), 6.98 (ddd, *J* = 8.1, 7.5, 1.9 Hz, 1H), 6.83 (d, *J* = 9.1 Hz, 1H), 6.72 (ddd, *J* = 15.2, 10.9, 1.0 Hz, 1H), 6.64 (d, *J* = 15.6 Hz, 1H), 6.48 (ddd, *J* = 7.4, 4.8, 1.0 Hz, 1H), 5.99 (dd, *J* = 15.2, 7.3 Hz, 1H), 5.94 – 5.88 (m, 2H), 5.80 (ddd, *J* = 9.8, 2.5, 1.0 Hz, 1H), 5.73 – 5.62 (m, 1H), 5.52 – 5.42 (m, 2H), 5.12 (d, *J* = 9.7 Hz, 1H), 4.90 (td, *J* = 8.0, 4.1 Hz, 1H), 4.56 (d, *J* = 5.8 Hz, 1H), 4.45 – 4.36 (m, 1H), 4.07 (ddd, *J* = 12.3, 3.9, 2.4 Hz, 1H), 3.57 (d, *J* = 2.7 Hz, 1H), 2.92 (t, *J* = 6.6 Hz, 2H), 2.84 – 2.71 (m, 2H), 2.27 (td, *J* = 6.6, 3.2 Hz, 2H), 1.98 – 1.85 (m, 2H), 1.68 (d, *J* = 1.1 Hz, 3H), 1.68 – 1.67 (m, 3H), 1.57 (dt, *J* = 6.5, 1.2 Hz, 3H), 1.56 – 1.53 (m, 1H), 1.52 – 1.48 (m, 2H), 1.26 (d, *J* = 14.1 Hz, 2H), 0.91 (d, *J* = 6.6 Hz, 3H), 0.82 (d, *J* = 7.2 Hz, 3H). <sup>13</sup>C-NMR (126 MHz, benzene-*d*<sub>6</sub>) δ [ppm]: 169.79, 163.67, 161.09, 150.27, 144.23, 139.44, 137.10, 136.84, 131.75, 130.88, 130.33, 129.96, 127.34, 126.61, 126.20, 122.12, 120.86, 120.07, 78.44, 75.42, 75.28, 70.47, 55.59, 48.34, 40.07, 36.19, 35.80, 31.38, 31.18,

30.57, 30.19, 21.77, 20.86, 18.35, 17.66, 11.76. **LRMS** (ESI-Quad) [m/z]: 653.9 [M+H]<sup>+</sup>, **HRMS** (ESI-IT) [m/z]: 653.3077, calculated 653.3077 for C<sub>36</sub>H<sub>48</sub>N<sub>2</sub>O<sub>5</sub>S<sub>2</sub> [M+H]<sup>+</sup>, err [ppm] 0.0.

### Synthesis of 2-PySS(CH<sub>2</sub>)<sub>2</sub>NH<sub>2</sub> – 2-(pyridin-2-yldisulfaneyl)ethan-1-amine hydrochloride<sup>vi</sup>

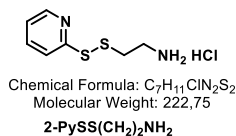

To a solution of 1.0 g (8.802 mmol, 1.0 equiv) 2-aminothioethanol hydrochloride in 5.3 mL of degassed dry MeOH under Argon atm. was added a solution of 5.0 g (22.695 mmol, 2.5 equiv) 2,2'-dipyridyl disulfide in 10.6 mL of degassed dry MeOH over a period of 1 h at 23°C using a syringe pump. The resulting mixture was stirred for 24 h at 23°C. Upon addition of ice-cold Et<sub>2</sub>O (300 mL) to the mixture a white precipitate was formed, which was collected, washed with ice-cold Et<sub>2</sub>O and dried in HV yielding 1.478 g (6.634 mmol, 75%) of **36** as a white solid.

**2-PySS(CH<sub>2</sub>)<sub>2</sub>NH<sub>2</sub>**: <sup>1</sup>H-NMR (700 MHz, MeOD-*d*<sub>4</sub>) 8.54 (ddd, *J* = 4.9, 1.8, 0.9 Hz, 1H), 7.95 – 7.72 (m, 1H), 7.65 (dt, *J* = 8.1, 0.9 Hz, 1H), 7.31 (ddd, *J* = 7.4, 4.9, 1.0 Hz, 1H), 3.30 (t, *J* = 6.2 Hz, 2H), 3.14 (t, *J* = 6.2 Hz, 2H). δ [ppm] <sup>13</sup>C-NMR (176 MHz, MeOD-*d*<sub>4</sub>) δ [ppm]: 159.48, 150.91, 139.14, 123.30, 122.86, 38.72, 36.85. **LRMS** (ESI-Quad) [m/z]: 187.3 [M+H]<sup>+</sup>.

### Synthesis of 2-PySS(CH<sub>2</sub>)<sub>2</sub>NH-(CO)(CH<sub>2</sub>)<sub>2</sub>CCH – N-(2-(pyridin-2-yldisulfaneyl)ethyl)pent-4-ynamide

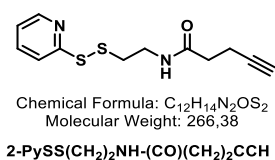

To a solution of 300 mg (1.537 μmol, 1.0 equiv) 4-pentynoic acid N-hydroxysuccinimid ester<sup>7</sup> in 15.4 mL dry CH<sub>2</sub>Cl<sub>2</sub> were added 803 μL (4.611 mmol, 3.0 equiv) DiPEA and 342 mg (1.537 mmol, 1.0 equiv) **2-PySS(CH<sub>2</sub>)<sub>2</sub>NH<sub>2</sub>** and the mixture was stirred for 7 h at 23°C, before it was concentrated under reduced pressure and the resulting residue was purified by flash-chromatography through silicagel (EtOac: MeOH/30:1 – 15:1 – 10:1) yielding 271.4 mg (1.019 mmol, 66%) **2-PySS(CH<sub>2</sub>)<sub>2</sub>NH-(CO)(CH<sub>2</sub>)<sub>2</sub>CCH** as a pale yellow, amorph solid.

<sup>vi</sup> Synthesis was based on a procedure of *Vu et al.*<sup>18</sup>

**2-PySS(CH<sub>2</sub>)<sub>2</sub>NH-(CO)(CH<sub>2</sub>)<sub>2</sub>CCH**: TLC (EtOAc:MeOH/9:1) R<sub>f</sub>: 0.77 [UV<sup>254</sup>, CAM], <sup>1</sup>H-NMR (500 MHz, CDCl<sub>3</sub>) δ [ppm] 8.54 – 8.44 (m, 1H), 7.60 (td, *J* = 7.9, 1.8 Hz, 1H), 7.49 (dt, *J* = 8.1, 0.9 Hz, 1H), 7.13 (ddd, *J* = 7.3, 4.9, 0.8 Hz, 1H), 3.56 (q, *J* = 5.9 Hz, 2H), 2.95 – 2.86 (m, 2H), 2.53 (tdd, *J* = 7.2, 2.6, 0.9 Hz, 2H), 2.45 – 2.38 (m, 2H), 1.98 (t, *J* = 2.6 Hz, 1H). <sup>13</sup>C-NMR (126 MHz, CDCl<sub>3</sub>) δ [ppm]: 171.00, 159.25, 149.95, 137.12, 121.51, 121.36, 83.13, 69.42, 39.10, 37.40, 35.68, 15.07. LRMS (ESI-Quad) [m/z]: 267.4 [M+H]<sup>+</sup>, HRMS (ESI-IT) [m/z]: 267.062375, calculated 267.062032 for C<sub>12</sub>H<sub>15</sub>N<sub>2</sub>OS<sub>2</sub> [M+H]<sup>+</sup>, err [ppm] -1.287.

**Synthesis of HO<sub>2</sub>C(CH<sub>2</sub>)<sub>2</sub>SS(CH<sub>2</sub>)<sub>2</sub>NH-(CO)(CH<sub>2</sub>)<sub>2</sub>CCH (30) – 3-((2-(pent-4-ynamido)ethyl)-disulfaneyl)propanoic acid**

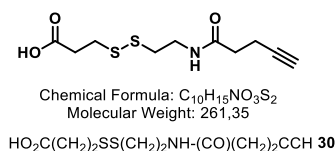

To a solution of 50 mg (0.1877 mmol, 1.0 equiv) **2-PySS(CH<sub>2</sub>)<sub>2</sub>NH-(CO)(CH<sub>2</sub>)<sub>2</sub>CCH** in 3.75 mL dry MeOH under Argon atm. was added 16.4 μL (0.1877 mmol, 1.0 equiv) 3-mercaptopropanoic acid and the mixture was stirred for 19 h at 23°C. The solvent was removed under reduced pressure and the residue was dissolved in 400 μL MeOH and purified by preparative HPLC (Phenomenex Gemini C18 RP-column 00G-4435-PO-AX, 5 μm, 110 Å, 250×21.20 mm (9 mL/min), ACN:H<sub>2</sub>O + TFA/ 5:95 + 0.1% → 95:5 + 0.1% in 15 min) yielding after lyophilization 37.3 mg (0.1427 mmol, 76%) HO<sub>2</sub>C(CH<sub>2</sub>)<sub>2</sub>SS(CH<sub>2</sub>)<sub>2</sub>NH-(CO)(CH<sub>2</sub>)<sub>2</sub>CCH **30** as a white, amorphous solid.

**HO<sub>2</sub>C(CH<sub>2</sub>)<sub>2</sub>SS(CH<sub>2</sub>)<sub>2</sub>NH-(CO)(CH<sub>2</sub>)<sub>2</sub>CCH (30)**: TLC (EtOAc:MeOH/98:2 + 1% HOAc) R<sub>f</sub>: 0.65 [CAM], <sup>1</sup>H-NMR (500 MHz, MeOH-*d*<sub>4</sub>) 3.49 (t, *J* = 6.7 Hz, 2H), 2.93 (t, *J* = 7.1 Hz, 2H), 2.82 (t, *J* = 6.7 Hz, 2H), 2.69 (t, *J* = 7.1 Hz, 2H), 2.49 – 2.44 (m, 2H), 2.41 – 2.36 (m, 2H), 2.26 (t, *J* = 2.6 Hz, 1H). LRMS (ESI-Quad) [m/z]: 262.4 [M+H]<sup>+</sup>, HRMS (ESI-IT) [m/z]: 262.056032, calculated 262.056612 for C<sub>10</sub>H<sub>16</sub>NO<sub>3</sub>S<sub>2</sub> [M+H]<sup>+</sup>, err [ppm] 2.213.

**Synthesis of HCC(CH<sub>2</sub>)<sub>2</sub>(CO)-NH-(CH<sub>2</sub>)<sub>2</sub>SS(CH<sub>2</sub>)<sub>2</sub>(CO)-16R-Aminoratjadone (29) – N-(2-((3-(((1R,2E,4E,7R,8Z,10E)-1-((2S,4R,5S,6S)-4-hydroxy-5-methyl-6-((E)-prop-1-en-1-yl)tetrahydro-2H-pyran-2-yl)-5,7,9-trimethyl-11-((R)-6-oxo-3,6-dihydro-2H-pyran-2-yl)undeca-2,4,8,10-tetraen-1-yl)amino)-3-oxopropyl)disulfaneyl)-ethyl)pent-4-ynamide**

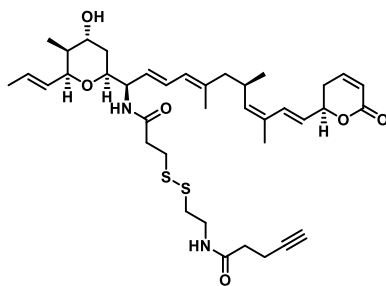

Chemical Formula:  $C_{38}H_{54}N_2O_6S_2$   
Molecular Weight: 698.98

HCC(CH<sub>2</sub>)<sub>2</sub>(CO)-NH-(CH<sub>2</sub>)<sub>2</sub>SS(CH<sub>2</sub>)<sub>2</sub>(CO)-16R-Aminoratjadone **29**

To a solution of 6.9 mg (26.346  $\mu$ mol, 1.0 equiv) **HO<sub>2</sub>C(CH<sub>2</sub>)<sub>2</sub>SS(CH<sub>2</sub>)<sub>2</sub>NH-(CO)(CH<sub>2</sub>)<sub>2</sub>CCH** in 131  $\mu$ L dry DMF were added 14.5  $\mu$ L (131.73  $\mu$ mol, 5.0 equiv) NMM and 7.9 mg (26.346  $\mu$ mol, 1.0 equiv) TSTU. The resulting mixture was stirred at 23°C for 30 min, before a solution of 12.0 mg (26.346  $\mu$ mol, 1.0 equiv) 16R-aminoratjadone **16** in 131  $\mu$ L dry DMF was added and the mixture was stirred for 16 h at 23°C. The mixture was poured into 20 mL H<sub>2</sub>O and extracted with CH<sub>2</sub>Cl<sub>2</sub> (3x 10 mL). The combined organic layers were dried over Na<sub>2</sub>SO<sub>4</sub> and concentrated under reduced pressure. The residue was purified by preparative thin-layer chromatography (CH<sub>2</sub>Cl<sub>2</sub>:MeOH/98:2) yielding 12.0 mg (17.12  $\mu$ mol, 65%) of **29** as a pale yellow, amorph solid.

**HCC(CH<sub>2</sub>)<sub>2</sub>(CO)-NH-(CH<sub>2</sub>)<sub>2</sub>SS(CH<sub>2</sub>)<sub>2</sub>(CO)-16R-Aminoratjadone (29):** TLC (CH<sub>2</sub>Cl<sub>2</sub>:MeOH/95:5) R<sub>f</sub>: 0.69 [UV<sup>254</sup>, CAM], <sup>1</sup>H-NMR (700 MHz, benzene-*d*<sub>6</sub>)  $\delta$  [ppm] 6.90 (d, *J* = 9.0 Hz, 1H), 6.72 – 6.68 (m, 1H), 6.66 (d, *J* = 15.5 Hz, 1H), 6.42 (t, *J* = 5.9 Hz, 1H), 6.04 (dd, *J* = 15.2, 7.2 Hz, 1H), 5.95 (ddd, *J* = 9.8, 5.7, 2.7 Hz, 1H), 5.93 – 5.90 (m, 1H), 5.80 (ddd, *J* = 9.7, 2.6, 1.1 Hz, 1H), 5.77 (ddd, *J* = 15.4, 6.5, 1.5 Hz, 1H), 5.53 – 5.51 (m, 1H), 5.50 – 5.46 (m, 1H), 5.13 (dd, *J* = 9.9, 1.5 Hz, 1H), 4.90 (dddd, *J* = 8.8, 7.2, 4.5, 1.2 Hz, 1H), 4.64 (ddd, *J* = 5.7, 2.8, 1.5 Hz, 1H), 4.43 (dddd, *J* = 11.2, 7.2, 4.2, 1.1 Hz, 1H), 4.14 (ddd, *J* = 12.2, 4.7, 2.4 Hz, 1H), 3.75 (d, *J* = 2.9 Hz, 1H), 3.50 (dq, *J* = 13.9, 6.1 Hz, 1H), 3.46 – 3.40 (m, 1H), 2.95 – 2.85 (m, 2H), 2.82 (td, *J* = 9.1, 4.5 Hz, 1H), 2.72 – 2.63 (m, 2H), 2.53 – 2.44 (m, 3H), 2.41 – 2.31 (m, 2H), 2.27 – 2.22 (m, 2H), 1.98 (dd, *J* = 14.0, 5.5 Hz, 1H), 1.92 (dd, *J* = 14.0, 8.6 Hz, 1H), 1.86 (t, *J* = 2.7 Hz, 1H), 1.81 – 1.72 (m, 2H), 1.72 (d, *J* = 1.3 Hz, 3H), 1.71 (d, *J* = 1.3 Hz, 3H), 1.61 (dt, *J* = 6.5, 1.5 Hz, 3H), 1.58 – 1.54 (m, 2H), 1.52 – 1.48 (m, 1H), 0.93 (d, *J* = 6.6 Hz, 3H), 0.87 (d, *J* = 7.2 Hz, 3H). <sup>13</sup>C-NMR (176 MHz, benzene-*d*<sub>6</sub>)  $\delta$  [ppm]: 171.08, 170.35, 163.75, 144.34, 139.48, 136.41, 131.59, 131.34, 129.93, 129.30, 128.69, 126.89, 126.04, 125.66, 121.63, 83.71, 78.54, 74.99, 74.95, 70.17, 69.60, 55.47, 47.93, 39.75, 38.90, 38.72, 36.61, 35.32, 35.07, 31.17, 30.84, 29.79, 21.59, 20.53, 18.06, 17.41, 15.18, 11.49. **LRMS** (ESI-Quad) [m/z]: 699.9 [M+H]<sup>+</sup>, **HRMS** (ESI-IT) [m/z]: 699.3490, calculated 699.3496 for C<sub>38</sub>H<sub>54</sub>N<sub>2</sub>O<sub>6</sub>S<sub>2</sub> [M+H]<sup>+</sup>, err [ppm] -0.857.



## Synthesis of 19-Aminoratjadones with bearing terminal alkynes attached via short non-cleavable linkers

**Synthesis of 19-Aminoratjadone (33)** - (6R)-6-((1E,3Z,5R,7E,9E,11R)-11-((2S,5S,6S)-4-amino-5-methyl-6-((E)-prop-1-en-1-yl)tetrahydro-2H-pyran-2-yl)-11-hydroxy-3,5,7-trimethylundeca-1,3,7,9-tetraen-1-yl)-5,6-dihydro-2H-pyran-2-one

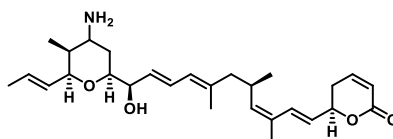

Chemical Formula: C<sub>28</sub>H<sub>41</sub>NO<sub>4</sub>  
Molecular Weight: 455.64  
19-Aminoratjadone **33**

2.9 mg (39.595 μmol, 2.0 equiv) ammonium acetate were added to a solution of 9.0 mg (19.797 μmol, 1.0 equiv) 19-oxoratjadone **14** in 396 μL dry MeOH at 23°C and stirred for 15 min, before 2.5 mg (39.595 μmol, 2.0 equiv) sodium cyanoborohydride was added and the mixture was stirred at 23°C for 4 h, before the reaction was quenched by addition of 200 μL of ACN:H<sub>2</sub>O + TFA/30:70 + 0.05%. This mixture was directly purified by RP prep HPLC (Phenomenex Gemini C18 RP-column 00G-4435-PO-AX, 5 μm, 110 A, 250×21.20 mm, Flow: 9 mL/min, ACN:H<sub>2</sub>O + TFA/ 10:90 + 0.1% → 95:5 + 0.1% in 90 min) yielding after lyophilization 6.9 mg (15.1 μmol, 68%) 19-aminoratjadone **33** as an inseparable 1:2 mixture of 2 diastereoisomers as a pale-yellow solid foam.

**19-Aminoratjadone (33):** <sup>1</sup>H-NMR (700 MHz, CDCl<sub>3</sub>) δ [ppm]: 8.21 (s, 1H), 8.04 (s, 2H), 6.95 – 6.87 (m, 1H), 6.70 – 6.54 (m, 1H), 6.48 – 6.39 (m, 1H), 6.05 – 5.97 (m, 1H), 5.77 – 5.62 (m, 3H), 5.54 – 5.29 (m, 2H), 5.19 (dd, *J* = 20.5, 9.7 Hz, 1H), 4.99 – 4.90 (m, 1H), 4.38 – 4.12 (m, 1H), 3.95 (dd, *J* = 8.0, 2.5 Hz, 1H), 3.48 (s, 1H), 3.46 – 3.39 (m, 1H), 2.82 – 2.69 (m, 1H), 2.51 – 2.40 (m, 4H), 2.09 – 1.84 (m, 3H), 1.77 (dd, *J* = 3.5, 1.0 Hz, 3H), 1.72 – 1.68 (m, 6H), 1.68 – 1.65 (m, 2H), 0.99 – 0.89 (m, 6H). <sup>13</sup>C-NMR (176 MHz, CDCl<sub>3</sub>) δ [ppm]: 165.49, 165.10, 165.03, 165.00, 162.32, 162.12, 146.02, 145.72, 145.58, 139.72, 139.67, 139.60, 139.40, 138.13, 137.76, 137.70, 137.49, 131.82, 131.71, 131.57, 131.52, 131.08, 129.78, 129.57, 129.54, 129.50, 129.48, 129.32, 129.27, 129.16, 128.85, 128.76, 128.68, 128.15, 128.06, 127.94, 127.67, 127.52, 125.90, 125.87, 125.69, 125.06, 124.97, 121.51, 121.43, 121.32, 83.16, 80.01, 79.66, 79.52, 79.48, 79.45, 78.54, 78.09, 77.97, 74.41, 74.37, 74.24, 74.09, 74.04, 73.74, 73.33, 54.45, 53.57, 52.11, 51.70, 50.95, 47.72, 47.68, 47.64, 47.58, 39.41, 36.77, 35.62, 35.37, 30.99, 30.94, 30.85, 30.41, 30.26, 30.18, 29.99, 29.63, 24.08, 23.90, 21.65, 21.45, 20.48, 20.45, 18.02, 17.98, 17.62, 17.60, 13.37, 13.28, 11.99, 5.43. **LRMS** (ESI-Quad) [m/z]: 456.3 [M+H]<sup>+</sup>, **HRMS** (ESI-IT) [m/z]: 456.310615, calculated 456.310835 for C<sub>28</sub>H<sub>42</sub>NO<sub>4</sub> [M+H]<sup>+</sup>, err [ppm] – 0.043.

**Synthesis of Compound 34** - But-3-yn-1-yl ((2S,3S,6S)-6-((1R,2E,4E,7R,8Z,10E)-1-hydroxy-5,7,9-trimethyl-11-((R)-6-oxo-3,6-dihydro-2H-pyran-2-yl)undeca-2,4,8,10-tetraen-1-yl)-3-methyl-2-((E)-prop-1-en-1-yl)tetrahydro-2H-pyran-4-yl)carbamate

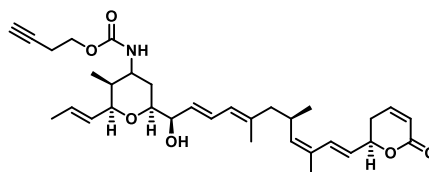

Chemical Formula: C<sub>33</sub>H<sub>45</sub>NO<sub>6</sub>  
Molecular Weight: 551.72

34

To a solution of 4.0 mg (7.02 μmol, 1.0 equiv) 19-aminoratjadone **33** in 70 μL dry CH<sub>2</sub>Cl<sub>2</sub> were added 2.31 μL (21.06 μmol, 6.0 equiv) NMM and 1.82 mg (7.72 μmol, 1.1 equiv) but-3-yn-1-yl (4-nitrophenyl) carbonate **24** and the mixture was stirred for 36 h at 23°C. The mixture was diluted with 0.25 mL CH<sub>2</sub>Cl<sub>2</sub> and directly purified by preparative thin-layer chromatography (CH<sub>2</sub>Cl<sub>2</sub>:MeOH/98:2, 1x Development), yielding 2.4 mg (4.35 μmol, 65%) of Compound **34** as a mixture of C-19 diastereomers as a pale-yellow solid foam.

**Compound 34:** TLC (CH<sub>2</sub>Cl<sub>2</sub>:MeOH/98:2) R<sub>f</sub>: 0.21 [UV<sup>254</sup>, CAM], <sup>1</sup>H-NMR (700 MHz, CDCl<sub>3</sub>) δ [ppm] 6.95 – 6.83 (m, 1H), 6.71 (t, *J* = 15.3 Hz, 1H), 6.47 (ddd, *J* = 15.2, 11.0, 1.5 Hz, 1H), 6.07 (ddt, *J* = 9.7, 3.6, 1.9 Hz, 1H), 5.81 – 5.74 (m, 1H), 5.73 – 5.65 (m, 2H), 5.52 (ddd, *J* = 15.5, 10.6, 6.6 Hz, 1H), 5.48 – 5.39 (m, 1H), 5.23 (d, *J* = 9.7 Hz, 1H), 5.02 – 4.97 (m, 1H), 4.31 (d, *J* = 29.2 Hz, 1H), 4.22 – 3.98 (m, 3H), 3.94 – 3.73 (m, 1H), 3.64 – 3.49 (m, 1H), 2.81 (dq, *J* = 14.2, 7.0 Hz, 1H), 2.54 – 2.46 (m, 4H), 2.41 – 2.29 (m, 1H), 2.03 – 1.98 (m, 3H), 1.79 (s, 3H), 1.72 (d, *J* = 2.4 Hz, 3H), 1.71 (d, *J* = 6.5 Hz, 3H), 1.54 – 1.49 (m, 2H), 0.93 (dd, *J* = 6.6, 2.3 Hz, 3H), 0.81 (d, *J* = 7.0 Hz, 3H). <sup>13</sup>C-NMR (176 MHz, CDCl<sub>3</sub>) δ [ppm] 164.24, 164.19, 155.35, 144.84, 144.82, 139.43, 138.01, 137.85, 130.95, 130.78, 129.82, 129.71, 129.46, 128.76, 128.14, 128.07, 127.28, 126.00, 125.91, 125.49, 125.42, 121.83, 121.82, 80.02, 79.09, 78.87, 78.82, 75.72, 75.61, 74.59, 74.23, 69.93, 69.89, 62.65, 51.37, 47.99, 47.91, 36.83, 32.08, 30.60, 30.56, 30.24, 30.19, 29.86, 29.84, 29.82, 29.82, 29.80, 29.75, 29.60, 29.52, 29.40, 29.23, 25.58, 24.49, 22.85, 21.17, 21.13, 20.53, 19.56, 18.04, 17.21, 17.16, 14.28, 12.08, 6.12. LRMS (ESI-Quad) [*m/z*]: 552.9 [M+H]<sup>+</sup>, HRMS (ESI-IT) [*m/z*]: 574.312547, calculated 574.313909 for C<sub>33</sub>H<sub>45</sub>NNaO<sub>6</sub> [M+Na]<sup>+</sup>, err [ppm] 1.675.

**Synthesis of N-Propargyl-19-aminoratjadone (35)** - (6R)-6-((1E,3Z,5R,7E,9E,11R)-11-hydroxy-3,5,7-trimethyl-11-((2S,5S,6S)-5-methyl-6-((E)-prop-1-en-1-yl)-4-(prop-2-yn-1-ylamino)tetrahydro-2H-pyran-2-yl)undeca-1,3,7,9-tetraen-1-yl)-5,6-dihydro-2H-pyran-2-one

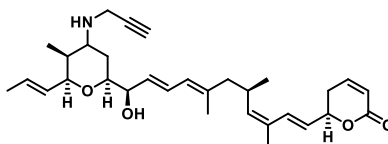

Chemical Formula: C<sub>31</sub>H<sub>43</sub>NO<sub>4</sub>  
 Molecular Weight: 493,6880  
 N-Propargyl-19-aminoratjadone **35**

2.54  $\mu$ L (39.595  $\mu$ mol, 2.0 equiv) propargylamine and 2.2  $\mu$ L (39.595  $\mu$ mol, 2.0 equiv) acetic acid were added to a solution of 9.0 mg (19.797  $\mu$ mol, 1.0 equiv) 19-oxoratjadone **9** in 396  $\mu$ L dry MeOH at 23°C and stirred for 15 min, before 2.5 mg (39.595  $\mu$ mol, 2.0 equiv) sodium cyanoborohydride was added and the mixture was stirred at 23°C for 4 h, before the reaction was quenched by addition of 200  $\mu$ L of ACN:H<sub>2</sub>O + TFA/30:70 + 0.05%. This mixture was directly purified by RP prep HPLC (Phenomenex Gemini C18 RP-column 00G-4435-PO-AX, 5  $\mu$ m, 110 A, 250×21.20 mm, Flow: 9 mL/min, ACN:H<sub>2</sub>O + TFA/ 10:90 + 0.1% → 95:5 + 0.1% in 90 min) yielding after lyophilization 9.7 mg (19.648  $\mu$ mol, 99%) *N*-Propargyl-19-aminoratjadone **35** as an inseparable 1:2 mixture of 2 diastereoisomers in its TFA salts as a pale-yellow solid foam.

**N-Propargyl-19-aminoratjadone (35):** <sup>1</sup>H-NMR (500 MHz, CDCl<sub>3</sub>)  $\delta$  [ppm]: 6.95 – 6.88 (m, 1H), 6.73 – 6.58 (m, 1H), 6.54 – 6.44 (m, 1H), 6.08 – 6.03 (m, 1H), 5.81 – 5.66 (m, 3H), 5.58 – 5.31 (m, 2H), 5.28 – 5.16 (m, 1H), 4.98 (dddd,  $J$  = 15.3, 11.7, 7.4, 4.7 Hz, 1H), 4.34 (ddt,  $J$  = 33.7, 10.0, 5.3 Hz, 1H), 4.04 – 3.63 (m, 6H), 3.50 (ddt,  $J$  = 13.8, 9.9, 5.5 Hz, 1H), 2.78 (tt,  $J$  = 17.7, 8.7 Hz, 1H), 2.54 – 2.44 (m, 3H), 2.17 – 2.05 (m, 1H), 2.00 (td,  $J$  = 13.1, 12.0, 6.4 Hz, 2H), 1.94 – 1.83 (m, 1H), 1.79 – 1.78 (m, 3H), 1.74 – 1.71 (m, 6H), 1.71 – 1.67 (m, 2H), 1.06 – 0.92 (m, 6H). <sup>13</sup>C-NMR (126 MHz, CDCl<sub>3</sub>)  $\delta$  [ppm]: 165.16, 164.64, 164.62, 164.49, 162.69, 162.49, 162.28, 162.08, 145.67, 145.20, 145.17, 145.13, 139.53, 139.46, 139.43, 138.27, 137.82, 137.71, 137.67, 131.63, 131.46, 131.35, 131.24, 131.17, 129.68, 129.53, 129.46, 129.38, 129.27, 129.19, 128.82, 128.77, 128.68, 128.54, 128.49, 128.48, 128.30, 128.20, 127.88, 127.82, 127.49, 125.99, 125.90, 125.81, 125.30, 125.27, 125.11, 121.67, 121.65, 121.43, 118.95, 117.29, 115.64, 113.98, 83.23, 79.74, 79.52, 79.15, 79.11, 78.59, 77.95, 77.86, 77.67, 77.63, 77.55, 74.64, 74.58, 73.97, 73.89, 73.70, 73.64, 73.61, 73.32, 73.25, 73.15, 73.12, 59.19, 57.97, 57.26, 56.71, 53.57, 47.87, 47.83, 47.80, 38.58, 37.67, 36.00, 35.46, 34.40, 34.26, 33.74, 33.68, 30.76, 30.74, 30.72, 30.70, 30.32, 30.21, 30.19, 29.85, 26.95, 26.50, 22.38, 21.56, 21.51, 21.28, 21.23, 20.50, 20.49, 18.01, 17.98, 17.41, 17.31, 17.29, 13.63, 13.44, 12.04, 5.86, 1.17. **LRMS** (ESI-Quad) [m/z]: 494.7 [M+H]<sup>+</sup>, **HRMS** (ESI-IT) [m/z]: 494.3268, calculated 494.3265 for C<sub>31</sub>H<sub>44</sub>NO<sub>4</sub> [M+H]<sup>+</sup>, err [ppm] – 0.6.

Synthesis of appropriate carrier molecules

Synthesis of Folate derivatives in solution

### Synthesis of methyl N<sup>2</sup>-(((9H-fluoren-9-yl)methoxy)carbonyl)-N<sup>6</sup>-(tert-butoxycarbonyl)-L-lysinate (**37**)

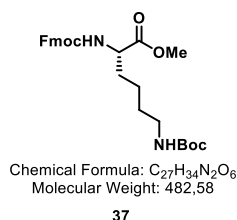

To a solution of 1.0 g (2.134 mmol, 1.0 equiv) N<sup>2</sup>-(((9H-fluoren-9-yl)methoxy)carbonyl)-N<sup>6</sup>-(tert-butoxycarbonyl)-L-lysine in 10.7 mL dry DMF were added 590 mg (4.268 mmol, 2.0 equiv) K<sub>2</sub>CO<sub>3</sub> and 200 μL (3.201 mmol, 1.5 equiv) methyl iodide and the mixture was stirred for 3.5 h at 23°C. The reaction was diluted with Et<sub>2</sub>O (30 mL) and the mixture was washed with saturated aqueous NH<sub>4</sub>Cl solution (2x 150 mL) and H<sub>2</sub>O (2x 50 mL). The organic layer was dried over Na<sub>2</sub>SO<sub>4</sub>, concentrated under reduced pressure and dried in HV yielding 885 mg (1.835 mmol, 86%) of **37** as pale-yellow solid.

**N<sup>2</sup>-(((9H-fluoren-9-yl)methoxy)carbonyl)-N<sup>6</sup>-(tert-butoxycarbonyl)-L-lysinate (37):** **TLC** (CH<sub>2</sub>Cl<sub>2</sub>:MeOH/95:5) R<sub>f</sub>: 0.90 [UV<sup>254</sup>], **IR** (ATR) [cm<sup>-1</sup>]: 3343, 2976, 2951, 2932, 2866, 1653, 1609, 1510, 1478, 1450, 1392, 1366, 1341, 1248, 1211, 1166, 1106, 1081, 1044, 1005, 909, 865, 780, 755, 728, 674, 646, 621. **<sup>1</sup>H-NMR** (700 MHz, CDCl<sub>3</sub>) δ [ppm]: 7.74 (d, *J* = 7.4 Hz, 2H), 7.62 – 7.55 (m, 2H), 7.38 (t, *J* = 7.2 Hz, 2H), 7.29 (t, *J* = 6.9 Hz, 2H), 5.42 (s, 1H), 4.58 (s, 1H), 4.38 (dt, *J* = 17.8, 8.6 Hz, 3H), 4.20 (t, *J* = 6.5 Hz, 1H), 3.73 (s, 3H), 3.09 (s, 2H), 1.83 (s, 1H), 1.68 (s, 1H), 1.41 (s, 9H), 1.52 – 1.29 (m, 5H). **<sup>13</sup>C-NMR** (176 MHz, CDCl<sub>3</sub>) δ [ppm]: 173.04, 156.18, 156.09, 144.00, 143.85, 141.40, 127.80, 127.17, 125.20, 120.08, 79.26, 67.10, 53.82, 52.52, 47.27, 40.15, 32.22, 29.70, 28.53, 22.47. **LRMS** (ESI-Quad) [m/z]: 483.2 [M+H]<sup>+</sup>, **HRMS** (ESI-IT) [m/z]: 483.2493, calculated 483.2490 for C<sub>27</sub>H<sub>34</sub>N<sub>2</sub>O<sub>6</sub> [M+H]<sup>+</sup>, err [ppm] -0.600.

**Synthesis of methyl N<sup>2</sup>-((S)-4-(((9H-fluoren-9-yl)methoxy)carbonyl)amino)-5-(tert-butoxy)-5-oxopentanoyl)-N<sup>6</sup>-(tert-butoxycarbonyl)-L-lysinate (**38**)**

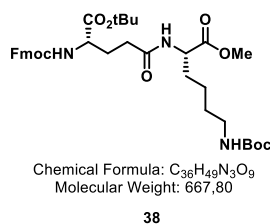

To a solution of 100 mg (0.207 mmol, 1.2 equiv) methyl N<sup>2</sup>-(((9H-fluoren-9-yl)methoxy)carbonyl)-N<sup>6</sup>-(tert-butoxycarbonyl)-L-lysinate **37** in 4.1 mL CH<sub>2</sub>Cl<sub>2</sub> was added 332 μL (1.6 mL/mmol) piperidine and the mixture was stirred for 3 h at 23°C until the starting material was consumed. The mixture was diluted with toluene (10 mL), concentrated and co-evaporated with toluene (3x 10 mL) under reduced pressure. The residue containing the free amine was dissolved in 1.2 mL dry DMF and 57 mL (0.517 mmol, 3.0 equiv) NMM, 74 mg (0.1725 mmol, 1.0 equiv) (S)-4-(((9H-fluoren-9-yl)methoxy)carbonyl)amino)-5-(tert-butoxy)-5-oxopentanoic acid and 28.2 mg (0.207 mmol, 1.0 equiv) HOAt were added and the mixture was cooled to 0°C. 39.7 mg (0.207 mmol, 1.0 equiv) EDCI was added and the mixture was stirred for 12 h at 23°C, before it was poured into 5 mL of H<sub>2</sub>O and extracted with EtOAc (3x 15 mL). The combined organic layers were dried over Na<sub>2</sub>SO<sub>4</sub> and concentrated under reduced pressure. The residue was purified by flash-chromatography through silicagel (PE:EtOAc/8:2 – 1:1 -0:1) yielding 80 mg (0.1197 mmol, 58%) of **38** as a colorless, amorph solid.

**Methyl N<sup>2</sup>-((S)-4-(((9H-fluoren-9-yl)methoxy)carbonyl)amino)-5-(tert-butoxy)-5-oxopentanoyl)-N<sup>6</sup>-(tert-butoxycarbonyl)-L-lysinate (**38**):** TLC (PE:EtOAc/1:1) R<sub>f</sub>: 0.16 [UV<sup>254</sup>], IR (ATR) [cm<sup>-1</sup>]: 3329, 2977, 2952, 2931, 2868, 171 1663, 1525, 1479, 1451, 1392, 1367, 1346, 1249, 1158, 1105, 1082, 1052, 912, 848, 760, 738, 647, 621, 591, 575, 526. <sup>1</sup>H-NMR (500 MHz, CDCl<sub>3</sub>) δ [ppm]: 7.77 (d, *J* = 7.6 Hz, 2H), 7.61 (d, *J* = 7.3 Hz, 2H), 7.40 (td, *J* = 7.4, 2.9 Hz, 2H), 7.35 – 7.30 (m, 2H), 6.40 (d, *J* = 6.4 Hz, 1H), 5.56 (d, *J* = 8.1 Hz, 1H), 4.64 (s, 1H), 4.58 (q, *J* = 7.6 Hz, 1H), 4.48 – 4.35 (m, 2H), 4.23 (q, *J* = 7.7, 7.0 Hz, 2H), 3.72 (s, 3H), 3.09 (d, *J* = 5.7 Hz, 2H), 2.29 (t, *J* = 6.8 Hz, 2H), 2.26 – 2.18 (m, 1H), 1.94 – 1.80 (m, 2H), 1.70 (q, *J* = 13.4 Hz, 1H), 1.47 (s, 9H), 1.42 (s, 9H), 1.52 – 1.28 (m, 3H), 0.94 – 0.75 (m, 2H).. <sup>13</sup>C-NMR (126 MHz, CDCl<sub>3</sub>) δ [ppm]: 172.97, 171.86, 171.23, 156.50, 156.21, 144.06, 143.83, 141.47, 127.87, 127.23, 125.31, 125.25, 120.14, 120.12, 82.73, 79.24, 67.15, 53.97, 52.52, 52.23, 47.36, 40.16, 32.40, 32.04, 29.69, 29.16, 28.57, 28.15, 22.56. . LRMS (ESI-Quad) [m/z]: 668.4 [M+H]<sup>+</sup>, HRMS (ESI-IT) [m/z]: 668.354552, calculated 668354157 for C<sub>36</sub>H<sub>50</sub>N<sub>3</sub>O<sub>9</sub> [M+H]<sup>+</sup>, err [ppm] -0.592

**Synthesis of methyl N<sup>2</sup>-(((9H-fluoren-9-yl)methoxy)carbonyl)-N<sup>5</sup>-((S)-6-(4-azidobenzamido)-1-methoxy-1-oxohexan-2-yl)-L-glutamine (39)**

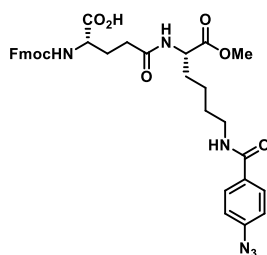

Chemical Formula: C<sub>34</sub>H<sub>36</sub>N<sub>6</sub>O<sub>8</sub>  
Molecular Weight: 656,70

39

To a solution of 100 mg (0.149 mmol, 1.0 equiv) of methyl N<sup>2</sup>-((S)-4-(((9H-fluoren-9-yl)methoxy)carbonyl)amino)-5-(tert-butoxy)-5-oxopentanoyl)-N<sup>6</sup>-(tert-butoxycarbonyl)-L-lysinate **38** in 2.99 mL dry CH<sub>2</sub>Cl<sub>2</sub> was added 344 μL (4.492 mmol, 30 equiv) TFA at 23°C and the mixture was stirred for 22 h at 23°C until the starting material was completely consumed. The reaction mixture was diluted with toluene (20 mL), concentrated and co-evaporated with toluene (3x 10 mL) under reduced pressure and dried in HV. The residue containing the free amine was dissolved together with 83 μL (0.749 mmol, 5.0 equiv) NMM in 499 μL dry DMF and added to a preactivated<sup>vii</sup> solution of 26.9 mg (0.165 mmol, 1.0 equiv) 4-azidobenzoic acid, 83 μL (0.749 mmol, 5.0 equiv) NMM, 22.4 mg (0.165 mmol, 1.0 equiv) HOAt and 62.6 mg (0.165 mmol, 1.0 equiv) HATU in 499 μL dry DMF. The resulting solution was stirred for 3 h at 23°C, before was diluted with toluene (20 mL), concentrated and co-evaporated with toluene (3x 20 mL) under reduced pressure. The residue was purified by flash-chromatography through silicagel (CH<sub>2</sub>Cl<sub>2</sub>:MeOH:HOAc/95:4.75:0.25) and the product containing fractions were coevaporated with toluene under reduced pressure and dried in HV yielding 86 mg (0.131 mmol, 88%) of **39** as a yellow, amorphous solid.

**Methyl N<sup>2</sup>-(((9H-fluoren-9-yl)methoxy)carbonyl)-N<sup>5</sup>-((S)-6-(4-azidobenzamido)-1-methoxy-1-oxohexan-2-yl)-L-glutamine (39):** TLC (PE:EtOAc/1:1) R<sub>f</sub>: 0.16 [UV<sup>254</sup>], IR (ATR) [cm<sup>-1</sup>]: 3415, 2931, 2860, 2123, 1686, 1641, 1604, 1573, 1537, 1500, 1450, 1281, 1205, 1160, 1132, 1064, 1053, 992, 910, 840, 801, 761, 741, 724, 689, 647, 621. <sup>1</sup>H-NMR (500 MHz, MeOD-*d*<sub>4</sub>) δ [ppm]: 7.85 – 7.79 (m, 1H), 7.78 (d, *J* = 7.5 Hz, 1H), 7.66 (t, *J* = 7.4 Hz, 1H), 7.38 (t, *J* = 7.5 Hz, 1H), 7.30 (td, *J* = 7.5, 1.0 Hz, 1H), 7.14 – 7.05 (m, 1H), 4.39 (dd, *J* = 9.1, 5.0 Hz, 1H), 4.38 – 4.26 (m, 1H), 4.20 (t, *J* = 6.9 Hz, 1H), 4.11 (dd, *J* = 8.6, 4.6 Hz, 1H), 3.85 – 3.76 (m, 2H), 3.68 (s, 2H), 3.36 (t, *J* = 6.9 Hz, 1H), 3.01 (s, 2H), 2.32 (t, *J* = 7.4 Hz, 1H), 2.17 (td, *J* = 13.0, 8.0 Hz, 1H), 1.97 – 1.81 (m, 2H), 1.72 (dtd, *J* = 14.2, 9.3, 5.7 Hz, 1H), 1.62 (dhept, *J* = 13.6, 6.9 Hz, 2H), 1.51 – 1.38 (m, 2H)..

<sup>vii</sup> For preactivation the mixture was stirred for 30 min at 23°C.

**<sup>13</sup>C-NMR** (126 MHz, MeOD-*d*<sub>4</sub>) δ [ppm]: 177.07, 175.41, 174.25, 169.13, 158.42, 145.39, 145.20, 144.73, 142.55, 132.24, 130.14, 128.76, 128.17, 126.27, 126.24, 120.89, 119.95, 67.91, 65.84, 56.03, 55.09, 53.70, 52.64, 48.42, 44.67, 40.63, 33.15, 32.12, 29.95, 29.55, 24.28. **LRMS** (ESI-Quad) [m/z]: 657.3 [M+H]<sup>+</sup>, **HRMS** (ESI-IT) [m/z]: 657.267199, calculated 657.266739 for C<sub>34</sub>H<sub>36</sub>N<sub>6</sub>O<sub>8</sub> [M+H]<sup>+</sup>, err [ppm] -0.700.

**Synthesis of Fa-N<sub>3</sub>-1** - N<sup>2</sup>-(4-(((2-amino-4-hydroxypteridin-6-yl)methyl)amino)benzoyl)-N<sup>5</sup>-((S)-4-(((S)-6-(4-azidobenzamido)-1-methoxy-1-oxohexan-2-yl)amino)-1-carboxy-4-oxobutyl)-L-glutamine

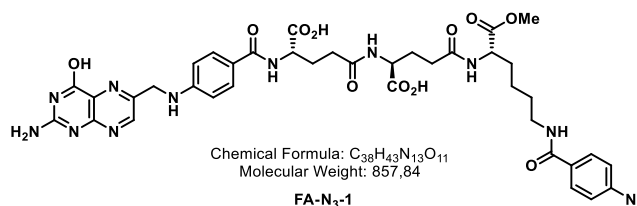

To a solution of 60 mg (0.091 mmol, 1.0 equiv) methyl N<sup>2</sup>-(((9H-fluoren-9-yl)methoxy)carbonyl)-N<sup>5</sup>-((S)-6-(4-azidobenzamido)-1-methoxy-1-oxohexan-2-yl)-L-glutamine **39** in 456 μL dry DMF was added 146 μL (1.6 mL/mmol) diethylamine and the mixture was stirred for 20 h at 23°C, before it was diluted with toluene (20 mL), concentrated and co-evaporated with toluene (3x 10 mL) under reduced pressure and dried in HV obtaining a residue containing the free amine.

In parallel, 63 mg (0.548 mmol, 6.0 equiv) N-hydroxysuccinimide and 113 mg (0.548 mmol, 6.0 equiv) DCC were added to a solution of 242 mg (0.548 mmol, 6.0 equiv) folic acid in 2.7 mL dry DMSO and the mixture was stirred for 24 h at 23°C under light exclusion to form the corresponding FA-NHS ester in a white suspension. This suspension was then filtered and the filtrate was poured onto the residue containing the free amine (described above). 90 μL (0.823 mmol, 9.0 equiv) NMM were added and the mixture was stirred for 14 h at 23°C. The mixture was diluted with 1.2 mL H<sub>2</sub>O, filtered through a Whatman® filter (45 μm) and directly purified RP prep HPLC (Phenomenex Gemini C18 RP-column 00G-4435-PO-AX, 5 μm, 110 Å, 250×21.20 mm, Flow: 9 mL/min, ACN:H<sub>2</sub>O + TFA/ 10:90 + 0.1% → 95:5 + 0.1% in 60 min) yielding after lyophilization 35.3 mg (41.1 μmol, 45%) of **Fa-N<sub>3</sub>-1** as a deep-yellow solid.

**Fa-N<sub>3</sub>-1**: **<sup>1</sup>H-NMR** (500 MHz, DMSO-*d*<sub>6</sub>) δ [ppm]: 12.54 (s, 2H), 8.67 (s, 1H), 8.57 – 8.38 (m, 1H), 8.28 – 8.18 (m, 2H), 8.15 (dd, *J* = 15.1, 7.8 Hz, 1H), 7.90 – 7.85 (m, 2H), 7.66 (dd, *J* = 8.6, 6.3 Hz, 2H), 7.47 – 6.85 (m, 2H), 7.18 (d, *J* = 8.6 Hz, 2H), 6.64 (d, *J* = 7.6 Hz, 2H), 4.50 (s, 2H), 4.36 – 4.26 (m, 1H), 4.23 – 4.06 (m, 3H), 3.27 – 3.12 (m, 3H), 2.99 (s, 1H), 2.33 – 2.22 (m, 2H), 2.19 (dd, *J* = 18.2, 9.1 Hz, 2H), 2.06 (d, *J* = 13.6 Hz, 1H), 1.99 – 1.83 (m, 2H), 1.77 – 1.63 (m, 2H), 1.63 – 1.54 (m, 1H), 1.48 (s, 2H), 1.31 (s, 2H). **<sup>13</sup>C-NMR** (126 MHz, MeOD-*d*<sub>4</sub>) δ [ppm]: **<sup>13</sup>C NMR** (126 MHz, DMSO) δ 173.71, 173.38, 172.73, 171.76, 171.65, 171.50, 166.37, 166.27, 165.09, 160.54, 153.36, 150.68, 149.25, 148.37, 142.04, 131.16, 128.98, 127.92, 121.34,

118.80, 111.16, 52.20, 51.83, 51.69, 51.44, 45.84, 31.32, 31.27, 30.50, 28.59, 26.87, 26.66, 22.81. **LRMS** (ESI-Quad) [m/z]: 858.3 [M+H]<sup>+</sup>, **HRMS** (ESI-IT) [m/z]: 858.327991, calculated 858.327776 for C<sub>38</sub>H<sub>44</sub>N<sub>13</sub>O<sub>11</sub> [M+H]<sup>+</sup>, err [ppm] -0.25.

### Synthesis of methyl N<sup>2</sup>-(((9H-fluoren-9-yl)methoxy)carbonyl)-N<sup>6</sup>-(4-azidobenzoyl)-L-lysinate (**40**)

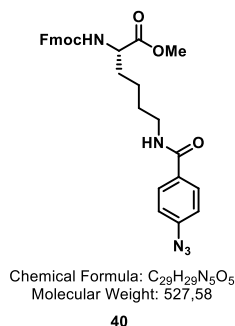

40

To a solution of 40.5 mg (0.248 mmol, 1.2 equiv) 4-azidobenzoic acid and 29.8 mg (0.258 mmol, 1.25 equiv) N-hydroxysuccinimide in 1.2 mL dry THF was added 53.4 mg (0.258 mmol, 1.25 equiv) DCC and the mixture was stirred for 9 h at 23°C to form the corresponding 4-azidobenzoic acid NHS ester in a white suspension. In parallel, 237 μL (3.108 mmol, 15 equiv) TFA was added to a solution of 100 mg (0.207 mmol, 1.0 equiv) methyl N<sup>2</sup>-(((9H-fluoren-9-yl)methoxy)carbonyl)-N<sup>6</sup>-(tert-butoxycarbonyl)-L-lysinate **37** in 4.2 mL CH<sub>2</sub>Cl<sub>2</sub> and the mixture was stirred for 3 h at 23°C until the starting material was consumed. The mixture was diluted with toluene (20 mL), concentrated and coevaporated with toluene (3x 10 mL) under reduced pressure. The residue containing the corresponding free amine was dissolved in 0.9 mL dry THF, 136.5 μL (1.242 mmol, 6.0 equiv) NMM was added and the filtrate of the suspension containing the 4-azidobenzoic acid NHS ester added. The resulting mixture was stirred for 20 h at 23°C. The solvents were removed under reduced pressure and the residue was purified by flash-chromatography through silicagel (CH<sub>2</sub>Cl<sub>2</sub>:MeOH/1:0 – 97.5:2.5) yielding 98 mg (0.186 mmol, 90%) of **40** as an amorph, yellow solid.

**Methyl N<sup>2</sup>-(((9H-fluoren-9-yl)methoxy)carbonyl)-N<sup>6</sup>-(4-azidobenzoyl)-L-lysinate (**40**):** <sup>1</sup>H-NMR (500 MHz, CDCl<sub>3</sub>) δ [ppm]: 7.78 – 7.74 (m, 4H), 7.56 (d, J = 7.4 Hz, 2H), 7.40 (td, J = 7.4, 3.1 Hz, 2H), 7.32 – 7.26 (m, 2H), 6.95 (d, J = 8.4 Hz, 2H), 6.36 (s, 1H), 5.54 (d, J = 8.2 Hz, 1H), 4.43 – 4.34 (m, 2H), 4.30 (dd, J = 10.5, 7.3 Hz, 1H), 4.18 (t, J = 7.1 Hz, 1H), 3.75 (s, 3H), 3.44 (q, J = 6.4 Hz, 2H), 1.93 – 1.84 (m, 1H), 1.80 – 1.59 (m, 4H), 1.46 (dt, J = 16.3, 7.9 Hz, 2H), 1.32 – 1.24 (m, 1H). <sup>13</sup>C-NMR (126 MHz, CDCl<sub>3</sub>) δ [ppm]: 173.02, 166.78, 156.30, 143.91, 143.75, 143.28, 141.40, 131.07, 128.82, 127.87, 127.19, 125.15, 120.14, 119.00, 67.22, 53.55, 52.63, 47.24, 39.71, 32.84, 32.54, 28.86, 25.22, 24.51, 22.62. **LRMS** (ESI-Quad) [m/z]: 528.2 [M+H]<sup>+</sup>, **HRMS** (ESI-IT) [m/z]: 528.224467, calculated 528.224146 for C<sub>29</sub>H<sub>30</sub>N<sub>5</sub>O<sub>5</sub> [M+H]<sup>+</sup>, err [ppm] -0.608.



**Synthesis of Fmoc-(Asp(tBu))<sub>3</sub>-OH** - (5S,8S,11S)-5,8,11-tris(2-(tert-butoxy)-2-oxoethyl)-1-(9H-fluoren-9-yl)-3,6,9-trioxo-2-oxa-4,7,10-triazadodecan-12-oic acid

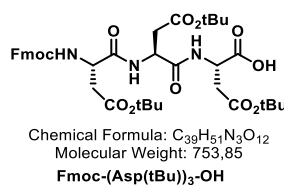

The solid-phase synthesis of the tripeptide **Fmoc-(Asp(tBu))<sub>3</sub>-OH** was carried out manually on a scale of 100 μmol on Rapp 2-chlorotrityl resin (Rapp Polymere, Tübingen, Germany, 0.91 mmol/g) using fritted glass peptide synthesis vessels. For the loading of the first amino acid to the resin a solution 41.2 mg (100 μmol, 1.0 equiv) Fmoc-Asp(OtBu)-OH and 110 μL (1.0 mmol, 10 equiv) NMM in 4 mL dry DMF was reacted with the resin shaking it for 24 h at 23°C. The solvent was removed from the resin and the resin was reacted shaking it for 1 h at 23°C with a solution of 1 mL MeOH and 220 μL (2.0 mmol, 20 equiv) NMM in 4 mL dry DMF. The resin was washed with DMF, CH<sub>2</sub>Cl<sub>2</sub> and DMF (each 3x 4 mL, 2 min). Fmoc cleavage achieved by repeated reaction of the resin shaking it with a mixture of Piperidin in DMF (Pip:DMF/1:4, 3x 4 mL, 10 min) and subsequent washing of the resin with DMF, CH<sub>2</sub>Cl<sub>2</sub> and DMF (each 3x 4 mL, 2 min). The coupling of the amino acids was performed shaking with preactivated solutions of 84.4 mg (200 μmol, 2.0 equiv) Fmoc-D-Asp(OtBu)-OH or Fmoc-Asp(OtBu)-OH, 27.2 (200 μmol, 2.0 equiv) HOAt, 55 μL (600 μmol, 6.0 equiv) NMM and 165 mg (200 μmol, 2.0 equiv) HATU in 4 mL of dry DMF with coupling times of 4 h at 23°C. Subsequently the resin was washed with DMF, CH<sub>2</sub>Cl<sub>2</sub> and DMF (each 3x 4 mL, 2 min). The cleavage of the tripeptide from the resin was managed by repeated treatment of the resin with a mixture of CH<sub>2</sub>Cl<sub>2</sub>:HFIP/4:1 (3x 4 mL, 10 min). The combined cleavage solutions were concentrated under reduced pressure and the residue was purified by flash-chromatography through silicagel (PE:EtOAc/8:2 – 1:1) yielding **Fmoc-(Asp(tBu))<sub>3</sub>-OH** as a white, amorphous solid.

**Fmoc-(Asp(tBu))<sub>3</sub>-OH**: **TLC**: <sup>1</sup>H-NMR (500 MHz, DMSO-*d*<sub>6</sub>) δ [ppm]: 8.28 – 8.20 (m, 1H), 8.09 (s, 2H), 7.89 (d, *J* = 7.6 Hz, 2H), 7.74 – 7.62 (m, 3H), 7.41 (t, *J* = 7.5 Hz, 2H), 7.32 (t, *J* = 7.4 Hz, 2H), 5.16 (p, *J* = 6.8 Hz, 2H), 4.64 – 4.54 (m, 1H), 4.53 – 4.43 (m, 1H), 4.38 (td, *J* = 9.7, 4.3 Hz, 1H), 4.32 – 4.19 (m, 1H), 2.64 (tt, *J* = 14.3, 7.6, 6.3, 3.9 Hz, 2H), 2.50 (dt, *J* = 3.7, 1.8 Hz, 2H), 1.42 – 1.32 (m, 29H). <sup>13</sup>C-NMR (126 MHz, CDCl<sub>3</sub>) δ [ppm]: 171.15, 171.03, 170.80, 170.50, 170.04, 163.19, 156.20, 143.75, 141.38, 127.86, 127.24, 125.24, 120.09, 82.16, 82.06, 82.00, 67.57, 51.65, 49.67, 49.27, 47.16, 37.50, 37.10, 36.95, 28.09. **LRMS** (ESI-Quad) [m/z]: 776.3 [M+Na]<sup>+</sup>, **HRMS** (ESI-IT) [m/z]: 776.3395, calculated 776.3365 for C<sub>23</sub>H<sub>34</sub>N<sub>5</sub>NaO<sub>6</sub> [M+Na]<sup>+</sup>, err [ppm] 3.86

**Synthesis of (7S,10S,13S,16S)-16-(((9H-fluoren-9-yl)methoxy)carbonyl)amino)-1-(4-azidophenyl)-10,13-bis(carboxymethyl)-7-(methoxycarbonyl)-1,9,12,15-tetraoxo-2,8,11,14-tetraazaoctadecan-18-oic acid (41)**

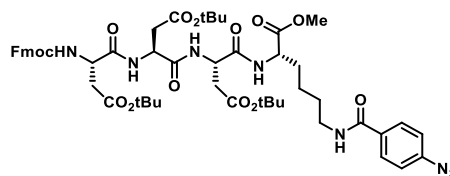

Chemical Formula: C<sub>53</sub>H<sub>68</sub>N<sub>8</sub>O<sub>14</sub>  
Molecular Weight: 1041.17

41

To a solution of 53 mg (99.5 μmol, 1.5 equiv) of methyl N<sup>2</sup>-(((9H-fluoren-9-yl)methoxy)carbonyl)-N<sup>6</sup>-(4-azidobenzoyl)-L-lysinate **40** in 1.6 mL CH<sub>2</sub>Cl<sub>2</sub> was added 159 μL (1.6 mL/mmol) diethylamine and the mixture was stirred for 9 h at 23°C. The mixture was diluted with toluene (5 mL), concentrated and coevaporated with toluene (3x 5 mL) under reduced pressure and dried in HV. The residue was dissolved in 201 μL dry DMF and the resulting solution was added to a preactivated<sup>viii</sup> mixture of 50 mg (60.3 μmol, 1.0 equiv) **Fmoc-(Asp(OtBu))<sub>3</sub>-OH**, 9.9 mg (72.5 μmol, 1.2 equiv) HOAt, 437 μL (0.397 mmol, 6.0 equiv) NMM and 13.9 mg (72.5 μmol, 1.2 equiv) HATU and the mixture was stirred for 5.5 h at 23°C. The mixture was poured into 50 mL H<sub>2</sub>O and extracted with Et<sub>2</sub>O (3x 20 mL). The combined organic extracts were dried over Na<sub>2</sub>SO<sub>4</sub> and concentrated under reduced pressure. The residue was purified by flash-chromatography through silicagel (PE:EtOAc/9:1 – 7:3 – 1:1 – 0:1) yielding 35.6 mg (34.1 μmol, 52%) of **41** as a pale-yellow, amorph solid.

**(7S,10S,13S,16S)-16-(((9H-fluoren-9-yl)methoxy)carbonyl)amino)-1-(4-azidophenyl)-10,13-bis(carboxymethyl)-7-(methoxycarbonyl)-1,9,12,15-tetraoxo-2,8,11,14-tetraazaoctadecan-18-oic acid (41):** TLC (PE:EtOAc/1:1) R<sub>f</sub>: 0.19 [UV<sup>254</sup>, Ninhydrin], <sup>1</sup>H-NMR (500 MHz, DMSO-*d*<sub>6</sub>) δ [ppm]: 8.44 (q, *J* = 5.8 Hz, 1H), 8.37 – 8.20 (m, 1H), 8.10 – 7.93 (m, 2H), 7.91 – 7.83 (m, 4H), 7.77 – 7.70 (m, 1H), 7.69 (t, *J* = 8.3 Hz, 2H), 7.41 (t, *J* = 7.5 Hz, 2H), 7.31 (t, *J* = 7.5 Hz, 2H), 7.21 – 7.12 (m, 2H), 4.66 – 4.46 (m, 2H), 4.41 – 4.14 (m, 4H), 3.59 (s, 3H), 3.27 – 3.15 (m, 2H), 2.73 – 2.58 (m, 3H), 2.48 – 2.38 (m, 3H), 1.78 – 1.58 (m, 2H), 1.54 – 1.44 (m, 2H), 1.39 – 1.30 (m, 29H). <sup>13</sup>C-NMR (126 MHz, DMSO-*d*<sub>6</sub>) δ [ppm]: 171.54, 170.22, 170.18, 169.48, 168.88, 168.79, 168.69, 164.86, 155.31, 143.41, 143.34, 141.59, 140.32, 131.27, 128.58, 127.12, 126.54, 124.66, 119.52, 118.31, 79.97, 79.84, 65.70, 54.25, 51.76, 51.73, 51.31, 51.16, 49.65, 49.61, 49.51, 49.30, 49.22, 46.40, 38.61, 37.80, 37.13, 37.06, 36.93, 36.84, 36.79, 30.36, 30.33, 28.19, 28.13, 27.35, 27.30, 22.28. **LRMS** (ESI-Quad) [*m/z*]: 1042.3 [M+Na]<sup>+</sup>.

<sup>viii</sup> For preactivation the mixture was stirred for 15 min at 23°C.

**Synthesis of FA-N<sub>3</sub>-2** - N<sup>2</sup>-(4-(((2-amino-4-hydroxypteridin-6-yl)methyl)amino)benzoyl)-N<sup>5</sup>-(((S)-1-(((S)-1-(((S)-1-(((S)-6-(4-azidobenzamido)-1-methoxy-1-oxohexan-2-yl)amino)-3-carboxy-1-oxopropan-2-yl)amino)-3-carboxy-1-oxopropan-2-yl)amino)-3-carboxy-1-oxopropan-2-yl)-L-glutamine

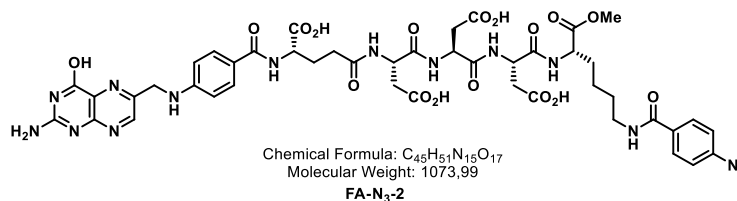

To a solution of 20 mg (0.0233 mmol, 1.0 equiv) (7S,10S,13S,16S)-16-(((9H-fluoren-9-yl)methoxy)carbonyl)amino)-1-(4-azidophenyl)-10,13-bis(carboxymethyl)-7-(methoxycarbonyl)-1,9,12,15-tetraoxo-2,8,11,14-tetraazaoctadecan-18-oic acid **41** in 466  $\mu$ L dry CH<sub>2</sub>Cl<sub>2</sub> was added 89  $\mu$ L (1.166 mmol, 50.0 equiv) TFA and the mixture was stirred for 28 h at 23°C. The reaction was diluted with toluene (5 mL), concentrated and coevaporated with toluene (3x 5 mL) under reduced pressure. The resulting residue was dried in HV, re-dissolved in 466  $\mu$ L CH<sub>2</sub>Cl<sub>2</sub> and 75  $\mu$ L (3.2 mL/mmol) diethylamine was added and the reactions mixture was stirred for 20 h at 23°C. The mixture was diluted with toluene (5 mL), concentrated and coevaporated with toluene (3x 5 mL) under reduced pressure. The resulting residue containing the raw (7S,10S,13S,16S)-16-amino-1-(4-azidophenyl)-10,13-bis(carboxymethyl)-7-(methoxycarbonyl)-1,9,12,15-tetraoxo-2,8,11,14-tetraazaoctadecan-18-oic acid was dried in HV.

In parallel, 16 mg (0.1398 mmol, 6.0 equiv) N-hydroxysuccinimide and 29 mg (0.1398 mmol, 6.0 equiv) DCC were added to a solution of 62 mg (0.1398 mmol, 6.0 equiv) folic acid in 699  $\mu$ L dry DMSO and the mixture was stirred for 24 h at 23°C under light exclusion to form the corresponding FA-NHS ester in a white suspension. This suspension was then filtered and the filtrate was poured onto the residue containing the (7S,10S,13S,16S)-16-amino-1-(4-azidophenyl)-10,13-bis(carboxymethyl)-7-(methoxycarbonyl)-1,9,12,15-tetraoxo-2,8,11,14-tetraazaoctadecan-18-oic acid (described above). 23  $\mu$ L (0.209 mmol, 9.0 equiv) NMM were added and the mixture was stirred for 20 h at 23°C. The mixture was diluted with 600  $\mu$ L H<sub>2</sub>O:ACN/70:30 + 0.05% TFA, filtered through a Whatman® filter (45  $\mu$ m) and directly purified RP prep HPLC (Phenomenex Gemini C18 RP-column 00G-4435-PO-AX, 5  $\mu$ m, 110 A, 250x21.20 mm, Flow: 9 mL/min, ACN:H<sub>2</sub>O + TFA/ 10:90 + 0.1%  $\rightarrow$  95:5 + 0.1% in 60 min) yielding after lyophilization 8.0 mg (7.45  $\mu$ mol, 32%) of **FA-N<sub>3</sub>-2** as its TFA salt as a deep-yellow solid.

**Fa-N<sub>3</sub>-2**: <sup>1</sup>H-NMR (500 MHz, DMSO-*d*<sub>6</sub>)  $\delta$  [ppm]: 12.33 (s, 4H), 8.66 (s, 1H), 8.41 (dd, *J* = 27.8, 6.8 Hz, 1H), 8.27 – 8.10 (m, 3H), 8.06 – 7.91 (m, 1H), 7.89 – 7.86 (m, 2H), 7.86 – 7.76 (m, 1H), 7.66 (d, *J* = 8.7 Hz, 2H), 7.21 – 7.13 (m, 2H), 7.07 (s, 2H), 6.64 (d, *J* = 8.5 Hz, 2H), 4.61 – 4.43 (m, 5H), 4.36 – 4.25 (m, 1H), 4.26 – 4.13 (m, 2H), 3.62 – 3.49 (m, 3H), 3.29 – 3.14 (m, 4H), 2.79 – 2.59 (m, 4H), 2.33 – 2.14 (m, 2H), 2.10 – 2.00

(m, 1H), 1.95 – 1.82 (m, 1H), 1.76 – 1.58 (m, 2H), 1.49 (d,  $J = 5.0$  Hz, 2H), 1.29 (d,  $J = 30.6$  Hz, 2H).  **$^{13}\text{C-NMR}$**  (126 MHz,  $\text{DMSO-}d_6$ )  $\delta$  [ppm]: 173.71, 173.70, 172.23, 172.20, 171.85, 171.84, 171.63, 170.49, 170.42, 170.34, 170.27, 166.30, 165.12, 160.67, 158.29, 158.10, 157.90, 157.71, 153.46, 150.71, 149.06, 148.43, 142.03, 131.19, 129.02, 127.93, 121.28, 118.80, 111.16, 52.06, 51.78, 49.64, 45.85, 40.01, 35.99, 35.82, 31.85, 30.41, 28.58, 28.46, 26.53, 22.69, 22.65, 14.01, 13.05. **LRMS** (ESI-Quad) [m/z]: 1074.4 [M+H]<sup>+</sup>, **HRMS** (ESI-IT) [m/z]: 1074.36278, calculated 1074.36601 for  $\text{C}_{45}\text{H}_{51}\text{N}_{15}\text{O}_{17}$  [M+H]<sup>+</sup>, err [ppm] -3.006.

## Synthesis of Folate derivatives by Solid-Phase Synthesis

### Synthesis of N<sup>2</sup>-(((9H-fluoren-9-yl)methoxy)carbonyl)-N<sup>6</sup>-(4-azidobenzoyl)-L-lysine

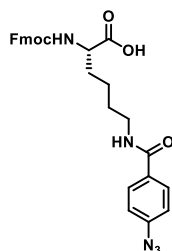

Chemical Formula: C<sub>28</sub>H<sub>27</sub>N<sub>5</sub>O<sub>5</sub>  
Molecular Weight: 513,55

To a solution of 1.5 g (3.201 mmol, 1.0 equiv) N<sup>2</sup>-(((9H-fluoren-9-yl)methoxy)carbonyl)-N<sup>6</sup>-(tert-butoxycarbonyl)-L-lysine in 64 mL CH<sub>2</sub>Cl<sub>2</sub> was added 3.68 mL (48.020 mmol, 15 eq) TFA and the mixture was stirred for 3 h at 23°C. The mixture was diluted with toluene (25 mL), concentrated and co-evaporated with toluene (2x 25 mL) under reduced pressure. The residue containing the free amine was dried in HV.

In parallel, 278 μL (3.841 mmol, 1.2 equiv) thionyl chloride and 20 μL of dry DMF were added to a solution of 523 mg (3.201 mmol, 1.0 equiv) 4-azidobenzoic acid in 10.7 mL CH<sub>2</sub>Cl<sub>2</sub> at 0°C and the mixture was stirred at 23°C for 4 h. The reaction mixture was concentrated under reduced pressure and dried in HV. The residue was redissolved in 2.6 mL dry dioxane and added dropwise to a mixture of the free amine (described above) in 13.3 mL dioxane and 13.3 mL of aqueous 25w% K<sub>2</sub>CO<sub>3</sub> solution. The mixture was then stirred for 41 h at 23°C. The mixture was washed with tert-butylmethylether (3x 25 mL), the aqueous layer was acidified to pH = 2 with concentrated HCl and extracted with CHCl<sub>3</sub> (3x 25 mL). The combined organic layers were dried over Na<sub>2</sub>SO<sub>4</sub> and concentrated under reduced pressure. The residue was purified by flash-chromatography through silicagel (CH<sub>2</sub>Cl<sub>2</sub>:MeOH/1:0 – 95:5 – 9:1) yielding 1.214 g (2.365 mmol, 74%) of N<sup>2</sup>-(((9H-fluoren-9-yl)methoxy)carbonyl)-N<sup>6</sup>-(4-azidobenzoyl)-L-lysine as a white, amorph solid.

**N<sup>2</sup>-(((9H-fluoren-9-yl)methoxy)carbonyl)-N<sup>6</sup>-(4-azidobenzoyl)-L-lysine:** <sup>1</sup>H-NMR (500 MHz, DMSO-*d*<sub>6</sub>) δ [ppm]: 12.56 (s, 1H), 8.47 (t, *J* = 5.6 Hz, 1H), 7.93 – 7.83 (m, 4H), 7.71 (d, *J* = 7.5 Hz, 2H), 7.63 (d, *J* = 8.0 Hz, 1H), 7.41 (t, *J* = 7.5 Hz, 2H), 7.31 (t, *J* = 7.4 Hz, 2H), 7.22 – 7.11 (m, 2H), 4.32 – 4.13 (m, 3H), 3.98 – 3.86 (m, 1H), 3.24 (q, *J* = 6.5 Hz, 2H), 1.79 – 1.69 (m, 1H), 1.64 (dtd, *J* = 14.2, 9.6, 5.2 Hz, 1H), 1.51 (dhept, *J* = 13.0, 6.7 Hz, 2H), 1.38 (dt, *J* = 15.8, 8.1 Hz, 2H). <sup>13</sup>C-NMR (126 MHz, DMSO-*d*<sub>6</sub>) δ [ppm]: 173.96, 165.07, 156.13, 143.79, 142.03, 140.67, 131.19, 129.00, 127.60, 127.03, 125.24, 120.09, 118.79, 65.58, 53.74, 46.63, 30.45, 28.68, 23.16. **LRMS** (ESI-Quad) [*m/z*]: 514.3 [M+H]<sup>+</sup>, **HRMS** (ESI-IT) [*m/z*]: 514.2076, calculated 514.2085 for C<sub>28</sub>H<sub>28</sub>N<sub>5</sub>O<sub>5</sub> [M+H]<sup>+</sup>, err [ppm] -1.750.

### General procedure A for the solid-supported synthesis of FA-N<sub>3</sub>

The solid-phase syntheses of the **FA-N<sub>3</sub>-3-11** were carried out manually on a scale of 218 μmol on Rapp 2-chlorotrityl resin (Rapp Polymere, Tübingen, Germany, 1.09 mmol/g) using fritted glass peptide synthesis vessels and Fmoc-protected amino acids. The side chain protections of the amino acids were as follows: Lys(Boc) and Asp(OtBu). Furthermore Fmoc-azidoornithine, (S)-4-((((9H-fluoren-9-yl)methoxy)carbonyl)amino)-5-(tert-butoxy)-5-oxopentanoic acid and N<sup>2</sup>-((((9H-fluoren-9-yl)methoxy)carbonyl)-N<sup>6</sup>-(4-azidobenzoyl)-L-lysine were utilized. For the loading of the resin a solution of the first Fmoc-protected amino acid (218 μmol, 1.0 equiv) Fmoc-Cys(Trt)-OH and 497 μL (4.36 mmol, 20 equiv) NMM in 4 mL dry DMF was reacted shaking it with the resin for 24 h at 23°C. The solvent was removed from the resin and the resin was reacted shaking it for 1 h at 23°C with a solution of 1 mL MeOH and 497 μL (4.36 mmol, 20 equiv) NMM in 4 mL dry DMF. The resin was washed with DMF, CH<sub>2</sub>Cl<sub>2</sub> and DMF (each 3x 4 mL, 2 min). Fmoc cleavage was achieved by repeated reaction of the resin shaking it with a mixture of Piperidin in DMF (Pip:DMF/1:4, 3x 5 mL, 10 min) and subsequent washing of the resin with DMF, CH<sub>2</sub>Cl<sub>2</sub> and DMF (each 3x 4 mL, 2 min). The coupling of the amino acids was performed shaking with preactivated solutions of Fmoc-protected amino acids (436 μmol, 2.0 eq), 59 mg (436 μmol, 2.0 equiv) HOAt, 144 μL (1.308 mmol, 6.0 equiv) NMM and 166 mg (436 μmol, 2.0 equiv) HATU in 4 mL of dry DMF with coupling times of 4 h at 23°C. Subsequently the resin was washed with DMF, CH<sub>2</sub>Cl<sub>2</sub> and DMF (each 3x 4 mL, 2 min). Fmoc cleavage was achieved by repeated reaction of the resin shaking it with a mixture of Piperidin in DMF (Pip:DMF/1:4, 3x 5 mL, 10 min) and subsequent washing of the resin with DMF, CH<sub>2</sub>Cl<sub>2</sub> and DMF (each 3x 4 mL, 2 min).

For the attachment of the folic acid unit in parallel with the last amino acid coupling 150 mg (1.308 mmol, 6.0 equiv) N-hydroxysuccinimide and 270 mg (1.308 mmol, 6.0 equiv) DCC, were added to a solution of 577 mg (1.308 mmol, 6.0 equiv) folic acid in 4 mL dry DMSO and stirred under light exclusion for 24 h at 23°C. The resulting suspension was filtered through a Whatman® filter (45 μm) onto the peptide-loaded resin presenting free amino groups (described above) and was reacted shaking it for 24 h at 23°C under light exclusion. The resin was washed with DMF, CH<sub>2</sub>Cl<sub>2</sub>, DMF, CH<sub>2</sub>Cl<sub>2</sub> (each 3x 4 mL, 2 min) and the assembled folic acid derivative was cleaved from the resin by repeated treatment with a 4:1-mixture of CH<sub>2</sub>Cl<sub>2</sub>:HFIP (3x 5 mL, 10 min). The cleavage solution was concentrated under reduced pressure and the residue treated with an Argon-flow-degassed mixture of TFA:TIPS:H<sub>2</sub>O:nPrSH/100:3:3:3 at 23°C (2x 5 mL, 1 h). Upon treatment with ice-cold Et<sub>2</sub>O (20 mL) a yellow precipitate formed, which was collected, redissolved in DMSO:H<sub>2</sub>O/1:3, filtered through a Whatman® filter (45 μm) and purified by RP prep HPLC (Phenomenex Gemini C18 RP-column 00G-4435-PO-AX, 5 μm, 110 A, 250x21.20 mm, Flow: 9 mL/min,

ACN:H<sub>2</sub>O + TFA/ 10:90 + 0.1% → 95:5 + 0.1% in 60 min) yielding after lyophilization the corresponding **FA-N<sub>3</sub>-3-11** as deep yellow, amorph solids.

### FA-N<sub>3</sub>-3

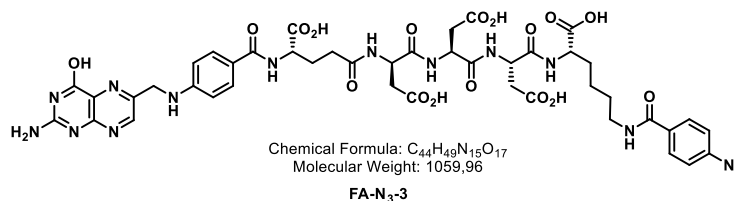

Following the general procedure A, 114 mg of **FA-N<sub>3</sub>-3** as a deep yellow, amorph TFA salt were obtained.

**FA-N<sub>3</sub>-3**: <sup>1</sup>H-NMR (700 MHz, DMSO-*d*<sub>6</sub>) δ [ppm]: 12.36 (s, 5H), 8.66 (s, 1H), 8.44 (s, 1H), 8.33 – 8.24 (m, 1H), 8.23 (s, 2H), 8.06 – 7.93 (m, 1H), 7.88 (d, *J* = 8.4 Hz, 2H), 7.68 (d, *J* = 8.9 Hz, 1H), 7.66 (dd, *J* = 8.7, 2.1 Hz, 2H), 7.17 (d, *J* = 8.5 Hz, 2H), 7.15 – 6.78 (m, 2H), 6.64 (dd, *J* = 8.8, 4.1 Hz, 2H), 4.62 – 4.41 (m, 6H), 4.31 (td, *J* = 8.7, 7.9, 4.9 Hz, 1H), 4.12 (tt, *J* = 7.9, 4.9 Hz, 1H), 3.26 – 3.16 (m, 2H), 2.82 – 2.58 (m, 4H), 2.56 – 2.50 (m, 2H), 2.34 – 2.16 (m, 2H), 2.10 – 1.83 (m, 2H), 1.76 – 1.68 (m, 1H), 1.66 – 1.55 (m, 1H), 1.54 – 1.44 (m, 2H), 1.38 – 1.27 (m, 2H). <sup>13</sup>C-NMR (126 MHz, DMSO-*d*<sub>6</sub>) δ [ppm]: 174.13, 173.71, 173.25, 172.16, 172.10, 171.88, 171.76, 171.11, 171.01, 170.33, 166.34, 165.15, 160.65, 158.44, 158.24, 158.05, 157.85, 153.44, 150.89, 150.73, 149.18, 148.43, 142.05, 131.22, 129.05, 127.96, 121.30, 118.82, 111.19, 52.01, 51.97, 49.77, 49.47, 45.87, 36.05, 35.99, 35.85, 35.79, 31.93, 31.83, 30.65, 30.28, 28.69, 26.55, 22.77. **LRMS** (ESI-Quad) [m/z]: 1060.4 [M+H]<sup>+</sup>, **HRMS** (ESI-IT) [m/z]: 530.678558, calculated 530.678819 for C<sub>44</sub>H<sub>51</sub>N<sub>15</sub>O<sub>17</sub> [M+2H]<sup>2+</sup>, err [ppm] 0.491

**FA-N<sub>3</sub>-4**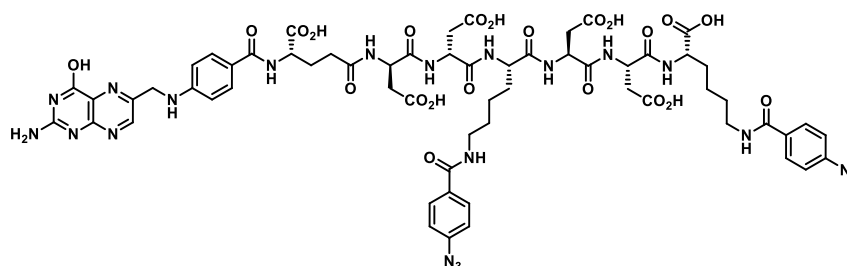

Chemical Formula: C<sub>61</sub>H<sub>69</sub>N<sub>21</sub>O<sub>22</sub>  
Molecular Weight: 1448.35

**FA-N<sub>3</sub>-4**

Following the general procedure A, 90 mg of **FA-N<sub>3</sub>-4** as a deep yellow, amorph poly TFA salt were obtained.

**FA-N<sub>3</sub>-4**: <sup>1</sup>H-NMR (700 MHz, DMSO-*d*<sub>6</sub>) δ [ppm]: 12.37 (s, 5H), 8.66 (d, *J* = 2.3 Hz, 1H), 8.46 – 8.36 (m, 2H), 8.31 – 8.11 (m, 3H), 8.10 – 7.91 (m, 2H), 7.87 (dd, *J* = 8.4, 3.3 Hz, 4H), 7.83 – 7.68 (m, 2H), 7.68 – 7.59 (m, 2H), 7.18 – 7.11 (m, 4H), 7.28 – 6.76 (m, 2H), 6.63 (t, *J* = 7.4 Hz, 2H), 4.63 – 4.43 (m, 6H), 4.37 – 3.97 (m, 3H), 3.24 – 3.14 (m, 4H), 2.77 – 2.62 (m, 5H), 2.34 – 2.17 (m, 3H), 2.09 – 2.02 (m, 1H), 1.93 – 1.84 (m, 1H), 1.77 – 1.65 (m, 2H), 1.65 – 1.52 (m, 2H), 1.53 – 1.40 (m, 5H), 1.37 – 1.22 (m, 5H). <sup>13</sup>C-NMR (176 MHz, DMSO-*d*<sub>6</sub>) δ [ppm]: 174.24, 174.13, 173.76, 173.30, 172.09, 172.06, 171.96, 171.87, 171.79, 171.75, 171.67, 171.60, 171.03, 170.97, 170.67, 170.47, 170.35, 166.38, 165.18, 160.65, 158.30, 158.10, 153.45, 150.74, 149.21, 148.43, 142.05, 131.21, 129.05, 127.96, 118.82, 111.20, 52.95, 52.08, 52.01, 49.97, 49.90, 49.66, 49.64, 49.57, 49.35, 45.88, 35.97, 35.85, 31.88, 31.28, 30.67, 30.29, 28.73, 28.69, 28.55, 26.54, 26.46, 22.83. **LRMS** (ESI-Quad) [*m/z*]: 1448.7 [M+H]<sup>+</sup>, **HRMS** (ESI-IT) [*m/z*]: 724.7536, calculated 724.7536 for C<sub>61</sub>H<sub>71</sub>N<sub>21</sub>O<sub>22</sub> [M+2H]<sup>2+</sup>, err [ppm] 0.00.

**FA-N<sub>3</sub>-5**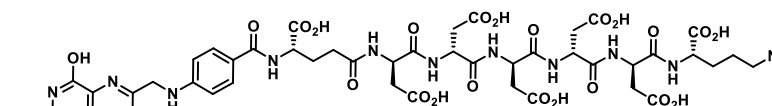

Chemical Formula: C<sub>44</sub>H<sub>52</sub>N<sub>16</sub>O<sub>22</sub>  
Molecular Weight: 1156.99

**FA-N<sub>3</sub>-5**

Following the general procedure A, 85 mg of **FA-N<sub>3</sub>-5** as a deep yellow, amorph TFA salt were obtained.

**FA-N<sub>3</sub>-5**: <sup>1</sup>H-NMR (700 MHz, DMSO-*d*<sub>6</sub>) δ [ppm]: 12.37 (s, 7H), 8.69 (s, 1H), 8.24 – 8.12 (m, 2H), 8.08 (d, *J* = 5.7 Hz, 3H), 7.80 (d, *J* = 8.0 Hz, 1H), 7.66 (d, *J* = 8.6 Hz, 2H), 7.44 (s, 1H), 6.64 (d, *J* = 8.7 Hz, 2H), 4.63 – 4.43 (m, 9H), 4.35 – 4.23 (m, 3H), 4.18 (td, *J* = 8.9, 4.9 Hz, 2H), 3.31 (t, *J* = 6.9 Hz, 2H), 2.75 – 2.63 (m, 6H), 2.32



– 2.14 (m, 2H), 2.10 – 2.00 (m, 1H), 1.95 – 1.84 (m, 1H), 1.78 (ddd,  $J = 14.2, 11.2, 6.3$  Hz, 1H), 1.65 (dp,  $J = 13.8, 4.9$  Hz, 1H), 1.58 – 1.45 (m, 2H).  $^{13}\text{C-NMR}$  (176 MHz,  $\text{DMSO-}d_6$ )  $\delta$  [ppm]: 174.09, 173.74, 173.73, 172.95, 172.93, 171.90, 171.87, 171.85, 171.82, 171.77, 171.57, 170.95, 170.89, 170.54, 170.30, 170.26, 170.21, 166.30, 160.24, 158.60, 158.39, 158.19, 157.98, 153.12, 150.68, 149.90, 148.24, 129.17, 129.02, 127.97, 121.41, 121.36, 118.19, 116.53, 114.87, 113.22, 111.21, 54.91, 52.15, 52.12, 51.40, 50.23, 50.18, 49.68, 49.58, 45.83, 40.43, 40.02, 36.08, 35.85, 31.95, 30.26, 28.14, 26.58, 24.73. **LRMS** (ESI-Quad) [m/z]: 1157.3 [M+H]<sup>+</sup>, **HRMS** (ESI-IT) [m/z]: 579.179534, calculated 579.179380 for  $\text{C}_{44}\text{H}_{54}\text{N}_{16}\text{O}_{22}$  [M+2H]<sup>2+</sup>, err [ppm] -0.266.

### FA-N<sub>3</sub>-6

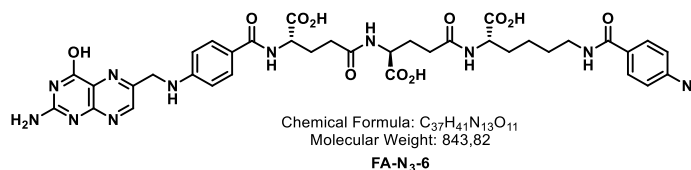

Following the general procedure A, 60 mg of **FA-N<sub>3</sub>-6** as of a deep yellow, amorph TFA salt were obtained.

**FA-N<sub>3</sub>-6**:  $^1\text{H-NMR}$  (500 MHz,  $\text{DMSO-}d_6$ )  $\delta$  [ppm]: 12.50 (s, 3H), 8.66 (d,  $J = 2.7$  Hz, 1H), 8.51 – 8.42 (m, 1H), 8.26 – 7.90 (m, 3H), 7.87 (dd,  $J = 8.7, 2.0$  Hz, 2H), 7.67 (dd,  $J = 8.3, 6.1$  Hz, 2H), 7.18 (dd,  $J = 8.8, 2.3$  Hz, 2H), 7.08 (s, 2H), 6.64 (dd,  $J = 8.8, 4.1$  Hz, 2H), 4.50 (s, 2H), 4.47 – 4.27 (m, 1H), 4.14 (tt,  $J = 9.5, 4.8$  Hz, 2H), 3.26 – 3.16 (m, 2H), 2.26 (ddd,  $J = 21.8, 15.0, 7.2$  Hz, 2H), 2.16 (dt,  $J = 15.7, 7.3$  Hz, 2H), 2.09 – 1.86 (m, 3H), 1.80 – 1.62 (m, 2H), 1.62 – 1.54 (m, 1H), 1.50 (s, 2H), 1.33 (s, 2H).  $^{13}\text{C-NMR}$  (176 MHz,  $\text{DMSO-}d_6$ )  $\delta$  [ppm]: 174.13, 173.79, 173.76, 173.75, 173.43, 173.40, 173.13, 171.80, 171.79, 171.68, 171.39, 171.37, 166.29, 165.10, 160.64, 158.18, 157.99, 153.43, 150.71, 149.16, 148.42, 142.05, 131.20, 129.06, 129.01, 127.95, 121.34, 118.82, 111.17, 52.62, 52.24, 52.00, 51.74, 51.49, 51.36, 45.87, 31.88, 31.71, 31.46, 31.41, 31.32, 30.71, 30.47, 30.43, 28.72, 28.70, 28.68, 27.20, 26.98, 26.96, 26.68, 26.51, 22.96. **LRMS** (ESI-Quad) [m/z]: 844.3 [M+H]<sup>+</sup>, **HRMS** (ESI-IT) [m/z]: 844.311777, calculated 844.312126 for  $\text{C}_{37}\text{H}_{42}\text{N}_{13}\text{O}_{11}$  [M+H]<sup>+</sup>, err [ppm] 0.413

**FA-N<sub>3</sub>-7**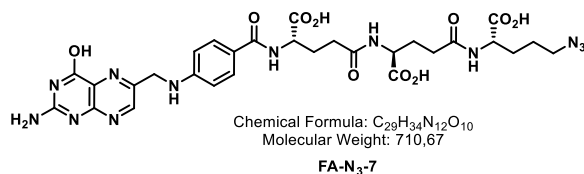

Following the general procedure A, 52 mg of **FA-N<sub>3</sub>-7** as a deep yellow, amorph TFA salt were obtained.

**FA-N<sub>3</sub>-7**: <sup>1</sup>H-NMR (500 MHz, DMSO-*d*<sub>6</sub>) δ [ppm]: 12.54 (s, 3H), 8.69 (s, 1H), 8.26 – 8.17 (m, 1H), 8.13 (ddd, *J* = 18.4, 7.7, 3.5 Hz, 2H), 7.67 (dd, *J* = 8.1, 6.1 Hz, 2H), 7.47 (s, 2H), 6.64 (dd, *J* = 8.8, 3.5 Hz, 2H), 4.52 (s, 2H), 4.49 – 4.37 (m, 1H), 4.35 – 4.25 (m, 1H), 4.21 – 4.09 (m, 2H), 3.31 (t, *J* = 6.5 Hz, 2H), 2.27 (ddt, *J* = 20.7, 13.2, 6.9 Hz, 2H), 2.22 – 2.11 (m, 2H), 2.02 – 1.85 (m, 3H), 1.80 – 1.66 (m, 2H), 1.65 – 1.48 (m, 3H). <sup>13</sup>C-NMR (176 MHz, DMSO-*d*<sub>6</sub>) δ [ppm]: 174.17, 174.14, 173.80, 173.76, 173.45, 173.25, 173.14, 172.91, 171.80, 171.66, 171.40, 166.39, 166.29, 161.02, 160.24, 158.77, 158.56, 158.36, 158.16, 153.13, 150.69, 149.91, 148.24, 129.08, 129.03, 129.00, 127.97, 121.41, 116.65, 114.99, 111.21, 52.63, 52.26, 51.99, 51.47, 51.31, 50.26, 50.24, 50.15, 49.95, 45.84, 31.88, 31.68, 31.45, 31.38, 31.32, 30.48, 30.44, 28.35, 28.23, 27.20, 27.10, 27.04, 26.97, 26.69, 26.50, 24.91, 24.77. LRMS (ESI-Quad) [m/z]: 711.3 [M+H]<sup>+</sup>, HRMS (ESI-IT) [m/z]: 711.2589, calculated 711.2594 for C<sub>29</sub>H<sub>35</sub>N<sub>12</sub>O<sub>10</sub> [M+H]<sup>+</sup>, err [ppm] 0.600.

**FA-N<sub>3</sub>-8**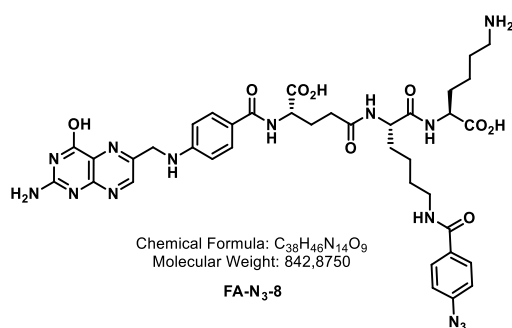

Following the general procedure A, 49 mg of **FA-N<sub>3</sub>-8** as a deep yellow, amorph TFA salt were obtained.

**FA-N<sub>3</sub>-8**: <sup>1</sup>H-NMR (700 MHz, DMSO-*d*<sub>6</sub>) δ [ppm]: 12.61 (s, 2H), 11.52 (s, 1H), 8.68 – 8.63 (m, 1H), 8.45 (q, *J* = 6.9, 6.3 Hz, 1H), 8.26 – 8.13 (m, 1H), 8.17 – 8.05 (m, 1H), 8.02 – 7.92 (m, 1H), 7.90 – 7.83 (m, 2H), 7.66 (dd, *J* = 8.8, 1.8 Hz, 2H), 7.62 (s, 3H), 7.26 – 7.13 (m, 2H), 6.95 (s, 2H), 6.64 (d, *J* = 8.9 Hz, 2H), 4.49 (s, 2H), 4.35 – 4.22 (m, 2H), 4.22 – 4.12 (m, 1H), 3.26 – 3.16 (m, 3H), 2.80 – 2.70 (m, 2H), 2.35 – 2.19 (m, 2H), 2.11 – 1.82 (m, 2H), 1.73 – 1.65 (m, 1H), 1.65 – 1.54 (m, 2H), 1.55 – 1.42 (m, 5H), 1.36 – 1.20 (m, 5H). <sup>13</sup>C-NMR (176 MHz, DMSO-*d*<sub>6</sub>) δ [ppm]: 173.99, 173.81, 173.77, 173.41, 173.38, 173.32, 172.10, 171.83, 171.80,

171.75, 171.55, 171.45, 166.70, 166.36, 166.29, 165.11, 158.18, 158.00, 157.81, 157.63, 153.66, 150.88, 150.77, 150.73, 148.71, 148.52, 142.07, 131.15, 128.99, 127.92, 121.33, 121.24, 120.91, 118.82, 117.60, 115.91, 111.15, 64.90, 52.55, 52.30, 52.07, 51.99, 51.31, 45.88, 39.87, 38.63, 32.03, 31.81, 31.79, 31.25, 30.47, 30.45, 30.34, 30.28, 28.82, 28.80, 28.65, 26.74, 26.59, 26.44, 26.42, 26.31, 26.28, 22.89, 22.83, 22.22, 22.20, 22.07, 15.16. **LRMS** (ESI-Quad) [m/z]: 843.4 [M+H]<sup>+</sup>, **HRMS** (ESI-IT) [m/z]: 843.364120, calculated 843.364496 for C<sub>38</sub>H<sub>47</sub>N<sub>14</sub>O<sub>9</sub> [M+H]<sup>+</sup>, err [ppm] 0.445.

### FA-N<sub>3</sub>-9

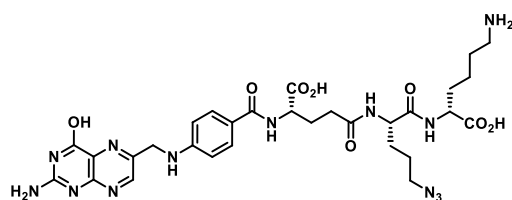

Chemical Formula: C<sub>30</sub>H<sub>39</sub>N<sub>13</sub>O<sub>8</sub>  
Molecular Weight: 709.73

FA-N<sub>3</sub>-9

Following the general procedure A, 53 mg of **FA-N<sub>3</sub>-9** as a deep yellow, amorph TFA salt were obtained.

**FA-N<sub>3</sub>-9**: <sup>1</sup>H-NMR (700 MHz, DMSO-*d*<sub>6</sub>) δ [ppm]: 12.60 (s, 2H), 11.50 (s, 1H), 8.70 – 8.59 (m, 1H), 8.28 – 8.06 (m, 2H), 8.02 (td, *J* = 14.9, 13.9, 8.2 Hz, 1H), 7.67 – 7.65 (m, 2H), 7.62 (s, 3H), 6.94 (s, 2H), 6.64 (d, *J* = 8.8 Hz, 2H), 4.49 (s, 2H), 4.39 – 4.27 (m, 2H), 4.22 – 4.10 (m, 1H), 3.29 (q, *J* = 6.7 Hz, 2H), 2.80 – 2.70 (m, 2H), 2.35 – 2.19 (m, 2H), 2.11 – 1.84 (m, 2H), 1.80 – 1.56 (m, 3H), 1.57 – 1.44 (m, 5H), 1.37 – 1.21 (m, 2H). <sup>13</sup>C-NMR (176 MHz, DMSO-*d*<sub>6</sub>) δ [ppm]: 174.14, 173.99, 173.82, 173.76, 173.37, 173.34, 173.28, 173.27, 172.12, 171.80, 171.76, 171.61, 171.45, 171.41, 171.21, 171.12, 166.72, 166.31, 166.28, 157.97, 157.79, 153.72, 150.79, 150.74, 148.64, 129.14, 129.09, 129.00, 127.93, 121.36, 121.25, 120.93, 117.88, 116.18, 111.16, 107.52, 64.91, 52.05, 52.00, 51.79, 51.41, 51.35, 50.42, 50.32, 50.30, 48.60, 45.90, 38.63, 38.60, 31.81, 31.77, 30.57, 30.49, 30.46, 30.33, 30.28, 29.60, 29.42, 28.95, 26.72, 26.59, 26.44, 26.43, 26.30, 24.80, 24.74, 22.25, 22.23, 22.10, 15.17. **LRMS** (ESI-Quad) [m/z]: 710.3 [M+H]<sup>+</sup>, **HRMS** (ESI-IT) [m/z]: 710.311272, calculated 710.311732 for C<sub>30</sub>H<sub>40</sub>N<sub>13</sub>O<sub>8</sub> [M+H]<sup>+</sup>, err [ppm] 0.647.

**FA-N<sub>3</sub>-10**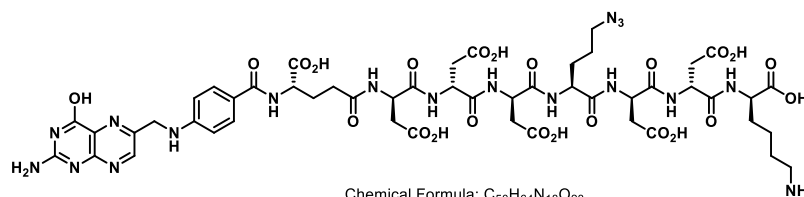

Chemical Formula: C<sub>50</sub>H<sub>64</sub>N<sub>18</sub>O<sub>23</sub>  
Molecular Weight: 1285.17

FA-N<sub>3</sub>-10

Following the general procedure A, 93 mg of **FA-N<sub>3</sub>-10** as a deep yellow, amorph TFA salt were obtained.

**FA-N<sub>3</sub>-10**: <sup>1</sup>H-NMR (700 MHz, DMSO-*d*<sub>6</sub>) δ [ppm]: 12.38 (s, 7H), 11.50 (s, 1H), 8.65 (s, 1H), 8.50 – 7.72 (m, 8H), 7.66 (d, *J* = 6.8 Hz, 2H), 7.60 (s, 3H), 6.94 (s, 2H), 6.64 (d, *J* = 8.8 Hz, 2H), 4.61 – 4.39 (m, 7H), 4.35 – 4.26 (m, 1H), 4.27 – 4.07 (m, 2H), 3.32 – 3.25 (m, 2H), 2.82 – 2.65 (m, 8H), 2.58 – 2.51 (m, 2H), 2.34 – 2.16 (m, 2H), 2.11 – 1.82 (m, 2H), 1.77 – 1.65 (m, 2H), 1.65 – 1.42 (m, 6H), 1.38 – 1.28 (m, 2H). <sup>13</sup>C-NMR (176 MHz, DMSO-*d*<sub>6</sub>) δ [ppm]: 174.08, 173.74, 173.72, 173.20, 173.18, 171.92, 171.89, 171.73, 171.70, 170.51, 170.36, 166.35, 160.89, 158.18, 157.99, 157.81, 157.62, 153.66, 150.77, 148.73, 148.53, 129.16, 129.01, 127.94, 121.30, 121.25, 117.56, 115.87, 111.17, 51.60, 50.33, 49.92, 49.69, 49.47, 45.89, 40.43, 38.69, 36.21, 35.97, 35.72, 35.67, 31.92, 31.88, 30.28, 30.25, 28.89, 26.57, 26.47, 26.41, 26.37, 24.40, 22.08. **LRMS** (ESI-Quad) [m/z]: 1285.6 [M+H]<sup>+</sup>, **HRMS** (ESI-IT) [m/z]: 643.22691, calculated 643.22682 for C<sub>50</sub>H<sub>66</sub>N<sub>18</sub>O<sub>23</sub> [M+2H]<sup>2+</sup>, err [ppm] 0.265.

**FA-N<sub>3</sub>-11**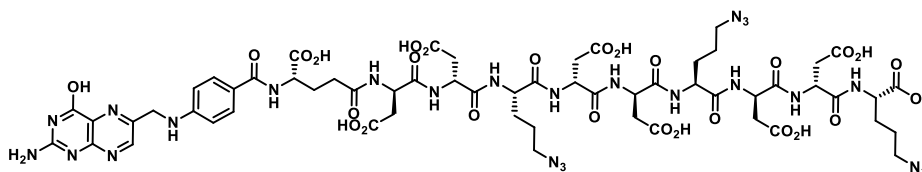

Chemical Formula: C<sub>68</sub>H<sub>73</sub>N<sub>25</sub>O<sub>27</sub>  
Molecular Weight: 1552.37

FA-N<sub>3</sub>-11

Following the general procedure A, 53 mg of **FA-N<sub>3</sub>-11** as a deep yellow, amorph TFA salt were obtained.

**FA-N<sub>3</sub>-11**: <sup>1</sup>H-NMR (700 MHz, DMSO-*d*<sub>6</sub>) δ [ppm]: 12.40 (s, 8H), 11.15 (s, 1H), 8.74 – 8.54 (m, 1H), 8.41 – 8.03 (m, 8H), 7.92 – 7.71 (m, 2H), 7.66 (d, *J* = 8.6 Hz, 2H), 7.32 – 6.80 (m, 2H), 6.64 (d, *J* = 8.6 Hz, 2H), 4.64 – 4.50 (m, 7H), 4.50 (s, 2H), 4.35 – 4.28 (m, 1H), 4.29 – 4.10 (m, 4H), 3.34 – 3.23 (m, 6H), 2.81 – 2.64 (m, 7H), 2.58 – 2.53 (m, 2H), 2.33 – 2.17 (m, 1H), 2.09 – 1.86 (m, 2H), 1.81 – 1.74 (m, 1H), 1.73 – 1.61 (m, 4H), 1.59 – 1.41 (m, 9H). <sup>13</sup>C-NMR (176 MHz, DMSO-*d*<sub>6</sub>) δ [ppm]: 173.75, 173.73, 172.97, 171.92, 171.81, 171.69, 171.66, 171.55, 171.03, 170.53, 170.44, 170.38, 170.30, 166.48, 166.33, 160.70, 158.33, 158.15,

157.95, 157.74, 153.58, 153.50, 150.91, 150.74, 149.07, 148.45, 129.20, 129.02, 127.95, 121.30, 117.16, 111.18, 52.08, 51.57, 51.36, 50.33, 50.18, 49.97, 49.62, 49.38, 49.32, 47.76, 45.87, 45.75, 36.25, 36.05, 32.35, 31.84, 30.25, 29.09, 28.96, 28.16, 27.59, 26.52, 25.99, 25.23, 24.72, 24.38, 23.74, 23.43. **LRMS** (ESI-Quad) [m/z]: 1552.5 [M+H]<sup>+</sup>, **HRMS** (ESI-IT) [m/z]: 776.762091, calculated 776.762663 for C<sub>58</sub>H<sub>75</sub>N<sub>25</sub>O<sub>27</sub> [M+2H]<sup>2+</sup>, err [ppm] 0.736.

### Synthesis of FA-SH-1

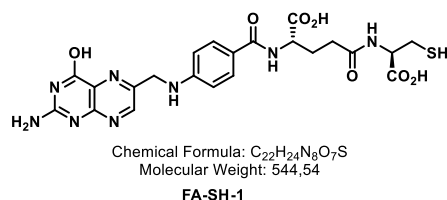

The solid-phase synthesis of the **FA-SH-1** was carried out manually on a scale of 484 μmol on Rapp 2-chlorotrityl resin (Rapp Polymere, Tübingen, Germany, 1.21 mmol/g) using fritted glass peptide synthesis vessels. For the loading of the resin a solution 567 mg (968 μmol, 2.0 equiv) Fmoc-Cys(Trt)-OH and 2.12 mL (19.36 mmol, 20 equiv) NMM in 7.5 mL dry DMF was reacted shaking it with the resin for 24 h at 23°C. The solvent was removed from the resin and the resin was reacted shaking it for 1 h at 23°C with a solution of 1 mL MeOH and 2.12 mL (19.36 mmol, 20 equiv) NMM in 7.5 mL dry DMF. The resin was washed with DMF, CH<sub>2</sub>Cl<sub>2</sub> and DMF (each 3x 10 mL, 2 min). Fmoc cleavage achieved by repeated reaction of the resin shaking it with a mixture of Piperidine in DMF (Pip:DMF/1:4, 3x 10 mL, 10 min) and subsequent washing of the resin with DMF, CH<sub>2</sub>Cl<sub>2</sub> and DMF (each 3x 10 mL, 2 min).

In parallel, 220 mg (1.94 mmol, 4.0 equiv) N-hydroxysuccinimide and 400 mg (1.94 mmol, 4.0 equiv) DCC, were added to a solution of 853 mg (1.94 mmol, 4.0 equiv) folic acid in 7.5 mL dry DMSO and stirred under light exclusion for 24 h at 23°C. The resulting suspension was filtered through a Whatman® filter (45 μm) onto the Cys-loaded resin presenting free amino groups (described above) and was reacted shaking it for 24 h at 23°C under light exclusion. The resin was washed with DMF, CH<sub>2</sub>Cl<sub>2</sub>, DMF, CH<sub>2</sub>Cl<sub>2</sub> (each 3x 10 mL, 2 min) and the assembled folic acid derivative was cleaved from the resin by repeated treatment with an Argon-flow-degassed mixture of TFA:TIPS:H<sub>2</sub>O:nPrSH/100:3:3:3 at 23°C (2x 5 mL, 1 h). Upon treatment with ice-cold Et<sub>2</sub>O (20 mL) a yellow precipitate formed, which was collected, redissolved in DMSO:H<sub>2</sub>O/1:3, filtered through a Whatman® filter (45 μm) and purified by RP prep HPLC (Thermo Fisher Scientific BDS Hypersil C18 RP-column 28105-259370, 5 μm, 250x30 mm, Flow: 25 mL/min, ACN:H<sub>2</sub>O + TFA/ 10:90 + 0.1% → 95:5 + 0.1% in 60 min) yielding after lyophilization 155.0 mg (285.6 μmol, 59%) of **FA-SH** as a deep-yellow solid.

**FA-SH-1:**  $^1\text{H-NMR}$  (700 MHz,  $\text{DMSO-}d_6$ )  $\delta$  [ppm]: 12.62 (s, 3H), 8.19 (d,  $J = 7.7$  Hz, 1H), 8.16 (d,  $J = 8.0$  Hz, 1H), 7.66 (d,  $J = 8.8$  Hz, 2H), 7.46 (s, 2H), 6.65 (d,  $J = 8.8$  Hz, 2H), 4.52 (s, 2H), 4.39 (td,  $J = 7.6, 4.7$  Hz, 1H), 4.32 (ddd,  $J = 9.8, 7.8, 4.7$  Hz, 1H), 2.83 (ddd,  $J = 13.3, 8.4, 4.6$  Hz, 1H), 2.76 – 2.66 (m, 1H), 2.44 (t,  $J = 8.5$  Hz, 1H), 2.28 (t,  $J = 7.7$  Hz, 2H), 2.08 (dtd,  $J = 12.3, 7.9, 4.7$  Hz, 1H), 1.91 (ddd,  $J = 13.7, 9.7, 7.2$  Hz, 1H)..  $^{13}\text{C-NMR}$  (176 MHz,  $\text{DMSO-}d_6$ )  $\delta$  [ppm]: 173.82, 171.78, 171.68, 166.33, 160.36, 153.24, 150.68, 149.84, 148.28, 129.02, 127.98, 121.45, 111.24, 54.34, 52.05, 45.86, 31.77, 26.56, 25.60. **LRMS** (ESI-Quad) [m/z]: 1086.5  $[\text{M}+\text{H}]^+$ , **HRMS** (ESI-IT) [m/z]: 1086.441323, calculated 1086.442337 for  $\text{C}_{22}\text{H}_{24}\text{N}_8\text{O}_7\text{S}$   $[\text{M}+\text{H}]^+$ , err [ppm] -0.933.

## Synthesis of LHRH derivatives

### General procedure B for the solid-supported synthesis of LHRH-derivatives

Solid-phase synthesis of the peptide was carried out on a scale of 150  $\mu\text{mol}$  with a Syro Multiple Peptide Synthesizer (MultiSynTech, Witten, Germany) on Rapp S RAM resin (Rapp Polymere, Tübingen, Germany, 0.23 mmol/g). Fmoc-protected amino acids were coupled to the resin using a fivefold excess of Fmoc-protected amino acid:TBTU: DiPEA/1:1:2 and coupling times of 1 h at 23°C. The side chain protections of the amino acids were as follows: Arg: Pbf; His: Trt; Ser and Tyr: t-Bu; Trp: Boc. The peptide was cleaved from the resin and deprotected by a treatment with TFA:TIPS:H<sub>2</sub>O/95:3:2 (10 ml/g resin) over 3 h at 23°C. After precipitation with t-butylmethyl ether, the resulting crude peptide was purified by preparative HPLC (RP-18) with water/acetonitrile gradients containing 0.1% TFA and characterized by analytical HPLC and MALDI-MS.

### Synthesis of LHRH

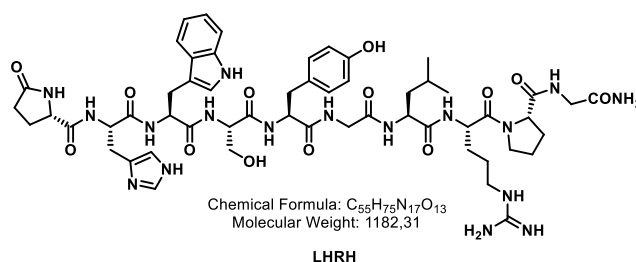

Following the general procedure B, 68 mg of **LHRH** as a white, amorph TFA salt were obtained.

**LHRH:** <sup>1</sup>H-NMR (700 MHz, DMSO-*d*<sub>6</sub>)  $\delta$  [ppm]: 14.06 (s, 2H), 10.79 (d, *J* = 2.4 Hz, 1H), 9.16 (s, 1H), 8.92 (s, 1H), 8.28 (d, *J* = 7.6 Hz, 1H), 8.26 – 8.23 (m, 2H), 8.20 (d, *J* = 7.5 Hz, 1H), 8.13 (d, *J* = 8.3 Hz, 1H), 8.07 (d, *J* = 7.6 Hz, 1H), 7.95 (d, *J* = 7.8 Hz, 1H), 7.90 (d, *J* = 8.2 Hz, 1H), 7.68 (s, 1H), 7.61 (d, *J* = 7.9 Hz, 1H), 7.48 (d, *J* = 5.4 Hz, 1H), 7.31 (d, *J* = 8.1 Hz, 1H), 7.27 (s, 1H), 7.13 (dd, *J* = 6.4, 2.2 Hz, 2H), 7.08 (d, *J* = 2.2 Hz, 1H), 7.05 – 7.01 (m, 3H), 6.94 – 6.90 (m, 1H), 6.80 (s, 0H), 6.64 – 6.60 (m, 2H), 5.03 (s, 1H), 4.62 (dtd, *J* = 24.4, 8.2, 4.9 Hz, 2H), 4.46 (qd, *J* = 9.3, 8.8, 5.9 Hz, 2H), 4.34 (ddt, *J* = 13.6, 7.7, 5.7 Hz, 2H), 4.27 (dd, *J* = 8.4, 4.9 Hz, 1H), 3.97 (dd, *J* = 8.8, 4.2 Hz, 1H), 3.73 (d, *J* = 5.7 Hz, 2H), 3.68 (dt, *J* = 9.5, 6.5 Hz, 1H), 3.65 – 3.50 (m, 5H), 3.15 (dd, *J* = 15.0, 4.4 Hz, 1H), 3.11 – 3.06 (m, 1H), 3.03 (dd, *J* = 15.4, 5.4 Hz, 1H), 2.99 – 2.93 (m, 2H), 2.89 (dd, *J* = 15.2, 8.3 Hz, 1H), 2.73 (dd, *J* = 14.1, 8.6 Hz, 1H), 2.18 – 2.11 (m, 1H), 2.10 – 1.99 (m, 3H), 1.98 – 1.89 (m, 1H), 1.81 (tdd, *J* = 9.5, 5.2, 2.5 Hz, 2H), 1.70 (ddt, *J* = 13.0, 9.1, 5.0 Hz, 2H), 1.58 (dq, *J* = 8.6, 6.5 Hz, 1H), 1.54 – 1.48 (m, 2H), 1.45 – 1.37 (m, 2H), 0.87 (d, *J* = 6.6 Hz, 3H), 0.84 (d, *J* = 6.6 Hz, 3H). <sup>13</sup>C-NMR (176 MHz, DMSO-*d*<sub>6</sub>)  $\delta$  [ppm]: 177.42, 172.44, 171.85, 171.81, 171.57, 171.24, 170.98, 169.90, 169.76, 169.55,

168.29, 157.99, 157.81, 157.63, 157.46, 156.63, 155.77, 136.01, 133.76, 130.09, 129.09, 127.55, 127.28, 123.67, 120.82, 118.54, 118.18, 116.92, 114.84, 111.20, 109.66, 73.11, 69.76, 65.60, 63.45, 61.71, 59.75, 58.19, 55.39, 55.09, 54.36, 53.26, 51.23, 50.66, 50.06, 48.71, 46.93, 42.05, 41.95, 41.78, 41.03, 40.57, 36.59, 29.07, 28.10, 27.71, 27.10, 26.82, 24.96, 24.57, 24.52, 24.08, 23.90, 23.24, 23.12, 21.49, 21.41, 20.43, 7.58. **LRMS** (MALDI) [m/z]: 1182.5 [M+H]<sup>+</sup>, **HRMS** (ESI-IT) [m/z]: 1182.5802, calculated 1182.5803 for C<sub>55</sub>H<sub>76</sub>N<sub>17</sub>O<sub>13</sub> [M+H]<sup>+</sup>, err [ppm] 0.1.

### Synthesis of L-Orn-N<sub>3</sub>-LHRH

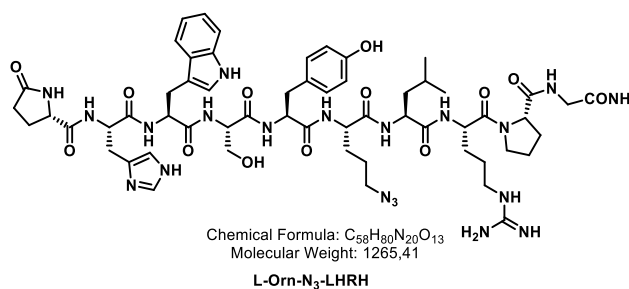

Following the general procedure B, 78 mg of **L-N<sub>3</sub>-Orn-LHRH** as a white, amorph TFA salt were obtained.

**L-Orn-N<sub>3</sub>-LHRH**: <sup>1</sup>H-NMR (700 MHz, DMSO-*d*<sub>6</sub>) δ [ppm]: 14.03 (s, 1H), 13.99 (s, 1H), 10.79 (d, *J* = 2.4 Hz, 1H), 9.16 (s, 1H), 8.93 (s, 1H), 8.29 (d, *J* = 7.6 Hz, 1H), 8.23 (t, *J* = 5.9 Hz, 1H), 8.21 (d, *J* = 7.4 Hz, 1H), 8.13 (d, *J* = 8.3 Hz, 1H), 8.11 (d, *J* = 8.3 Hz, 1H), 8.09 (d, *J* = 8.3 Hz, 1H), 8.05 (d, *J* = 7.6 Hz, 1H), 7.99 (d, *J* = 7.8 Hz, 1H), 7.68 (s, 1H), 7.62 (d, *J* = 8.0 Hz, 1H), 7.42 (d, *J* = 6.2 Hz, 1H), 7.35 – 7.29 (m, 1H), 7.27 (s, 1H), 7.14 (s, 1H), 7.12 (d, *J* = 2.4 Hz, 1H), 7.08 (d, *J* = 2.3 Hz, 1H), 6.91 (ddd, *J* = 7.9, 6.9, 1.0 Hz, 1H), 6.66 – 6.61 (m, 2H), 5.03 (s, 1H), 4.64 (td, *J* = 8.0, 4.5 Hz, 1H), 4.60 (td, *J* = 8.4, 5.4 Hz, 1H), 4.51 (q, *J* = 7.7 Hz, 1H), 4.45 (q, *J* = 7.4, 6.9 Hz, 1H), 4.36 – 4.30 (m, 3H), 4.27 (dd, *J* = 8.2, 4.9 Hz, 1H), 3.99 – 3.95 (m, 1H), 3.70 (dt, *J* = 9.9, 6.5 Hz, 1H), 3.64 – 3.55 (m, 4H), 3.54 – 3.49 (m, 2H), 3.24 (td, *J* = 6.8, 3.5 Hz, 2H), 3.17 – 3.13 (m, 1H), 3.08 (p, *J* = 6.5 Hz, 1H), 3.03 (dd, *J* = 15.3, 5.2 Hz, 1H), 2.98 (dd, *J* = 14.9, 9.1 Hz, 1H), 2.89 (dd, *J* = 15.1, 7.7 Hz, 2H), 2.73 (dd, *J* = 13.8, 8.6 Hz, 1H), 2.53 – 2.51 (m, 1H), 2.19 – 2.12 (m, 1H), 2.11 – 2.00 (m, 2H), 1.93 (td, *J* = 13.5, 12.2, 7.7 Hz, 1H), 1.80 (td, *J* = 12.3, 6.1 Hz, 2H), 1.74 – 1.66 (m, 2H), 1.63 – 1.42 (m, 4H), 1.41 – 1.31 (m, 2H), 0.86 (d, *J* = 6.6 Hz, 3H), 0.82 (d, *J* = 6.5 Hz, 3H). <sup>13</sup>C-NMR (176 MHz, DMSO-*d*<sub>6</sub>) δ [ppm]: 177.43, 172.48, 171.88, 171.84, 171.55, 171.00, 170.74, 170.71, 169.98, 169.71, 169.55, 158.13, 157.94, 157.76, 157.57, 156.60, 155.84, 136.02, 133.77, 130.10, 127.45, 127.30, 123.69, 120.85, 118.56, 118.19, 117.50, 116.93, 115.81, 114.85, 111.21, 109.65, 61.75, 59.73, 55.41, 54.96, 54.49, 53.27, 51.85, 51.25, 50.55, 50.27, 50.14, 46.97, 41.96, 40.82, 40.61, 36.93, 29.75, 29.09, 28.09, 27.06, 24.97, 24.59, 24.53, 24.47,



24.16, 23.21, 21.18. **LRMS** (MALDI) [m/z]: 1256.6 [M+H]<sup>+</sup>, **HRMS** (ESI-IT) [m/z]: 633.3182, calculated 633.3180 for C<sub>58</sub>H<sub>82</sub>N<sub>20</sub>O<sub>13</sub> [M+2H]<sup>2+</sup>, err [ppm] -0.300.

### Synthesis of D-Orn-N<sub>3</sub>-LHRH

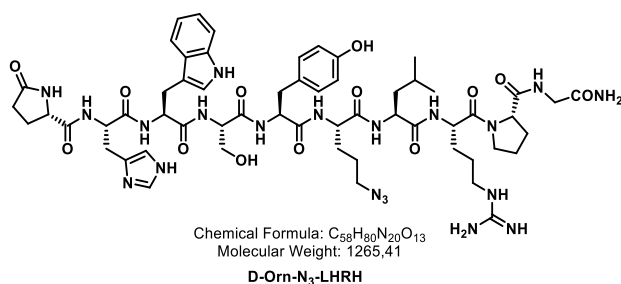

Following the general procedure B, 77 mg of **D-N<sub>3</sub>-Orn-LHRH** as a white, amorph TFA salt were obtained.

**D- Orn-N<sub>3</sub>-LHRH:** <sup>1</sup>H-NMR (700 MHz, DMSO-*d*<sub>6</sub>) δ [ppm]: 14.08 (s, 2H), 10.79 (d, *J* = 2.5 Hz, 1H), 9.17 (s, 1H), 8.93 (d, *J* = 1.5 Hz, 1H), 8.29 (d, *J* = 7.6 Hz, 1H), 8.23 (t, *J* = 5.9 Hz, 1H), 8.20 (d, *J* = 7.4 Hz, 1H), 8.14 (d, *J* = 8.3 Hz, 1H), 8.11 (d, *J* = 8.2 Hz, 1H), 8.09 (d, *J* = 8.1 Hz, 1H), 8.05 (d, *J* = 7.6 Hz, 1H), 8.00 (d, *J* = 7.8 Hz, 1H), 7.68 (s, 1H), 7.62 (dd, *J* = 7.9, 1.1 Hz, 1H), 7.49 (q, *J* = 6.1 Hz, 1H), 7.35 (s, 0H), 7.31 (dd, *J* = 8.0, 0.9 Hz, 1H), 7.27 (d, *J* = 1.3 Hz, 1H), 7.14 (d, *J* = 2.2 Hz, 1H), 7.12 (d, *J* = 2.4 Hz, 1H), 7.08 (s, 1H), 7.06 – 7.02 (m, 3H), 6.91 (ddd, *J* = 7.9, 6.9, 1.0 Hz, 1H), 6.80 (s, 1H), 6.64 – 6.61 (m, 2H), 5.05 (s, 1H), 4.64 (ddd, *J* = 9.1, 7.7, 4.5 Hz, 1H), 4.60 (td, *J* = 8.3, 5.3 Hz, 1H), 4.51 (td, *J* = 8.0, 5.8 Hz, 1H), 4.45 (q, *J* = 7.4, 6.9 Hz, 1H), 4.38 – 4.30 (m, 3H), 4.26 (dd, *J* = 8.2, 4.9 Hz, 1H), 3.97 (ddd, *J* = 8.7, 4.2, 1.1 Hz, 1H), 3.70 (dt, *J* = 9.8, 6.5 Hz, 1H), 3.64 – 3.55 (m, 3H), 3.54 – 3.49 (m, 2H), 3.24 (td, *J* = 6.8, 3.6 Hz, 2H), 3.15 (d, *J* = 10.6 Hz, 1H), 3.07 (dt, *J* = 12.3, 6.5 Hz, 2H), 3.03 (dd, *J* = 15.3, 5.2 Hz, 1H), 2.98 (dd, *J* = 14.9, 9.1 Hz, 1H), 2.93 – 2.86 (m, 2H), 2.73 (dd, *J* = 13.8, 8.5 Hz, 1H), 2.18 – 2.12 (m, 1H), 2.11 – 2.06 (m, 1H), 2.06 – 1.99 (m, 2H), 1.96 – 1.90 (m, 1H), 1.80 (ddt, *J* = 12.8, 10.7, 6.2 Hz, 2H), 1.73 – 1.66 (m, 2H), 1.64 – 1.41 (m, 7H), 1.36 (dddd, *J* = 25.3, 13.5, 9.5, 5.7 Hz, 2H), 0.86 (d, *J* = 6.6 Hz, 3H), 0.82 (d, *J* = 6.6 Hz, 3H). <sup>13</sup>C-NMR (176 MHz, DMSO-*d*<sub>6</sub>) δ [ppm]: 177.43, 172.48, 171.89, 171.84, 171.56, 171.01, 170.75, 170.71, 170.00, 169.72, 169.57, 158.42, 158.23, 158.04, 157.84, 156.66, 155.85, 136.03, 133.77, 130.10, 129.11, 127.46, 127.30, 123.70, 120.85, 118.56, 118.19, 117.18, 116.94, 115.51, 114.86, 111.21, 109.66, 61.75, 59.74, 55.41, 54.96, 54.50, 53.28, 51.86, 51.26, 50.56, 50.28, 50.16, 46.97, 41.96, 40.81, 40.61, 36.94, 29.75, 29.09, 29.05, 28.08, 27.75, 27.07, 24.98, 24.59, 24.54, 24.47, 24.16, 23.21, 21.18. **LRMS** (MALDI) [m/z]: 1265.7 [M+H]<sup>+</sup>, **HRMS** (ESI-IT) [m/z]: 633.3182, calculated 633.3180 for C<sub>58</sub>H<sub>82</sub>N<sub>20</sub>O<sub>13</sub> [M+2H]<sup>2+</sup>, err [ppm] -0.300.

## Synthesis of D-Orn-N<sub>3</sub>-Gose

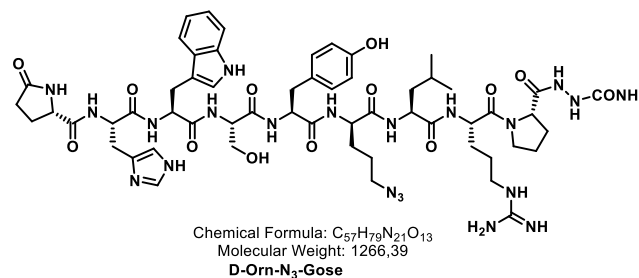

Rapp S RAM resin (100  $\mu$ mol, 0.23 mmol/g) was treated for 10 min with 20% piperidine in DMF at 23°C to remove the Fmoc group, followed by washing with DMF (5x 5 mL, 2 min) and DCM (5x 5 mL, 2 min). 162 mg (1.0 mmol, 10.0 equiv) carbonyldiimidazol in dry DCM (3 mL) were added and the mixture was incubated for 3 h at 23°C with shaking, followed by washing with DCM (5x 5 mL, 2 min) and DMF (5x 5 mL, 2 min). The resin was then treated with hydrazine in DMF (5 mL, ca. 2 M)<sup>ix</sup> for 1 h at 23°C.<sup>x</sup> Afterwards the resin was washed with DMF (5x 5 mL, 2 min) and the peptide was assembled on a Syro Multiple Peptide Synthesizer, cleaved, purified and characterized as described in the general procedure B, yielding 20 mg of **D-Orn-N<sub>3</sub>-Gose** as a TFA salt.

**D-Orn-N<sub>3</sub>-Gose:** <sup>1</sup>H-NMR (700 MHz, DMSO-*d*<sub>6</sub>)  $\delta$  [ppm]: 14.09 (s, 2H), 10.80 (d, *J* = 2.4 Hz, 1H), 10.68 (s, 1H), 9.76 (d, *J* = 21.4 Hz, 1H), 9.18 (s, 1H), 8.93 (d, *J* = 1.4 Hz, 1H), 8.29 (d, *J* = 7.6 Hz, 2H), 8.23 (d, *J* = 7.3 Hz, 1H), 8.14 (d, *J* = 8.3 Hz, 1H), 8.10 (t, *J* = 7.7 Hz, 2H), 8.06 (d, *J* = 7.5 Hz, 1H), 8.00 (d, *J* = 7.8 Hz, 1H), 7.80 (s, 1H), 7.68 (s, 1H), 7.62 (d, *J* = 8.0 Hz, 1H), 7.51 (t, *J* = 5.5 Hz, 1H), 7.33 – 7.29 (m, 1H), 7.27 (d, *J* = 1.3 Hz, 1H), 7.19 (s, 1H), 7.14 – 7.09 (m, 2H), 7.07 – 7.00 (m, 4H), 6.91 (ddd, *J* = 7.9, 6.9, 1.0 Hz, 1H), 6.65 – 6.62 (m, 2H), 5.89 (s, 2H), 5.05 (s, 1H), 4.64 (td, *J* = 8.0, 4.4 Hz, 1H), 4.59 (dd, *J* = 8.4, 5.3 Hz, 1H), 4.51 (td, *J* = 8.1, 5.8 Hz, 1H), 4.46 – 4.41 (m, 3), 4.34 (ddt, *J* = 15.8, 7.8, 5.5 Hz, 1H), 4.19 (s, 1H), 3.97 (ddd, *J* = 8.7, 4.2, 1.1 Hz, 1H), 3.73 (d, *J* = 6.9 Hz, 1H), 3.59 (dd, *J* = 10.6, 6.1 Hz, 2H), 3.51 (dp, *J* = 11.1, 6.1, 5.3 Hz, 2H), 3.28 – 3.19 (m, 1H), 3.15 (dd, *J* = 14.7, 4.2 Hz, 1H), 3.10 – 3.05 (m, 1H), 3.03 (dd, *J* = 15.3, 5.1 Hz, 1H), 2.98 (dd, *J* = 14.9, 9.1 Hz, 1H), 2.89 (dt, *J* = 11.2, 6.6 Hz, 1H), 2.77 – 2.69 (m, 1H), 2.55 (t, *J* = 5.5 Hz, 3H), 2.15 (ddt, *J* = 12.4, 10.1, 8.0 Hz, 1H), 2.11 – 1.99 (m, 3H), 1.84 – 1.76 (m, 2H), 1.73 – 1.64 (m, 2H), 1.63 – 1.41 (m, 7H), 1.41 – 1.30 (m, 3H), 0.86 (d, *J* = 6.6 Hz, 3H), 0.82 (d, *J* = 6.5 Hz, 3H). <sup>13</sup>C-NMR (176 MHz, DMSO-*d*<sub>6</sub>)  $\delta$  [ppm]: 177.42, 172.47, 171.90, 171.54, 171.45, 170.73, 170.69, 170.07, 169.71, 169.56, 168.77, 158.29, 158.11, 157.92, 157.73, 156.67, 155.84, 136.02, 133.76, 130.09, 129.10, 127.43, 127.29, 123.69, 120.83, 118.55, 118.18,

<sup>ix</sup> 5 mL Hydrazine-DMF solution were prepared from 10 mL 1 M hydrazine solution in THF by adding 5 mL DMF and and evaporation of the THF at 20 mmHg and 37°C over 30 min.

<sup>x</sup> Synthesis was designed analog to a procedure of Verhelst *et al.*<sup>19</sup>

117.51, 116.93, 115.82, 114.85, 111.20, 109.64, 61.74, 58.35, 55.39, 54.94, 54.50, 53.27, 51.82, 51.25, 50.51, 50.27, 50.14, 46.98, 40.80, 40.59, 36.93, 34.33, 29.76, 29.08, 28.91, 28.07, 27.73, 27.06, 24.96, 24.68, 24.46, 24.14, 23.19, 21.17, 20.41, 20.10. **LRMS** (MALDI) [m/z]: 1266.8 [M+H]<sup>+</sup>, **HRMS** (ESI-IT) [m/z]: 633.8156, calculated 633.8156 for C<sub>57</sub>H<sub>75</sub>N<sub>21</sub>O<sub>13</sub> [M+ 2H]<sup>2+</sup>, err [ppm] 0.0.

## Synthesis of imaging probes

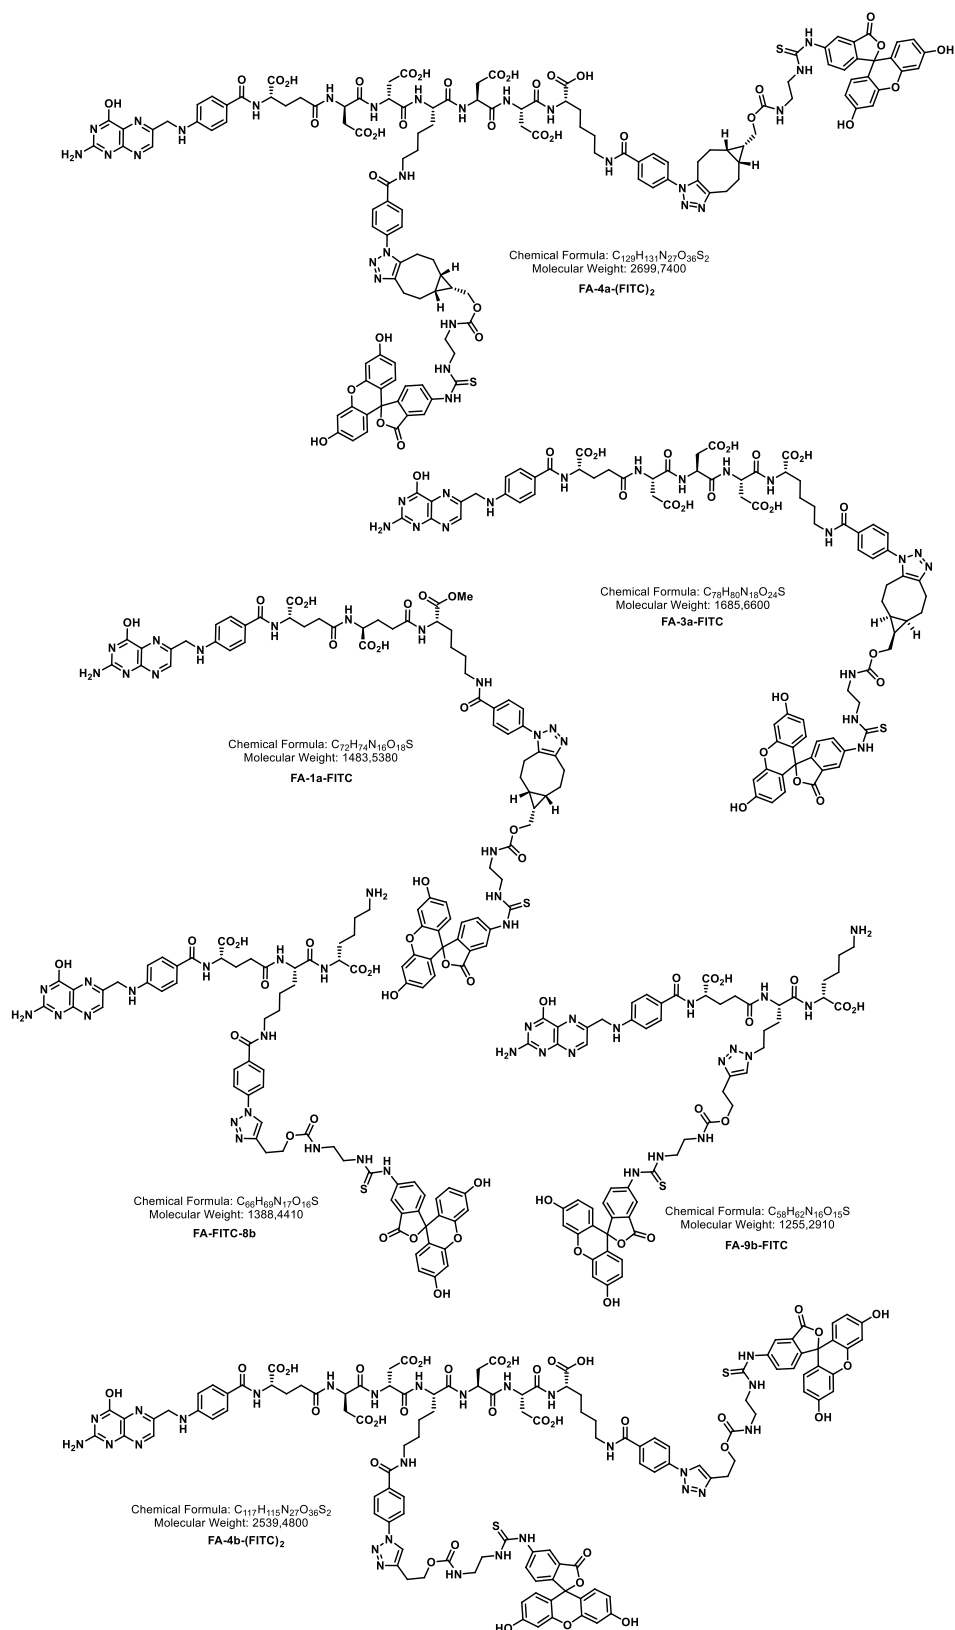

Figure S1: Folate-Fluorescein conjugates synthesized in this study.

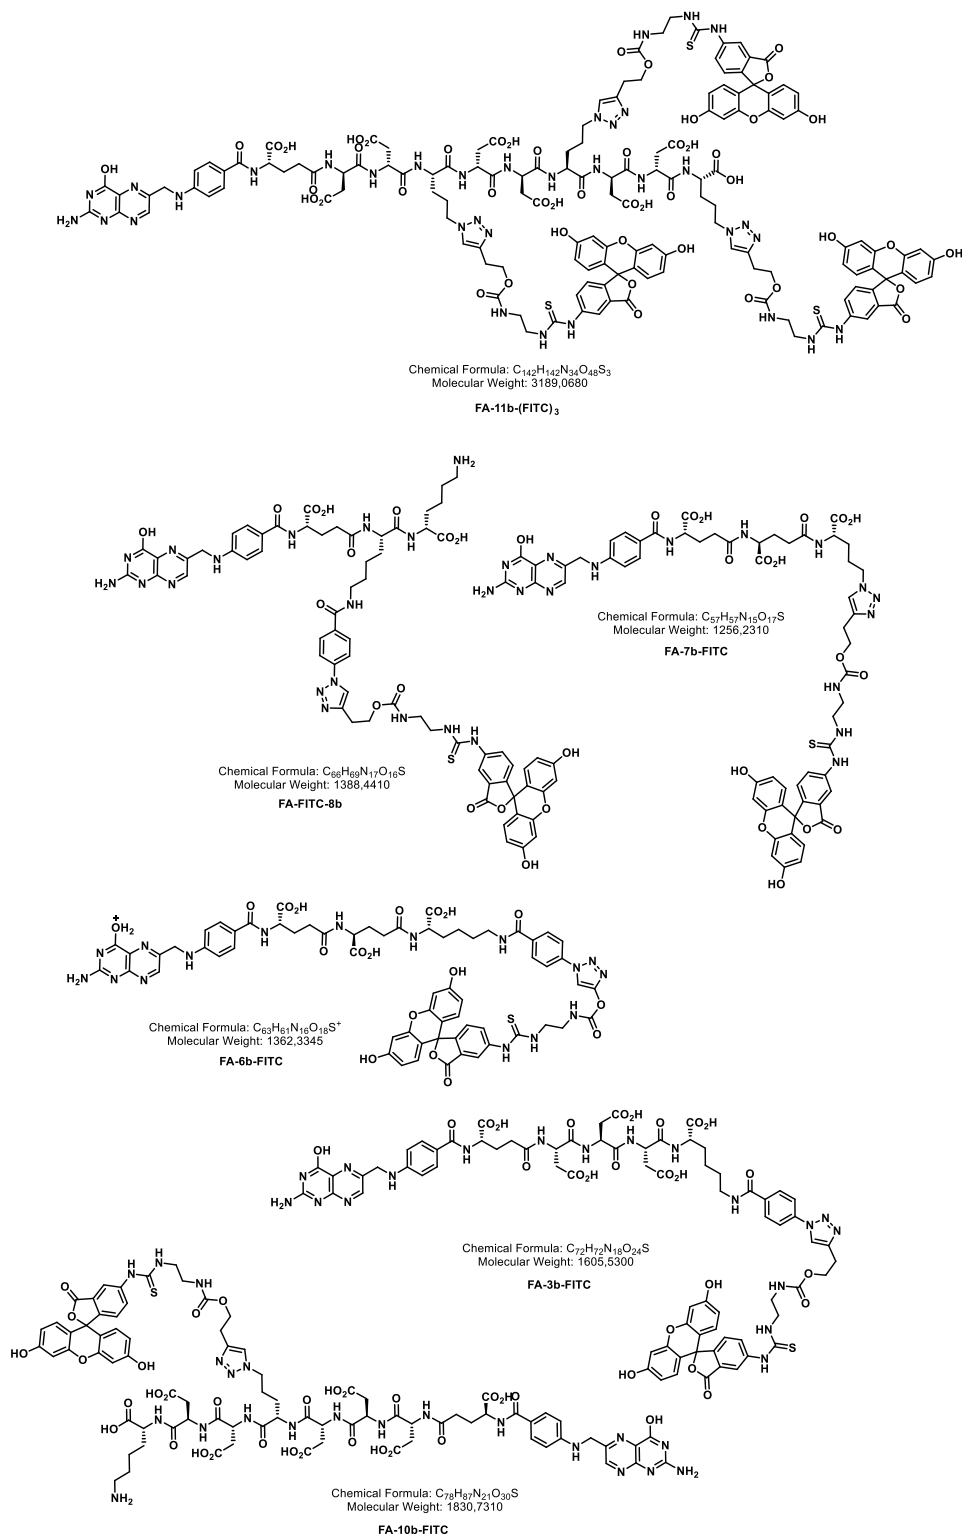

Figure S2: Continuation 1: Folate-Fluorescein conjugates synthesized in this study.

## Synthesis of clickable Fluorescence dyes

### Synthesis of BCN-FTIC (43) - ((1R,8S,9s)-bicyclo[6.1.0]non-4-yn-9-yl)methyl (2-(3-(3',6'-dihydroxy-3-oxo-3H-spiro[isobenzofuran-1,9'-xanthen]-5/6-yl)thioureido)ethyl)carbamate

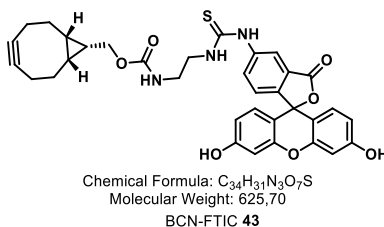

To a solution of 50 mg (128  $\mu$ mol, 1.0 equiv) 5/6-fluoresceinthioisocyanate (FTIC) in 1.3 mL dry DMF was added 20.5 mg (128  $\mu$ mol, 1.0 equiv) N-Boc-1,2-ethyldiamine and the mixture was stirred for 19 h at 23°C. The reaction mixture was diluted with toluene (5 mL), concentrated and coevaporated with toluene (4x 5 mL) under reduced pressure. The residue was taken up in 130  $\mu$ L TFA and stirred for 1.5 h at 23°C. The mixture was diluted with toluene (5 mL), concentrated and coevaporated with toluene (3x 4 mL) under reduced pressure and the residue was dried in HV. The residue was then dissolved in 1.3 mL dry DMF, 43  $\mu$ L (384  $\mu$ mol, 3.0 equiv) NMM and 40 mg (128  $\mu$ mol, 1.0 equiv) **BNC-pNPC** were added and the mixture was stirred for 48 h at 23°C. The reaction mixture was diluted with toluene (5 mL), concentrated and coevaporated with toluene (5x 5 mL) under reduced pressure. The residue was purified by preparative thin-layer chromatography (CH<sub>2</sub>Cl<sub>2</sub>:MeOH/9:1) yielding 36.6 mg (58.49  $\mu$ mol, 46%) of BCN-FTIC **43** as a deep orange, amorph solid.

**BCN-FTIC (43):** TLC (CH<sub>2</sub>Cl<sub>2</sub>:MeOH/9:1) R<sub>f</sub>: 0.35 [UV<sup>254</sup>, Vis], <sup>1</sup>H-NMR (500 MHz, MeOD-*d*<sub>4</sub>)  $\delta$  [ppm]: 8.07 (s, 1H), 7.75 (d, *J* = 7.8 Hz, 1H), 7.17 (d, *J* = 8.2 Hz, 1H), 6.74 (d, *J* = 8.7 Hz, 2H), 6.68 (d, *J* = 2.4 Hz, 2H), 6.55 (dd, *J* = 8.7, 2.4 Hz, 2H), 4.10 (d, *J* = 8.1 Hz, 2H), 3.80 – 3.66 (m, 2H), 3.37 (t, *J* = 5.8 Hz, 1H), 3.35 (s, 1H), 2.17 (dq, *J* = 32.4, 14.9, 14.3 Hz, 6H), 1.53 (q, *J* = 8.5 Hz, 2H), 1.34 (dt, *J* = 14.5, 7.3 Hz, 1H), 0.93 – 0.82 (m, 2H). <sup>13</sup>C-NMR (126 MHz, MeOD-*d*<sub>4</sub>)  $\delta$  [ppm]: 183.13, 171.18, 162.56, 159.80, 154.60, 141.86, 131.82, 130.55, 126.33, 120.97, 114.26, 111.85, 103.55, 99.50, 92.45, 66.78, 63.97, 55.78, 40.93, 30.15, 21.92, 21.40, 18.91. LRMS (ESI-Quad) [m/z]: 626.2 [M+H]<sup>+</sup>, HRMS (ESI-IT) [m/z]: 626.194754, calculated 626.195548 for C<sub>34</sub>H<sub>32</sub>N<sub>3</sub>O<sub>7</sub>S [M+H]<sup>+</sup>, err [ppm] 1.268.

**Synthesis of Homopropargyl-FTIC (42)** - But-3-yn-1-yl (2-(3-(3',6'-dihydroxy-3-oxo-3H-spiro[isobenzofuran-1,9'-xanthen]-5/6-yl)thioureido)ethyl)carbamate

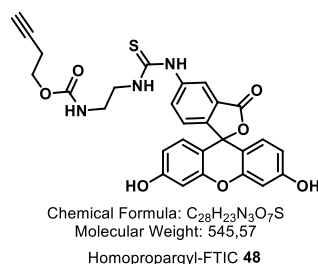

To a solution of 50 mg (128  $\mu$ mol, 1.0 equiv) 5/6-fluoresceinthioisocyanate (FTIC) in 1.3 mL dry DMF was added 20.5 mg (128  $\mu$ mol, 1.0 equiv) N-Boc-1,2-ethyldiamine and the mixture was stirred for 19 h at 23°C. The reaction mixture was diluted with toluene (5 mL), concentrated and coevaporated with toluene (4x 5 mL) under reduced pressure. The residue was taken up in 130  $\mu$ L TFA and stirred for 1.5 h at 23°C. The mixture was diluted with toluene (5 mL), concentrated and coevaporated with toluene (3x 4 mL) under reduced pressure and the residue was dried in HV. The residue was then dissolved in 1.3 mL dry DMF, 43  $\mu$ L (384  $\mu$ mol, 3.0 equiv) NMM and 30 mg (128  $\mu$ mol, 1.0 equiv) **24** were added and the mixture was stirred for 48 h at 23°C. The reaction mixture was diluted with toluene (5 mL), concentrated and coevaporated with toluene (5x 5 mL) under reduced pressure. The residue was purified by preparative thin-layer chromatography ( $CH_2Cl_2$ :MeOH/9:1) followed by purification by RP prep HPLC (Phenomenex Gemini C18 RP-column 00G-4435-PO-AX, 5  $\mu$ m, 110 A, 250x21.20 mm, Flow: 9 mL/min, ACN:H<sub>2</sub>O/ 20:90  $\rightarrow$  95:5 in 45 min) yielding after lyophilization 43.6 mg (80.0  $\mu$ mol, 63%) of Homopropargyl-FTIC **42** as a deep orange, amorphous solid.

**Homopropargyl-FTIC (42):** TLC ( $CH_2Cl_2$ :MeOH/9:1)  $R_f$ : 0.20 [UV<sup>254</sup>, Vis], <sup>1</sup>H-NMR (500 MHz, DMSO-*d*<sub>6</sub>)  $\delta$  [ppm]: 8.13 (s, 1H), 7.80 – 7.66 (m, 1H), 7.17 (d,  $J$  = 8.2 Hz, 1H), 6.73 – 6.63 (m, 4H), 6.55 (ddd,  $J$  = 8.7, 3.9, 2.4 Hz, 2H), 4.15 – 4.05 (m, 2H), 3.76 (d,  $J$  = 20.0 Hz, 2H), 3.38 (t,  $J$  = 6.0 Hz, 2H), 2.81 (s, 10H), 2.48 (td,  $J$  = 6.8, 2.6 Hz, 1H). **LRMS** (ESI-Quad) [m/z]: 546.1 [M+H]<sup>+</sup>, **HRMS** (ESI-IT) [m/z]: 546.132346, calculated 546.132948 for  $C_{28}H_{24}N_3O_7S$  [M+H]<sup>+</sup>, err [ppm] 1.102.

## Synthesis of Folate-Fluorescein Conjugates

General procedure C for the synthesis of Folate-Fluorescein Conjugates via copper-free click reaction.

The corresponding **FA-N<sub>3</sub>** (1.1 equiv) was dissolved in DMSO (0.2 M), a solution of BCN-FITC **43** (1.0 equiv) in DMSO (0.2 M) was added and the mixture was stirred for 4-20 h at 23°C under light exclusion until complete conversion was monitored by LCMS. The reaction mixture was diluted with 100  $\mu$ L of MeOH, filtered through a Whatman filter (45  $\mu$ m) and directly purified by RP prep HPLC (Phenomenex Gemini C18 RP-column 00G-4435-PO-AX, 5  $\mu$ m, 110 A, 250 $\times$ 21.20 mm, Flow: 9 mL/min, ACN:H<sub>2</sub>O + 0.1% TFA/ 10:90  $\rightarrow$  95:5 in 45 min) yielding the Folate-Fluorescein Conjugates after lyophilization as a deep orange, amorphous solids.

### FA-4a-(FITC)<sub>2</sub>

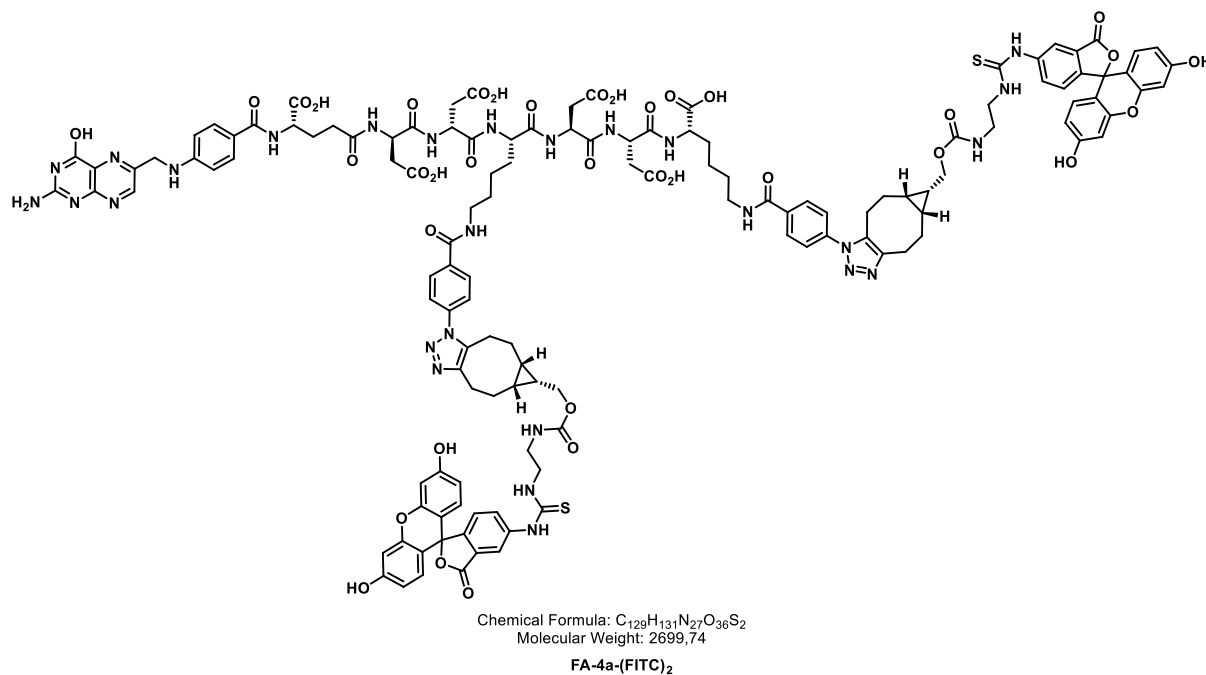

Applying **FA-N<sub>3</sub>-4** to the general procedure C, 1.4 mg (0.518  $\mu$ mol, 17%) **FA-4a-(FITC)<sub>2</sub>** were obtained as a mixture of diastereomers as deep-orange solid.

**FA-4a-(FITC)<sub>2</sub>**: LRMS (ESI-Quad) [m/z]: 1350.4 [M+2H]<sup>2+</sup>, HRMS (ESI-IT) [m/z]: 898.61675, calculated 898.61689 for C<sub>129</sub>H<sub>128</sub>N<sub>27</sub>O<sub>36</sub>S<sub>2</sub> [M-3H]<sup>3-</sup>, err [ppm] -0.155.



**FA-3a-FITC**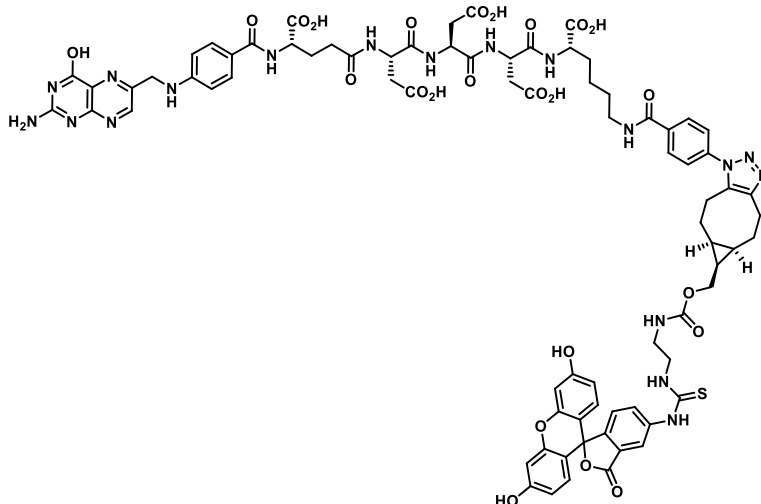

Chemical Formula:  $C_{78}H_{80}N_{18}O_{24}S$   
Molecular Weight: 1685,66

**FA-3a-FITC**

Applying **FA-N<sub>3</sub>-3** to the general procedure C, 4.5 mg (2.669  $\mu$ mol, 30%) **FA-3a-FITC** were obtained as a mixture of diastereomers as a deep-orange solid.

**FA-3a-FITC**: LRMS (ESI-Quad) [m/z]: 1685.5 [M+H]<sup>+</sup>, HRMS (ESI-IT) [m/z]: 841.25711, calculated 841.25840 for  $C_{78}H_{78}N_{18}O_{24}S$  [M-2H]<sup>2-</sup>, err [ppm] -1.53.

**FA-1a-FITC**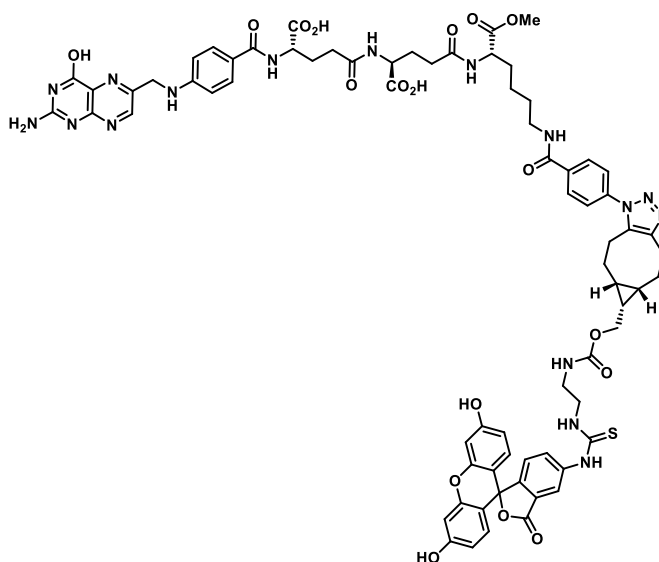

Chemical Formula:  $C_{72}H_{74}N_{18}O_{18}S$   
Molecular Weight: 1483,54

**FA-1a-FITC**

Applying **FA-N<sub>3</sub>-1** to the general procedure C, 1.7 mg (1.145  $\mu\text{mol}$ , 25%) **FA-1a-FITC** were obtained as a mixture of diastereomers as a deep-orange solid.

**FA-1a-FITC: LRMS** (ESI-Quad) [m/z]: 1484.6 [M+H]<sup>+</sup>, **HRMS** (ESI-IT) [m/z]:742.2617, calculated 742.2617 for C<sub>72</sub>H<sub>76</sub>N<sub>16</sub>O<sub>18</sub>S [M+2H]<sup>2+</sup>, err [ppm] 0.0.

General procedure D for the synthesis of Folate-Fluorescein Conjugates via copper-mediated click reaction.

The corresponding **FA-N<sub>3</sub>** (1.1 equiv) and Homopropargyl-FITC **42** (1.0 equiv) were dissolved in a mixture of DMSO:H<sub>2</sub>O:tBuOH/2:1:1 (0.025 M) were added DiPEA (6.0 eq), TBTA (0.1 eq, 10  $\mu\text{L}$  from a stock solution in DMSO), CuSO<sub>4</sub> (0.05 eq, 10  $\mu\text{L}$  from a stock solution in H<sub>2</sub>O) and sodium ascorbate (0.5 eq, 10  $\mu\text{L}$  from a stock solution in H<sub>2</sub>O) and the mixture was stirred under light exclusion for 4-24 h at 23°C until complete conversion was monitored by LCMS. The reaction mixture was diluted with 100  $\mu\text{L}$  of MeOH, filtered through a Whatman filter (45  $\mu\text{m}$ ) and directly purified by RP prep HPLC (Phenomenex Gemini C18 RP-column 00G-4435-PO-AX, 5  $\mu\text{m}$ , 110 A, 250×21.20 mm, Flow: 9 mL/min, ACN:H<sub>2</sub>O + 0.1% TFA/ 10:90 → 95:5 in 45 min) yielding the Folate-Fluorescein Conjugates after lyophilization as a deep orange, amorph solids.

### FA-9b-FITC

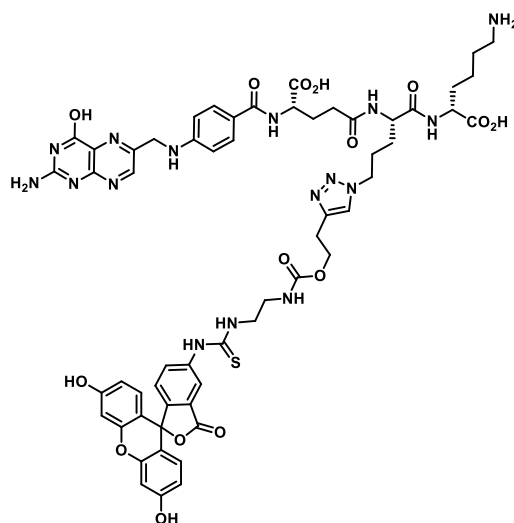

Chemical Formula: C<sub>58</sub>H<sub>62</sub>N<sub>16</sub>O<sub>15</sub>S  
Molecular Weight: 1255,29

**FA-9b-FITC**

Applying **FA-N<sub>3</sub>-9** to the general procedure D, 2.9 mg (2.36  $\mu\text{mol}$ , 65%) **FA-FITC-9b** were obtained as a TFA salt as a deep-orange solid.

**FA-9b-FITC:** LRMS (ESI-Quad) [m/z]: 1256.3 [M+H]<sup>+</sup>, HRMS (ESI-IT) [m/z]: 628.22296, calculated 628.22234 for C<sub>58</sub>H<sub>64</sub>N<sub>16</sub>O<sub>15</sub>S [M+2H]<sup>2+</sup>, err [ppm] 0.986.

### FA-11b-(FITC)<sub>3</sub>

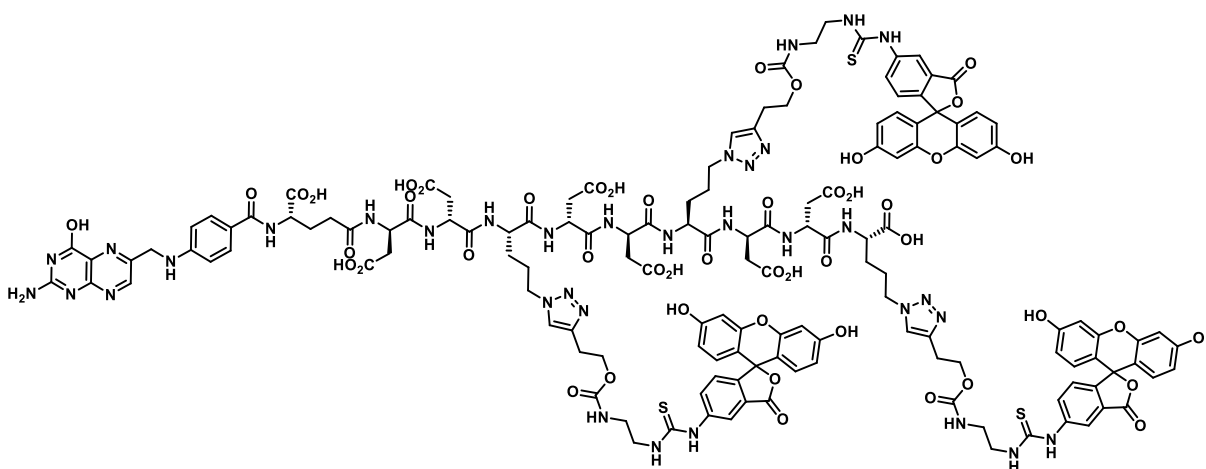

Chemical Formula: C<sub>142</sub>H<sub>142</sub>N<sub>34</sub>O<sub>48</sub>S<sub>3</sub>  
Molecular Weight: 3189.07

FA-11b-(FITC)<sub>3</sub>

Applying **FA-N<sub>3</sub>-11** to the general procedure D, 3.0 mg (0.94 μmol, 25%) **FA-11b-(FITC)<sub>3</sub>** were obtained as a deep-orange solid.

**FA-11b-(FITC)<sub>3</sub>:** LRMS (ESI-Quad) [m/z]: 1064.32 [M+3H]<sup>3+</sup>, HRMS (ESI-IT) [m/z]: 1063.9719, calculated 1063.9715 for C<sub>142</sub>H<sub>145</sub>N<sub>34</sub>O<sub>48</sub>S<sub>3</sub> [M+3H]<sup>3+</sup>, err [ppm] 0.376.

### FA-8b-FITC

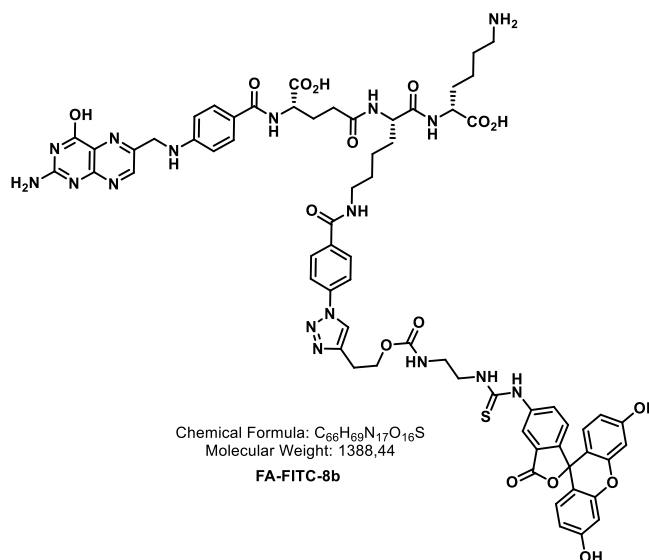

Chemical Formula: C<sub>66</sub>H<sub>69</sub>N<sub>17</sub>O<sub>16</sub>S  
Molecular Weight: 1388.44

FA-FITC-8b

Applying **FA-N<sub>3</sub>-8** to the general procedure D, 1.7 mg (1.25  $\mu\text{mol}$ , 34%) **FA-8b-FITC** were obtained as a TFA salt as a deep-orange solid.

**FA-8b-FITC: LRMS** (ESI-Quad) [m/z]: 694.6 [M+2H]<sup>2+</sup>, **HRMS** (ESI-IT) [m/z]: 694.7487, calculated 694.7487 for C<sub>66</sub>H<sub>71</sub>N<sub>17</sub>O<sub>16</sub>S [M+2H]<sup>2+</sup>, err [ppm] 0.0.

### FA-10b-FITC

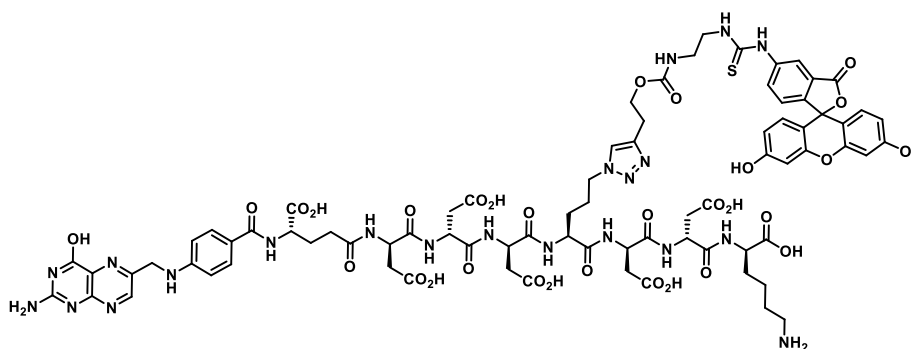

Chemical Formula: C<sub>78</sub>H<sub>87</sub>N<sub>21</sub>O<sub>30</sub>S  
Molecular Weight: 1830,73

**FA-10b-FITC**

Applying **FA-N<sub>3</sub>-10** to the general procedure D, 3.8 mg (2.08  $\mu\text{mol}$ , 57%) **FA-10b-FITC** were obtained as a deep-orange solid.

**FA-10b-FITC: LRMS** (ESI-Quad) [m/z]: 915.9 [M+2H]<sup>2+</sup>, **HRMS** (ESI-IT) [m/z]: 915.7897, calculated 915.7897 for C<sub>78</sub>H<sub>89</sub>N<sub>21</sub>O<sub>30</sub>S [M+2H]<sup>2+</sup>, err [ppm] 0.0.

### FA-7b-FITC

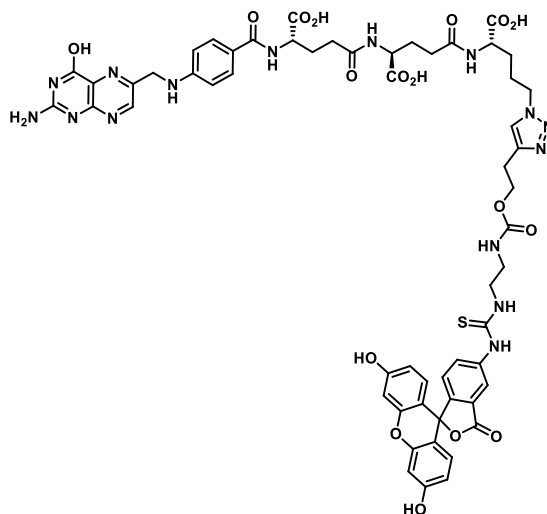

Chemical Formula: C<sub>57</sub>H<sub>57</sub>N<sub>15</sub>O<sub>17</sub>S  
Molecular Weight: 1256,23

**FA-7b-FITC**

Applying **FA-N<sub>3</sub>-7** to the general procedure D, 3.8 mg (2.08 μmol, 57%) **FA-FITC-7b** were obtained as a deep-orange solid.

**FA-7b-FITC: LRMS** (ESI-Quad) [m/z]: 915.8 [M+2H]<sup>2+</sup>, **HRMS** (ESI-IT) [m/z]: 1256.3869, calculated 1256.3850 for C<sub>57</sub>H<sub>58</sub>N<sub>15</sub>O<sub>17</sub>S [M+H]<sup>+</sup>, err [ppm] -1.5.

### FA-6b-FITC

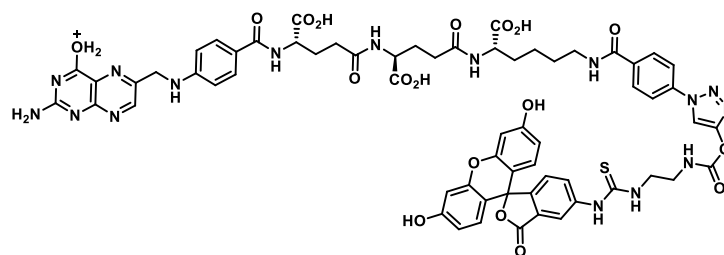

Chemical Formula: C<sub>63</sub>H<sub>61</sub>N<sub>16</sub>O<sub>18</sub>S<sup>+</sup>  
Molecular Weight: 1362.33

FA-6b-FITC

Applying **FA-N<sub>3</sub>-6** to the general procedure D, 3.8 mg (2.08 μmol, 57%) **FA-FITC-6b** were obtained as a deep-orange solid.

**FA-6b-FITC: LRMS** (ESI-Quad) [m/z]: 681.3 [M+2H]<sup>2+</sup>. **HRMS** (ESI-IT) [m/z]: 1361.4061, calculated 1361.4065 for C<sub>63</sub>H<sub>61</sub>N<sub>16</sub>O<sub>18</sub>S [M+H]<sup>+</sup>, err [ppm] -0.29.

### FA-3b-FITC

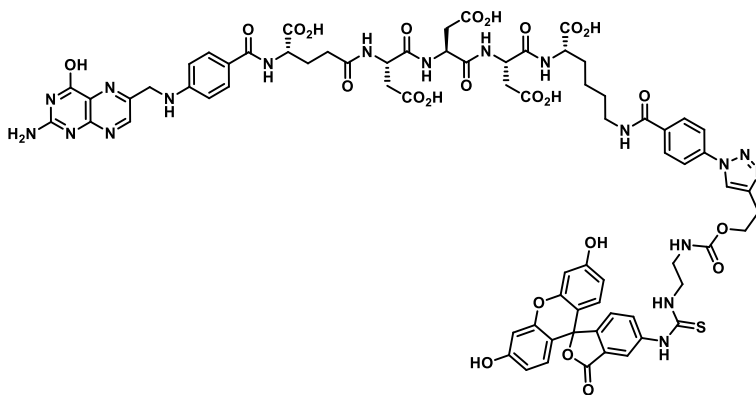

Chemical Formula: C<sub>72</sub>H<sub>72</sub>N<sub>18</sub>O<sub>24</sub>S  
Molecular Weight: 1605.53

FA-3b-FITC

Applying **FA-N<sub>3</sub>-3** to the general procedure D, 2.0 mg (1.24 μmol, 52%) **FA-3b-FITC** were obtained as a deep-orange solid.

**FA-3b-FITC: LRMS** (ESI-Quad) [m/z]: 803.2 [M+2H]<sup>2+</sup>, **HRMS** (ESI-IT) [m/z]: 803.2417, calculated 803.2417 for C<sub>72</sub>H<sub>74</sub>N<sub>18</sub>O<sub>24</sub>S [M+2H]<sup>2+</sup>, err [ppm] 0.0.

**FA-4b-(FITC)<sub>2</sub>**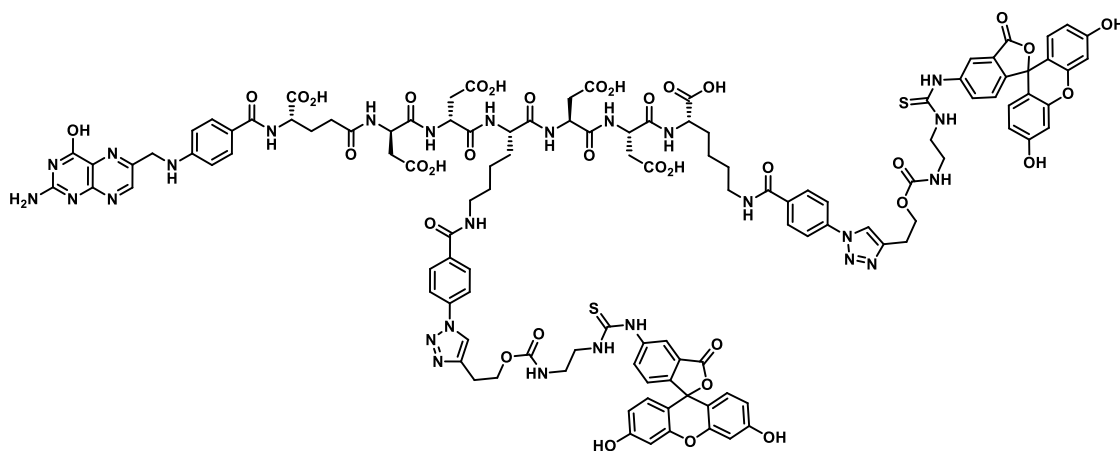

Chemical Formula: C<sub>117</sub>H<sub>115</sub>N<sub>27</sub>O<sub>36</sub>S<sub>2</sub>  
 Molecular Weight: 2539,48

**FA-4b-(FITC)<sub>2</sub>**

Applying **FA-N<sub>3</sub>-4** to the general procedure D, 1.4 mg (0.551 μmol, 27%) **FA-4b-(FITC)<sub>2</sub>** were obtained as a deep-orange solid.

**FA-4b-(FITC)<sub>2</sub>**: **LRMS** (ESI-Quad) [m/z]: 1270.3 [M+2H]<sup>2+</sup>, **HRMS** (ESI-IT) [m/z]: 1269.8793, calculated 1269.8792 for C<sub>117</sub>H<sub>117</sub>N<sub>27</sub>O<sub>36</sub>S<sub>2</sub> [M+H]<sup>+</sup>, err [ppm] -0.078.

## Conjugation of Ratjadone derivatives to carrier molecules

### Biotin-Ratjadone Conjugate

#### Synthesis of Biotin-PEG<sub>3</sub>-16S-Aminoratjadone (**36**)

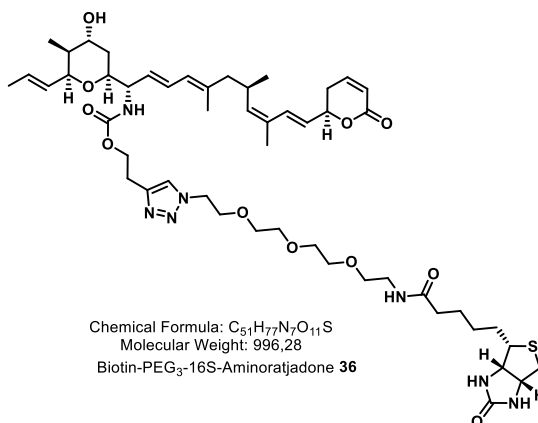

To a solution of 3.6 mg (6.53  $\mu$ mol, 1.0 equiv) of 16S-aminoratjadone derivative **22** and 3.2 mg (7.18  $\mu$ mol, 1.1 equiv) N-(2-(2-(2-(2-azidoethoxy)ethoxy)ethoxy)ethyl)-5-((3aS,4S,6aR)-2-oxohexahydro-1H-thieno[3,4-d]imidazol-4-yl)pentanamide in a mixture of DMSO:H<sub>2</sub>O:tBuOH/2:1:1 were added 9.5  $\mu$ L (19.6  $\mu$ mol, 3.0 equiv) DiPEA, 10  $\mu$ L (0.345 mg, 0.1 equiv) of a stock solution (34.5 mg/1 mL) of TBTA in DMSO, 10  $\mu$ L (0.052 mg, 0.05 equiv) of a stock solution (5.2 mg/1 mL) of CuSO<sub>4</sub> in H<sub>2</sub>O and 10  $\mu$ L (0.646 mg, 0.1 equiv) of a stock solution (64.6 mg/1 mL) of sodium ascorbate in H<sub>2</sub>O. The mixture was stirred for 24 h at 23°C, before it was diluted with 100  $\mu$ L of and 200  $\mu$ L of DMSO and was purified by RP prep HPLC (Phenomenex Gemini C18 RP-column 00G-4435-PO-AX, 5  $\mu$ m, 110 A, 250×21.20 mm, Flow: 9 mL/min, ACN:H<sub>2</sub>O + 0.1% TFA/ 10:90 → 95:5 in 60 min) yielding after lyophilization 2.5 mg (2.51  $\mu$ mol, 39%) of Biotin-PEG<sub>3</sub>-16S-aminoratjadone **36** as a pale-yellow, amorph solid.

**Biotin-PEG<sub>3</sub>-16S-Aminoratjadone (36):** <sup>1</sup>H-NMR (700 MHz, DMSO-*d*<sub>6</sub>)  $\delta$  [ppm]: 7.90 (s, 1H), 7.81 (t, *J* = 5.6 Hz, 1H), 7.13 (d, *J* = 8.9 Hz, 1H), 7.04 (ddd, *J* = 9.7, 5.6, 2.8 Hz, 1H), 6.75 (d, *J* = 15.6 Hz, 1H), 6.43 – 6.28 (m, 3H), 6.01 – 5.93 (m, 1H), 5.79 – 5.72 (m, 2H), 5.61 – 5.51 (m, 1H), 5.48 (dd, *J* = 15.2, 6.8 Hz, 1H), 5.36 (ddd, *J* = 15.4, 5.4, 1.6 Hz, 1H), 5.24 (d, *J* = 9.5 Hz, 1H), 5.10 (dt, *J* = 10.5, 5.1 Hz, 1H), 4.46 (t, *J* = 5.3 Hz, 2H), 4.30 (dd, *J* = 7.5, 5.1 Hz, 1H), 4.26 – 4.22 (m, 1H), 4.17 (t, *J* = 6.9 Hz, 2H), 4.12 (dd, *J* = 7.6, 4.5 Hz, 1H), 4.07 – 3.99 (m, 1H), 3.79 (t, *J* = 5.3 Hz, 2H), 3.73 – 3.69 (m, 1H), 3.65 (dd, *J* = 10.5, 5.0 Hz, 1H), 3.51 (dd, *J* = 5.9, 3.3 Hz, 4H), 3.48 (d, *J* = 2.8 Hz, 4H), 3.47 (s, 3H), 3.38 (t, *J* = 6.0 Hz, 2H), 3.17 (q, *J* = 5.9 Hz, 2H), 3.11 – 3.06 (m, 1H), 2.91 (t, *J* = 7.0 Hz, 2H), 2.88 – 2.83 (m, 1H), 2.81 (dd, *J* = 12.4, 5.1 Hz, 1H), 2.57 (d, *J* = 12.4 Hz, 1H), 2.56 – 2.51 (m, 1H), 2.45 (ddt, *J* = 18.6, 10.6, 2.7 Hz, 1H), 2.05 (t, *J* = 7.4 Hz, 2H), 1.98 (d, *J* = 7.1 Hz, 2H),

1.75 (s, 3H), 1.68 (s, 3H), 1.63 (d,  $J = 6.5$  Hz, 3H), 1.62 – 1.56 (m, 1H), 1.53 – 1.38 (m, 5H), 1.34 – 1.21 (m, 4H), 0.87 (d,  $J = 6.6$  Hz, 3H), 0.74 (d,  $J = 7.1$  Hz, 3H). **<sup>13</sup>C-NMR** (176 MHz, DMSO-*d*<sub>6</sub>)  $\delta$  [ppm]: 172.08, 163.52, 162.67, 155.75, 146.69, 143.07, 138.49, 136.28, 131.20, 129.35, 129.04, 127.25, 126.78, 125.80, 124.59, 122.92, 120.33, 107.51, 77.81, 73.62, 73.52, 69.68, 69.61, 69.56, 69.53, 69.15, 68.73, 68.18, 62.78, 61.02, 59.17, 56.48, 55.40, 49.27, 47.25, 40.02, 38.65, 38.42, 35.08, 29.58, 29.40, 29.21, 28.18, 28.03, 25.49, 25.24, 20.78, 20.07, 17.62, 16.44, 11.09. **LRMS** (ESI-Quad) [m/z]: 996.5 [M+H]<sup>+</sup>, **HRMS** (ESI-IT) [m/z]: 996.546028, calculated 996.547454 for C<sub>51</sub>H<sub>78</sub>N<sub>7</sub>O<sub>11</sub>S [M+H]<sup>+</sup>, err [ppm] -1.431



## Folate-Aminoratjadone Conjugates

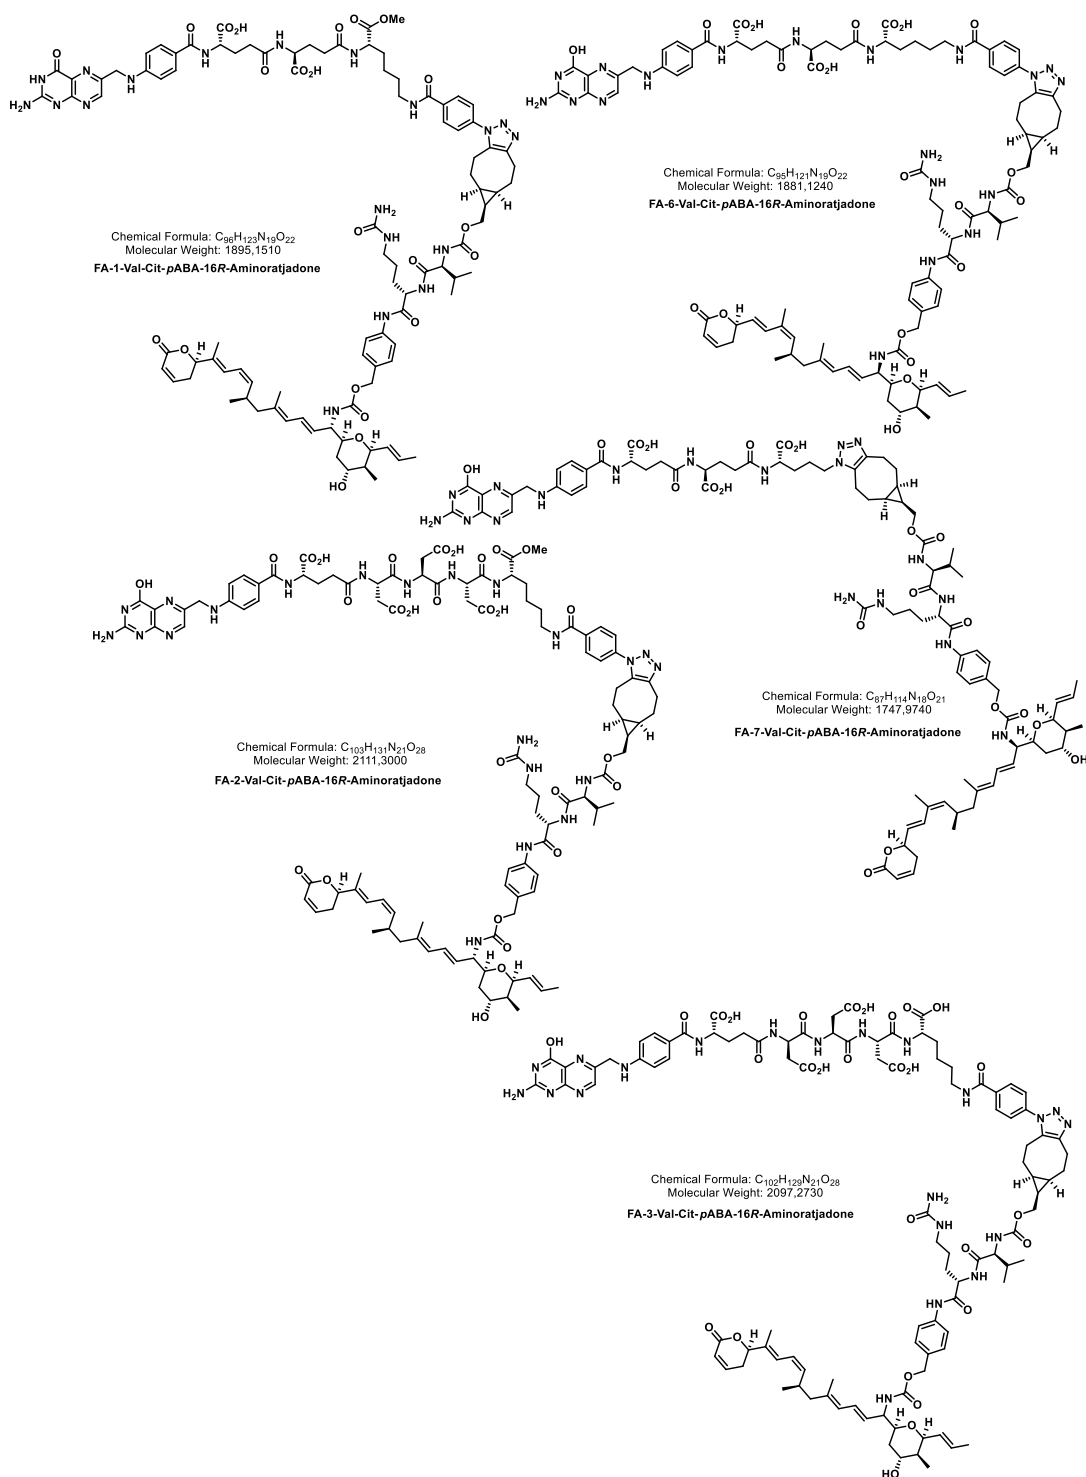

Figure S3: Folate-Aminoratjadone conjugates synthesized in this study.

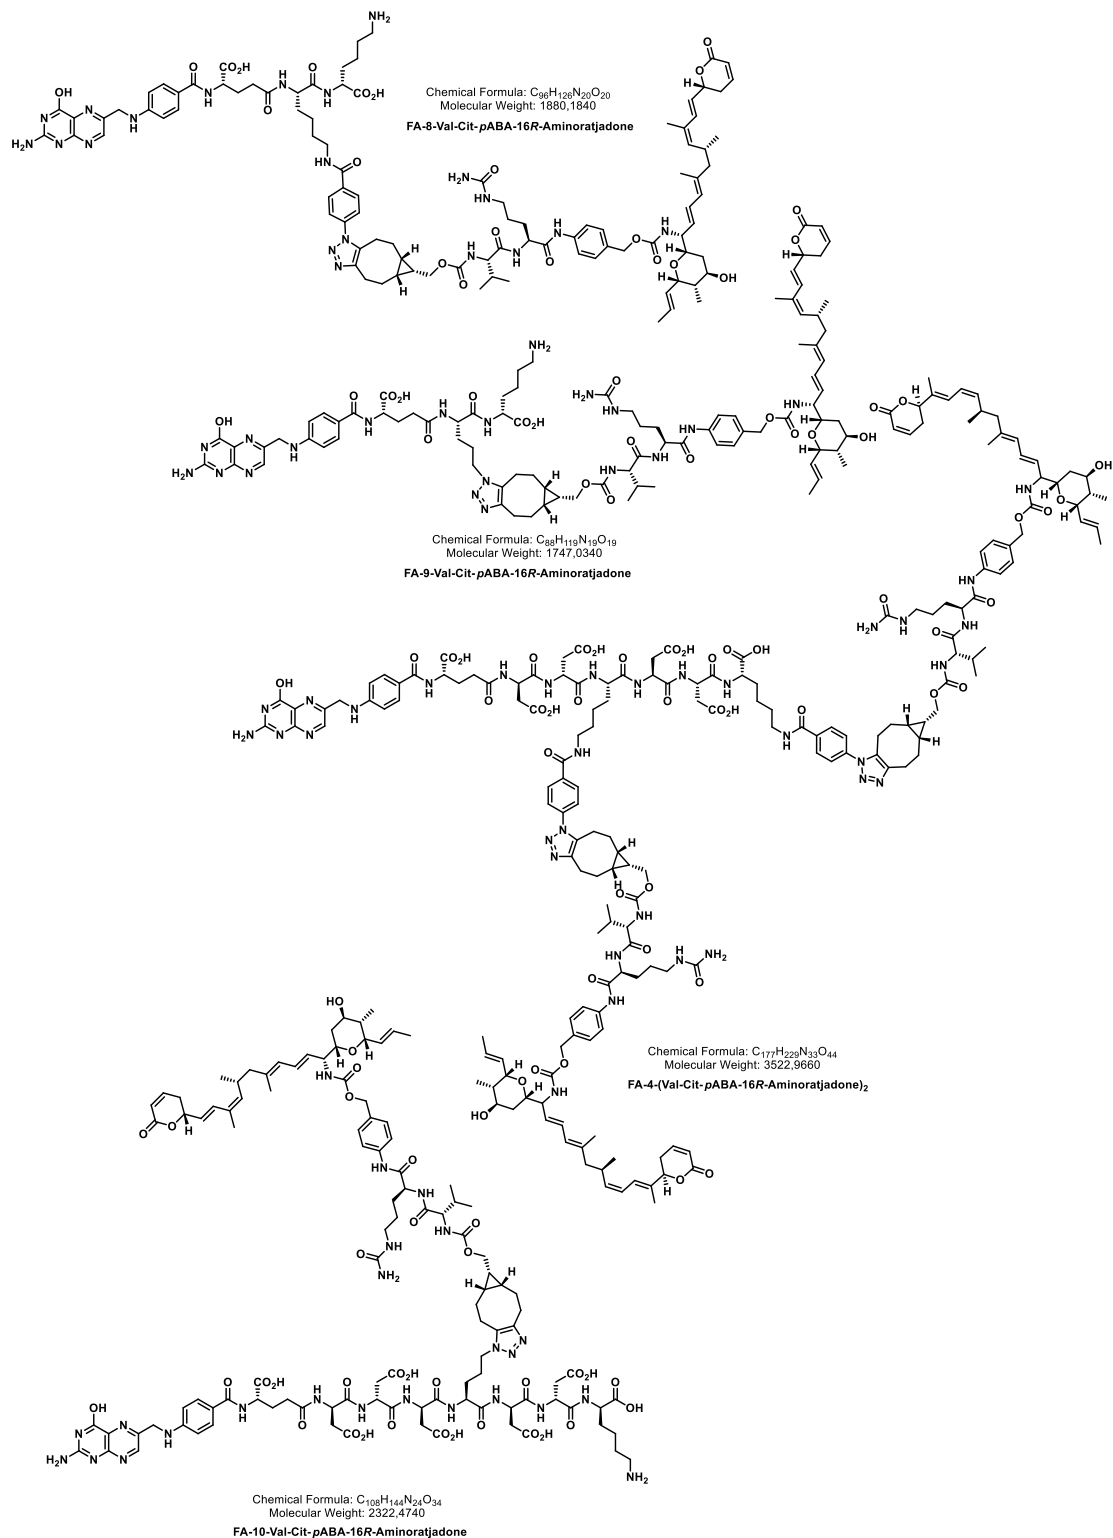

Figure S4: Continuation 1: Folate-Aminoratjadone conjugates synthesized in this study.

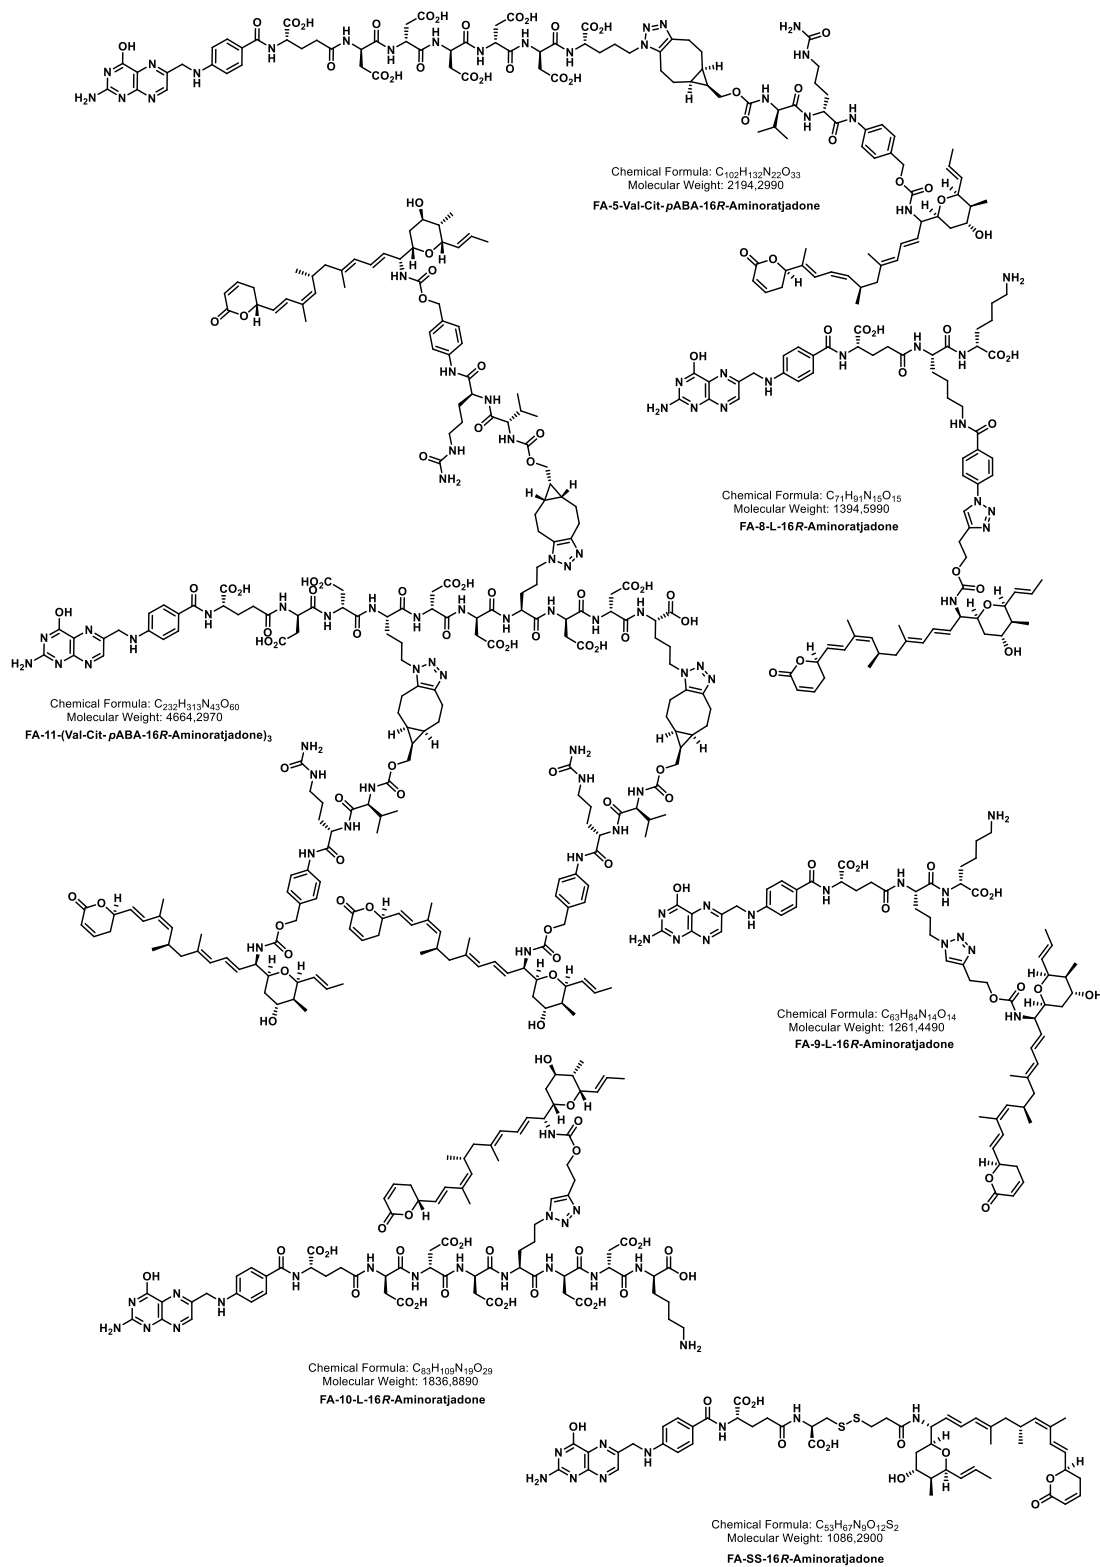

Figure S5: Continuation 2: Folate-Aminorotjadone conjugates synthesized in this study.

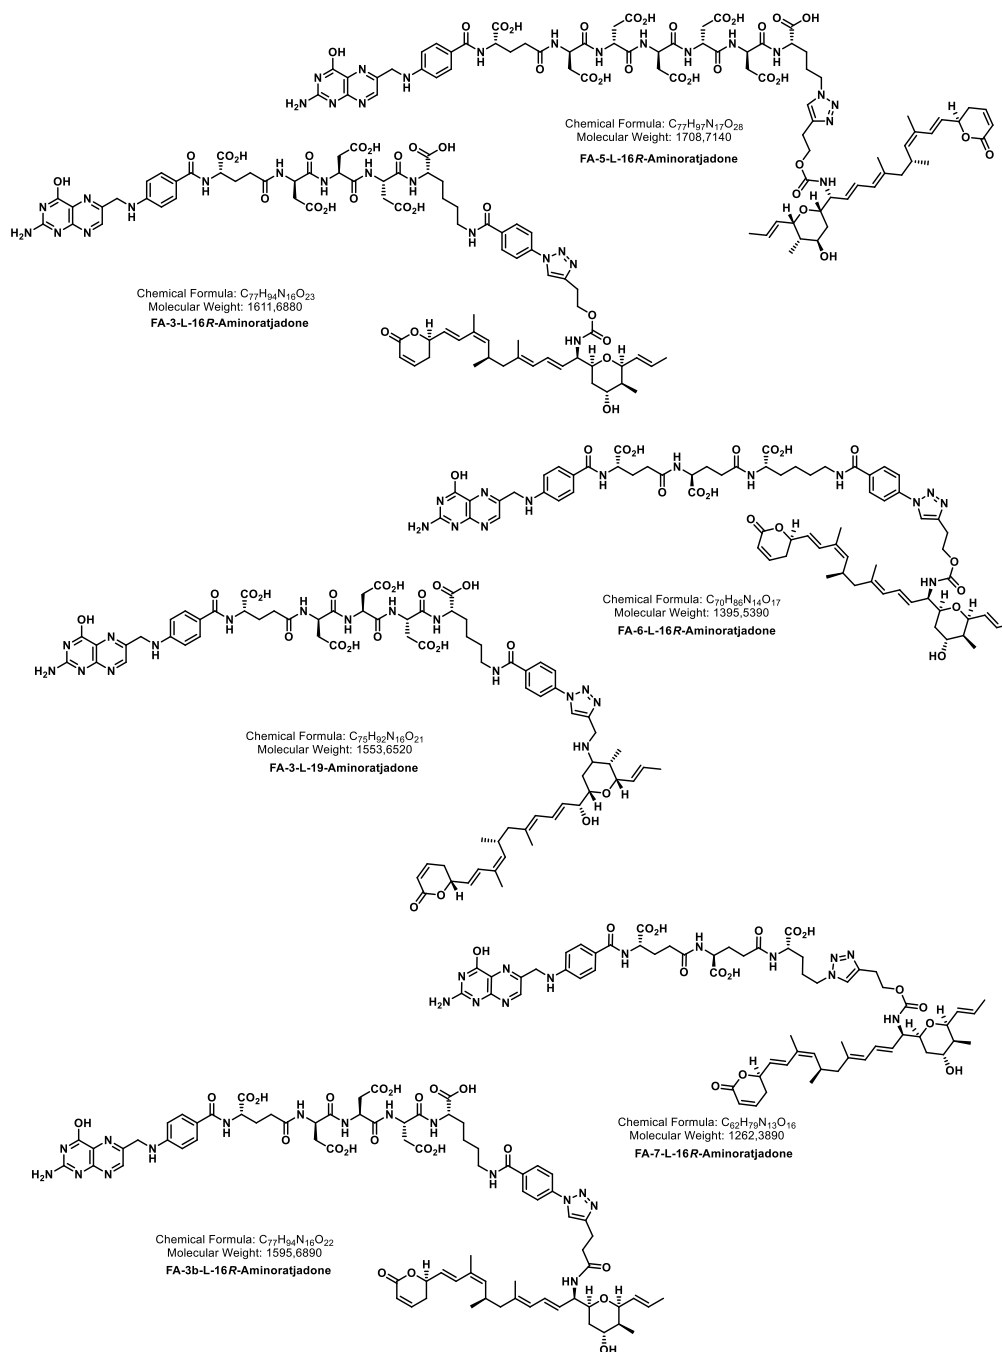

Figure S6: Continuation 3: Folate-Aminoratjadone conjugates synthesized in this study.

General procedure E for the synthesis of Folate-Aminoratjadone Conjugates via copper-free click reaction.

The corresponding **FA-N<sub>3</sub>** (1.1 equiv) was dissolved in DMSO (0.2 M), a solution of BCN-O(CO)HN-Val-Cit-*p*ABO(CO)-16*R*-Aminoratjadone**25** (1.0 equiv) in DMSO (0.2 M) was added and the mixture was stirred for 4-20 h at 23°C under light exclusion until complete conversion was monitored by LCMS. The reaction mixture was diluted with 100 µL of MeOH, filtered through a Whatman filter (45 µm) and directly purified by RP prep HPLC (Phenomenex Gemini C18 RP-column 00G-4435-PO-AX, 5 µm, 110 Å, 250×21.20 mm, Flow: 9 mL/min, ACN:H<sub>2</sub>O + 0.1% TFA/ 10:90 → 95:5 in 45 min) yielding the Folate-Ratjadone Conjugates after lyophilization as a yellow, amorph solids.

### FA-1-Val-Cit-*p*ABA-16*R*-Aminoratjadone

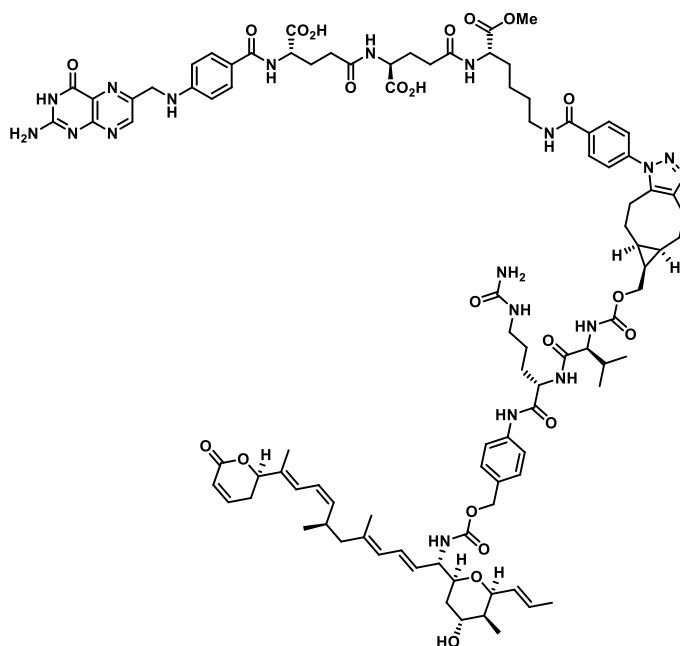

Chemical Formula: C<sub>96</sub>H<sub>123</sub>N<sub>19</sub>O<sub>22</sub>  
Molecular Weight: 1895,15

**FA-1-Val-Cit-*p*ABA-16*R*-Aminoratjadone**

Applying **FA-N<sub>3</sub>-1** to the general procedure E, 3.4 mg (17.49 µmol, 39%) **FA-1-Val-Cit-*p*ABA-16*R*-Aminoratjadone** was obtained as a mixture of diastereomers as a yellow, amorph solid.

**FA-1-Val-Cit-*p*ABA-16*R*-Aminoratjadone:** <sup>1</sup>H-NMR (700 MHz, DMSO-*d*<sub>6</sub>) δ [ppm]: 12.67 – 12.39 (m, 2H), 12.08 (s, 1H), 11.40 (s, 1H), 10.02 (d, *J* = 11.7 Hz, 1H), 8.68 – 8.61 (m, 2H), 8.27 – 8.19 (m, 1H), 8.16 – 8.09 (m, 1H), 8.04 (s, 1H), 8.03 (d, *J* = 8.4 Hz, 2H), 7.66 (t, *J* = 9.3 Hz, 2H), 7.59 (d, *J* = 8.2 Hz, 2H), 7.58 – 7.54 (m, 2H), 7.32 – 7.23 (m, 3H), 7.13 (s, 1H), 7.03 (ddd, *J* = 9.7, 5.5, 2.8 Hz, 1H), 6.92 (q, *J* = 5.9, 4.8 Hz, 1H), 6.75 (d, *J* = 15.6 Hz, 1H), 6.66 – 6.61 (m, 2H), 6.31 (dd, *J* = 14.9, 10.8 Hz, 1H), 6.01 – 5.92 (m, 2H), 5.80 – 5.71 (m, 2H), 5.56 (dd, *J* = 15.0, 7.0 Hz, 2H), 5.40 (s, 2H), 5.34 (dd, *J* = 15.5, 3.7 Hz, 1H), 5.23 (d, *J* = 9.6 Hz, 1H), 5.09

(t,  $J = 5.4$  Hz, 1H), 4.96 (d,  $J = 24.1$  Hz, 2H), 4.72 (s, 1H), 4.48 (s, 2H), 4.41 (d,  $J = 7.7$  Hz, 1H), 4.36 – 4.27 (m, 1H), 4.26 – 4.22 (m, 1H), 4.22 – 4.18 (m, 1H), 4.18 – 4.13 (m, 1H), 4.08 (d,  $J = 6.9$  Hz, 4H), 4.03 (d,  $J = 7.2$  Hz, 1H), 3.89 (d,  $J = 8.4$  Hz, 1H), 3.71 (s, 1H), 3.65 (dd,  $J = 11.8, 6.5$  Hz, 1H), 3.60 (t,  $J = 1.7$  Hz, 3H), 3.29 – 3.23 (m, 2H), 3.17 (s, 3H), 3.11 – 3.05 (m, 1H), 3.01 (d,  $J = 6.7$  Hz, 1H), 2.93 (dq,  $J = 13.3, 7.2, 6.4$  Hz, 3H), 2.89 – 2.80 (m, 2H), 2.64 (t,  $J = 12.4$  Hz, 1H), 2.53 – 2.51 (m, 1H), 2.47 – 2.41 (m, 1H), 2.32 – 2.22 (m, 2H), 2.21 – 2.13 (m, 3H), 2.11 – 2.03 (m, 2H), 1.98 (d,  $J = 7.0$  Hz, 3H), 1.97 – 1.85 (m, 4H), 1.75 – 1.73 (m, 3H), 1.67 (s, 3H), 1.63 (s, 3H), 1.62 (s, 3H), 1.54 – 1.41 (m, 8H), 1.39 – 1.29 (m, 6H), 0.98 (s, 3H), 0.89 – 0.84 (m, 6H), 0.83 (dd,  $J = 6.5, 3.1$  Hz, 6H), 0.73 (d,  $J = 7.1$  Hz, 3H).  $^{13}\text{C-NMR}$  (176 MHz, DMSO- $d_6$ )  $\delta$  [ppm]: 174.46, 174.15, 174.13, 173.79, 173.74, 173.43, 173.39, 173.22, 173.12, 172.76, 172.75, 171.84, 171.81, 171.79, 171.66, 171.57, 171.53, 171.51, 171.27, 170.52, 166.42, 166.31, 165.11, 163.52, 160.79, 158.84, 157.69, 157.52, 156.56, 156.37, 155.69, 153.68, 150.75, 148.68, 148.45, 146.70, 144.19, 138.49, 138.21, 136.17, 135.33, 134.28, 132.03, 131.16, 129.62, 129.34, 129.05, 129.02, 128.99, 128.42, 128.31, 127.92, 127.20, 126.79, 125.79, 125.47, 124.53, 121.37, 121.34, 121.30, 121.28, 120.33, 118.85, 118.24, 116.53, 111.14, 77.82, 74.03, 73.55, 69.78, 68.19, 64.91, 61.70, 60.05, 60.01, 56.52, 53.00, 52.66, 52.53, 52.22, 51.94, 51.89, 51.87, 51.72, 51.47, 51.33, 51.30, 48.59, 47.21, 45.90, 41.37, 40.43, 38.65, 33.64, 31.87, 31.67, 31.35, 31.31, 31.28, 30.56, 30.46, 30.42, 30.37, 30.32, 29.58, 29.51, 29.48, 29.21, 29.00, 28.97, 28.88, 28.72, 28.68, 28.58, 28.56, 28.53, 26.74, 25.22, 24.48, 23.06, 22.86, 22.08, 21.99, 21.40, 20.79, 20.09, 19.33, 19.20, 18.84, 18.78, 18.17, 18.15, 17.64, 17.50, 16.42, 13.95, 11.07, 11.04. **LRMS** (ESI-Quad) [m/z]: 1896.0 [M+H]<sup>+</sup>, **HRMS** (ESI-IT) [m/z]: 948.46350, calculated 948.46328 for C<sub>96</sub>H<sub>125</sub>N<sub>19</sub>O<sub>22</sub> [M+2H]<sup>2+</sup>, err [ppm] 0.231.

**FA-2-Val-Cit-pABA-16R-Aminoratjadone**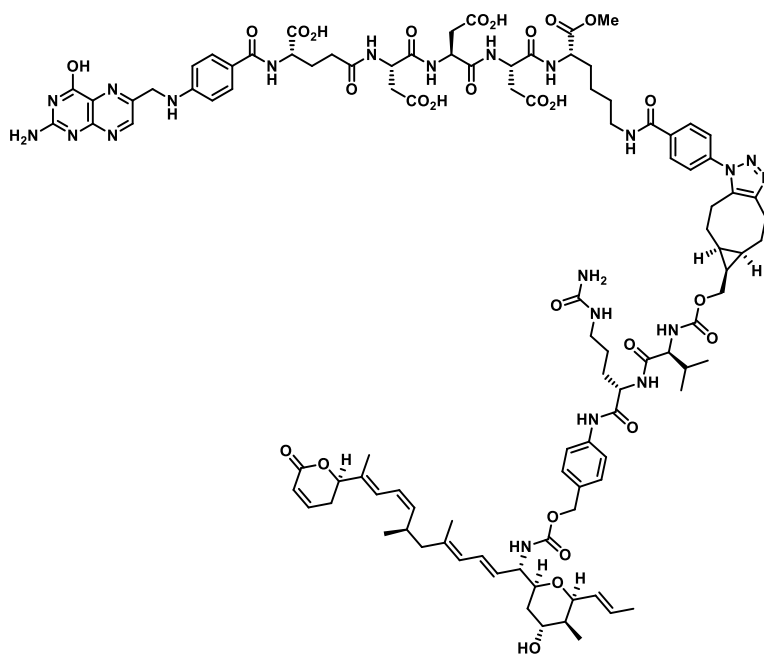

Chemical Formula: C<sub>103</sub>H<sub>131</sub>N<sub>21</sub>O<sub>28</sub>  
 Molecular Weight: 2111,30

**FA-2-Val-Cit-pABA-16R-Aminoratjadone**

Applying **FA-N<sub>3</sub>-2** to the general procedure E, 1.7 mg (0.805  $\mu$ mol, 28%) **FA-2-Val-Cit-pABA-16R-Aminoratjadone** was obtained as a mixture of diastereomers as a yellow, amorph solid.

**FA-2-Val-Cit-pABA-16R-Aminoratjadone: LRMS** (ESI-Quad) [m/z]: 2112.9 [M+H]<sup>+</sup>, **HRMS** (ESI-IT) [m/z]: 1056.4847, calculated 1056.4825 for C<sub>103</sub>H<sub>133</sub>N<sub>21</sub>O<sub>28</sub> [M+2H]<sup>2+</sup>, err [ppm] 2.082.

**FA-3-Val-Cit-pABA-16R-Aminoratjadone**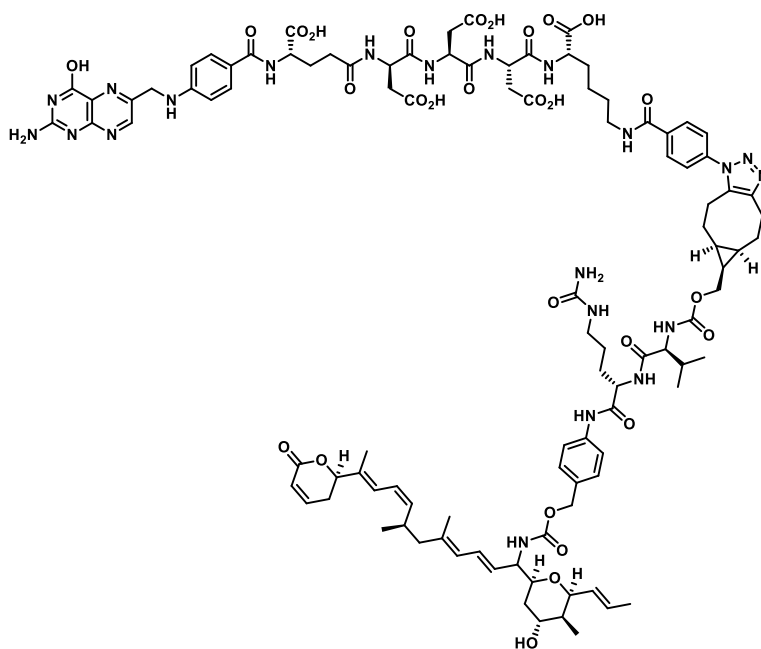

Chemical Formula: C<sub>102</sub>H<sub>129</sub>N<sub>21</sub>O<sub>28</sub>  
Molecular Weight: 2097.2730

**FA-3-Val-Cit-pABA-16R-Aminoratjadone**

Applying **FA-N<sub>3</sub>-3** to the general procedure E, 3.3 mg (1.573 μmol, 54%) **FA-3-Val-Cit-pABA-16R-Aminoratjadone** was obtained as a mixture of diastereomers as a yellow, amorph solid.

**FA-3-Val-Cit-pABA-16R-Aminoratjadone:** <sup>1</sup>H-NMR (700 MHz, DMSO-*d*<sub>6</sub>) δ [ppm]: 12.35 (s, 5H), 10.02 (d, *J* = 11.6 Hz, 1H), 8.67 (s, 1H), 8.63 (s, 1H), 8.48 – 8.10 (m, 3H), 8.03 (d, *J* = 8.2 Hz, 2H), 8.09 – 7.98 (m, 2H), 7.71 – 7.68 (m, 1H), 7.68 – 7.64 (m, 2H), 7.59 (d, *J* = 8.4 Hz, 3H), 7.56 (d, *J* = 8.9 Hz, 2H), 7.30 (d, *J* = 9.3 Hz, 1H), 7.27 (t, *J* = 8.2 Hz, 2H), 7.13 (t, *J* = 9.9 Hz, 1H), 7.03 (ddd, *J* = 9.6, 5.5, 2.8 Hz, 1H), 6.75 (d, *J* = 15.6 Hz, 1H), 6.64 (dd, *J* = 8.8, 3.3 Hz, 2H), 6.31 (dd, *J* = 15.0, 11.0 Hz, 1H), 6.02 – 5.92 (m, 2H), 5.75 (s, 2H), 5.79 – 5.71 (m, 2H), 5.57 (dt, *J* = 14.9, 7.3 Hz, 2H), 5.35 (dd, *J* = 15.4, 3.6 Hz, 1H), 5.23 (d, *J* = 9.5 Hz, 1H), 5.09 (dt, *J* = 10.4, 5.0 Hz, 1H), 4.98 (d, *J* = 11.9 Hz, 1H), 4.93 (d, *J* = 9.5 Hz, 1H), 4.60 – 4.52 (m, 2H), 4.50 (s, 2H), 4.48 – 4.43 (m, 1H), 4.41 (dt, *J* = 14.9, 8.4 Hz, 1H), 4.32 (dd, *J* = 13.3, 8.7 Hz, 1H), 4.24 (s, 1H), 4.23 – 4.19 (m, 1H), 4.17 – 4.11 (m, 2H), 4.10 – 4.07 (m, 2H), 4.03 (dd, *J* = 14.2, 6.8 Hz, 1H), 3.89 (dd, *J* = 15.3, 7.9 Hz, 1H), 3.71 (s, 2H), 3.68 – 3.61 (m, 1H), 3.36 – 3.22 (m, 2H), 3.13 – 3.04 (m, 1H), 3.04 – 2.98 (m, 1H), 2.96 – 2.88 (m, 2), 2.85 (dt, *J* = 13.9, 6.9 Hz, 2H), 2.79 – 2.67 (m, 2H), 2.64 (dq, *J* = 13.1, 8.2, 7.0 Hz, 1H), 2.46 – 2.38 (m, 2H), 2.32 – 2.20 (m, 2H), 2.18 – 2.12 (m, 1H), 2.07 (t, *J* = 7.6 Hz, 2H), 1.98 (d, *J* = 7.1 Hz, 2H), 1.97 – 1.92 (m, 2H), 1.91 – 1.84 (m, 1H), 1.74 (s, 3H), 1.67 (s, 3H), 1.63 (d, *J* = 6.4 Hz, 6H), 1.60 – 1.56 (m, 2H), 1.55 – 1.51 (m, 2H), 1.51 – 1.47 (m, 2H), 1.45 (d, *J* = 12.8 Hz, 2H), 1.40 – 1.30 (m, 5H), 1.14 (dt, *J* = 14.3, 7.5 Hz, 2H), 0.98 (s, 3H), 0.87 (d, *J* = 6.6 Hz, 6H), 0.83 (dd, *J* = 6.5, 2.9 Hz, 6H), 0.73 (d, *J* = 7.1 Hz, 3H). <sup>13</sup>C-NMR (176



MHz, DMSO- $d_6$ )  $\delta$  [ppm]: 206.11, 174.16, 174.12, 173.71, 173.69, 173.29, 173.25, 172.42, 172.15, 172.09, 172.05, 171.98, 171.88, 171.87, 171.85, 171.79, 171.75, 171.74, 171.69, 171.27, 171.26, 171.10, 171.00, 170.78, 170.52, 170.34, 170.32, 170.19, 166.32, 165.13, 163.53, 160.49, 158.87, 158.45, 158.24, 158.04, 157.84, 156.37, 155.70, 153.31, 150.86, 150.70, 149.41, 148.35, 146.71, 144.19, 138.50, 138.46, 138.20, 136.17, 135.35, 134.28, 132.04, 131.16, 129.34, 129.03, 128.45, 128.32, 127.95, 127.21, 126.80, 125.79, 125.46, 124.54, 121.34, 121.31, 120.33, 118.86, 118.82, 116.74, 115.07, 111.18, 77.82, 74.03, 73.55, 68.19, 64.91, 61.68, 60.05, 59.98, 56.52, 54.91, 53.00, 51.96, 49.77, 49.46, 47.22, 45.84, 40.02, 39.88, 39.76, 39.64, 39.52, 39.40, 39.28, 39.16, 38.65, 36.05, 35.99, 35.85, 35.79, 31.93, 31.15, 30.65, 30.39, 30.33, 30.27, 29.82, 29.58, 29.52, 29.48, 29.21, 29.01, 28.63, 26.74, 26.54, 26.34, 25.21, 23.08, 22.75, 21.99, 21.41, 20.80, 20.10, 19.34, 19.20, 18.84, 18.77, 18.16, 17.65, 17.51, 16.43, 15.72, 13.95, 11.08. **LRMS** (ESI-Quad) [m/z]: 1049.8 [M+2H]<sup>2+</sup>, **HRMS** (ESI-IT) [m/z]: 1049.47480, calculated 1049.47475 for C<sub>102</sub>H<sub>131</sub>N<sub>21</sub>O<sub>28</sub> [M+2H]<sup>2+</sup>, err [ppm] 0.047.

**FA-4-(Val-Cit-pABA-16R-Aminoratjadone)<sub>2</sub>**

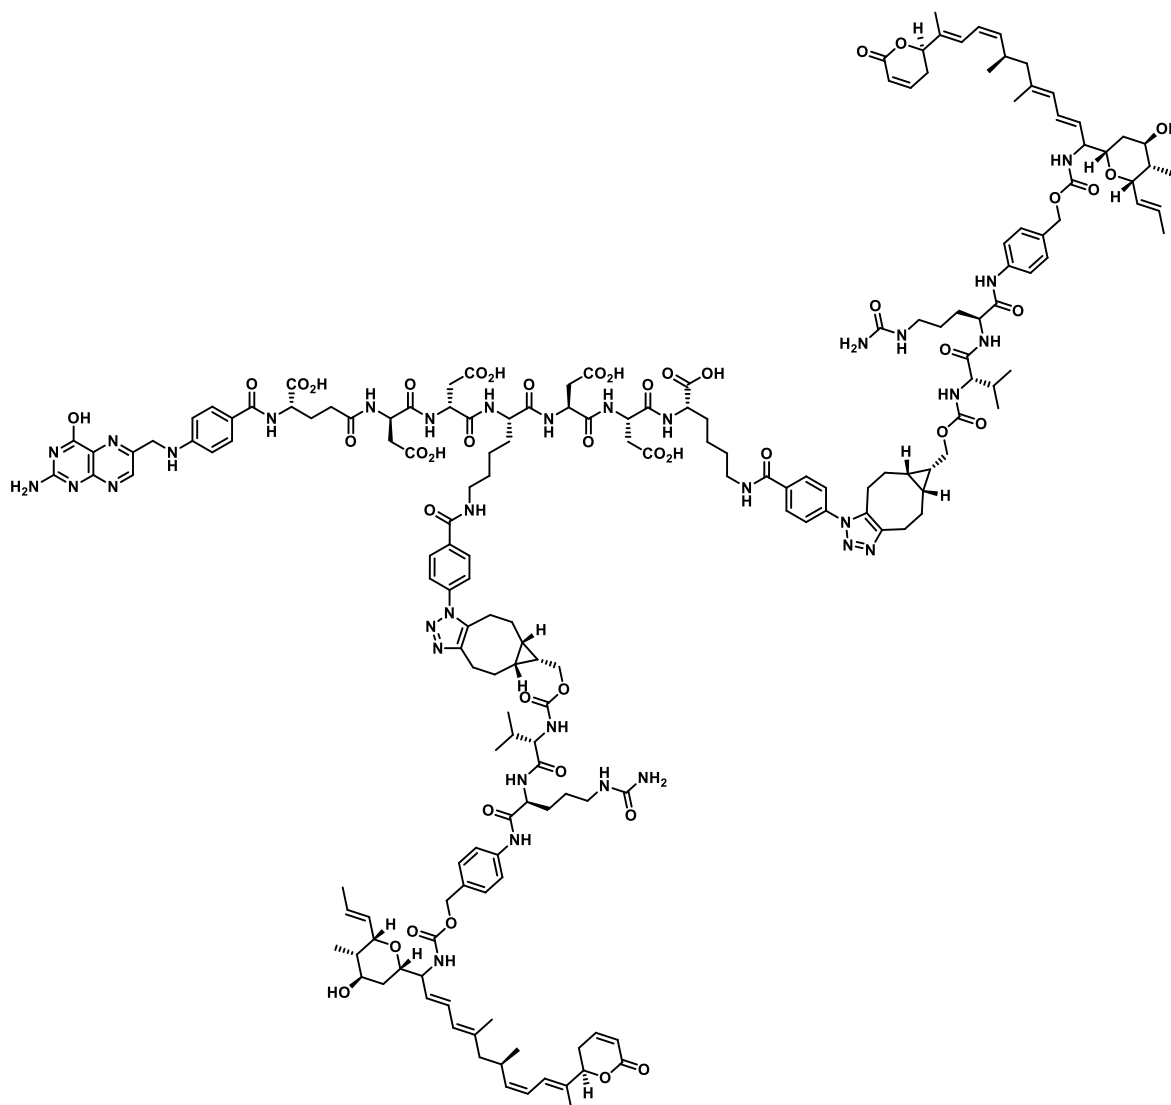

Chemical Formula: C<sub>177</sub>H<sub>229</sub>N<sub>33</sub>O<sub>44</sub>  
Molecular Weight: 3522.97

**FA-4-(Val-Cit-pABA-16R-Aminoratjadone)<sub>2</sub>**

Applying **FA-N<sub>3</sub>-4** to the general procedure E (modification: 2.2 equiv of BCN-O(CO)HN-Val-Cit-pABO(CO)-16R-Aminoratjadone**25**), 2.9 mg (0.80 μmol, 36%) **FA-4-(Val-Cit-pABA-16R-Aminoratjadone)<sub>2</sub>** was obtained as a mixture of diastereomers as a yellow, amorph solid.

**FA-4-(Val-Cit-pABA-16R-Aminoratjadone)<sub>2</sub>**: <sup>1</sup>H-NMR (500 MHz, DMSO-*d*<sub>6</sub>) δ [ppm]: 12.37 (s, 6H), 10.03 (s, 1H), 10.01 (s, 1H), 8.66 (s, 1H), 8.64 – 8.62 (m, 1H), 8.62 – 8.59 (m, 1H), 8.43 – 7.92 (m, 4H), 8.02 (d, *J* = 8.1 Hz, 4H), 7.90 – 7.67 (m, 1H), 7.66 (d, *J* = 8.4 Hz, 2H), 7.60 – 7.54 (m, 6H), 7.43 – 7.22 (m, 5H), 7.19 – 7.08 (m, 2H), 7.03 (dq, *J* = 8.8, 2.8 Hz, 2H), 6.75 (d, *J* = 15.6 Hz, 2H), 6.64 (d, *J* = 8.3 Hz, 2H), 6.31 (dd, *J* = 14.9, 11.2 Hz, 2H), 5.97 (d, *J* = 9.8 Hz, 4H), 5.79 – 5.71 (m, 8H), 5.57 (dt, *J* = 14.7, 7.2 Hz, 4H), 5.38 – 5.29 (m, 2H),

5.23 (d,  $J = 9.5$  Hz, 2H), 5.09 (dt,  $J = 10.4, 5.3$  Hz, 2H), 4.98 (d,  $J = 11.9$  Hz, 2H), 4.93 (d,  $J = 9.2$  Hz, 2H), 4.58 (d,  $J = 6.1$  Hz, 1H), 4.53 (s, 2H), 4.50 (s, 2H), 4.41 (dt,  $J = 14.7, 7.6$  Hz, 2H), 4.32 (s, 1H), 4.24 (s, 2H), 4.17 (s, 1H), 4.14 (s, 2H), 4.08 (s, 3H), 4.06 – 4.01 (m, 3H), 3.92 – 3.86 (m, 6H), 3.85 – 3.73 (m, 8H), 3.71 (s, 4H), 3.66 (dd,  $J = 10.9, 5.0$  Hz, 4H), 3.27 (s, 4H), 3.07 (s, 1H), 3.01 (s, 2H), 2.90 (d,  $J = 21.3$  Hz, 3H), 2.88 – 2.81 (m, 3H), 2.79 – 2.57 (m, 5H), 2.46 – 2.37 (m, 4H), 2.33 – 2.20 (m, 2H), 2.14 (s, 2H), 2.07 (s, 2H), 1.98 (d,  $J = 7.0$  Hz, 2H), 1.98 – 1.85 (m, 4H), 1.74 (s, 6H), 1.67 (s, 6H), 1.63 (d,  $J = 6.2$  Hz, 6H), 1.60 – 1.31 (m, 22H), 1.18 – 1.10 (m, 4H), 0.97 (s, 4H), 0.86 (t,  $J = 7.0$  Hz, 12), 0.84 – 0.81 (m, 6H), 0.73 (d,  $J = 7.0$  Hz, 6H).  **$^{13}\text{C-NMR}$**  (176 MHz, DMSO- $d_6$ )  $\delta$  [ppm]: 174.47, 174.23, 174.11, 173.74, 173.33, 173.28, 172.39, 172.06, 172.04, 172.02, 171.94, 171.86, 171.79, 171.73, 171.72, 171.66, 171.62, 171.59, 171.27, 170.67, 170.63, 170.58, 170.52, 170.45, 170.41, 170.36, 170.34, 166.34, 165.12, 163.53, 160.58, 158.86, 158.34, 158.14, 157.94, 157.74, 156.37, 155.69, 153.39, 150.82, 150.71, 149.27, 149.22, 148.39, 146.70, 144.18, 138.49, 138.19, 136.17, 135.34, 134.26, 132.04, 131.98, 131.29, 131.16, 129.46, 129.34, 129.20, 129.02, 128.44, 128.31, 128.23, 127.94, 127.20, 126.79, 125.84, 125.79, 125.54, 125.43, 124.53, 124.39, 121.33, 121.30, 120.33, 118.86, 111.17, 77.82, 74.03, 73.63, 73.55, 68.27, 68.18, 64.91, 63.07, 61.67, 60.04, 59.97, 56.52, 54.91, 53.00, 52.90, 52.88, 52.06, 52.03, 51.99, 49.95, 49.94, 49.92, 49.63, 49.62, 49.59, 49.56, 49.51, 49.46, 49.34, 47.33, 47.21, 45.85, 40.43, 38.65, 35.98, 35.86, 34.48, 33.65, 31.89, 31.86, 31.28, 31.19, 31.15, 30.65, 30.39, 30.36, 30.33, 30.27, 30.15, 29.88, 29.82, 29.58, 29.52, 29.47, 29.42, 29.31, 29.26, 29.21, 29.00, 28.97, 28.89, 28.72, 28.69, 28.63, 28.53, 28.50, 26.82, 26.73, 26.53, 25.20, 24.48, 23.07, 22.80, 22.08, 21.98, 21.40, 20.79, 20.09, 20.03, 19.36, 19.32, 19.20, 18.81, 18.78, 18.76, 18.18, 18.15, 17.65, 17.50, 16.42, 15.72, 13.95, 11.12, 11.08. **LRMS** (ESI-Quad) [m/z]: 1175.4 [M+3H] $^{3+}$ , **HRMS** (ESI-IT) [m/z]: 1174.89793, calculated 1174.89827 for C $_{177}$ H $_{232}$ N $_{33}$ O $_{44}$  [M+3H] $^{3+}$ , err [ppm] -0.289.

#### FA-5-Val-Cit-pABA-16R-Aminoratjadone

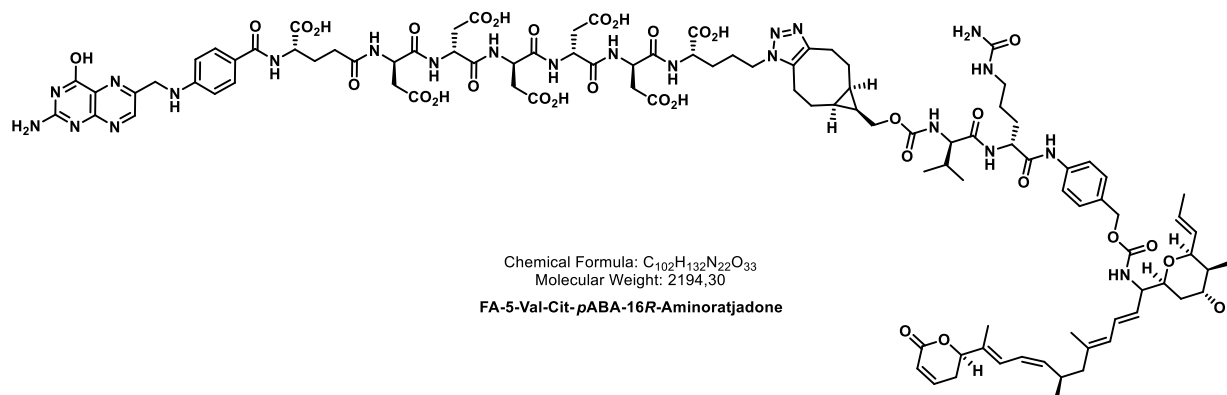

Applying **FA-N $_3$ -5** to the general procedure E, 3.9 mg (1.78  $\mu\text{mol}$ , 61%) **FA-5-Val-Cit-pABA-16R-Aminoratjadone** was obtained as a mixture of diastereomers as a yellow, amorph solid.

**FA-5-Val-Cit-pABA-16R-Aminoratjadone:**  $^1\text{H-NMR}$  (700 MHz,  $\text{DMSO-}d_6$ )  $\delta$  [ppm]: 12.36 (s, 7H), 10.10 – 9.88 (m, 1H), 8.69 (s, 1H), 8.24 – 8.11 (m, 2H), 8.11 – 7.95 (m, 4H), 7.90 – 7.75 (m, 1H), 7.66 (d,  $J = 8.5$  Hz, 2H), 7.60 – 7.51 (m, 2H), 7.48 – 7.34 (m, 1H), 7.30 (d,  $J = 9.2$  Hz, 1H), 7.27 (d,  $J = 8.3$  Hz, 2H), 7.17 – 7.08 (m, 1H), 7.04 (ddd,  $J = 9.6, 5.5, 2.8$  Hz, 1H), 6.75 (d,  $J = 15.6$  Hz, 1H), 6.64 (d,  $J = 8.6$  Hz, 2H), 6.31 (dd,  $J = 14.4, 11.0$  Hz, 1H), 6.01 (s, 1H), 5.98 – 5.95 (m, 1H), 5.77 (d,  $J = 11.2$  Hz, 1H), 5.75 – 5.72 (m, 1H), 5.57 (dt,  $J = 14.8, 7.4$  Hz, 2H), 5.38 – 5.32 (m, 1H), 5.23 (d,  $J = 9.5$  Hz, 1H), 5.09 (dt,  $J = 10.4, 5.0$  Hz, 1H), 4.99 (d,  $J = 12.4$  Hz, 1H), 4.93 (d,  $J = 12.2$  Hz, 1H), 4.59 – 4.52 (m, 2H), 4.54 – 4.47 (m, 4H), 4.41 (s, 2H), 4.30 (dd,  $J = 13.5, 8.3$  Hz, 1H), 4.26 – 4.22 (m, 2H), 4.21 (s, 5H), 4.08 (d,  $J = 7.0$  Hz, 1H), 4.04 (d,  $J = 6.3$  Hz, 2H), 3.90 (dd,  $J = 14.9, 6.8$  Hz, 1H), 3.71 (s, 2H), 3.66 (ddd,  $J = 11.9, 5.7, 2.2$  Hz, 1H), 3.06 – 2.98 (m, 1H), 2.98 – 2.89 (m, 4H), 2.85 (dq,  $J = 14.0, 7.0$  Hz, 1H), 2.79 – 2.63 (m, 8H), 2.45 (ddt,  $J = 18.6, 10.6, 2.7$  Hz, 2H), 2.31 – 2.16 (m, 2H), 2.11 (s, 1H), 2.06 (d,  $J = 9.9$  Hz, 2H), 1.99 (d,  $J = 7.1$  Hz, 2H), 1.95 (dd,  $J = 13.6, 6.9$  Hz, 2H), 1.91 – 1.86 (m, 1H), 1.74 (s, 3H), 1.67 (s, 3H), 1.63 (d,  $J = 6.5$  Hz, 3H), 1.61 – 1.53 (m, 4H), 1.52 – 1.40 (m, 4H), 1.40 – 1.34 (m, 1H), 1.32 (d,  $J = 15.2$  Hz, 1H), 1.15 – 1.09 (m, 1H), 0.97 – 0.88 (m, 3H), 0.89 – 0.85 (m, 6H), 0.83 (d,  $J = 6.7$  Hz, 3H), 0.73 (d,  $J = 7.1$  Hz, 3H).  $^{13}\text{C-NMR}$  (176 MHz,  $\text{DMSO-}d_6$ )  $\delta$  [ppm]: 174.23, 174.10, 173.75, 173.73, 172.92, 172.13, 171.87, 171.83, 171.77, 171.59, 171.30, 170.95, 170.90, 170.79, 170.74, 170.70, 170.59, 170.54, 170.28, 170.26, 166.31, 163.54, 160.26, 158.93, 158.58, 158.37, 158.17, 157.96, 156.39, 155.71, 153.13, 150.81, 150.68, 149.88, 148.25, 146.72, 143.26, 138.50, 136.19, 132.95, 132.89, 132.05, 131.17, 129.35, 129.17, 129.03, 128.33, 127.97, 127.22, 126.80, 125.80, 124.55, 121.36, 120.34, 118.87, 116.56, 114.90, 111.21, 77.83, 74.04, 73.56, 68.20, 64.92, 61.71, 60.00, 59.95, 56.53, 55.06, 53.39, 53.04, 52.12, 51.36, 51.33, 49.72, 49.59, 49.40, 48.60, 47.22, 46.68, 45.83, 40.43, 40.02, 38.66, 36.08, 35.86, 35.83, 31.95, 31.29, 31.16, 30.41, 30.37, 30.26, 29.83, 29.59, 29.49, 29.22, 29.01, 28.70, 27.95, 26.73, 26.58, 25.88, 25.34, 25.25, 22.12, 21.78, 21.70, 21.04, 20.80, 20.10, 20.05, 19.21, 18.58, 18.42, 18.17, 17.66, 17.27, 16.44, 13.96, 11.09. **LRMS** (ESI-Quad) [m/z]: 1097.7  $[\text{M}+2\text{H}]^{2+}$ , **HRMS** (ESI-IT) [m/z]: 1097.97430, calculated 1097.9753 for  $\text{C}_{102}\text{H}_{134}\text{N}_{22}\text{O}_{33}$   $[\text{M}+2\text{H}]^{2+}$ , err [ppm] -0.919.

**FA-6-Val-Cit-pABA-16R-Aminoratjadone**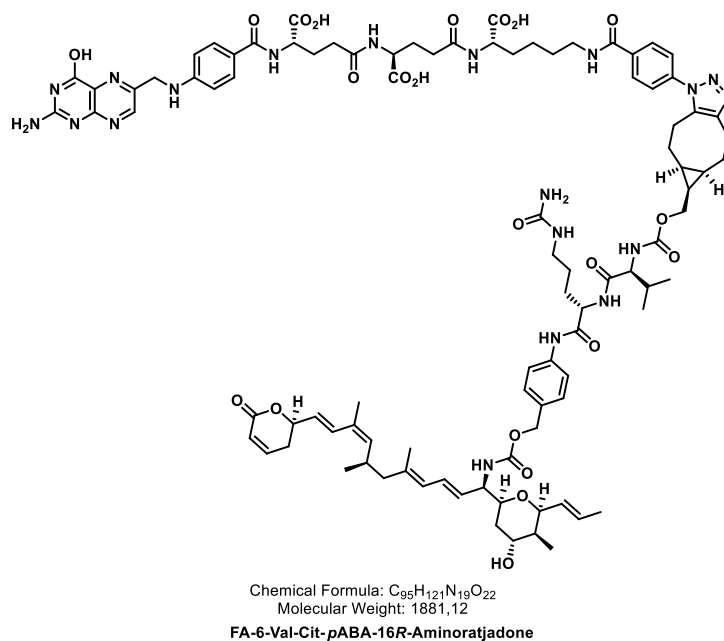

Applying **FA-N<sub>3</sub>-6** to the general procedure E, 2.2 mg (1.17 μmol, 49%) **FA-6-Val-Cit-pABA-16R-Aminoratjadone** was obtained as a mixture of diastereomers as a yellow, amorph solid.

**FA-6-Val-Cit-pABA-16R-Aminoratjadone:** <sup>1</sup>H-NMR (700 MHz, DMSO-*d*<sub>6</sub>) δ [ppm]: 12.57 (s, 3H), 10.11 – 9.94 (m, 1H), 8.66 (s, 1H), 8.22 (dd, *J* = 17.1, 7.7 Hz, 1H), 8.17 – 8.09 (m, 2H), 8.06 (s, 1H), 7.95 (d, *J* = 7.6 Hz, 1H), 7.67 (t, *J* = 7.5 Hz, 2H), 7.62 – 7.51 (m, 2H), 7.30 (d, *J* = 9.2 Hz, 1H), 7.27 (d, *J* = 6.8 Hz, 2H), 7.14 – 7.11 (m, 1H), 7.04 (dq, *J* = 9.4, 2.8 Hz, 2H), 6.75 (d, *J* = 15.5 Hz, 1H), 6.64 (d, *J* = 8.4 Hz, 2H), 6.31 (dd, *J* = 14.7, 11.0 Hz, 1H), 5.97 (d, *J* = 9.8 Hz, 2H), 5.77 (d, *J* = 11.3 Hz, 1H), 5.76 – 5.69 (m, 1H), 5.57 (dt, *J* = 14.8, 7.1 Hz, 2H), 5.42 (s, 1H), 5.35 (dd, *J* = 14.9, 4.2 Hz, 1H), 5.23 (d, *J* = 9.6 Hz, 1H), 5.09 (dt, *J* = 10.6, 5.4 Hz, 1H), 4.99 (d, *J* = 12.5 Hz, 1H), 4.93 (d, *J* = 12.1 Hz, 1H), 4.50 (s, 2H), 4.41 (s, 2H), 4.35 – 4.27 (m, 1H), 4.24 (s, 2H), 4.23 – 4.12 (m, 6H), 4.10 – 4.01 (m, 4H), 3.90 (dd, *J* = 14.4, 6.3 Hz, 2H), 3.71 (s, 2H), 3.01 (s, 1H), 2.94 (s, 3H), 2.85 (dt, *J* = 16.2, 7.1 Hz, 1H), 2.80 – 2.63 (m, 4H), 2.47 – 2.38 (m, 2H), 2.33 – 2.20 (m, 2H), 2.20 – 2.13 (m, 2H), 2.08 (d, *J* = 8.6 Hz, 2H), 1.99 (d, *J* = 7.1 Hz, 2H), 1.97 – 1.85 (m, 4H), 1.74 (s, 3H), 1.67 (s, 3H), 1.63 (d, *J* = 6.3 Hz, 3H), 1.60 – 1.52 (m, 6H), 1.51 – 1.47 (m, 3H), 1.45 (d, *J* = 12.2 Hz, 2H), 1.40 – 1.30 (m, 4H), 1.15 – 1.08 (m, 2H), 0.96 – 0.86 (m, 3H), 0.88 – 0.85 (m, 6H), 0.83 (d, *J* = 6.7 Hz, 3H), 0.73 (d, *J* = 7.1 Hz, 3H). <sup>13</sup>C-NMR (176 MHz, DMSO-*d*<sub>6</sub>) δ [ppm]: 174.17, 174.14, 173.82, 173.79, 173.76, 173.44, 173.43, 173.41, 173.13, 171.80, 171.41, 171.29, 170.53, 166.40, 166.30, 163.53, 160.67, 158.88, 158.09, 157.90, 156.38, 155.70, 153.48, 150.73, 149.07, 148.44, 148.37, 147.14, 146.71, 143.34, 138.49, 136.17, 132.83, 132.77, 132.03, 131.16, 129.34, 129.06, 129.02, 128.32, 127.95, 127.21, 126.80, 125.79, 124.54,

121.37, 121.35, 121.34, 121.31, 120.33, 118.86, 111.17, 77.82, 74.03, 73.55, 68.19, 64.91, 61.70, 59.99, 59.97, 56.52, 55.92, 53.03, 52.24, 51.99, 51.43, 51.28, 51.25, 47.22, 46.66, 45.87, 38.65, 33.65, 31.86, 31.68, 31.44, 31.38, 31.28, 30.46, 30.36, 29.58, 29.48, 29.31, 29.21, 29.01, 28.89, 28.72, 28.69, 28.53, 28.01, 27.17, 26.95, 26.74, 26.66, 26.50, 26.03, 25.36, 25.28, 24.48, 22.08, 21.81, 21.75, 21.16, 21.09, 20.79, 20.10, 19.20, 19.14, 18.63, 18.49, 18.17, 17.65, 17.27, 16.43, 13.95, 11.08. **LRMS** (ESI-Quad) [m/z]: 1882.6 [M+H]<sup>+</sup>, **HRMS** (ESI-IT) [m/z]: 940.9543, calculated 940.9540 for C<sub>95</sub>H<sub>123</sub>N<sub>19</sub>O<sub>22</sub> [M+2H]<sup>2+</sup>, err [ppm] 0.318.

### FA-7-Val-Cit-pABA-16R-Aminoratjadone

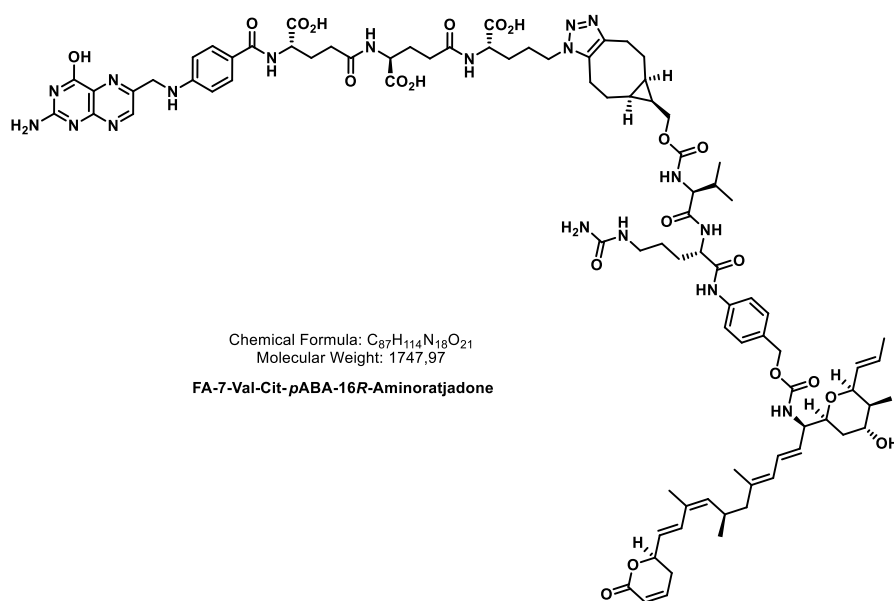

Applying **FA-N<sub>3</sub>-7** to the general procedure E, 1.1 mg (0.629 μmol, 26%) **FA-7-Val-Cit-pABA-16R-Aminoratjadone** was obtained as a mixture of diastereomers as a yellow, amorphous solid.

**FA-7-Val-Cit-pABA-16R-Aminoratjadone:** <sup>1</sup>H-NMR (700 MHz, DMSO-*d*<sub>6</sub>) δ [ppm]: 12.50 (s, 3H), 10.02 (d, *J* = 11.7 Hz, 1H), 8.66 (s, 1H), 8.66 – 8.62 (m, 1H), 8.24 – 7.93 (m, 5H), 8.03 (d, *J* = 8.3 Hz, 2H), 7.66 (d, *J* = 8.4 Hz, 1H), 7.70 – 7.60 (m, 2H), 7.59 (d, *J* = 8.2 Hz, 2H), 7.56 (d, *J* = 8.9 Hz, 2H), 7.30 (d, *J* = 9.3 Hz, 1H), 7.29 – 7.24 (m, 2H), 7.13 (t, *J* = 9.1 Hz, 1H), 7.03 (ddt, *J* = 8.5, 5.6, 2.8 Hz, 1H), 6.75 (d, *J* = 15.6 Hz, 1H), 6.66 – 6.61 (m, 2H), 6.31 (dd, *J* = 15.0, 11.1 Hz, 1H), 5.97 (d, *J* = 9.7 Hz, 2H), 5.77 (d, *J* = 11.0 Hz, 1H), 5.75 – 5.72 (m, 1H), 5.57 (dt, *J* = 14.8, 7.2 Hz, 2H), 5.40 (s, 1H), 5.34 (dd, *J* = 15.5, 3.5 Hz, 1H), 5.23 (d, *J* = 9.5 Hz, 1H), 5.09 (dt, *J* = 10.5, 5.2 Hz, 1H), 4.98 (d, *J* = 11.9 Hz, 1H), 4.93 (d, *J* = 9.6 Hz, 1H), 4.49 (s, 1H), 4.44 – 4.37 (m, 2H), 4.35 – 4.28 (m, 1H), 4.24 (s, 1H), 4.15 (dt, *J* = 14.9, 7.9 Hz, 2H), 4.08 (d, *J* = 7.2 Hz, 2H), 4.03 (d, *J* = 6.9 Hz, 1H), 3.89 (q, *J* = 7.6 Hz, 1H), 3.71 (s, 1H), 3.65 (ddd, *J* = 11.6, 5.4, 1.8 Hz, 2H), 3.27 (s, 2H), 3.11 – 3.05 (m, 1H), 3.04 – 2.98 (m, 1H), 2.92 (s, 2H), 2.88 – 2.81 (m, 2H), 2.67 – 2.60 (m, 1H), 2.48 – 2.41 (m, 2H), 2.32 –

2.22 (m, 2H), 2.23 – 2.13 (m, 3H), 2.07 (d,  $J = 3.0$  Hz, 1H), 1.98 (d,  $J = 7.2$  Hz, 2H), 1.92 (ddd,  $J = 43.1, 14.6, 6.9$  Hz, 3H), 1.74 (s, 3H), 1.67 (s, 3H), 1.63 (d,  $J = 6.4$  Hz, 3H), 1.60 – 1.40 (m, 10H), 1.39 – 1.30 (m, 5H), 1.18 – 1.09 (m, 1H), 0.98 (s, 2H), 0.87 (d,  $J = 6.5$  Hz, 6H), 0.83 (dd,  $J = 6.4, 3.0$  Hz, 3H), 0.73 (d,  $J = 7.0$  Hz, 3H).  **$^{13}\text{C-NMR}$**  (176 MHz, DMSO- $d_6$ )  $\delta$  [ppm]: 174.14, 173.78, 173.76, 173.45, 173.42, 173.25, 173.15, 171.85, 171.81, 171.80, 171.68, 171.46, 171.41, 171.38, 171.27, 170.52, 166.39, 166.31, 165.10, 163.53, 160.73, 160.68, 158.86, 158.23, 158.04, 157.85, 157.65, 156.38, 155.70, 155.08, 154.90, 153.48, 150.72, 149.14, 149.08, 148.44, 146.71, 144.19, 138.50, 138.46, 138.21, 136.18, 135.35, 134.29, 132.92, 132.04, 131.29, 131.16, 129.35, 129.06, 129.03, 129.00, 128.43, 128.32, 128.21, 127.95, 127.78, 127.65, 127.21, 126.80, 125.79, 125.47, 124.54, 121.39, 121.35, 120.33, 118.86, 111.17, 77.82, 74.03, 73.55, 68.27, 68.19, 64.91, 61.68, 60.05, 59.99, 56.52, 53.00, 52.62, 52.24, 51.98, 51.76, 51.51, 51.36, 47.33, 47.22, 45.87, 38.65, 33.65, 31.87, 31.70, 31.47, 31.43, 31.34, 31.28, 31.20, 30.72, 30.47, 30.43, 30.38, 30.33, 30.15, 29.58, 29.51, 29.48, 29.26, 29.21, 29.01, 28.97, 28.89, 28.73, 28.69, 28.66, 28.64, 28.53, 27.20, 27.06, 26.98, 26.85, 26.75, 26.68, 25.22, 24.49, 23.07, 22.98, 22.09, 22.00, 21.43, 21.41, 20.80, 20.10, 20.04, 19.35, 19.34, 19.20, 19.14, 18.84, 18.78, 18.18, 18.16, 17.65, 17.51, 16.43, 15.72, 13.96, 11.08. **LRMS** (ESI-Quad) [m/z]: 1748.6 [M+H]<sup>+</sup>, **HRMS** (ESI-IT) [m/z]: 874.4274, calculated 874.4276 for C<sub>87</sub>H<sub>116</sub>N<sub>18</sub>O<sub>21</sub> [M+2H]<sup>2+</sup>, err [ppm] -0.228.

**FA-8-Val-Cit-pABA-16R-Aminoratjadone**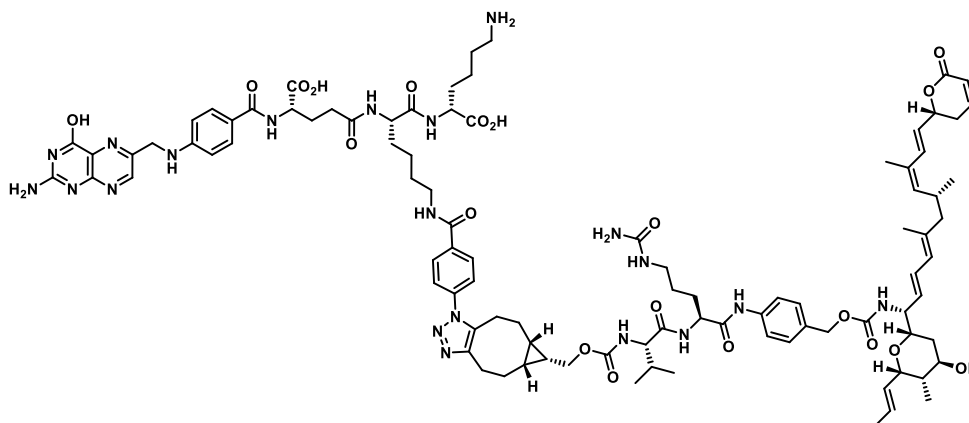

Chemical Formula: C<sub>96</sub>H<sub>126</sub>N<sub>20</sub>O<sub>20</sub>  
Molecular Weight: 1880,18

**FA-8-Val-Cit-pABA-16R-Aminoratjadone**

Applying **FA-N<sub>3</sub>-8** to the general procedure E, 1.3 mg (0.691 μmol, 32%) **FA-8-Val-Cit-pABA-16R-Aminoratjadone** was obtained as a mixture of diastereomers of TFA salts as a yellow, amorphous solid.

**FA-8-Val-Cit-pABA-16R-Aminoratjadone:** <sup>1</sup>H-NMR (700 MHz, DMSO-*d*<sub>6</sub>) δ [ppm]: 12.62 (s, 1H), 12.32 (d, *J* = 258.2 Hz, 1H), 11.48 (s, 1H), 10.02 (d, *J* = 13.1 Hz, 1H), 8.75 – 8.52 (m, 2H), 8.31 – 7.85 (m, 6H), 7.66 (d, *J* = 8.7 Hz, 2H), 7.64 – 7.52 (m, 6H), 7.32 – 7.22 (m, 3H), 7.13 (t, *J* = 9.3 Hz, 1H), 7.06 – 7.00 (m, 1H), 6.93 (s, 2H), 6.75 (d, *J* = 15.6 Hz, 1H), 6.64 (d, *J* = 8.6 Hz, 2H), 6.31 (dd, *J* = 15.0, 11.0 Hz, 1H), 5.99 – 5.94 (m, 2H), 5.77 (d, *J* = 11.0 Hz, 1H), 5.75 – 5.72 (m, 1H), 5.57 (dt, *J* = 14.9, 7.2 Hz, 2H), 5.41 (s, 2H), 5.34 (dd, *J* = 15.4, 3.6 Hz, 1H), 5.23 (d, *J* = 9.6 Hz, 1H), 5.09 (dt, *J* = 10.4, 4.9 Hz, 1H), 4.98 (d, *J* = 12.2 Hz, 1H), 4.93 (d, *J* = 9.2 Hz, 1H), 4.72 (s, 1H), 4.48 (s, 2H), 4.41 (dt, *J* = 13.7, 8.0 Hz, 1H), 4.36 – 4.14 (m, 4H), 4.07 (d, *J* = 17.7 Hz, 2H), 4.06 – 4.00 (m, 1H), 3.89 (q, *J* = 7.5 Hz, 1H), 3.71 (s, 1H), 3.66 (ddd, *J* = 11.8, 5.7, 2.0 Hz, 1H), 3.28 – 3.21 (m, 2H), 3.07 (s, 1H), 3.05 – 2.97 (m, 1H), 2.96 – 2.88 (m, 1H), 2.89 – 2.81 (m, 2H), 2.79 – 2.72 (m, 2H), 2.67 – 2.60 (m, 1H), 2.47 – 2.42 (m, 2H), 2.35 – 2.20 (m, 2H), 2.19 – 2.12 (m, 1H), 2.11 – 2.03 (m, 1H), 1.98 (d, *J* = 7.1 Hz, 2H), 1.97 – 1.82 (m, 2H), 1.74 (s, 3H), 1.67 (s, 3H), 1.63 (d, *J* = 6.4 Hz, 3H), 1.60 – 1.39 (m, 12H), 1.38 – 1.26 (m, 6H), 1.15 (dt, *J* = 14.9, 7.6 Hz, 2H), 0.98 (s, 2H), 0.89 – 0.84 (m, 6H), 0.84 – 0.81 (m, 3H), 0.73 (d, *J* = 7.1 Hz, 3H). <sup>13</sup>C-NMR (176 MHz, DMSO-*d*<sub>6</sub>) δ [ppm]: 174.47, 174.17, 174.01, 173.84, 173.78, 173.43, 173.40, 173.34, 172.14, 171.84, 171.81, 171.77, 171.58, 171.26, 170.52, 166.37, 166.30, 165.11, 163.53, 158.86, 158.05, 157.87, 157.69, 156.37, 155.69, 153.71, 150.79, 150.75, 148.60, 148.54, 146.71, 144.21, 138.50, 138.46, 138.23, 136.18, 135.32, 134.27, 132.05, 131.16, 129.35, 129.13, 129.09, 129.02, 128.42, 128.32, 127.93, 127.21, 126.80, 125.79, 125.49, 124.54, 121.24, 120.33, 118.85, 111.15, 77.83, 74.03, 73.55, 68.19, 64.90, 61.68, 60.04, 59.99, 56.52, 53.30, 52.99, 52.59, 52.33, 52.08, 51.98, 51.33, 47.22, 45.89, 40.02, 38.65, 31.82, 31.28, 30.48, 30.39, 30.34, 29.58, 29.52, 29.48, 29.21, 29.01, 28.89,



28.78, 28.69, 28.53, 26.75, 26.64, 26.43, 26.29, 25.21, 23.07, 22.92, 22.86, 22.23, 22.09, 22.00, 21.42, 20.79, 20.10, 19.35, 19.20, 18.86, 18.17, 18.14, 17.65, 17.51, 16.42, 15.72, 13.95, 11.08. **LRMS** (ESI-Quad) [m/z]: 940.6 [M+2H]<sup>2+</sup>, **HRMS** (ESI-IT) [m/z]: 940.98325, calculated 940.98163 for C<sub>96</sub>H<sub>128</sub>N<sub>20</sub>O<sub>20</sub> [M+2H]<sup>2+</sup>, err [ppm] 1.76.

### FA-9-Val-Cit-pABA-16R-Aminoratjadone

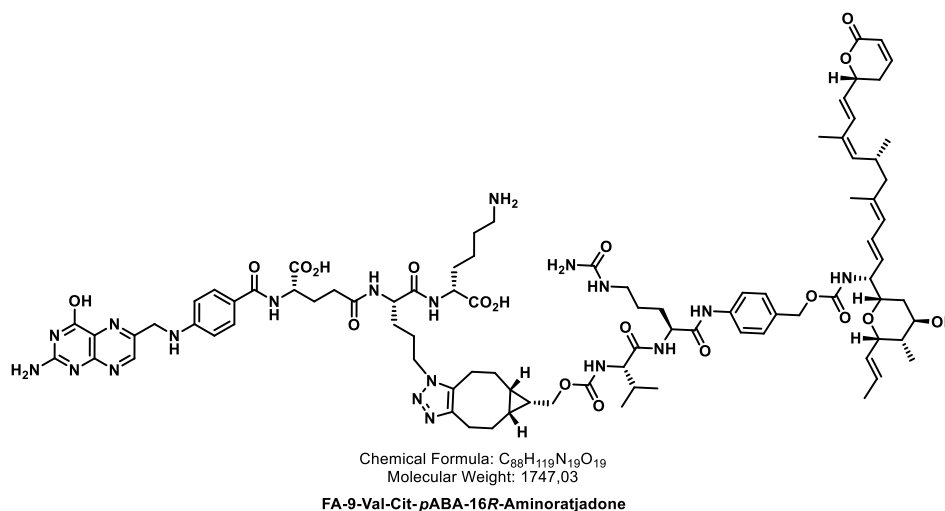

Applying **FA-N<sub>3</sub>-9** to the general procedure E, 1.0 mg (0.572 μmol, 26%) **FA-9-Val-Cit-PABA-16R-Aminoratjadone** was obtained as a mixture of diastereomers of TFA salts as a yellow, amorphous solid.

**FA-9-Val-Cit-pABA-16R-Aminoratjadone:** <sup>1</sup>H-NMR (700 MHz, DMSO-*d*<sub>6</sub>) δ [ppm]: 12.63 (s, 2H), 12.40 – 10.86 (m, 1H), 10.02 (s, 1H), 8.65 (s, 1H), 8.32 – 7.90 (m, 4H), 7.68 – 7.61 (m, 4H), 7.56 (d, *J* = 8.4 Hz, 2H), 7.30 (d, *J* = 8.8 Hz, 1H), 7.27 (d, *J* = 7.9 Hz, 2H), 7.14 – 7.09 (m, 1H), 7.03 (dq, *J* = 8.7, 2.8 Hz, 1H), 7.02 – 6.81 (m, 2H), 6.75 (d, *J* = 15.6 Hz, 1H), 6.64 (d, *J* = 8.5 Hz, 1H), 6.31 (dd, *J* = 14.9, 11.0 Hz, 1H), 5.98 (s, 1H), 5.97 (d, *J* = 9.9 Hz, 1H), 5.77 (d, *J* = 11.3 Hz, 1H), 5.75 – 5.71 (m, 1H), 5.57 (dt, *J* = 14.6, 7.3 Hz, 2H), 5.42 (s, 1H), 5.37 – 5.31 (m, 1H), 5.23 (d, *J* = 9.6 Hz, 1H), 5.09 (dt, *J* = 10.4, 5.4 Hz, 1H), 4.98 (d, *J* = 12.4 Hz, 1H), 4.93 (d, *J* = 12.4 Hz, 1H), 4.49 (s, 2H), 4.41 (s, 1H), 4.38 – 4.27 (m, 2H), 4.24 (s, 1H), 4.16 (d, *J* = 24.0 Hz, 3H), 4.09 (s, 2H), 4.03 (d, *J* = 7.3 Hz, 2H), 3.93 – 3.86 (m, 1H), 3.71 (s, 1H), 3.68 – 3.63 (m, 1H), 3.02 (s, 1H), 2.94 (s, 2H), 2.90 – 2.81 (m, 2H), 2.75 (s, 3H), 2.64 (s, 1H), 2.47 – 2.41 (m, 2H), 2.33 – 2.20 (m, 2H), 2.13 – 2.01 (m, 2H), 2.00 – 1.82 (m, 4H), 1.74 (s, 3H), 1.73 – 1.67 (m, 2H), 1.67 (s, 3H), 1.63 (d, *J* = 6.4 Hz, 3H), 1.60 – 1.41 (m, 10H), 1.40 – 1.25 (m, 4H), 1.16 – 1.05 (m, 8H), 0.94 – 0.84 (m, 3H), 0.83 (d, *J* = 6.6 Hz, 3H), 0.73 (d, *J* = 7.1 Hz, 3H). <sup>13</sup>C-NMR (176 MHz, DMSO-*d*<sub>6</sub>) δ [ppm]: 173.82, 173.76, 173.35, 173.32, 173.28, 173.27, 171.81, 171.64, 171.43, 171.39, 171.29, 171.07, 170.53, 166.31, 163.53, 160.85, 158.89, 158.19, 158.01, 157.82, 157.63, 156.36, 155.69, 153.63, 150.73, 148.78, 148.51, 146.71, 143.37, 138.49, 138.46, 136.18, 132.75,

132.05, 131.16, 129.35, 128.99, 128.32, 127.92, 127.22, 126.79, 125.79, 124.54, 121.35, 121.23, 120.33, 118.86, 117.43, 115.74, 111.15, 77.83, 74.03, 73.55, 68.19, 64.90, 61.69, 59.97, 59.92, 56.52, 53.01, 52.02, 51.96, 51.77, 51.35, 47.22, 46.82, 45.88, 40.15, 38.63, 33.65, 31.79, 31.75, 31.28, 30.50, 30.43, 30.38, 29.58, 29.48, 29.21, 29.00, 28.89, 28.72, 28.69, 28.53, 26.74, 26.63, 26.59, 26.48, 26.32, 26.00, 25.92, 25.37, 25.28, 24.48, 24.01, 22.20, 22.09, 21.81, 21.16, 20.79, 20.10, 20.04, 19.20, 19.14, 18.63, 18.54, 18.49, 18.14, 17.65, 17.28, 16.42, 13.95, 11.08. **LRMS** (ESI-Quad) [m/z]: 1748.0 [M+H]<sup>+</sup>, **HRMS** (ESI-IT) [m/z]: 873.9538, calculated 873.9538 for C<sub>88</sub>H<sub>121</sub>N<sub>19</sub>O<sub>19</sub> [M+2H]<sup>2+</sup>, err [ppm] 0.0.

### FA-10-Val-Cit-pABA-16R-Aminoratjadone

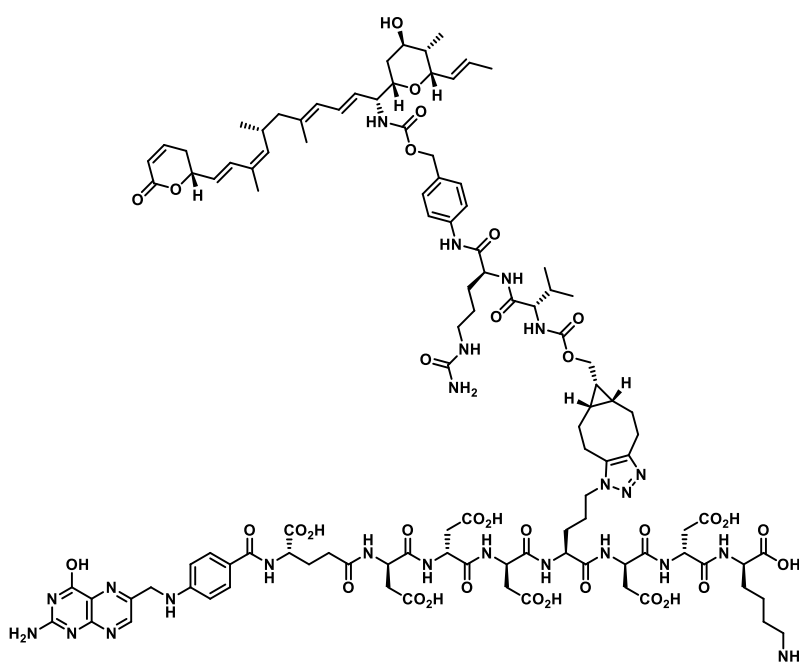

Chemical Formula: C<sub>108</sub>H<sub>144</sub>N<sub>24</sub>O<sub>34</sub>  
Molecular Weight: 2322.47

FA-10-Val-Cit-pABA-16R-Aminoratjadone

Applying **FA-N<sub>3</sub>-10** to the general procedure E, 1.8 mg (0.78 μmol, 24%) **FA-10-Val-Cit-pABA-16R-Aminoratjadone** was obtained as a mixture of diastereomers of TFA salts as a yellow, amorph solid.

**FA-10-Val-Cit-pABA-16R-Aminoratjadone:** <sup>1</sup>H-NMR (700 MHz, DMSO-*d*<sub>6</sub>) δ [ppm]: <sup>1</sup>H NMR (700 MHz, DMSO-*d*<sub>6</sub>) δ 12.39 (s, 6H), 11.50 (s, 1H), 10.03 (s, 1H), 8.65 (s, 1H), 8.49 – 7.96 (m, 6H), 7.79 (s, 1H), 7.69 – 7.64 (m, 2H), 7.60 (s, 2H), 7.58 – 7.56 (m, 2H), 7.32 – 7.22 (m, 1H), 7.27 (d, *J* = 7.5 Hz, 2H), 7.11 (s, 1H), 7.04 (dq, *J* = 9.5, 2.8 Hz, 1H), 6.94 (s, 1H), 6.75 (d, *J* = 15.6 Hz, 1H), 6.64 (d, *J* = 8.7 Hz, 2H), 6.36 – 6.27 (m, 1H), 6.00 (s, 1H), 5.97 (d, *J* = 9.8 Hz, 1H), 5.77 (d, *J* = 11.4 Hz, 1H), 5.76 – 5.72 (m, 1H), 5.56 (dd, *J* = 14.8, 7.0 Hz, 2H), 5.43 (s, 1H), 5.36 (d, *J* = 3.7 Hz, 1H), 5.23 (d, *J* = 9.6 Hz, 1H), 5.15 – 5.06 (m, 1H), 4.99 (d, *J* = 12.3 Hz, 1H), 4.93 (d, *J* = 12.2 Hz, 1H), 4.56 (s, 3H), 4.49 (s, 2H), 4.41 (s, 1H), 4.31 (s, 1H), 4.24 (s, 2H), 4.17 (s, 2H),

4.10 (s, 1H), 4.04 (s, 2H), 3.90 (d,  $J = 7.4$  Hz, 1H), 3.71 (s, 1H), 3.65 (s, 1H), 3.02 (s, 1H), 2.94 (s, 2H), 2.85 (dt,  $J = 16.1, 7.2$  Hz, 1H), 2.81 – 2.62 (m, 9H), 2.46 – 2.36 (m, 2H), 2.20 (d,  $J = 33.7$  Hz, 1H), 2.05 (s, 2H), 1.99 (d,  $J = 7.0$  Hz, 2H), 1.96 (d,  $J = 6.3$  Hz, 2H), 1.74 (s, 3H), 1.71 (s, 4H), 1.67 (s, 3H), 1.63 (d,  $J = 6.3$  Hz, 3H), 1.60 – 1.40 (m, 10H), 1.39 – 1.28 (m, 4H), 1.12 (s, 2H), 0.94 (s, 3H), 0.87 (d,  $J = 6.4$  Hz, 6H), 0.83 (d,  $J = 6.6$  Hz, 3H), 0.73 (d,  $J = 7.0$  Hz, 3H).  **$^{13}\text{C-NMR}$**  (176 MHz, DMSO- $d_6$ )  $\delta$  [ppm]:  $^{13}\text{C NMR}$  (176 MHz, DMSO)  $\delta$  173.73, 173.21, 171.94, 171.94, 171.91, 171.86, 171.84, 171.76, 171.73, 171.71, 171.62, 171.30, 171.05, 170.54, 170.47, 170.40, 170.36, 166.48, 166.34, 163.54, 160.88, 159.42, 158.93, 158.73, 158.16, 157.98, 157.80, 157.61, 156.37, 155.70, 153.64, 151.84, 150.88, 150.75, 148.78, 148.76, 148.72, 148.52, 147.49, 146.72, 143.27, 138.50, 138.50, 138.47, 136.19, 136.19, 131.16, 129.35, 129.03, 128.32, 127.94, 127.22, 126.80, 125.79, 124.54, 120.33, 118.86, 111.17, 77.83, 74.03, 73.56, 68.19, 64.91, 61.72, 59.94, 59.92, 59.87, 56.53, 54.91, 53.03, 52.50, 52.40, 52.02, 51.66, 51.60, 51.49, 49.89, 49.85, 49.82, 49.79, 49.73, 49.65, 49.60, 49.48, 47.22, 46.85, 45.88, 38.65, 35.95, 35.90, 35.71, 31.93, 31.88, 31.29, 30.44, 30.38, 30.28, 29.59, 29.49, 29.22, 29.01, 28.69, 26.73, 26.57, 26.46, 25.37, 25.31, 22.20, 22.08, 21.75, 21.70, 21.05, 20.80, 20.10, 19.20, 18.38, 18.15, 17.66, 17.24, 16.43, 13.96, 13.05, 11.08. **LRMS** (ESI-Quad) [m/z]: 1162.1 [M+H]<sup>+</sup>, **HRMS** (ESI-IT) [m/z]: 775.01786, calculated 775.01762 for C<sub>108</sub>H<sub>147</sub>N<sub>24</sub>O<sub>34</sub> [M+3H]<sup>3+</sup>, err [ppm] 0.309.

**FA-11-(Val-Cit-pABA-16R-Aminoratjadone)<sub>3</sub>**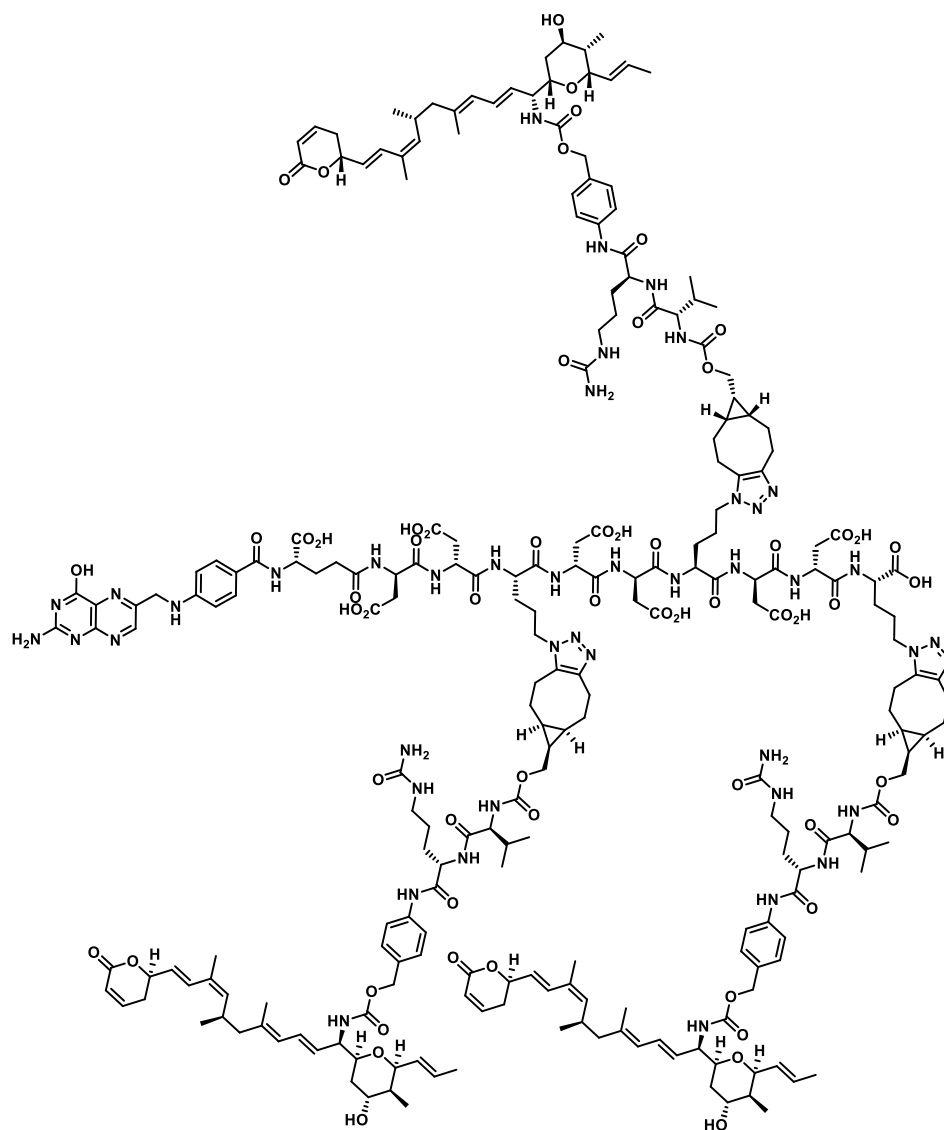

Chemical Formula: C<sub>232</sub>H<sub>313</sub>N<sub>43</sub>O<sub>60</sub>  
Molecular Weight: 4664,30

**FA-11-(Val-Cit-pABA-16R-Aminoratjadone)<sub>3</sub>**

Applying **FA-N<sub>3</sub>-11** to the general procedure E (modification 3.3 equiv of BCN-O(CO)HN-Val-Cit-pABO(CO)-16R-Aminoratjadone**25**), 4.7 mg (1.007 μmol, 54%) **FA-11-(Val-Cit-pABA-16R-Aminoratjadone)<sub>3</sub>** was obtained as a mixture of diastereomers as a yellow, amorphous solid.

**FA-11-(Val-Cit-pABA-16R-Aminoratjadone)<sub>3</sub>**: <sup>1</sup>H-NMR (700 MHz, DMSO-*d*<sub>6</sub>) δ [ppm]: 12.41 (s, 8H), 10.03 (s, 4H), 8.70 (s, 1H), 8.22 (s, 8H), 8.11 – 8.03 (m, 4H), 7.87 (s, 3H), 7.78 (s, 2H), 7.66 (d, *J* = 8.1 Hz, 2H), 7.57 (d, *J* = 8.2 Hz, 3H), 7.32 – 7.22 (m, 8H), 7.17 (d, *J* = 7.1 Hz, 12H), 7.16 – 7.13 (m, 1H), 7.13 – 7.07 (m, 1H), 7.03 (dq, *J* = 8.5, 2.8 Hz, 3H), 7.00 (s, 1H), 6.75 (d, *J* = 15.6 Hz, 3H), 6.64 (d, *J* = 7.4 Hz, 2H), 6.31 (dd, *J* = 14.7, 11.2 Hz, 3H), 6.03 (s, 3H), 5.97 (d, *J* = 9.7 Hz, 3H), 5.77 (d, *J* = 11.4 Hz, 2H), 5.73 (d, *J* = 6.6 Hz, 3H), 5.57 (dt,

$J = 14.6, 7.1$  Hz, 6H), 5.38 – 5.30 (m, 3H), 5.23 (d,  $J = 9.5$  Hz, 3H), 5.09 (dt,  $J = 10.3, 5.4$  Hz, 3H), 4.99 (d,  $J = 12.3$  Hz, 3H), 4.93 (d,  $J = 12.1$  Hz, 3H), 4.79 – 4.66 (m, 2H), 4.58 (s, 3H), 4.53 (s, 3H), 4.41 (s, 3H), 4.31 (d,  $J = 31.4$  Hz, 3H), 4.24 (s, 1H), 4.22 (s, 3H), 4.17 (s, 3H), 4.09 (s, 3H), 4.06 – 3.97 (m, 3H), 3.90 (s, 7H), 3.71 (s, 3H), 3.66 (dd,  $J = 10.8, 4.5$  Hz, 3H), 3.01 (s, 3H), 2.98 – 2.90 (m, 9H), 2.85 (dt,  $J = 13.9, 7.0$  Hz, 3H), 2.78 – 2.72 (m, 5H), 2.70 – 2.64 (m, 7H), 2.57 – 2.50 (m, 3H), 2.46 – 2.39 (m, 6H), 2.15 – 2.01 (m, 6H), 2.00 – 1.92 (m, 10H), 1.74 (s, 9H), 1.72 – 1.68 (m, 6H), 1.67 (s, 9H), 1.63 (d,  $J = 6.4$  Hz, 9H), 1.60 – 1.52 (m, 14H), 1.51 – 1.47 (m, 6H), 1.45 (d,  $J = 12.3$  Hz, 6H), 1.40 – 1.35 (m, 3H), 1.32 (d,  $J = 13.3$  Hz, 3H), 1.11 (s, 6H), 0.97 – 0.89 (m, 6H), 0.87 (d,  $J = 6.4$  Hz, 18H), 0.83 (d,  $J = 6.3$  Hz, 9H), 0.73 (d,  $J = 7.0$  Hz, 9H). <sup>13</sup>C-NMR (176 MHz, DMSO-*d*<sub>6</sub>)  $\delta$  [ppm]: 173.76, 172.97, 171.96, 171.87, 171.75, 171.72, 171.69, 171.62, 171.58, 171.46, 171.44, 171.30, 171.20, 171.12, 171.06, 171.03, 171.00, 170.95, 170.91, 170.89, 170.84, 170.54, 170.42, 170.40, 170.34, 170.21, 170.16, 166.32, 163.54, 160.05, 158.96, 158.88, 158.60, 158.39, 158.18, 157.97, 156.37, 156.17, 155.71, 152.98, 150.65, 150.27, 150.23, 148.15, 146.71, 143.24, 143.18, 138.85, 138.50, 137.34, 136.19, 132.92, 132.05, 132.00, 131.30, 131.26, 131.17, 129.47, 129.35, 129.24, 129.20, 129.17, 129.16, 129.04, 129.00, 128.90, 128.83, 128.33, 128.24, 128.20, 128.11, 127.96, 127.22, 126.80, 126.55, 126.53, 125.85, 125.80, 125.31, 124.55, 124.40, 121.34, 120.34, 118.87, 118.07, 116.42, 114.77, 113.11, 111.21, 77.83, 74.25, 74.04, 73.64, 73.56, 68.29, 68.20, 64.92, 61.71, 59.94, 59.89, 56.53, 54.91, 54.22, 53.04, 52.11, 52.08, 52.06, 52.04, 52.00, 51.33, 49.93, 49.89, 49.85, 49.81, 49.75, 49.73, 49.69, 49.64, 49.60, 49.54, 49.46, 49.42, 49.38, 49.36, 49.32, 47.34, 47.23, 47.15, 46.92, 46.70, 46.68, 45.81, 40.02, 38.66, 36.31, 36.28, 36.15, 36.08, 36.02, 36.00, 35.96, 35.92, 35.58, 31.88, 31.29, 31.16, 30.45, 30.40, 30.00, 29.89, 29.83, 29.60, 29.49, 29.33, 29.23, 29.01, 28.90, 28.73, 28.70, 28.54, 27.97, 26.81, 26.72, 26.54, 25.85, 25.67, 25.63, 25.31, 25.26, 22.22, 22.14, 21.76, 21.70, 21.13, 21.05, 20.92, 20.80, 20.61, 20.56, 20.11, 20.05, 19.20, 18.59, 18.55, 18.43, 18.16, 17.66, 17.27, 16.44, 15.73, 13.96, 11.13, 11.09. **LRMS** (ESI-Quad) [m/z]: 1555.5 [M+3H]<sup>3+</sup>, **HRMS** (ESI-IT) [m/z]: 1167.07950, calculated 1166.82785 for C<sub>232</sub>H<sub>317</sub>N<sub>43</sub>O<sub>60</sub> [M+4H]<sup>4+</sup>, 933.864661, calculated 933.663738 for C<sub>232</sub>H<sub>318</sub>N<sub>43</sub>O<sub>60</sub> [M+5H]<sup>5+</sup>

**General procedure F for the synthesis of Folate-Aminoratjadone Conjugates via copper-mediated click reaction.**

The corresponding **FA-N<sub>3</sub>** (1.1 equiv) and the corresponding Ratjadone payload (**26**, **21**, **34** or **20**) (1.0 equiv) were dissolved in a mixture of DMSO:H<sub>2</sub>O:tBuOH/2:1:1 were added DiPEA (6.0 eq), TBTA (0.1 eq, 10  $\mu$ L from a stock solution in DMSO), CuSO<sub>4</sub> (0.05 eq, 10  $\mu$ L from a stock solution in H<sub>2</sub>O) and sodium ascorbate (0.5 eq, 10  $\mu$ L from a stock solution in H<sub>2</sub>O) and the mixture was stirred under light exclusion for 4-24 h at 23°C until complete conversion was monitored by LCMS. The reaction mixture was diluted with 100  $\mu$ L of MeOH, filtered through a Whatman filter (45  $\mu$ m) and directly purified by RP prep HPLC

(Phenomenex Gemini C18 RP-column 00G-4435-PO-AX, 5  $\mu\text{m}$ , 110 A, 250 $\times$ 21.20 mm, Flow: 9 mL/min, ACN:H<sub>2</sub>O + 0.1% TFA/ 10:90  $\rightarrow$  95:5 in 45 min) yielding the Folate-Ratjadone Conjugates after lyophilization as yellow, amorph solids.

### FA-3-L-16R-Aminoratjadone

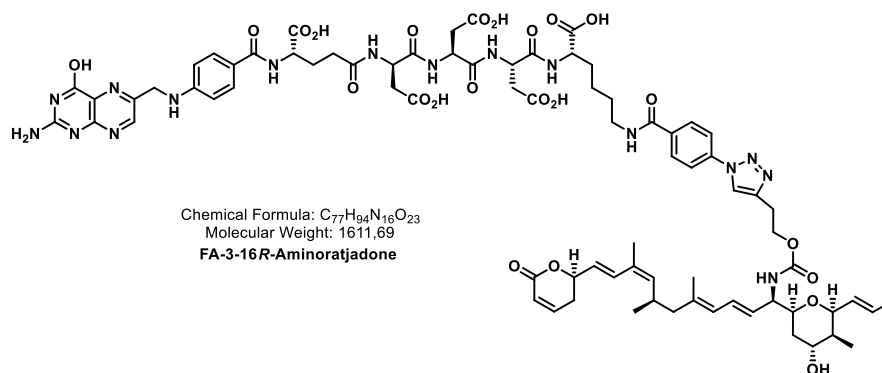

Applying **FA-N<sub>3</sub>-3** and 16R-Aminoratjadone derivative **21** to the general procedure F, 2.7 mg (1.58  $\mu\text{mol}$ , 42%) **FA-3-16R-Aminoratjadone** was obtained as a mixture of diastereomers a yellow, amorph solid.

**FA-3-L-16R-Aminoratjadone:** <sup>1</sup>H-NMR (700 MHz, DMSO-*d*<sub>6</sub>)  $\delta$  [ppm]: 12.31 (s, 5H), 11.42 (s, 1H), 8.70 (s, 1H), 8.64 (s, 1H), 8.59 (s, 1H), 8.39 – 8.10 (m, 3H), 8.04 (d, *J* = 8.2 Hz, 2H), 8.02 – 7.97 (m, 2H), 7.96 (d, *J* = 8.3 Hz, 2H), 7.73 – 7.57 (m, 3H), 7.25 (d, *J* = 9.2 Hz, 1H), 7.09 – 6.82 (m, 3H), 6.74 (d, *J* = 15.7 Hz, 1H), 6.64 (d, *J* = 8.3 Hz, 2H), 6.34 – 6.27 (m, 1H), 5.97 (d, *J* = 9.5 Hz, 2H), 5.74 (dt, *J* = 15.9, 6.5 Hz, 2H), 5.62 – 5.49 (m, 2H), 5.34 (d, *J* = 14.4 Hz, 1H), 5.22 (d, *J* = 9.6 Hz, 1H), 5.09 (dt, *J* = 10.4, 5.1 Hz, 1H), 4.72 (s, 1H), 4.62 – 4.51 (m, 2H), 4.51 – 4.42 (m, 3H), 4.36 – 4.20 (m, 4H), 4.14 (s, 1H), 4.00 (s, 1H), 3.70 (s, 1H), 3.67 – 3.56 (m, 2H), 3.04 – 3.01 (m, 2H), 2.88 – 2.80 (m, 1H), 2.79 – 2.64 (m, 2H), 2.46 (s, 4H), 2.33 – 2.16 (m, 2H), 1.97 (d, *J* = 6.3 Hz, 2H), 1.88 (d, *J* = 39.7 Hz, 2H), 1.74 (s, 1H), 1.73 (s, 3H), 1.64 (s, 3H), 1.62 (d, *J* = 5.7 Hz, 3H), 1.57 – 1.41 (m, 5H), 1.40 – 1.27 (m, 5H), 0.86 (d, *J* = 6.2 Hz, 3H), 0.84 – 0.77 (m, 2H), 0.70 (d, *J* = 6.8 Hz, 3H). <sup>13</sup>C-NMR (176 MHz, DMSO-*d*<sub>6</sub>)  $\delta$  [ppm]: 174.52, 174.16, 173.76, 173.29, 172.79, 172.43, 172.30, 172.16, 172.03, 171.93, 171.91, 171.81, 171.26, 171.13, 170.37, 166.37, 164.99, 163.58, 163.05, 160.89, 160.86, 157.77, 157.60, 157.43, 156.58, 156.54, 155.65, 153.74, 150.99, 150.96, 150.79, 149.97, 148.71, 148.46, 148.45, 146.74, 144.90, 138.53, 138.35, 136.24, 134.23, 131.19, 129.39, 129.03, 128.92, 127.94, 127.31, 126.81, 125.79, 124.60, 121.05, 120.34, 119.31, 118.26, 116.55, 111.20, 77.87, 74.08, 73.60, 68.21, 62.49, 56.52, 52.06, 52.01, 49.84, 49.80, 49.79, 49.54, 49.52, 47.23, 45.91, 35.81, 33.68, 31.30, 31.22, 30.69, 30.32, 30.17, 29.72, 29.59, 29.24, 29.04, 29.03, 28.99, 28.91, 28.74, 28.71, 28.68, 28.55, 26.58, 25.53, 24.51, 22.81, 22.11, 20.82, 20.11, 17.65, 16.40, 13.98, 11.08. **LRMS** (ESI-Quad) [m/z]: 1612.4 [M+H]<sup>+</sup>, **HRMS** (ESI-IT) [m/z]: 806.3405, calculated 806.3412 for C<sub>77</sub>H<sub>96</sub>N<sub>16</sub>O<sub>23</sub> [M+2H]<sup>2+</sup>, err [ppm] -0.639.

**FA-3-L-19-Aminoratjadone**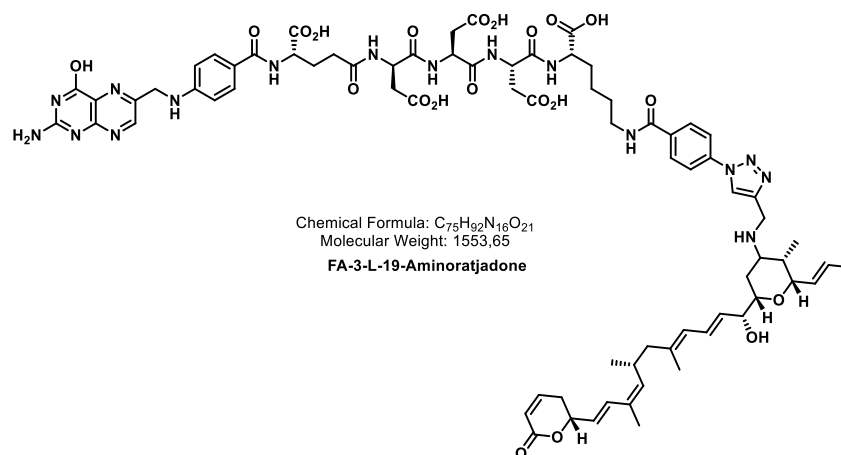

Applying **FA-N<sub>3</sub>-3** and 19-Aminoratjadone derivative **34** to the general procedure F, 1.2 mg (0.77  $\mu$ mol, 10%) **FA-3-L-19-Aminoratjadone** was obtained as a yellow, amorph solid.

**FA-3-L-19-Aminoratjadone:** LRMS (ESI-Quad) [m/z]: 777.8 [M+2H]<sup>2+</sup>, HRMS (ESI-IT) [m/z]: 777.3384, calculated 777.3384 for  $C_{75}H_{94}N_{16}O_{21}$  [M+2H]<sup>2+</sup>, err [ppm] 0.0.

**FA-3b-L-16R-Aminoratjadone**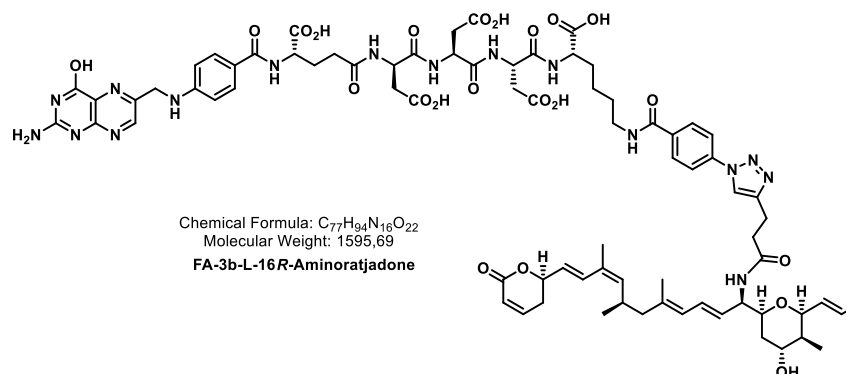

Applying **FA-N<sub>3</sub>-3** and 16R-Aminoratjadone derivative **21** to the general procedure F, 1.9 mg (1.19  $\mu$ mol, 17%) **FA-3b-L-16R-Aminoratjadone** was obtained as a yellow, amorph solid.

**FA-3b-L-16R-Aminoratjadone:** <sup>1</sup>H-NMR (700 MHz, DMSO-*d*<sub>6</sub>)  $\delta$  [ppm]: 12.33 (s, 5H), 11.58 (s, 1H), 8.65 (s, 1H), 8.58 (s, 1H), 8.57 (s, 1H), 8.48 – 8.11 (m, 3H), 8.03 (d, *J* = 8.3 Hz, 2H), 8.00 (d, *J* = 8.6 Hz, 1H), 7.97 (d, *J* = 9.0 Hz, 1H), 7.95 (d, *J* = 8.6 Hz, 2H), 7.70 – 7.68 (m, 1H), 7.67 – 7.65 (m, 2H), 7.04 (ddd, *J* = 9.6, 5.6, 2.8 Hz, 1H), 6.94 (s, 2H), 6.74 (d, *J* = 15.6 Hz, 1H), 6.67 – 6.57 (m, 1H), 6.27 (dd, *J* = 15.1, 11.0 Hz, 1H), 6.02 – 5.95 (m, 1H), 5.75 (d, *J* = 7.1 Hz, 1H), 5.73 (d, *J* = 6.7 Hz, 1H), 5.62 – 5.52 (m, 2H), 5.34 (ddd, *J* = 15.4, 5.5, 1.6 Hz, 1H), 5.21 (d, *J* = 9.5 Hz, 1H), 5.09 (dt, *J* = 10.5, 5.5 Hz, 1H), 4.62 – 4.43 (m, 6H), 4.35 – 4.29 (m, 1H),

4.24 – 4.21 (m, 1H), 4.16 – 4.11 (m, 1H), 3.68 – 3.65 (m, 1H), 3.65 – 3.59 (m, 1H), 3.30 – 3.23 (m, 2H), 2.95 (t,  $J = 7.5$  Hz, 2H), 2.86 – 2.62 (m, 6H), 2.45 (ddt,  $J = 18.6, 10.6, 2.6$  Hz, 2H), 2.32 – 2.17 (m, 2H), 2.10 – 2.03 (m, 1H), 1.96 (d,  $J = 7.1$  Hz, 2H), 1.89 – 1.81 (m, 1H), 1.73 (s, 3H), 1.62 (d,  $J = 9.3$  Hz, 6H), 1.56 – 1.50 (m, 3H), 1.47 (q,  $J = 9.1, 7.6$  Hz, 2H), 1.44 – 1.39 (m, 2H), 1.38 – 1.32 (m, 3H), 1.30 – 1.28 (m, 1H), 1.27 (s, 1H), 0.85 (d,  $J = 6.6$  Hz, 3H), 0.83 (d,  $J = 6.7$  Hz, 1H), 0.71 (d,  $J = 7.1$  Hz, 3H).  $^{13}\text{C-NMR}$  (176 MHz, DMSO- $d_6$ )  $\delta$  [ppm]: 174.16, 174.12, 173.74, 173.71, 173.70, 173.25, 172.26, 172.14, 172.09, 171.98, 171.93, 171.89, 171.87, 171.76, 171.74, 171.09, 170.99, 170.77, 170.63, 170.33, 170.25, 167.02, 166.33, 164.95, 163.55, 160.78, 158.26, 158.04, 157.85, 157.66, 153.57, 150.91, 150.74, 148.90, 148.49, 147.49, 146.73, 138.54, 138.36, 136.06, 134.09, 131.24, 129.41, 129.02, 128.99, 128.87, 127.95, 127.08, 126.78, 125.79, 124.61, 121.31, 121.28, 120.33, 120.24, 119.17, 111.17, 77.88, 74.09, 73.67, 68.21, 53.94, 52.00, 51.96, 49.76, 49.46, 47.21, 45.87, 38.74, 36.05, 35.99, 35.86, 35.80, 34.67, 31.93, 31.83, 31.28, 30.65, 30.27, 29.81, 29.56, 29.23, 29.01, 28.67, 26.55, 22.78, 21.44, 20.79, 20.08, 17.64, 16.38, 15.62, 13.96, 11.06. **LRMS** (ESI-Quad) [m/z]: 1596.7 [M+H]<sup>+</sup>, **HRMS** (ESI-IT) [m/z]: 798.34173, calculated 798.34370 for C<sub>77</sub>H<sub>96</sub>N<sub>16</sub>O<sub>22</sub> [M+H]<sup>+</sup>, err [ppm] -2.41.

#### FA-5-L-16R-Aminoratjadone

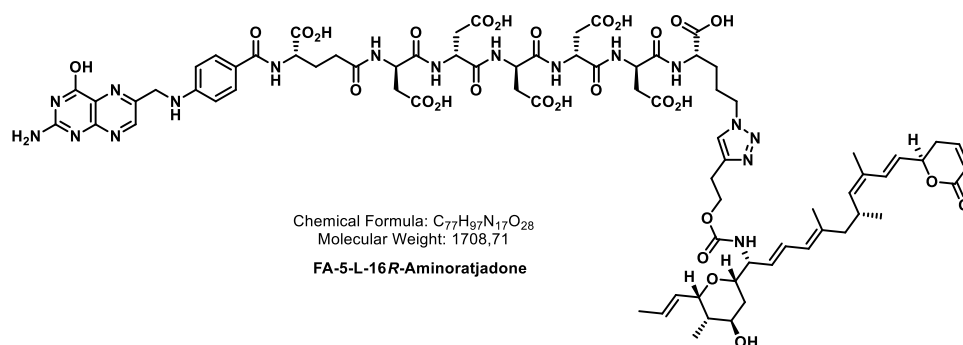

Applying **FA-N<sub>3</sub>-5** and 16R-Aminoratjadone derivative **21** to the general procedure F, 1.1 mg (0.68  $\mu\text{mol}$ , 18%) **FA-5-L-16R-Aminoratjadone** was obtained as a yellow, amorph solid.

**FA-5-L-16R-Aminoratjadone:**  $^1\text{H-NMR}$  (700 MHz, DMSO- $d_6$ )  $\delta$  [ppm]: 12.37 (s, 7H), 11.55 (s, 1H), 8.66 (s, 1H), 8.24 – 8.12 (m, 3H), 8.12 – 7.95 (m, 4H), 7.88 (s, 2H), 7.86 – 7.78 (m, 1H), 7.66 (d,  $J = 8.0$  Hz, 2H), 7.21 (d,  $J = 9.0$  Hz, 1H), 7.07 – 7.01 (m, 3H), 7.10 – 6.86 (m, 1H), 6.75 (d,  $J = 15.6$  Hz, 1H), 6.67 – 6.60 (m, 2H), 6.31 (dd,  $J = 15.1, 11.0$  Hz, 1H), 6.03 – 5.93 (m, 1H), 5.77 (d,  $J = 10.2$  Hz, 1H), 5.76 – 5.72 (m, 1H), 5.62 – 5.53 (m, 2H), 5.38 – 5.33 (m, 1H), 5.24 (d,  $J = 9.6$  Hz, 1H), 5.10 (dt,  $J = 10.4, 5.4$  Hz, 1H), 4.59 – 4.50 (m, 4H), 4.33 – 4.24 (m, 3H), 4.24 (s, 2H), 4.21 – 4.12 (m, 4H), 3.98 (d,  $J = 7.3$  Hz, 1H), 3.72 (s, 1H), 3.64 (s, 1H), 2.90 (q,  $J = 6.9$  Hz, 2H), 2.85 (dt,  $J = 14.0, 7.1$  Hz, 1H), 2.81 – 2.63 (m, 6H), 2.56 – 2.51 (m, 2H), 2.44 (ddd,  $J =$



18.6, 8.0, 5.4 Hz, 2H), 2.34 – 2.15 (m, 3H), 2.10 – 2.02 (m, 1H), 1.99 (d,  $J = 7.0$  Hz, 2H), 1.95 – 1.85 (m, 2H), 1.84 – 1.75 (m, 2H), 1.74 (s, 3H), 1.67 (s, 3H), 1.63 (d,  $J = 6.4$  Hz, 3H), 1.62 – 1.54 (m, 2H), 1.52 – 1.41 (m, 4H), 1.33 (d,  $J = 12.6$  Hz, 1H), 0.87 (d,  $J = 6.6$  Hz, 3H), 0.85 (d,  $J = 7.2$  Hz, 1H), 0.72 (d,  $J = 7.1$  Hz, 3H).  $^{13}\text{C-NMR}$  (176 MHz, DMSO- $d_6$ )  $\delta$  [ppm]: 174.21, 174.08, 173.74, 173.72, 172.83, 171.87, 171.83, 171.81, 171.57, 170.53, 170.27, 170.22, 166.80, 166.31, 163.53, 160.76, 158.07, 157.88, 155.62, 153.55, 150.85, 150.72, 148.92, 148.48, 146.71, 143.14, 138.51, 136.18, 132.92, 131.18, 129.34, 129.15, 129.01, 128.78, 127.94, 127.30, 126.79, 125.81, 124.54, 122.38, 120.33, 111.16, 77.82, 74.05, 73.53, 68.19, 62.78, 56.52, 51.28, 49.64, 49.58, 49.54, 48.73, 47.21, 45.86, 40.42, 38.65, 36.07, 35.84, 31.93, 31.28, 30.25, 29.73, 29.56, 29.20, 29.00, 28.69, 27.93, 26.56, 26.17, 25.52, 22.08, 20.77, 20.09, 20.03, 17.64, 16.41, 11.08. **LRMS** (ESI-Quad) [m/z]: 1709.9 [M+H] $^+$ , **HRMS** (ESI-IT) [m/z]: 854.8417, calculated 854.8417 for  $\text{C}_{77}\text{H}_{99}\text{N}_{17}\text{O}_{28}$  [M+2H] $^{2+}$ , err [ppm] 0.0.

### FA-6-L-16R-Aminoratjadone

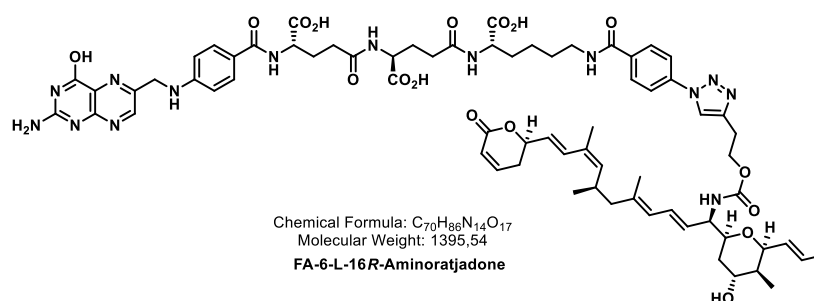

Applying **FA-N<sub>3</sub>-6** and 16R-Aminoratjadone derivative **21** to the general procedure F, 3.6 mg (2.58  $\mu\text{mol}$ , 64%) **FA-6-L-16R-Aminoratjadone** was obtained as a yellow, amorph solid.

**FA-6-L-16R-Aminoratjadone:**  $^1\text{H-NMR}$  (700 MHz, DMSO- $d_6$ )  $\delta$  [ppm]: 12.51 (s, 3H), 11.60 (s, 1H), 8.71 (s, 1H), 8.66 (s, 1H), 8.63 – 8.53 (m, 1H), 8.21 (dd,  $J = 12.0, 7.9$  Hz, 1H), 8.17 – 8.13 (m, 1H), 8.12 (t,  $J = 8.1$  Hz, 1H), 8.10 – 8.05 (m, 1H), 8.04 (d,  $J = 8.6$  Hz, 2H), 7.96 (d,  $J = 8.5$  Hz, 2H), 7.67 (t,  $J = 8.5$  Hz, 2H), 7.25 (d,  $J = 8.9$  Hz, 1H), 7.06 – 6.99 (m, 2H), 7.20 – 6.85 (m, 1H), 6.74 (d,  $J = 15.6$  Hz, 1H), 6.64 (t,  $J = 7.3$  Hz, 2H), 6.30 (dd,  $J = 14.7, 11.2$  Hz, 1H), 6.01 – 5.93 (m, 1H), 5.75 (s, 2H), 5.75 – 5.71 (m, 1H), 5.61 – 5.53 (m, 2H), 5.34 (d,  $J = 15.5$  Hz, 1H), 5.22 (d,  $J = 9.6$  Hz, 1H), 5.09 (dt,  $J = 10.5, 5.4$  Hz, 1H), 4.49 (s, 2H), 4.35 – 4.29 (m, 1H), 4.29 – 4.24 (m, 2H), 4.23 (s, 1H), 4.15 (s, 2H), 4.00 (d,  $J = 7.0$  Hz, 1H), 3.70 (s, 1H), 3.64 (s, 1H), 3.31 – 3.21 (m, 2H), 3.03 (t,  $J = 6.5$  Hz, 2H), 2.84 (dt,  $J = 14.9, 6.8$  Hz, 1H), 2.55 – 2.52 (m, 1H), 2.44 (ddt,  $J = 18.5, 10.6, 2.6$  Hz, 2H), 2.33 – 2.22 (m, 2H), 2.17 (ddd,  $J = 16.4, 12.5, 8.4$  Hz, 2H), 2.11 – 2.03 (m, 1H), 1.97 (d,  $J = 6.5$  Hz, 2H), 1.95 – 1.84 (m, 2H), 1.73 (s, 3H), 1.71 (s, 1H), 1.64 (s, 3H), 1.62 (d,  $J = 6.0$  Hz, 3H), 1.57 – 1.41 (m, 5H), 1.39 – 1.31 (m, 3H), 0.86 (d,  $J = 6.3$  Hz, 3H), 0.82 (s, 1H), 0.71 (d,  $J = 7.0$  Hz, 3H).  $^{13}\text{C-NMR}$  (176 MHz,

DMSO- $d_6$ )  $\delta$  [ppm]: 174.16, 174.13, 173.78, 173.76, 173.45, 173.41, 173.25, 173.15, 171.85, 171.81, 171.80, 171.69, 171.45, 171.41, 171.39, 166.39, 166.31, 164.92, 163.53, 160.69, 158.37, 158.18, 157.98, 157.79, 155.62, 153.49, 150.72, 149.07, 148.44, 146.70, 144.88, 138.51, 138.33, 136.20, 134.20, 131.18, 129.37, 129.07, 129.01, 128.87, 127.95, 127.27, 126.79, 125.78, 124.56, 121.40, 121.34, 121.03, 120.33, 119.28, 111.18, 74.06, 73.58, 68.19, 62.46, 56.50, 54.91, 52.62, 52.24, 51.76, 51.52, 51.37, 47.22, 45.87, 40.02, 38.66, 31.88, 31.71, 31.43, 31.34, 30.73, 30.47, 29.71, 29.57, 29.22, 29.02, 28.70, 27.21, 26.98, 26.68, 26.52, 25.51, 23.01, 20.79, 20.09, 17.63, 16.37, 11.06. **LRMS** (ESI-Quad) [m/z]: 1396.3 [M+H]<sup>+</sup>, **HRMS** (ESI-IT) [m/z]: 698.32208, calculated 698.32204 for C<sub>70</sub>H<sub>87</sub>N<sub>14</sub>O<sub>17</sub> [M+2H]<sup>2+</sup>, err [ppm] 0.057.

### FA-7-L-16R-Aminoratjadone

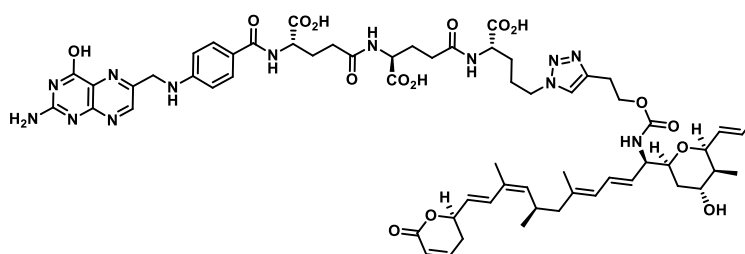

Chemical Formula: C<sub>62</sub>H<sub>79</sub>N<sub>13</sub>O<sub>16</sub>  
Molecular Weight: 1262.39  
FA-7-L-16R-Aminoratjadone

Applying **FA-N<sub>3</sub>-7** and 16R-Aminoratjadone derivative **21** to the general procedure F, 2.4 mg (1.90  $\mu$ mol, 48%) **FA-7-L-16R-Aminoratjadone** was obtained as a yellow, amorph solid.

**FA-7-L-16R-Aminoratjadone:** <sup>1</sup>H-NMR (700 MHz, DMSO- $d_6$ )  $\delta$  [ppm]: 12.52 (s, 3H), 8.67 (s, 1H), 8.26 – 8.03 (m, 3H), 7.99 – 7.81 (m, 2H), 7.70 – 7.58 (m, 2H), 7.21 (d,  $J$  = 8.8 Hz, 1H), 7.04 (ddd,  $J$  = 9.5, 5.5, 2.8 Hz, 1H), 6.75 (d,  $J$  = 15.6 Hz, 1H), 6.64 (t,  $J$  = 6.8 Hz, 2H), 6.31 (dd,  $J$  = 15.0, 11.1 Hz, 1H), 5.97 (d,  $J$  = 9.7 Hz, 1H), 5.80 – 5.67 (m, 2H), 5.63 – 5.52 (m, 2H), 5.35 (dd,  $J$  = 15.4, 3.6 Hz, 1H), 5.23 (d,  $J$  = 9.5 Hz, 1H), 5.09 (dt,  $J$  = 10.4, 5.4 Hz, 1H), 4.51 (s, 2H), 4.47 – 4.38 (m, 1H), 4.29 (s, 3H), 4.24 (s, 2H), 4.21 – 4.14 (m, 4H), 4.01 – 3.96 (m, 1H), 3.72 (s, 1H), 3.64 (d,  $J$  = 6.0 Hz, 1H), 2.90 (t,  $J$  = 6.5 Hz, 2H), 2.85 (dt,  $J$  = 15.8, 7.1 Hz, 1H), 2.48 – 2.40 (m, 2H), 2.33 – 2.12 (m, 4H), 1.99 (d,  $J$  = 6.9 Hz, 2H), 1.97 – 1.86 (m, 2H), 1.81 (d,  $J$  = 6.8 Hz, 2H), 1.74 (s, 3H), 1.67 (s, 3H), 1.63 (d,  $J$  = 6.1 Hz, 3H), 1.56 – 1.40 (m, 4H), 1.33 (d,  $J$  = 13.2 Hz, 1H), 0.87 (d,  $J$  = 6.5 Hz, 3H), 0.82 (s, 1H), 0.72 (d,  $J$  = 7.1 Hz, 3H). <sup>13</sup>C-NMR (176 MHz, DMSO- $d_6$ )  $\delta$  [ppm]: 174.20, 173.40, 171.87, 171.47, 166.36, 163.60, 155.69, 153.42, 150.74, 148.43, 146.77, 143.20, 138.56, 136.25, 131.20, 129.40, 129.04, 127.97, 127.34, 126.82, 125.82, 124.60, 122.50, 122.45, 121.44, 121.39, 121.36, 121.32, 120.35, 111.22, 77.88, 74.08, 73.59, 68.23, 62.81, 56.55, 54.93, 51.50, 51.32, 48.85, 47.26, 45.87, 38.69, 31.46, 31.39, 31.34, 30.48, 29.76, 29.60, 29.24, 28.04, 26.95, 26.45, 25.56, 20.82, 20.13, 17.68, 16.44, 11.11.

**LRMS** (ESI-Quad) [m/z]: 1263.8 [M+H]<sup>+</sup>, **HRMS** (ESI-IT) [m/z]: 631.79626, calculated 631.79566 for C<sub>62</sub>H<sub>81</sub>N<sub>13</sub>O<sub>16</sub> [M+2H]<sup>2+</sup>, err [ppm] -0.949.

### FA-8-L-16R-Aminoratjadone

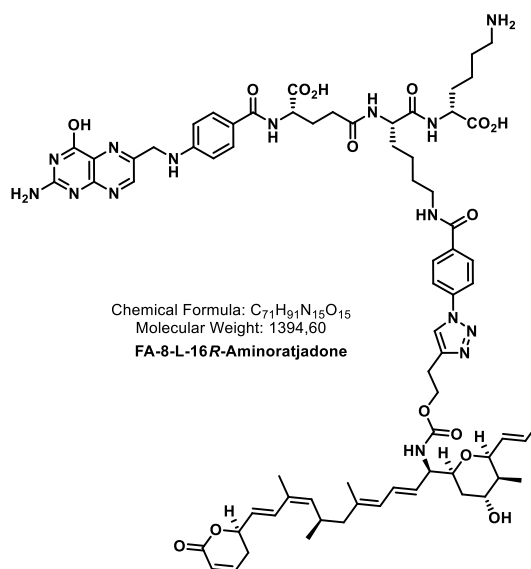

Applying **FA-N<sub>3</sub>-8** and 16R-Aminoratjadone derivative **21** to the general procedure F, 1.4 mg (1.00 μmol, 28%) **FA-8-16R-Aminoratjadone** was obtained as a TFA salt as a yellow, amorph solid.

**FA-8-L-16R-Aminoratjadone: LRMS** (ESI-Quad) [m/z]: 698.2 [M+2H]<sup>2+</sup>, **HRMS** (ESI-IT) [m/z]: 697.84802, calculated 697.84823 for C<sub>23</sub>H<sub>34</sub>N<sub>5</sub>O<sub>6</sub> [M+H]<sup>+</sup>, err [ppm] -0.288.

### FA-9-L-16R-Aminoratjadone

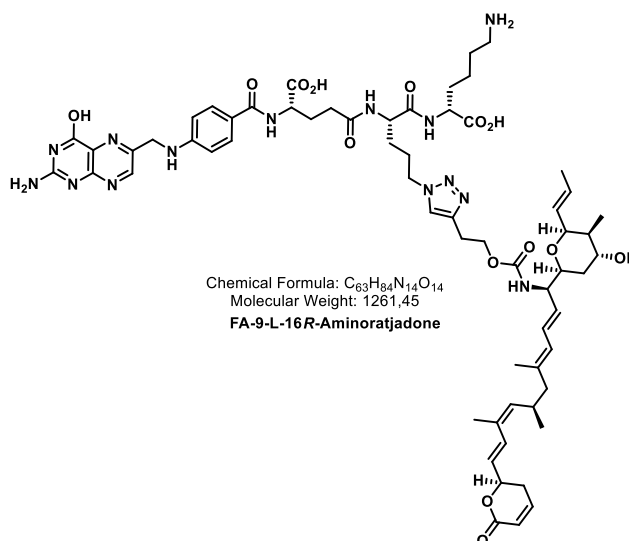

Applying **FA-N<sub>3</sub>-9** and 16*R*-Aminoratjadone derivative **21** to the general procedure F, 1.6 mg (1.26 μmol, 35%) **FA-9-L-16*R*-Aminoratjadone** was obtained as a TFA salt as a yellow, amorph solid.

**FA-9-L-16*R*-Aminoratjadone: LRMS** (ESI-Quad) [m/z]: 1261.9 [M+H]<sup>+</sup>, **HRMS** (ESI-IT) [m/z]: 613.3218, calculated 613.3218 for C<sub>63</sub>H<sub>86</sub>N<sub>14</sub>O<sub>14</sub> [M+H]<sup>+</sup>, err [ppm] 0.0.

#### **FA-10-L-16*R*-Aminoratjadone**

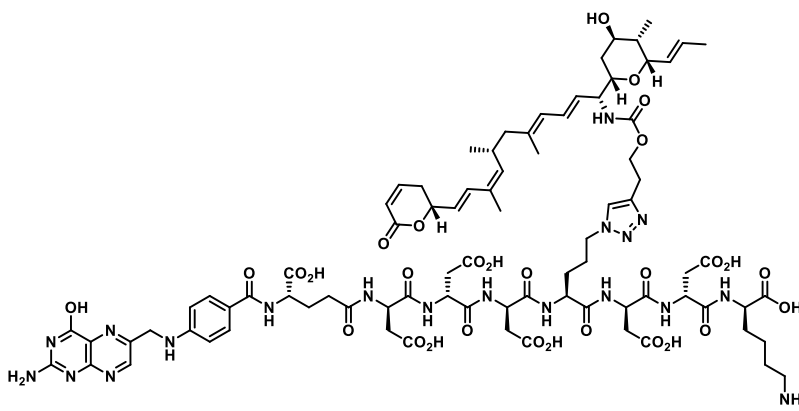

Chemical Formula: C<sub>23</sub>H<sub>109</sub>N<sub>19</sub>O<sub>29</sub>  
Molecular Weight: 1836.89

**FA-10-L-16*R*-Aminoratjadone**

Applying **FA-N<sub>3</sub>-10** and 16*R*-Aminoratjadone derivative **21** to the general procedure F, 2.5 mg (1.36 μmol, 34%) **FA-10-L-16*R*-Aminoratjadone** was obtained as a TFA salt as a yellow, amorph solid.

**FA-10-L-16*R*-Aminoratjadone: <sup>1</sup>H-NMR** (700 MHz, DMSO-*d*<sub>6</sub>) δ [ppm]: 12.37 (s, 7H), 11.49 (s, 1H), 8.65 (s, 1H), 8.49 – 7.95 (m, 7H), 7.85 (s, 2H), 7.79 (s, 2H), 7.66 (d, *J* = 8.6 Hz, 2H), 7.60 (s, 1H), 7.38 (t, *J* = 7.3 Hz, 1H), 7.33 (dd, *J* = 17.4, 6.9 Hz, 1H), 7.20 (s, 1H), 6.92 (s, 1H), 6.75 (d, *J* = 15.4 Hz, 2H), 6.64 (d, *J* = 8.7 Hz, 1H), 6.36 – 6.25 (m, 1H), 5.97 (d, *J* = 9.6 Hz, 1H), 5.77 (d, *J* = 10.1 Hz, 1H), 5.74 (d, *J* = 6.8 Hz, 1H), 5.65 (s, 1H), 5.61 – 5.53 (m, 2), 5.35 (ddd, *J* = 14.9, 4.6, 2.0 Hz, 1H), 5.24 (d, *J* = 9.7 Hz, 1H), 5.13 – 5.04 (m, 1H), 4.49 (s, 7H), 4.33 (s, 1H), 4.28 – 4.21 (m, 5H), 4.20 – 4.12 (m, 4H), 4.01 – 3.94 (m, 1H), 3.72 (s, 1H), 3.67 – 3.62 (m, 1H), 2.91 (s, 2H), 2.88 – 2.82 (m, 1H), 2.80 – 2.64 (m, 7H), 2.49 – 2.44 (m, 2H), 2.33 – 2.17 (m, 3H), 2.05 (s, 1H), 1.99 (d, *J* = 6.8 Hz, 2H), 1.94 – 1.84 (m, 2H), 1.74 (s, 3H), 1.73 – 1.69 (m, 2H), 1.67 (s, 3H), 1.63 (d, *J* = 6.2 Hz, 3H), 1.62 – 1.57 (m, 2H), 1.55 – 1.47 (m, 5H), 1.48 – 1.41 (m, 1H), 1.33 (d, *J* = 13.7 Hz, 3H), 0.87 (d, *J* = 6.4 Hz, 3H), 0.82 (s, 1H), 0.72 (d, *J* = 7.0 Hz, 3H). **<sup>13</sup>C-NMR** (176 MHz, DMSO-*d*<sub>6</sub>) δ [ppm]: 174.24, 174.08, 173.74, 173.20, 172.39, 171.91, 171.83, 171.76, 171.71, 170.98, 170.84, 170.58, 170.47, 170.35, 166.91, 166.35, 163.54, 160.89, 158.14, 157.96, 157.77, 157.59, 155.63, 153.69, 150.77, 148.68, 148.54, 146.72, 143.06, 138.52, 136.21, 135.81, 131.18, 129.36, 129.18, 129.02, 128.78, 128.19, 127.92, 127.39, 126.81, 125.81, 124.55, 122.28, 121.24, 120.33, 111.17, 77.84, 74.06, 73.54, 68.20, 62.82, 56.58, 54.91, 52.91, 52.10, 52.01, 51.60, 49.90, 49.77, 49.66, 49.47, 48.90, 47.22, 46.30, 45.89, 38.69, 36.26, 35.97,

35.72, 31.89, 30.27, 29.74, 29.57, 29.22, 29.00, 28.69, 26.57, 26.46, 25.85, 25.52, 22.07, 20.77, 20.10, 17.65, 16.42, 11.08. **LRMS** (ESI-Quad) [m/z]: 919.8 [M+2H]<sup>2+</sup>, **HRMS** (ESI-IT) [m/z]: 918.89078, calculated 918.88920 for C<sub>83</sub>H<sub>111</sub>N<sub>19</sub>O<sub>29</sub> [M+2H]<sup>2+</sup>, err [ppm] 1.719.

### Synthesis of FA-SS-16R-Aminoratjadone

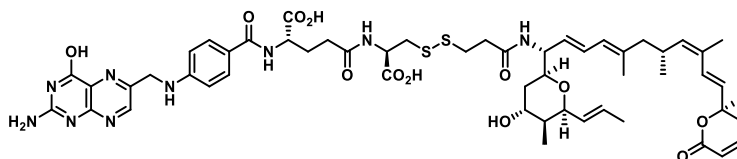

Chemical Formula: C<sub>53</sub>H<sub>67</sub>N<sub>9</sub>O<sub>12</sub>S<sub>2</sub>  
Molecular Weight: 1086.29

FA-SS-16R-Aminoratjadone

To a solution of 2.6 mg (4.72 μmol, 1.1 equiv) **FA-SH-1** in 1.22 mL ACN under Argon atm. was added a solution of 2.8 mg (4.28 μmol, 1.0 equiv) 2-PySS(CH<sub>2</sub>)<sub>2</sub>(CO)-16R-Aminoratjadone **31** in 1.22 mL PBS buffer (pH = 7.4) and the mixture was stirred for 4 h at 23°C. The ACN was removed by a nitrogen flow and 50 μL DMSO were added. The mixture was filtered through a Whatman filter (45 μm) and directly purified by RP prep HPLC (Phenomenex Gemini C18 RP-column 00G-4435-PO-AX, 5 μm, 110 A, 250×21.20 mm, Flow: 9 mL/min, ACN:H<sub>2</sub>O + 0.1% TFA/ 10:90 → 95:5 in 45 min) yielding after lyophilization 1.5 mg (1.38 μmol, 32%) **FA-SS-16R-Aminoratjadone** as yellow, amorph solid.

**FA-SS-16R-Aminoratjadone:** <sup>1</sup>H-NMR (700 MHz, DMSO-*d*<sub>6</sub>) δ [ppm]: 12.85 (s, 1H), 12.46 (s, 1H), 11.40 (s, 1H), 8.64 (s, 1H), 8.30 (t, *J* = 7.5 Hz, 1H), 8.19 (d, *J* = 7.3 Hz, 1H), 7.98 (d, *J* = 8.8 Hz, 1H), 7.66 (d, *J* = 8.6 Hz, 2H), 7.07 – 7.01 (m, 1H), 6.92 (s, 1H), 6.75 (d, *J* = 15.6 Hz, 1H), 6.64 (d, *J* = 8.7 Hz, 2H), 6.30 (dd, *J* = 15.1, 11.2 Hz, 1H), 5.97 (d, *J* = 9.7 Hz, 1H), 5.78 (d, *J* = 10.4 Hz, 1H), 5.74 (dd, *J* = 15.6, 6.6 Hz, 1H), 5.59 (td, *J* = 14.9, 6.6 Hz, 2H), 5.36 (dd, *J* = 15.4, 5.4 Hz, 1H), 5.23 (d, *J* = 9.6 Hz, 1H), 5.09 (dt, *J* = 10.4, 5.4 Hz, 1H), 4.74 (s, 3H), 4.47 (dd, *J* = 13.1, 4.2 Hz, 2H), 4.30 (p, *J* = 9.3, 8.9 Hz, 1H), 4.24 (s, 1H), 3.71 (s, 1H), 3.63 (dd, *J* = 11.8, 5.7 Hz, 1H), 3.52 (s, 2H), 3.13 – 3.05 (m, 1H), 2.93 – 2.84 (m, 2H), 2.71 (s, 1H), 2.32 – 2.20 (m, 2H), 2.09 – 2.01 (m, 2H), 1.98 (d, *J* = 6.9 Hz, 2H), 1.95 – 1.85 (m, 3H), 1.74 (s, 3H), 1.67 (s, 3H), 1.64 (d, *J* = 5.5 Hz, 3H), 1.52 – 1.41 (m, 4H), 1.34 (d, *J* = 11.9 Hz, 2H), 0.87 (d, *J* = 6.5 Hz, 3H), 0.82 (s, 1H), 0.74 (d, *J* = 7.1 Hz, 3H). <sup>13</sup>C-NMR (176 MHz, DMSO-*d*<sub>6</sub>) δ [ppm]: 173.74, 171.95, 169.26, 166.31, 163.54, 150.74, 146.72, 138.55, 136.08, 131.23, 129.41, 128.98, 128.88, 127.93, 127.14, 126.77, 125.84, 124.64, 124.52, 121.32, 120.32, 111.13, 77.87, 74.05, 73.66, 68.22, 54.03, 52.18, 51.28, 47.23, 45.91, 35.03, 33.96, 33.65, 31.92, 31.28, 31.20, 29.90, 29.82, 29.58, 29.22, 29.00, 28.89, 28.69, 26.57, 24.48, 22.09, 20.79, 20.09, 17.66, 16.45, 13.96, 11.08. **LRMS** (ESI-Quad) [m/z]: 1086.5 [M+H]<sup>+</sup>, **HRMS** (ESI-IT) [m/z]: 1086.44132, calculated 1086.44233 for C<sub>53</sub>H<sub>68</sub>N<sub>9</sub>O<sub>12</sub>S<sub>2</sub> [M+H]<sup>+</sup>, err [ppm] -0.929.

## LHRH-Aminoratjadone Conjugates

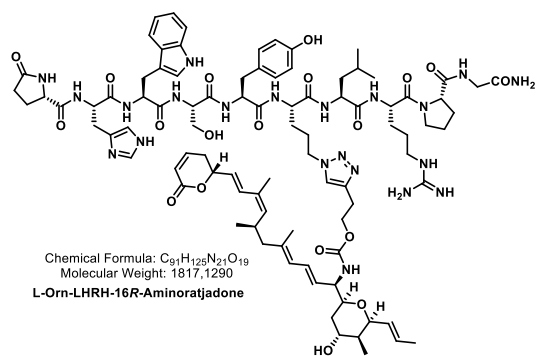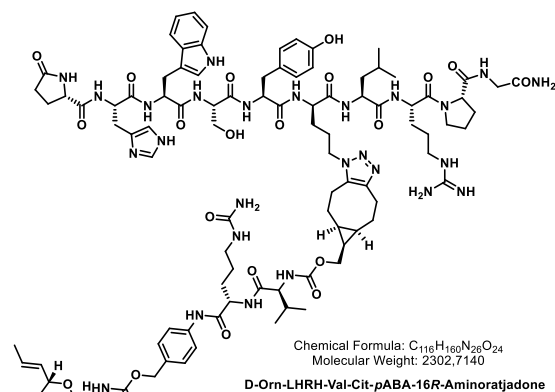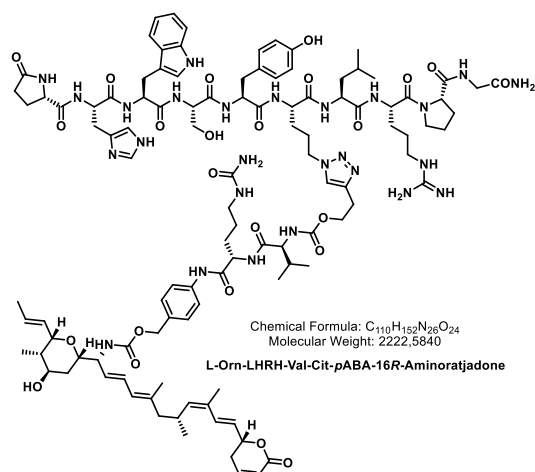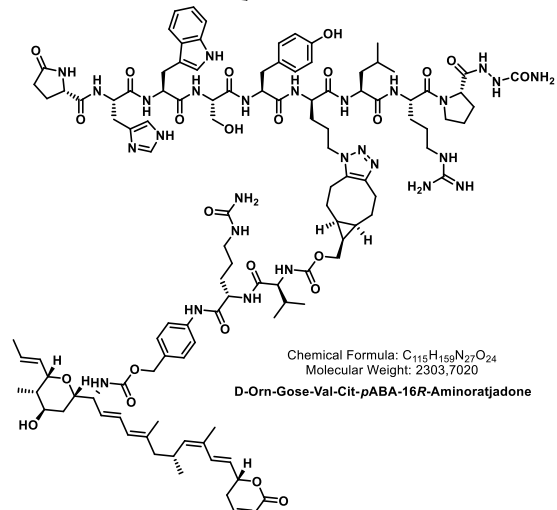

Figure S7: LHRH-Aminoratjadone conjugates synthesized in this study.

## Synthesis of L-Orn-LHRH-16R-Aminoratjadone

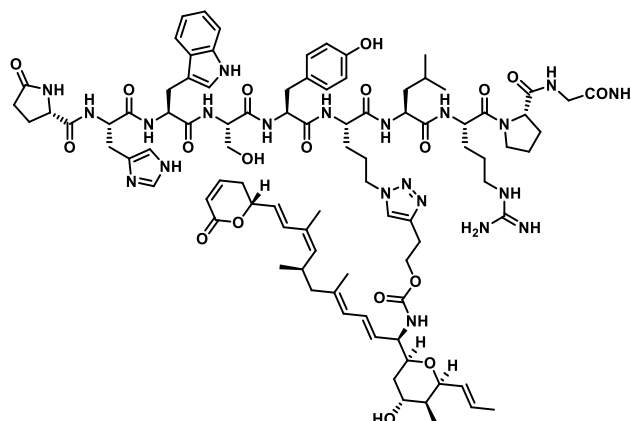

Chemical Formula:  $C_{31}H_{125}N_{21}O_{19}$   
 Molecular Weight: 1817,13  
 L-Orn-LHRH-16R-Aminoratjadone

To a solution of 5.4 mg (3.63  $\mu$ mol, 1.0 equiv) **L-Orn-N<sub>3</sub>-LHRH** and 2.0 mg (3.63  $\mu$ mol, 1.0 equiv) the 16R-Aminoratjadone derivative **21** in a mixture of DMSO:pH =7 phosphate buffer (100nM):tBuOH/2:2:1 (72  $\mu$ L) were added 0.48 mg (0.9065 $\mu$ mol, 0.25 eq, 10  $\mu$ L from a stock solution in DMSO) TBTA, 66  $\mu$ g (0.363  $\mu$ mol, 0.1 eq, 10  $\mu$ L from a stock solution in H<sub>2</sub>O) CuOAc, 2.39 mg (10.875  $\mu$ mol, 3.0 equiv) zinc acetate and 718  $\mu$ g (3.63  $\mu$ mol, 1.0 eq, 10  $\mu$ L from a stock solution in H<sub>2</sub>O) sodium ascorbate and the mixture was stirred under light exclusion for 1 h at 23°C until complete conversion was monitored by LCMS. The reaction mixture was diluted with 100  $\mu$ L of MeOH, filtered through a Whatman filter (45  $\mu$ m) and directly purified by RP prep HPLC (Phenomenex Gemini C18 RP-column 00G-4435-PO-AX, 5  $\mu$ m, 110 A, 250 $\times$ 21.20 mm, Flow: 9 mL/min, ACN:H<sub>2</sub>O + 0.1% TFA/ 10:90  $\rightarrow$  95:5 in 45 min) yielding after lyophilization 4.6 mg (2.53  $\mu$ mol, 70%) **L-Orn-LHRH-16R-Aminoratjadone** TFA salt as a white, amorph solid.

**L-Orn-LHRH-16R-Aminoratjadone:** <sup>1</sup>H-NMR (700 MHz, DMSO-*d*<sub>6</sub>)  $\delta$  [ppm]: 13.98 (s, 2H), 10.78 (s, 1H), 9.18 (s, 1H), 8.91 (s, 1H), 8.32 – 8.26 (m, 1H), 8.23 (t, *J* = 5.8 Hz, 1H), 8.20 (d, *J* = 7.2 Hz, 1H), 8.11 (s, 2H), 8.07 (d, *J* = 8.1 Hz, 1H), 8.05 – 8.02 (m, 1H), 7.99 (d, *J* = 7.5 Hz, 1H), 7.84 (d, *J* = 6.6 Hz, 1H), 7.68 (s, 1H), 7.61 (d, *J* = 7.9 Hz, 1H), 7.41 – 7.37 (m, 1H), 7.36 (d, *J* = 7.6 Hz, 1H), 7.30 (q, *J* = 10.6, 9.5 Hz, 3H), 7.26 (s, 1H), 7.20 (d, *J* = 9.0 Hz, 2H), 7.14 (d, *J* = 5.9 Hz, 1H), 7.12 (d, *J* = 1.9 Hz, 1H), 7.08 (d, *J* = 4.0 Hz, 1H), 7.06 – 7.02 (m, 4H), 6.91 (t, *J* = 7.5 Hz, 1H), 6.75 (d, *J* = 15.6 Hz, 1H), 6.64 (d, *J* = 8.4 Hz, 3H), 6.31 (dd, *J* = 14.8, 10.6 Hz, 1H), 6.03 – 5.93 (m, 1H), 5.77 (d, *J* = 11.6 Hz, 1H), 5.76 – 5.70 (m, 1H), 5.58 (ddd, *J* = 20.1, 14.2, 6.9 Hz, 3H), 5.38 – 5.30 (m, 2H), 5.24 (d, *J* = 9.6 Hz, 1H), 5.09 (dt, *J* = 10.4, 5.2 Hz, 1H), 5.03 (s, 1H), 4.73 (s, 1H), 4.67 – 4.61 (m, 1H), 4.62 – 4.56 (m, 1H), 4.51 (q, *J* = 7.5 Hz, 1H), 4.46 – 4.41 (m, 1H), 4.37 – 4.32 (m, 2H), 4.32 – 4.20 (m, 6H), 4.18 – 4.13 (m, 2H), 4.01 – 3.94 (m, 2H), 3.70 (d, *J* = 15.5 Hz, 2H), 3.64 (s, 2H), 3.62 – 3.54 (m, 4H), 3.51 (s, 2H), 3.15 (d, *J* = 10.8 Hz, 1H), 3.10 – 3.05 (m, 2H), 3.02 (d, *J* = 14.1 Hz, 1H), 2.98 (dd, *J* = 14.8, 9.1

Hz, 1H), 2.92 – 2.83 (m, 2H), 2.18 – 2.12 (m, 1H), 2.06 – 2.02 (m, 2H), 1.99 (d,  $J = 8.0$  Hz, 2H), 1.95 – 1.91 (m, 1H), 1.81 (dq,  $J = 13.4, 7.2, 6.7$  Hz, 2H), 1.74 (s, 3H), 1.73 – 1.67 (m, 2H), 1.67 (s, 3H), 1.63 (d,  $J = 6.5$  Hz, 3H), 1.61 – 1.57 (m, 2H), 1.54 – 1.39 (m, 6H), 1.37 – 1.29 (m, 4H), 0.87 (d,  $J = 6.6$  Hz, 3H), 0.82 (d,  $J = 6.5$  Hz, 3H), 0.76 (d,  $J = 6.4$  Hz, 3H), 0.72 (d,  $J = 7.1$  Hz, 3H).  $^{13}\text{C-NMR}$  (176 MHz, DMSO- $d_6$ )  $\delta$  [ppm]: 177.44, 174.22, 172.47, 171.88, 171.85, 171.55, 171.00, 170.77, 170.66, 169.98, 169.74, 163.53, 157.92, 157.75, 157.57, 157.40, 156.57, 155.82, 146.72, 142.90, 138.51, 136.21, 136.02, 133.80, 131.18, 130.15, 129.63, 129.38, 129.02, 128.74, 127.78, 127.30, 126.80, 125.79, 124.53, 123.69, 122.36, 120.85, 120.32, 118.56, 118.20, 116.95, 114.87, 111.21, 109.65, 77.85, 74.05, 73.53, 68.19, 62.79, 61.74, 59.71, 56.55, 55.41, 54.97, 54.48, 53.28, 51.67, 50.49, 50.13, 48.85, 47.21, 46.97, 41.95, 36.94, 35.10, 31.26, 29.70, 29.56, 29.22, 29.08, 28.81, 28.71, 28.68, 28.57, 28.55, 28.10, 27.74, 26.59, 26.55, 26.01, 25.53, 25.09, 24.99, 24.59, 24.52, 24.10, 23.18, 22.08, 21.10, 20.78, 20.09, 17.64, 16.41, 13.95, 11.08. **LRMS** (ESI-Quad) [m/z]: 909.6 [M+H] $^+$ , **HRMS** (ESI-IT) [m/z]: 908.97884, calculated 908.98031 for  $\text{C}_{23}\text{H}_{34}\text{N}_5\text{O}_6$  [M+H] $^+$ , err [ppm] - 1.617.

#### L-Orn-LHRH-Val-Cit-pABA-16R-Aminoratjadone

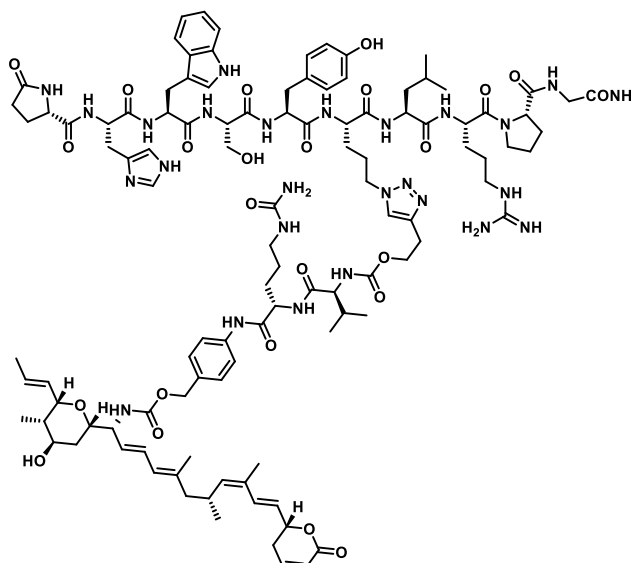

Chemical Formula:  $\text{C}_{110}\text{H}_{152}\text{N}_{26}\text{O}_{24}$   
Molecular Weight: 2222.58

L-Orn-LHRH-Val-Cit-pABA-16R-Aminoratjadone

To a solution of 2.97 mg (1.99  $\mu\text{mol}$ , 1.0 equiv) **L-Orn-N<sub>3</sub>-LHRH** and 2.0 mg (2.09  $\mu\text{mol}$ , 1.05 equiv) Homopropargyl-O(CO)HN-Val-Cit-PABO(CO)-16R-Aminoratjadone**26** in a mixture of DMSO:pH =7 phosphate buffer:tBuOH/2:2:1 (80  $\mu\text{L}$ ) were added 0.443  $\mu\text{g}$  (0.835  $\mu\text{mol}$ , 0.25 eq, 10  $\mu\text{L}$  from a stock solution in DMSO) TBTA, 36  $\mu\text{g}$  (0.199  $\mu\text{mol}$ , 0.1 eq, 10  $\mu\text{L}$  from a stock solution in  $\text{H}_2\text{O}$ ) CuOAc, 1.31 mg (5.97  $\mu\text{mol}$ , 3.0 equiv) zinc acetate and 394  $\mu\text{g}$  (1.99  $\mu\text{mol}$ , 1.0 eq, 10  $\mu\text{L}$  from a stock solution in  $\text{H}_2\text{O}$ )



sodium ascorbate and the mixture was stirred under light exclusion for 2 h at 23°C until complete conversion was monitored by LCMS. The reaction mixture was diluted with 100  $\mu$ L of MeOH, filtered through a Whatman filter (45  $\mu$ m) and directly purified by RP prep HPLC (Phenomenex Gemini C18 RP-column 00G-4435-PO-AX, 5  $\mu$ m, 110 A, 250 $\times$ 21.20 mm, Flow: 9 mL/min, ACN:H<sub>2</sub>O + 0.1% TFA/ 10:90  $\rightarrow$  95:5 in 45 min) yielding after lyophilization 2.2 mg (0.898  $\mu$ mol, 45%) **L-Orn-LHRH-Val-Cit-pABA-16R-Aminoratjadone** TFA salt as a white, amorph solid.

**L-Orn-LHRH-Val-Cit-pABA-16R-Aminoratjadone:** <sup>1</sup>H-NMR (700 MHz, DMSO-*d*<sub>6</sub>)  $\delta$  [ppm]: 13.98 (s, 2H), 10.79 (d, *J* = 2.3 Hz, 1H), 10.03 (s, 1H), 9.20 (s, 1H), 9.03 (s, 2H), 8.31 (s, 1H), 8.24 (t, *J* = 5.9 Hz, 1H), 8.21 (d, *J* = 7.2 Hz, 1H), 8.11 (d, *J* = 7.3 Hz, 3H), 8.07 (t, *J* = 7.4 Hz, 2H), 8.00 (d, *J* = 7.7 Hz, 1H), 7.87 (s, 1H), 7.69 (s, 1H), 7.61 (d, *J* = 8.0 Hz, 1H), 7.57 (d, *J* = 8.2 Hz, 2H), 7.47 (t, *J* = 5.7 Hz, 1H), 7.30 (dd, *J* = 8.5, 4.2 Hz, 2H), 7.27 (d, *J* = 8.2 Hz, 2H), 7.19 (s, 1H), 7.15 – 7.10 (m, 3H), 7.08 (s, 1H), 7.06 – 7.00 (m, 4H), 6.91 (t, *J* = 7.5 Hz, 1H), 6.75 (d, *J* = 15.6 Hz, 2H), 6.64 (d, *J* = 8.0 Hz, 1H), 6.35 – 6.26 (m, 1H), 6.02 – 5.97 (m, 1H), 5.97 (ddd, *J* = 9.7, 2.5, 1.2 Hz, 1H), 5.77 (d, *J* = 11.5 Hz, 2H), 5.75 – 5.72 (m, 2H), 5.57 (dt, *J* = 15.3, 7.9 Hz, 1H), 5.43 (s, 1H), 5.39 – 5.32 (m, 1H), 5.23 (d, *J* = 9.6 Hz, 1H), 5.09 (dt, *J* = 10.8, 5.3 Hz, 1H), 5.05 (s, 1H), 4.99 (d, *J* = 12.4 Hz, 1H), 4.93 (d, *J* = 12.5 Hz, 1H), 4.73 (s, 1H), 4.63 (dd, *J* = 12.8, 7.0 Hz, 1H), 4.60 – 4.54 (m, 2H), 4.53 – 4.47 (m, 2H), 4.46 – 4.38 (m, 5H), 4.34 (q, *J* = 6.1 Hz, 2H), 4.31 – 4.20 (m, 5H), 4.20 – 4.13 (m, 2H), 4.06 – 4.00 (m, 1H), 3.97 (dd, *J* = 8.8, 4.2 Hz, 1H), 3.92 (t, *J* = 7.9 Hz, 1H), 3.71 (d, *J* = 6.9 Hz, 2H), 3.68 – 3.54 (m, 5H), 3.51 (s, 3H), 3.05 – 2.83 (m, 8H), 2.73 (q, *J* = 8.4 Hz, 1H), 2.44 (ddt, *J* = 18.5, 10.6, 2.7 Hz, 2H), 2.19 – 1.92 (m, 9H), 1.80 (p, *J* = 6.8, 6.2 Hz, 2H), 1.74 (d, *J* = 1.3 Hz, 3H), 1.72 – 1.68 (m, 2H), 1.67 (s, 3H), 1.63 (dt, *J* = 6.5, 1.5 Hz, 3H), 1.60 (d, *J* = 8.0 Hz, 3H), 1.54 – 1.39 (m, 1H), 1.38 – 1.30 (m, 1H), 0.87 (d, *J* = 7.3 Hz, 3H), 0.86 (d, *J* = 7.2 Hz, 4H), 0.83 – 0.82 (m, 3H), 0.81 (d, *J* = 2.4 Hz, 3H), 0.76 (d, *J* = 6.4 Hz, 3H), 0.73 (d, *J* = 7.2 Hz, 3H). <sup>13</sup>C-NMR (176 MHz, DMSO-*d*<sub>6</sub>)  $\delta$  [ppm]: 177.44, 172.44, 171.89, 171.85, 171.57, 171.21, 171.02, 170.78, 170.69, 170.54, 170.02, 169.77, 163.53, 158.90, 158.03, 157.85, 157.68, 157.51, 156.65, 156.04, 155.82, 155.69, 146.71, 142.94, 138.50, 136.18, 136.02, 132.05, 131.16, 130.14, 129.35, 129.03, 128.98, 128.32, 127.49, 127.30, 127.22, 126.80, 125.79, 124.54, 123.70, 122.47, 120.84, 120.33, 118.86, 118.53, 118.20, 116.49, 114.88, 111.21, 109.69, 77.83, 74.03, 73.55, 68.18, 64.91, 62.99, 61.70, 59.83, 59.74, 56.53, 55.41, 55.00, 54.52, 53.33, 53.04, 51.71, 50.51, 50.14, 48.86, 47.22, 46.98, 41.96, 40.75, 40.60, 38.65, 36.91, 30.47, 29.62, 29.58, 29.45, 29.22, 29.09, 29.05, 28.07, 27.69, 26.76, 26.02, 25.46, 25.01, 24.59, 24.53, 24.10, 23.17, 21.11, 21.05, 20.80, 20.10, 20.04, 19.17, 18.13, 17.65, 16.43, 11.08. **LRMS** (ESI-Quad) [m/z]: 1112.3 [M+2H]<sup>2+</sup>, **HRMS** (ESI-IT) [m/z]: 112.0826, calculated 1112.0827 for C<sub>110</sub>H<sub>154</sub>N<sub>26</sub>O<sub>24</sub> [M+2H]<sup>2+</sup>, err [ppm] -0.089.

**D-Orn-LHRH-Val-Cit-pABA-16R-Aminoratjadone**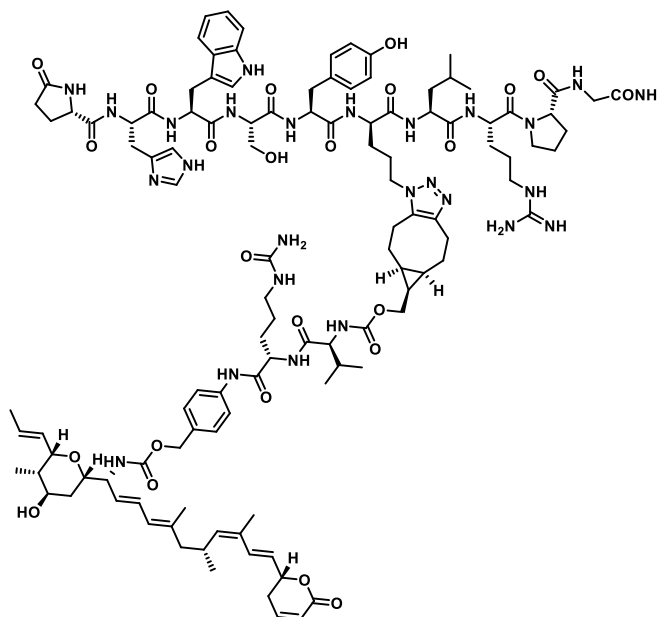

Chemical Formula: C<sub>116</sub>H<sub>160</sub>N<sub>26</sub>O<sub>24</sub>  
Molecular Weight: 2302,71

**D-Orn-LHRH-Val-Cit-pABA-16R-Aminoratjadone**

To a solution of 4 mg (2.678  $\mu$ mol, 1.0 equiv) **D-Orn-N<sub>3</sub>-LHRH** in 54  $\mu$ L dry DMSO was added a solution of 3.0 mg (2.946  $\mu$ mol, 1.1 equiv) BCN-O(CO)HN-Val-Cit-pABO(CO)-16R-Aminoratjadone**25** in 54  $\mu$ L dry DMSO and the mixture was stirred for 2 h at 23°C under light exclusion until complete conversion was monitored by LCMS. The reaction mixture was diluted with 100  $\mu$ L of MeOH, filtered through a Whatman® filter (45  $\mu$ m) and directly purified by RP prep HPLC (Phenomenex Gemini C18 RP-column 00G-4435-PO-AX, 5  $\mu$ m, 110 A, 250×21.20 mm, Flow: 9 mL/min, ACN:H<sub>2</sub>O + 0.1% TFA/ 10:90 → 95:5 in 45 min) yielding after lyophilization 3.7 mg (1.6  $\mu$ mol, 60%) of **D-Orn-LHRH-Val-Cit-pABA-16R-Aminoratjadone** as a mixture of diastereomers of TFA salts as a white, amorph solid.

**D-Orn-LHRH-Val-Cit-pABA-16R-Aminoratjadone:** <sup>1</sup>H-NMR (700 MHz, DMSO-*d*<sub>6</sub>)  $\delta$  [ppm]: 14.05 (s, 2H), 10.90 – 10.35 (m, 1H), 10.03 (d, *J* = 6.1 Hz, 1H), 9.18 (s, 1H), 8.92 (s, 1H), 8.29 (d, *J* = 7.5 Hz, 1H), 8.25 – 8.18 (m, 1H), 8.13 (d, *J* = 8.4 Hz, 1H), 8.04 (td, *J* = 9.3, 5.1 Hz, 2H), 7.98 (d, *J* = 9.3 Hz, 3H), 7.68 (s, 1H), 7.61 (d, *J* = 8.0 Hz, 1H), 7.57 (dd, *J* = 8.8, 3.0 Hz, 2H), 7.46 (t, *J* = 5.7 Hz, 1H), 7.33 – 7.24 (m, 5H), 7.14 (s, 1H), 7.12 (d, *J* = 2.3 Hz, 1H), 7.10 (s, 1H), 7.08 (s, 1H), 7.06 – 7.01 (m, 4H), 6.91 (t, *J* = 7.5 Hz, 1H), 6.75 (d, *J* = 15.6 Hz, 1H), 6.64 (d, *J* = 8.1 Hz, 2H), 6.31 (dd, *J* = 15.3, 10.9 Hz, 1H), 5.99 (s, 1H), 5.97 (dd, *J* = 10.0, 2.5 Hz, 1H), 5.77 (d, *J* = 11.4 Hz, 1H), 5.76 – 5.72 (m, 1H), 5.57 (dt, *J* = 15.2, 7.7 Hz, 2H), 5.42 (s, 1H), 5.38 – 5.28 (m, 1H), 5.23 (d, *J* = 9.7 Hz, 1H), 5.09 (dq, *J* = 10.7, 5.3, 4.8 Hz, 1H), 5.04 (s, 1H), 4.99 (d, *J* = 12.5 Hz, 1H), 4.93 (d, *J* = 12.6 Hz, 1H), 4.64 (td, *J* = 8.1, 4.5 Hz, 1H), 4.60 (td, *J* = 8.3, 5.3 Hz, 1H), 4.50 (q, *J* = 7.5 Hz, 1H), 4.46 – 4.38 (m,

2H), 4.36 – 4.23 (m, 5H), 4.15 (s, 2H), 4.08 (d,  $J = 8.4$  Hz, 1H), 4.03 (p,  $J = 7.4$  Hz, 2H), 3.97 (dd,  $J = 8.7, 4.2$  Hz, 1H), 3.90 (q,  $J = 6.9$  Hz, 1H), 3.73 – 3.55 (m, 8H), 3.51 (dd,  $J = 10.5, 6.1$  Hz, 4H), 3.16 – 3.12 (m, 1H), 3.12 – 3.01 (m, 4H), 3.00 – 2.81 (m, 7H), 2.76 – 2.68 (m, 2H), 2.66 – 2.59 (m, 1H), 2.53 (dd,  $J = 13.7, 5.0$  Hz, 1H), 2.44 (ddt,  $J = 18.5, 10.5, 2.7$  Hz, 2H), 2.17 – 2.00 (m, 6H), 1.99 (d,  $J = 7.2$  Hz, 2H), 1.97 – 1.90 (m, 2H), 1.80 (dq,  $J = 16.6, 5.9$  Hz, 2H), 1.74 (s, 3H), 1.70 (dq,  $J = 8.7, 4.2, 3.6$  Hz, 2H), 1.67 (s, 3H), 1.63 (d,  $J = 6.4$  Hz, 3H), 1.60 – 1.39 (m, 16H), 1.39 – 1.30 (m, 2H), 1.11 (q,  $J = 8.4$  Hz, 1H), 0.87 (t,  $J = 5.7$  Hz, 7H), 0.83 (d,  $J = 6.5$  Hz, 6H), 0.77 (d,  $J = 6.4$  Hz, 3H), 0.73 (d,  $J = 7.1$  Hz, 3H).  **$^{13}\text{C-NMR}$**  (176 MHz, DMSO- $d_6$ )  $\delta$  [ppm]: 177.44, 172.48, 171.85, 171.57, 171.26, 171.01, 170.82, 170.71, 170.53, 170.01, 169.75, 169.58, 163.53, 158.89, 158.21, 158.03, 157.85, 157.67, 156.64, 156.35, 155.84, 155.69, 143.33, 143.26, 138.50, 138.46, 136.18, 136.03, 133.78, 132.66, 132.56, 132.06, 131.16, 130.12, 129.35, 129.12, 129.03, 128.98, 128.32, 127.52, 127.30, 127.22, 126.80, 125.79, 124.54, 123.70, 120.84, 120.33, 118.86, 118.56, 118.20, 117.78, 116.94, 116.08, 114.87, 111.21, 109.65, 77.83, 74.03, 73.55, 68.19, 64.90, 61.76, 61.67, 59.95, 59.91, 59.72, 56.53, 55.41, 54.99, 54.52, 53.27, 53.00, 51.83, 51.26, 50.50, 50.15, 48.59, 47.22, 46.97, 46.82, 41.96, 40.81, 40.61, 38.65, 36.92, 30.45, 30.40, 29.76, 29.72, 29.58, 29.50, 29.22, 29.09, 29.05, 28.07, 27.75, 27.08, 26.74, 25.72, 25.42, 25.35, 24.97, 24.59, 24.52, 24.11, 23.18, 22.25, 22.17, 21.82, 21.67, 21.22, 21.17, 21.05, 20.80, 20.10, 20.04, 19.31, 19.20, 19.05, 18.63, 18.43, 18.12, 17.65, 17.32, 17.20, 16.43, 11.08. **HRMS** (ESI-IT) [m/z]: 2302.2203, calculated 2302.2171 for  $\text{C}_{116}\text{H}_{161}\text{N}_{26}\text{O}_{24}$  [M+H] $^+$ , err [ppm] 1.389.

**D-Orn-Gose-Val-Cit-pABA-16R-Aminoratjadone**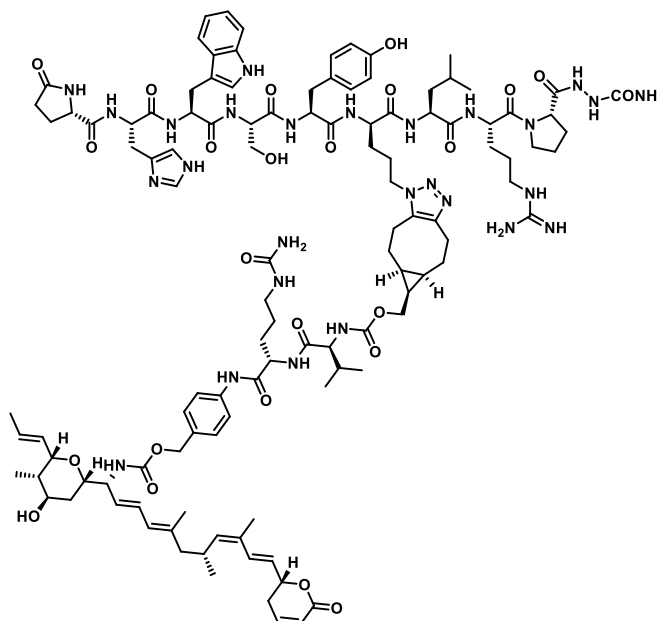

Chemical Formula: C<sub>115</sub>H<sub>159</sub>N<sub>27</sub>O<sub>24</sub>  
Molecular Weight: 2303,70

**D-Orn-Gose-Val-Cit-pABA-16R-Aminoratjadone**

To a solution of 4 mg (2.487  $\mu$ mol, 1.0 equiv) **D-Orn-N<sub>3</sub>-Gose** in 25  $\mu$ L dry DMSO was added a solution of 2.84 mg (2.735  $\mu$ mol, 1.1 equiv) BCN-O(CO)HN-Val-Cit-pABO(CO)-16R-Aminoratjadone**25** in 25  $\mu$ L dry DMSO and the mixture was stirred for 16 h at 23°C under light exclusion until complete conversion was monitored by LCMS. The reaction mixture was diluted with 100  $\mu$ L of MeOH, filtered through a Whatman® filter (45  $\mu$ m) and directly purified by RP prep HPLC (Phenomenex Gemini C18 RP-column 00G-4435-PO-AX, 5  $\mu$ m, 110 A, 250×21.20 mm, Flow: 9 mL/min, ACN:H<sub>2</sub>O + 0.1% TFA/ 10:90 → 95:5 in 45 min) yielding after lyophilization 3.9 mg (1.69  $\mu$ mol, 68%) of **D-Orn-Goserellin-Val-Cit-pABA-16R-Aminoratjadone** as a mixture of diastereomers of TFA salts as a white, amorph solid.

**D-Orn-Gose-Val-Cit-pABA-16R-Aminoratjadone:** <sup>1</sup>H-NMR (700 MHz, DMSO-*d*<sub>6</sub>)  $\delta$  [ppm]: 14.03 (s, 2H), 10.78 (d, *J* = 2.5 Hz, 1H), 10.03 (d, *J* = 7.0 Hz, 1H), 9.78 (s, 1H), 9.18 (s, 1H), 8.92 (s, 1H), 8.29 (d, *J* = 7.6 Hz, 1H), 8.24 (d, *J* = 7.0 Hz, 1H), 8.13 (d, *J* = 8.7 Hz, 2H), 8.05 (p, *J* = 8.0 Hz, 2H), 7.98 (t, *J* = 9.1 Hz, 1H), 7.79 (s, 1H), 7.68 (s, 1H), 7.61 (d, *J* = 8.0 Hz, 1H), 7.59 – 7.55 (m, 2H), 7.44 (t, *J* = 5.7 Hz, 1H), 7.29 (dd, *J* = 23.2, 7.7 Hz, 5H), 7.14 – 7.07 (m, 2H), 7.06 – 7.00 (m, 4H), 6.90 (t, *J* = 7.5 Hz, 1H), 6.75 (d, *J* = 15.6 Hz, 1H), 6.64 (d, *J* = 8.2 Hz, 2H), 6.31 (dd, *J* = 15.2, 10.9 Hz, 1H), 6.03 – 5.94 (m, 2H), 5.90 (s, 2H), 5.77 (d, *J* = 11.6 Hz, 1H), 5.76 – 5.72 (m, 1H), 5.57 (dt, *J* = 15.1, 7.7 Hz, 2H), 5.49 – 5.38 (m, 2H), 5.38 – 5.30 (m, 1H), 5.23 (d, *J* = 9.7 Hz, 1H), 5.09 (dq, *J* = 10.8, 5.3, 4.7 Hz, 1H), 5.05 (d, *J* = 6.9 Hz, 0H), 4.99 (d, *J* = 12.2 Hz, 1H), 4.93 (d, *J* = 12.8 Hz, 1H), 4.64 (q, *J* = 7.8 Hz, 1H), 4.60 (td, *J* = 8.3, 5.3 Hz, 1H), 4.53 – 4.46 (m, 1H), 4.42 (q, *J* = 7.4, 6.8 Hz, 2H),

4.37 – 4.26 (m, 3H), 4.24 (d,  $J = 4.3$  Hz, 1H), 4.17 (d,  $J = 20.7$  Hz, 3H), 4.09 (d,  $J = 19.4$  Hz, 1H), 4.05 – 3.99 (m, 2H), 3.97 (dd,  $J = 8.8, 4.2$  Hz, 1H), 3.90 (q,  $J = 6.9$  Hz, 1H), 3.77 – 3.70 (m, 3H), 3.66 (ddd,  $J = 11.9, 5.8, 2.5$  Hz, 2H), 3.58 (s, 2H), 3.54 – 3.44 (m, 3H), 3.18 – 3.12 (m, 1H), 3.11 – 2.82 (m, 11H), 2.77 – 2.67 (m, 2H), 2.67 – 2.57 (m, 1H), 2.55 – 2.52 (m, 1H), 2.44 (ddt,  $J = 18.5, 10.6, 2.7$  Hz, 1H), 2.20 – 2.01 (m, 6H), 1.99 (d,  $J = 7.1$  Hz, 2H), 1.96 (d,  $J = 13.3$  Hz, 2H), 1.80 (s, 2H), 1.74 (s, 3H), 1.70 (dt,  $J = 8.3, 4.4$  Hz, 2H), 1.67 (s, 3H), 1.65 – 1.62 (m, 3H), 1.60 – 1.40 (m, 16H), 1.38 – 1.30 (m, 3H), 1.10 (p,  $J = 7.6, 6.9$  Hz, 2H), 0.93 – 0.85 (m, 8H), 0.83 (d,  $J = 6.5$  Hz, 6H), 0.77 (d,  $J = 6.3$  Hz, 3H), 0.73 (d,  $J = 7.1$  Hz, 3H).  **$^{13}\text{C-NMR}$**  (176 MHz, DMSO- $d_6$ )  $\delta$  [ppm]: 177.43, 172.47, 171.89, 171.55, 171.46, 171.25, 170.79, 170.68, 170.51, 170.07, 169.74, 169.56, 163.52, 158.88, 158.18, 158.00, 157.81, 157.63, 156.61, 156.33, 155.83, 155.69, 146.70, 143.32, 143.25, 138.49, 138.44, 136.17, 136.02, 135.30, 133.77, 132.55, 132.05, 131.15, 130.12, 129.34, 129.10, 129.02, 128.97, 128.31, 127.50, 127.30, 127.21, 126.79, 125.78, 124.53, 123.69, 120.84, 120.32, 118.85, 118.55, 118.19, 117.64, 116.93, 114.86, 111.20, 109.64, 77.82, 74.02, 73.54, 68.18, 64.89, 61.76, 61.65, 59.89, 58.33, 56.52, 55.41, 54.98, 54.51, 53.26, 52.99, 51.80, 51.25, 50.46, 50.12, 47.21, 46.99, 46.82, 40.81, 40.60, 38.65, 36.93, 33.65, 31.27, 31.19, 30.45, 30.40, 29.58, 29.49, 29.21, 29.08, 29.00, 28.92, 28.72, 28.68, 28.08, 27.75, 27.07, 26.74, 25.73, 25.71, 25.41, 25.35, 24.97, 24.69, 24.48, 24.11, 23.18, 22.25, 22.21, 22.18, 22.08, 21.82, 21.67, 21.17, 21.15, 21.04, 20.79, 20.09, 20.02, 19.31, 19.20, 19.05, 18.62, 18.13, 17.64, 17.33, 17.19, 16.42, 15.72, 13.95, 11.07. **HRMS** (ESI-IT) [m/z]: 768.4090, calculated 768.4090 for  $\text{C}_{115}\text{H}_{162}\text{N}_{27}\text{O}_{24}$  [M+3H] $^{3+}$ , err [ppm] 0.0.

## Biological evaluation of the compounds

### Cell proliferation assay

The corresponding cells were cultivated at 37 °C and 10 % CO<sub>2</sub> in the medium given in table 1. 60 µL of serial dilutions of the test compound were given to 120 µL of suspended cells (50.000/mL) in wells of 96-well plates. After 5 days of incubation growth inhibition (IC<sub>50</sub>) was determined using an MTT assay.<sup>9</sup>

Table S1: Medium conditions for different cell types.

| Cell type                | Medium                            | Additives                                                              |
|--------------------------|-----------------------------------|------------------------------------------------------------------------|
| L-929 (DSMZ ACC 2)       | DME medium (high glucose) (Gibco) | 10% fetal calf serum (Gibco)                                           |
| SKOV-3 DSMZ ATCC HTB 77) | Mc Coys-Medium (Gibco)            | 10% fetal calf serum (Gibco)                                           |
| MCF-7 (DSMZ ACC 115)     | RPMI-Medium (Gibco)               | 10% fetal calf serum (Gibco), 1% MEM NEAA, 0,25% Human Insulin (Gibco) |
| A549 (DSMZ ACC 107)      | DME medium (high glucose) (Gibco) | 10% fetal calf serum (Gibco)                                           |
| KB 3.1 (DSMZ ACC 158)    | DME medium (high glucose) (Gibco) | 10% fetal calf serum (Gibco)                                           |

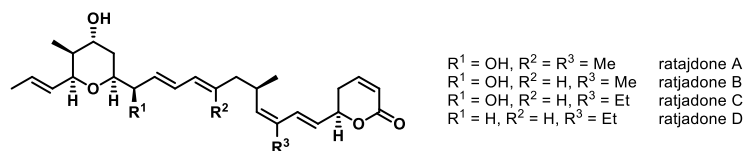

| Ratjadone | Compound | Antiproliferative activity IC <sub>50</sub> [nM] |       |       |      |       |
|-----------|----------|--------------------------------------------------|-------|-------|------|-------|
|           |          | KB-3.1                                           | KB-V1 | K-562 | PC-3 | L-929 |
| A         | <b>1</b> | 0.30                                             | 0.15  | 0.30  | 0.08 | 0.15  |
| B         | <b>2</b> | 1                                                | 0.15  | 0.50  | 0.15 | 0.35  |
| C         | <b>3</b> | 0.35                                             | 0.08  | 0.15  | 0.08 | 0.2   |
| D         | <b>4</b> | 2                                                | 0.30  | 0.50  | 0.40 | 1     |

KB-3.1: human cervix carcinoma, KB-V1: multi-drug-resistant human cervix carcinoma, K-562: human chronic myelogenous leukemia cell, PC-3: human prostate carcinoma, L-929: murine fibroblast

Figure S8: Structures of Ratjadone A-D and their antiproliferative activity (IC<sub>50</sub> values in nM). Data published by Köster *et al.*<sup>10</sup>

Table S2: Antiproliferative activities of novel Ratjadone derivatives.

| Compound                                                                                                                                                | IC <sub>50</sub> [nM] |       |         |       |         |
|---------------------------------------------------------------------------------------------------------------------------------------------------------|-----------------------|-------|---------|-------|---------|
|                                                                                                                                                         | KB-3.1                | A-549 | SK-OV-3 | MCF-7 | L-929   |
| Ratjadone <b>A 1</b>                                                                                                                                    | 0.46                  | 0.15  | 0.24    | 0.11  | 0.68    |
| 16-Oxoratjadone <b>13</b>                                                                                                                               | 2.57                  | 1.76  | 0.24    | 0.22  | 12.56   |
| 19-Oxoratjadone <b>14</b>                                                                                                                               | 0.36                  | 0.10  | 0.16    | 0.48  | 1.15    |
| 16,19-Dioxoratjadone <b>15</b>                                                                                                                          | 3.98                  | 9.72  | 1.59    | 2.87  | 24.30   |
| 16 <i>R</i> -Aminoratjadone <b>16</b>                                                                                                                   | 0.39                  | 0.31  | 0.61    | 0.26  | 4.61    |
| 16 <i>S</i> -Aminoratjadone <b>17</b>                                                                                                                   | 1.59                  | 1.31  | 0.81    | 0.36  | 28.38   |
| Compound <b>18</b>                                                                                                                                      | 115.6                 |       |         |       | 3307.38 |
| Compound <b>19</b>                                                                                                                                      | 165.4                 |       |         |       | 1322.95 |
| Compound <b>20</b>                                                                                                                                      | 1.05                  | 0.58  | 0.44    | 0.40  |         |
| Compound <b>21</b>                                                                                                                                      | 0.47                  | 1.25  | 0.45    | 0.27  | 4.50    |
| Compound <b>22</b>                                                                                                                                      | 1.23                  | 2.45  | 1.20    | 0.62  |         |
| BCN-O(CO)HN-Val-Cit- <i>p</i> ABO(CO)-16 <i>R</i> -                                                                                                     | 25.06                 | 39.52 | 34.70   | 20.24 |         |
| Homopropargyl-O(CO)HN-Val-Cit- <i>p</i> ABO(CO)-16 <i>R</i> -Aminoratjadone <b>26</b>                                                                   | 9.20                  | 25.07 | 13.58   | 12.53 |         |
| 2-PySS(CH <sub>2</sub> ) <sub>2</sub> (CO)-16 <i>R</i> -Aminoratjadone <b>31</b>                                                                        | 8.80                  | 30.6  | 24.6    | 26.0  |         |
| HCC(CH <sub>2</sub> ) <sub>2</sub> (CO)-NH-(CH <sub>2</sub> ) <sub>2</sub> SS(CH <sub>2</sub> ) <sub>2</sub> (CO)-16 <i>R</i> -Aminoratjadone <b>29</b> | 1.86                  | 0.86  | 1.09    | 0.17  |         |
| 19-Aminoratjadone <b>33</b>                                                                                                                             | 6.67                  | 4.39  | 1.40    | 2.10  |         |
| <i>N</i> -Propargyl-19-Aminoratjadone <b>35</b>                                                                                                         | 1.23                  | 1.12  | 2.63    | 1.31  |         |

Table S3: Antiproliferative activities of Carrier molecules.

| Compound                   | IC <sub>50</sub> [nM] |                       |                       |                       |
|----------------------------|-----------------------|-----------------------|-----------------------|-----------------------|
|                            | KB-3.1                | A-549                 | SK-OV-3               | MCF-7                 |
| FA-N <sub>3</sub> -5       | >8.64x10 <sup>4</sup> | >8.64x10 <sup>4</sup> |                       |                       |
| FA-N <sub>3</sub> -6       | >1.18x10 <sup>5</sup> | >1.18x10 <sup>5</sup> |                       |                       |
| FA-N <sub>3</sub> -9       | >1.40x10 <sup>5</sup> | >1.40x10 <sup>5</sup> |                       |                       |
| LHRH                       | >4.05x10 <sup>5</sup> | >4.05x10 <sup>5</sup> | >4.05x10 <sup>5</sup> | >4.05x10 <sup>5</sup> |
| L-Orn-N <sub>3</sub> -LHRH | >7.27x10 <sup>5</sup> | >7.27x10 <sup>5</sup> | >7.27x10 <sup>5</sup> | >7.27x10 <sup>5</sup> |
| D-Orn-N <sub>3</sub> -LHRH | 1106.3                | 318.4                 | 189.7                 | 47.4                  |
| D-Orn-N <sub>3</sub> -Gose | >6.63x10 <sup>5</sup> | >6.63x10 <sup>5</sup> | >6.63x10 <sup>5</sup> | >6.63x10 <sup>5</sup> |

Table S4: Antiproliferative activity of novel Gonadoliberin-Ratjadone Conjugates

| Compound                                   | IC <sub>50</sub> [nM] |
|--------------------------------------------|-----------------------|
|                                            | A-549                 |
| L-Orn-LHRH-16R-Aminoratjadone              | 1600                  |
| L-Orn-LHRH-Val-Cit-pABA-16R-Aminoratjadone | 1200                  |
| D-Orn-LHRH-Val-Cit-pABA-16R-Aminoratjadone | 23.0                  |
| D-Orn-Gose-Val-Cit-pABA-16R-Aminoratjadone | 12.8                  |

### Cell proliferation assay under folate free conditions

KB 3.1 (DSMZ ACC 158) cells were cultivated at 37 °C and 10 % CO<sub>2</sub> in RPMI-medium without folic acid (Gibco) with 10% fetal calf serum (Gibco). 120 µL of suspended cells (100.000/mL) were seeded in in wells of 96-well plates and after 24 h at 37 °C and 10 % CO<sub>2</sub> the medium was removed, the cells were washed with PBS and RPMI-medium without folic acid (Gibco) + 10% dialyzed fetal calf serum (Sigma) were added to the cells, before after additional 24 h at 37°C and 10 % CO<sub>2</sub> 60 µL of serial dilutions of the test compound were given to cells. After 1, 2 and 5 days of incubation growth inhibition (IC<sub>50</sub>) was determined using an MTT assay.<sup>9</sup>



Table S5: Antiproliferative activity of novel Folate-Ratjadone Conjugates.

| Compound                                                      | IC <sub>50</sub> [nM]<br>KB 3.1 |
|---------------------------------------------------------------|---------------------------------|
| FA-1-Val-Cit- <i>p</i> ABA-16R-Aminoratjadone                 | 168.9                           |
| FA-2-Val-Cit- <i>p</i> ABA-16R-Aminoratjadone                 | 336.3                           |
| FA-3-Val-Cit- <i>p</i> ABA-16R-16R-Aminoratjadone             | 209.8                           |
| FA-4-(Val-Cit- <i>p</i> ABA-16R-Aminoratjadone) <sub>2</sub>  | 147.6                           |
| FA-5-Val-Cit- <i>p</i> ABA-16R-Aminoratjadone                 | 237.0                           |
| FA-6-Val-Cit- <i>p</i> ABA-16R-Aminoratjadone                 | 223.3                           |
| FA-7-Val-Cit- <i>p</i> ABA-16R-Aminoratjadone                 | 34.3                            |
| FA-8-Val-Cit- <i>p</i> ABA-16R-Aminoratjadone                 | 39.9                            |
| FA-9-Val-Cit- <i>p</i> ABA-16R-Aminoratjadone                 | 50.9                            |
| FA-10-Val-Cit- <i>p</i> ABA-16R-Aminoratjadone                | 35.3                            |
| FA-11-(Val-Cit- <i>p</i> ABA-16R-Aminoratjadone) <sub>3</sub> | 45.0                            |
| FA-3-L-16R-Aminoratjadone                                     | 29.8                            |
| FA-3-L-19-Aminoratjadone                                      | 48.3                            |
| FA-3b-L-16R-Aminoratjadone                                    | 94.0                            |
| FA-5-L-16R-Aminoratjadone                                     | 50.3                            |
| FA-6-L-16R-Aminoratjadone                                     | 150.5                           |
| FA-7-L-16R-Aminoratjadone                                     | 190.1                           |
| FA-8-L-16R-Aminoratjadone                                     | 129.1                           |
| FA-9-L-16R-Aminoratjadone                                     | 47.6                            |
| FA-10-L-16R-Aminoratjadone                                    | 707.7                           |
| FA-SS-16R-Aminoratjadone                                      | 294.6                           |

## Monitoring export inhibitory activity

Export inhibitory ability of compounds was evaluated with the translocation biosensor system. This cellular assay depends on a recombinantly expressed fusion protein consisting of a nuclear localization signal (SV40-NLS), glutathione S-transferase (GST), green fluorescent protein (GFP) and a nuclear export signal (HIV1-RevNES). Due to the two transport signals (NLS/NES), the biosensor is permanently shuttling between nucleus and cytoplasm but resides prominently in the cytoplasm due to a comparatively stronger NES. Export inhibiting compound induce a nuclear accumulation of the GFP-signal<sup>11,12</sup> Cell lines were maintained as recommended by the American Type Culture Collection in DMEM containing 5% glutamine (Thermo Fisher Scientific, Waltham, USA) supplemented with 10% FBS (Thermo Fisher Scientific, Waltham, USA). For quantifying the nuclear export inhibitory effect, HeLa cells stably expressing a fluorescent translocation biosensor (HeLa<sub>RevBio</sub>)<sup>13</sup> were seeded into black 96well µclear plates (Greiner, Germany). The next day compounds were added covering an appropriate concentration range. After 1h of incubation, cells were fixed in 4% PFA for 10 min and permeabilized with 0.1% Triton X 100 in PBS for 5min. After washing with PBS nuclei were labeled with Hoechst H33342 (30min 10µg/ml). The intracellular distribution of the biosensor-dependent GFP signal was quantitatively evaluated with the high content imaging system ImageXpress MicroXLS (Molecular Devices, Sunnyvale, USA). By using the translocation enhanced application module (Molecular Devices, Sunnyvale, USA) the GFP-intensity was quantified in the cytoplasm and nuclear region. As final readout the difference of Mean Inner and Mean Outer Intensity was calculated. IC<sub>50</sub>s of nuclear export inhibition were calculated using Sigma Plot with four parameter logistics curve regression (Systat Software GmbH, Erkrath, Germany). For confocal microscopy cells were seeded at a density of 0.2\*10<sup>5</sup> cells/well into 8 well microscopy chambers (Ibidi GmbH, Martinsried, Germany). The following day compounds were added at 125nM final concentration. After 1h the cells were imaged on an ECLIPSE Ti (Nikon) equipped with UltraVIEW VoX spinning disc (Perkin Elmer, Waltham, US), ORCA-R2 camera (Hamamatsu Photonics, Japan) and Volocity software 6.1.1 (Perkin Elmer, Waltham, US).

Table S6: CRM1 Inhibitory activities of novel Ratjadone derivatives

| Compound                                                                         | IC <sub>50</sub> [nM]<br>CRM1 |
|----------------------------------------------------------------------------------|-------------------------------|
| Ratjadone A <b>1</b>                                                             | 1.2                           |
| 16-Oxoratjadone <b>13</b>                                                        | 52.5                          |
| 19-Oxoratjadone <b>14</b>                                                        | 13.3                          |
| 16,19-Dioxoratjadone <b>15</b>                                                   | 17.5                          |
| 16 <i>R</i> -Aminoratjadone <b>16</b>                                            | 2.7                           |
| 16 <i>R</i> -Aminoratjadone <b>17</b>                                            | 2.8                           |
| 19-Aminoratjadone <b>33</b>                                                      | 70.0                          |
| N-Propargyl-19-aminoratjadone <b>35</b>                                          | 18.3                          |
| Compound <b>20</b>                                                               | 23.2                          |
| 2-PySS(CH <sub>2</sub> ) <sub>2</sub> (CO)-16 <i>R</i> -Aminoratjadone <b>31</b> | 44.1                          |
| Compound <b>21</b>                                                               | 46.1                          |
| Compound <b>22</b>                                                               | 12.0                          |
| BCN-O(CO)HN-Val-Cit- <i>p</i> ABO(CO)-16 <i>R</i> -Aminoratjadone <b>25</b>      | 346                           |
| <b>L-Orn-LHRH-16<i>R</i>-Aminoratjadone</b>                                      | 1060                          |
| Biotin-PEG <sub>3</sub> -16 <i>S</i> -Aminoratjadone <b>36</b>                   | 152                           |

## Analysis of cell labeling with fluorescein-labeled conjugates

All cell lines were maintained as recommended by the American Type Culture Collection in DMEM or RPMI containing 5% glutamine (Thermo Fisher Scientific, Waltham, USA) supplemented with 10% FBS (Thermo Fisher Scientific, Waltham, USA). For flow cytometric analysis cells were detached by trypsin and the density was adjusted to  $2 \times 10^6$  cells/ml. The cell suspension was incubated with compounds at  $1 \mu\text{M}$  final concentration for 30min at  $37^\circ\text{C}$ , followed by two washing steps in PBS. For analysis of fluorescein intensity a LSRFortessa™ with FACSDiva™ software (BD Biosciences, Heidelberg, Germany) with the 488nm laser in combination with 525/50nm band pass filter was used. Data was evaluated using FlowJo software (FLOWJO LLC, Oregon, US).

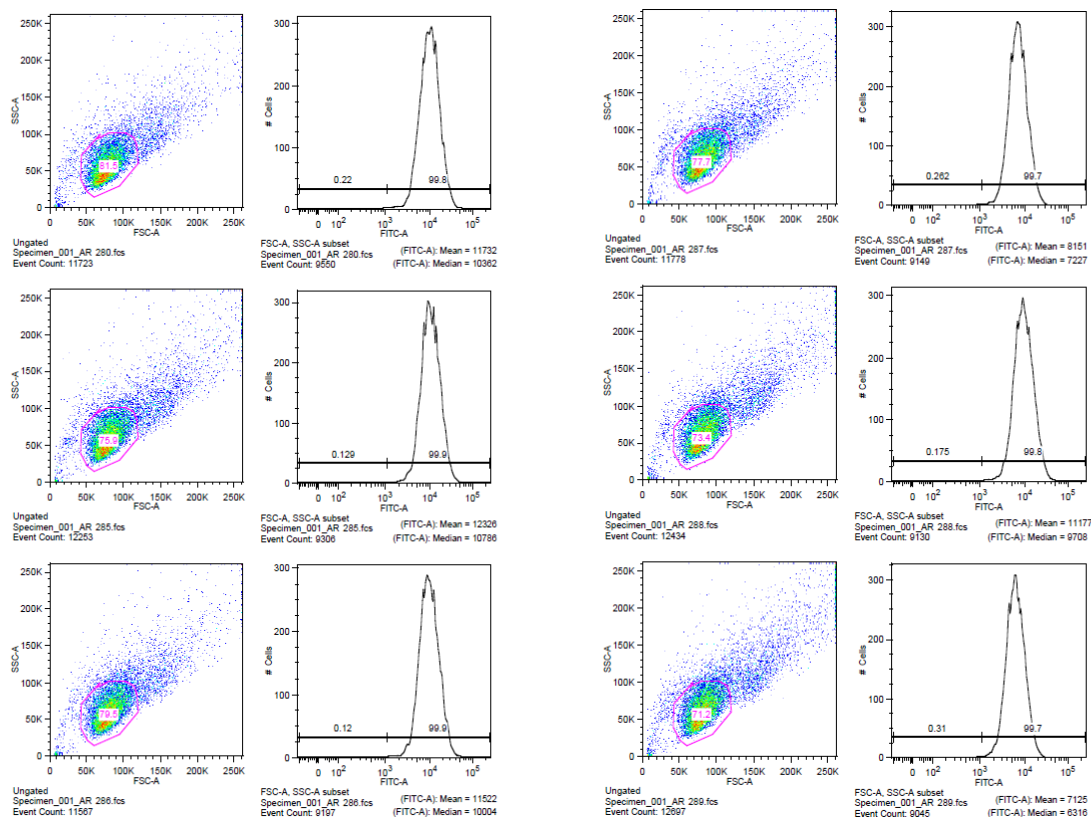

Figure S9: Left columns: Flow cytometry of KB 3.1 cells labeled with different Folate-Fluorescein Conjugates (AR280 = **FA-1a-FITC**, AR285 = **FA-10b-FITC**, AR286 = **FA-3a-FITC**, AR287 = **FA-6b-FITC**, AR288 = **FA-3b-FITC**, AR289 = **FA-4a-(FITC)<sub>2</sub>**) shown in a dotplot, (SSC = side scatter, FSC = forward scatter), right columns: Fluorescence intensity per cell number.

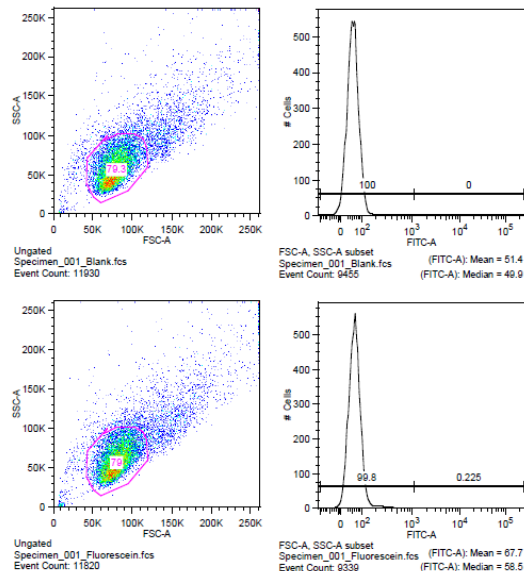

Figure S10: Left columns: Flow cytometry of KB 3.1 cells with Fluorescein as blank shown in a dotplot, (SSC = side scatter, FSC = forward scatter), right columns: Fluorescence intensity per cell number.

For confocal microscopy cells were seeded at a density of  $0.2 \times 10^5$  cells/well into 8 well microscopy chambers (Ibidi GmbH, Martinsried, Germany). The following day compounds were added at  $1 \mu\text{M}$  final concentration. Cells were imaged after indicated timepoints on an ECLIPSE Ti (Nikon) equipped with UltraVIEW VoX spinning disc (Perkin Elmer, Waltham, US), ORCA-R2 camera (Hamamatsu Photonics, Japan) and Volocity software 6.1.1 (Perkin Elmer, Waltham, US).

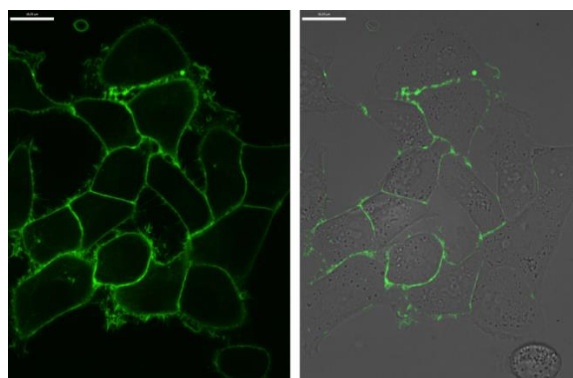

Figure S11: Cell imaging of KB 3.1 cells treated with 70 nM FA-1a-FITC (AR280) in in folate-free RPMI medium with 10% folate-containing FCS.

### Streptavidin-Pull-down with Ratjadone-biotin and identification of exportin by LC-MSMS

A chemical pull down was performed to verify binding of ratjadone to Crm1. HeLa cells were treated with ratjadone-biotin, ratjadone or both at 0.1µg/ml final concentration for 5h. Cells were detached by scraping, washed twice in PBS and lysed in MPER-buffer (Thermo Fisher, Waltham, USA) supplemented with complete protease inhibitor (Roche, Mannheim, Germany). After 5min incubation on ice the lysate was centrifuged (20min, 13000rpm, 4°C) and the supernatant was incubated with streptavidin sepharose high performance (GE healthcare, Freiburg, Germany) overnight at 4°C. The next day beads were washed twice with PBS and resuspended in elution buffer (Roth) and heated to 95°C for 10min. 5% were tested on WesternBlot with a biotin-specific antibody.

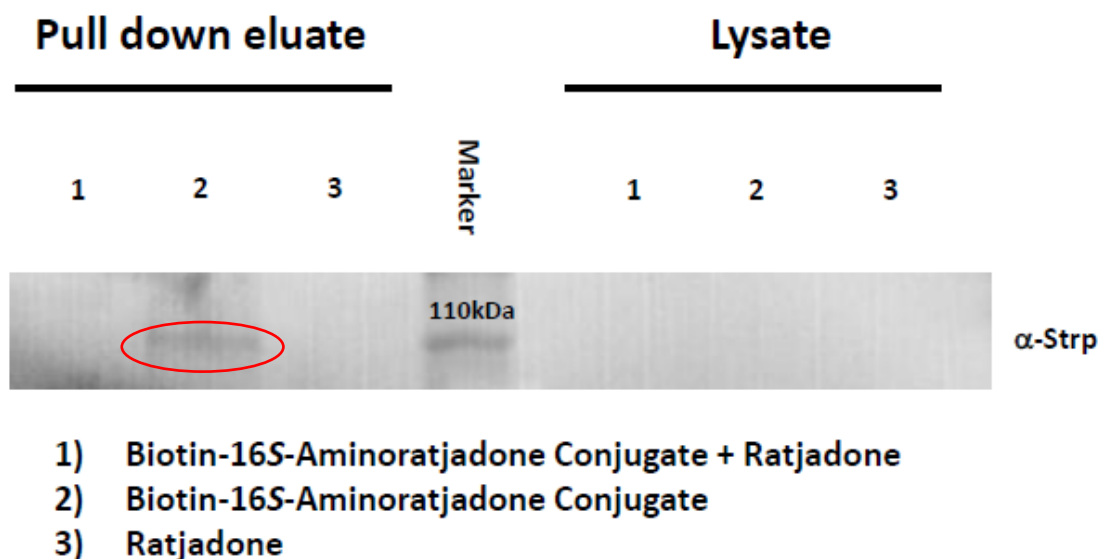

Figure S12: Gel of  $\alpha$ -Streptavidin pulldown experiment: Identification of protein band in the eluat of **Biotin-PEG<sub>3</sub>-16S-Aminoratjadone**.

Proteins from the remaining sample were extracted according to a procedure of *Wessel and Flügge*<sup>14</sup> and digested in 50 mM triethylammonium bicarbonate (TEAB) containing 10 % acetonitrile (ACN). The proteins were reduced in 10 mM TCEP (triscarboxyethylphosphine) for 30 min at 56°C and alkylated with 20 mM MMTS (methyl methanethiosulfonate). A protein/protease ratio of about 50:1 was applied and digestion was performed at 37°C overnight. Peptides were vacuum dried, resolved in 0.2 % trifluoroacetic acid (TFA) in water, desalted on self-packed Lichroprep RP18 (10 µL, Merck), eluted with 0.2 % TFA in 60 % ACN and dried again. Samples were resuspended in 0.2 % TFA (Trifluoro acetic acid) with 3% acetonitrile and injected.

*LC-MS/MS analyses of and data interpretation*—LC-MS/MS analyses of purified and desalted peptides were performed on a Dionex UltiMate 3000 n-RSLC system connected to an Orbitrap Fusion™ Tribrid™ mass spectrometer (Thermo Scientific). Peptides were loaded onto a C<sub>18</sub> pre-column (3 μm RP18 beads, Acclaim, 75 μm x 20 mm), washed for 3 min at a flow rate of 6 μL/min and separated on a C<sub>18</sub> analytical column (3-μm, Acclaim PepMap RSLC, 75 μm x 50 cm, Dionex) at a flow rate of 200 nL/min via a linear 30 min gradient from 97% buffer A (buffer A = 0.1% formic acid in water) to 25% B (buffer B = 0.1% formic acid in 80% acetonitrile), followed by a 15 min gradient from 25% buffer B to 62% buffer B. The LC system was operated with the Chromeleon software (version 6.8, Dionex) embedded in the Xcalibur software suite (version 3.0.63, Thermo Scientific, Dreieich, Germany). The effluent was electro-sprayed by a stainless steel emitter (Thermo). The mass spectrometer was controlled and operated in the data-dependent mode, using the Xcalibur software allowing the automatic selection of 2-4 fold charged peptides and their subsequent fragmentation using CID for fragmentation and the ion trap (IT) for detection of ions. (top speed mode). Every 3 seconds a new MS survey scan was performed. The maximum collection time for peptides was set to 100 ms. Dynamic exclusion was set to 6 sec.

MS/MS raw data files were processed via the Proteome Discoverer program Version 2.1 (Thermo Scientific, Dreieich, Germany) on a Mascot server (V. 2.4, Matrix Science) using UniProtKB database (release 2018\_01, taxonomy: *Homo sapiens*).

The following search parameters were used: enzyme, trypsin; maximum missed cleavages, 1; fixed modification: Methylthio (C); variable modification: oxidation (M); peptide tolerance, 7 ppm; MS/MS tolerance, 0,4 Da. The Proteome Discoverer result file, containing all masterproteins with 3 or more unique peptides were exported to Excel after removal of keratin contaminants.

| Accession     | Description                                                                          | Abundances      |                |                | No. of Unique Peptides | Sum PEP Score  | Coverage [%] | No. of Peptides | # PSMs      | Score       | Masoc            | Gene Symbol                                              | Modifications |
|---------------|--------------------------------------------------------------------------------------|-----------------|----------------|----------------|------------------------|----------------|--------------|-----------------|-------------|-------------|------------------|----------------------------------------------------------|---------------|
|               |                                                                                      | Bio Ratj + Ratj | Bio Ratj       | Ratj           |                        |                |              |                 |             |             |                  |                                                          |               |
| P07079        | Actin, cytoplasmic 1, OS=Homo sapiens GN:ACTB PE1 SV1                                | 7.8E+08         | 1.2E+09        | 1.1E+09        | 8                      | 703,367        | 58           | 24              | 218         | 4403        | ACTB             | Methylation (C18)                                        |               |
| P13108        | Pyruvate carboxylase, mitochondrial, OS=Homo sapiens GN:PFKP1 SV2                    | 7.8E+08         | 1.1E+09        | 1.1E+09        | 60                     | 333,271        | 54           | 60              | 303         | 2066        | PFKP1            | Methylation (C18, C131, C78)                             |               |
| <b>Q14980</b> | <b>Exportin-1, OS=Homo sapiens GN:KPN1 PE1 SV1</b>                                   | <b>6.0E+08</b>  | <b>4.0E+06</b> | <b>4.2E+06</b> | <b>81</b>              | <b>257,404</b> | <b>81</b>    | <b>117</b>      | <b>2918</b> | <b>2818</b> | <b>XPO1</b>      | <b>Methylation (C164, C1070)</b>                         |               |
| Q13305        | Acyl-CoA oxidase 1, OS=Homo sapiens GN:ACOX1 PE1 SV2                                 | 2.0E+08         | 3.8E+08        | 3.5E+08        | 70                     | 389,337        | 34           | 76              | 321         | 5992        | ACOX1            | Methylation (C200, C813, C1287, C1386, C1769)            |               |
| P13059        | Membrane protein 95P, OS=Homo sapiens GN:MP95 PE1 SV1                                | 2.1E+08         | 3.2E+08        | 3.1E+08        | 62                     | 296,068        | 27           | 62              | 119         | 2379        | MP95             | Methylation (C2, C7, C84, C1049, C180)                   |               |
| P11142        | Heat shock cognate 71 kDa protein, OS=Homo sapiens GN:HSP71 PE1 SV1                  | 1.9E+08         | 5.3E+08        | 4.0E+07        | 13                     | 66,318         | 28           | 17              | 34          | 835         | HSPA8            |                                                          |               |
| P18105        | DnaM1, OS=Homo sapiens GN:DND1 PE1 SV2                                               | 8.4E+07         | 8.3E+07        | 4.1E+07        | 5                      | 30,083         | 66           | 5               | 32          | 772         | DND1             |                                                          |               |
| P08371        | Tubulin beta-4B chain, OS=Homo sapiens GN:TUBB4B PE1 SV1                             | 8.1E+07         | 8.1E+07        | 1.0E+08        | 4                      | 152,447        | 66           | 24              | 102         | 2417        | TUBB4B           | Methylation (C12, C235, C30)                             |               |
| Q08723        | Isratravir, OS=Homo sapiens GN:ISRA PE1 SV2                                          | 8.1E+07         | 8.4E+07        | 2.8E+07        | 23                     | 179,882        | 27           | 23              | 87          | 2506        | ISRA             |                                                          |               |
| F05HJ3        | Tubulin alpha chain, OS=Homo sapiens GN:TUBA1C PE1 SV1                               | 6.5E+07         | 1.1E+08        | 1.1E+08        | 7                      | 92,388         | 39           | 18              | 88          | 1951        | TUBA1C           | Methylation (C85, C417)                                  |               |
| P08871        | Hemoglobin subunit beta, OS=Homo sapiens GN:HBB PE1 SV2                              | 6.4E+07         | 2.8E+07        | 2.8E+07        | 7                      | 28,866         | 48           | 7               | 20          | 515         | HBB              |                                                          |               |
| P18089        | 60 kDa heat shock protein, mitochondrial, OS=Homo sapiens GN:HSP60 PE1 SV2           | 5.9E+07         | 5.9E+07        | 5.9E+07        | 26                     | 103,939        | 68           | 26              | 72          | 1761        | HSP60            | Methylation (C147)                                       |               |
| P29411        | Transketolase, OS=Homo sapiens GN:TKT PE1 SV3                                        | 5.7E+07         | 1.0E+08        | 9.7E+07        | 20                     | 81,162         | 81           | 20              | 67          | 1285        | TKT              |                                                          |               |
| P14418        | Pyruvate kinase, PKM, OS=Homo sapiens GN:PKM PE1 SV4                                 | 5.6E+07         | 7.9E+07        | 6.7E+07        | 34                     | 115,773        | 49           | 24              | 86          | 1555        | PKM              | Methylation (C4)                                         |               |
| Q08623        | Hexokinase 2, OS=Homo sapiens GN:HK2 PE1 SV1                                         | 4.9E+07         | 5.9E+07        | 7.0E+07        | 22                     | 128,959        | 42           | 22              | 71          | 1369        | HK2              | Methylation (C190, C382)                                 |               |
| P09505        | Hemoglobin subunit alpha, OS=Homo sapiens GN:HA1 PE1 SV2                             | 4.4E+07         | 2.8E+07        | 4.0E+07        | 4                      | 24,933         | 38           | 4               | 20          | 347         | HA1              |                                                          |               |
| P35568        | Nuclear pore complex protein, Nup214, OS=Homo sapiens GN:NUP214 PE1 SV2              | 4.2E+07         | 8.5E+07        | 5.0E+07        | 8                      | 24,839         | 7            | 8               | 12          | 218         | NUP214           | Methylation (C100)                                       |               |
| Q08510        | Perlecan, OS=Homo sapiens GN:PER1 PE1 SV1                                            | 4.2E+07         | 5.2E+07        | 4.0E+07        | 8                      | 33,052         | 49           | 9               | 34          | 603         | PER1             | Methylation (C19)                                        |               |
| P07355        | Annexin A2, OS=Homo sapiens GN:ANXA2 PE1 SV2                                         | 3.6E+07         | 5.0E+07        | 4.2E+07        | 20                     | 88,144         | 50           | 20              | 62          | 1412        | ANXA2            | Methylation (C18)                                        |               |
| PT2K59        | Protein-Cdk-2 catalytic beta chain, mitochondrial, OS=Homo sapiens GN:PFCCB PE1 SV1  | 3.6E+07         | 4.8E+07        | 4.2E+07        | 16                     | 86,476         | 37           | 16              | 58          | 1242        | PFCCB            | Methylation (C300, C322)                                 |               |
| P06670        | Annexin A1, OS=Homo sapiens GN:ANXA1 PE1 SV1                                         | 3.4E+07         | 3.8E+07        | 9.5E+07        | 28                     | 113,676        | 63           | 31              | 100         | 1872        | ANXA1            |                                                          |               |
| P51515        | Protein-Cdk-2 catalytic alpha chain, mitochondrial, OS=Homo sapiens GN:PFCCA PE1 SV1 | 3.3E+07         | 5.0E+07        | 4.7E+07        | 21                     | 109,662        | 28           | 21              | 72          | 1494        | PFCCA            |                                                          |               |
| P07792        | Heat shock protein beta-1, OS=Homo sapiens GN:HSPB1 PE1 SV2                          | 3.3E+07         | 3.0E+07        | 3.0E+07        | 10                     | 36,107         | 53           | 10              | 36          | 787         | HSPB1            |                                                          |               |
| Q18229        | Heat shock protein, HSP 90 beta, OS=Homo sapiens GN:HSP90B1 PE1 SV1                  | 3.2E+07         | 5.0E+07        | 5.0E+07        | 14                     | 107,368        | 51           | 20              | 64          | 1423        | HSP90B1          |                                                          |               |
| P07647        | Acyl-CoA oxidase 4, OS=Homo sapiens GN:ACOX4 PE1 SV1                                 | 2.9E+07         | 7.1E+07        | 3.0E+06        | 10                     | 36,342         | 39           | 10              | 16          | 708         | ACOX4            |                                                          |               |
| P07737        | Tubulin beta chain, OS=Homo sapiens GN:TUBB2 PE1 SV2                                 | 2.8E+07         | 3.1E+07        | 3.1E+07        | 8                      | 19,023         | 58           | 23              | 101         | 2815        | TUBB2            | Methylation (C12, C132, C30)                             |               |
| JH4943        | 4F7 cell surface antigen heavy chain, OS=Homo sapiens GN:CD47 PE1 SV1                | 2.8E+07         | 1.8E+07        | 2.3E+07        | 8                      | 37,846         | 16           | 8               | 28          | 752         | CD47             |                                                          |               |
| Q08702        | Hexokinase 1, OS=Homo sapiens GN:HK1 PE1 SV1                                         | 2.7E+07         | 4.2E+07        | 3.9E+07        | 11                     | 78,879         | 25           | 11              | 49          | 1267        | HK1              | Methylation (C247)                                       |               |
| Q14213        | Desmoglein-1, OS=Homo sapiens GN:DSG1 PE1 SV2                                        | 2.0E+07         | 2.8E+07        | 5.9E+06        | 12                     | 58,909         | 38           | 12              | 33          | 612         | DSG1             |                                                          |               |
| P08104        | Fibrinogen alpha 1, OS=Homo sapiens GN:FIB1A PE1 SV1                                 | 1.7E+07         | 7.1E+07        | 1.5E+07        | 6                      | 20,046         | 16           | 6               | 17          | 988         | FIB1A            |                                                          |               |
| P08111        | Histone H1.1, OS=Homo sapiens GN:H1 PE1 SV1                                          | 1.5E+07         | 1.8E+07        | 2.0E+07        | 4                      | 9,338          | 4            | 4               | 9           | 101         | H1               | Methylation (C19, C101, C158)                            |               |
| Q08271        | Calmodulin-like protein 5, OS=Homo sapiens GN:CALML5 PE1 SV1                         | 1.4E+07         | 1.4E+07        | 1.0E+07        | 8                      | 27,882         | 59           | 8               | 21          | 390         | CALML5           |                                                          |               |
| P08032        | Actin, $\beta$ 4 cardiac muscle 1, OS=Homo sapiens GN:ACTC1 PE1 SV1                  | 1.2E+07         | 3.1E+07        | 1.0E+07        | 4                      | 127,465        | 42           | 18              | 107         | 3215        | ACTC1            |                                                          |               |
| P25716        | ATP synthase subunit beta, mitochondrial, OS=Homo sapiens GN:ATP5B1 PE1 SV1          | 1.2E+07         | 1.3E+07        | 2.8E+07        | 19                     | 69,652         | 32           | 19              | 49          | 1127        | ATP5B1           | Methylation (C152, C151)                                 |               |
| P07672        | Protein S100-A8, OS=Homo sapiens GN:S100A8 PE1 SV1                                   | 1.2E+07         | 2.5E+07        | 5.0E+06        | 4                      | 19,794         | 34           | 4               | 7           | 282         | S100A8           |                                                          |               |
| P07929        | Galectin-3, OS=Homo sapiens GN:GAL3 PE1 SV2                                          | 1.2E+07         | 1.9E+08        | 2.7E+05        | 4                      | 22,899         | 39           | 4               | 9           | 346         | GAL3             | Methylation (C157, C167)                                 |               |
| P25267        | Pappalysin 1, OS=Homo sapiens GN:PAP1 PE1 SV2                                        | 1.1E+07         | 2.7E+07        | 1.4E+07        | 7                      | 35,582         | 59           | 7               | 25          | 476         | PAP1             | Methylation (C25, C33, C41, C57, C108, C109, C108, C109) |               |
| P25258        | Cannflin, B, OS=Homo sapiens GN:CNFB PE1 SV2                                         | 9.9E+06         | 7.6E+07        | 2.4E+06        | 4                      | 7,346          | 53           | 4               | 4           | 74          | CNFB             |                                                          |               |
| P20930        | Filaggrin, OS=Homo sapiens GN:FLG PE1 SV2                                            | 8.7E+06         | 1.6E+07        | 5.8E+06        | 7                      | 51,8           | 9            | 7               | 28          | 627         | FLG              |                                                          |               |
| Q104098       | Suprabasin, OS=Homo sapiens GN:KRT6B1 PE1 SV1                                        | 8.4E+06         | 5.4E+06        | 4.7E+06        | 5                      | 30,283         | 20           | 4               | 18          | 264         | KRT6B1           |                                                          |               |
| Q082487       | Alpha-2-macroglobin, OS=Homo sapiens GN:A2M PE1 SV1                                  | 8.1E+06         | 8.1E+06        | 7.0E+06        | 5                      | 13,133         | 11           | 5               | 6           | 68          | A2M              |                                                          |               |
| Q10482        | Filaggrin-2, OS=Homo sapiens GN:FLG2 PE1 SV1                                         | 7.8E+06         | 3.1E+07        | 3.9E+06        | 13                     | 72,845         | 18           | 15              | 27          | 389         | FLG2             | Methylation (C26)                                        |               |
| P07805        | Histone H4, OS=Homo sapiens GN:H4 PE1 SV1                                            | 7.3E+06         | 4.4E+06        | 1.1E+07        | 5                      | 16,423         | 40           | 5               | 14          | 223         | HISTH4A, HISTH4F |                                                          |               |
| P25109        | Protein S100-A8, OS=Homo sapiens GN:S100A8 PE1 SV1                                   | 6.5E+06         | 5.6E+06        | 6.9E+05        | 5                      | 18,887         | 45           | 5               | 11          | 196         | S100A8           | Methylation (C4)                                         |               |
| P00338        | L-lactate dehydrogenase A chain, OS=Homo sapiens GN:LDHA PE1 SV2                     | 6.5E+06         | 5.7E+06        | 4.2E+06        | 4                      | 19,378         | 17           | 5               | 16          | 393         | LDHA             | Methylation (C18)                                        |               |
| P05976        | ATP synthase subunit beta, mitochondrial, OS=Homo sapiens GN:ATP5B1 PE1 SV1          | 6.5E+06         | 5.1E+06        | 8.1E+06        | 8                      | 45,002         | 25           | 8               | 27          | 436         | ATP5B1           |                                                          |               |
| Q14162        | OSN1, OS=Homo sapiens GN:OSN1 PE1 SV1                                                | 6.5E+06         | 5.8E+06        | 1.5E+06        | 6                      | 16,837         | 14           | 6               | 14          | 171         | OSN1             | Methylation (C151, C148)                                 |               |
| Q08554        | Desmoglein-1, OS=Homo sapiens GN:DSG1 PE1 SV2                                        | 6.4E+06         | 9.3E+06        | 1.9E+06        | 6                      | 34,556         | 10           | 6               | 18          | 804         | DSG1             | Methylation (C136, C45)                                  |               |
| U13041D       | Histone H2B, OS=Homo sapiens GN:H2B PE1 SV1                                          | 6.0E+06         | 2.8E+06        | 3.0E+06        | 3                      | 17,496         | 21           | 3               | 12          | 456         | HISTH2BN         |                                                          |               |
| P07123        | Alpha-enolase, OS=Homo sapiens GN:ENO1 PE1 SV2                                       | 5.7E+06         | 5.8E+07        | 8.1E+06        | 8                      | 29,328         | 31           | 8               | 12          | 266         | ENO1             |                                                          |               |
| Q43175        | D-3-phosphoglycerate dehydrogenase, OS=Homo sapiens GN:PHGDH PE1 SV1                 | 5.7E+06         | 5.7E+06        | 6.1E+06        | 6                      | 29,768         | 13           | 6               | 9           | 91          | PHGDH            | Methylation (C3)                                         |               |
| P29279        | Ubiquitin-48 ribosomal protein, S27A, OS=Homo sapiens GN:RPS27A PE1 SV2              | 5.2E+06         | 5.4E+06        | 5.2E+06        | 5                      | 15,053         | 31           | 5               | 19          | 292         | RPS27A           |                                                          |               |
| P08846        | Oxaloacetate transaminase, mitochondrial, OS=Homo sapiens GN:PFKP1 PE1 SV2           | 5.0E+06         | 5.4E+06        | 4.0E+06        | 6                      | 29,399         | 25           | 6               | 17          | 329         | PFKP1            |                                                          |               |
| P14923        | Annexin A1, OS=Homo sapiens GN:ANXA1 PE1 SV1                                         | 4.9E+06         | 1.2E+07        | 6.0E+05        | 6                      | 23,153         | 10           | 6               | 10          | 224         | ANXA1            | Methylation (C47)                                        |               |
| P07406        | Glyceroldehyde-3-phosphate dehydrogenase, OS=Homo sapiens GN:GAPDH PE1 SV1           | 4.9E+06         | 1.6E+07        | 1.2E+06        | 3                      | 15,441         | 22           | 5               | 6           | 188         | GAPDH            | Methylation (C247)                                       |               |
| P12193        | Fibrin alpha 1, OS=Homo sapiens GN:FIB1A PE1 SV1                                     | 4.9E+06         | 1.2E+07        | 1.1E+07        | 17                     | 69,238         | 30           | 17              | 37          | 576         | FIB1A            |                                                          |               |
| P25263        | Cellular nucleoside diphosphate kinase, OS=Homo sapiens GN:NDPK PE1 SV1              | 4.4E+06         | 5.8E+06        | 4.3E+06        | 5                      | 19,979         | 27           | 5               | 10          | 228         | NDPK             | Methylation (C14, C57, C158, C161)                       |               |
| Q09714        | 3-hydroxyacyl-CoA dehydrogenase, type 2, OS=Homo sapiens GN:HSD17B10 PE1 SV1         | 3.9E+06         | 5.8E+06        | 4.0E+06        | 7                      | 33,728         | 45           | 7               | 18          | 530         | HSD17B10         |                                                          |               |
| P01884        | Immunoglobulin kappa constant, OS=Homo sapiens GN:IGKC PE1 SV1                       | 3.7E+06         | 8.1E+06        | 7.7E+05        | 6                      | 23,201         | 81           | 6               | 10          | 124         | IGKC             | Methylation (C7, C8)                                     |               |
| P11021        | 78 kDa glucose oxidase protein, OS=Homo sapiens GN:GOSPE1 PE1 SV2                    | 3.7E+06         | 5.2E+06        | 4.0E+06        | 12                     | 50,161         | 27           | 14              | 23          | 334         | GOSPE1           |                                                          |               |
| P04083        | Annexin A1, OS=Homo sapiens GN:ANXA1 PE1 SV2                                         | 3.6E+06         | 2.7E+06        | 5.7E+05        | 7                      | 28,744         | 22           | 7               | 15          | 434         | ANXA1            |                                                          |               |
| P30379        | Myosin 8, OS=Homo sapiens GN:MYH8 PE1 SV1                                            | 3.4E+06         | 7.6E+06        | 1.1E+07        | 21                     | 70,013         | 14           | 21              | 30          | 461         | MYH8             | Methylation (C917)                                       |               |
| Q08119        | Tubulin beta 4B chain, OS=Homo sapiens GN:TUBB4B PE1 SV1                             | 3.1E+06         | 2.8E+06        | 5.3E+06        | 8                      | 95,218         | 27           | 12              | 43          | 833         | TUBB4B           | Methylation (C12, C20)                                   |               |
| Q08703        | Retinol 4, OS=Homo sapiens GN:RPL4 PE1 SV1                                           | 3.1E+06         | 6.5E+05        | 3.1E+06        | 3                      | 6,077          | 3            | 3               | 3           | 64          | RPL4             |                                                          |               |
| P10599        | Thio redoxin, OS=Homo sapiens GN:TRX PE1 SV1                                         | 3.1E+06         | 7.6E+06        | 2.0E+06        | 3                      | 14,273         | 30           | 3               | 15          | 169         | TRX              |                                                          |               |
| P05189        | Nucleophosmin, OS=Homo sapiens GN:NPM1 PE1 SV1                                       | 2.8E+06         | 3.8E+06        | 3.3E+06        | 6                      | 39,501         | 28           | 6               | 19          | 709         | NPM1             |                                                          |               |
| P19147        | 14-3-3 protein sigma, OS=Homo sapiens GN:SF1 PE1 SV1                                 | 2.7E+06         | 4.0E+06        | 1.0E+05        | 3                      | 8,611          | 16           | 3               | 5           | 95          | SF1              | Methylation (C3)                                         |               |
| ADA0221W1     | Heat shock 70 kDa protein 13, OS=Homo sapiens GN:HSPA1B PE1 SV1                      | 2.3E+06         | 4.5E+06        | 2.1E+06        | 7                      | 39,795         | 19           | 10              | 20          | 492         | HSPA1B           |                                                          |               |
| P22131        | Perolepidin-2, OS=Homo sapiens GN:PLED2 PE1 SV1                                      | 2.1E+06         | 9.3E+06        | 2.2E+06        | 4                      | 14,807         | 27           | 5               | 12          | 233         | PLED2            |                                                          |               |
| P18181        | 11kDa, Hsp, Hsc70 family, Hsp70, OS=Homo sapiens GN:HSP70 PE1 SV1                    | 2.1E+06         | 2.3E+06        | 2.8E+06        | 3                      | 11,897         | 21           | 5               | 6           | 112         | HSPA70           |                                                          |               |
| P07023        | Branin, alpha, soluble protein 1, OS=Homo sapiens GN:BRP1 PE1 SV2                    | 2.1E+06         | 7.9E+06        | 3.8E+06        | 6                      | 21,901         | 54           | 6               | 8           | 212         | BRP1             |                                                          |               |
| P25252        | Preonin-1, OS=Homo sapiens GN:PN1 PE1 SV1                                            | 2.0E+06         | 2.1E+06        | 4.4E+05        | 5                      | 12,712         | 21           | 5               | 8           | 107         | PN1              |                                                          |               |
| P13829        | Elongation factor 2, OS=Homo sapiens GN:EF2 PE1 SV1                                  | 1.9E+06         | 8.5E+05        | 3.2E+06        | 4                      | 12,189         | 6            | 4               | 8           | 133         | EF2              |                                                          |               |
| P72624        | Myosin light polypeptide 6, OS=Homo sapiens GN:MYL6 PE1 SV1                          | 1.8E+06         | 2.3E+06        | 2.3E+06        | 4                      | 13,028         | 20           | 4               | 11          | 151         | MYL6             |                                                          |               |
| P40727        | Tropomyosin beta, OS=Homo sapiens GN:TROPB PE1 SV1                                   | 1.8E+06         | 1.9E+06        | 9.1E+05        | 3                      | 7,179          | 6            | 3               | 6           | 69          | TROPB            |                                                          |               |
| P11277        | Microtubule regulator, inhibition factor, OS=Homo sapiens GN:EIF1 PE1 SV1            | 1.5E+06         | 5.8E+05        | 3.1E+06        | 3                      | 10,182         | 21           | 3               | 4           | 111         | EIF1             | Methylation (C11)                                        |               |
| Q14697        | Neutral alpha-glucosidase A8, OS=Homo sapiens GN:GAA8 PE1 SV1                        | 1.0E+06         | 1.8E+06        | 4.8E+05        | 6                      |                |              |                 |             |             |                  |                                                          |               |



## Plasma stability assay

**FA-7-Val-Cit-pABA-16R-Aminoratjadone** (PK008a), **FA-SS-16R-Aminoratjadone** (PK026a) and **FA-3b-L-Aminoratjadone** (PK058a) were dissolved in DMSO were added to human plasma (pH 7.4, 37°C) to yield a final concentration of 10 µg/ml. In addition, procaine, propoxycaine and procainamide (dissolved in DMSO) were added to human plasma (pH 7.4, 37°C) to yield a final concentration of 250 µM. Procaine and propoxycaine served as positive controls as they are known to be unstable in mouse plasma. Procainamide served as negative control as it is known to be stable in mouse plasma. The samples were incubated for 0 min, 30 min, 60 min, 90 min and 120 min at 37°C. At each time point 10 µl of the respective sample was extracted with 50 µl acetonitrile containing an internal standard for 15 min on ice. Then samples were centrifuged for 10 min at 1.000 rpm and the supernatants were transferred to greiner V-bottom 96well plates. All samples were analyzed via HPLC-MS using an Agilent 1290 Infinity II HPLC system coupled to an AB Sciex QTrap 6500plus mass spectrometer. HPLC conditions were as follows: column: Agilent Zorbax Eclipse Plus C18, 50x2.1 mm, 1.8 µm; temperature: 30°C; injection volume: 10 µl; flow rate 700 µl/min; solvent A: water + 0.1 % HCOOH; solvent B: acetonitrile + 0.1 % HCOOH; gradient pump 1: 99 % A at 0 min, 99 % - 0% A from 0.1 min to 5.50 min, 0 % A until 6.00 min, then 99 % A until 6.40 min, then 99 % A until 6.50 min; gradient pump 2: 99 % A at 0 min, 99-0 % A from 0.20 to 1 min, 0 % A until 4.50 min, 0-99 % A from 4.50 to 5.20 min, 99 % A until 6.50 min. Mass spectrometric conditions were as follows: Scan type: MRM. All compounds were detected in positive scan mode. Peak areas of each compound and of the internal standard were analyzed using MultiQuant 3.0 software (AB Sciex). Peaks were quantified using the transitions indicated in table S7. Peak areas of the respective compound were normalized to the respective peak areas at time point 0 min:  $B/A*100$  with A: peak area of the respective compound at time point 0 min, B: peak area of the respective internal standard at the respective time point. Every experiment was at least repeated three times independently.

Table S7: Transitions for the compounds

| Compound                                               | Q1 Mass [Da] | Q3 Mass [Da] | DP [volts] | CE [volts] | CXP [volts] |
|--------------------------------------------------------|--------------|--------------|------------|------------|-------------|
| FA-7-Val-Cit-pABA-16R-Aminoratjadone [M] <sup>2+</sup> | 874.195      | 459.0        | 131        | 17         | 22          |
| FA-7-Val-Cit-pABA-16R-Aminoratjadone [M] <sup>2+</sup> | 874.195      | 796.2        | 131        | 17         | 38          |
| FA-SS-16R-Aminoratjadone [M] <sup>2+</sup>             | 543.100      | 465.1        | 76         | 15         | 24          |
| FA-SS-16R-Aminoratjadone [M] <sup>2+</sup>             | 543.100      | 459.1        | 76         | 15         | 24          |
| FA-3b-L-Aminoratjadone [M] <sup>2+</sup>               | 798.324      | 459.0        | 61         | 19         | 36          |
| FA-3b-L-Aminoratjadone [M] <sup>2+</sup>               | 798.324      | 720.2        | 61         | 59         | 22          |
| Procainamid                                            | 235.744      | 163.0        | 80         | 21         | 18          |
| Procainamid                                            | 235.744      | 120.0        | 80         | 39         | 12          |
| Propoxycain                                            | 294.738      | 100.1        | 80         | 17         | 12          |
| Propoxycain                                            | 294.738      | 178.1        | 80         | 21         | 20          |
| Procain                                                | 236.773      | 100.0        | 80         | 21         | 12          |
| Procain                                                | 236.773      | 120.0        | 80         | 31         | 14          |

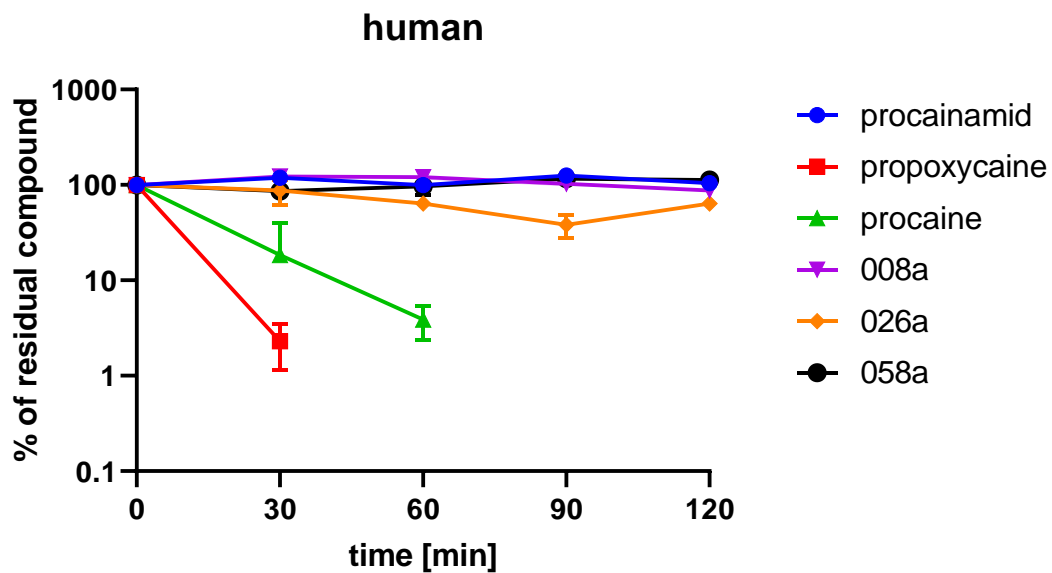

Figure S14: Logarithmic graph for stability in human plasma over time

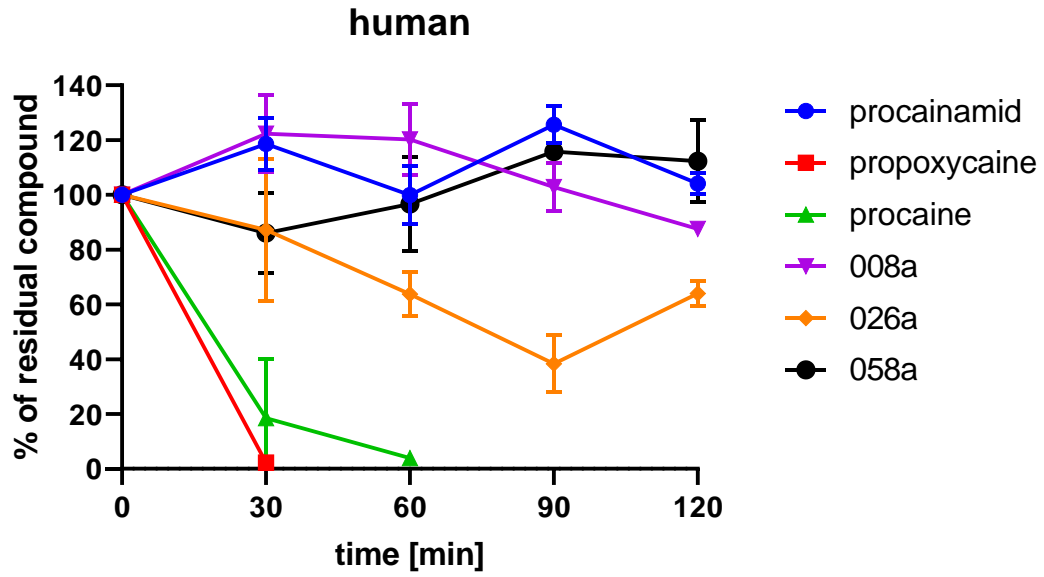

Figure 15: Linear graph for stability in human plasma over time

## References

- 1 D. Schummer, K. Gerth, H. Reichenbach and G. Höfle, *Liebigs Ann.*, 1995, 685–688.
- 2 K. Gerth, D. Schummer, G. Höfle, H. Irschik and H. Reichenbach, *J. Antibiot.*, 1995, **48**, 973–976.
- 3 WO1998011084, 1998.
- 4 T. R. Hoye and M. K. Renner, *J. Org. Chem.*, 1996, **7**, 8489–8495.
- 5 J. A. Dale, D. L. Dull and H. Mosher, *J. Org. Chem.*, 1969, **34**, 2543–2549.
- 6 D. A. Allen, A. E. Tomaso, O. P. Priest and W. S. Colleges, *J. Chem. Educ.*, 2008, **85**, 698–700.
- 7 M. Galibert, P. Dumy and D. Boturyn, *Angew. Chem. Int. Ed.*, 2009, **48**, 2576–2579.
- 8 WO2014/065661 A1, 2014.
- 9 T. Mosmann, *J. Immunol. Methods*, 1983, **65**, 55–63.
- 10 M. Köster, S. Lykke-Andersen, Y. A. Elnakady, K. Gerth, P. Washausen, G. Höfle, F. Sasse, J. Kjems and H. Hauser, *Exp. Cell Res.*, 2003, **286**, 321–331.
- 11 S. K. Knauer, S. Moodt, T. Berg, U. Liebel, R. Pepperkok and R. H. Stauber, *Traffic*, 2005, **6**, 594–606.
- 12 S. K. Knauer and R. H. Stauber, *Anal. Chem.*, 2005, **77**, 4815–4820.
- 13 V. Fetz, S. K. Knauer, C. Bier, J. P. von Kries and R. H. Stauber, *Sensors*, 2009, **9**, 5423–5445.
- 14 D. Wessel and U. I. Flugge, *Anal. Biochem.*, 1984, **138**, 141–143.
- 15 D. A. Hartmann, *Curr. Protoc. Pharmacol.*, 2002, **19**, 7.6.1–7.6.8.
- 16 M. Frigerio, M. Santagostino and S. Sputore, *J. Org. Chem.*, 1999, **64**, 4537–4538.
- 17 J. Dommerholt, S. Schmidt, R. Temming, L. J. A. Hendriks, F. P. J. T. Rutjes, J. C. M. Van Hest, D. J. Lefeber, P. Friedl and F. L. Van Delft, *Angew. Chem. Int. Ed.*, 2010, **49**, 9422–9425.
- 18 C. B. Vu, R. J. Bridges, C. Pena-Rasgado, A. E. Lacerda, C. Bordwell, A. Sewell, A. J. Nichols, S. Chandran, P. Lonkar, D. Picarella, A. Ting, A. Wensley, M. Yeager and F. Liu, *J. Med. Chem.*, 2017, **60**, 458–473.
- 19 S. H. L. Verhelst, M. D. Witte, S. Arastu-Kapur, M. Fonovic and M. Bogyo, *ChemBioChem*, 2006, **7**, 943–950.

## Appendix

 $^1\text{H}$ -NMR spectra,  $^{13}\text{C}$ -NMR spectra, IR spectra

**Ratjadone A (1)**- (R)-6-((1E,3Z,5R,7E,9E,11R)-11-hydroxy-11-((2S,4R,5S,6S)-4-hydroxy-5-methyl-6-((E)-prop-1-en-1-yl)tetrahydro-2H-pyran-2-yl)-3,5,7-trimethylundeca-1,3,7,9-tetraen-1-yl)-5,6-dihydro-2H-pyran-2-one

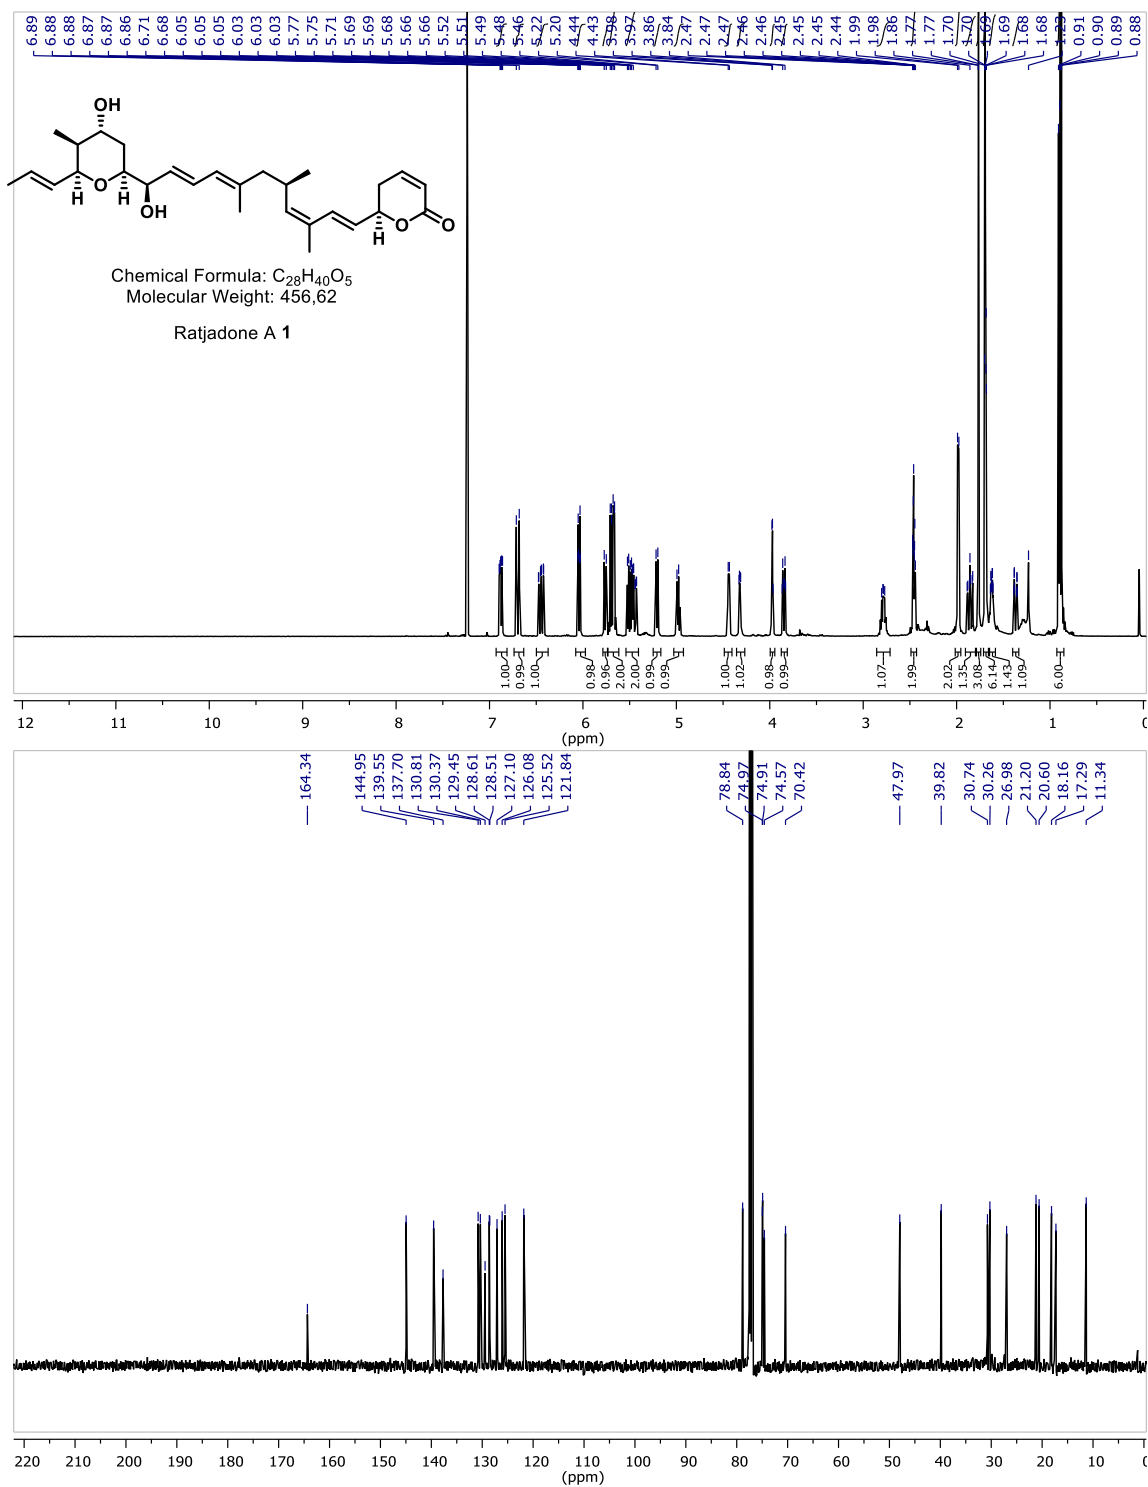

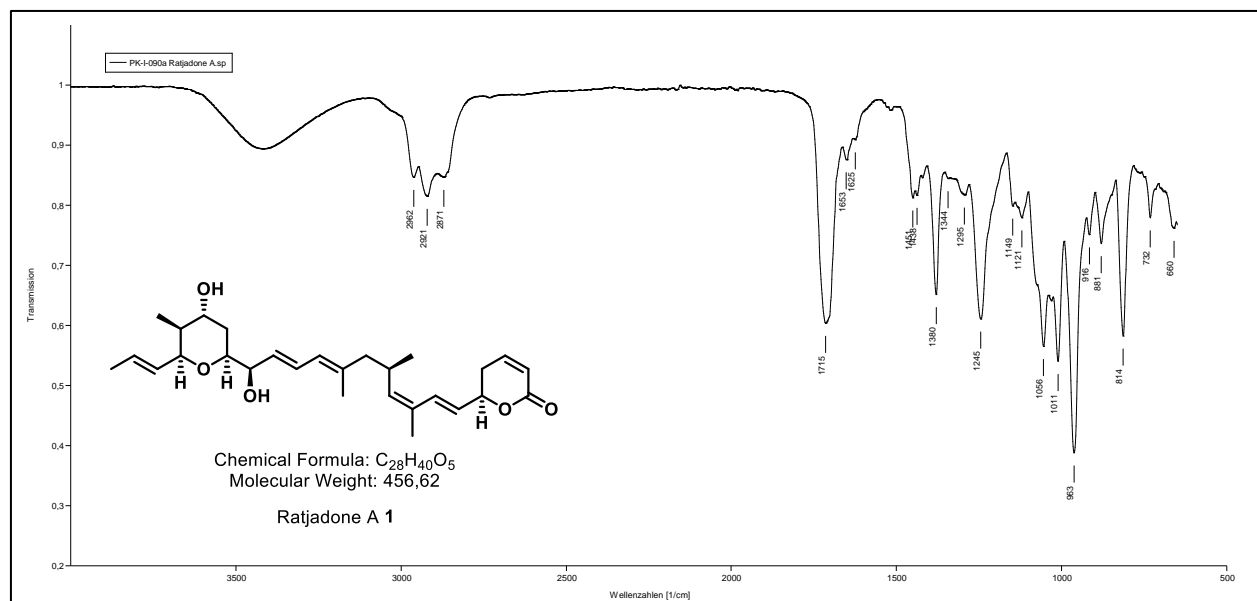

**16-Oxo-Ratjadone (13)** - (R)-6-((R,1E,3Z,7E,9E)-11-((2S,4R,5S,6S)-4-hydroxy-5-methyl-6-((E)-prop-1-en-1-yl)tetrahydro-2H-pyran-2-yl)-3,5,7-trimethyl-11-oxoundeca-1,3,7,9-tetraen-1-yl)-5,6-dihydro-2H-pyran-2-one

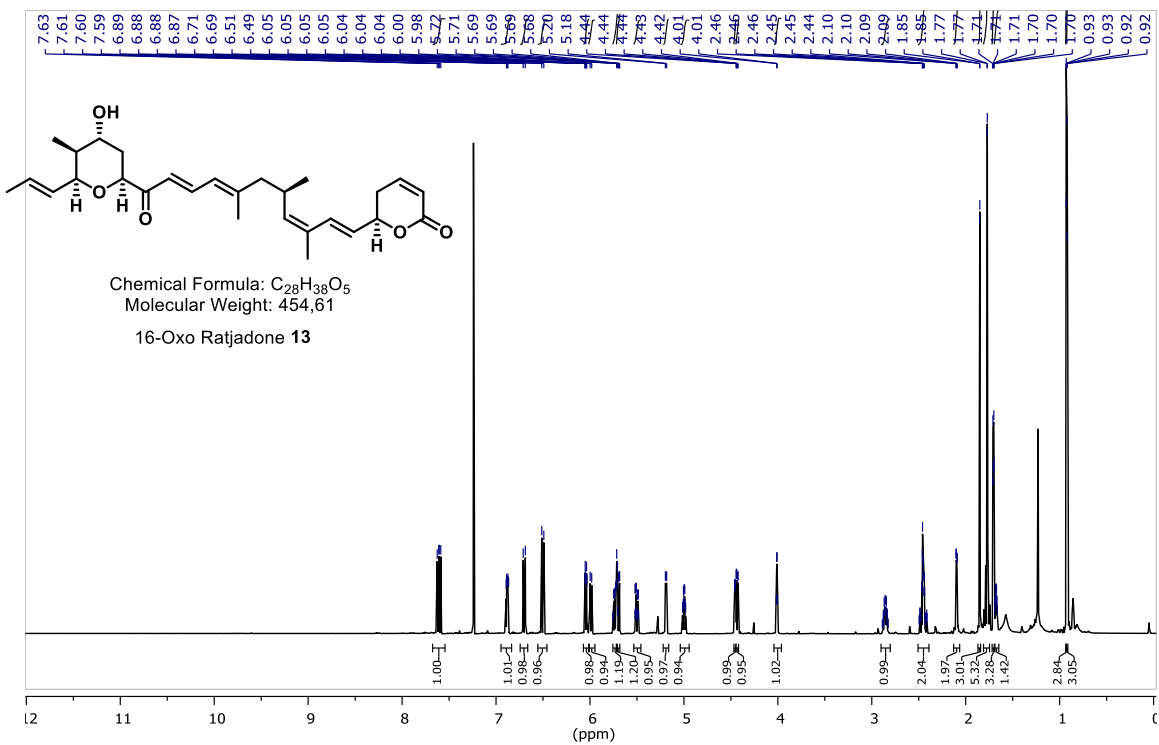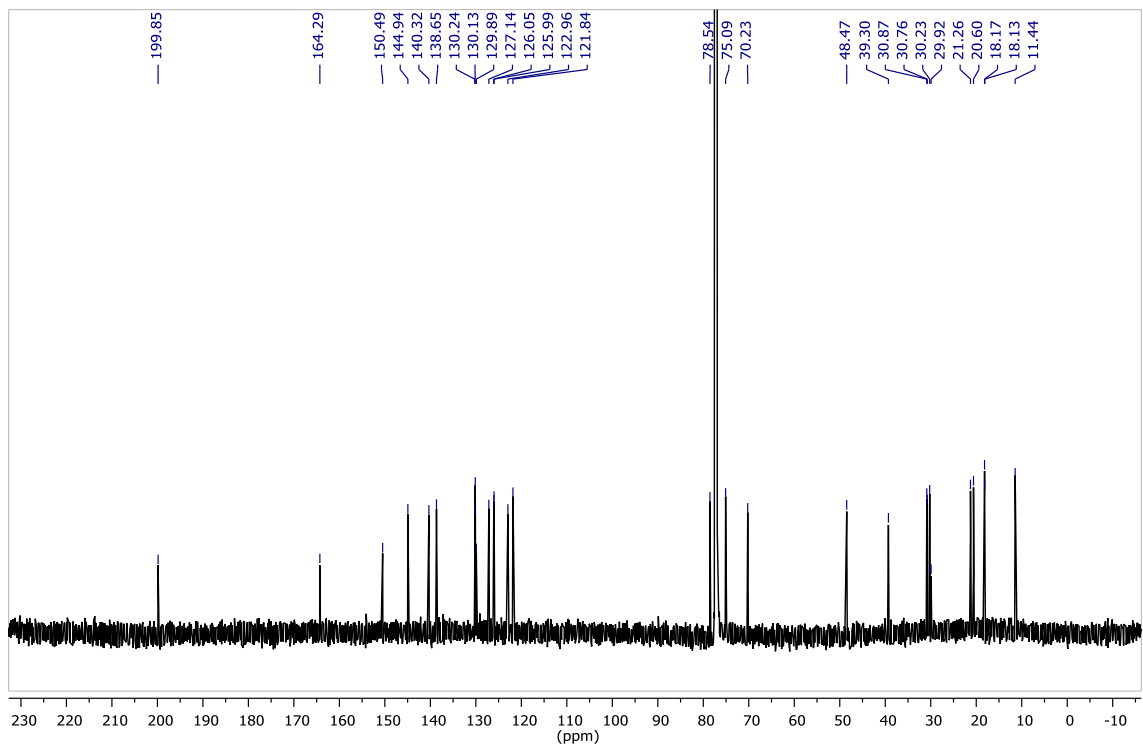

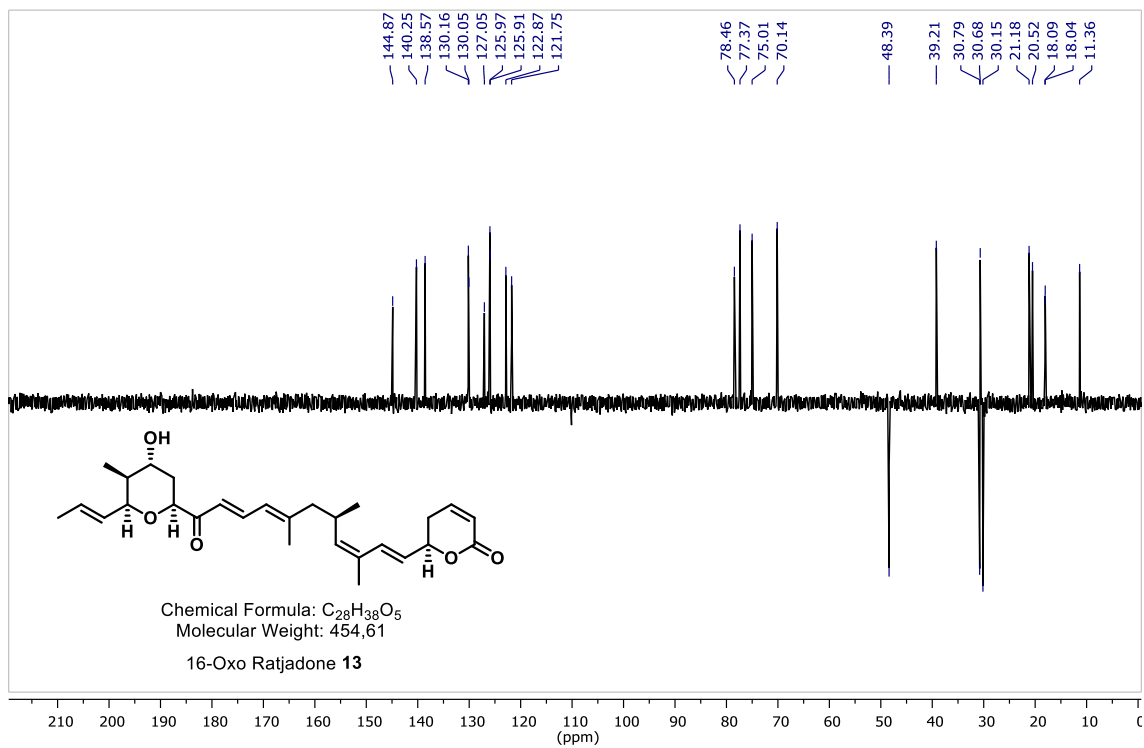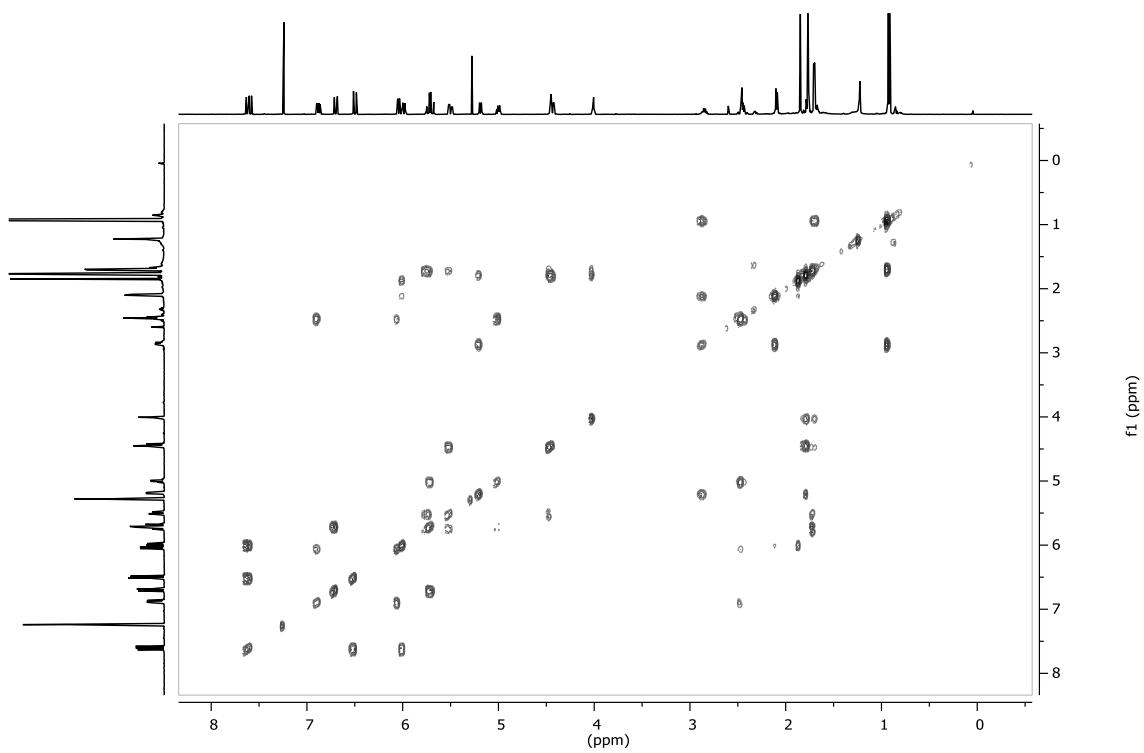



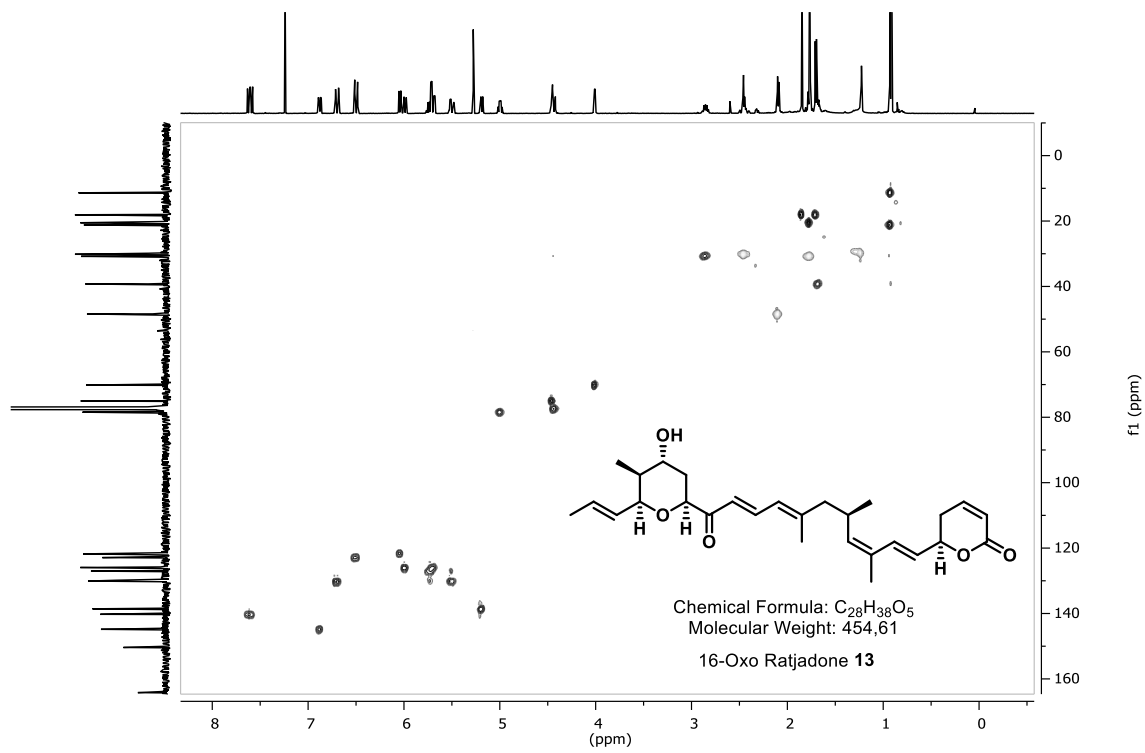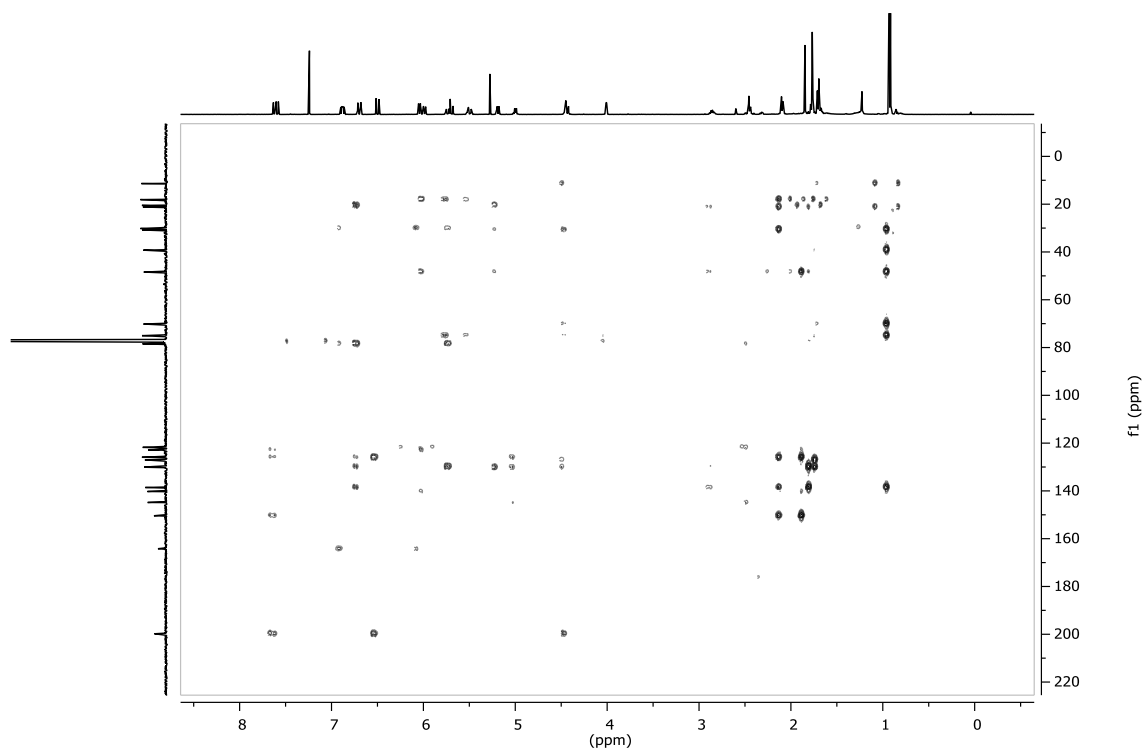

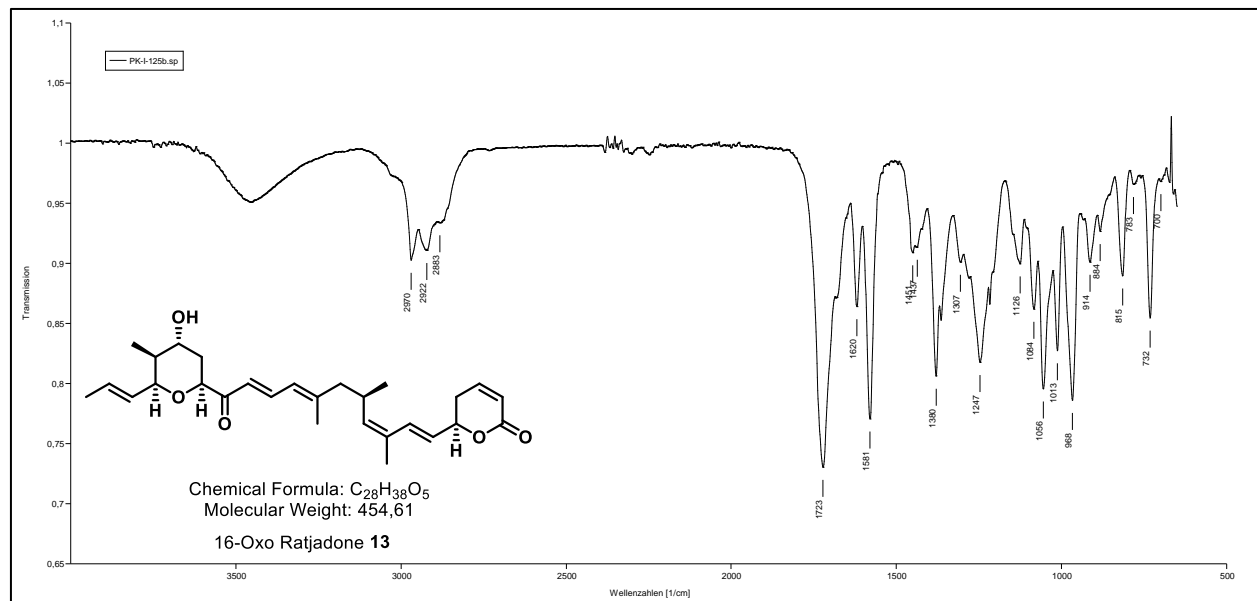

**19-Oxo-Ratjadone (14)** - (R)-6-((1E,3Z,5R,7E,9E,11R)-11-hydroxy-3,5,7-trimethyl-11-((2S,5R,6S)-5-methyl-4-oxo-6-((E)-prop-1-en-1-yl)tetrahydro-2H-pyran-2-yl)undeca-1,3,7,9-tetraen-1-yl)-5,6-dihydro-2H-pyran-2-one

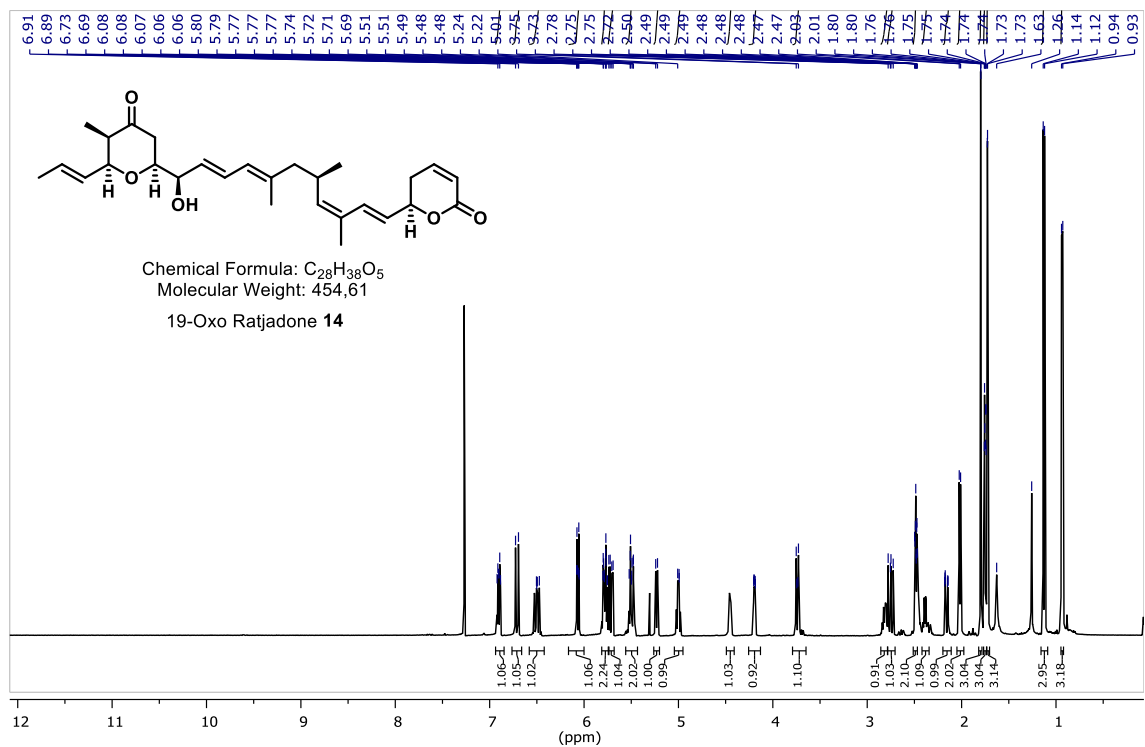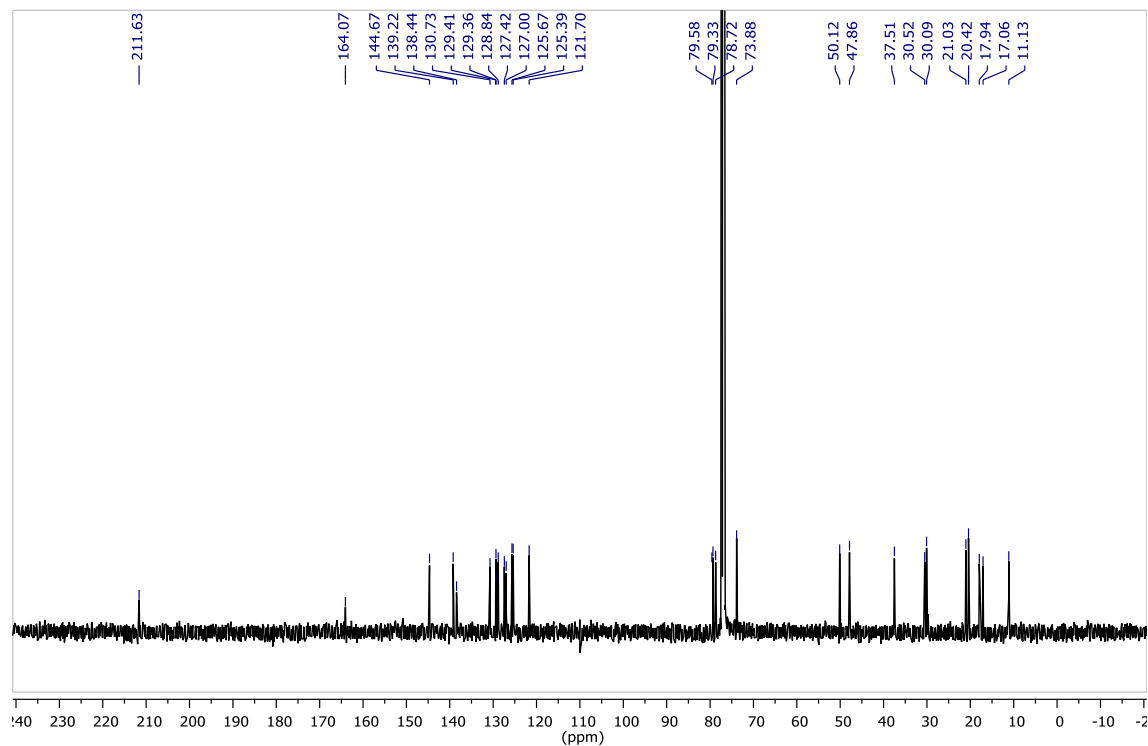

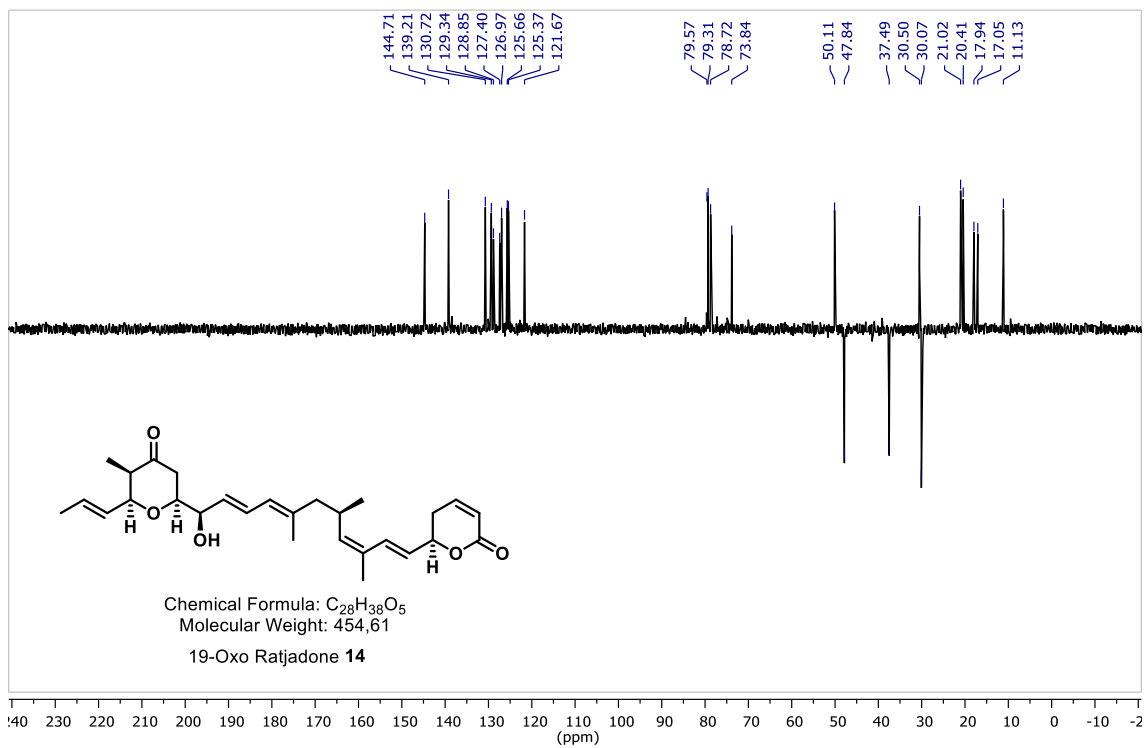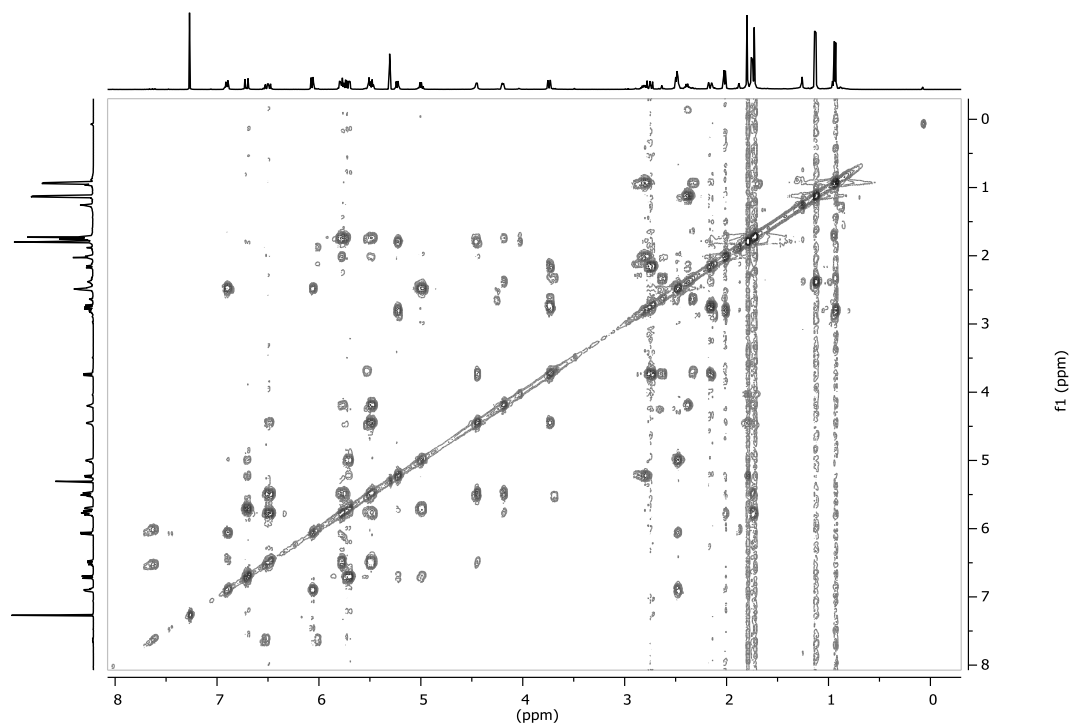

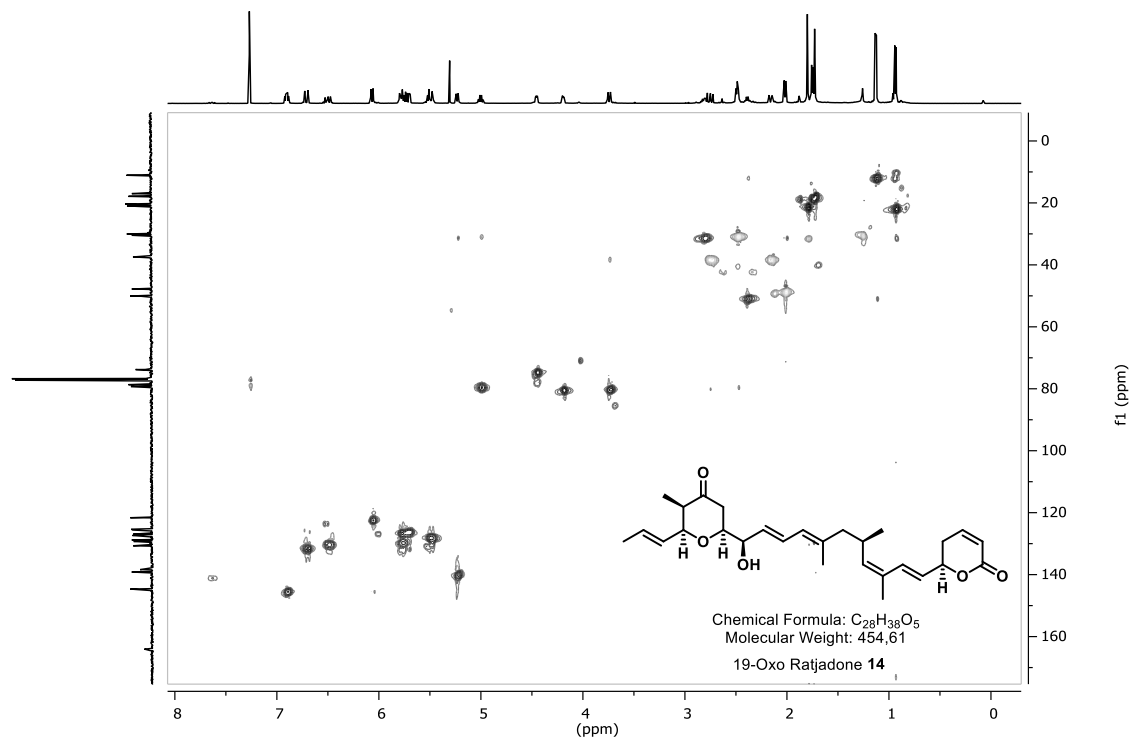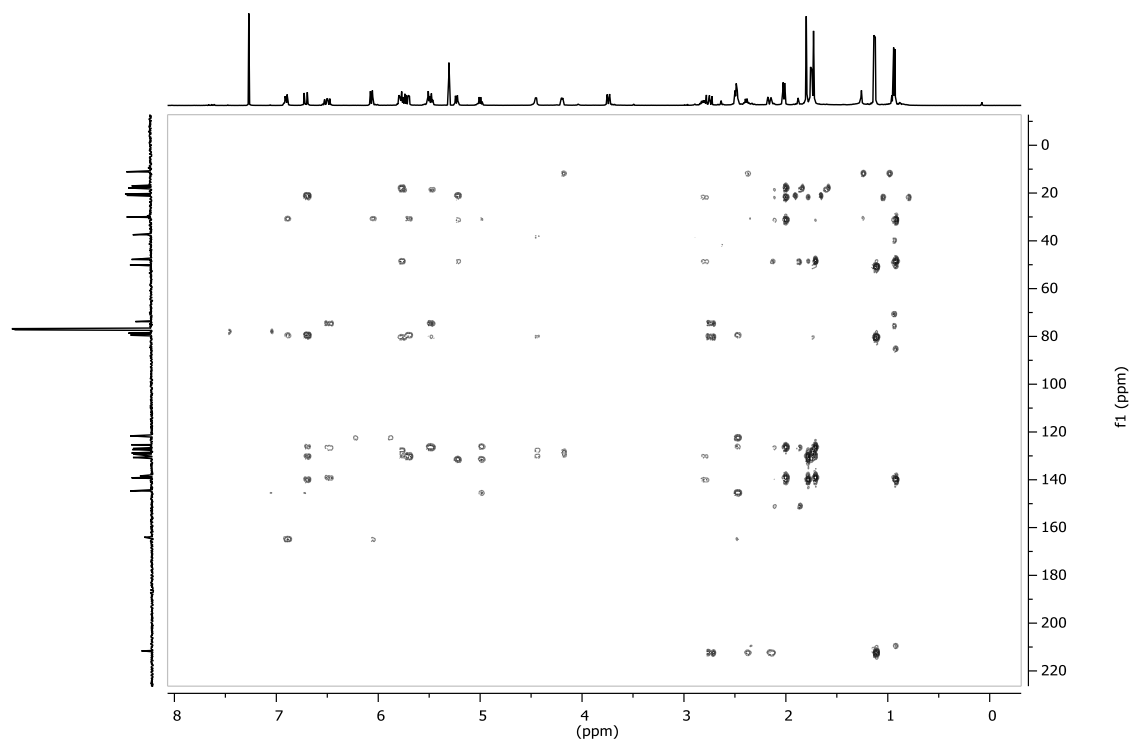

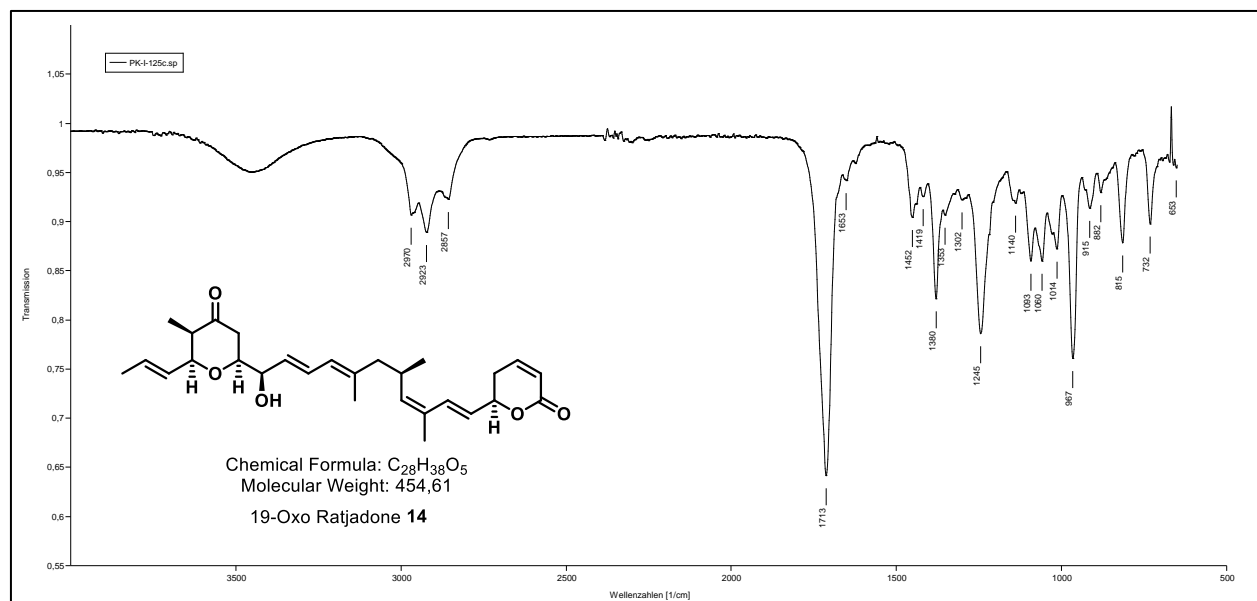

**16,19-Dioxo-Ratjadone (15)** – (R)-6-((R,1E,3Z,7E,9E)-3,5,7-trimethyl-11-((2S,5R,6S)-5-methyl-4-oxo-6-((E)-prop-1-en-1-yl)tetrahydro-2H-pyran-2-yl)-11-oxoundeca-1,3,7,9-tetraen-1-yl)-5,6-dihydro-2H-pyran-2-one

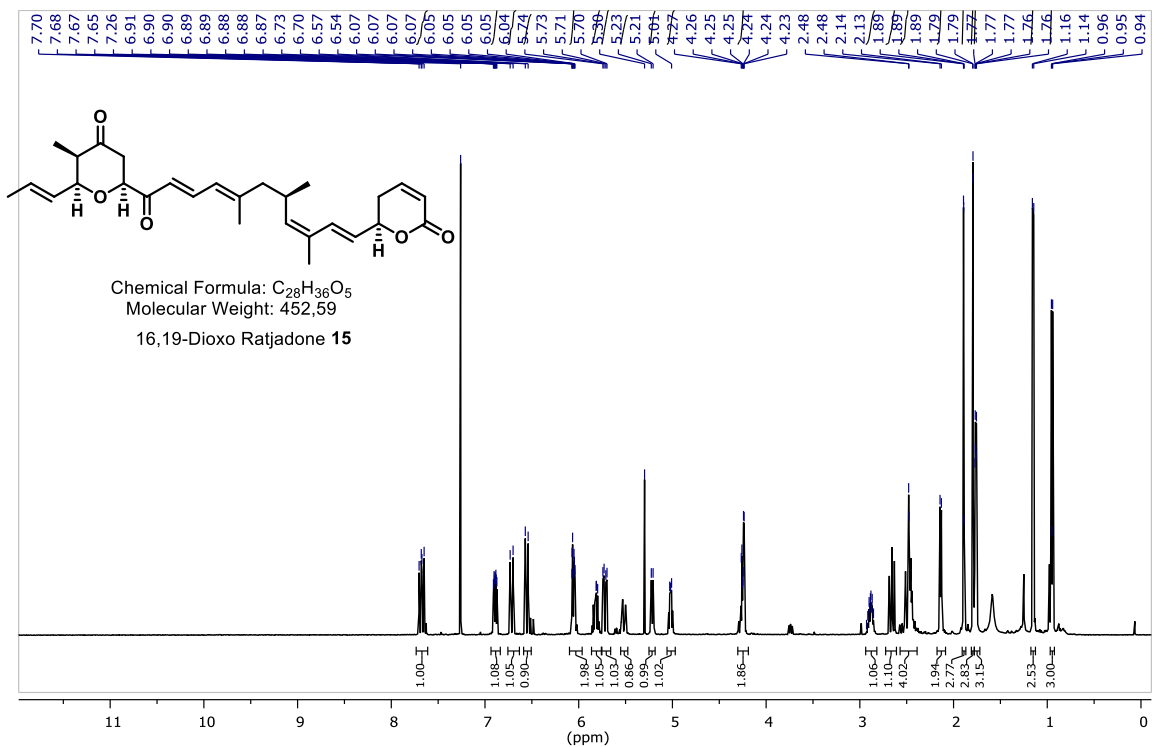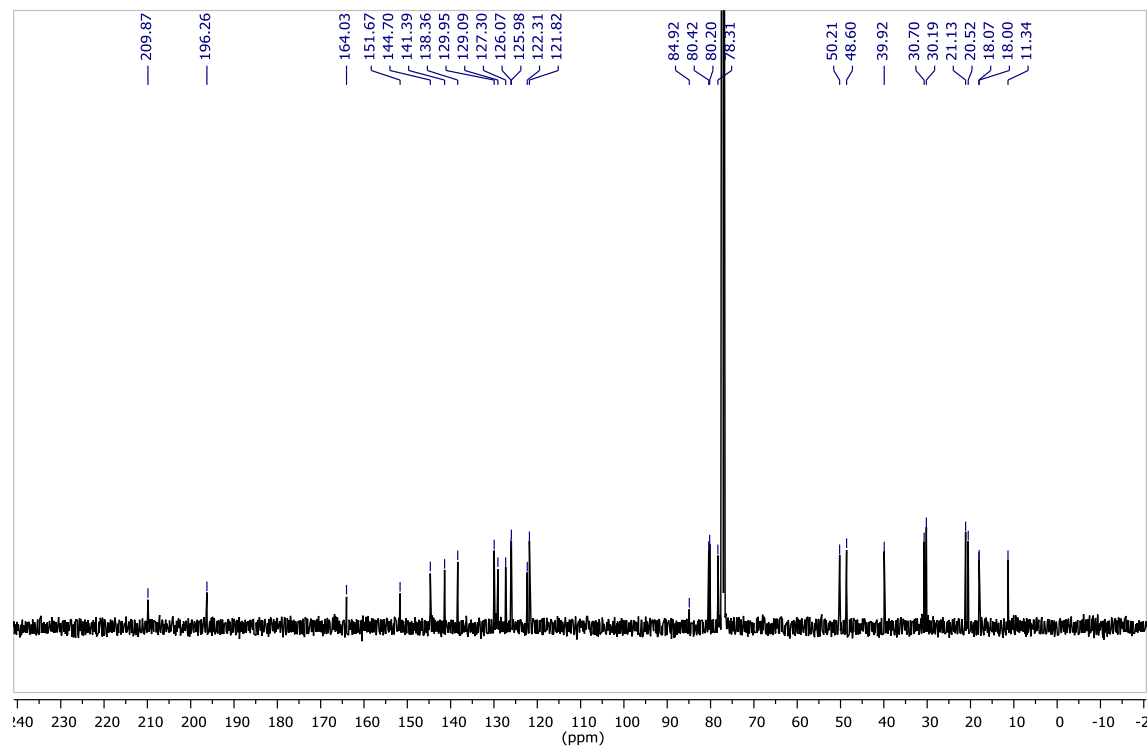

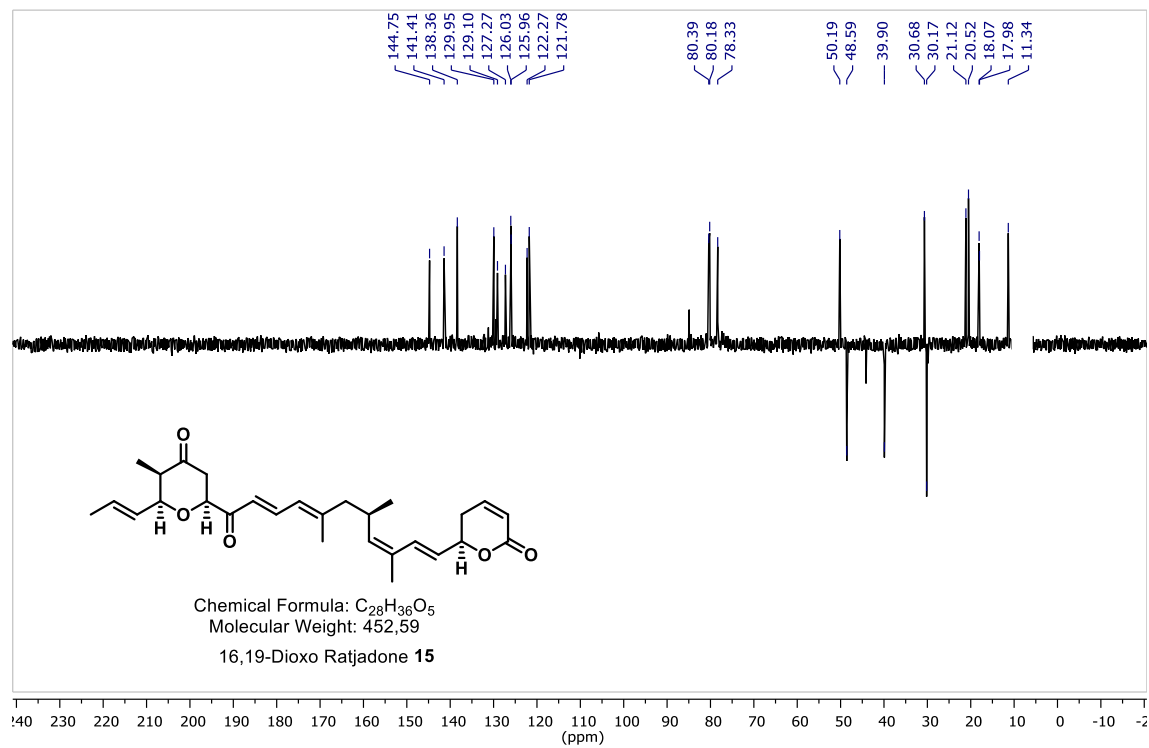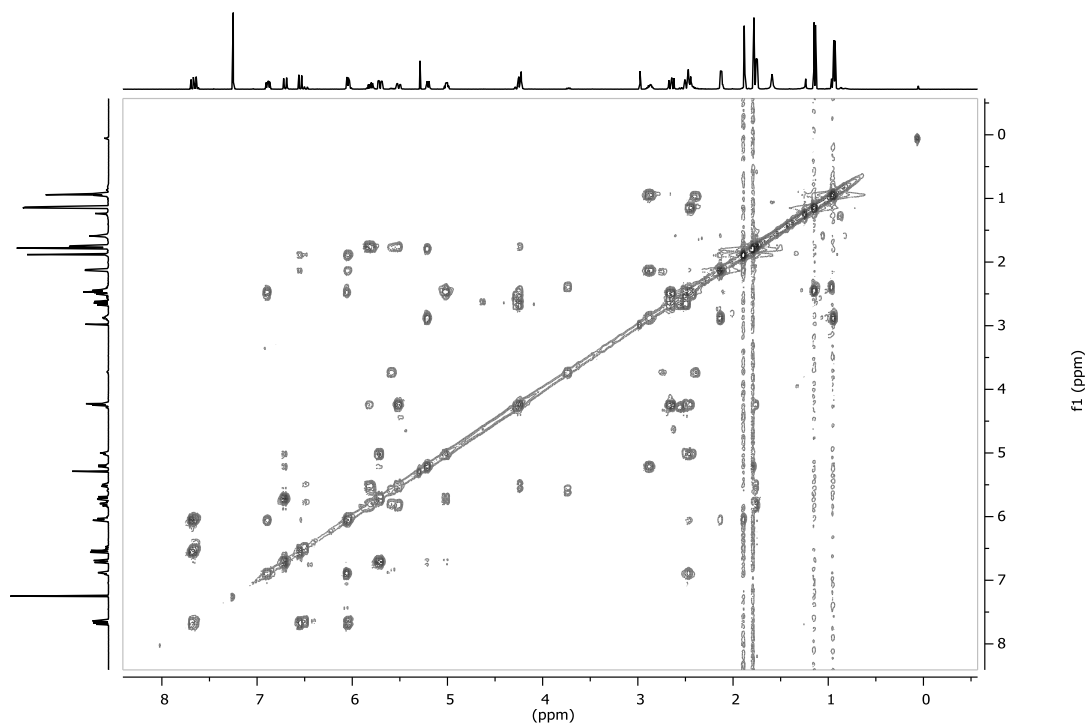



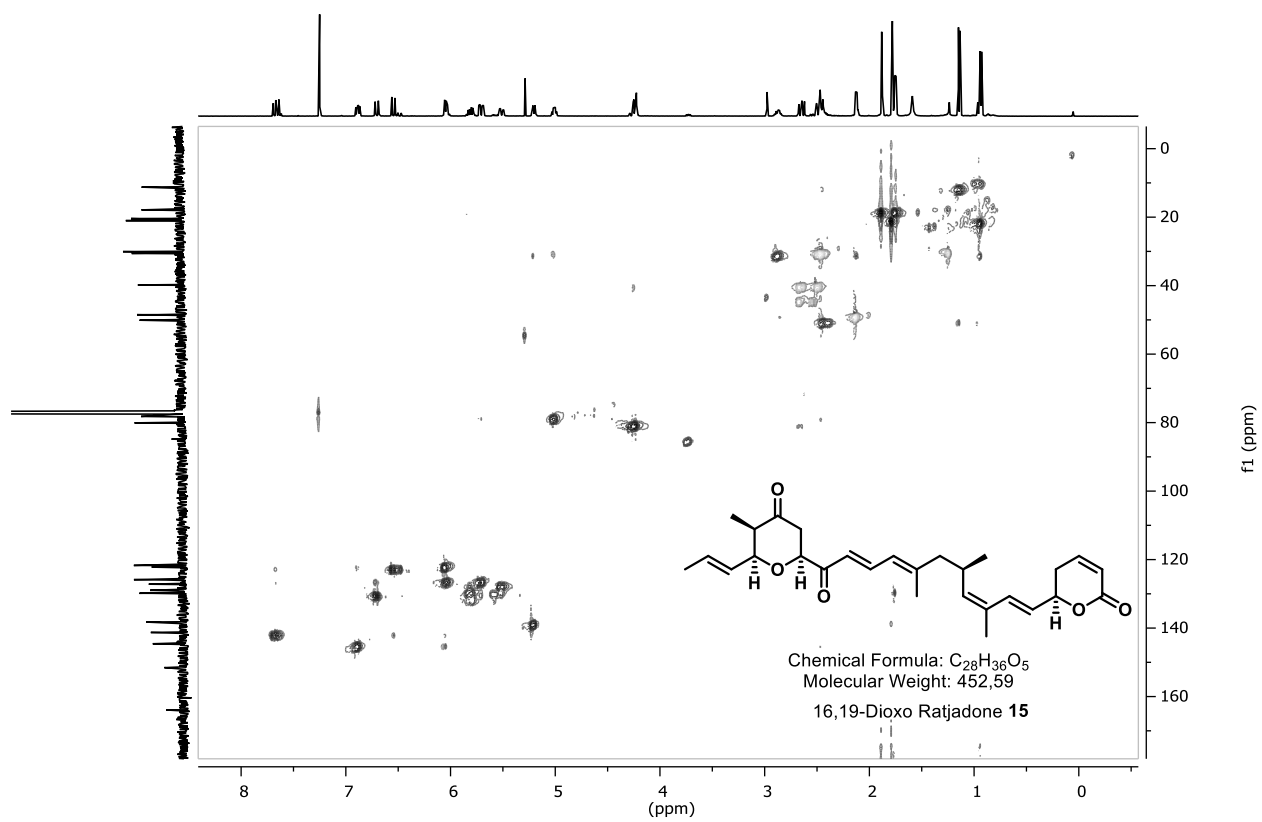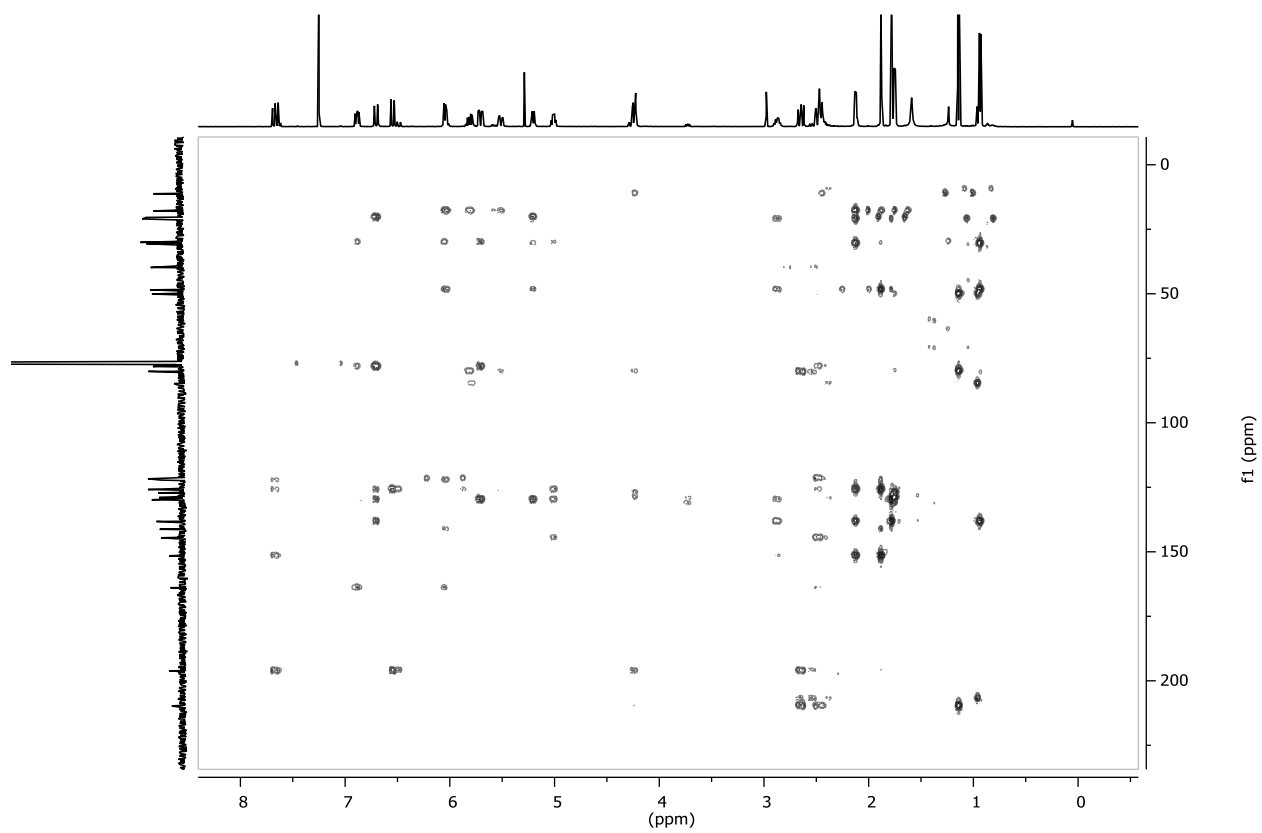

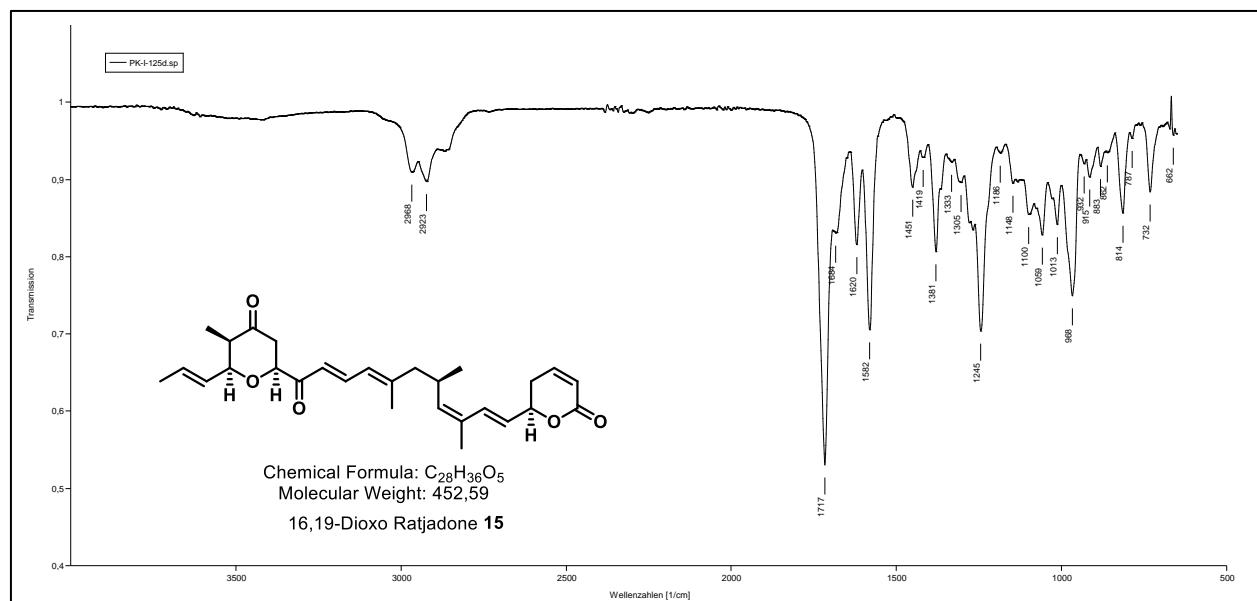

**16R-Amino-Ratjadone (16)** - (R)-6-((1E,3Z,5R,7E,9E,11R)-11-amino-11-((2S,4R,5S,6S)-4-hydroxy-5-methyl-6-((E)-prop-1-en-1-yl)tetrahydro-2H-pyran-2-yl)-3,5,7-trimethylundeca-1,3,7,9-tetra-en-1-yl)-5,6-dihydro-2H-pyran-2-one

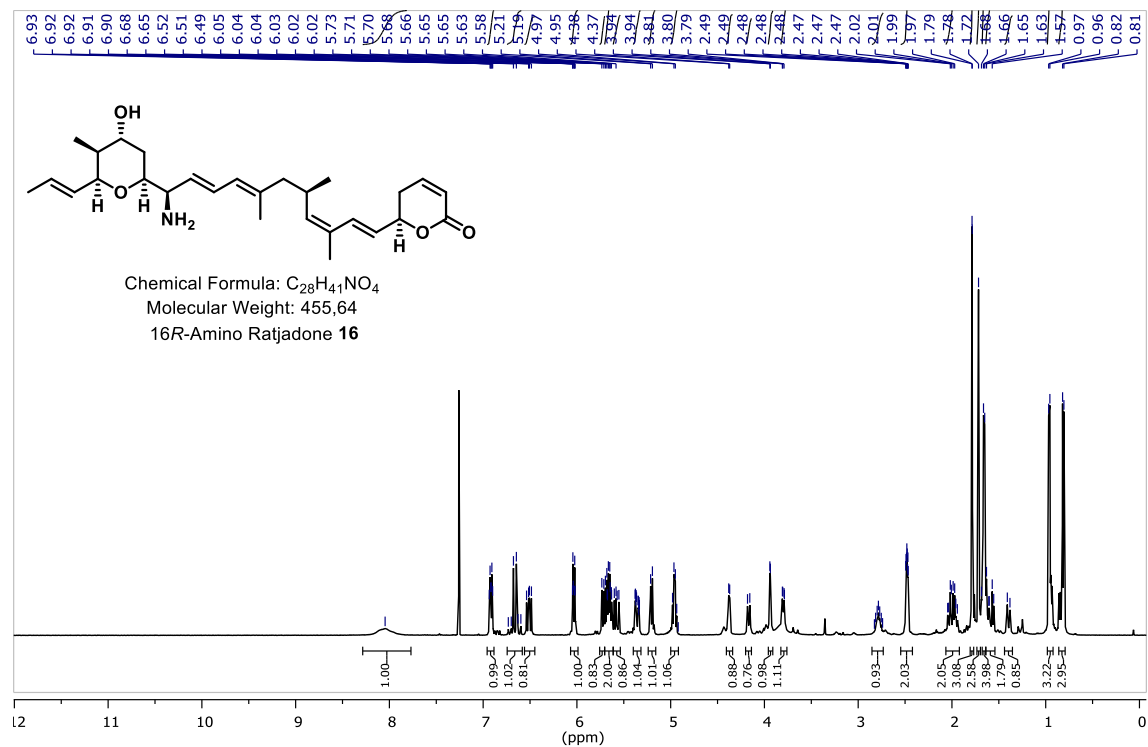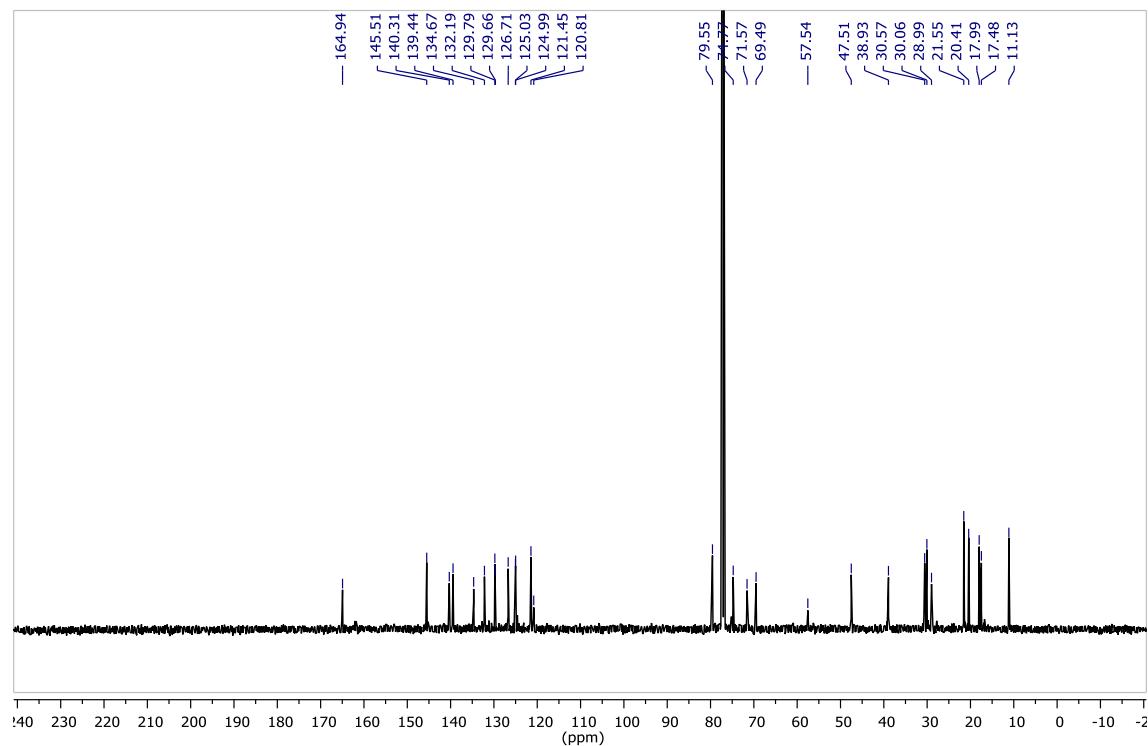

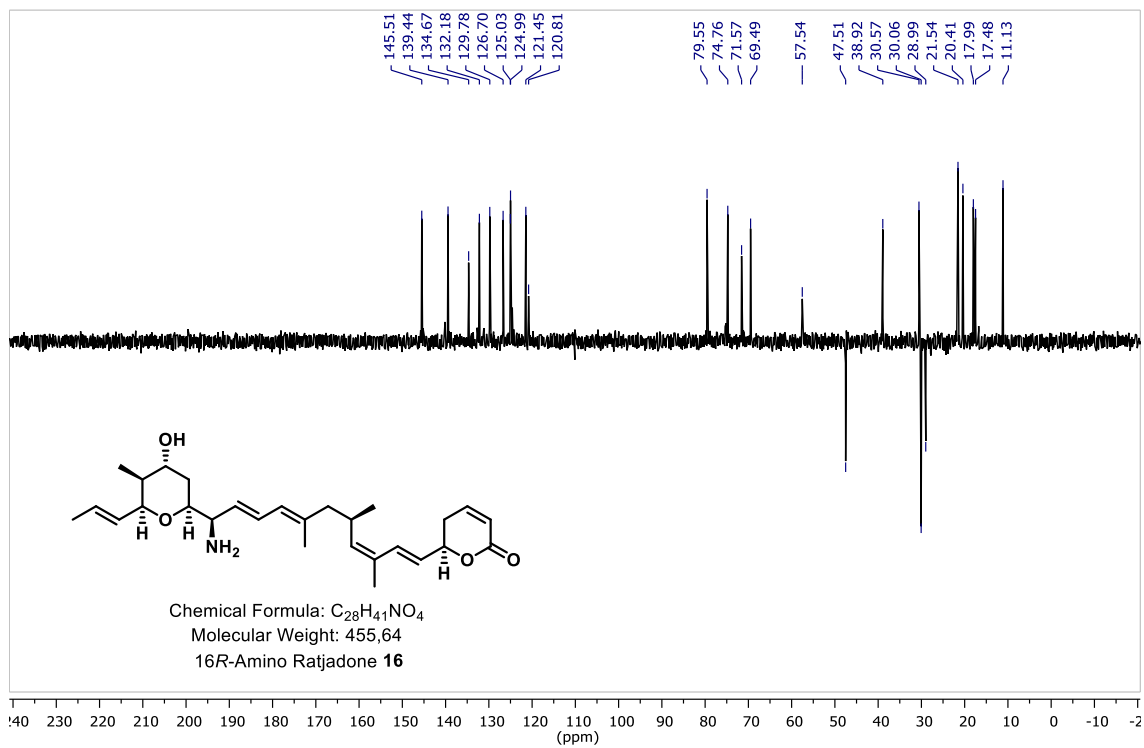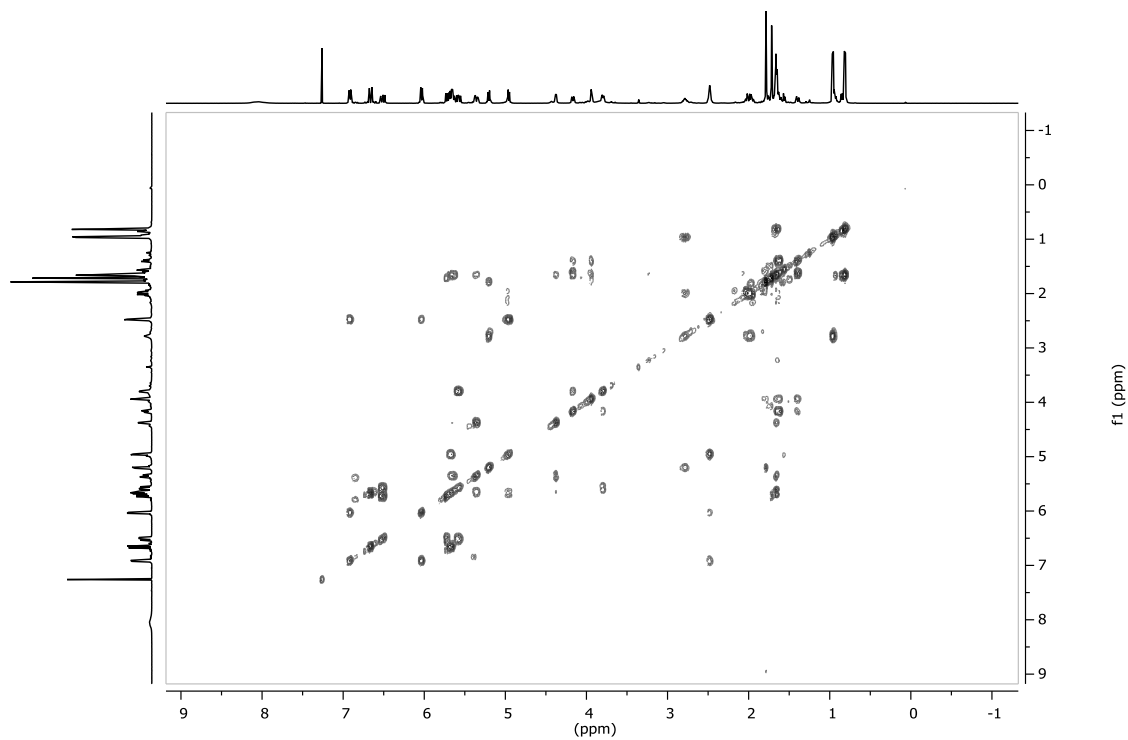

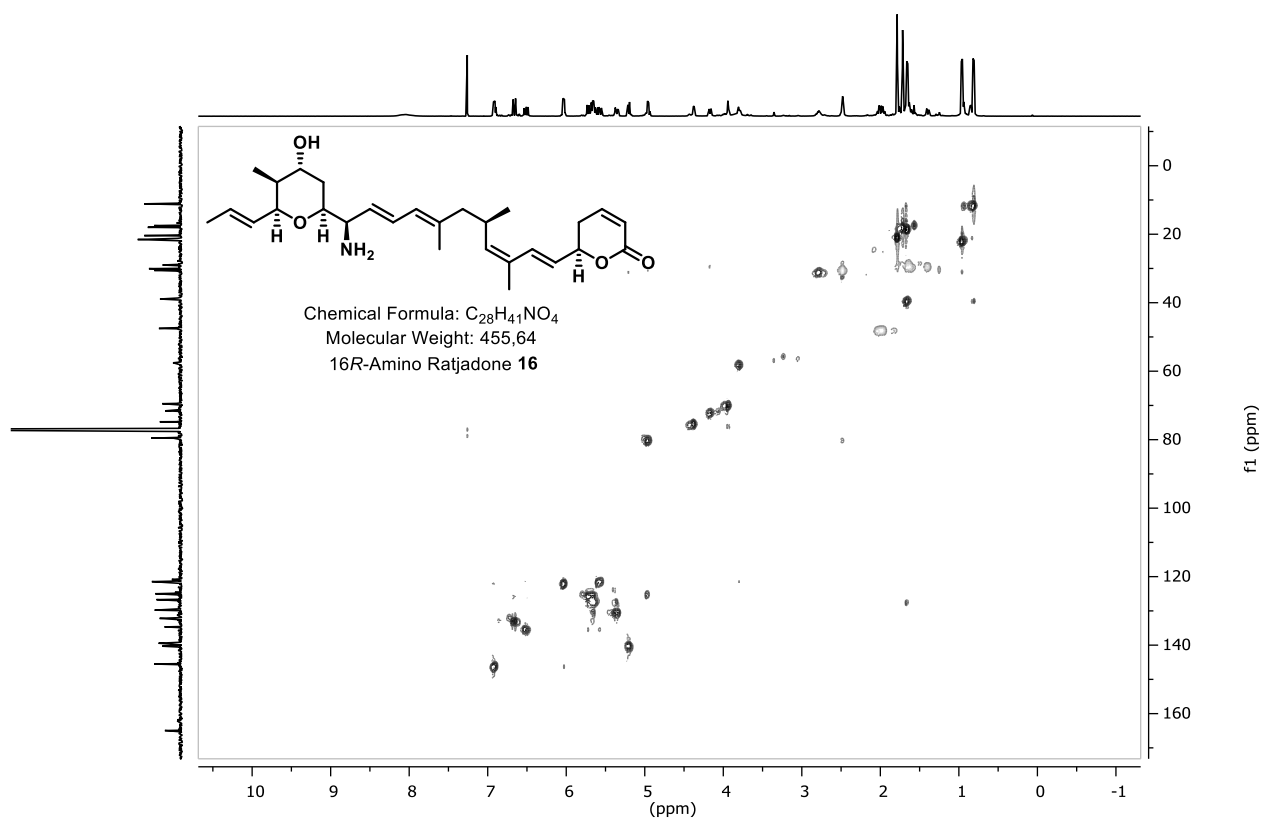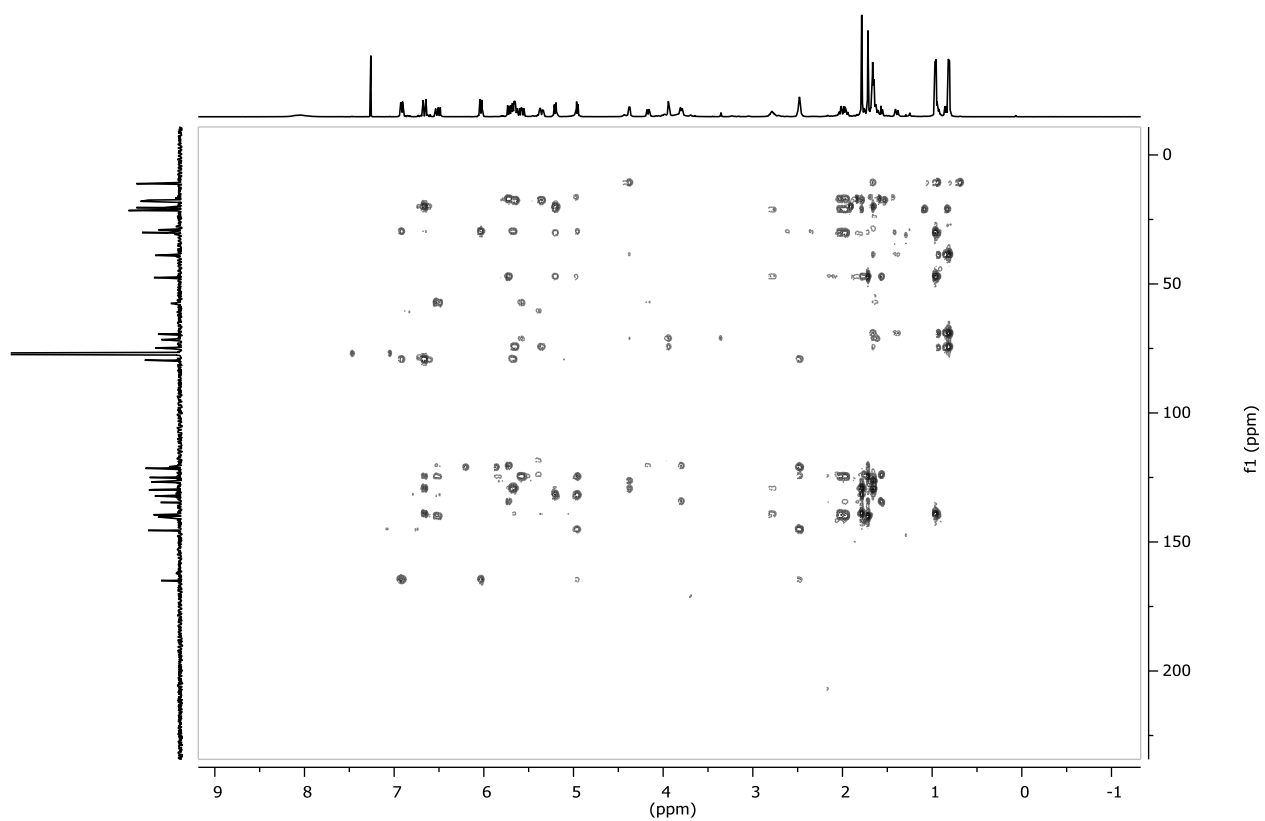

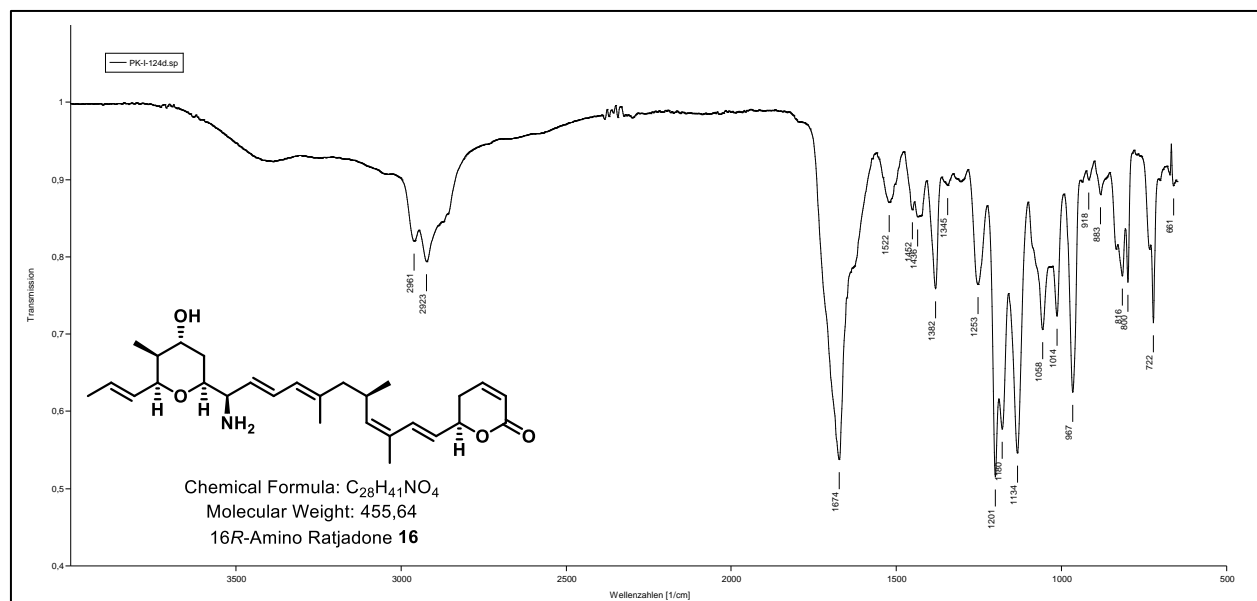

**16S-Amino-Ratjadone (17)** - (R)-6-((1E,3Z,5R,7E,9E,11S)-11-amino-11-((2S,4R,5S,6S)-4-hydroxy-5-methyl-6-((E)-prop-1-en-1-yl)tetrahydro-2H-pyran-2-yl)-3,5,7-trimethylun-deca-1,3,7,9-tetraen-1-yl)-5,6-dihydro-2H-pyran-2-one

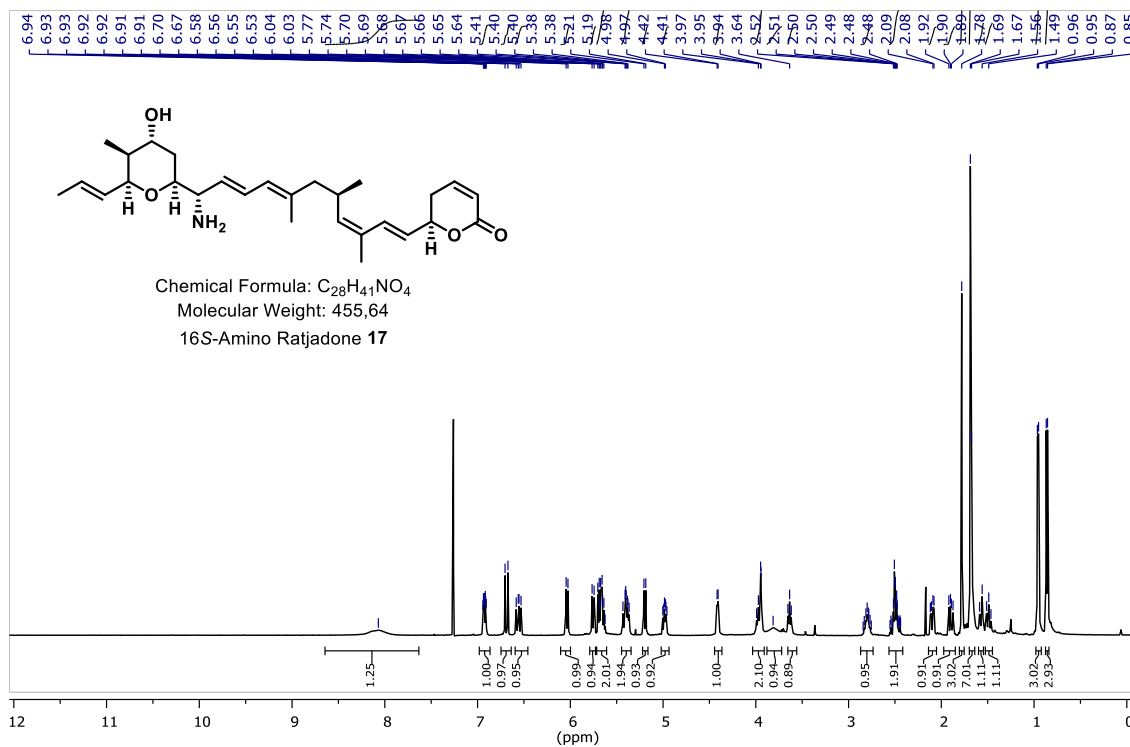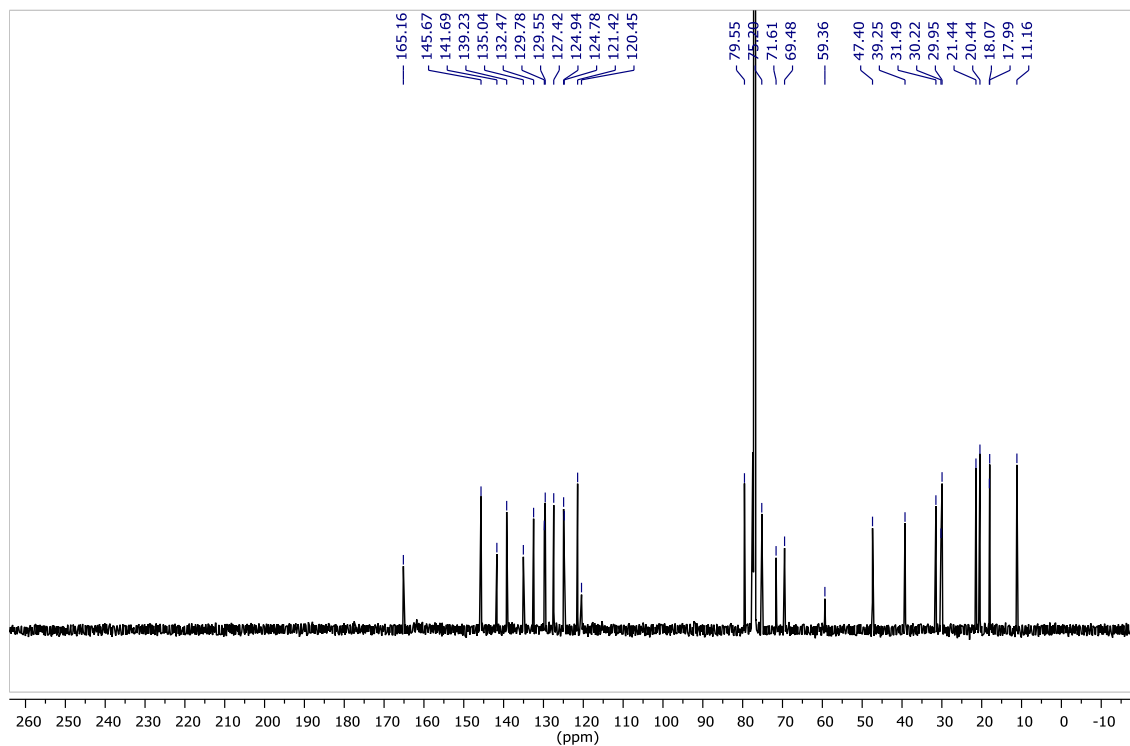

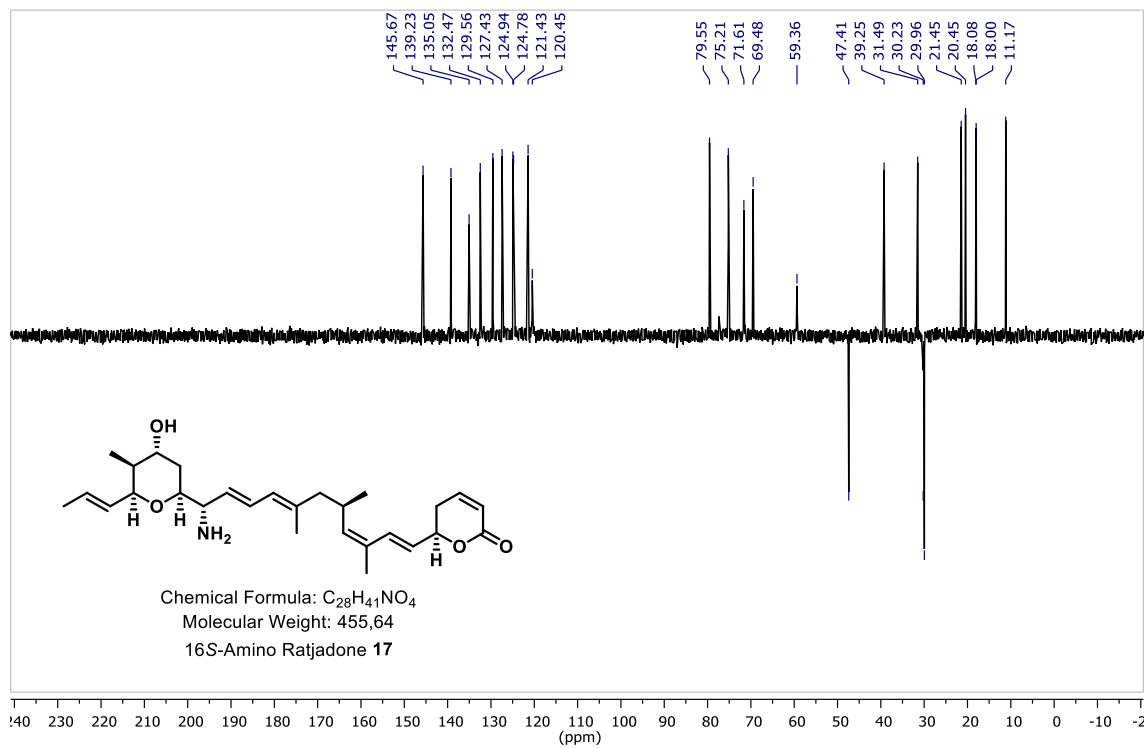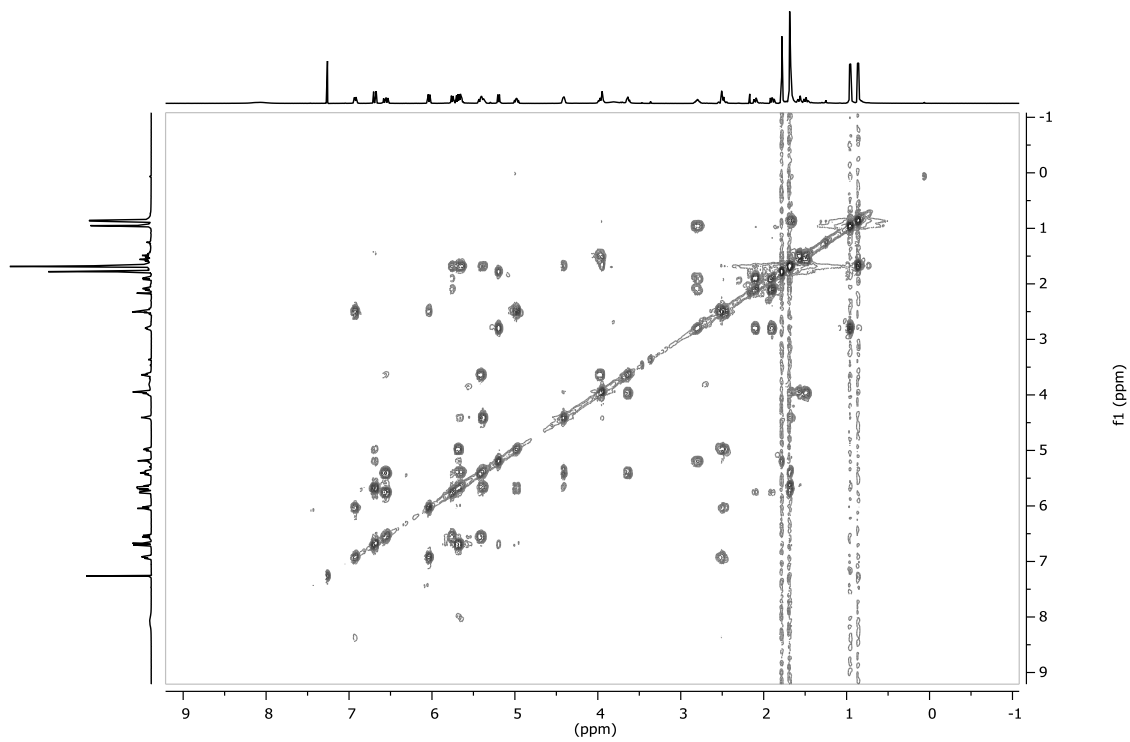



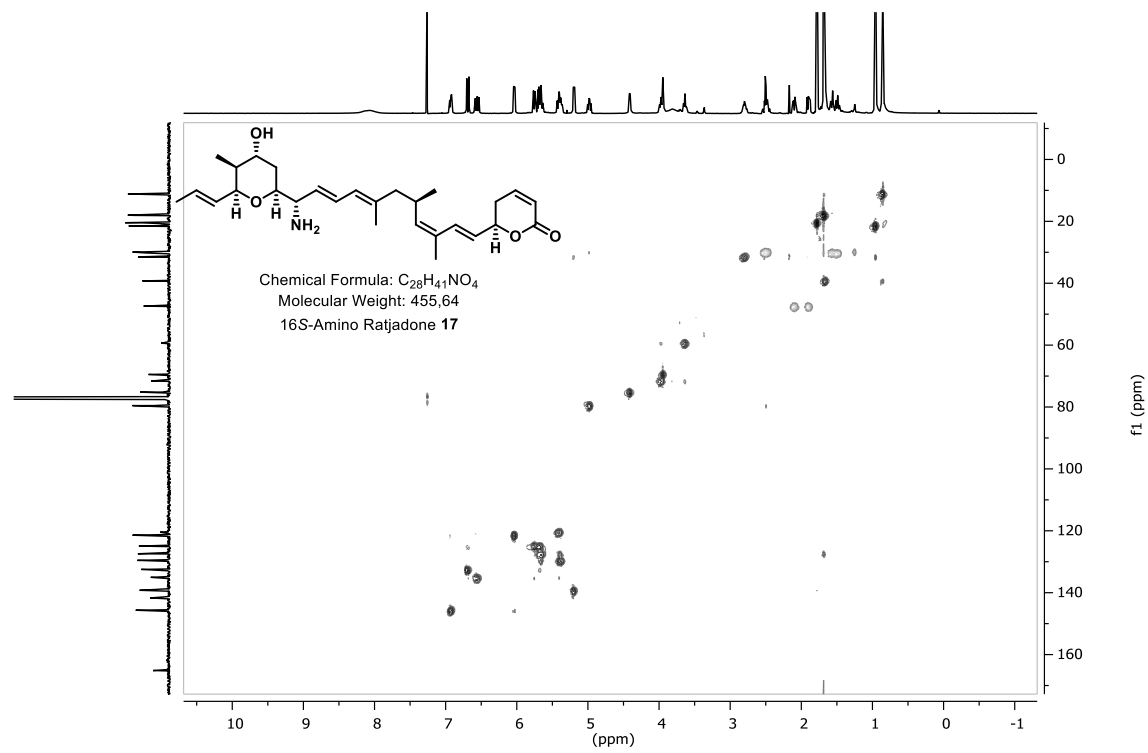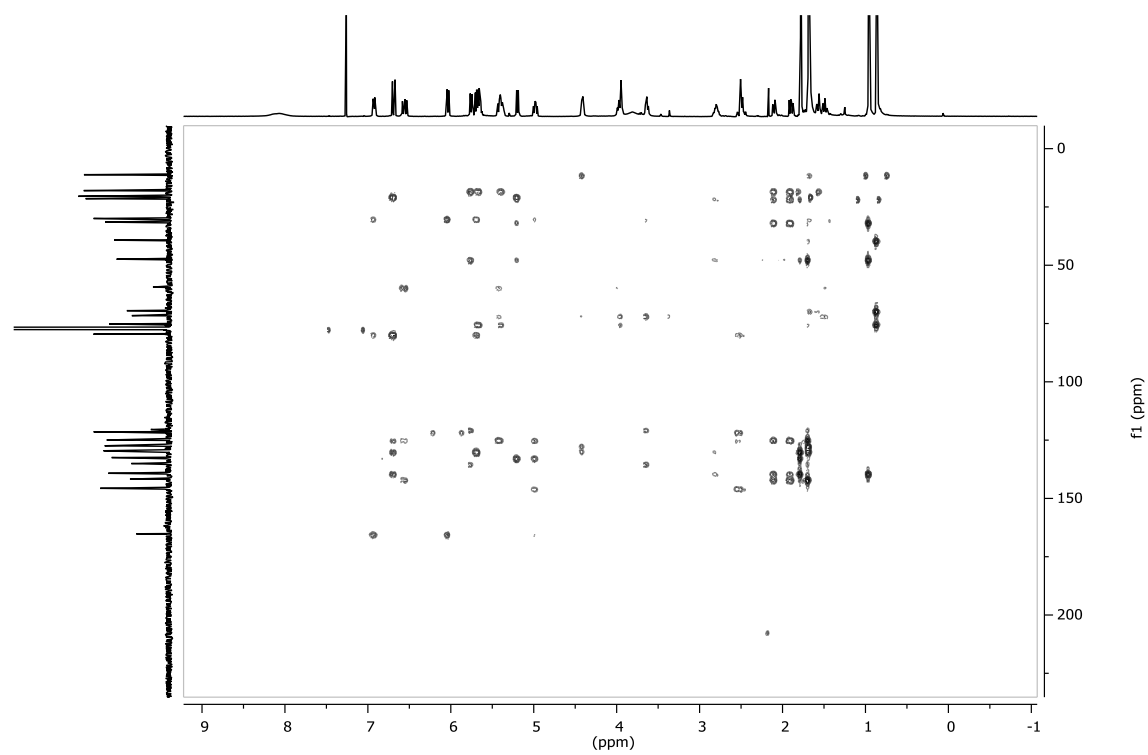

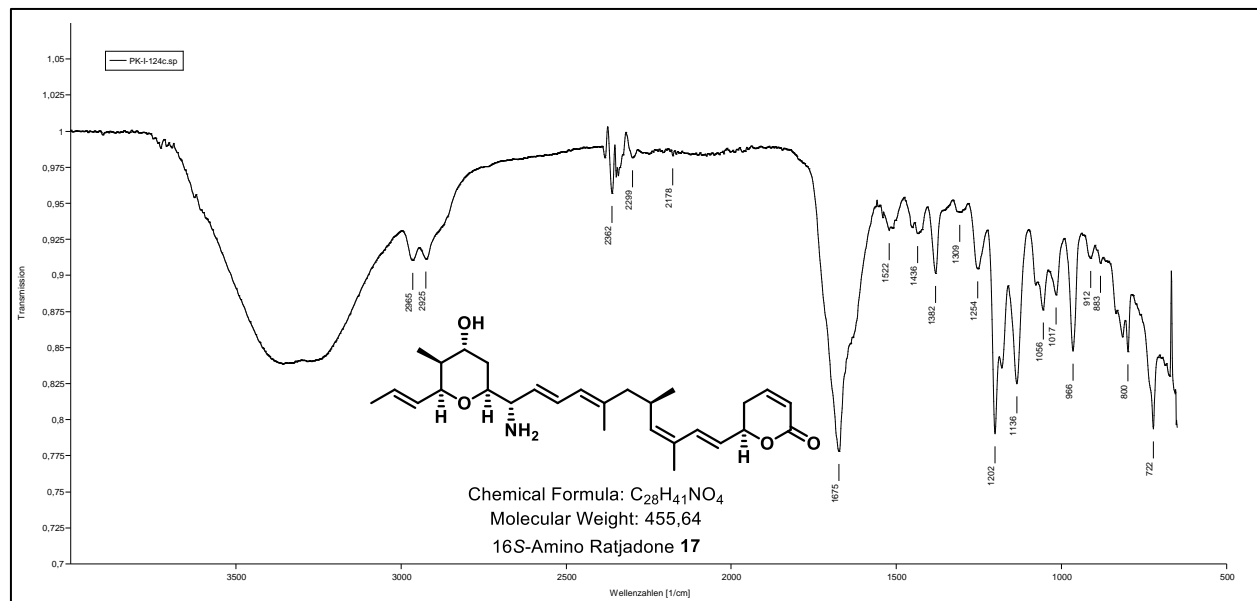

**Compound 18** - methyl (5R,6E,8Z,10R,12E,14E,16R)-3,16-diamino-5-hydroxy-16-((2S,4R,5S,6S)-4-hydroxy-5-methyl-6-((E)-prop-1-en-1-yl)tetrahydro-2H-pyran-2-yl)-8,10,12-trimethylhexadeca-6,8,12,14-tetraenoate

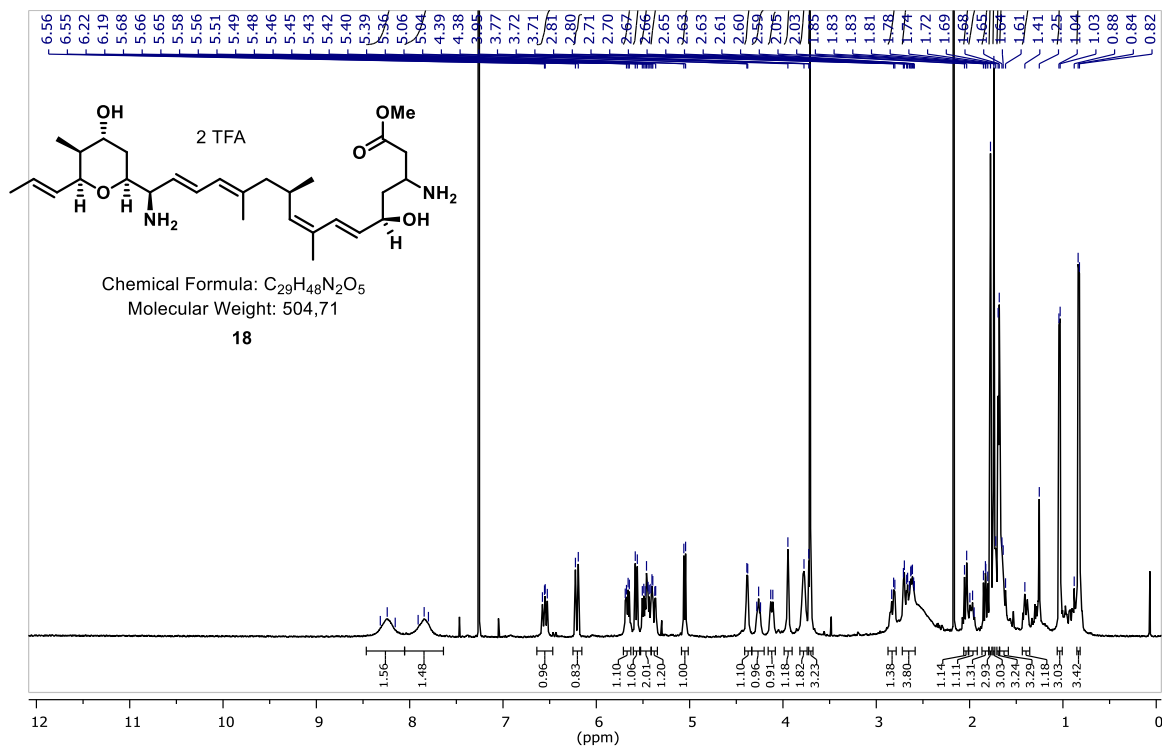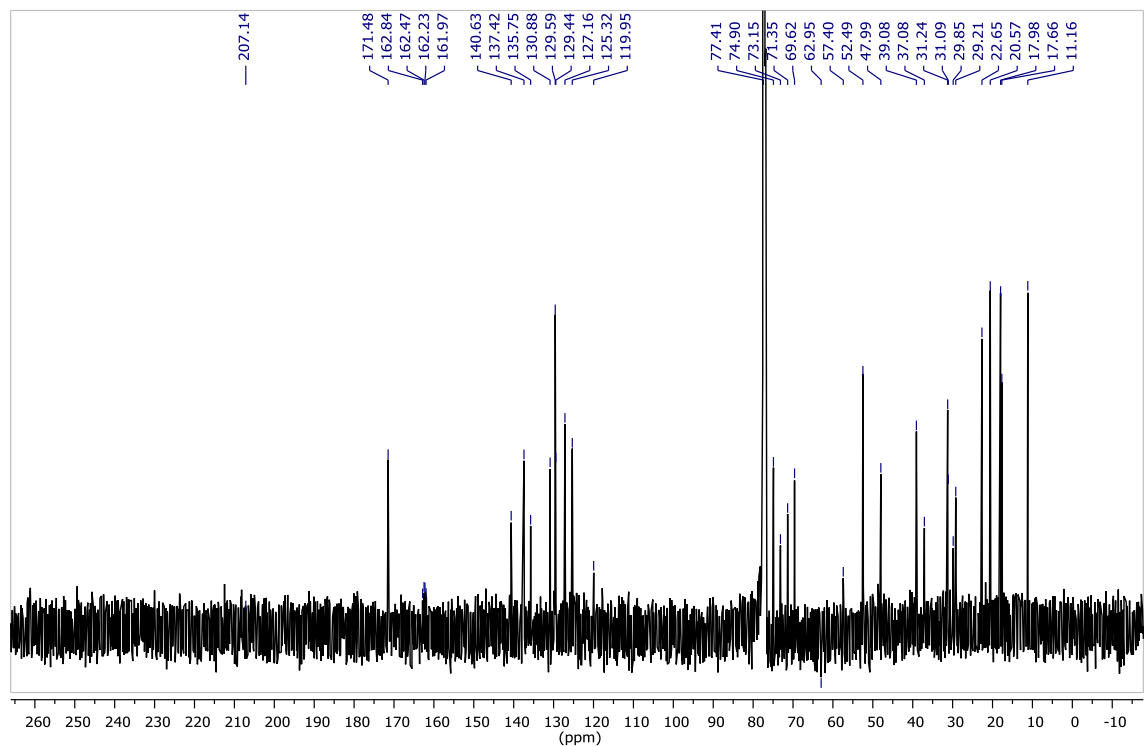

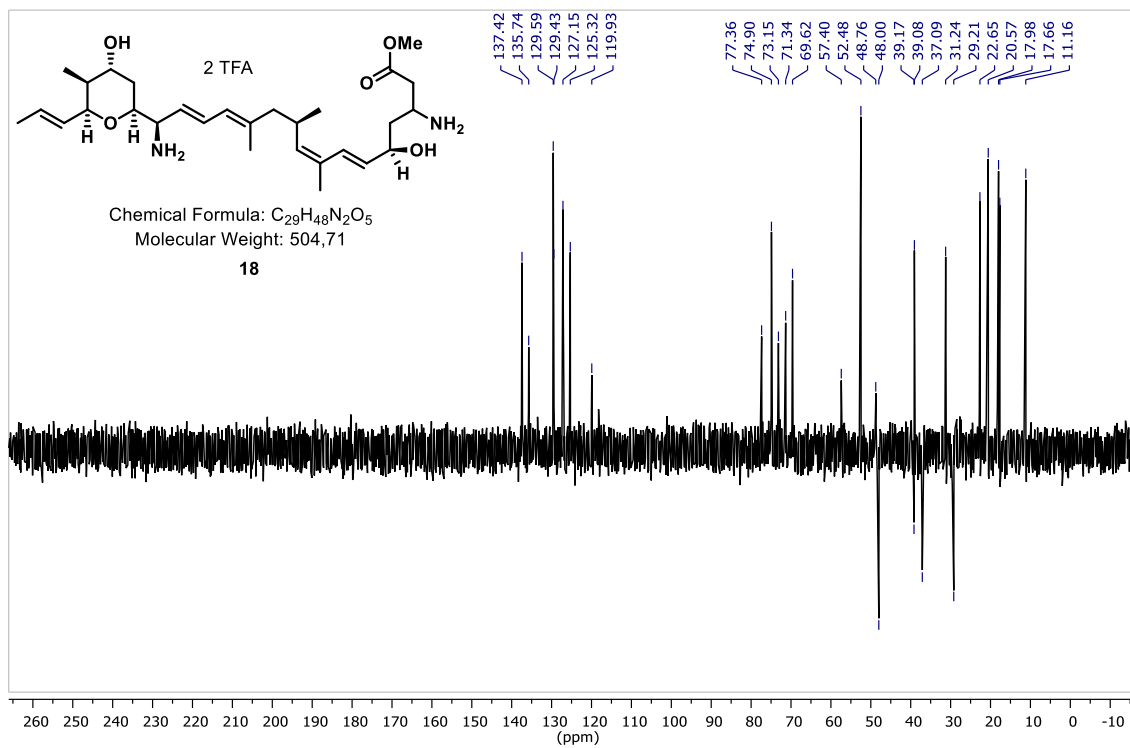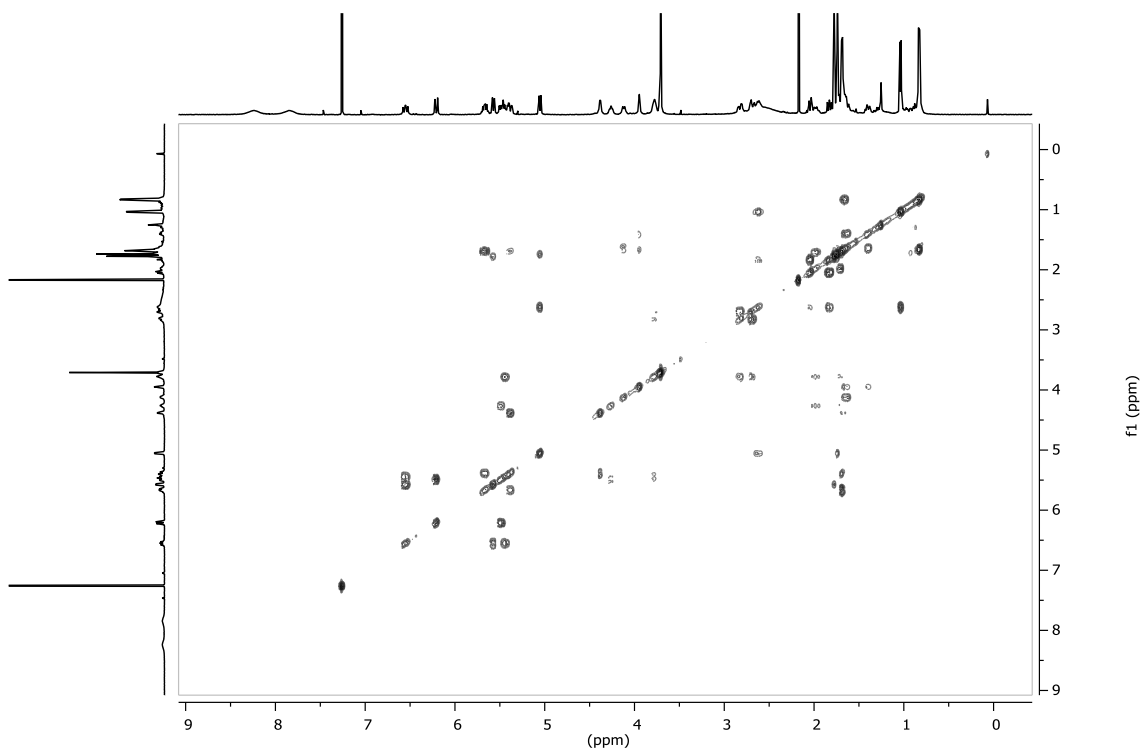

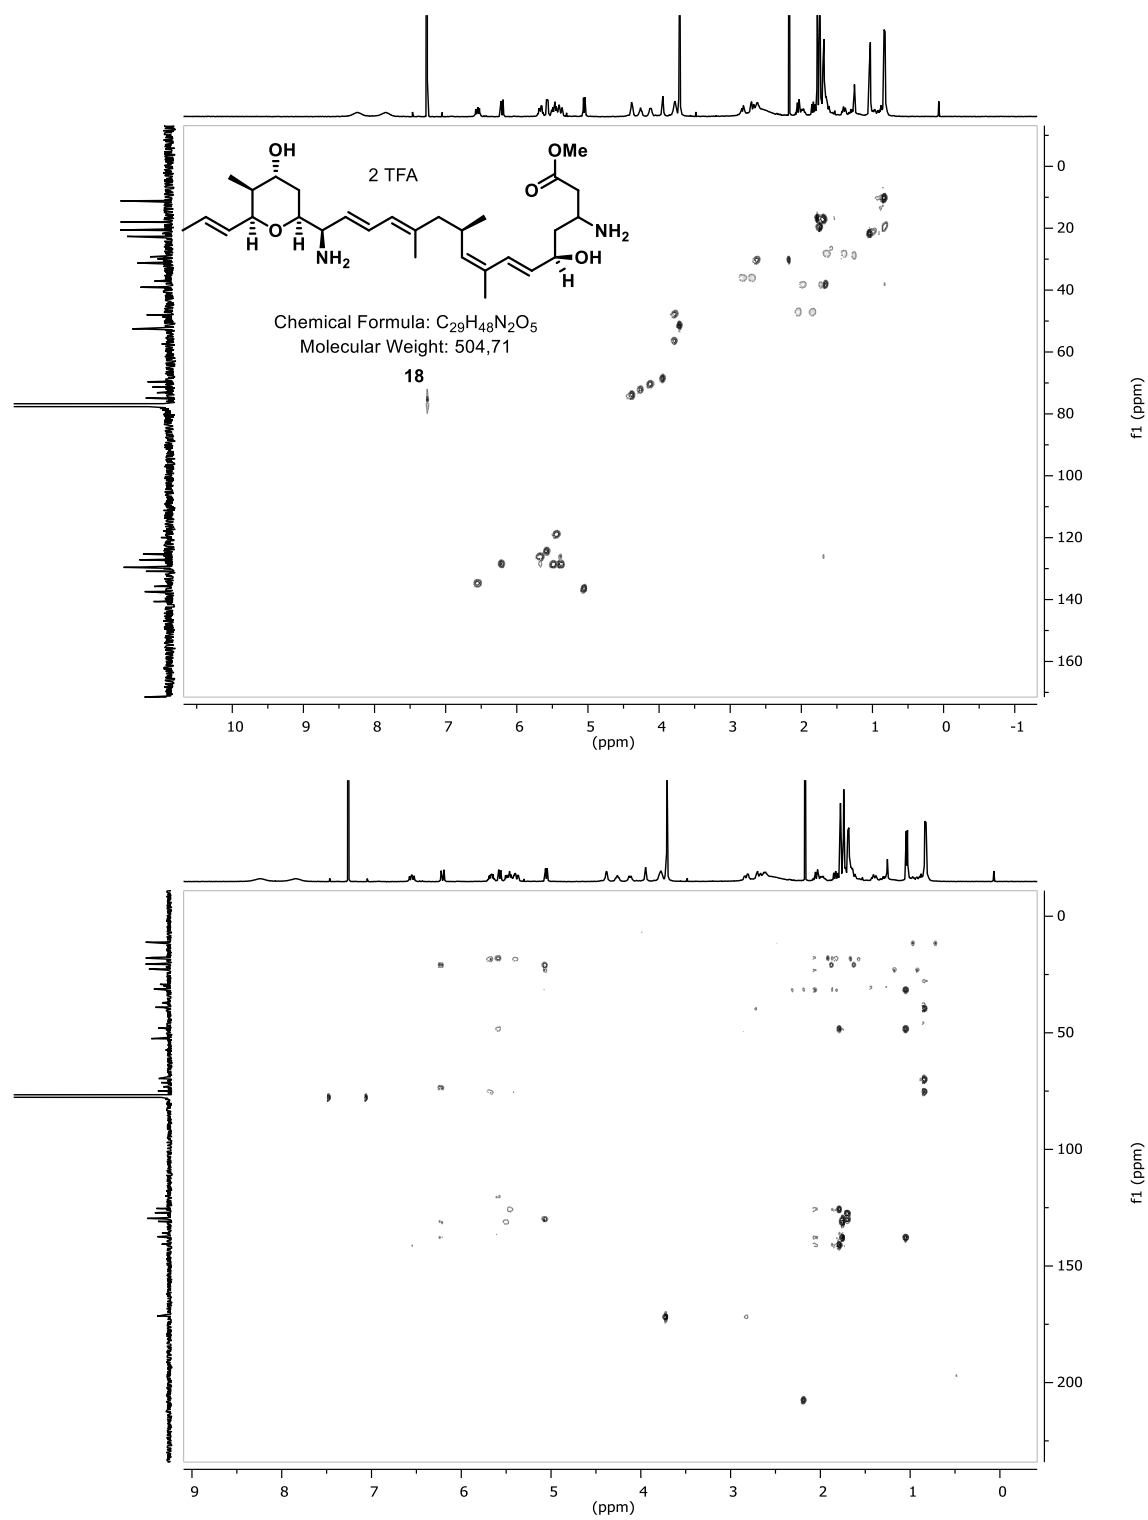

**Compound 19** – methyl (5R,6E,8Z,10R,12E,14E,16S)-3,16-diamino-5-hydroxy-16-((2S,4R,5S,6S)-4-hydroxy-5-methyl-6-((E)-prop-1-en-1-yl)tetrahydro-2H-pyran-2-yl)-8,10,12-trimethylhexadeca-6,8,12,14-tetraenoate

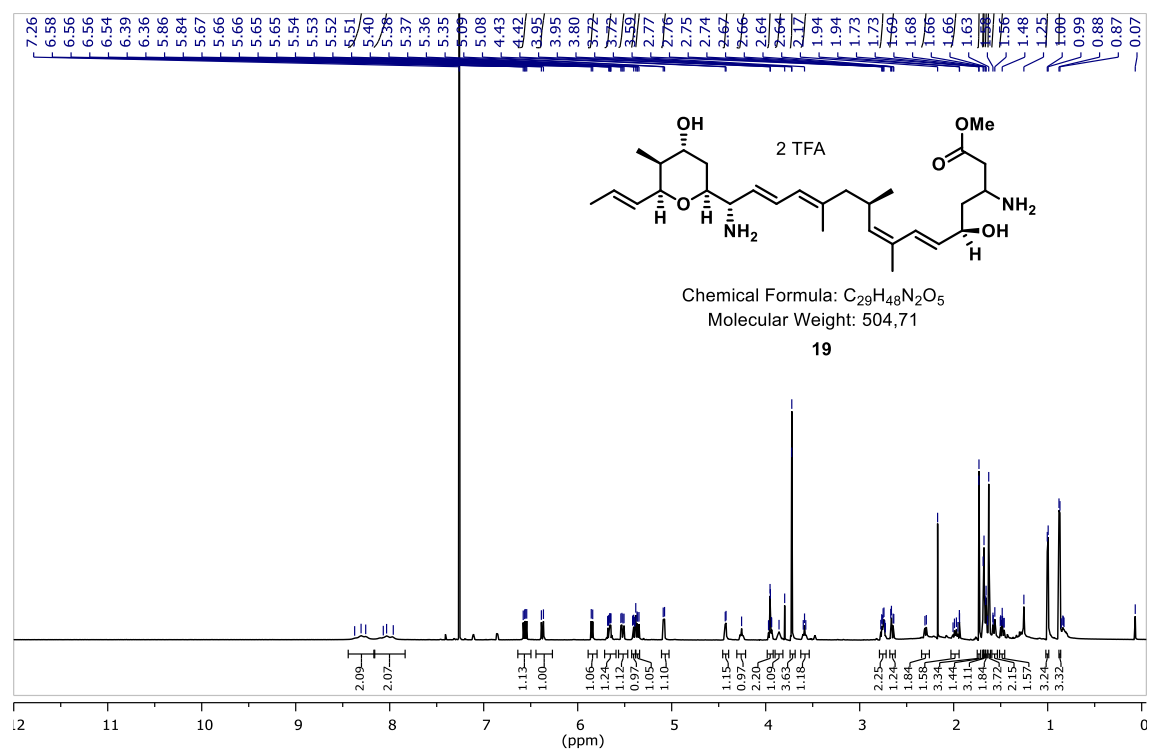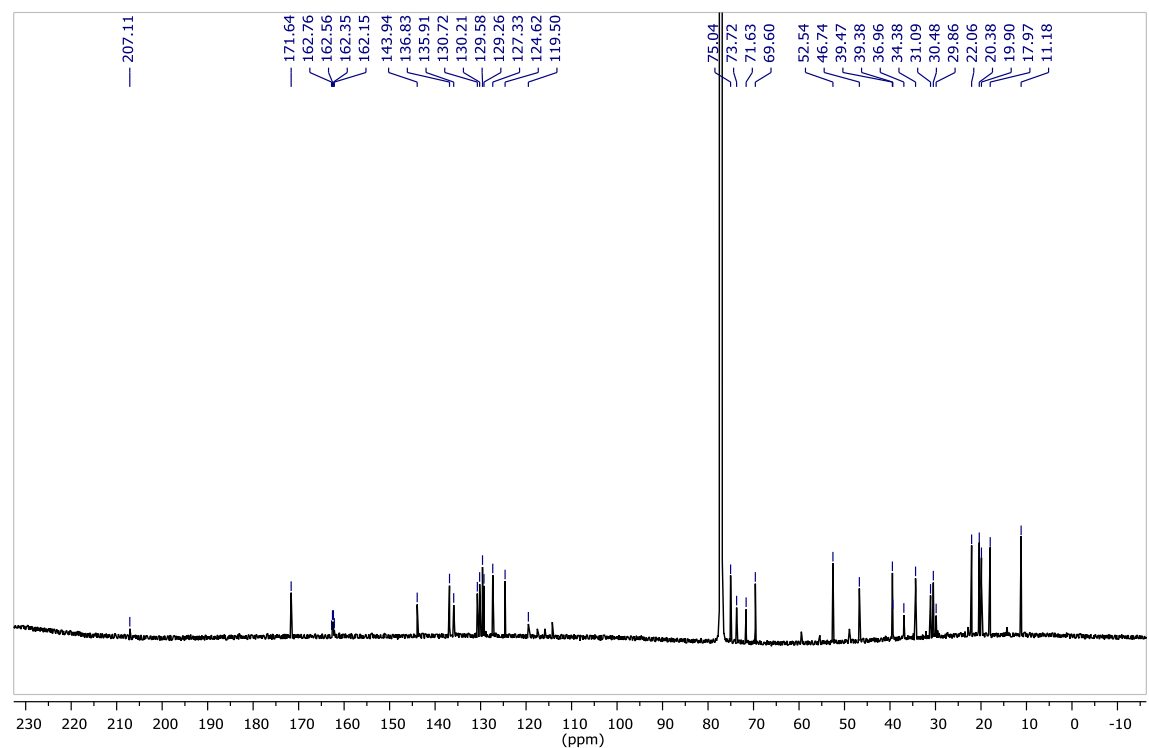

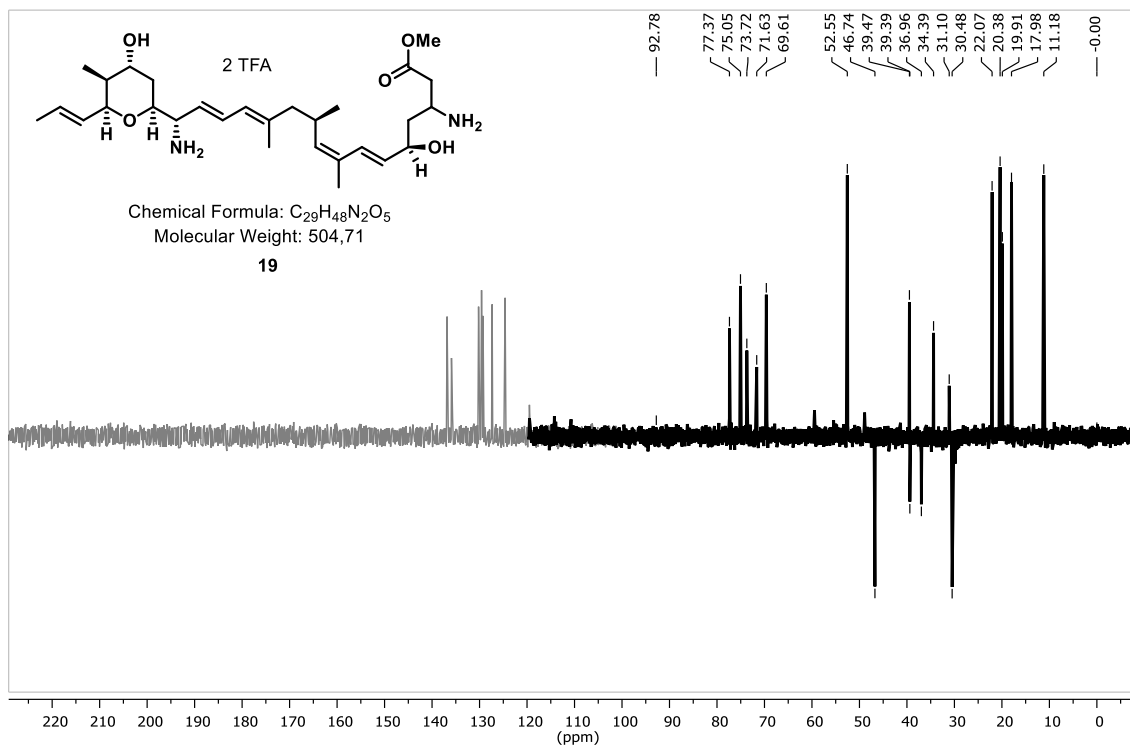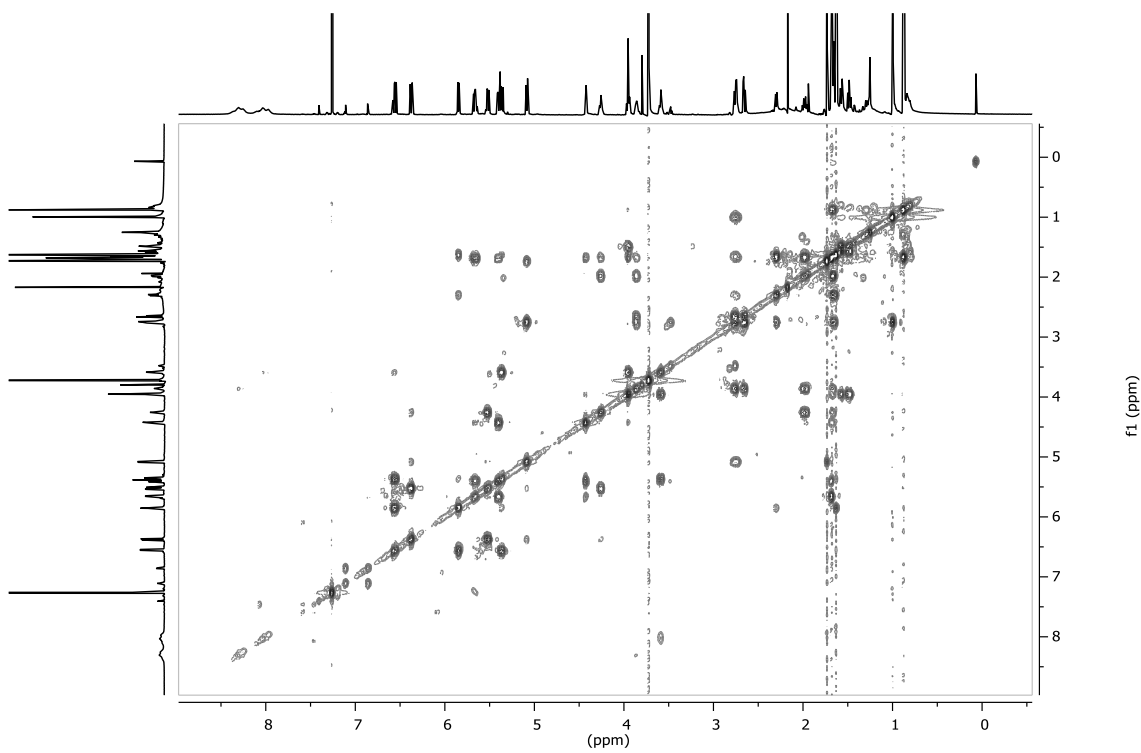

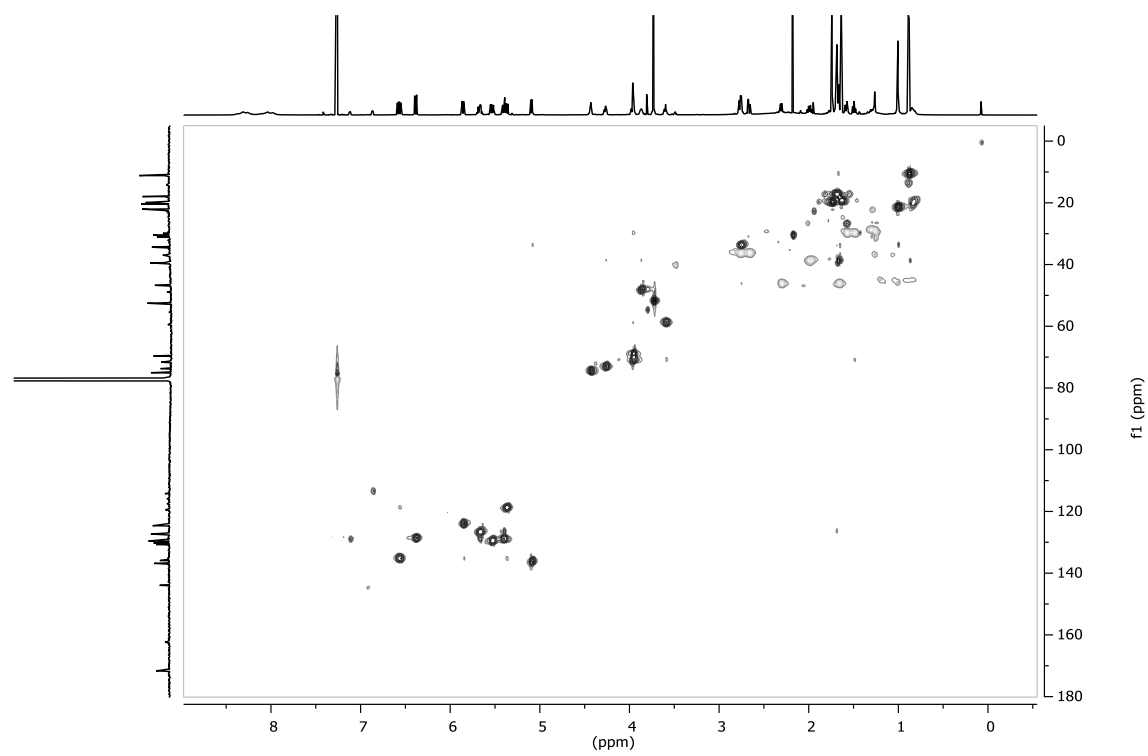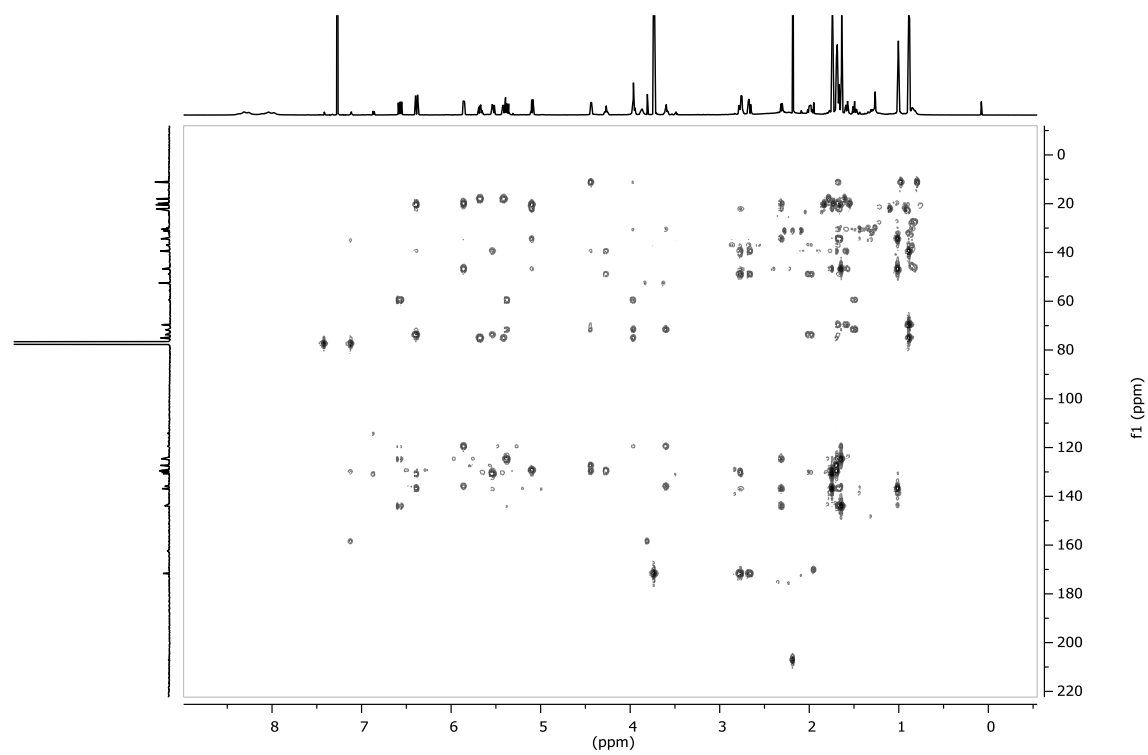



**16-R-Mosher** - (R)-3,3,3-trifluoro-N-((1R,2E,4E,7R,8Z,10E)-1-((2S,4R,5S,6S)-4-hydroxy-5-methyl-6-((E)-prop-1-en-1-yl)tetrahydro-2H-pyran-2-yl)-5,7,9-trimethyl-11-((R)-6-oxo-3,6-dihydro-2H-pyran-2-yl)undeca-2,4,8,10-tetraen-1-yl)-2-methoxy-2-phenylpropanamide

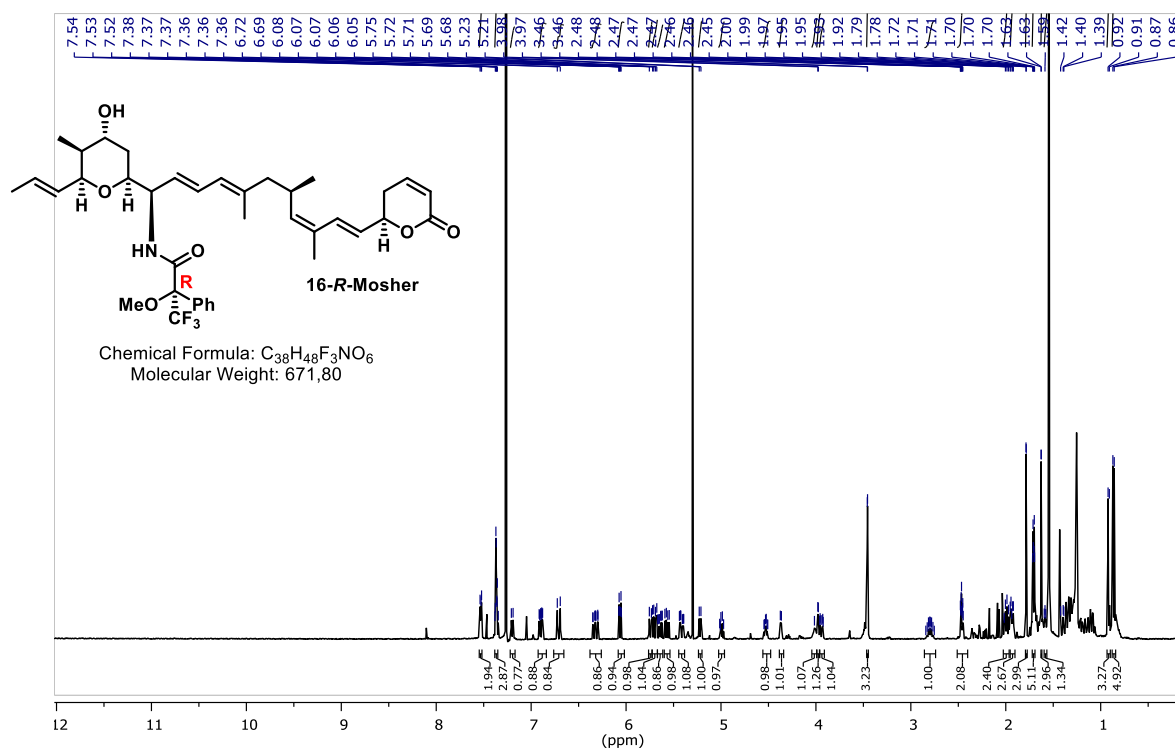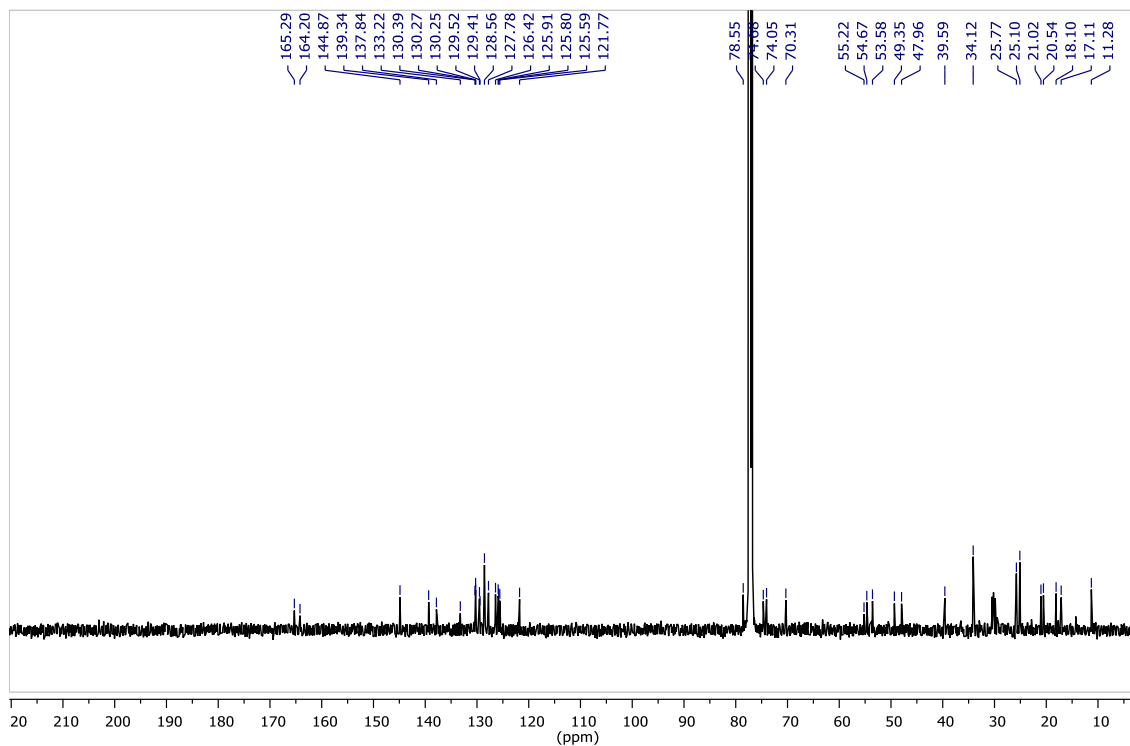

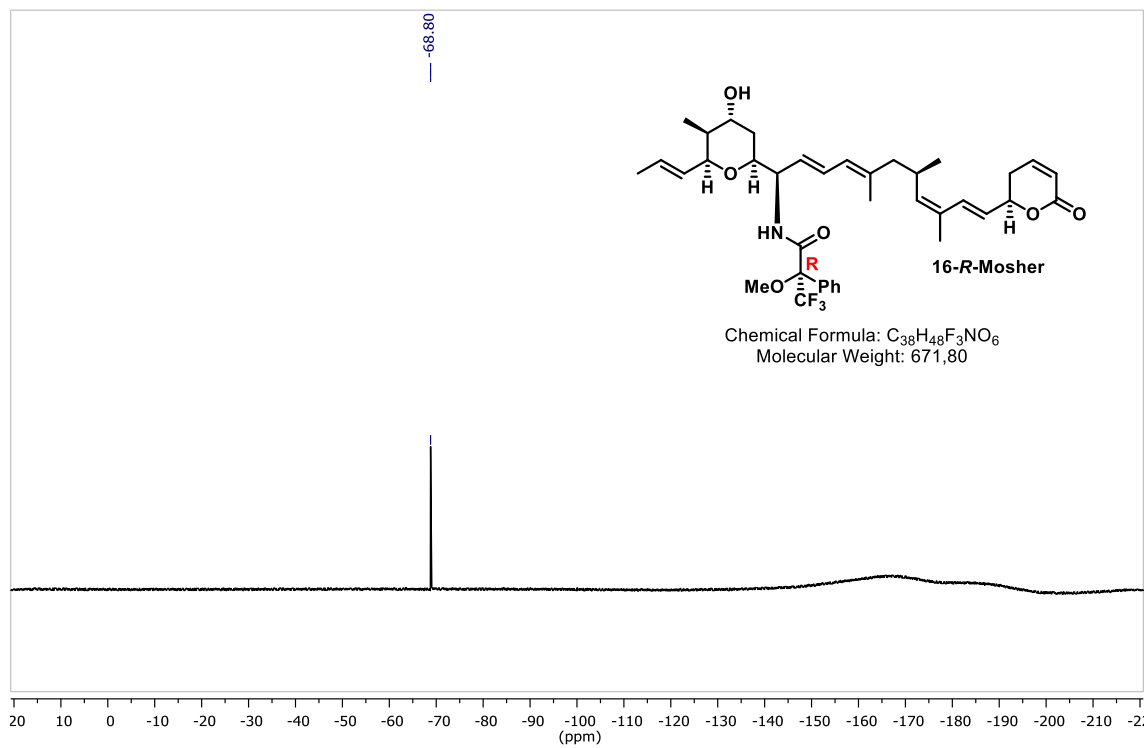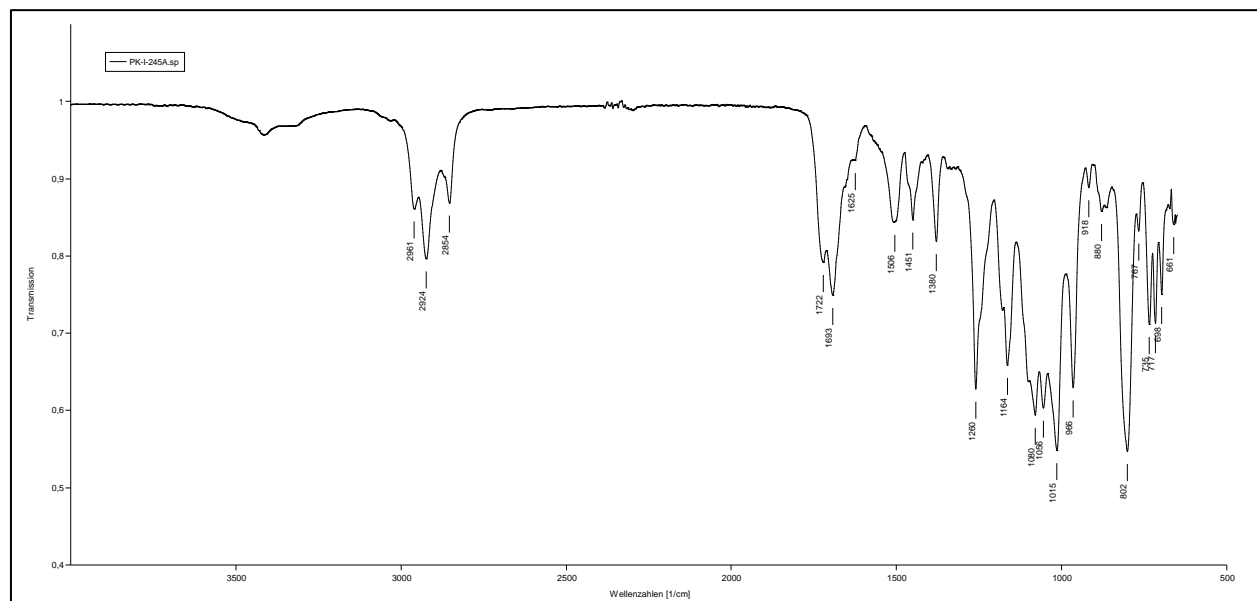

**17-R-Mosher** - (S)-3,3,3-trifluoro-N-((1R,2E,4E,7R,8Z,10E)-1-((2S,4R,5S,6S)-4-hydroxy-5-methyl-6-((E)-prop-1-en-1-yl)tetrahydro-2H-pyran-2-yl)-5,7,9-trimethyl-11-((R)-6-oxo-3,6-dihydro-2H-pyran-2-yl)undeca-2,4,8,10-tetraen-1-yl)-2-methoxy-2-phenylpropanamide

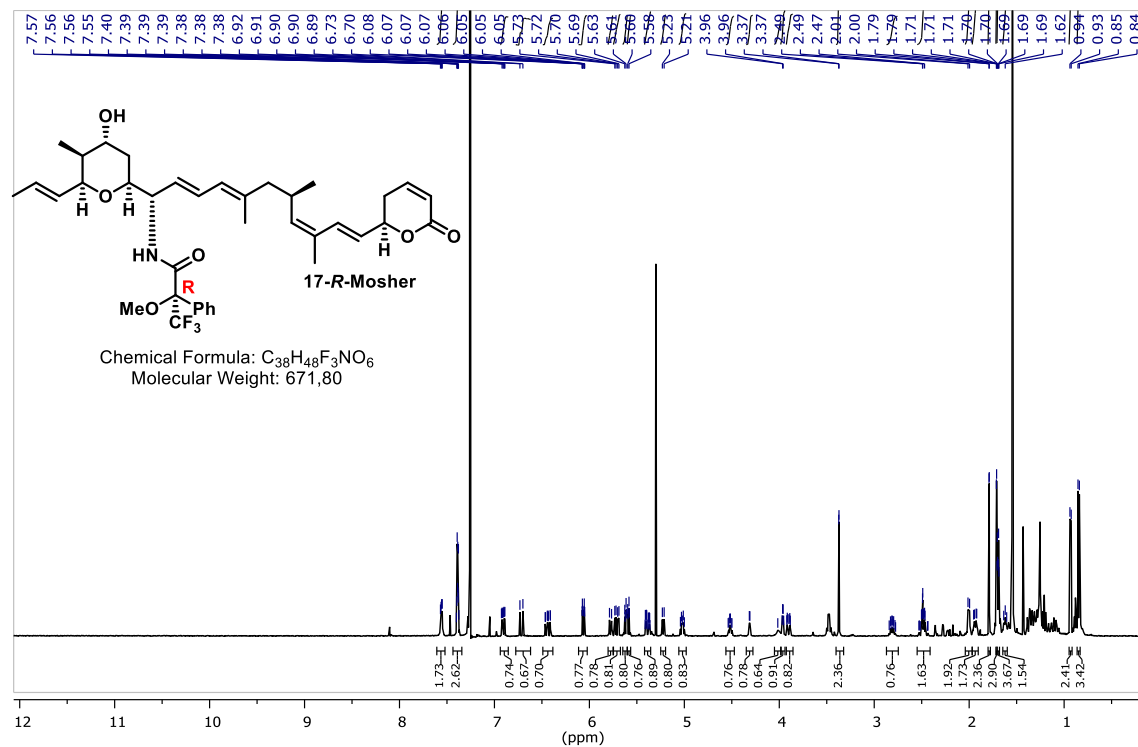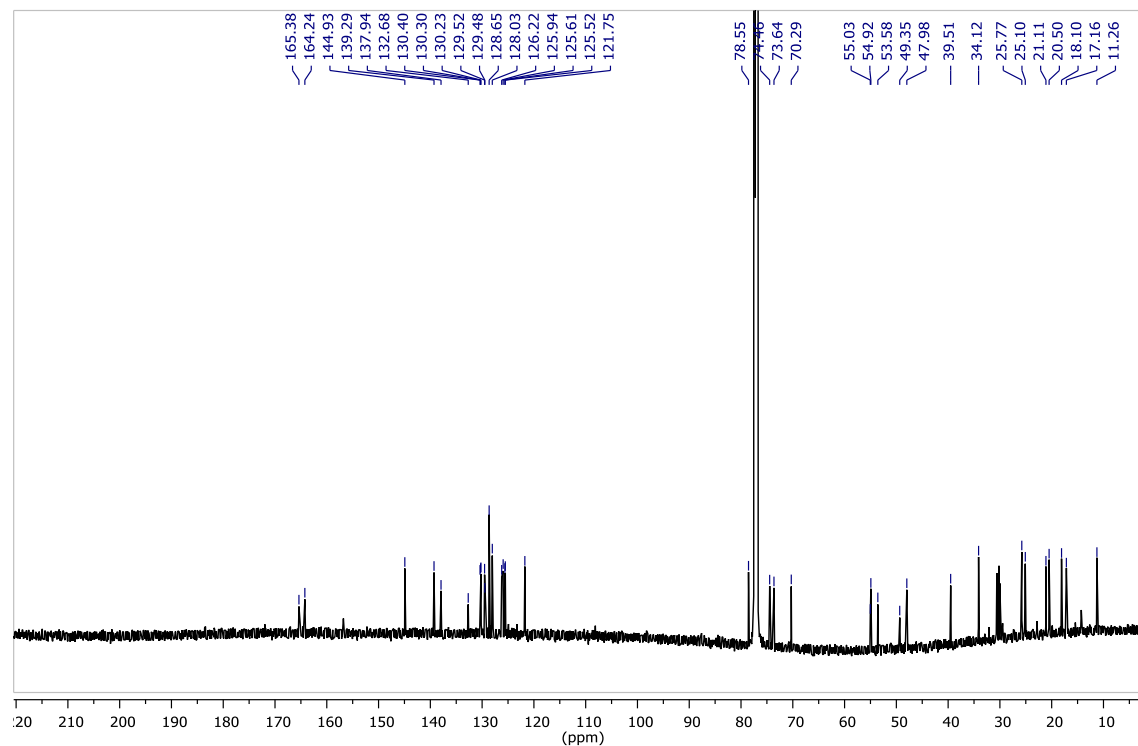

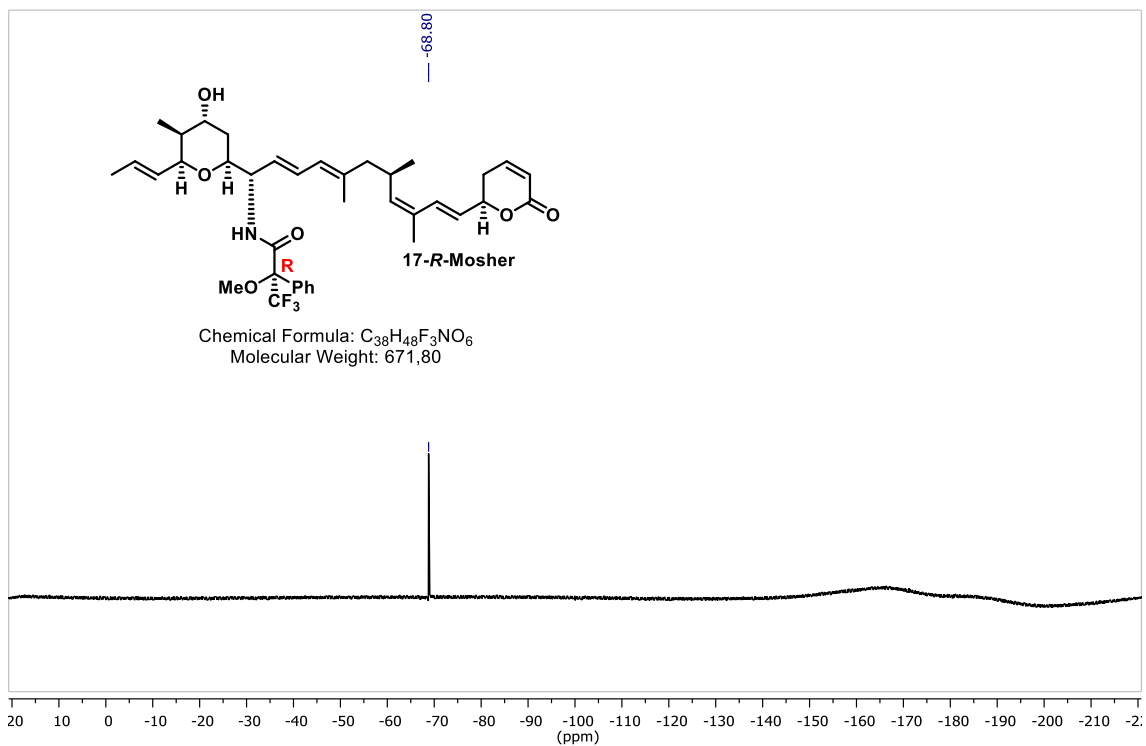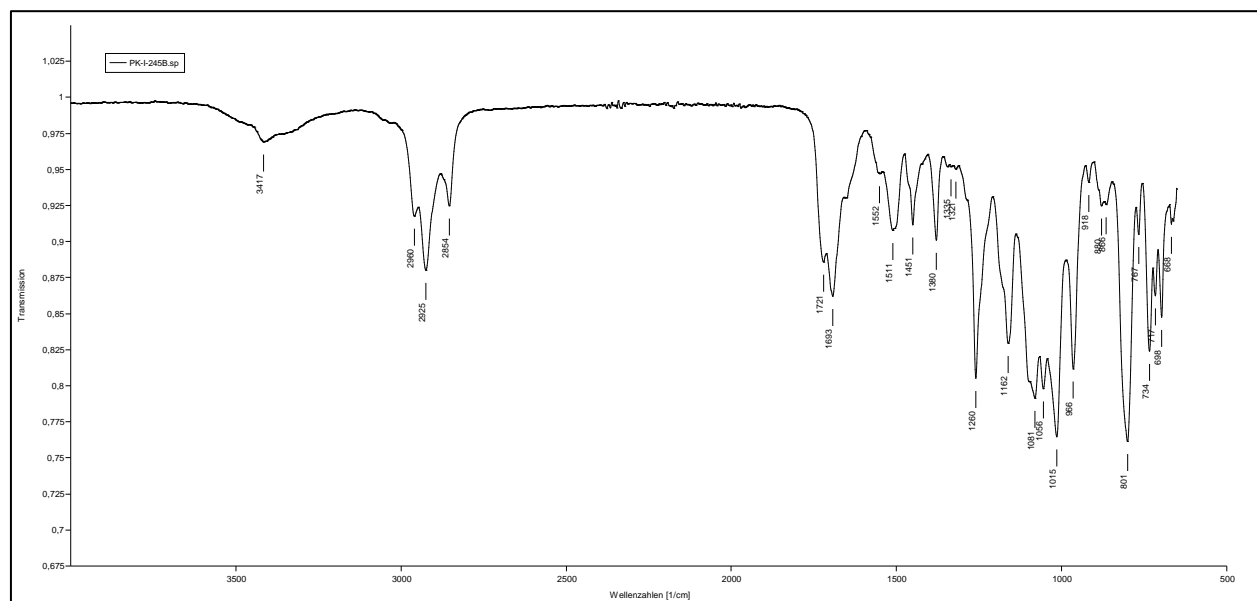

**16-S-Mosher** - (R)-3,3,3-trifluoro-N-((1S,2E,4E,7R,8Z,10E)-1-((2S,4R,5S,6S)-4-hydroxy-5-methyl-6-((E)-prop-1-en-1-yl)tetrahydro-2H-pyran-2-yl)-5,7,9-trimethyl-11-((R)-6-oxo-3,6-dihydro-2H-pyran-2-yl)undeca-2,4,8,10-tetraen-1-yl)-2-methoxy-2-phenylpropanamide

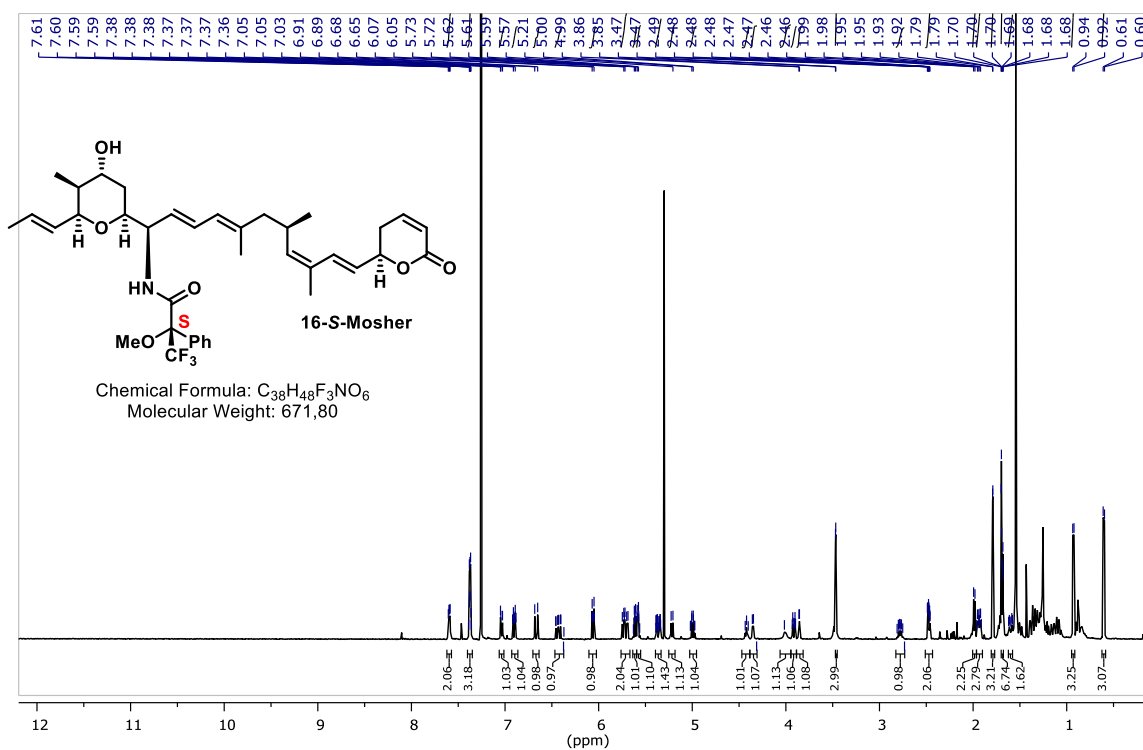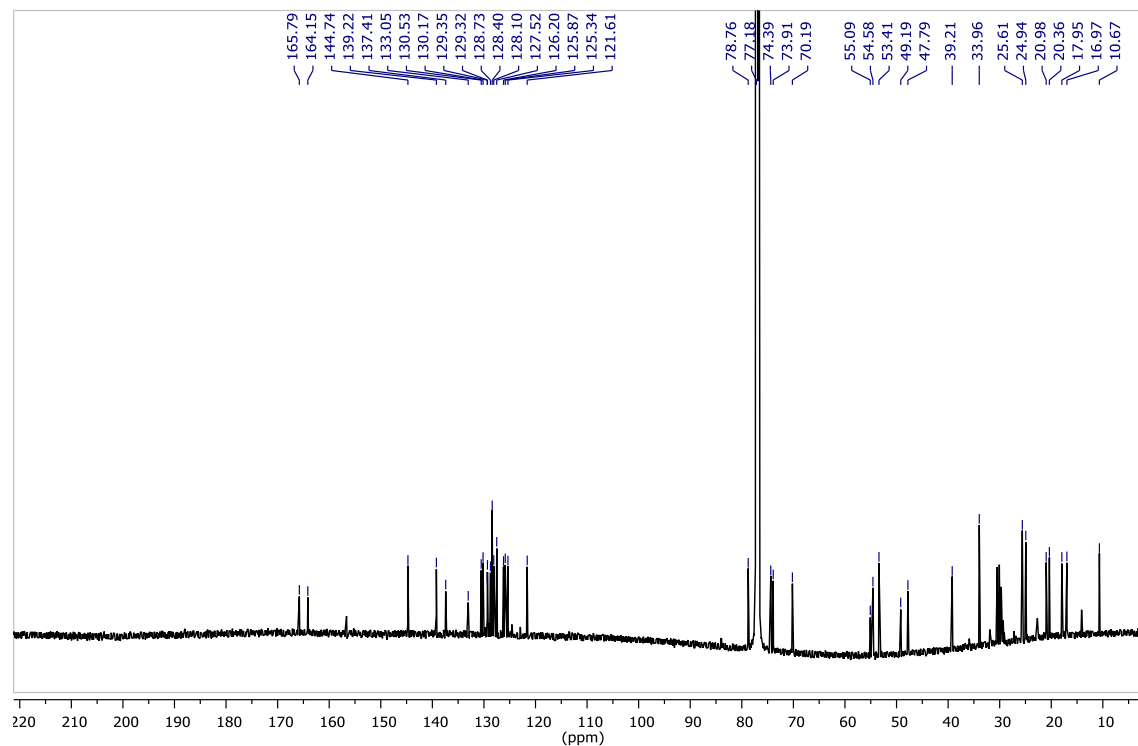

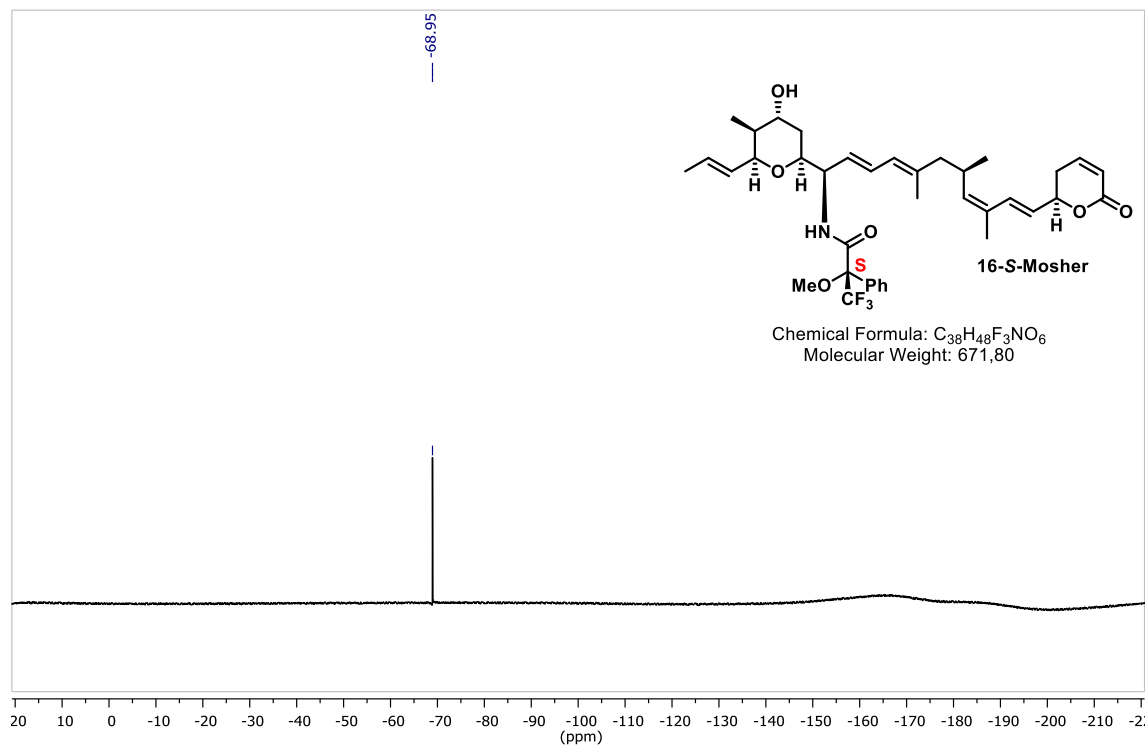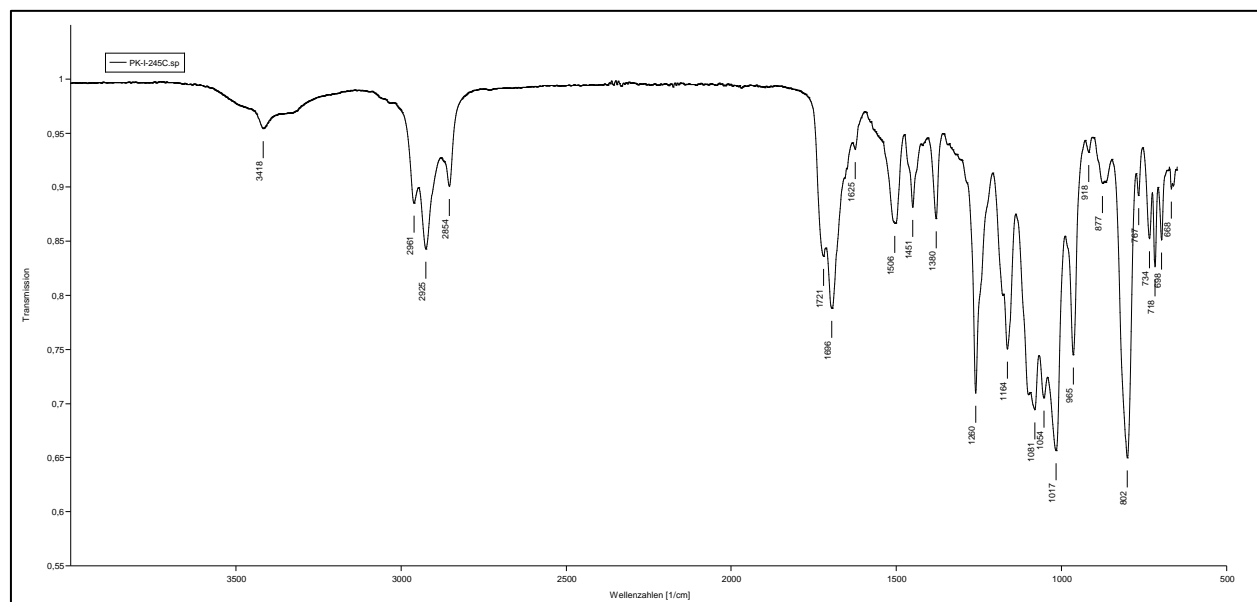

**17-S-Mosher** - (S)-3,3,3-trifluoro-N-((1S,2E,4E,7R,8Z,10E)-1-((2S,4R,5S,6S)-4-hydroxy-5-methyl-6-((E)-prop-1-en-1-yl)tetrahydro-2H-pyran-2-yl)-5,7,9-trimethyl-11-((R)-6-oxo-3,6-dihydro-2H-pyran-2-yl)undeca-2,4,8,10-tetraen-1-yl)-2-methoxy-2-phenylpropanamid

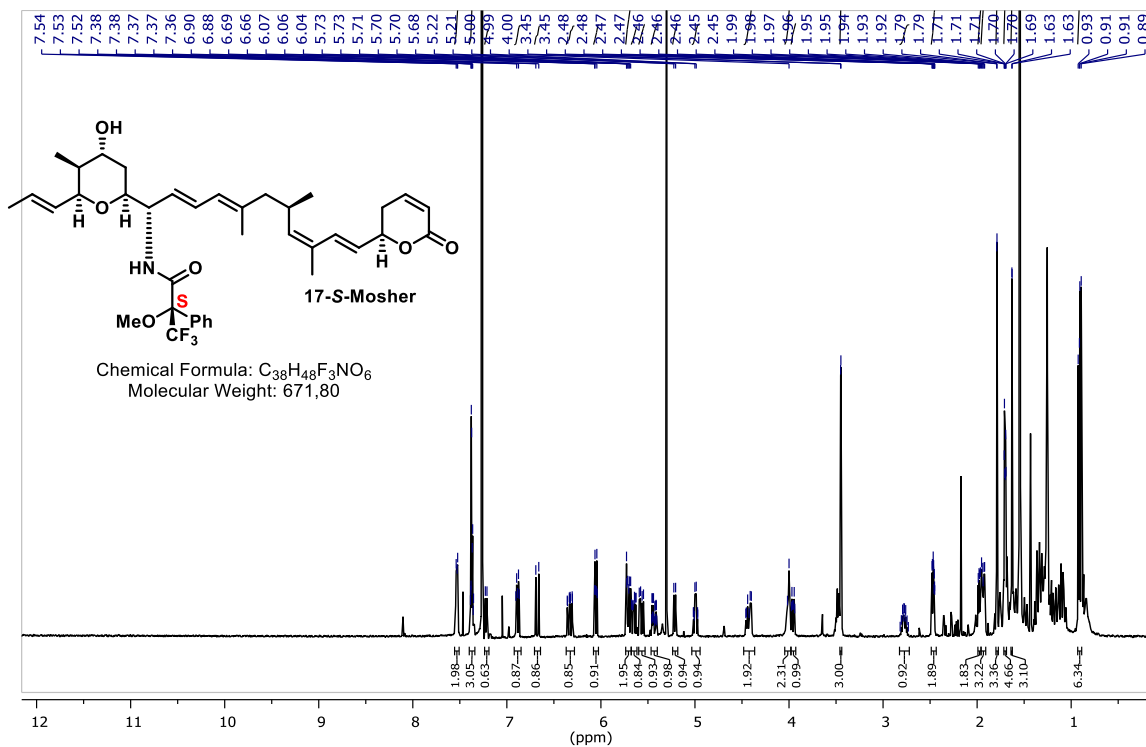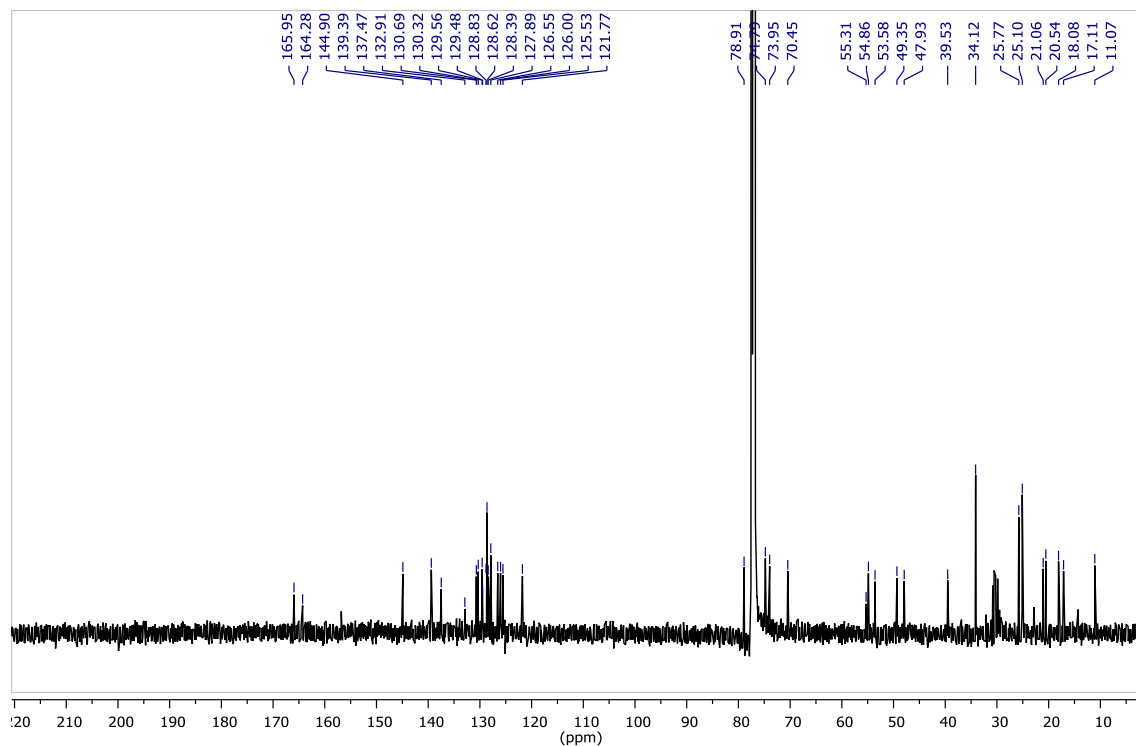

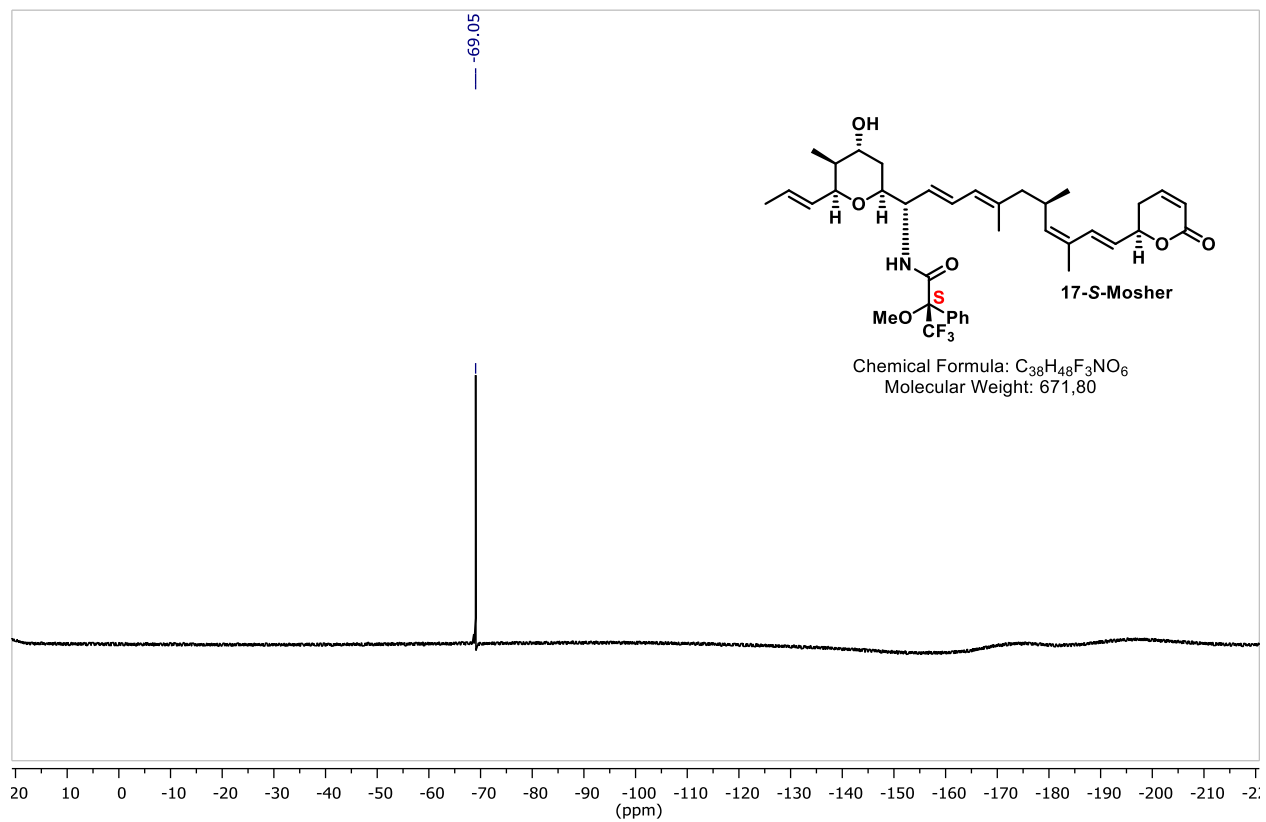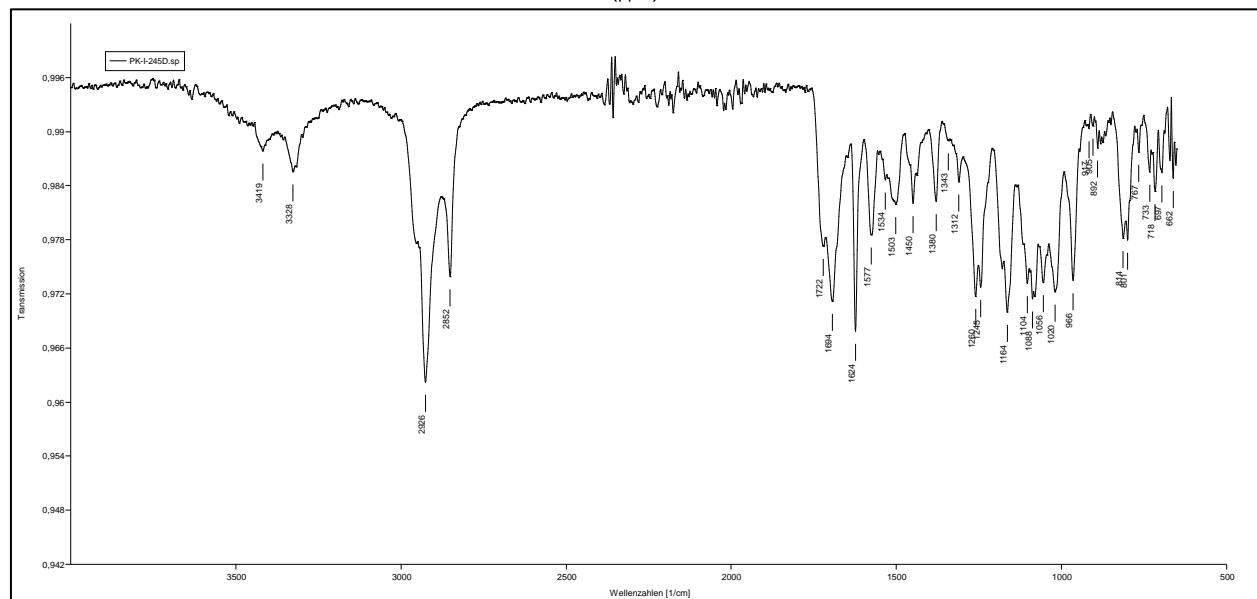



## Pent-4-ynoic acid N-hydroxysuccinimid ester (23)

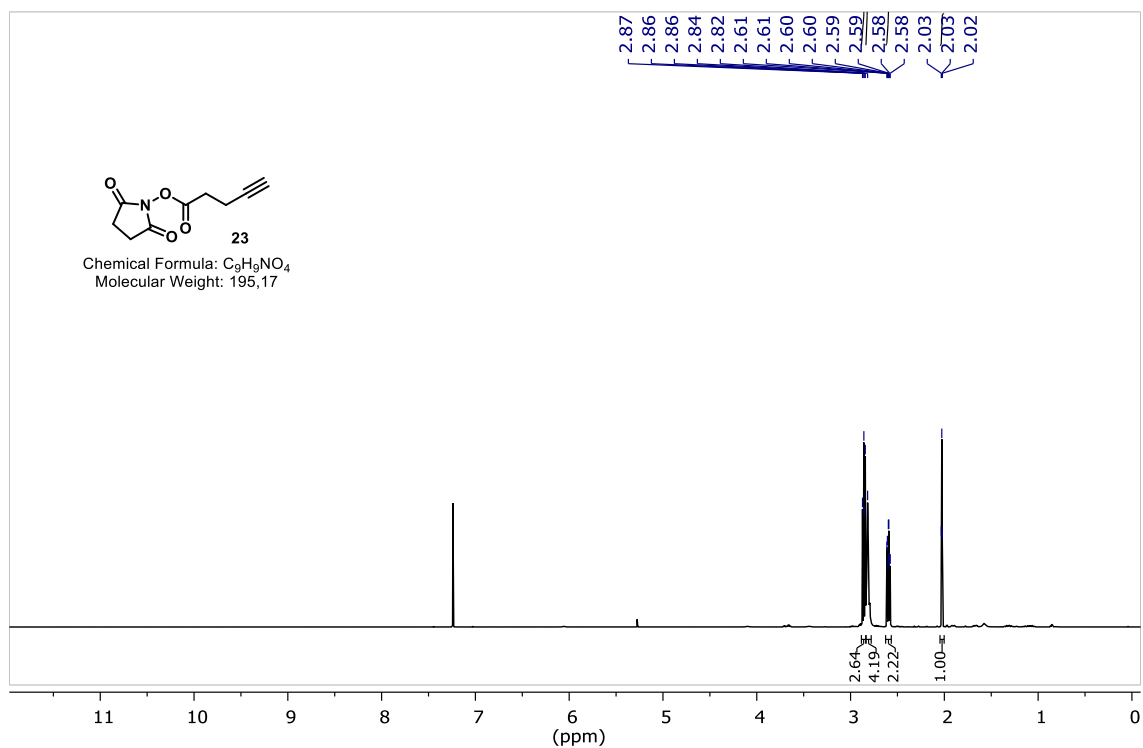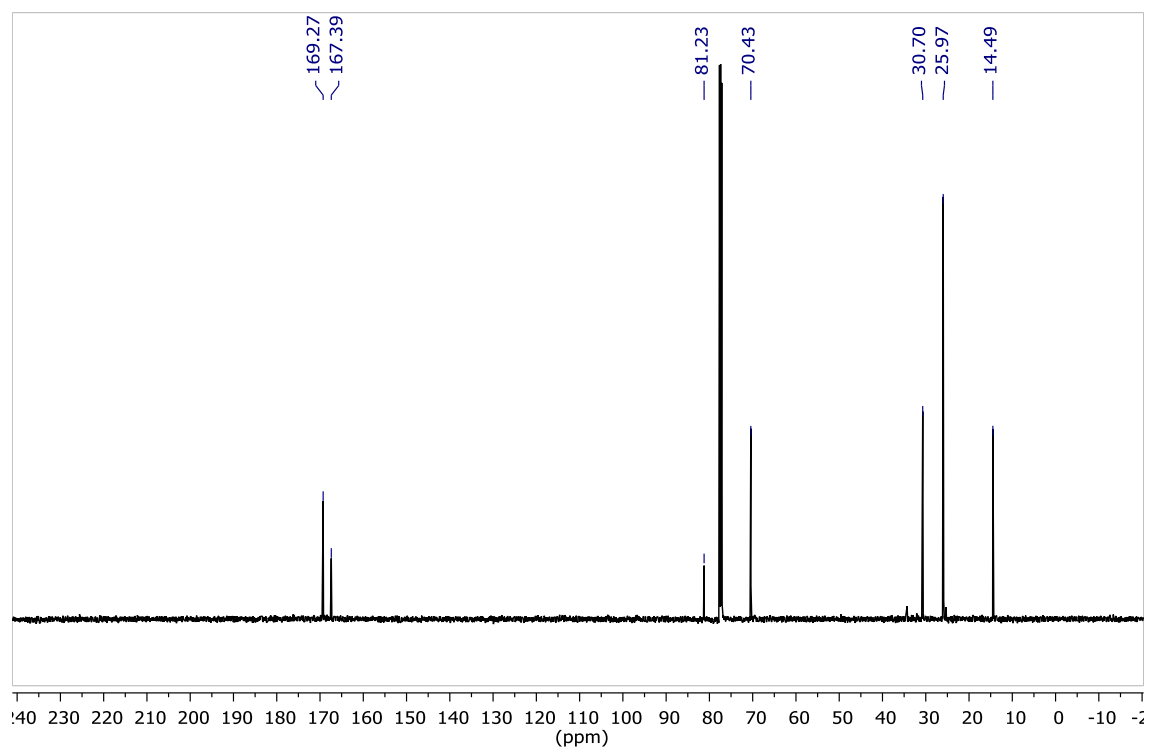

**Compound 20** - N-((1R,2E,4E,7R,8Z,10E)-1-((2S,4R,5S,6S)-4-hydroxy-5-methyl-6-((E)-prop-1-en-1-yl)tetrahydro-2H-pyran-2-yl)-5,7,9-trimethyl-11-((R)-6-oxo-3,6-dihydro-2H-pyran-2-yl)undeca-2,4,8,10-tetraen-1-yl)pent-4-ynamide

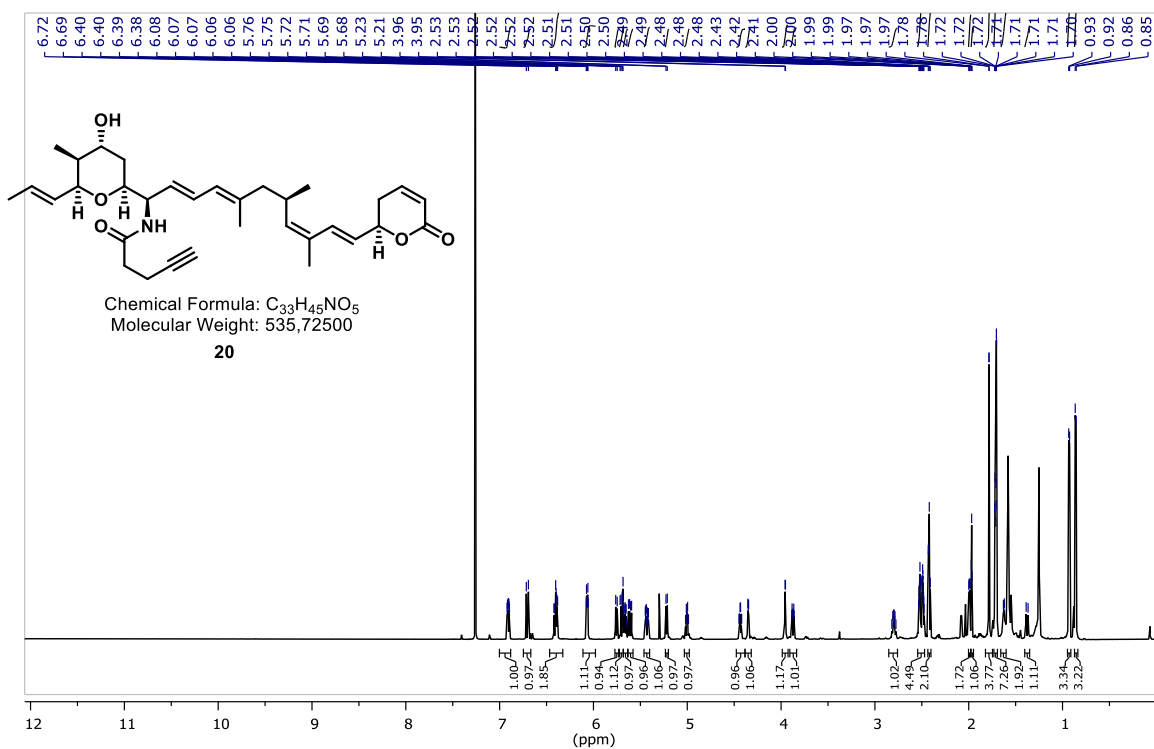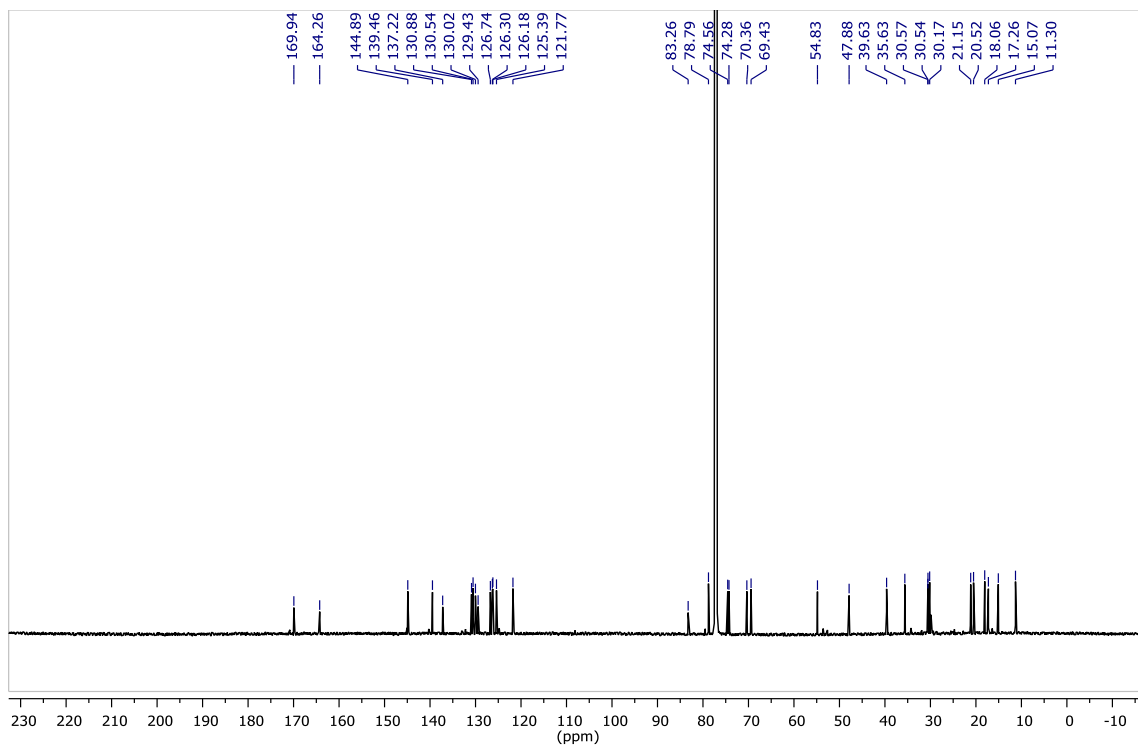

## But-3-yn-1-yl (4-nitrophenyl) carbonate (23)

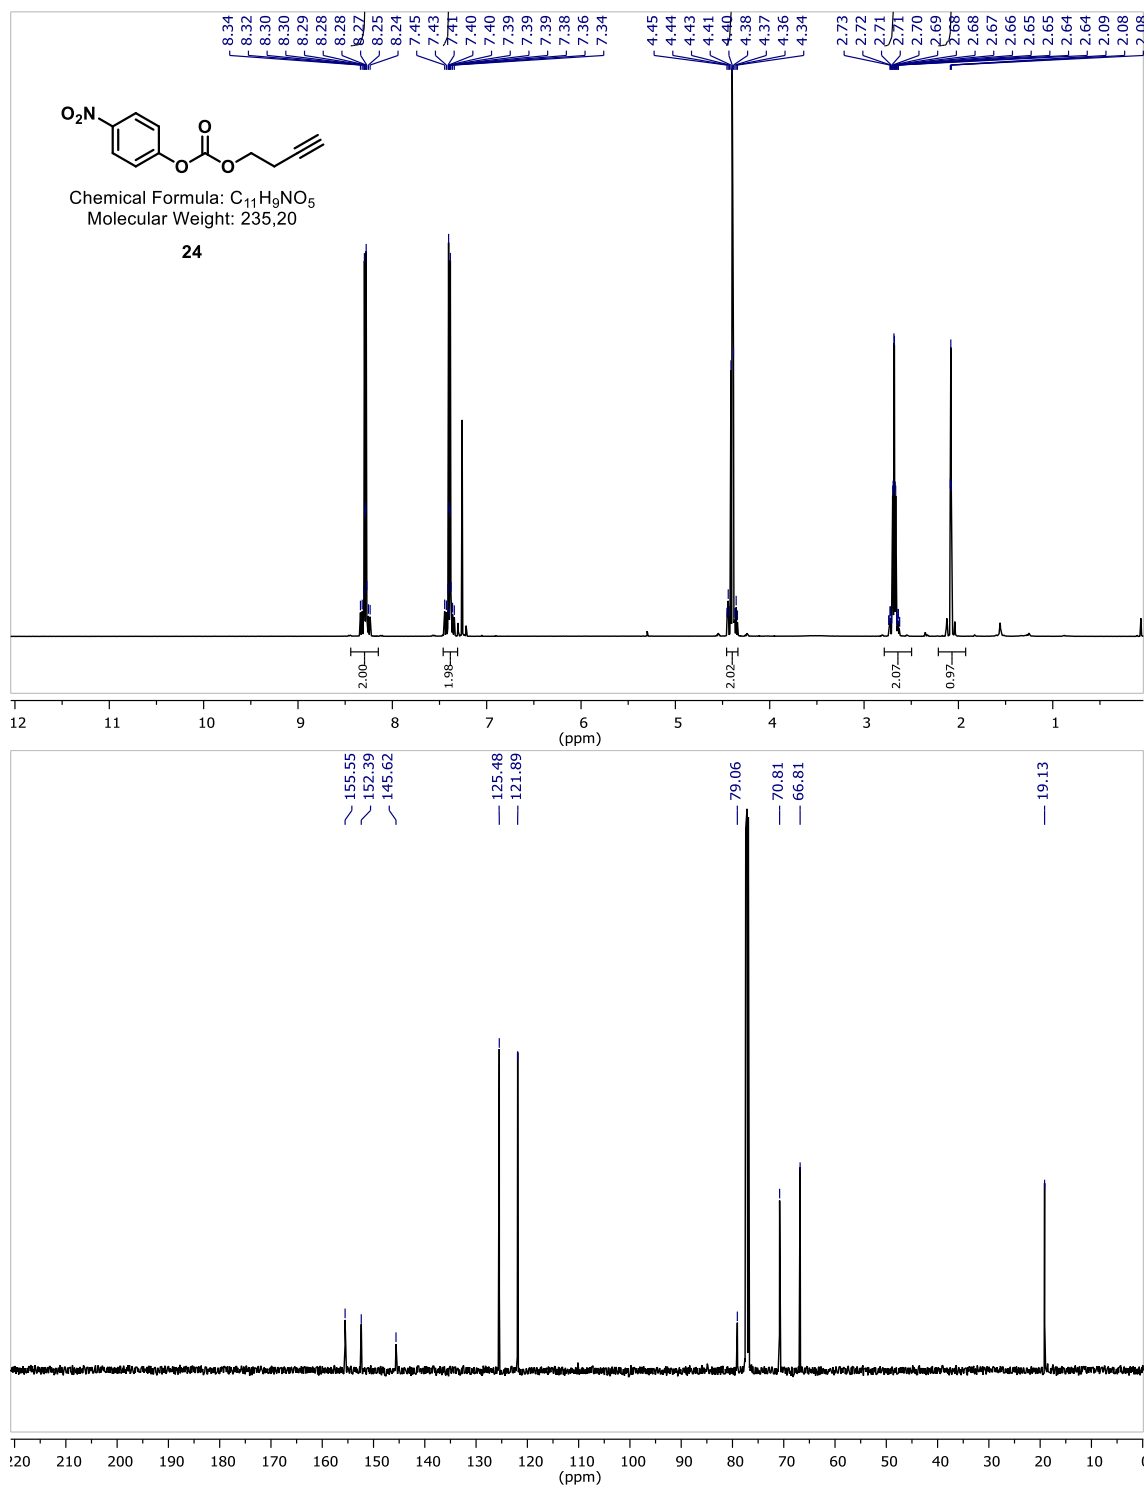

**Compound 21** - But-3-yn-1-yl ((1R,2E,4E,7R,8Z,10E)-1-((2S,4R,5S,6S)-4-hydroxy-5-methyl-6-((E)-prop-1-en-1-yl)tetrahydro-2H-pyran-2-yl)-5,7,9-trimethyl-11-((R)-6-oxo-3,6-dihydro-2H-pyran-2-yl)undeca-2,4,8,10-tetraen-1-yl)carbamate

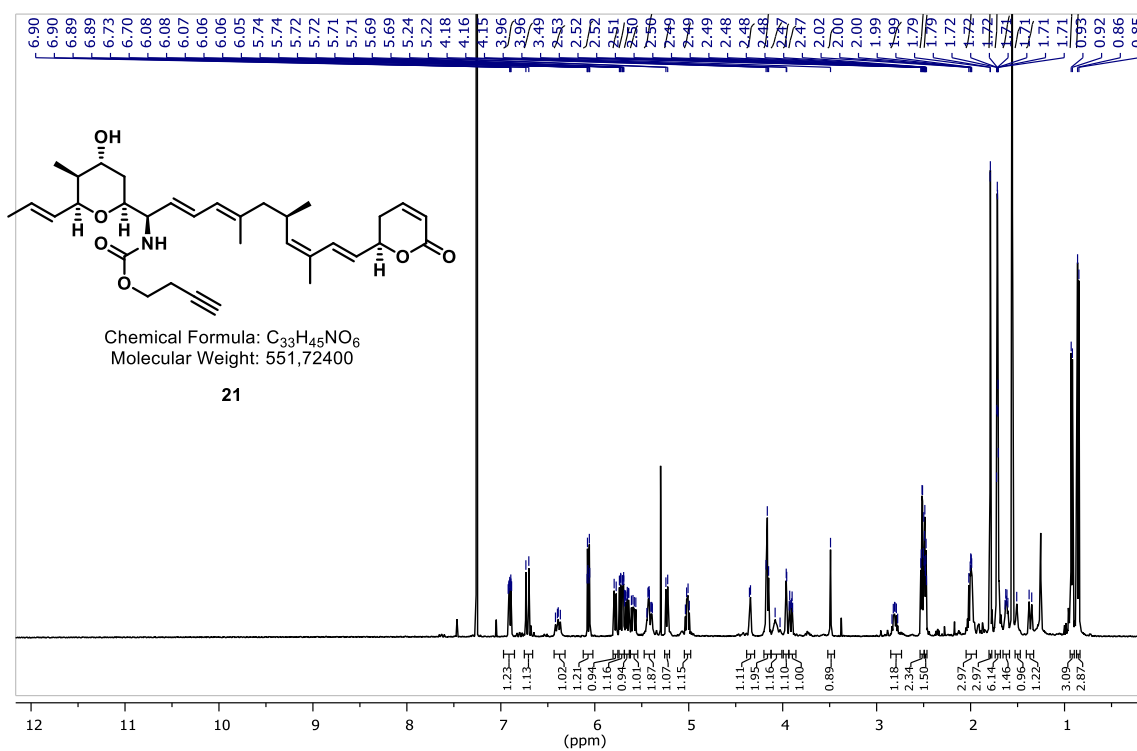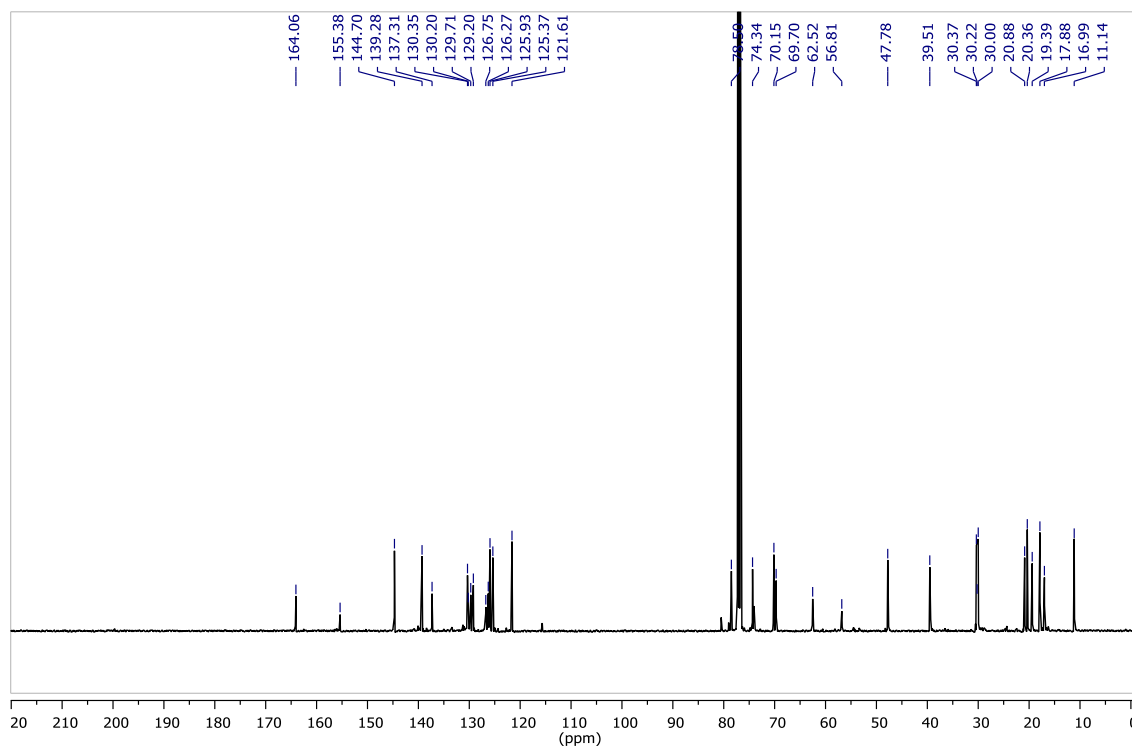

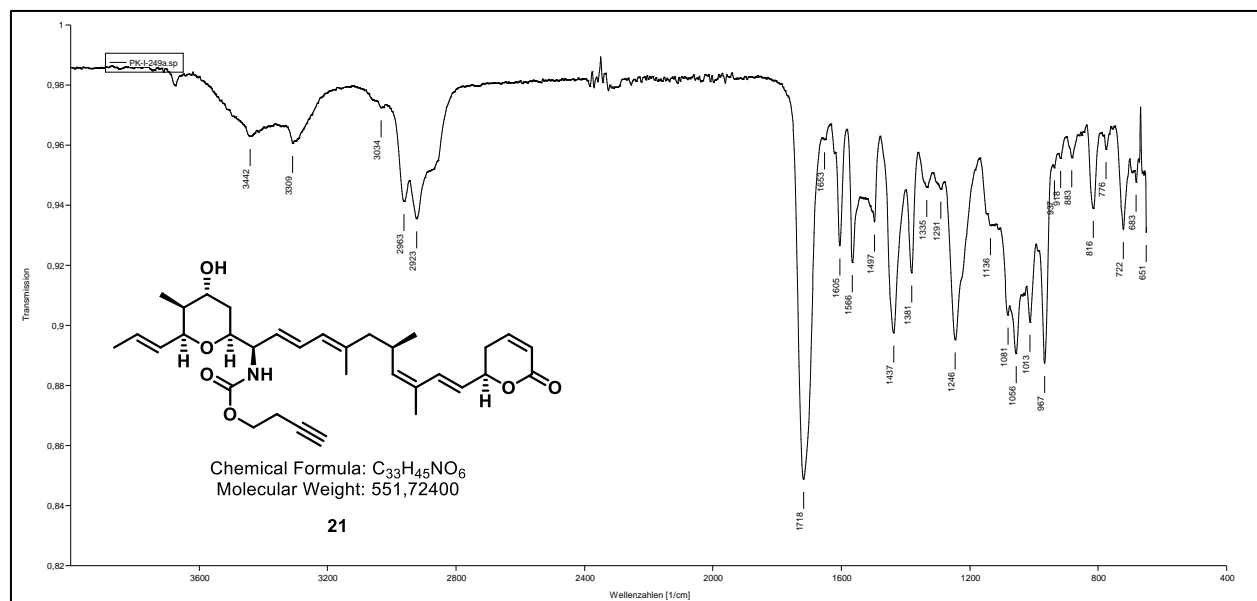

**Compound 22** - But-3-yn-1-yl ((1S,2E,4E,7R,8Z,10E)-1-((2S,4R,5S,6S)-4-hydroxy-5-methyl-6-((E)-prop-1-en-1-yl)tetrahydro-2H-pyran-2-yl)-5,7,9-trimethyl-11-((R)-6-oxo-3,6-dihydro-2H-pyran-2-yl)undeca-2,4,8,10-tetraen-1-yl)carbamate

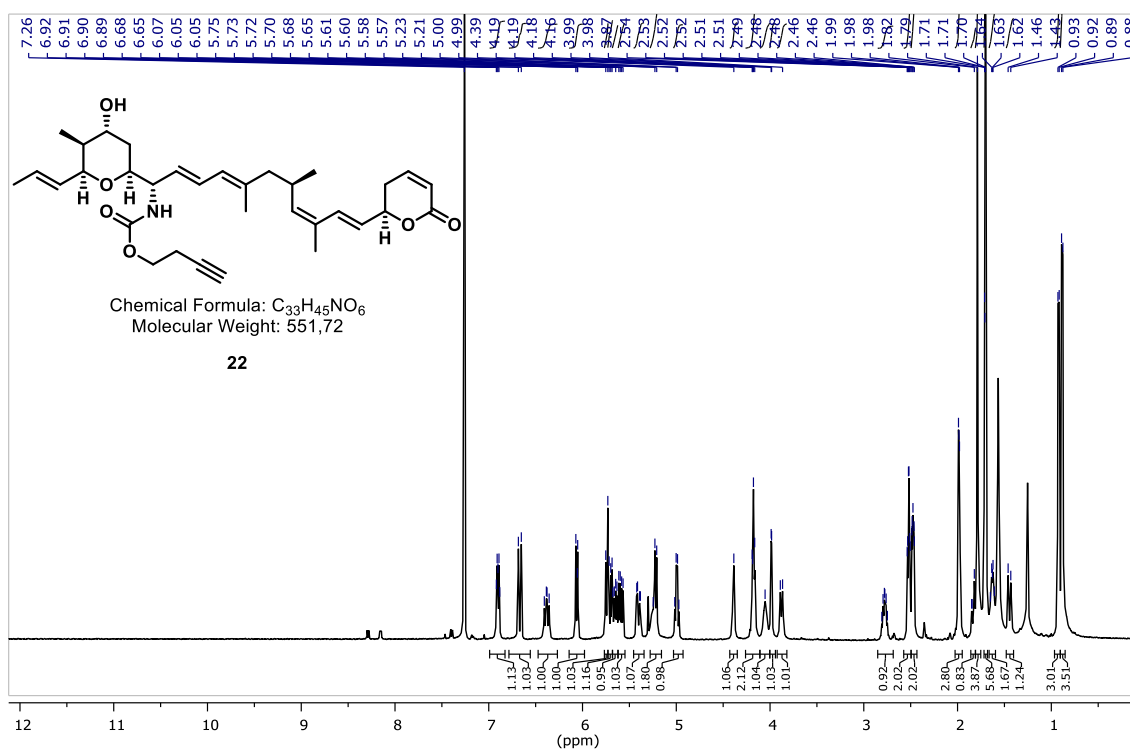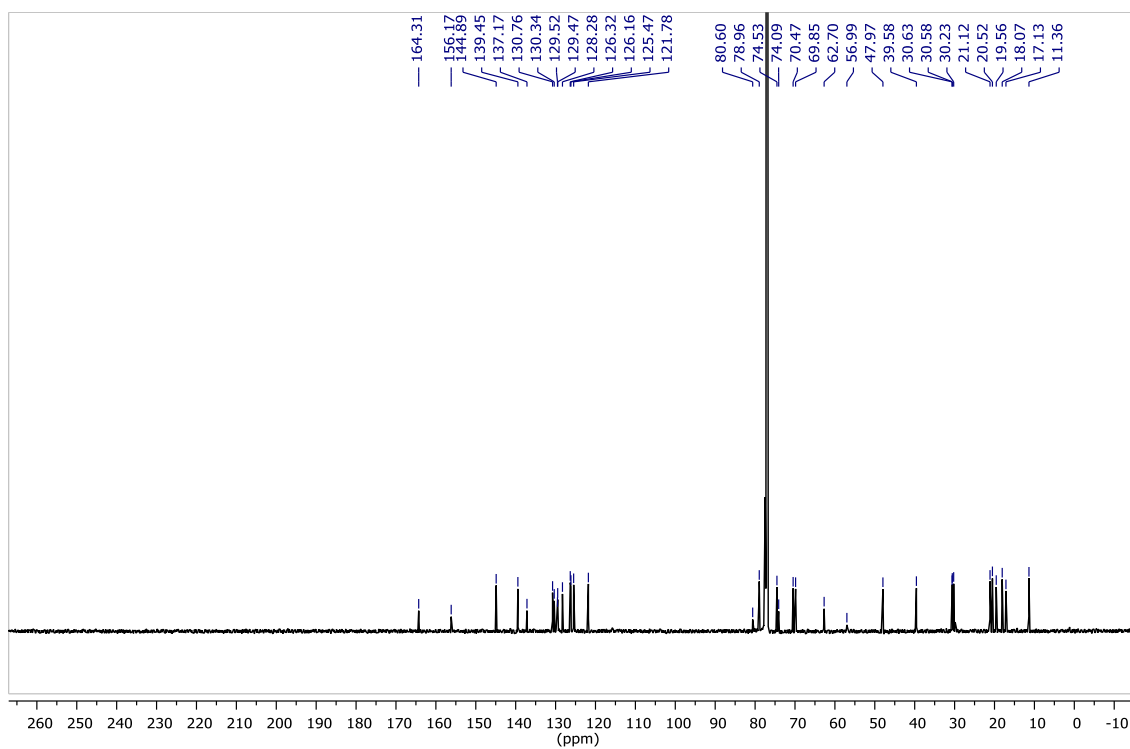

**Fmoc-Cit-pABA** – (9H-fluoren-9-yl)methyl (S)-1-((4-(hydroxymethyl)phenyl)amino)-1-oxo-5-ureidopentan-2-yl)carbamate

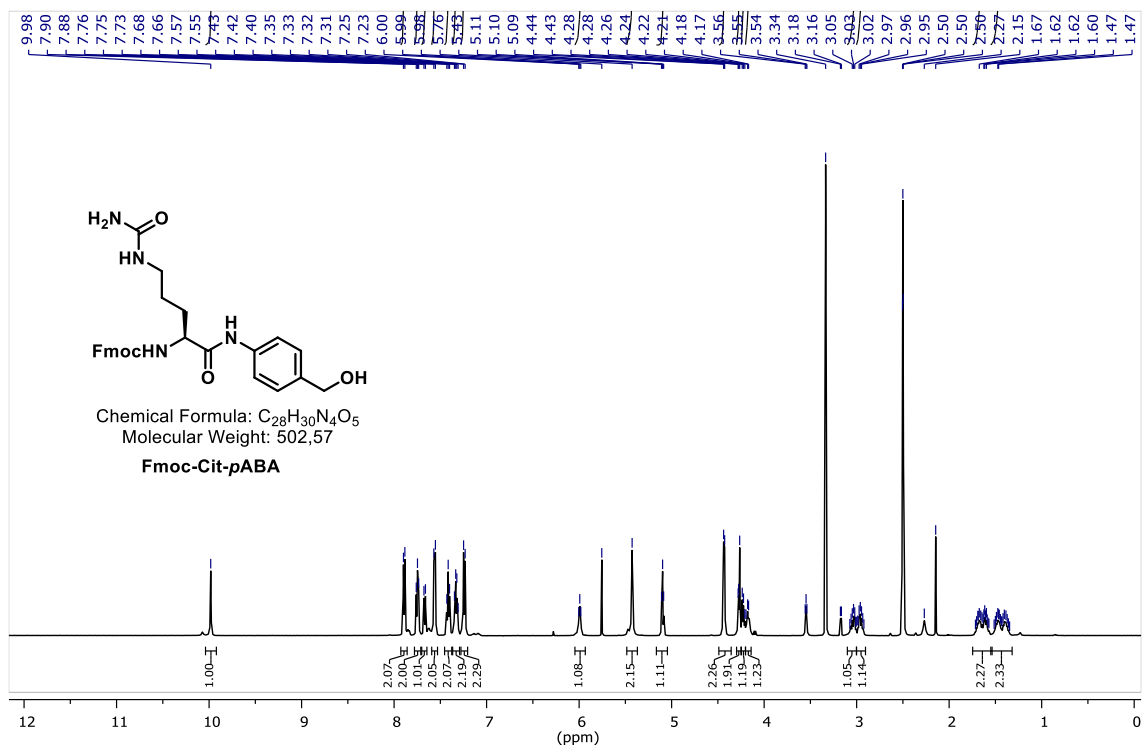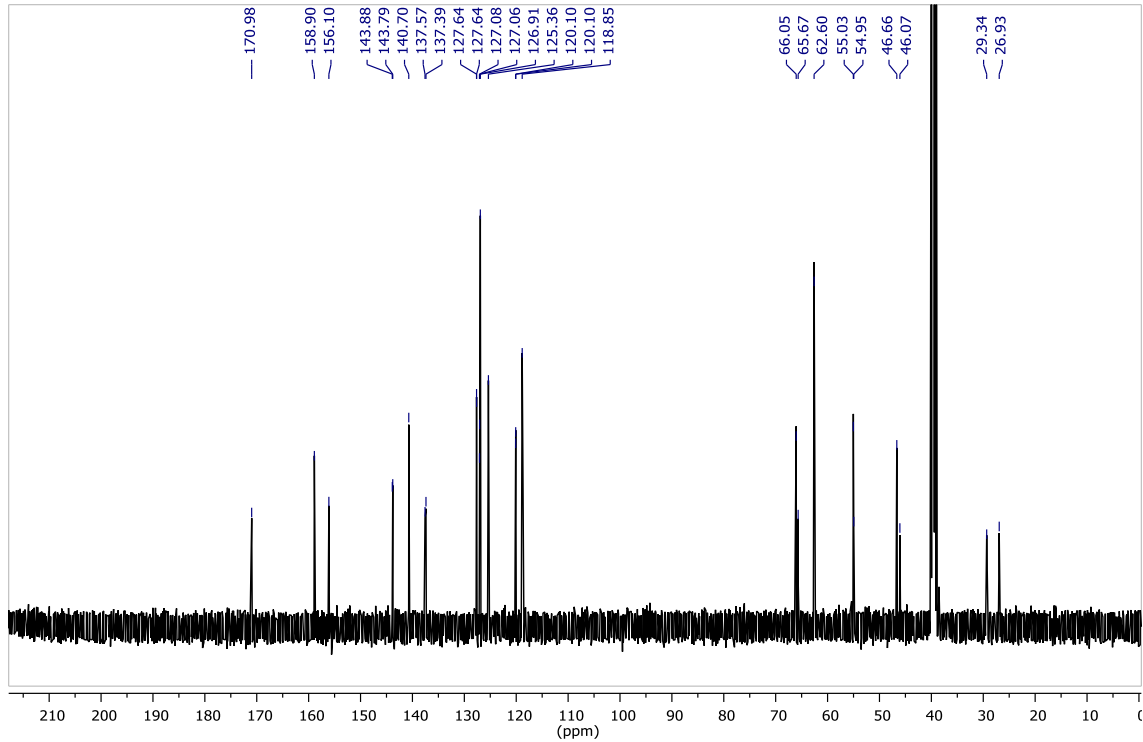

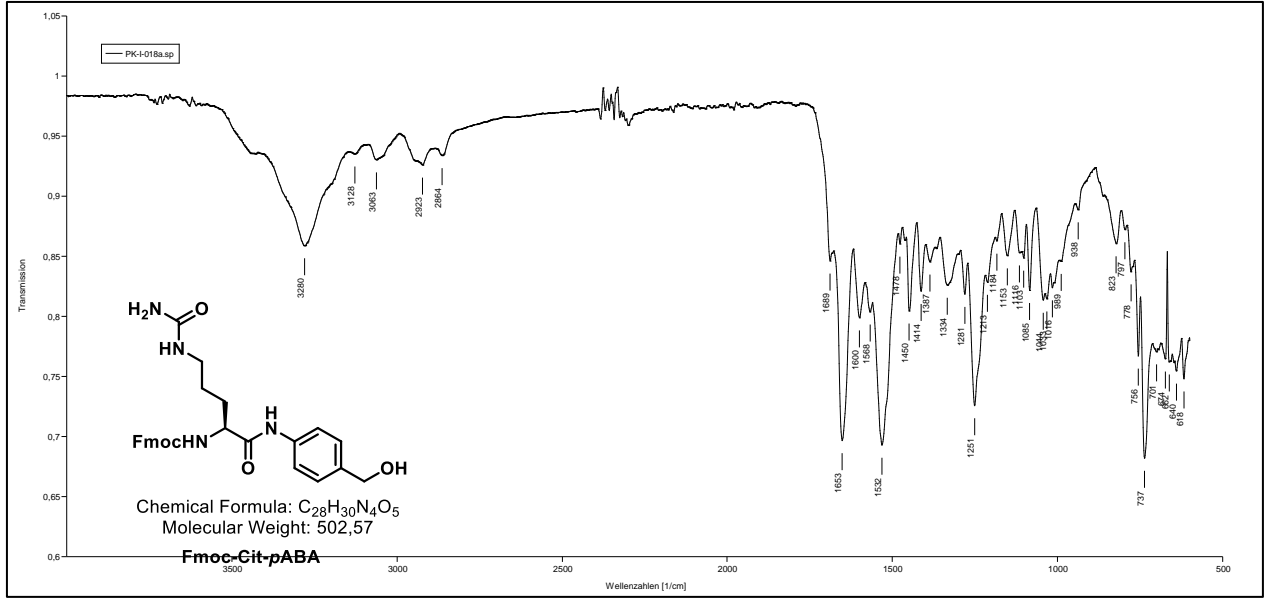



**H<sub>2</sub>N-Val-Cit-pABA**  
ureidopentanamide

**S)-2-((S)-2-amino-3-methylbutanamido)-N-(4-(hydroxymethyl)phenyl)-5-**

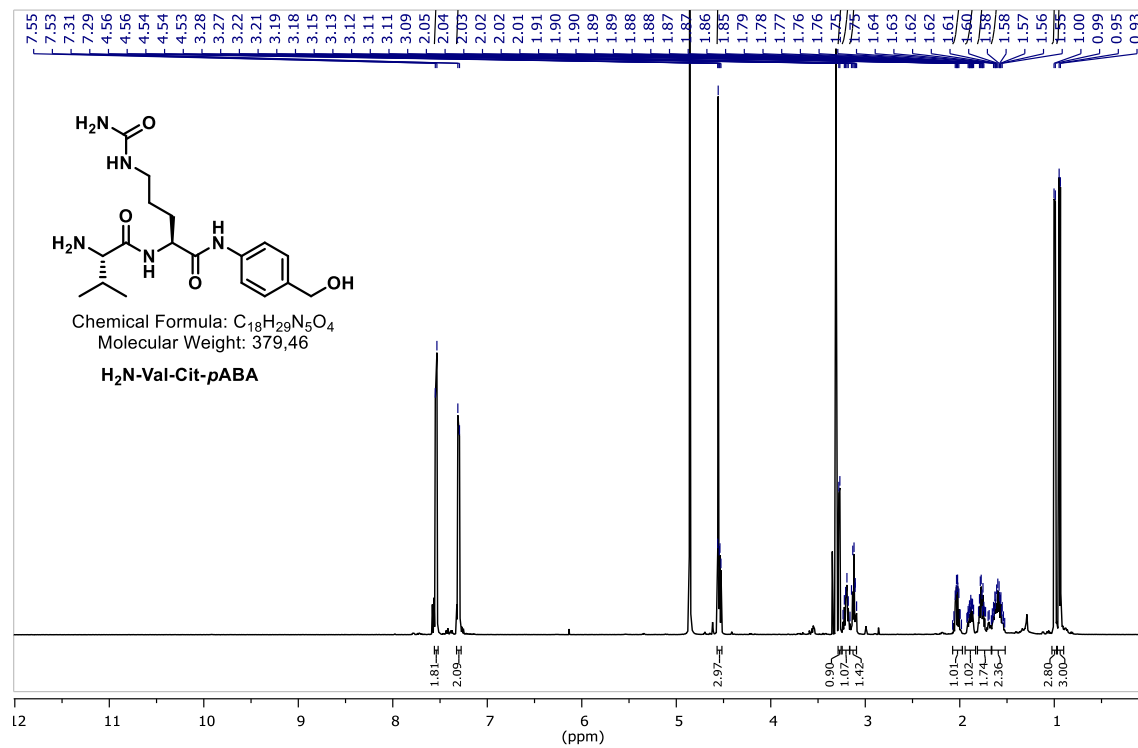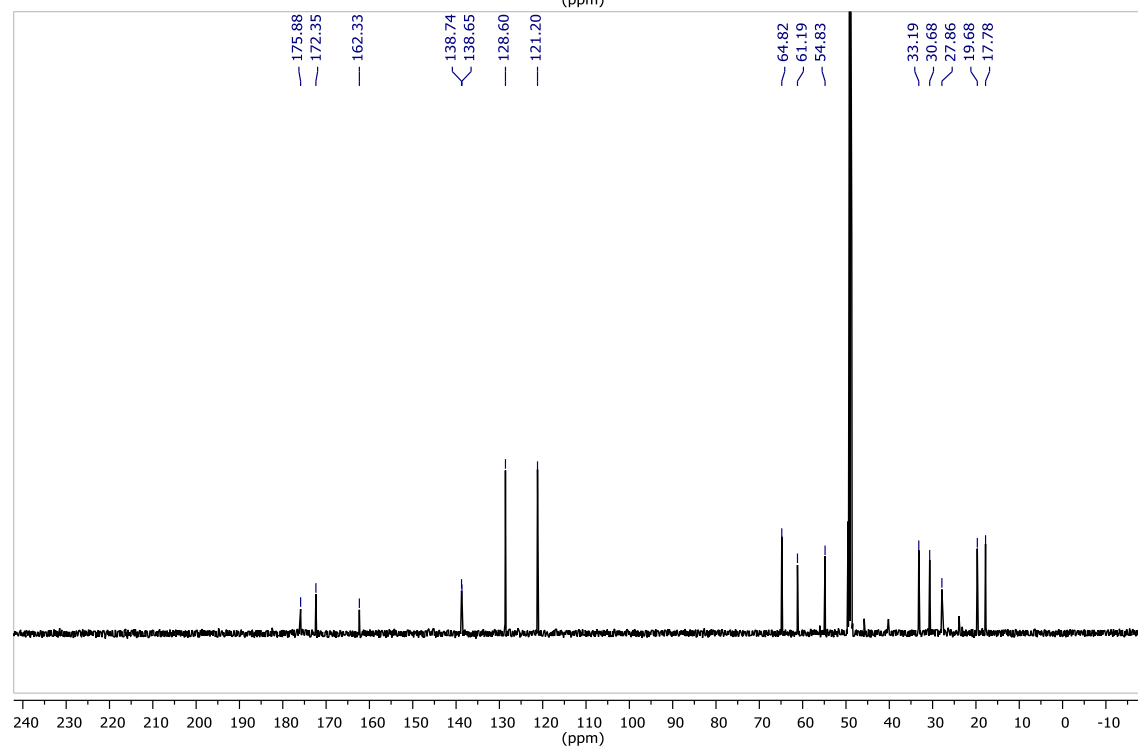

**BCN-pNPC** – ((1R,8S,9s)-bicyclo[6.1.0]non-4-yn-9-yl)methyl (4-nitrophenyl) carbonate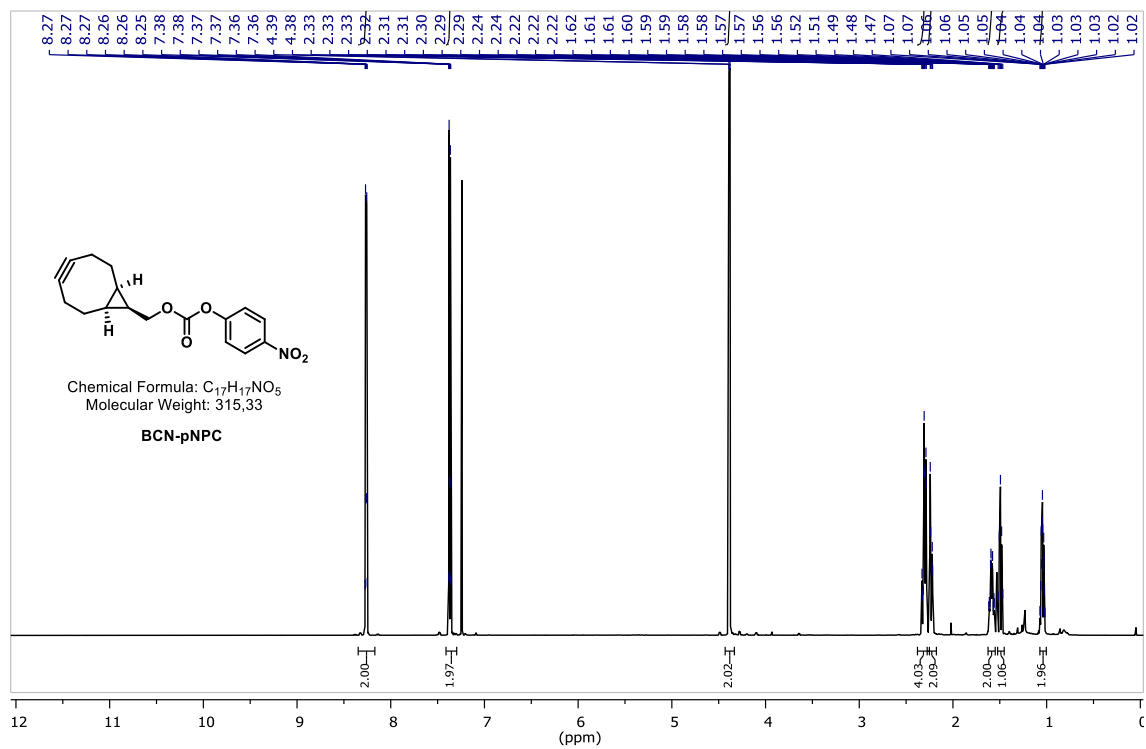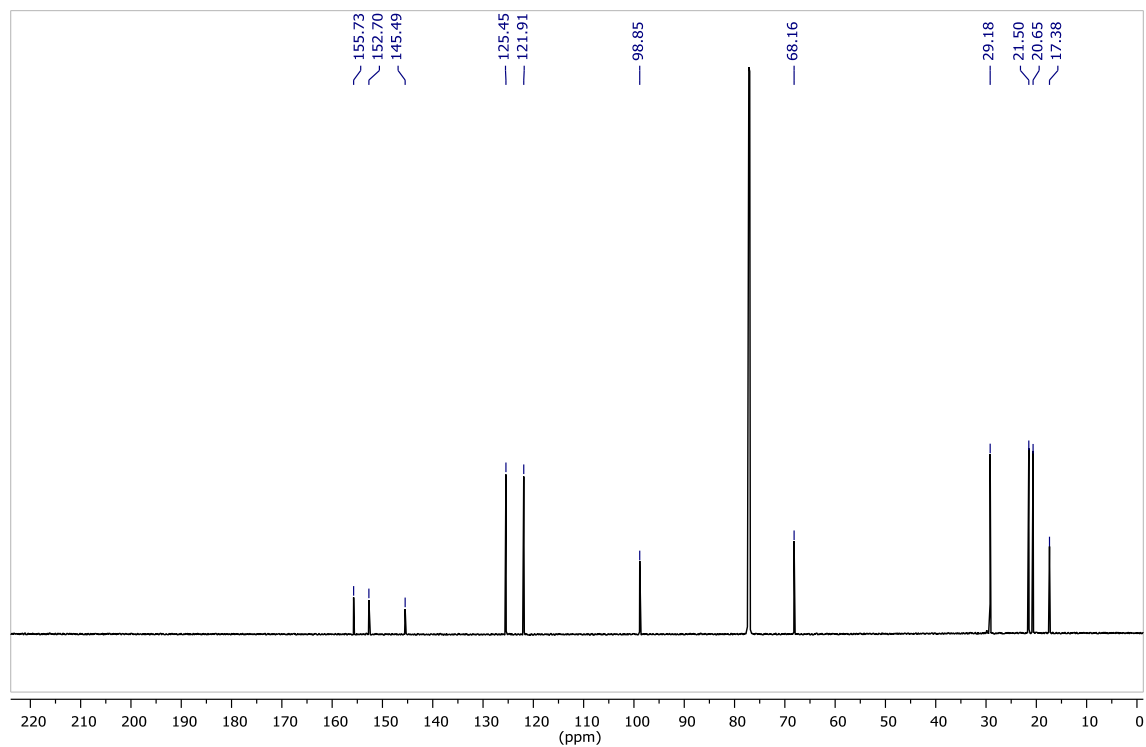

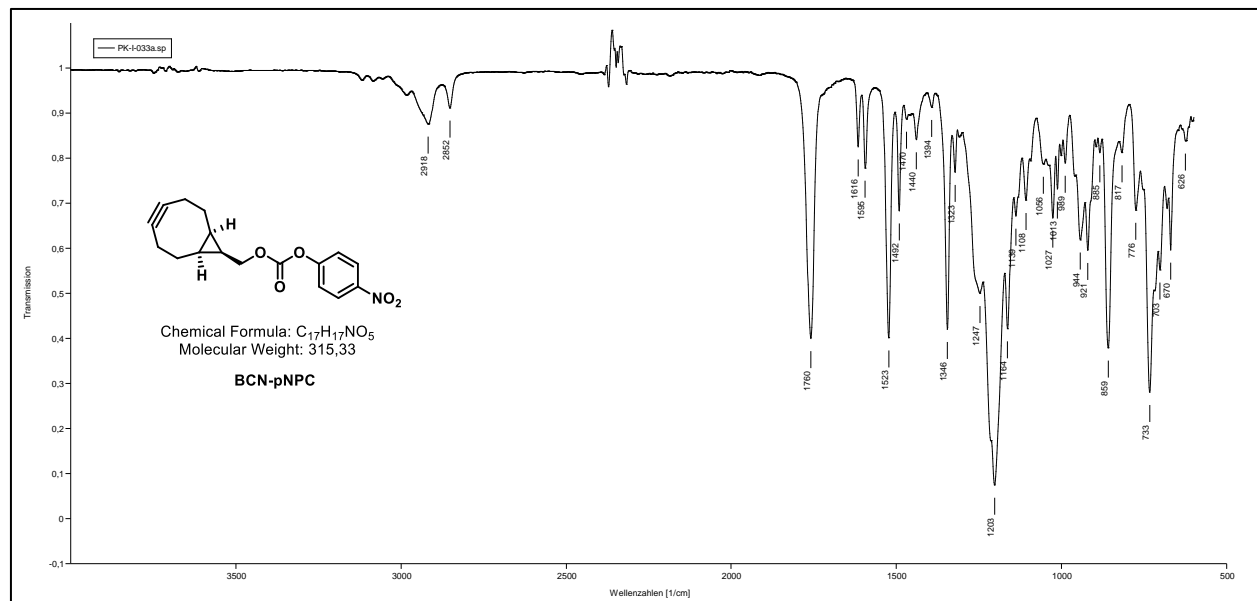

**BCN-O(CO)HN-Val-Cit-pABA** – (S)-2-((S)-2-amino-3-methylbutanamido)-N-(4-(hydroxymethyl)-phenyl)-5-ureidopentanamide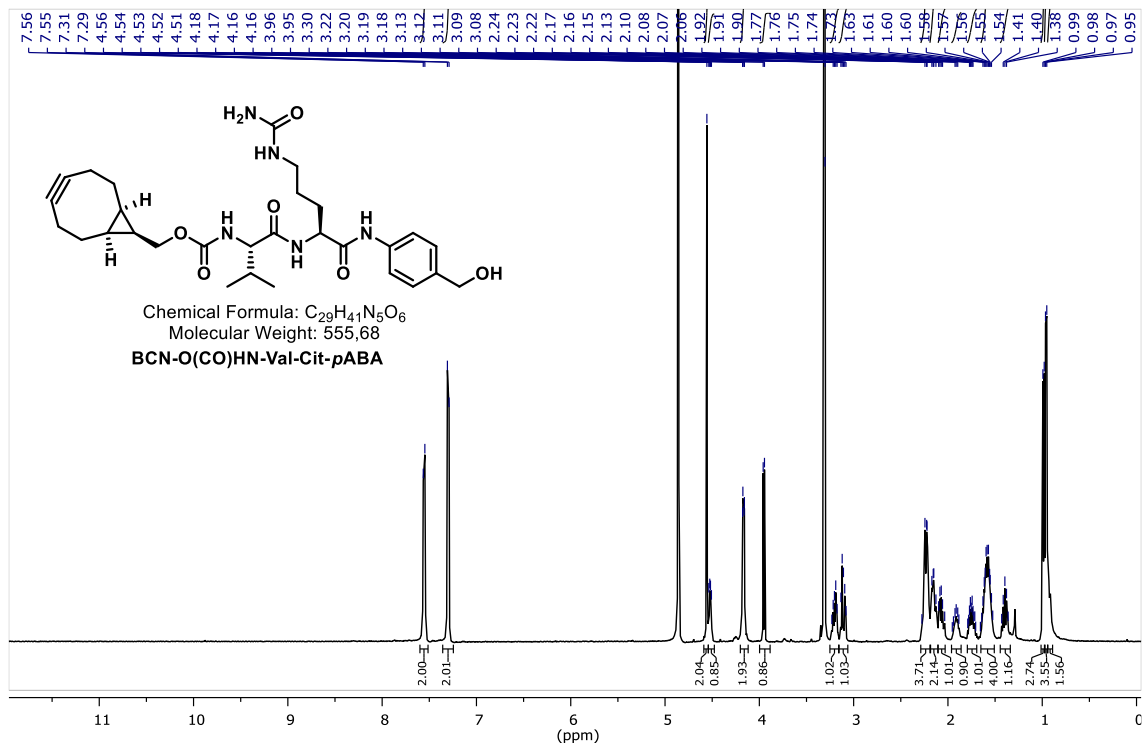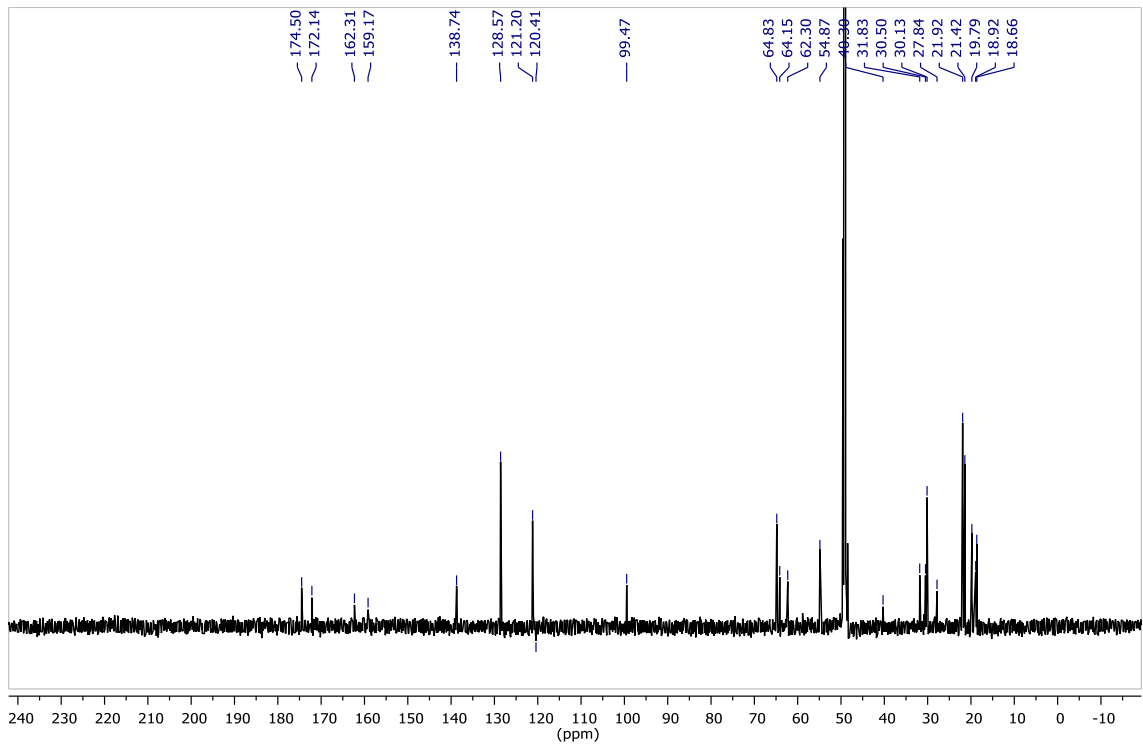

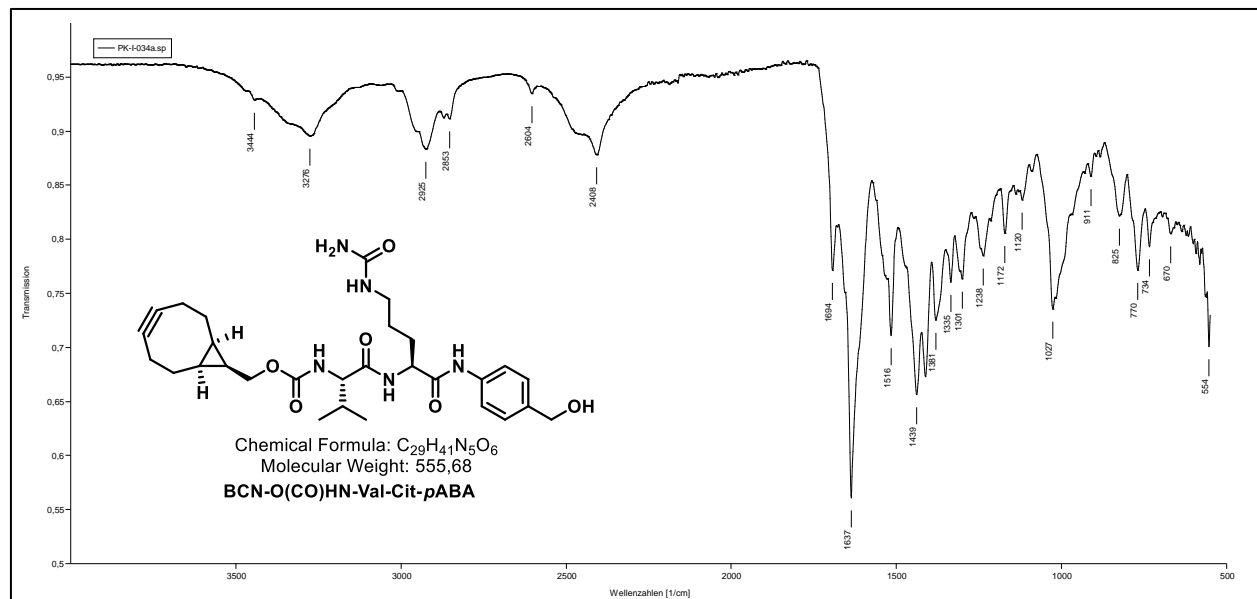

**BCN-O(CO)HN-Val-Cit-pABO(CO)O(4-NO<sub>2</sub>-Ph)** – ((1R,8S,9s)-bicyclo[6.1.0]non-4-yn-9-yl)methyl ((S)-3-methyl-1-(((S)-1-((4-(((4-nitrophenoxy)carbonyl)oxy)methyl)phenyl)amino)-1-oxo-5-ureidopentan-2-yl)amino)-1-oxobutan-2-yl)carbamate

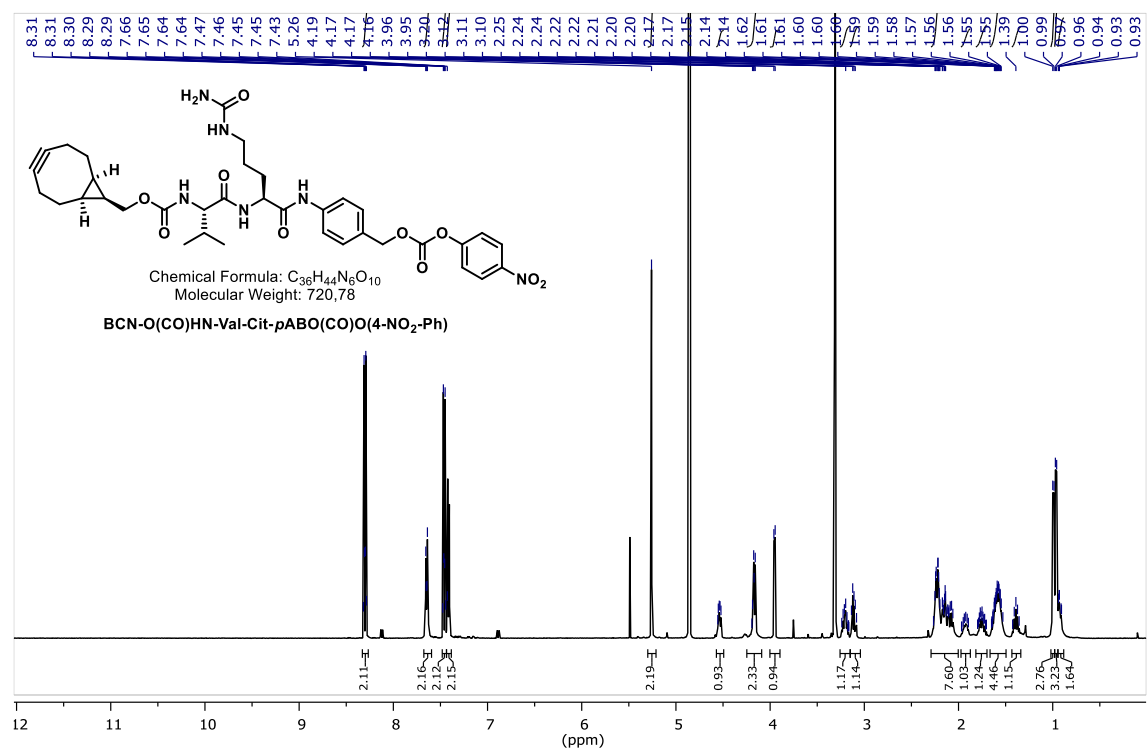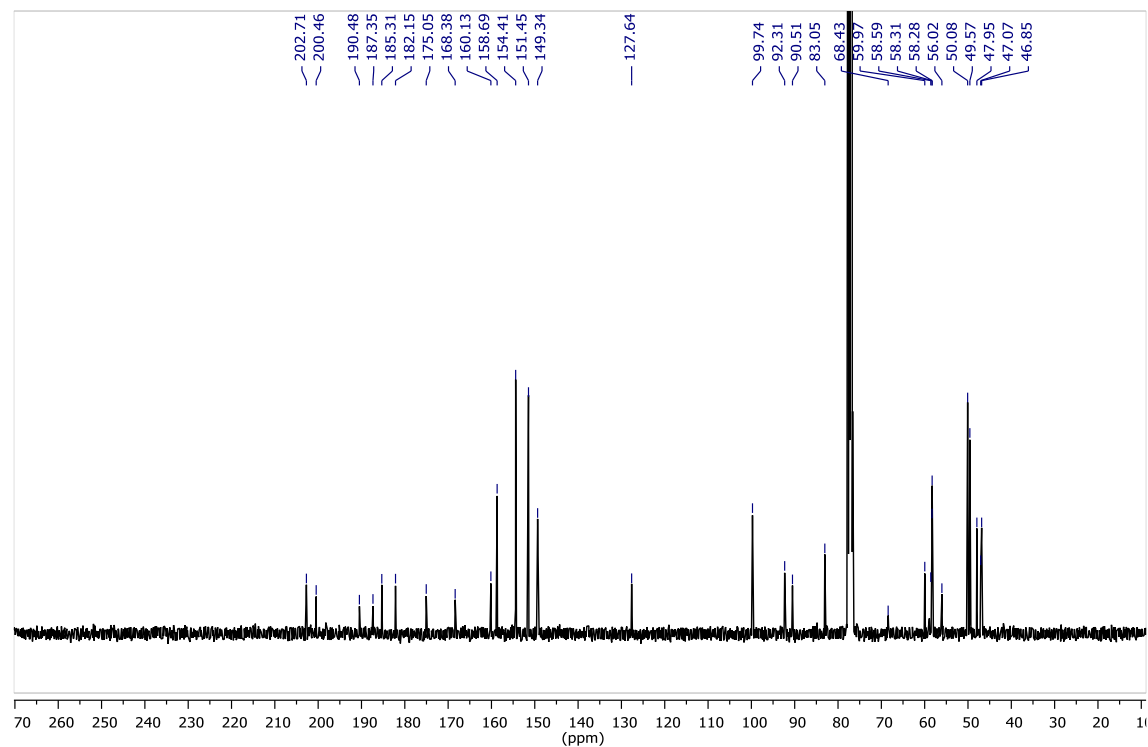

**BCN-O(CO)HN-Val-Cit-pABO(CO)-16R-Aminoratjadone (25)** – ((1R,8S,9s)-bicyclo[6.1.0]non-4-yn-9-yl)methyl ((S)-1-(((S)-1-((4-((((1R,2E,4E,7R,8Z,10E)-1-((2S,4R,5S,6S)-4-hydroxy-5-methyl-6-((E)-prop-1-en-1-yl)tetrahydro-2H-pyran-2-yl)-5,7,9-trimethyl-11-((R)-6-oxo-3,6-dihydro-2H-pyran-2-yl)undeca-2,4,8,10-tetraen-1-yl)carbamoyl)oxy)methyl)phenyl)amino)-1-oxo-5-ureidopentan-2-yl)amino)-3-methyl-1-oxobutan-2-yl)carbamate

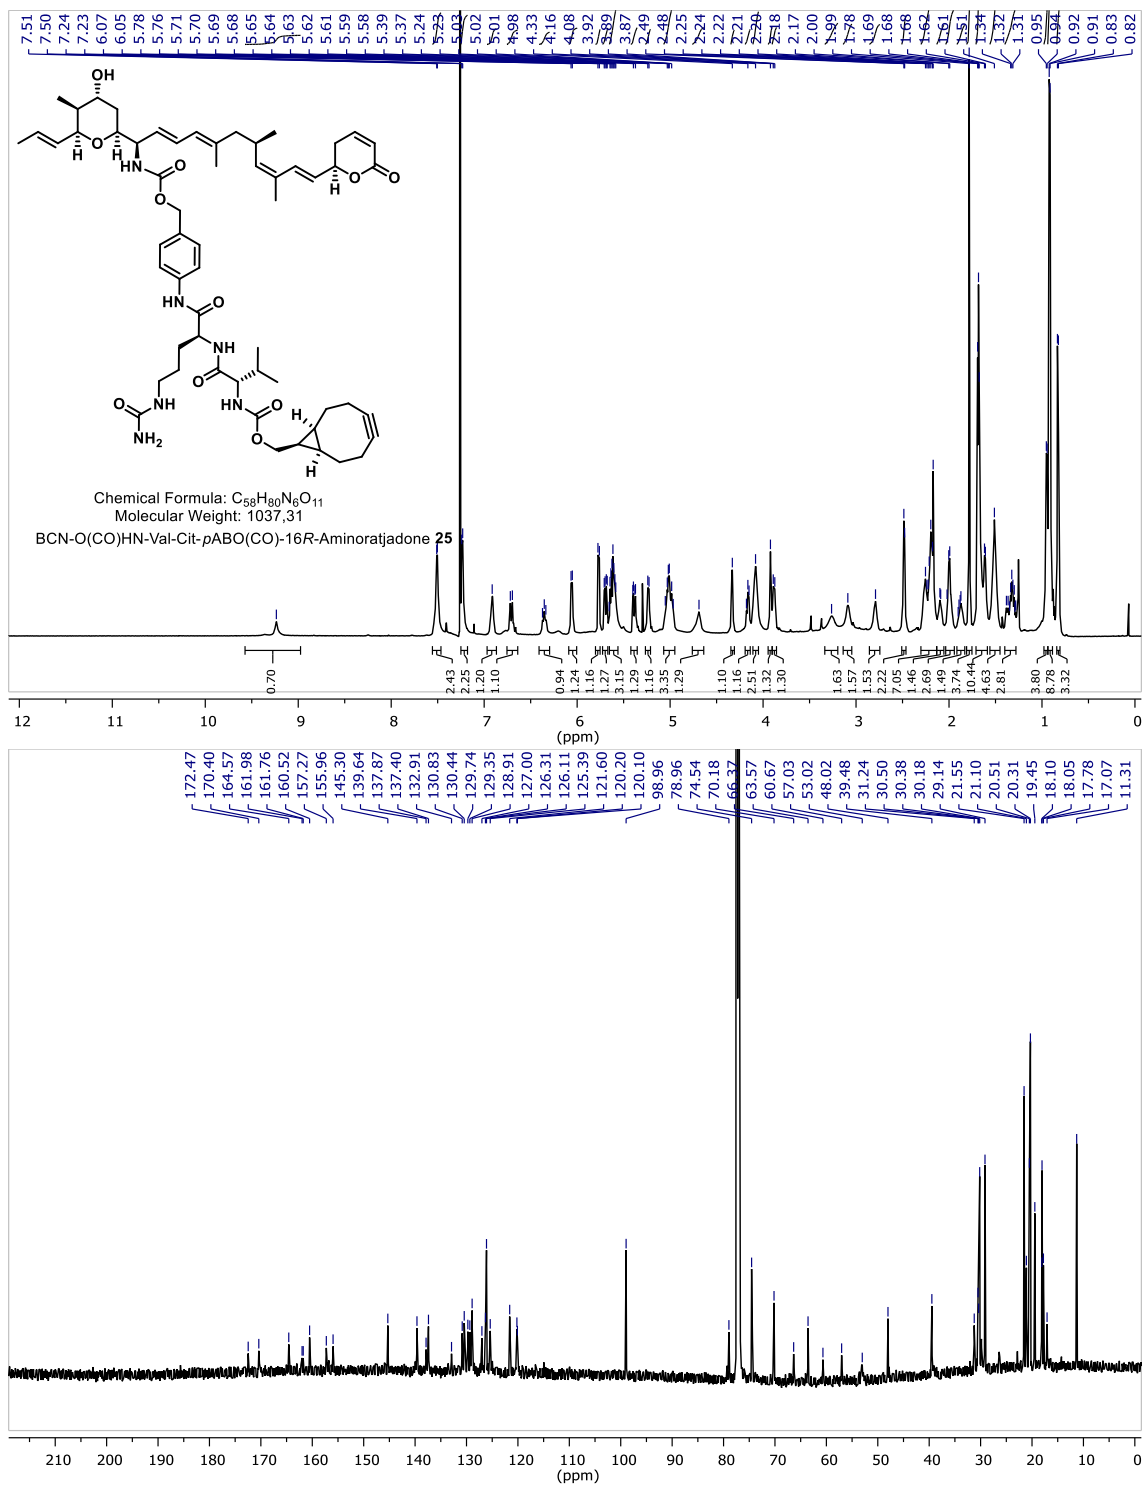

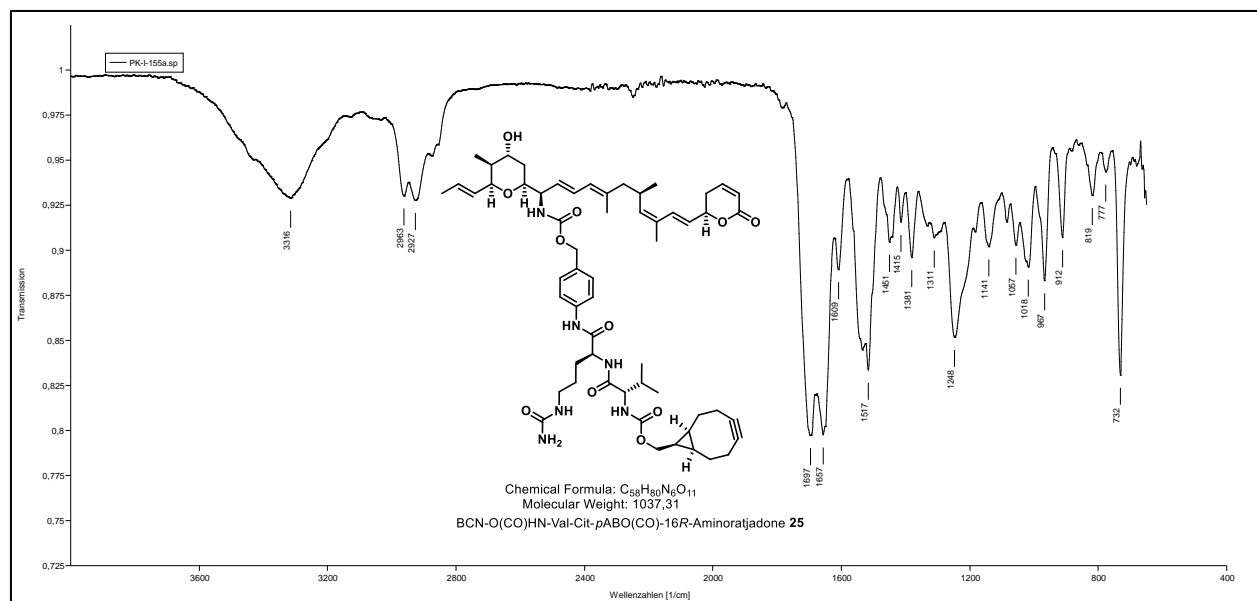



**Homopropargyl-O(CO)HN-Val-Cit-pABA – But-3-yn-1-yl ((S)-1-(((S)-1-(4-(hydroxymethyl)phenyl)-amino)-1-oxo-5-ureidopentan-2-yl)amino)-3-methyl-1-oxobutan-2-yl)carbamate**

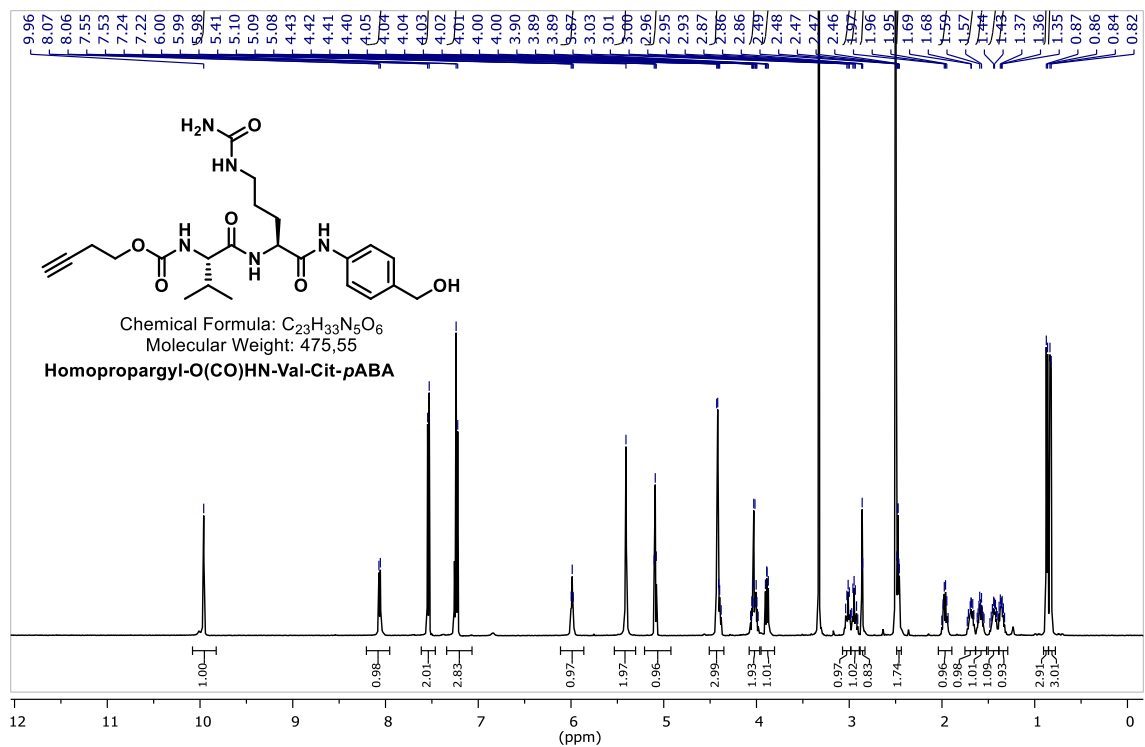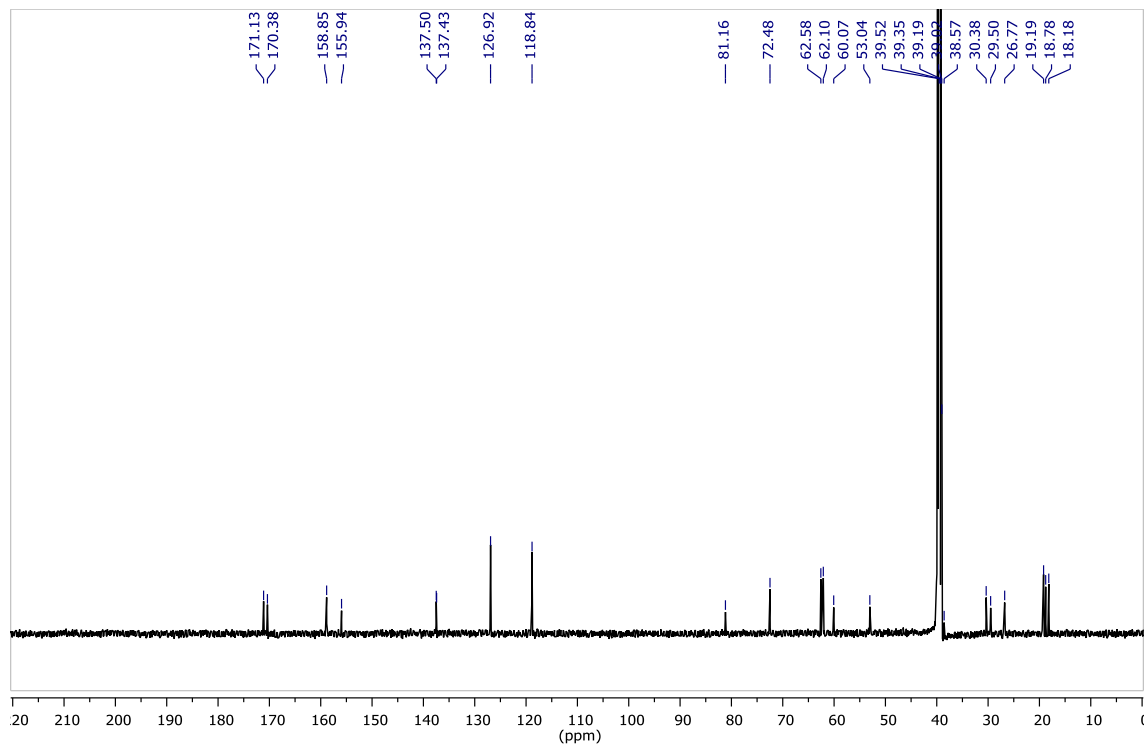

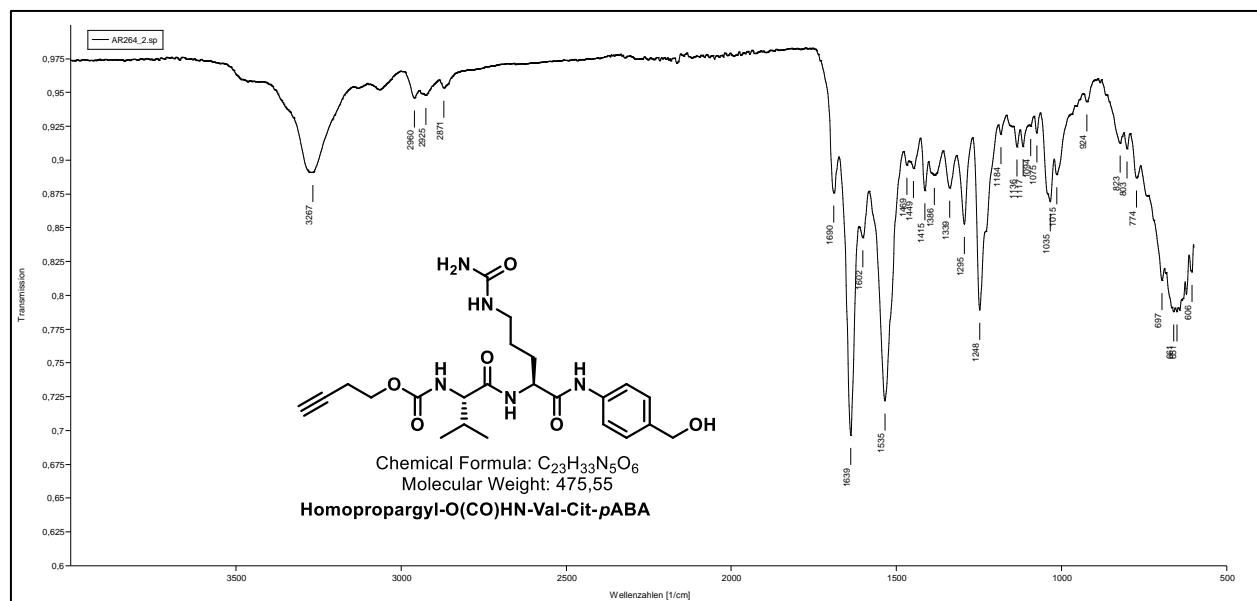

**Homopropargyl-O(CO)HN-Val-Cit-pABO(CO)O(4-NO<sub>2</sub>-Ph) (28) – But-3-yn-1-yl ((S)-3-methyl-1-(((S)-1-((4-((4-nitrophenoxy)carbonyloxy)methyl)phenyl)amino)-1-oxo-5-ureidopentan-2-yl)amino)-1-oxobutan-2-yl)carbamate**

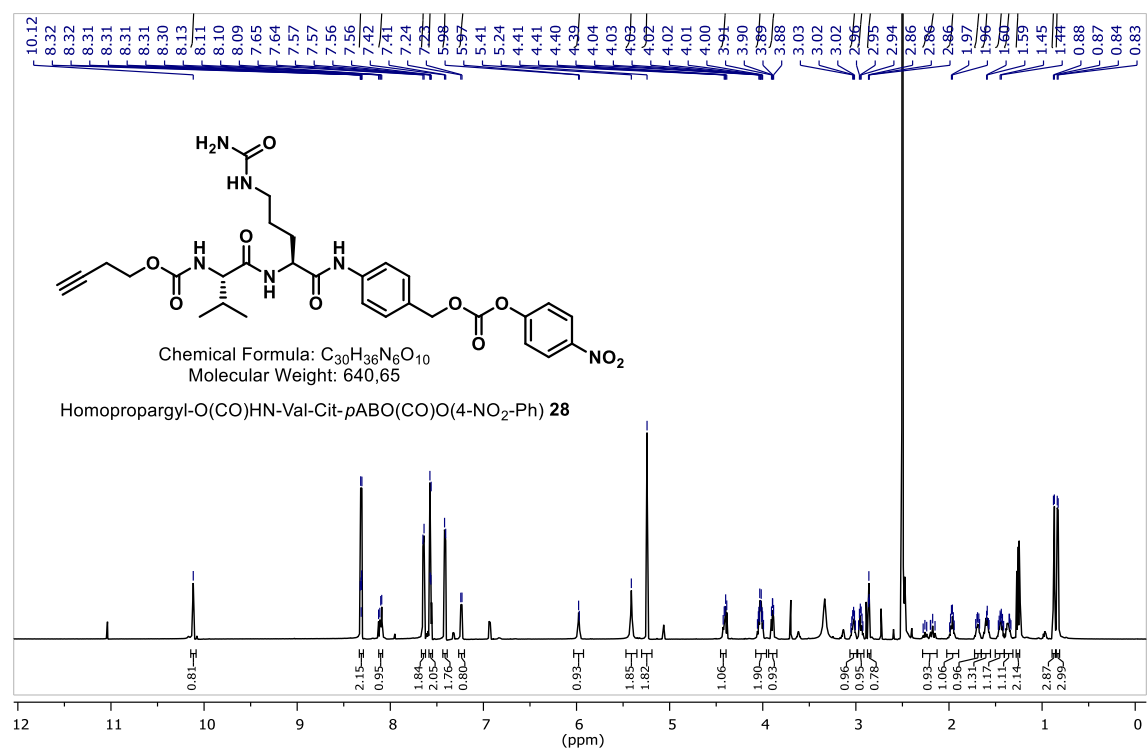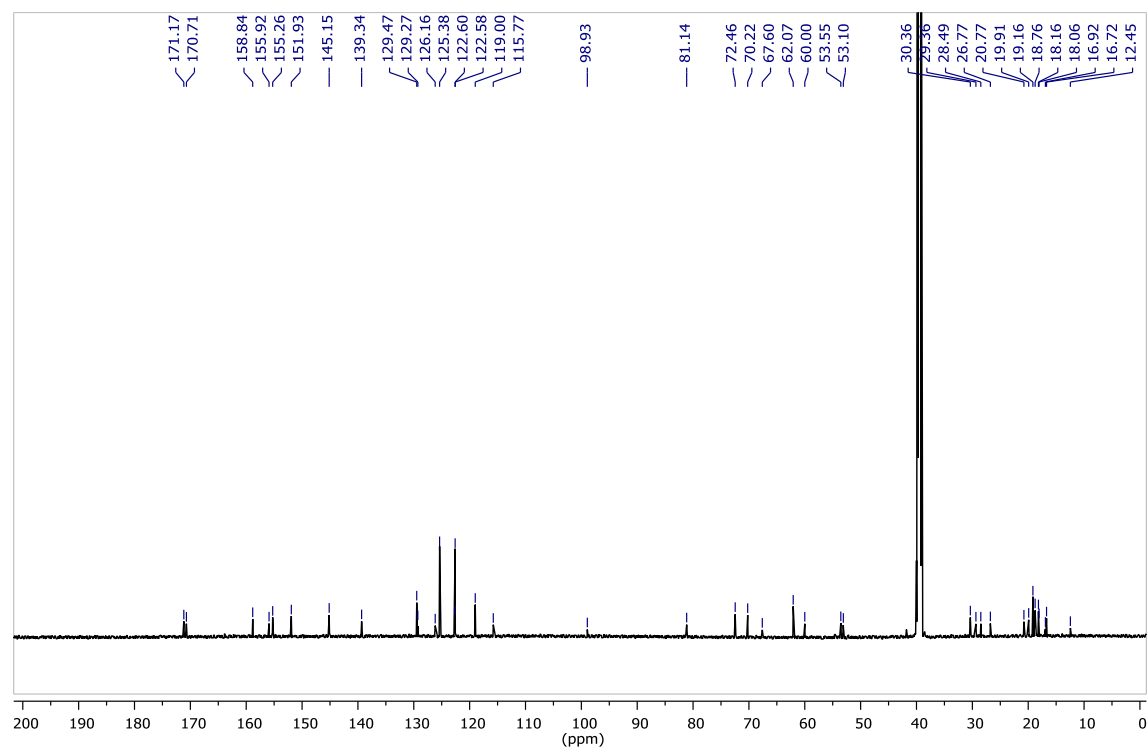

**Homopropargyl-O(CO)HN-Val-Cit-pABO(CO)-16R-Aminoratjadone (26)** – But-3-yn-1-yl ((S)-1-(((S)-1-((4-(((1R,2E,4E,7R,8Z,10E)-1-((2S,4R,5S,6S)-4-hydroxy-5-methyl-6-((E)-prop-1-en-1-yl)tetrahydro-2H-pyran-2-yl)-5,7,9-trimethyl-11-((R)-6-oxo-3,6-dihydro-2H-pyran-2-yl)undeca-2,4,8,10-tetraen-1-yl)carbamoyl)-oxy)methyl)phenyl)amino)-1-oxo-5-ureidopentan-2-yl)amino)-3-methyl-1-oxobutan-2-yl)carbamate

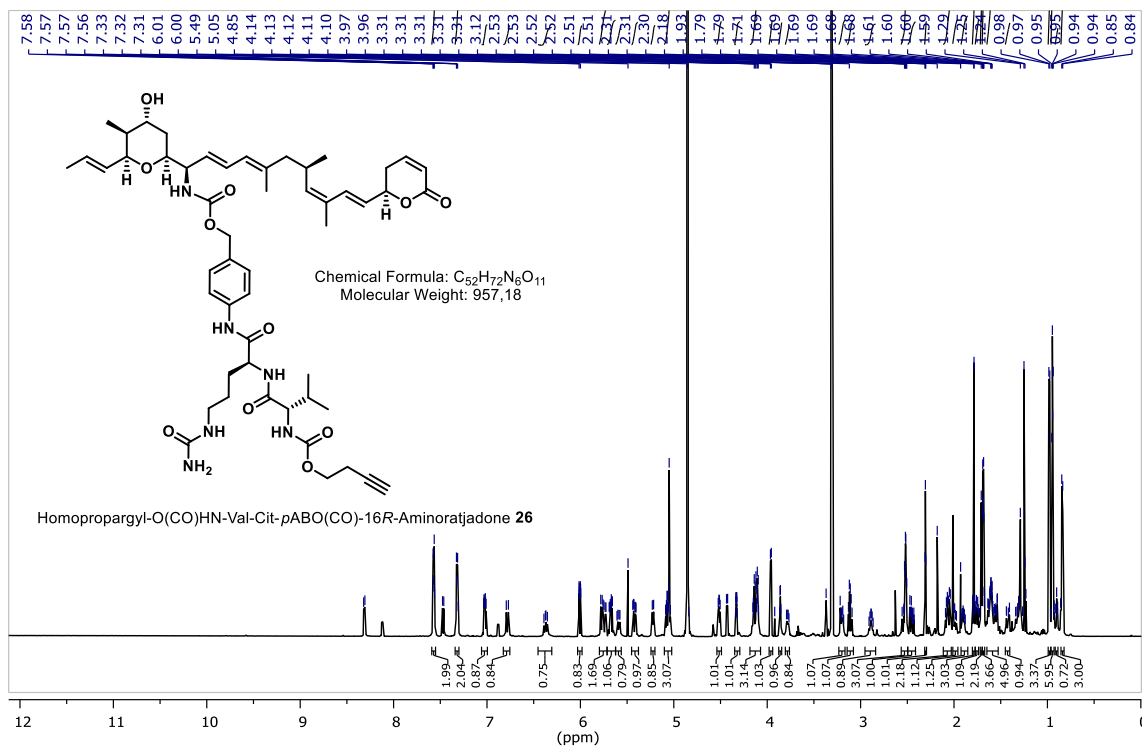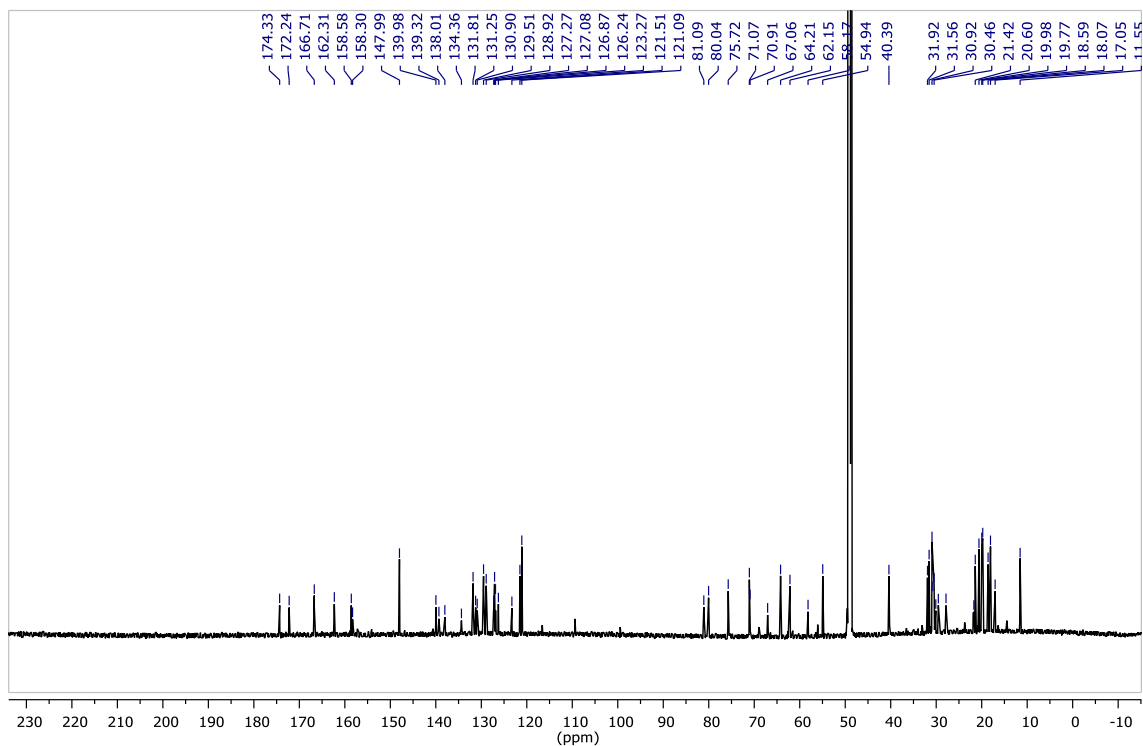

**2-PySS(CH<sub>2</sub>)<sub>2</sub>(CO)-16R-Aminoratjadone (31)** – N-((1R,2E,4E,7R,8Z,10E)-1-((2S,4R,5S,6S)-4-Hydroxy-5-methyl-6-((E)-prop-1-en-1-yl)tetrahydro-2H-pyran-2-yl)-5,7,9-trimethyl-11-((R)-6-oxo-3,6-dihydro-2H-pyran-2-yl)undeca-2,4,8,10-tetraen-1-yl)-3-(pyridin-2-yl)disulfaneyl)propenamide

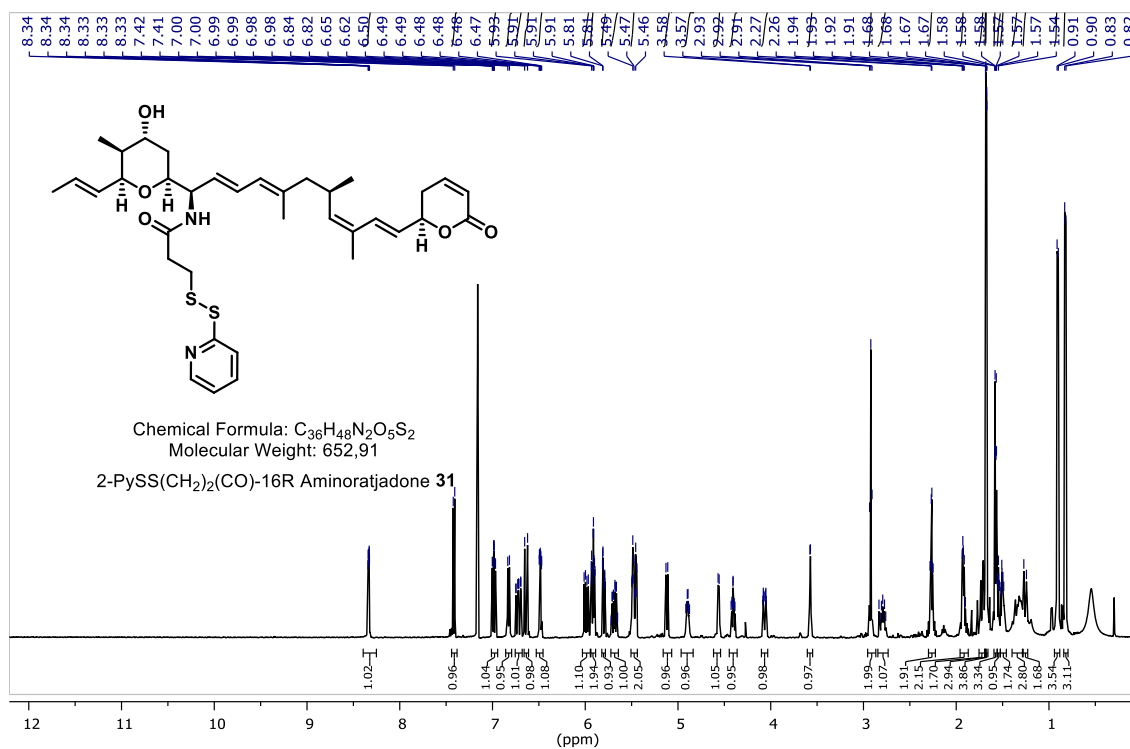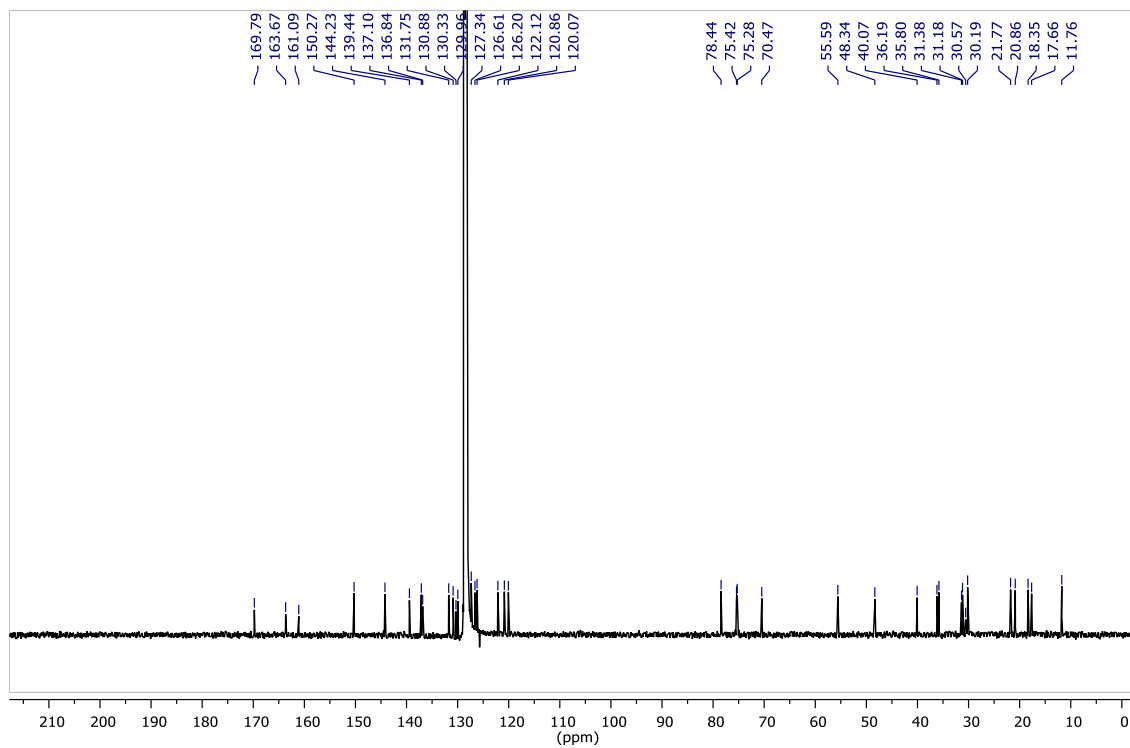

2-PySS(CH<sub>2</sub>)<sub>2</sub>NH<sub>2</sub> – 2-(pyridin-2-ylsulfaneyl)ethan-1-amine hydrochloride

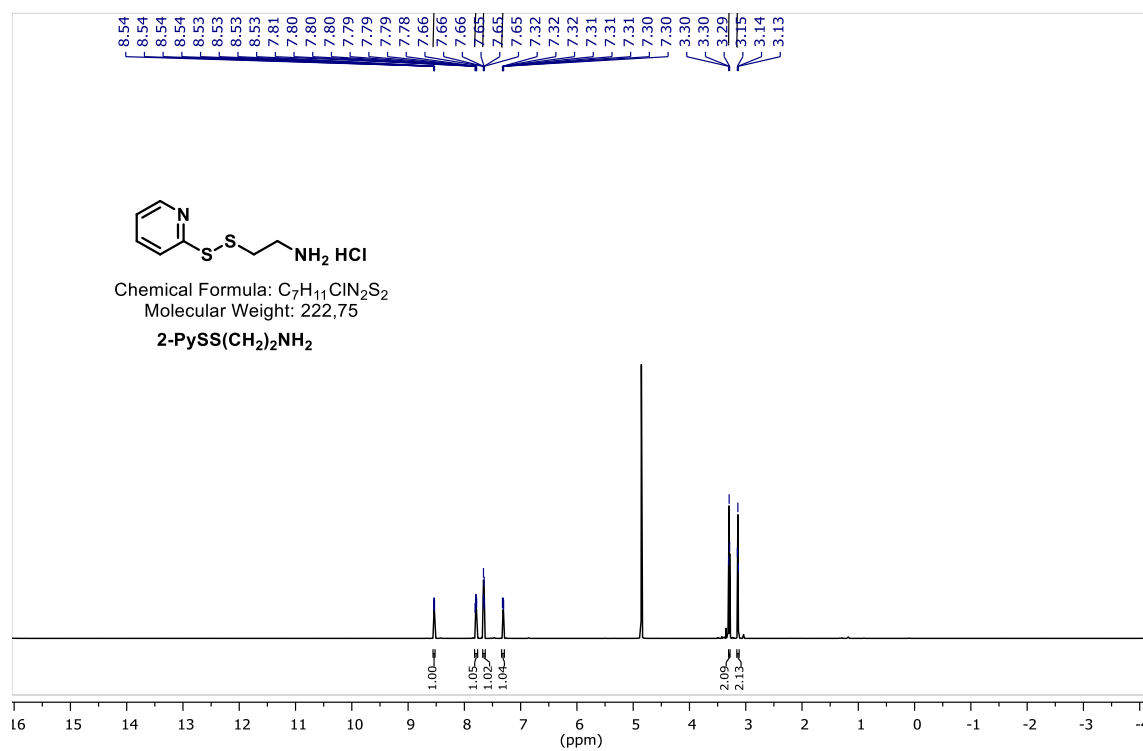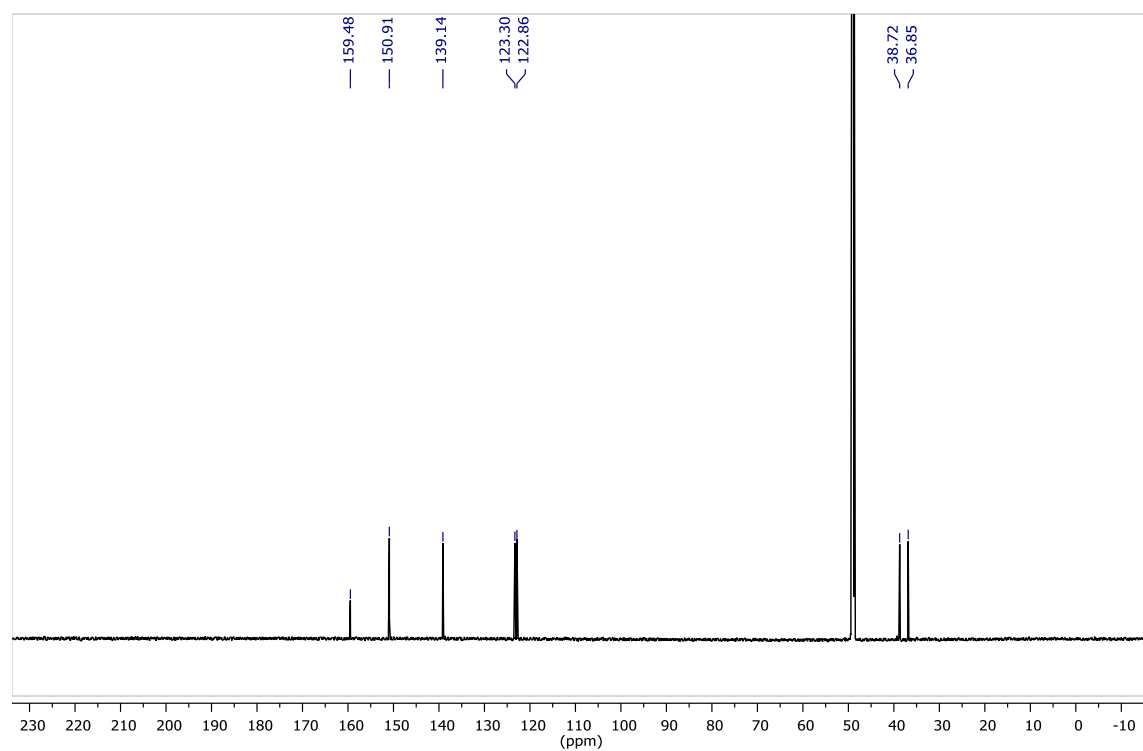

**2-PySS(CH<sub>2</sub>)<sub>2</sub>NH-(CO)(CH<sub>2</sub>)<sub>2</sub>CCH (32) – N-(2-(pyridin-2-yl)disulfaneyl)ethylpent-4-ynamide**

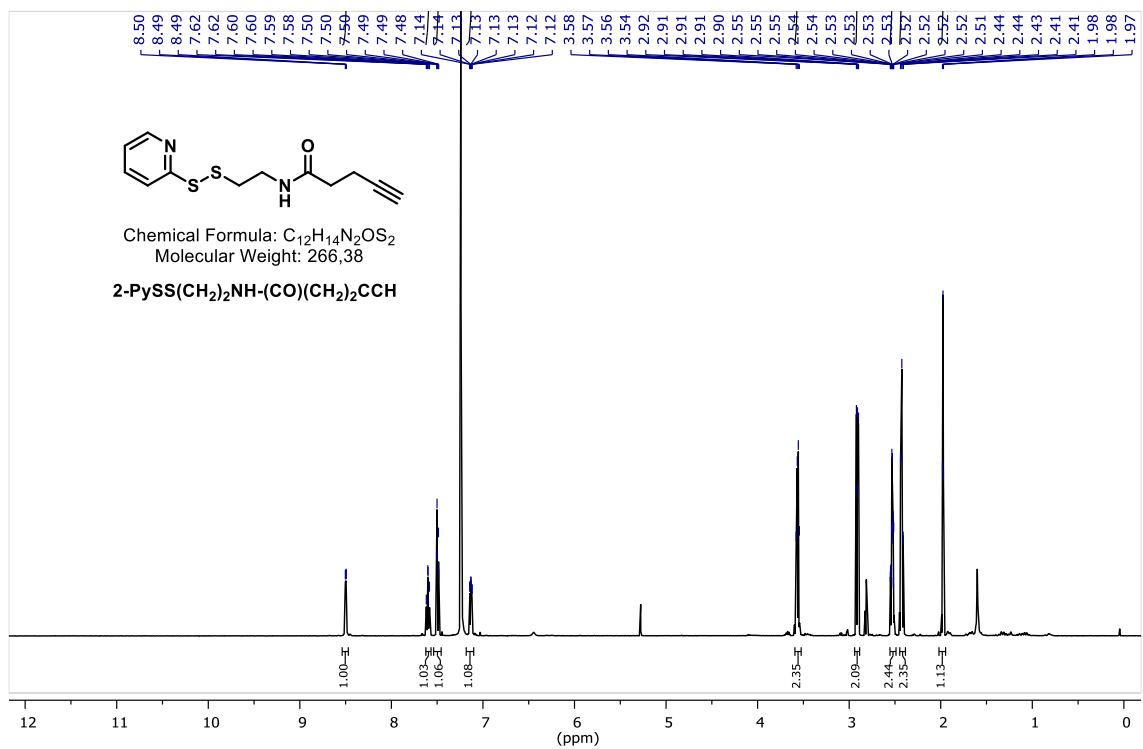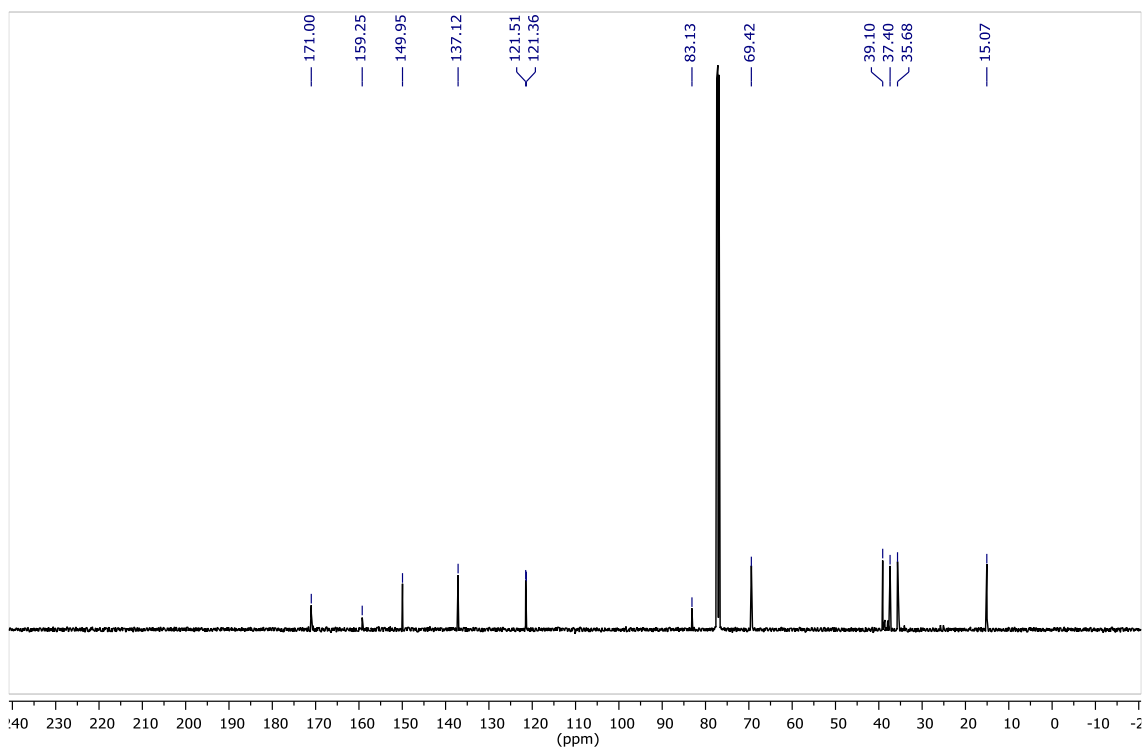

$\text{HO}_2\text{C}(\text{CH}_2)_2\text{SS}(\text{CH}_2)_2\text{NH}-(\text{CO})(\text{CH}_2)_2\text{CCH}$  (**30**) – 3-((2-(pent-4-ynamido)ethyl)-disulfaneyl)propanoic acid

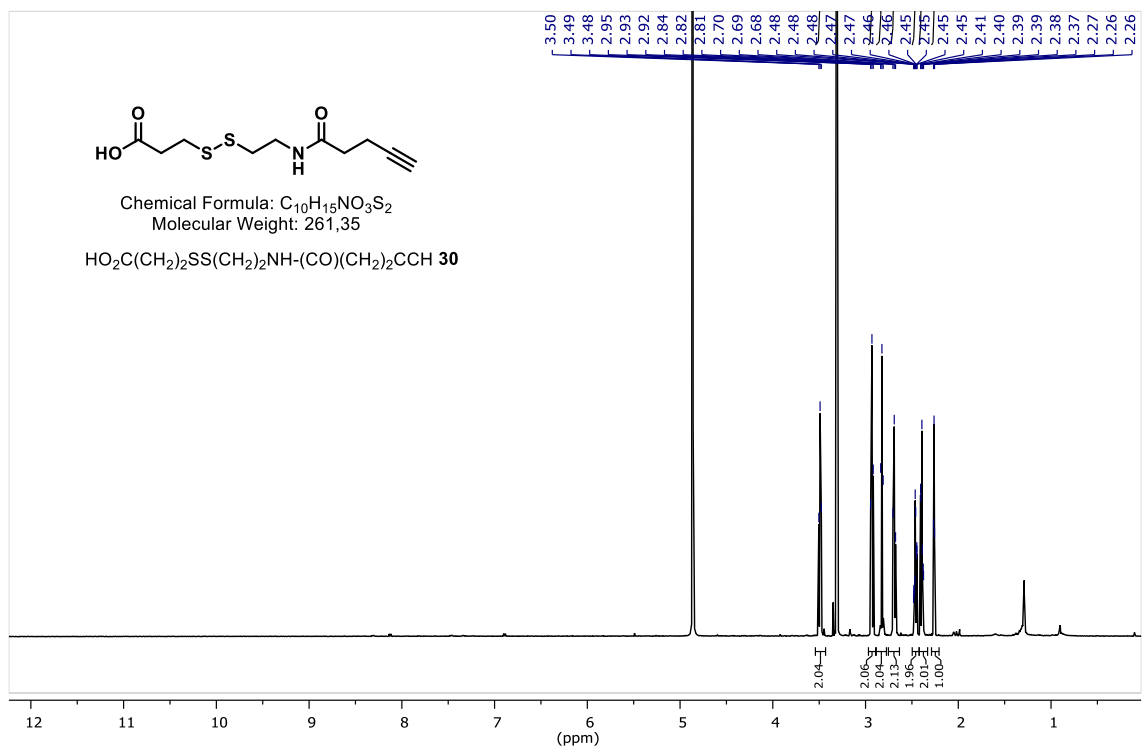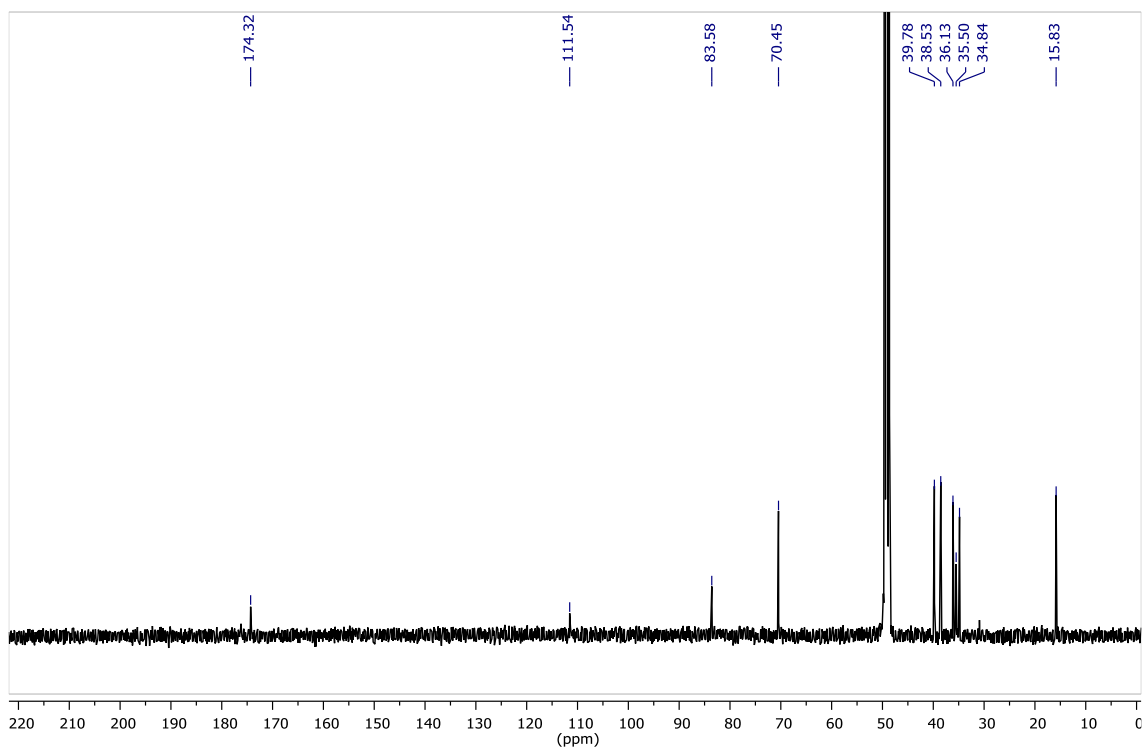



**HCC(CH<sub>2</sub>)<sub>2</sub>(CO)-NH-(CH<sub>2</sub>)<sub>2</sub>SS(CH<sub>2</sub>)<sub>2</sub>(CO)-16R-Aminoratjadone (29)** – N-(2-((3-(((1R,2E,4E,7R,8Z,10E)-1-((2S,4R,5S,6S)-4-hydroxy-5-methyl-6-((E)-prop-1-en-1-yl)tetrahydro-2H-pyran-2-yl)-5,7,9-trimethyl-11-((R)-6-oxo-3,6-dihydro-2H-pyran-2-yl)undeca-2,4,8,10-tetraen-1-yl)amino)-3-oxopropyl)disulfaneyl)-ethyl)pent-4-ynamide

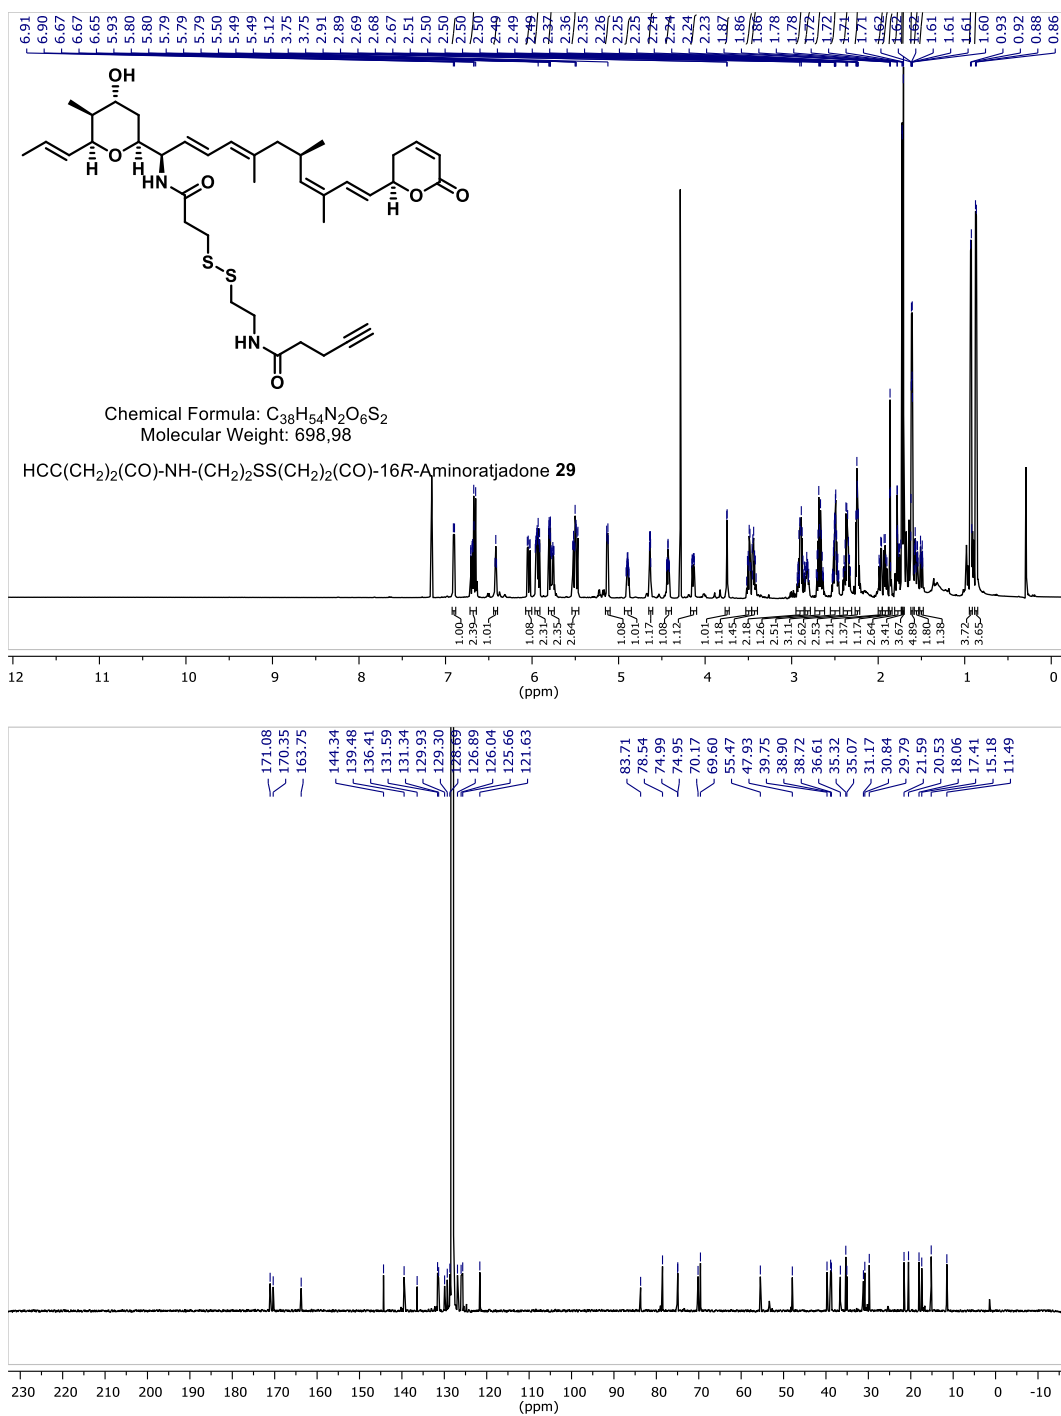

**19-Aminoratjadone (33)** - (6R)-6-((1E,3Z,5R,7E,9E,11R)-11-((2S,5S,6S)-4-amino-5-methyl-6-((E)-prop-1-en-1-yl)tetrahydro-2H-pyran-2-yl)-11-hydroxy-5,7-dimethylundeca-1,3,7,9-tetraen-1-yl)-5,6-dihydro-2H-pyran-2-one

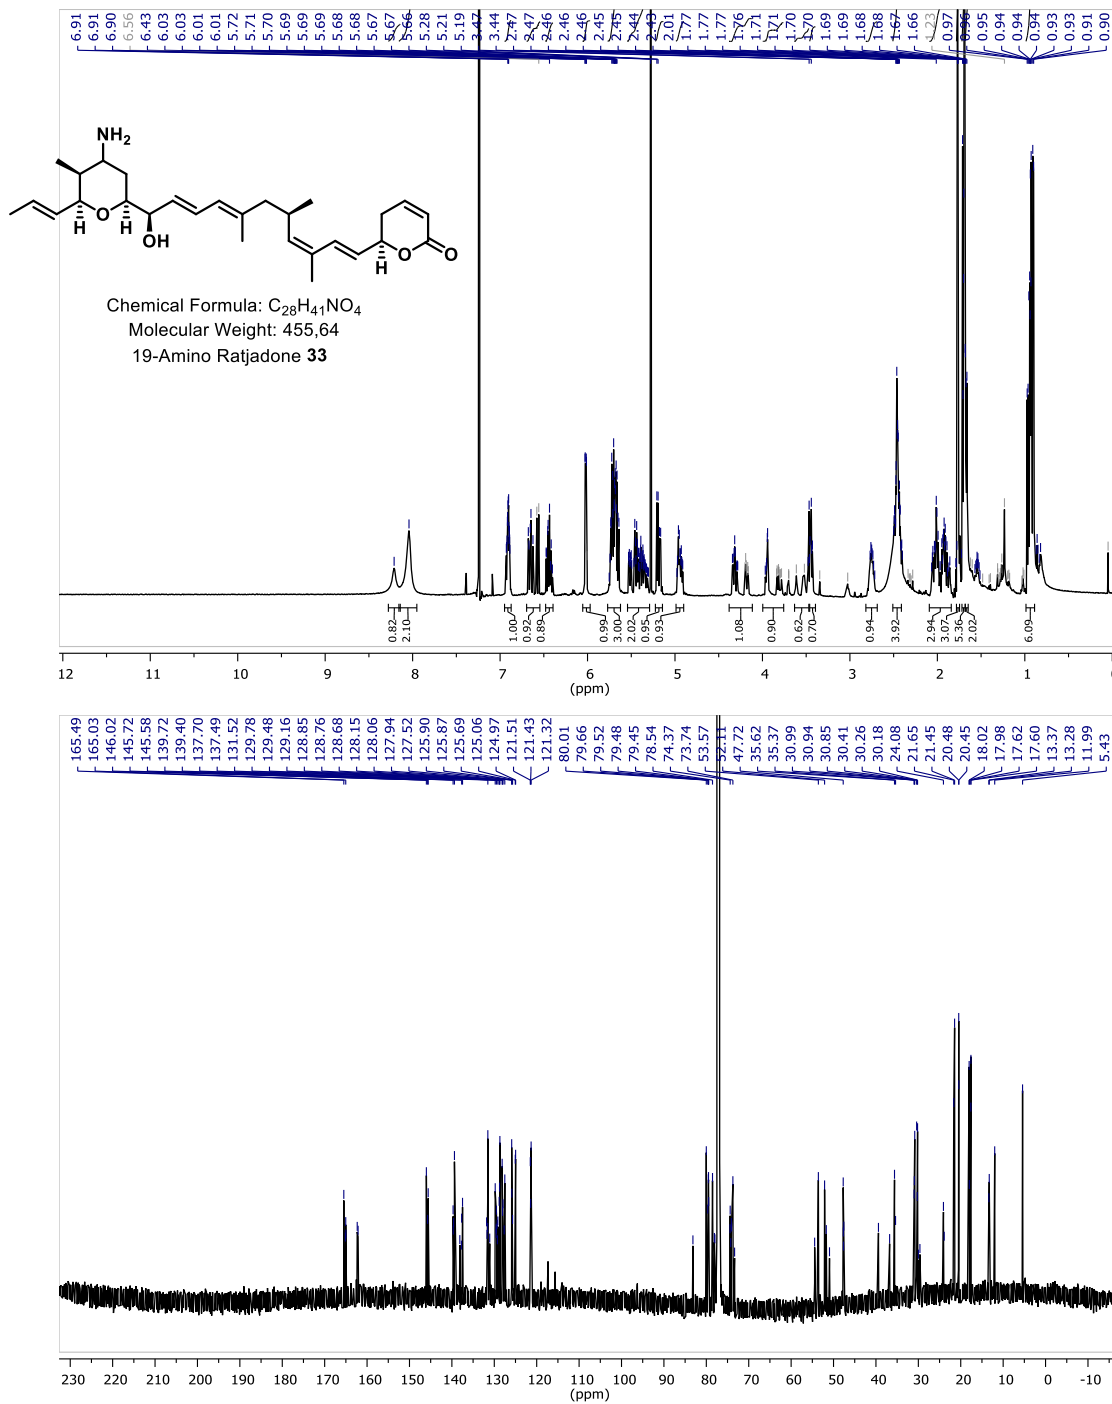

**Compound 34** - But-3-yn-1-yl ((2S,3S,6S)-6-((1S,2E,4E,7R,8Z,10E)-1-hydroxy-5,7,9-trimethyl-11-((R)-6-oxo-3,6-dihydro-2H-pyran-2-yl)undeca-2,4,8,10-tetraen-1-yl)-3-methyl-2-((E)-prop-1-en-1-yl)tetrahydro-2H-pyran-4-yl)carbamate

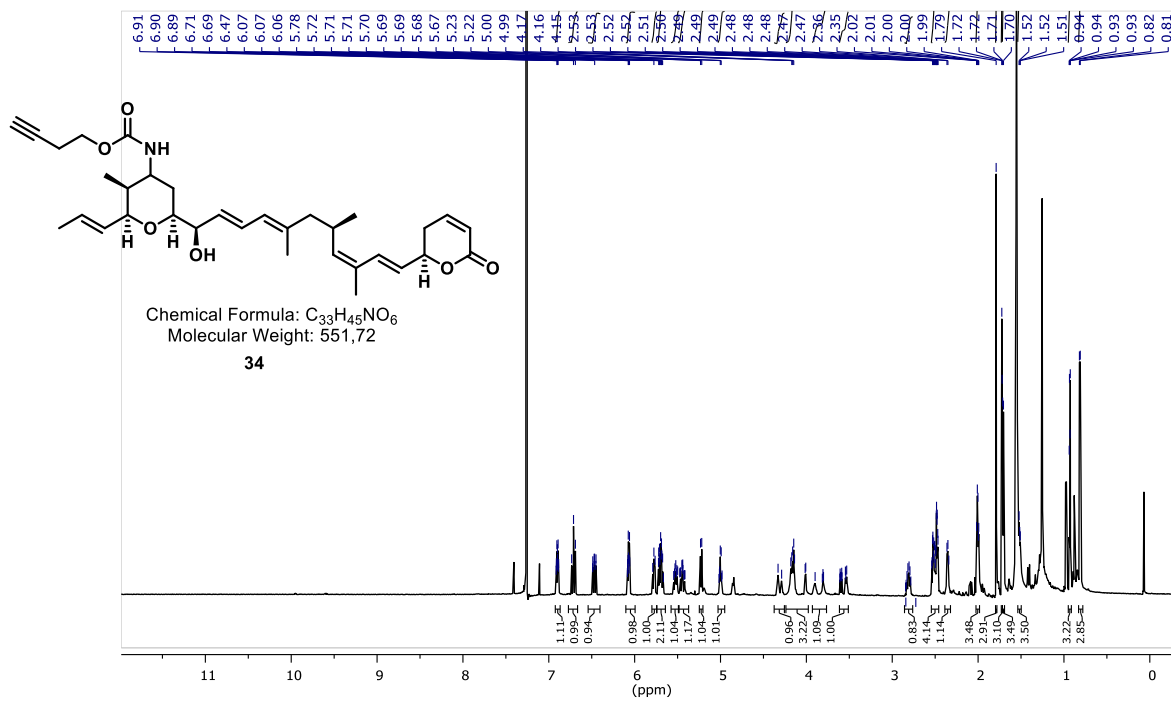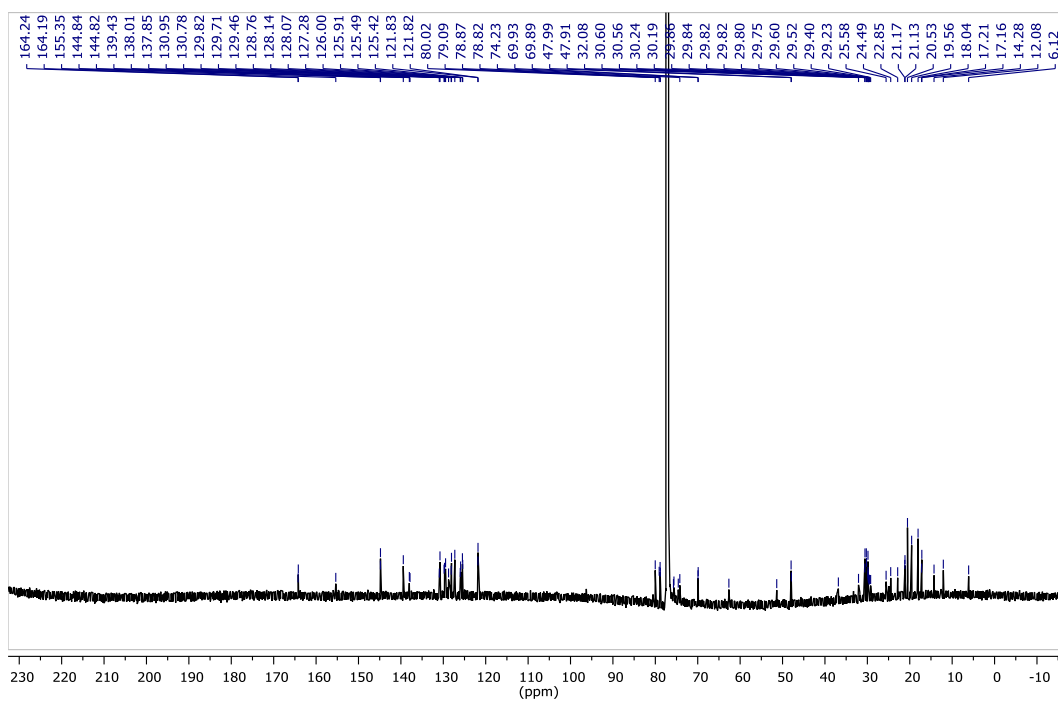

**N-Propargyl-19-Aminoratjadone (35)** - (6R)-6-((1E,3Z,5R,7E,9E,11R)-11-hydroxy-3,5,7-trimethyl-11-((2S,5S,6S)-5-methyl-6-((E)-prop-1-en-1-yl)-4-(prop-2-yn-1-ylamino)tetrahydro-2H-pyran-2-yl)undeca-1,3,7,9-tetraen-1-yl)-5,6-dihydro-2H-pyran-2-one

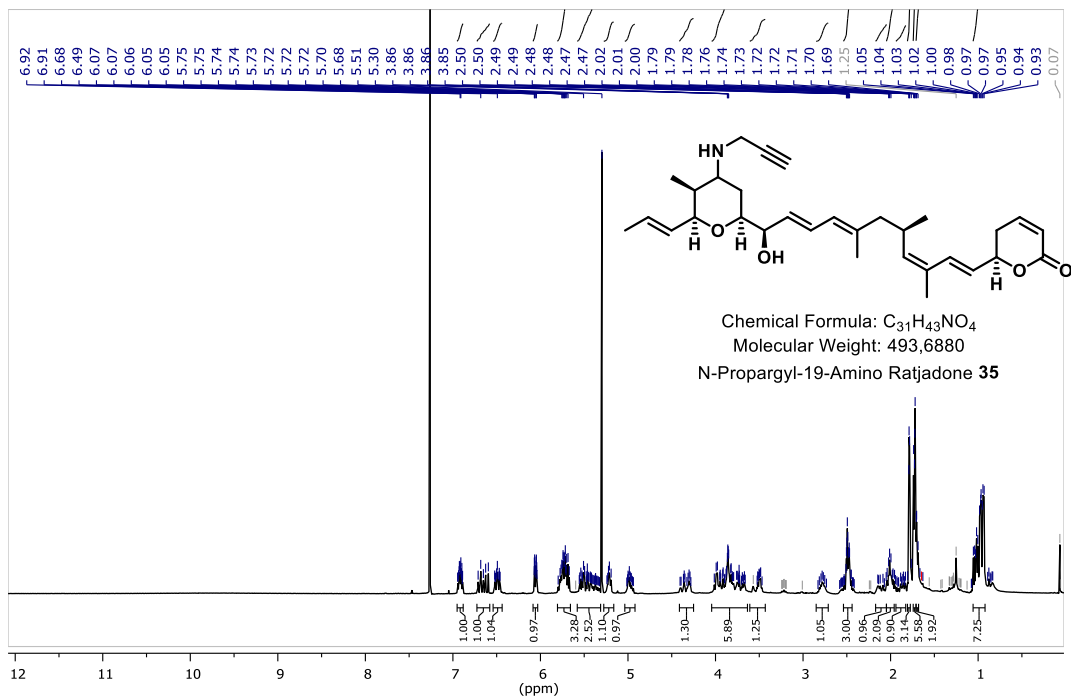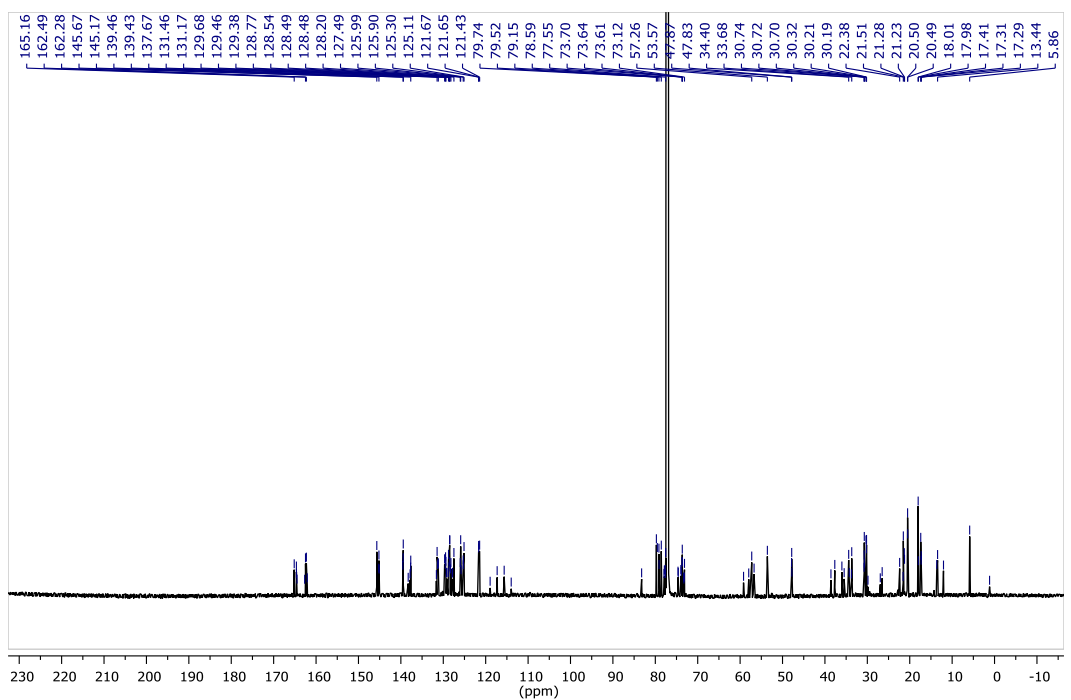

Methyl N<sup>2</sup>-(((9H-fluoren-9-yl)methoxy)carbonyl)-N<sup>6</sup>-(tert-butoxycarbonyl)-L-lysinate (37)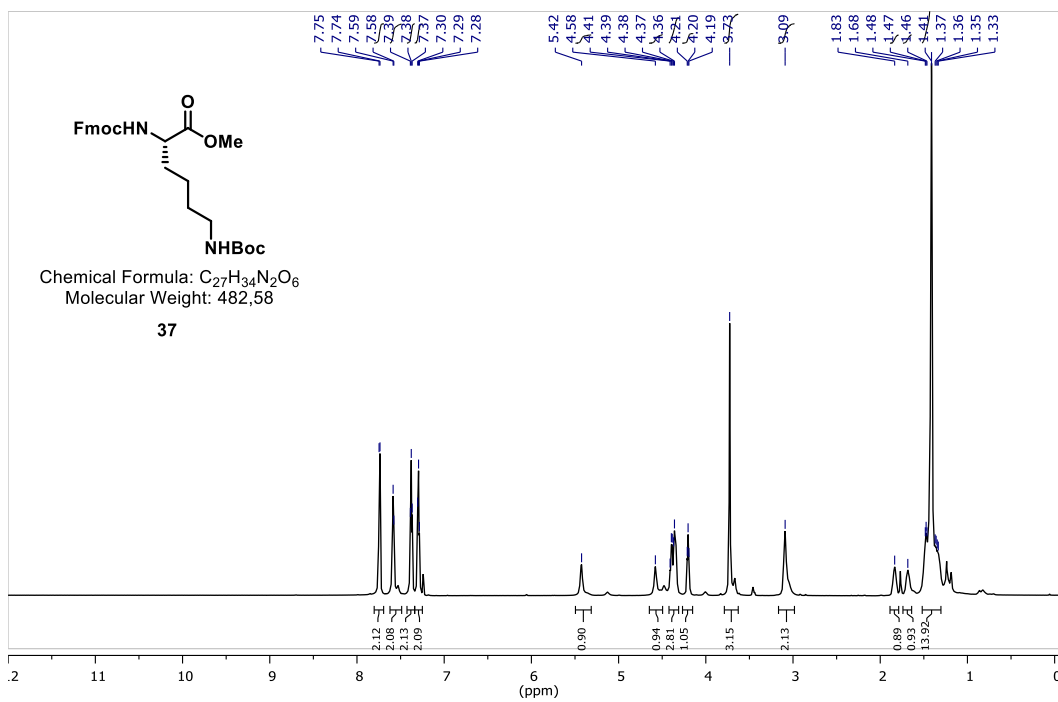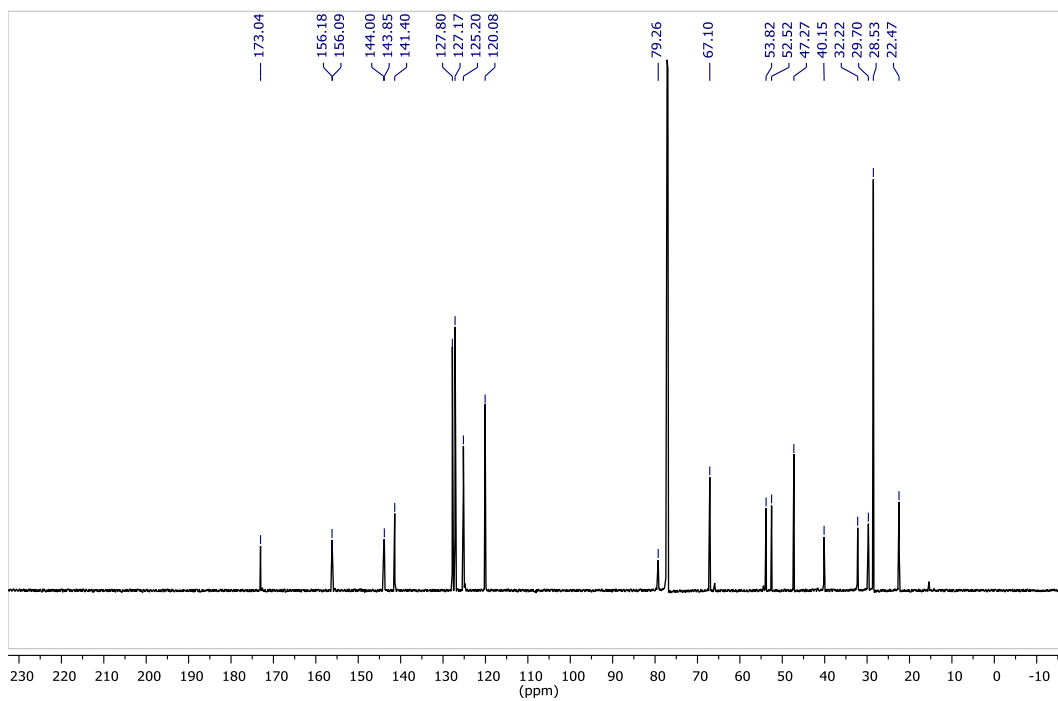

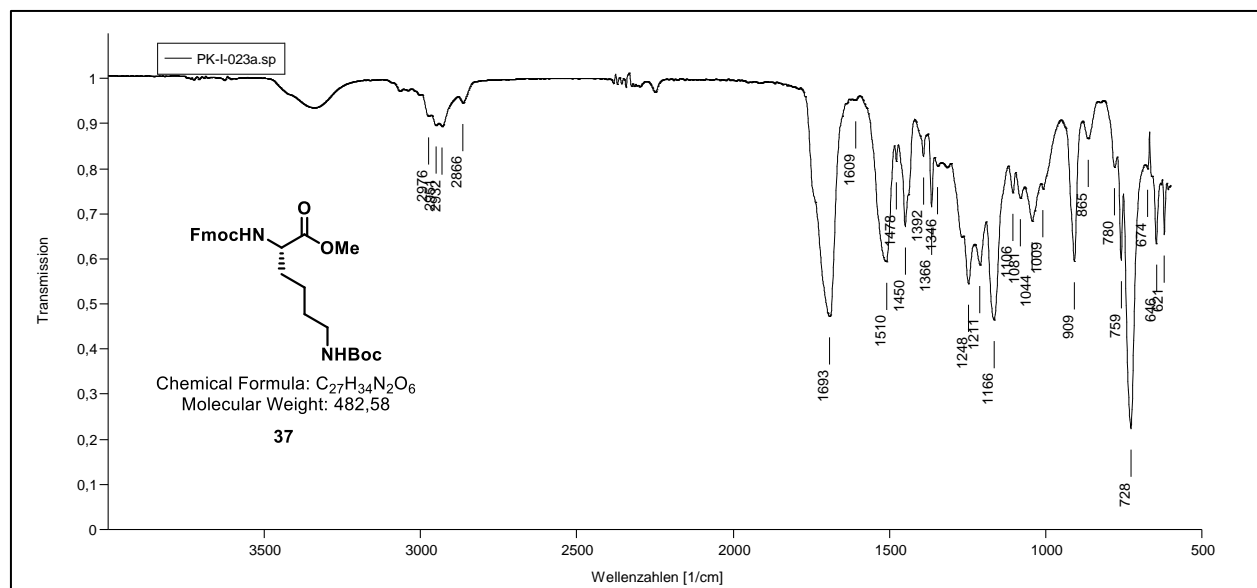

Methyl N<sup>2</sup>-((S)-4-(((9H-fluoren-9-yl)methoxy)carbonyl)amino)-5-(tert-butoxy)-5-oxopentanoyl)-N<sup>6</sup>-  
(tert-butoxycarbonyl)-L-lysinate (**38**)

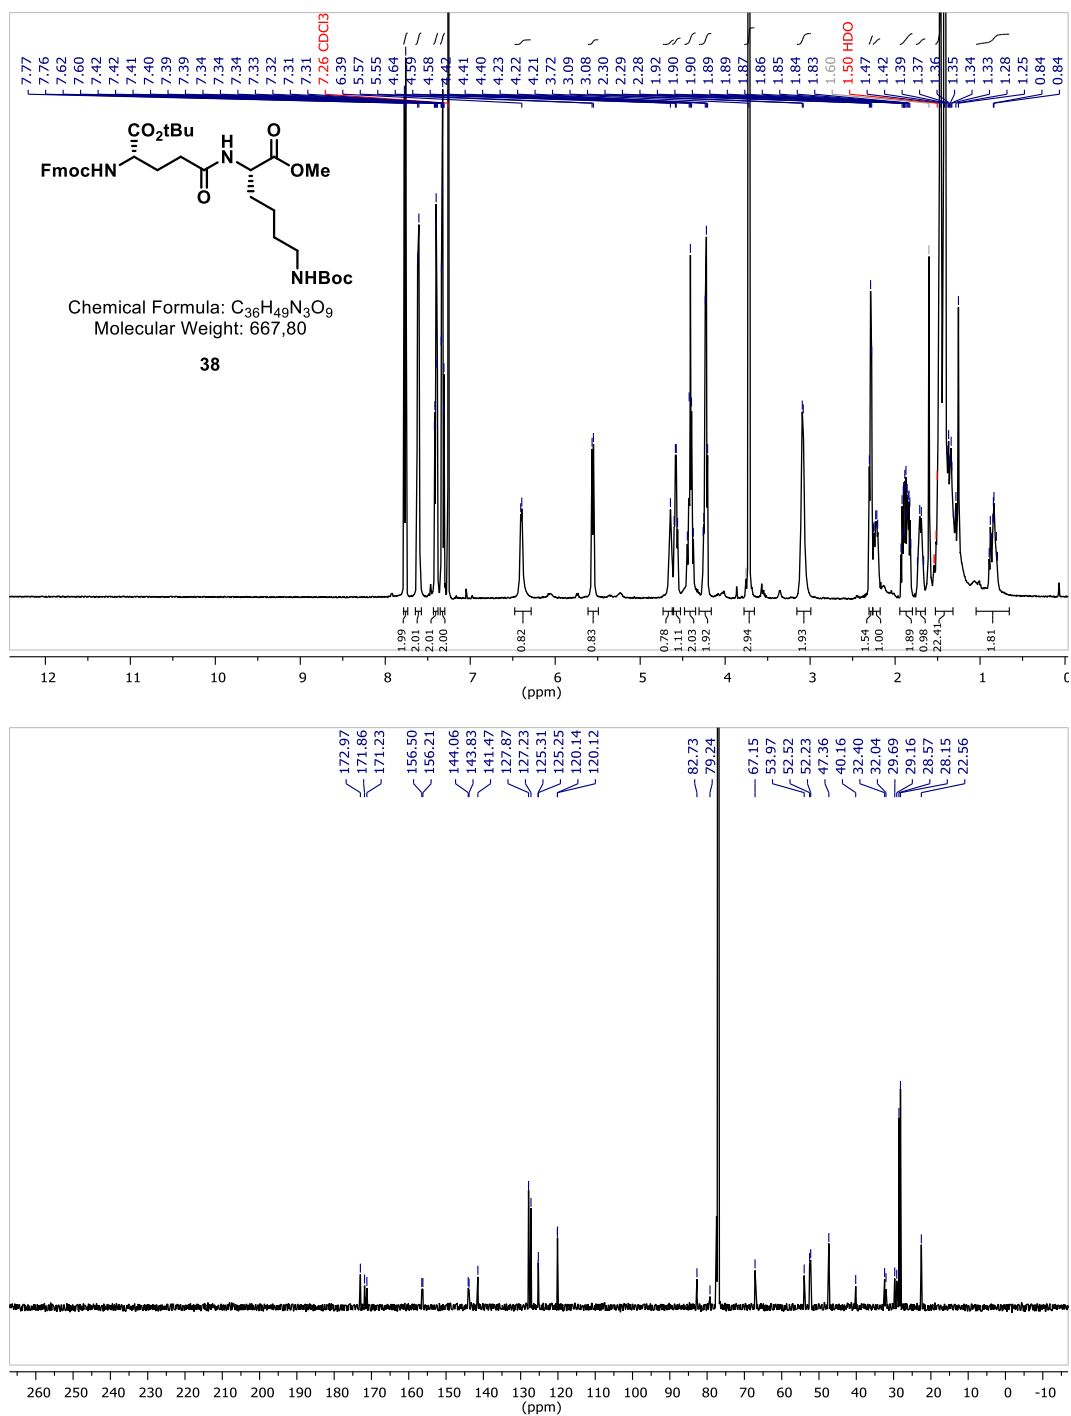

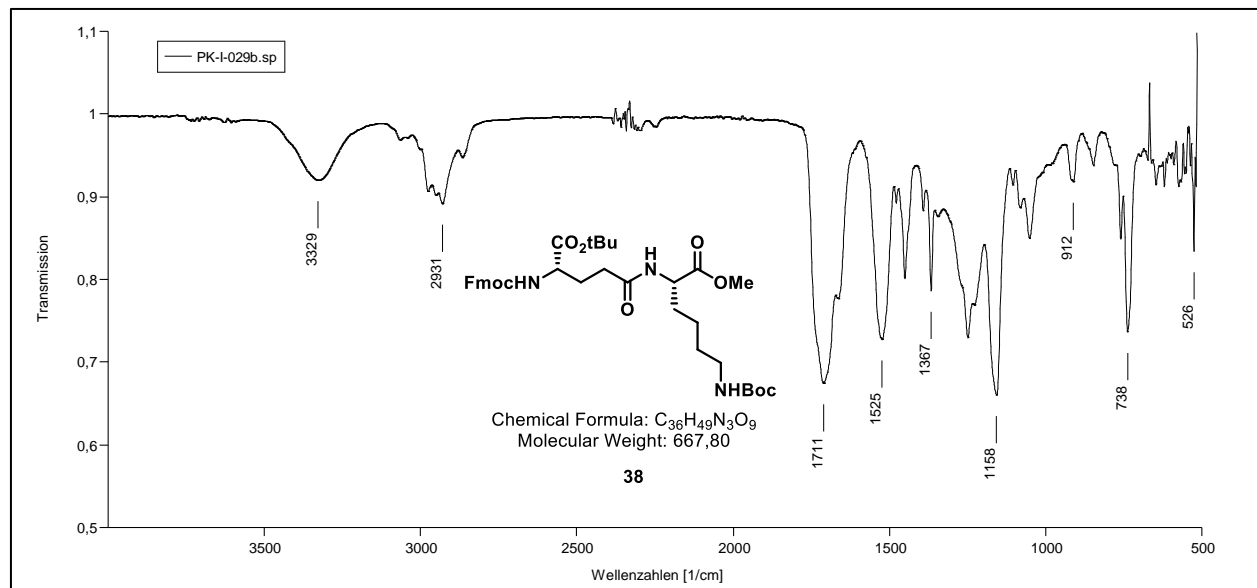



Methyl N<sup>2</sup>-(((9H-fluoren-9-yl)methoxy)carbonyl)-N<sup>5</sup>-((S)-6-(4-azidobenzamido)-1-methoxy-1-oxohexan-2-yl)-L-glutamine (39)

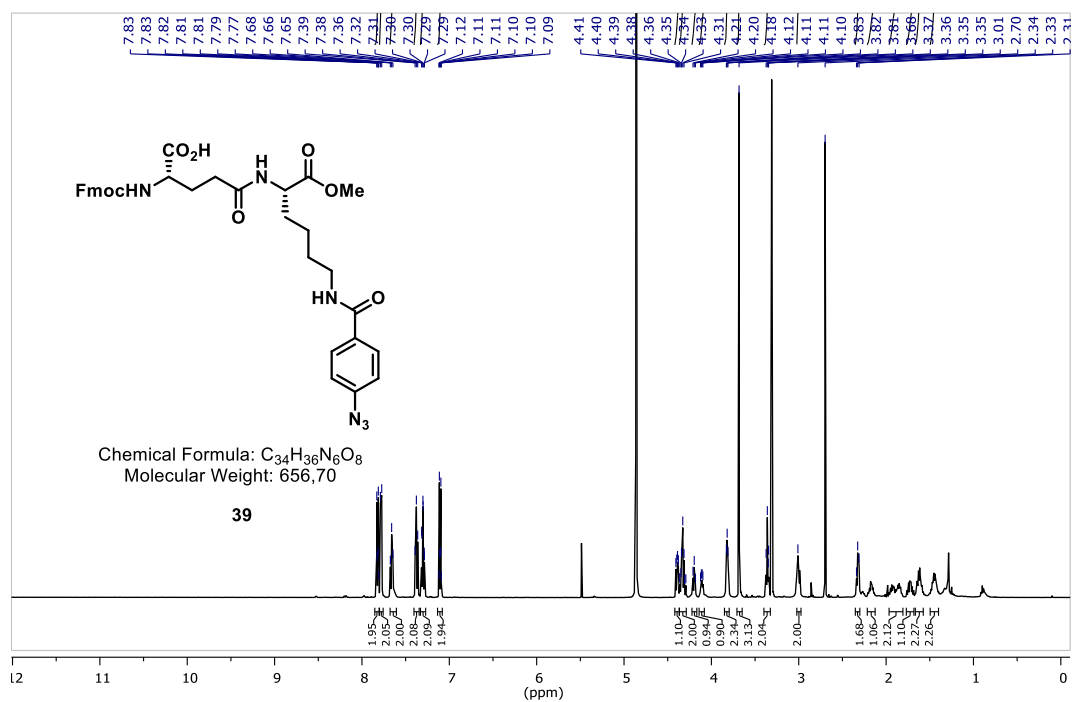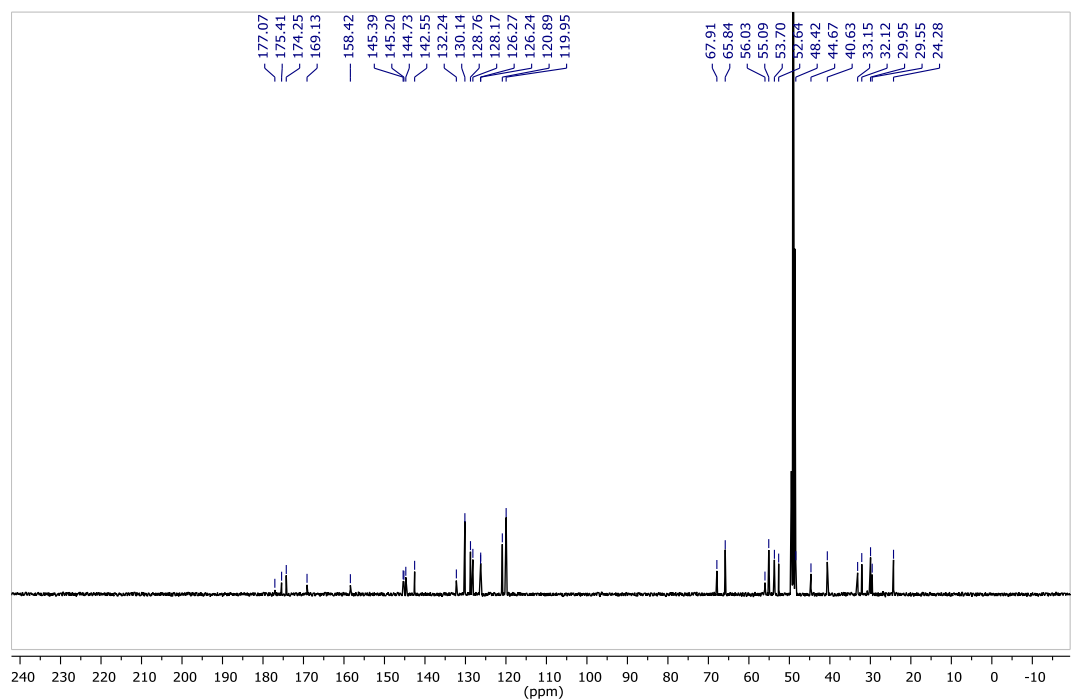

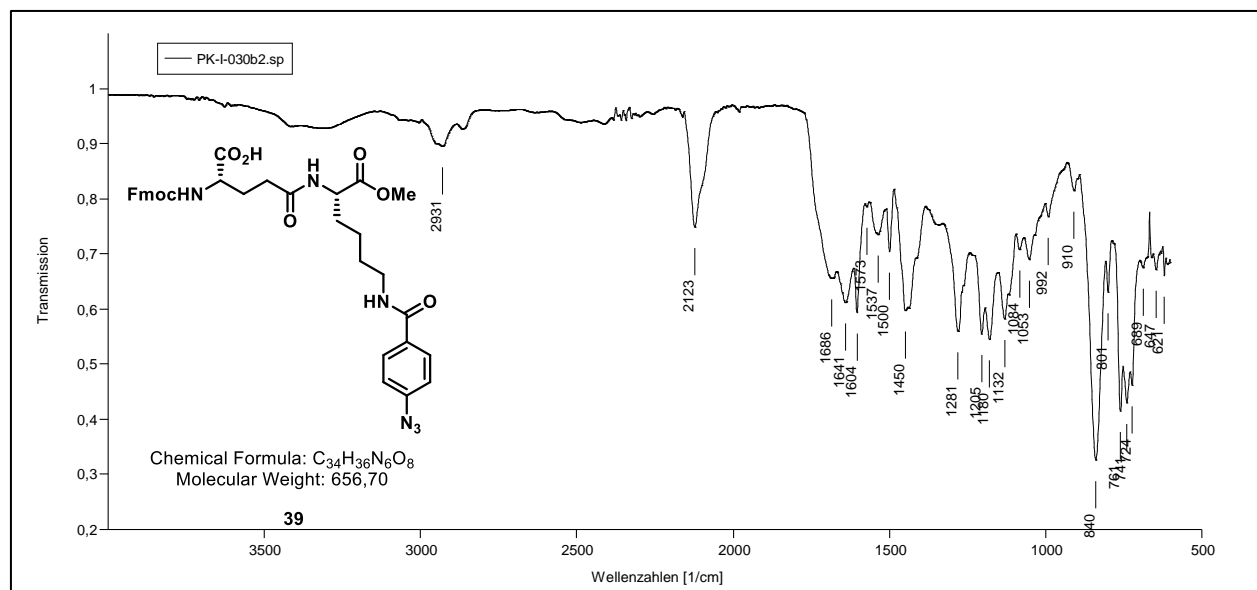

**Fa-N<sub>3</sub>-1** - N<sup>2</sup>-(4-(((2-amino-4-hydroxypteridin-6-yl)methyl)amino)benzoyl)-N<sup>5</sup>-(((S)-4-(((S)-6-(4-azidobenzamido)-1-methoxy-1-oxohexan-2-yl)amino)-1-carboxy-4-oxobutyl)-L-glutamine

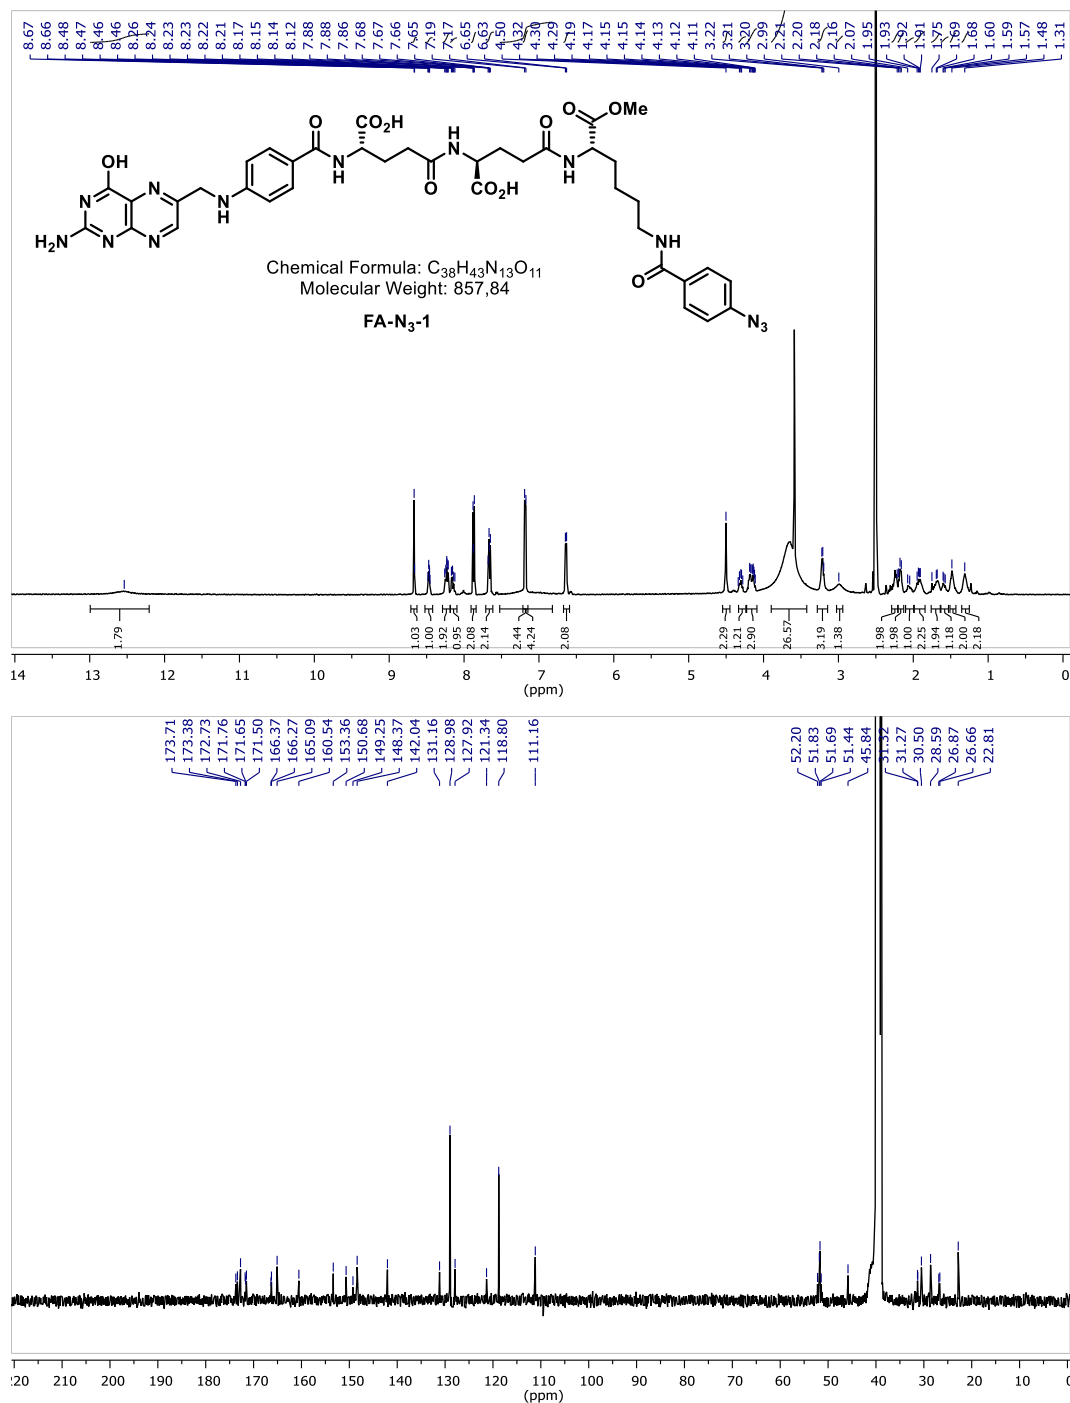

Methyl N<sup>2</sup>-(((9H-fluoren-9-yl)methoxy)carbonyl)-N<sup>6</sup>-(4-azidobenzoyl)-L-lysinate (40)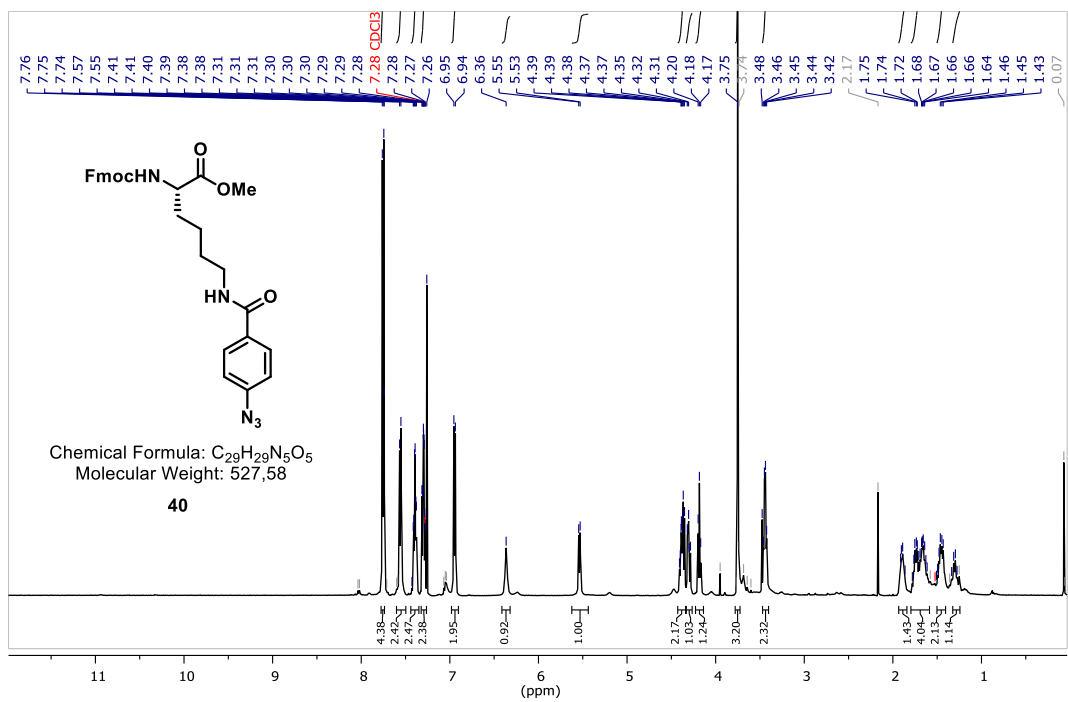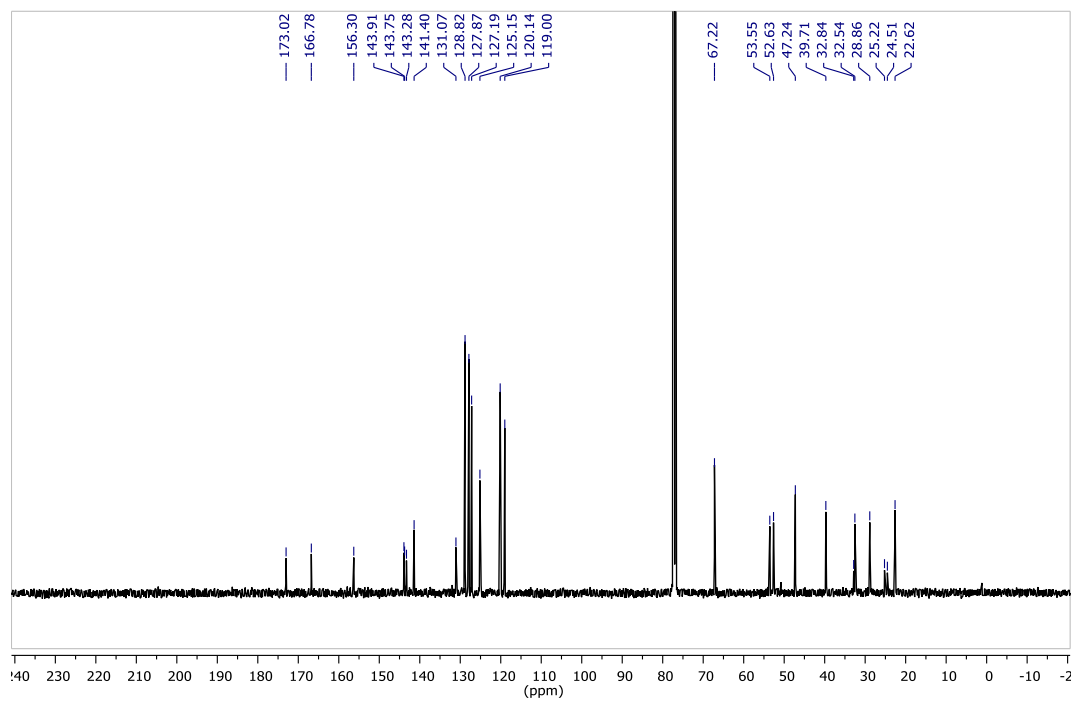

**Fmoc-(Asp(OtBu))<sub>3</sub>-OH** - (5S,8S,11S)-5,8,11-tris(2-(tert-butoxy)-2-oxoethyl)-1-(9H-fluoren-9-yl)-3,6,9-trioxo-2-oxa-4,7,10-triazadodecan-12-oic acid

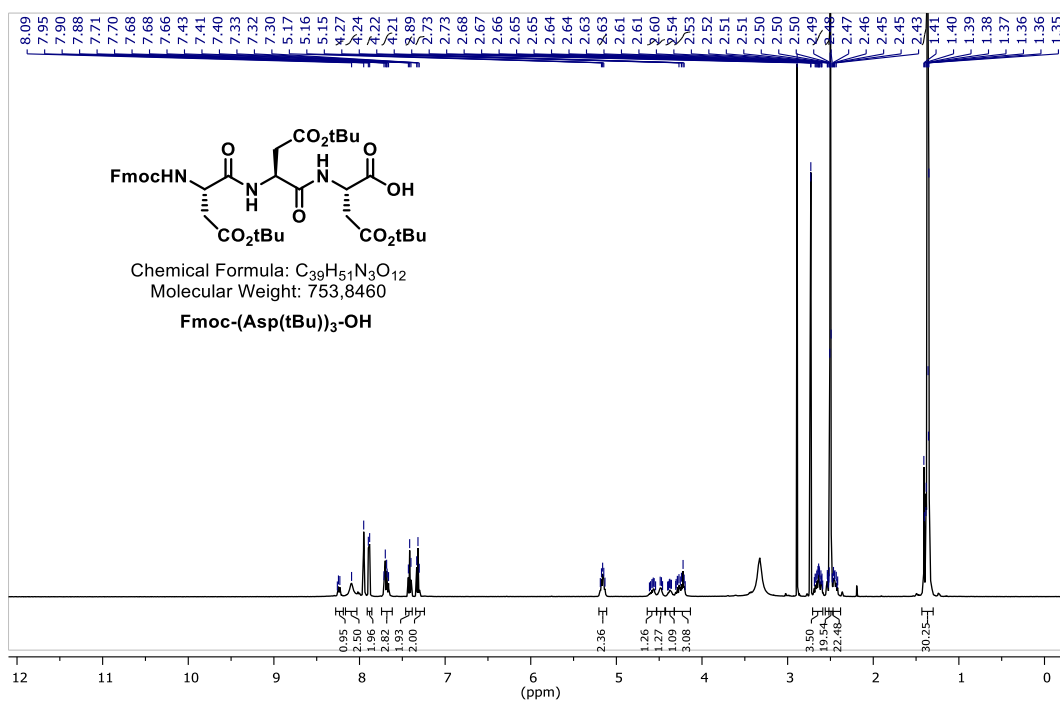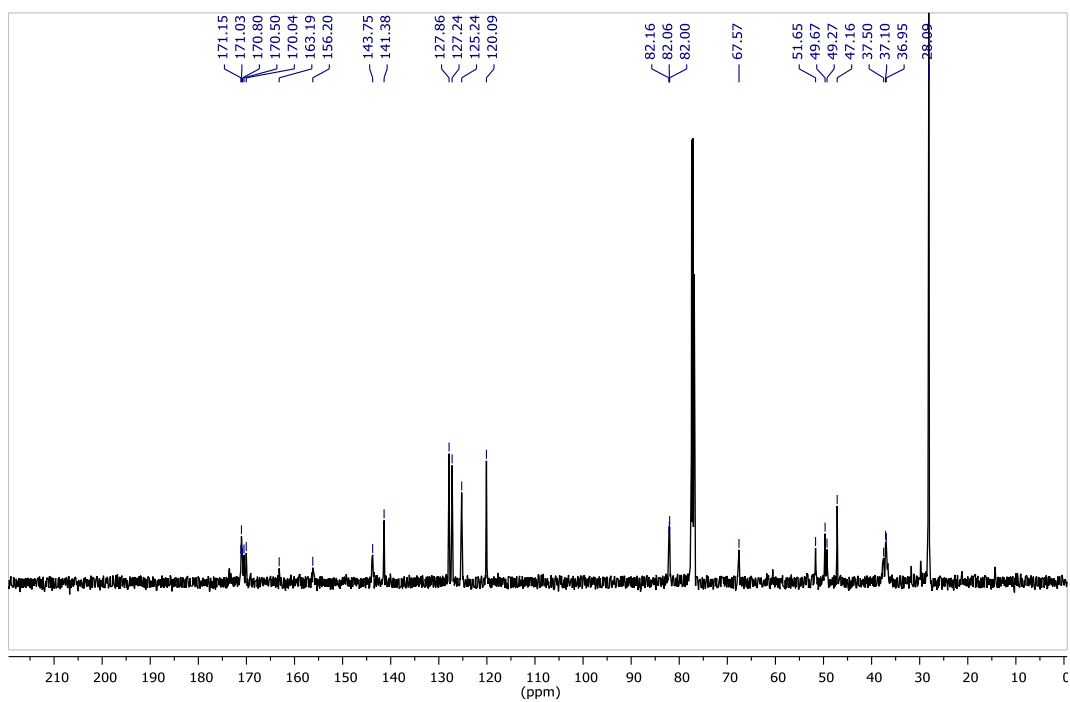

**(7S,10S,13S,16S)-16-(((9H-fluoren-9-yl)methoxy)carbonyl)amino)-1-(4-azidophenyl)-10,13-bis(carboxymethyl)-7-(methoxycarbonyl)-1,9,12,15-tetraoxo-2,8,11,14-tetraazaoctadecan-18-oic acid  
(41)**

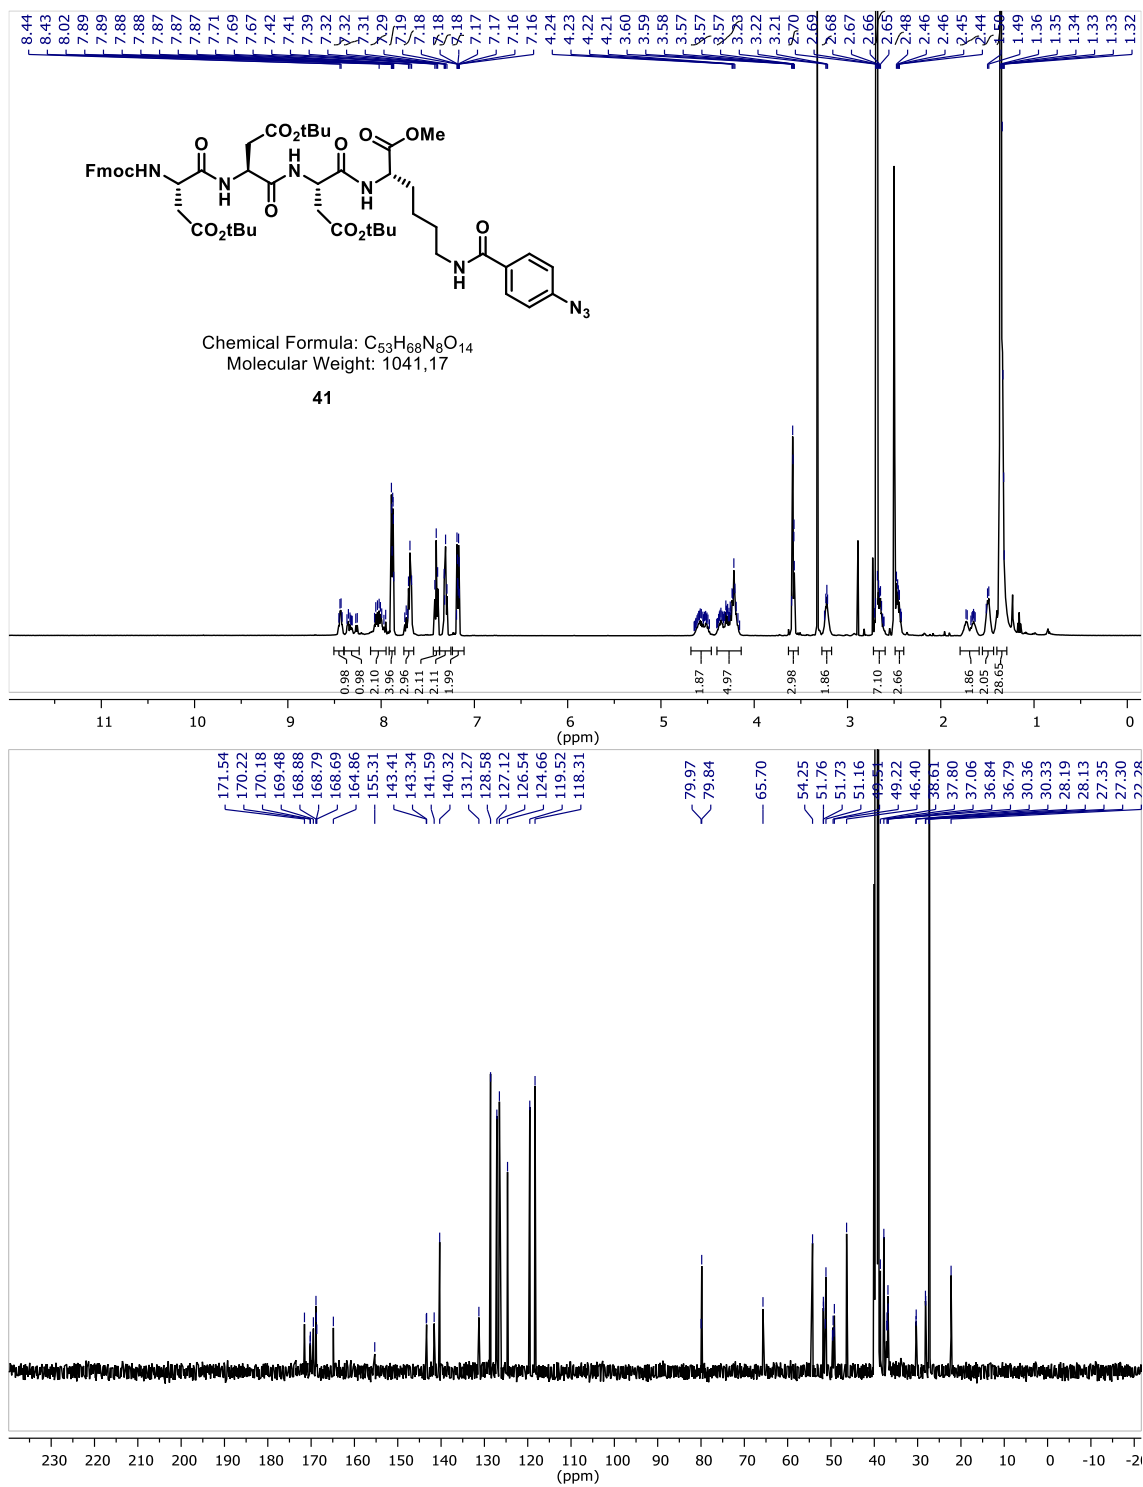

**FA-N<sub>3</sub>-2** - N<sup>2</sup>-(4-(((2-amino-4-hydroxypteridin-6-yl)methyl)amino)benzoyl)-N<sup>5</sup>-(((S)-1-(((S)-1-(((S)-1-(((S)-6-(4-azidobenzamido)-1-methoxy-1-oxohexan-2-yl)amino)-3-carboxy-1-oxopropan-2-yl)amino)-3-carboxy-1-oxopropan-2-yl)amino)-3-carboxy-1-oxopropan-2-yl)-L-glutamine

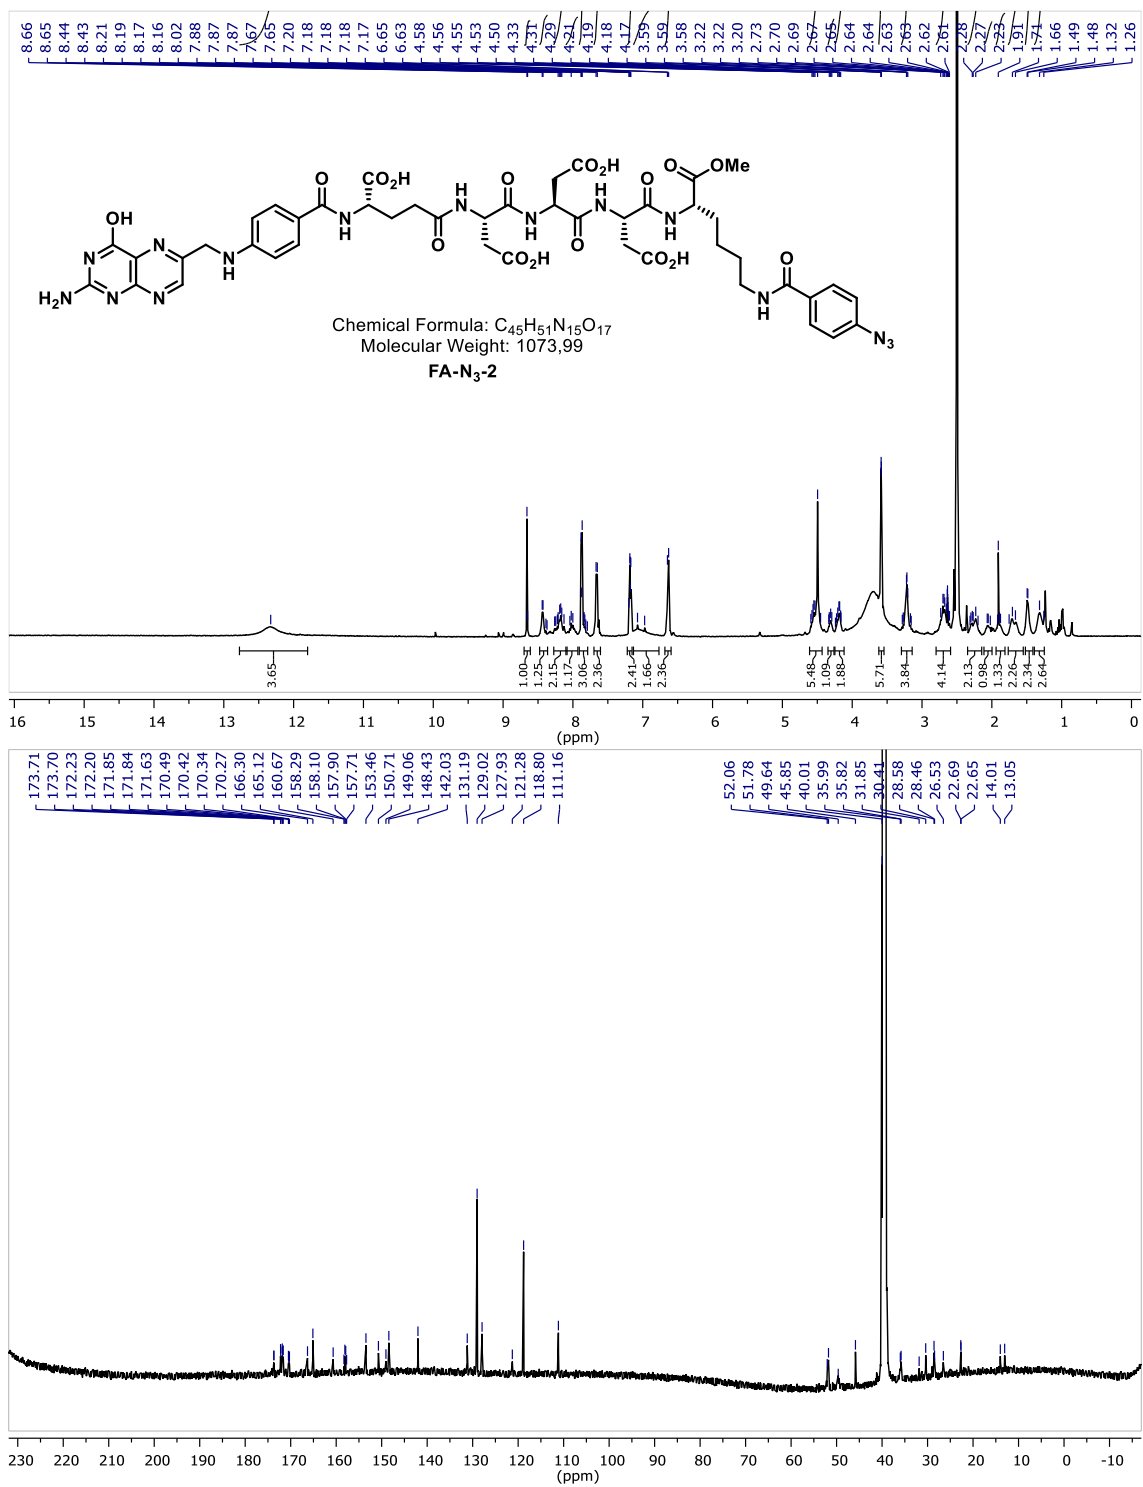

**N<sup>2</sup>-(((9H-fluoren-9-yl)methoxy)carbonyl)-N<sup>6</sup>-(4-azidobenzoyl)-L-lysine**

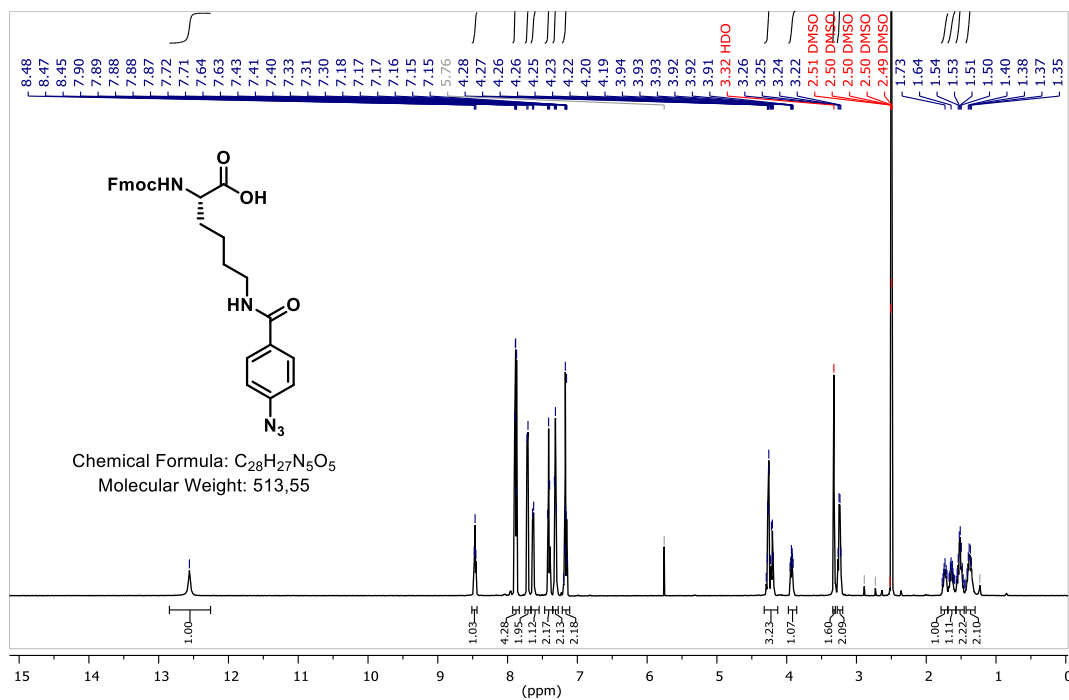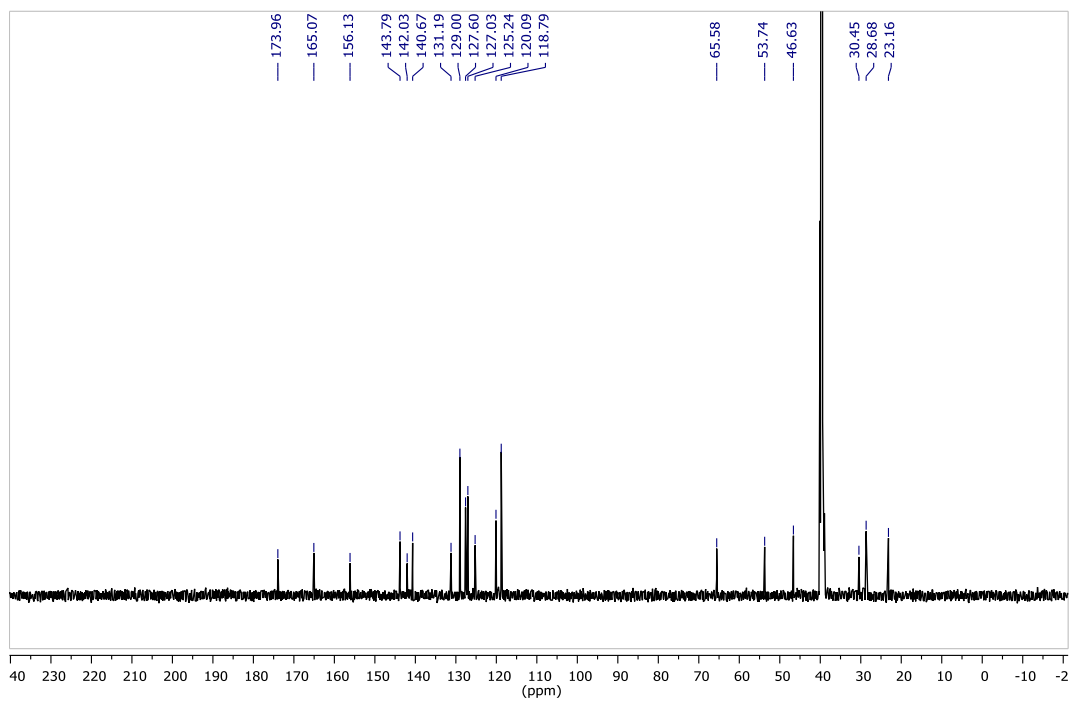



**FA-N<sub>3</sub>-3** - N<sup>2</sup>-((S)-4-(4-(((2-amino-4-hydroxypteridin-6-yl)methyl)amino)benzamido)-4-carboxybutanoyl)-D-aspartyl-L-aspartyl-L-aspartyl-N<sup>6</sup>-(4-azidobenzoyl)-L-lysine

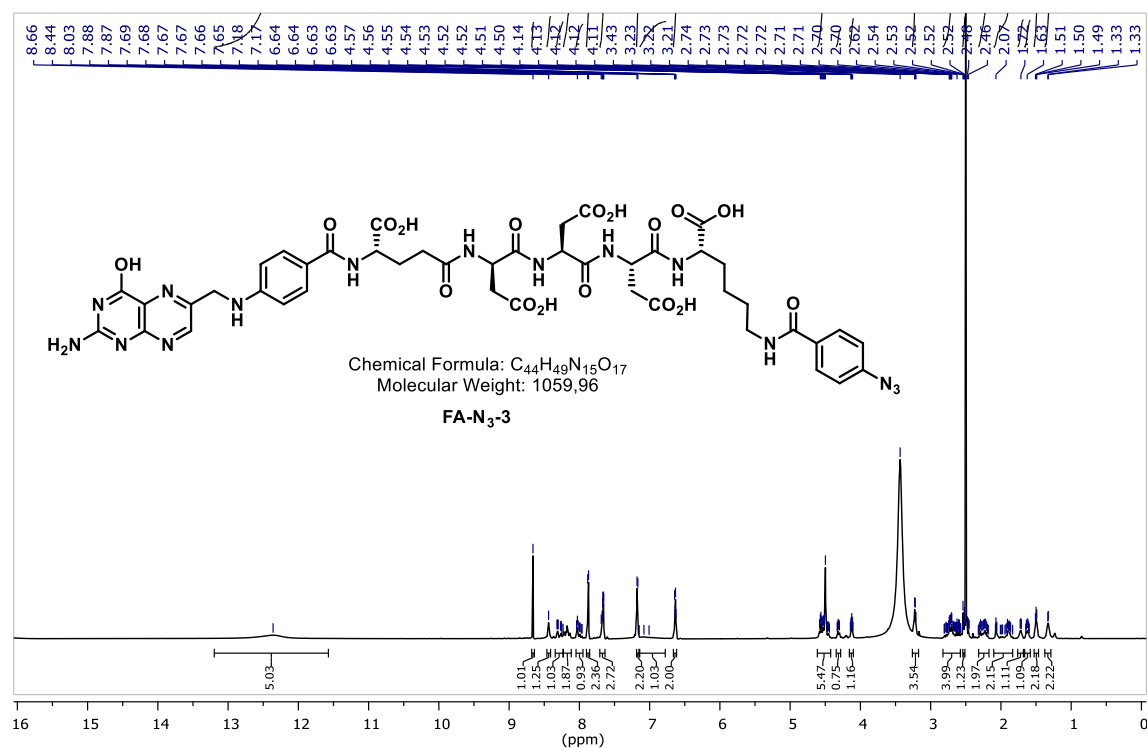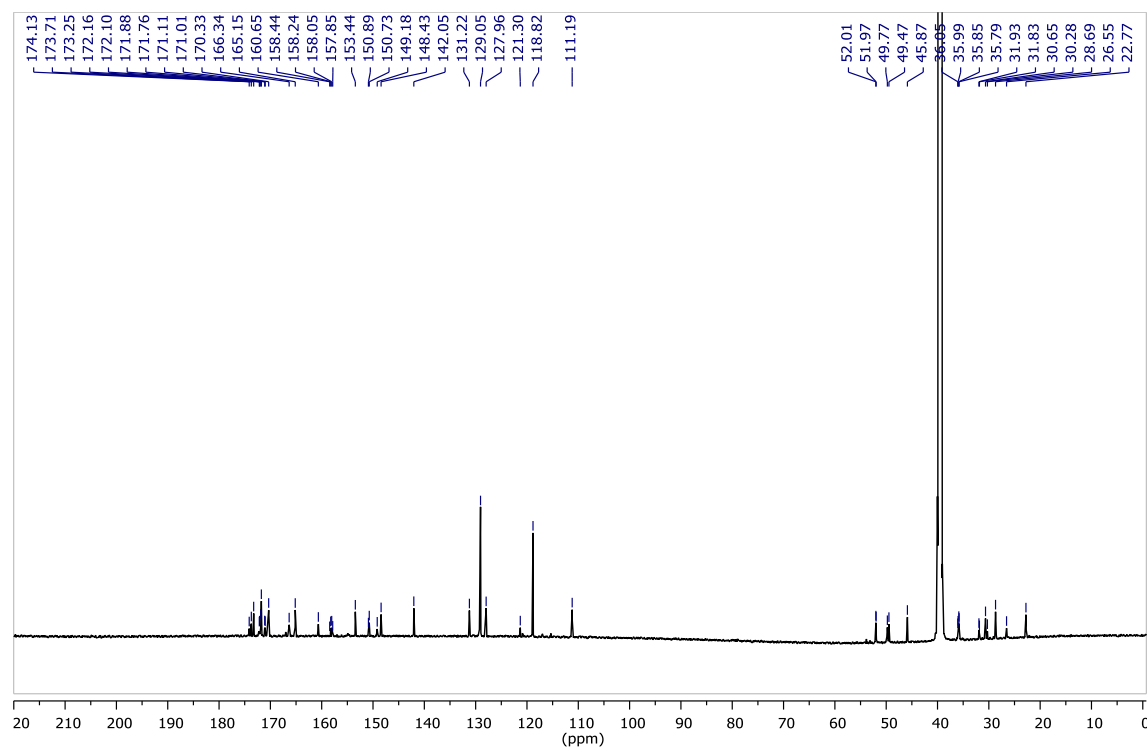

**FA-N<sub>3</sub>-4** - N<sup>2</sup>-N<sup>2</sup>-((S)-4-(4-(((2-amino-4-hydroxypteridin-6-yl)methyl)amino)benzamido)-4-carboxybutanoyl)-D-aspartyl-D-aspartyl-N<sup>6</sup>-(4-azidobenzoyl)-L-lysyl-L-aspartyl-L-aspartyl-N<sup>6</sup>-(4-azidobenzoyl)-L-lysine

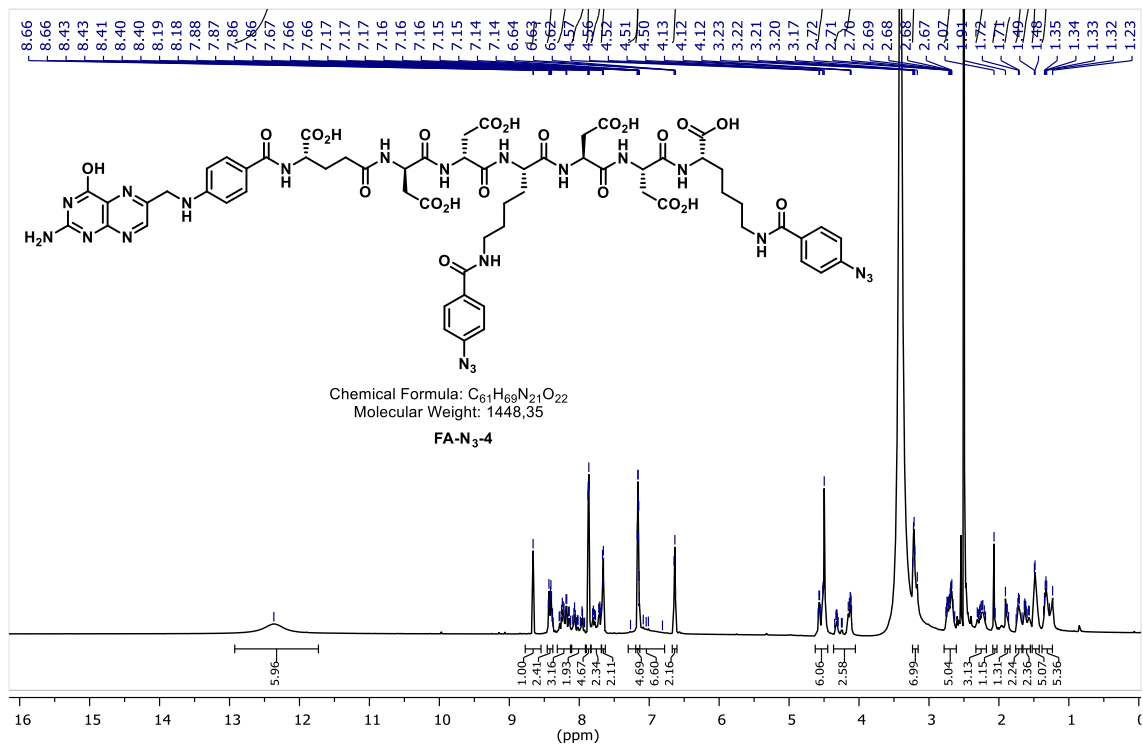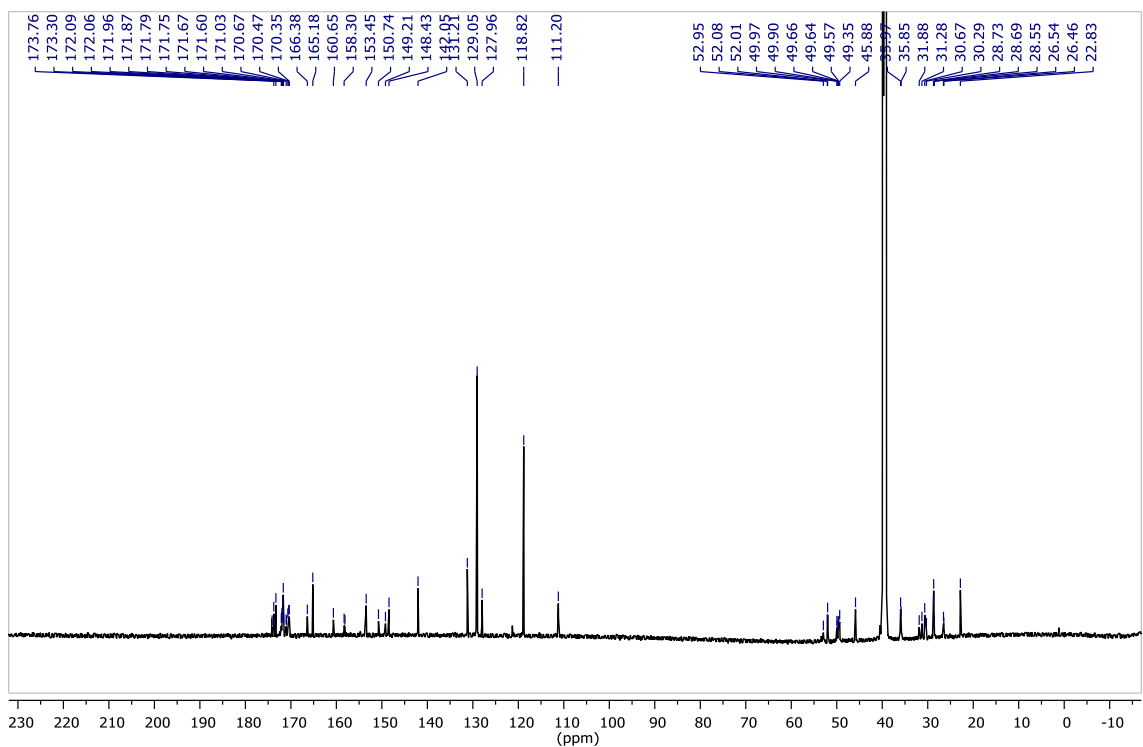

**FA-N<sub>3</sub>-5** - N<sup>2</sup>-(4-(((2-amino-4-hydroxypteridin-6-yl)methyl)amino)benzoyl)-N5-(((R)-1-(((R)-1-(((R)-1-(((R)-1-(((S)-4-azido-1-carboxybutyl)amino)-3-carboxy-1-oxopropan-2-yl)amino)-3-carboxy-1-oxopropan-2-yl)amino)-3-carboxy-1-oxopropan-2-yl)amino)-3-carboxy-1-oxopropan-2-yl)-L-glutamine <sup>1</sup>H (top), <sup>13</sup>C (bottom)

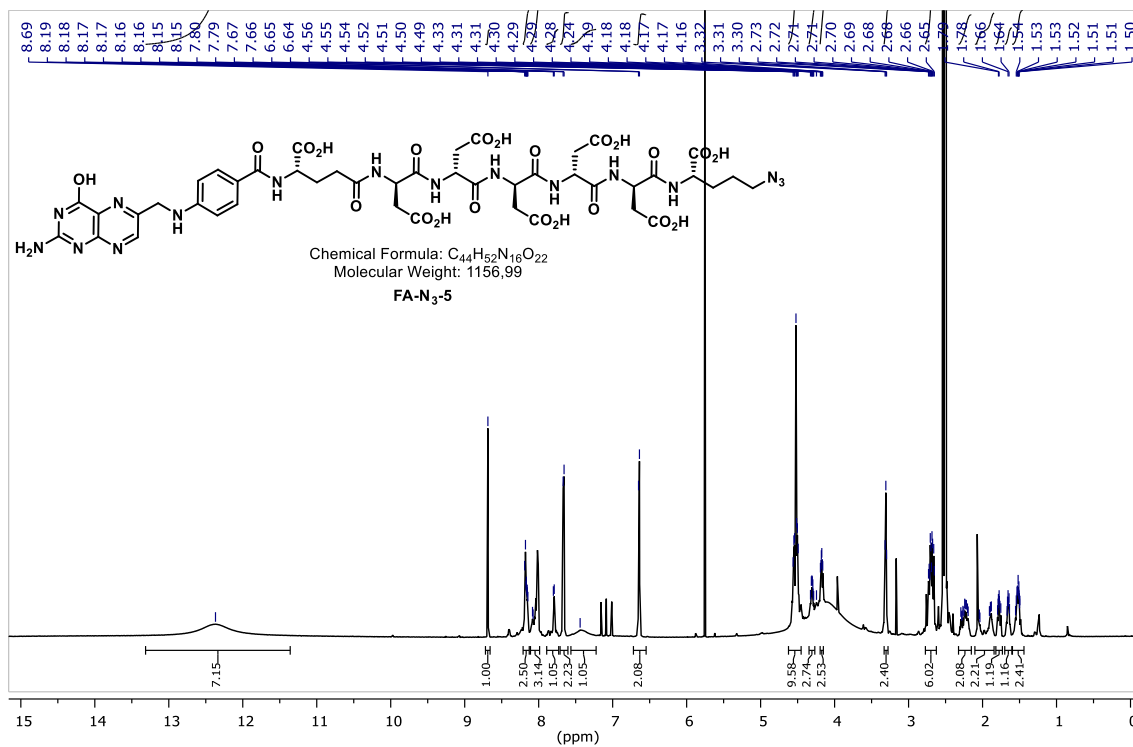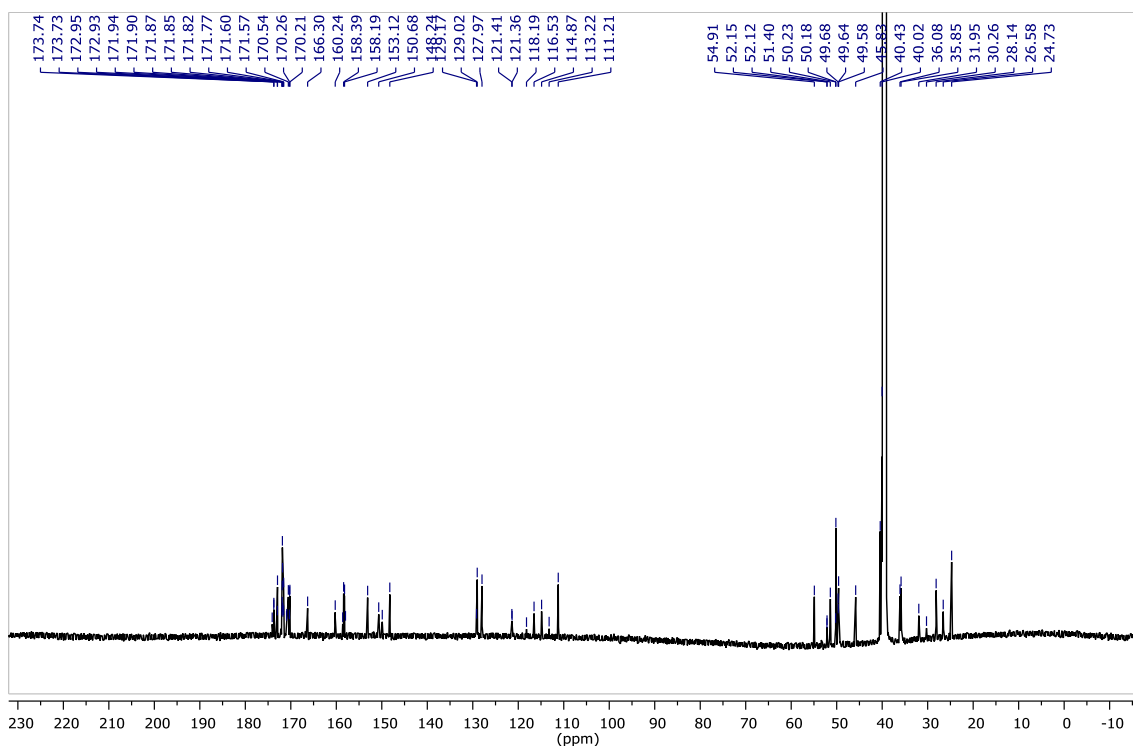

**FA-N<sub>3</sub>-6** - (3S,8S,13S)-1-(4-(((2-amino-4-hydroxypteridin-6-yl)methyl)amino)phenyl)-19-(4-azidophenyl)-1,6,11,19-tetraoxo-2,7,12,18-tetraazanonadecane-3,8,13-tricarboxylic acid

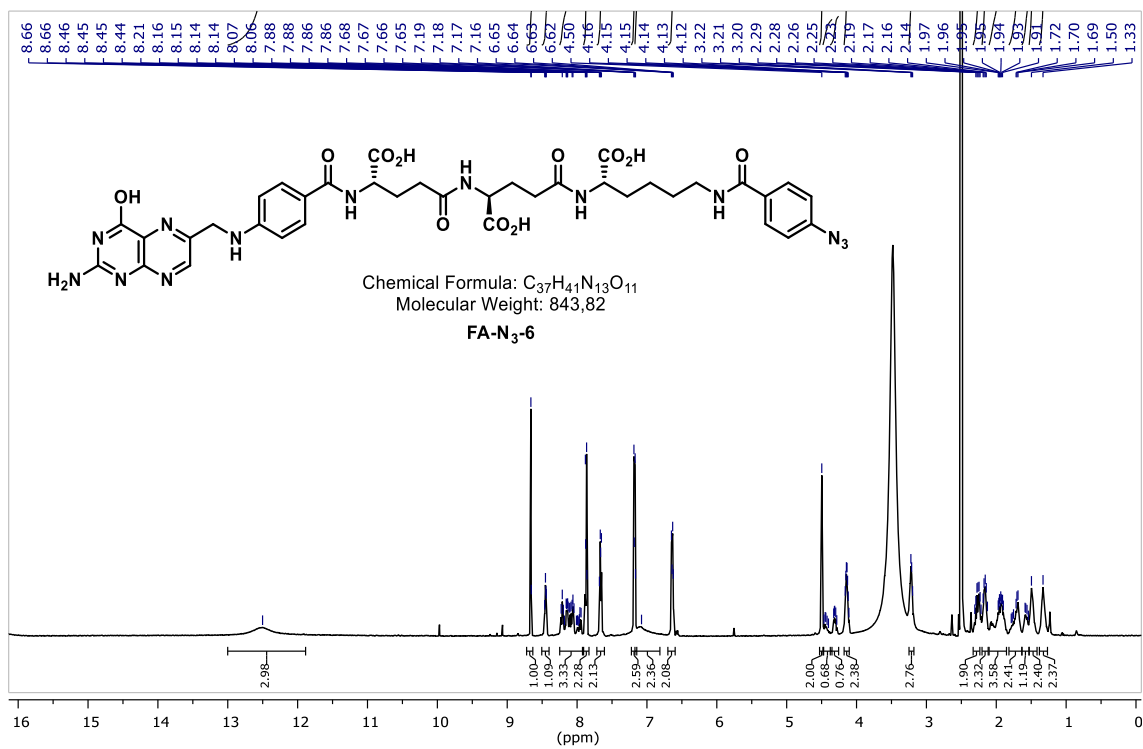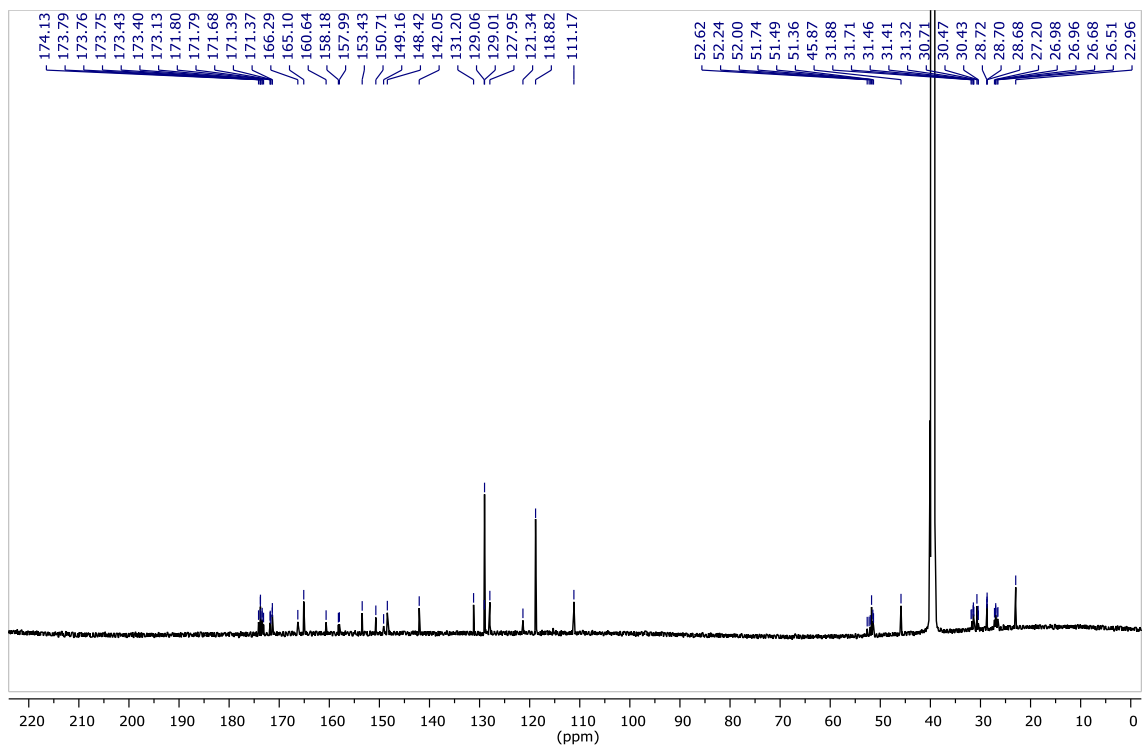

**FA-N<sub>3</sub>-7** - N<sup>2</sup>-(4-(((2-amino-4-hydroxypteridin-6-yl)methyl)amino)benzoyl)-N<sup>5</sup>-((S)-4-(((S)-4-azido-1-carboxybutyl)amino)-1-carboxy-4-oxobutyl)-L-glutamine

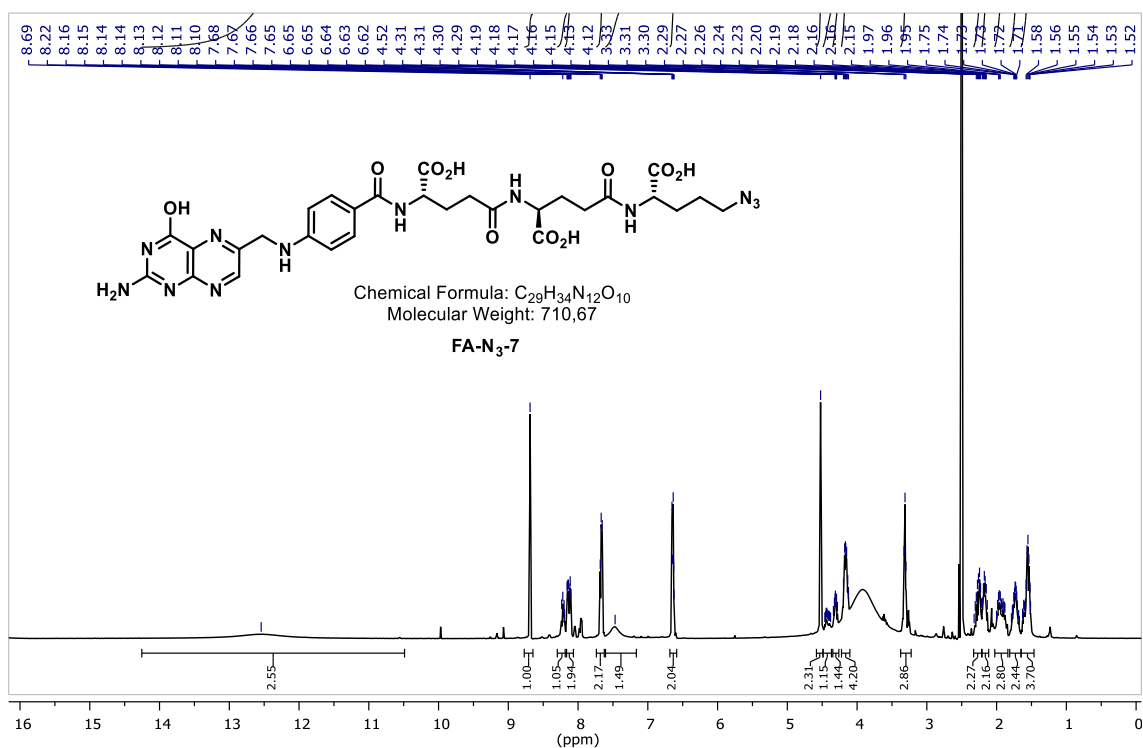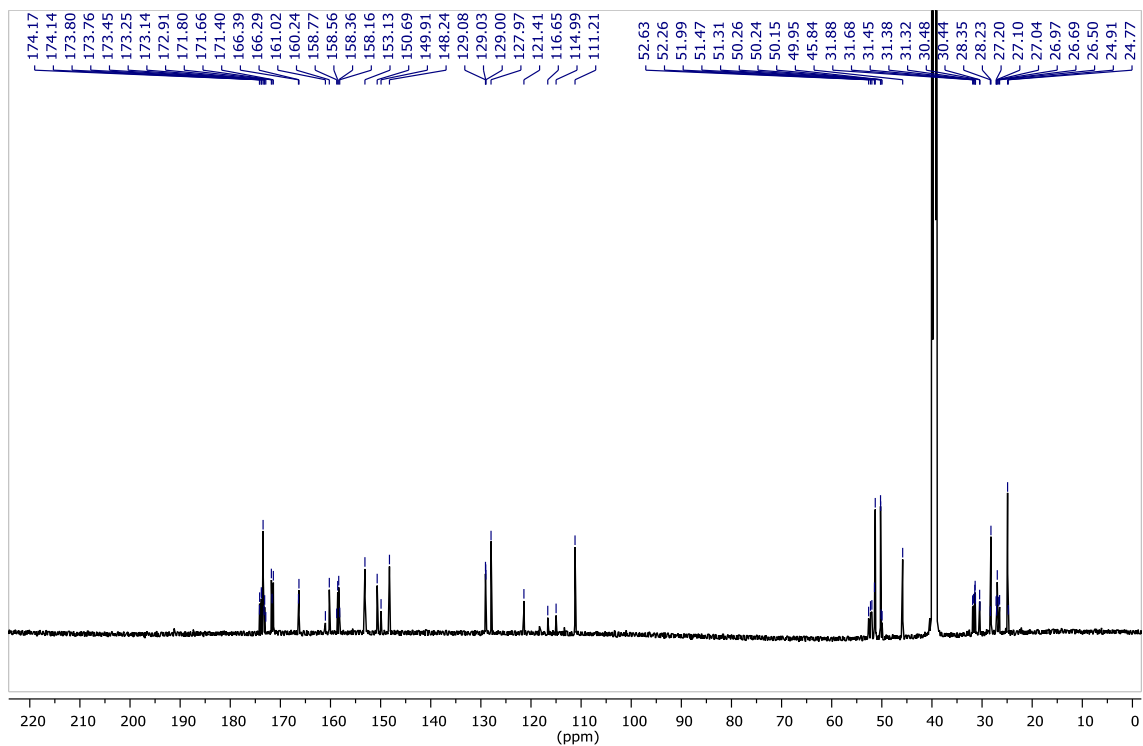

**FA-N<sub>3</sub>-8** - N<sup>2</sup>-((S)-4-(4-(((2-amino-4-hydroxypteridin-6-yl)methyl)amino)benzamido)-4-carboxybutanoyl)-N<sup>6</sup>-(4-azidobenzoyl)-L-lysyl-D-lysine

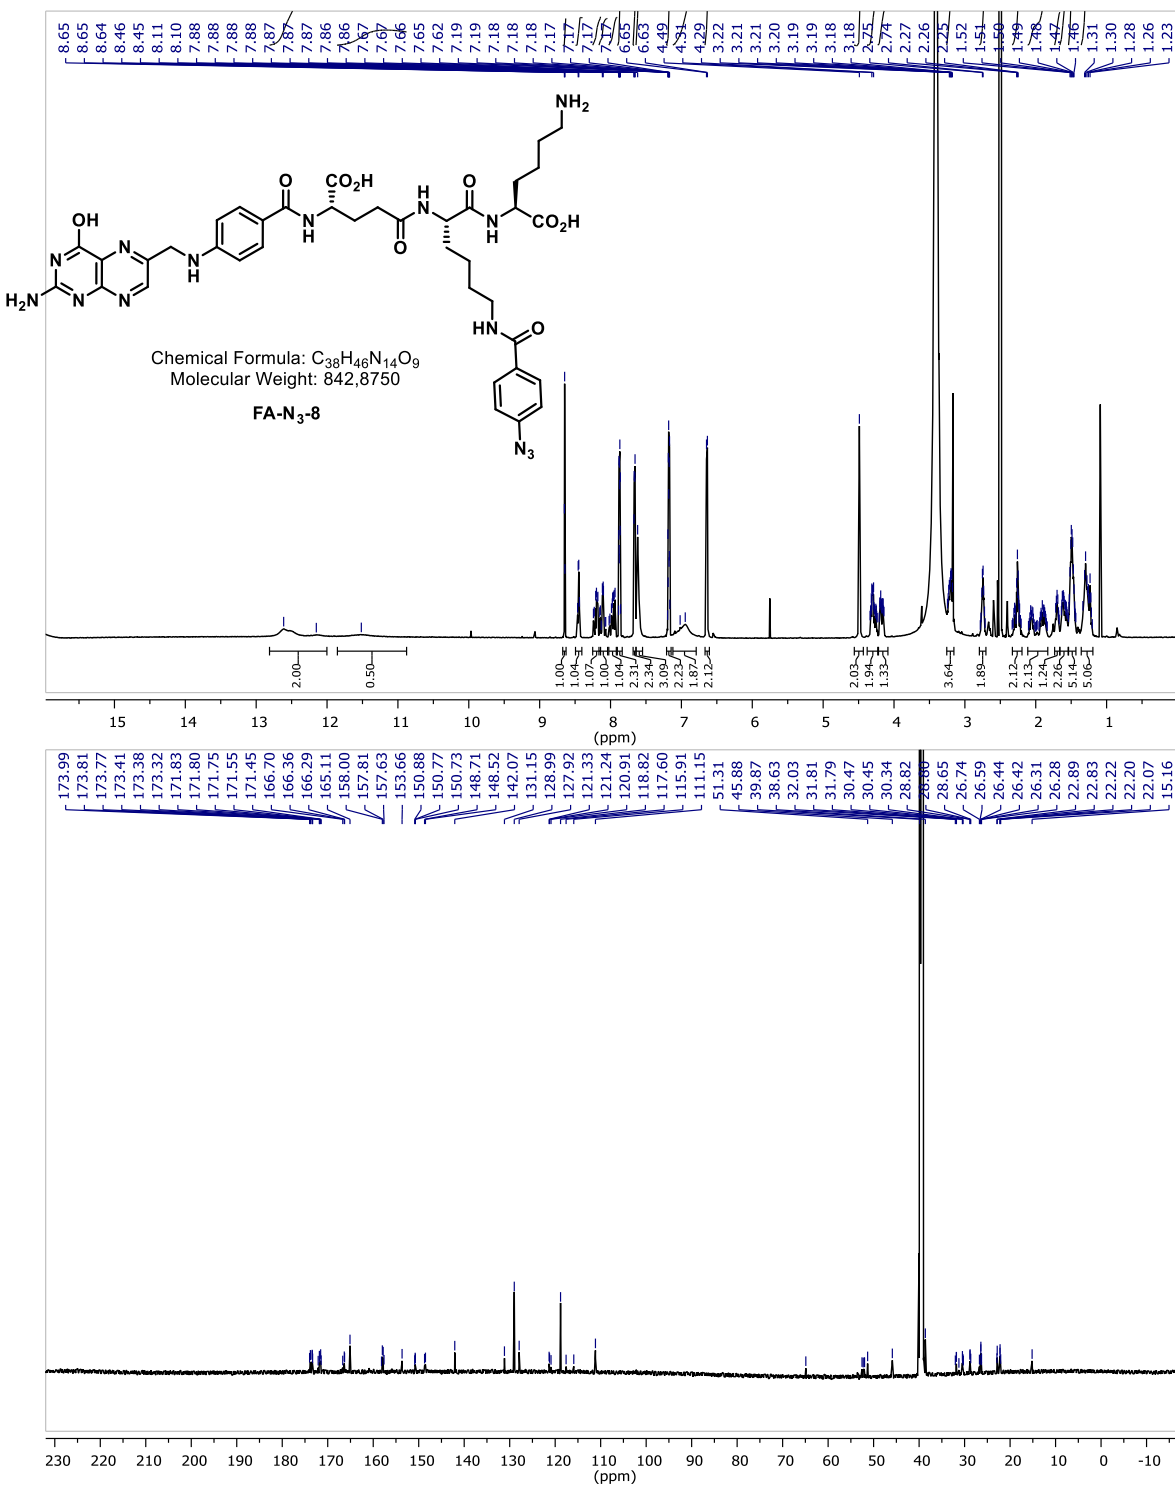

**FA-N<sub>3</sub>-9** - ((S)-2-((S)-4-(4-(((2-amino-4-hydroxypteridin-6-yl)methyl)amino)benzamido)-4-carboxybutanamido)-5-azidopentanoyl)-D-lysine

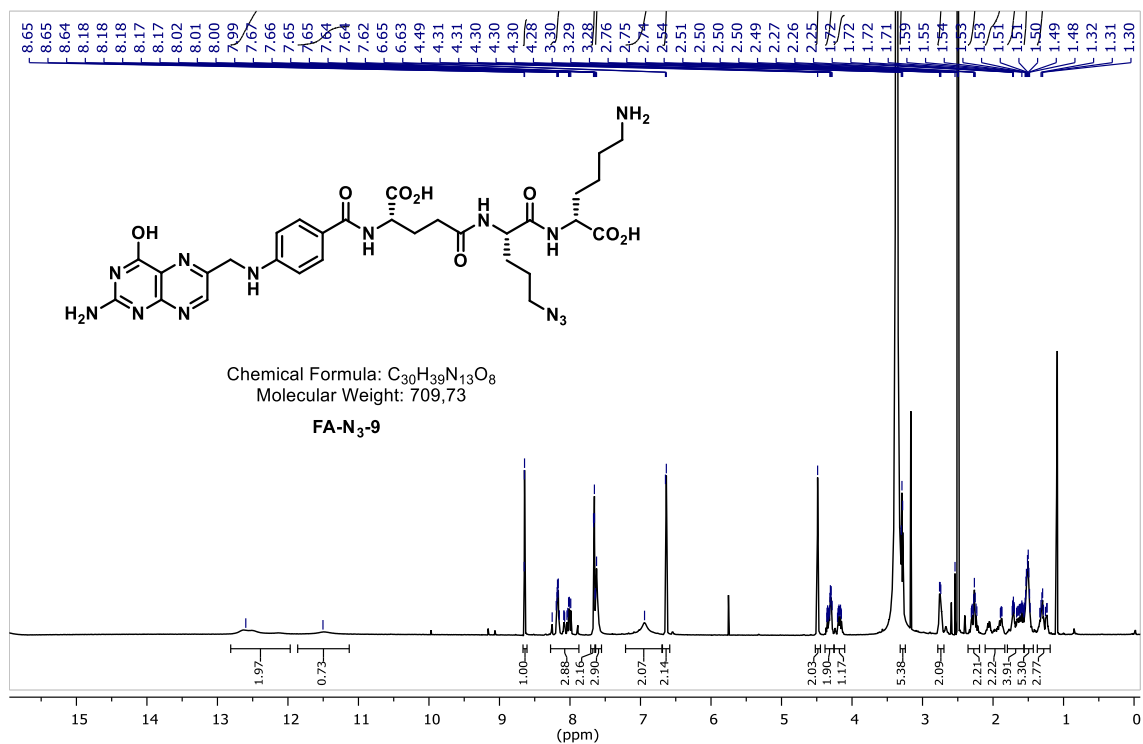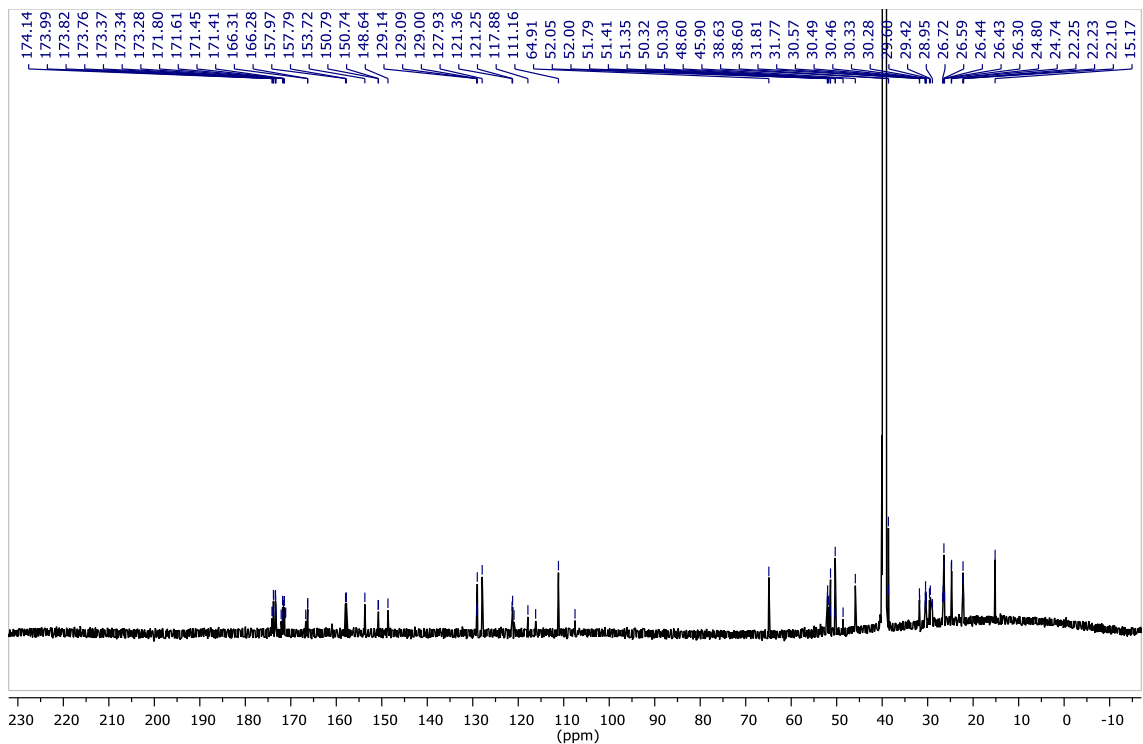

**FA-N<sub>3</sub>-10** - ((S)-2-((R)-2-((R)-2-((R)-2-((S)-4-(4-(((2-amino-4-hydroxypteridin-6-yl)methyl)amino)benz-amido)-4-carboxybutanamido)-3-carboxypropanamido)-3-carboxypropanamido)-3-carboxypropanamido)-5-azidopentanoyl)-D-aspartyl-D-aspartyl-D-lysine

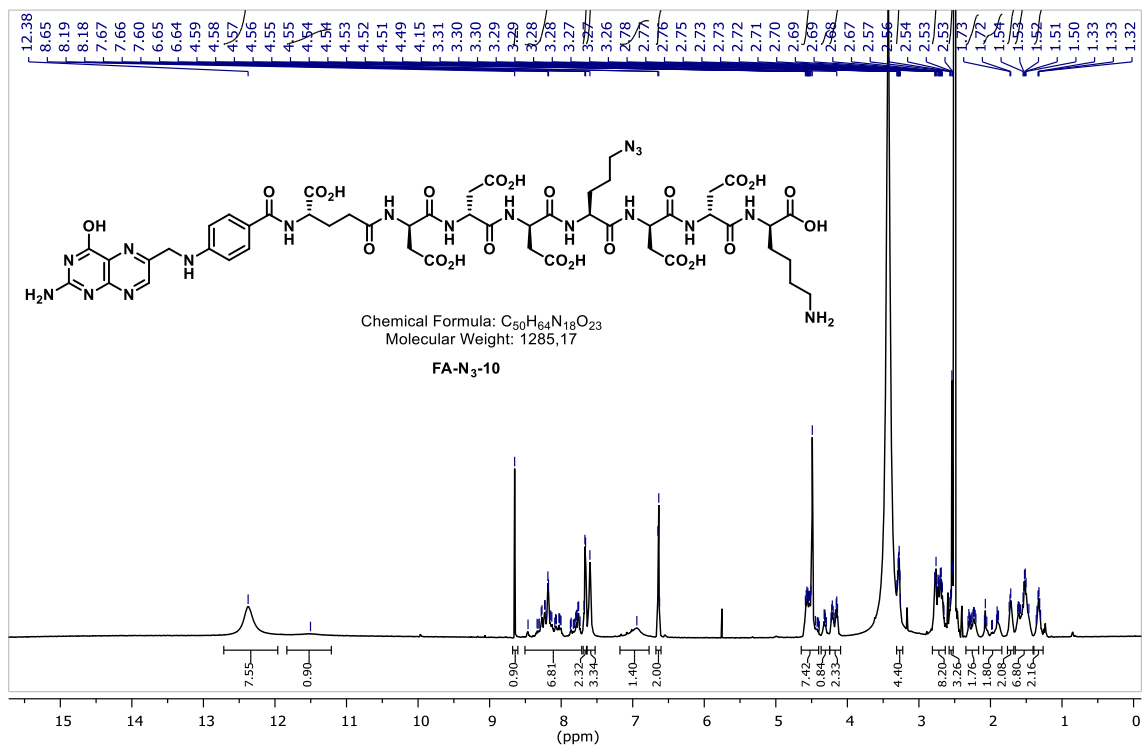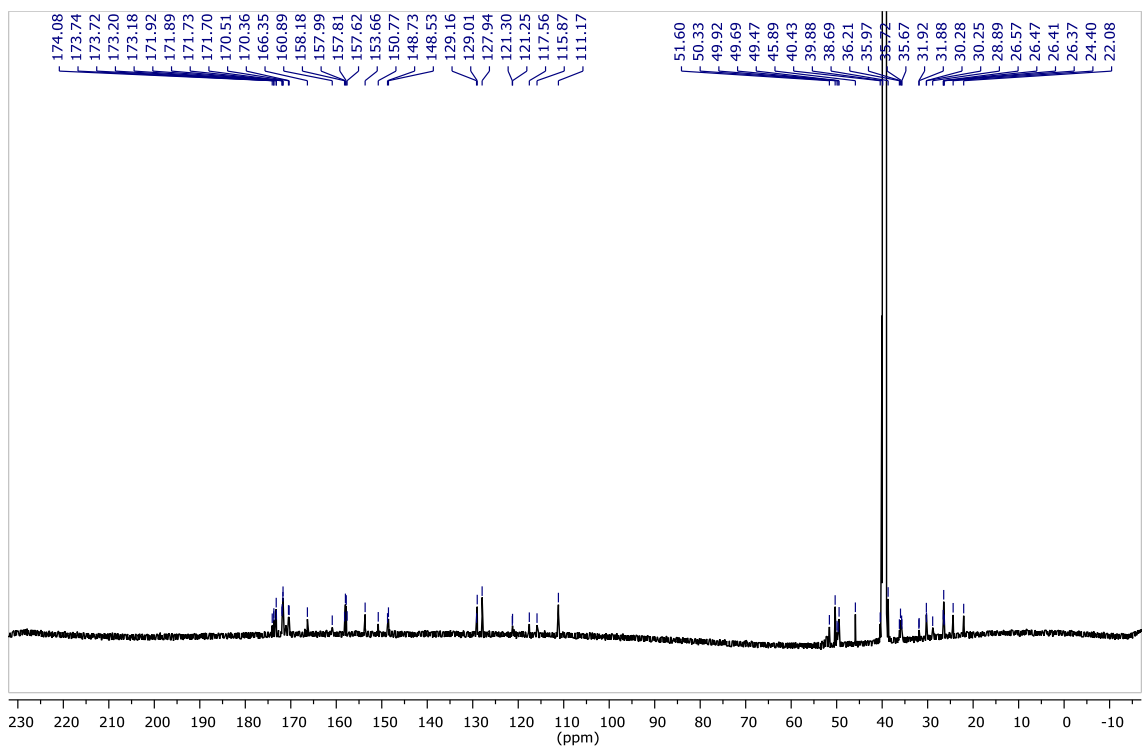



**FA-N<sub>3</sub>-11** - N<sup>2</sup>-(4-(((2-amino-4-hydroxypteridin-6-yl)methyl)amino)benzoyl)-N<sup>5</sup>-((R)-1-(((R)-1-(((S)-5-azido-1-(((R)-1-(((R)-1-(((S)-5-azido-1-(((R)-1-(((R)-1-(((S)-4-azido-1-carboxybutyl)amino)-3-carboxy-1-oxopropan-2-yl)amino)-3-carboxy-1-oxopropan-2-yl)amino)-1-oxopentan-2-yl)amino)-3-carboxy-1-oxopropan-2-yl)amino)-3-carboxy-1-oxopropan-2-yl)amino)-1-oxopentan-2-yl)amino)-3-carboxy-1-oxopropan-2-yl)-L-glutamine

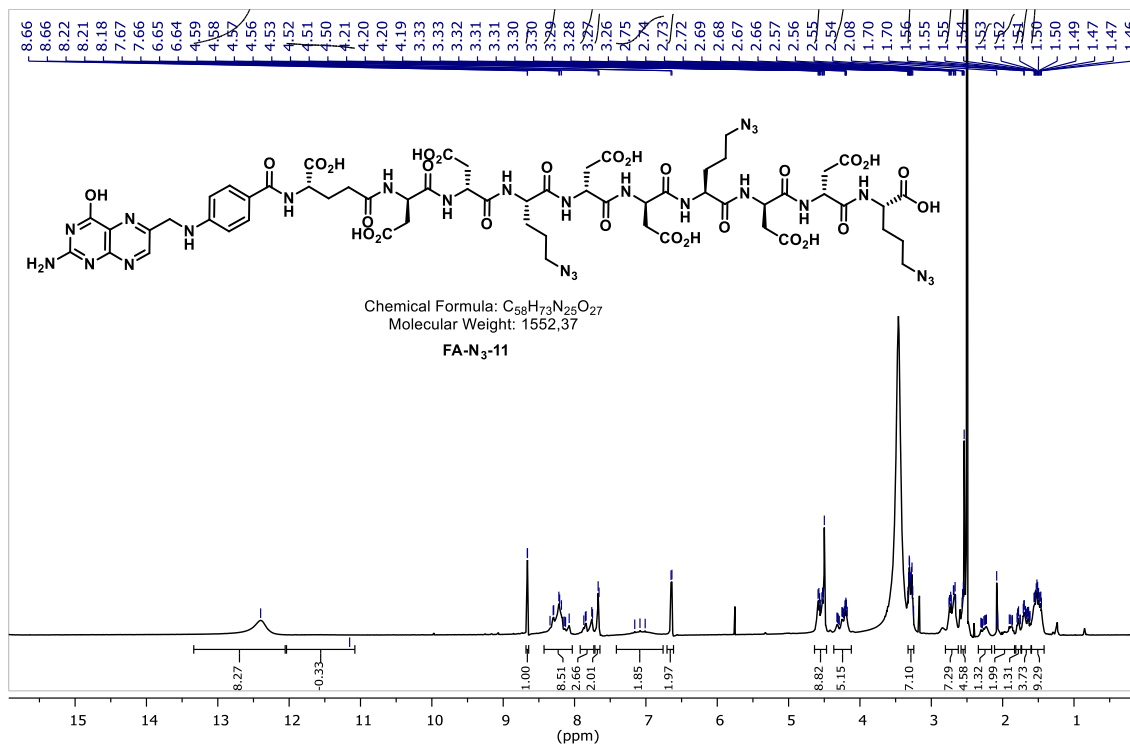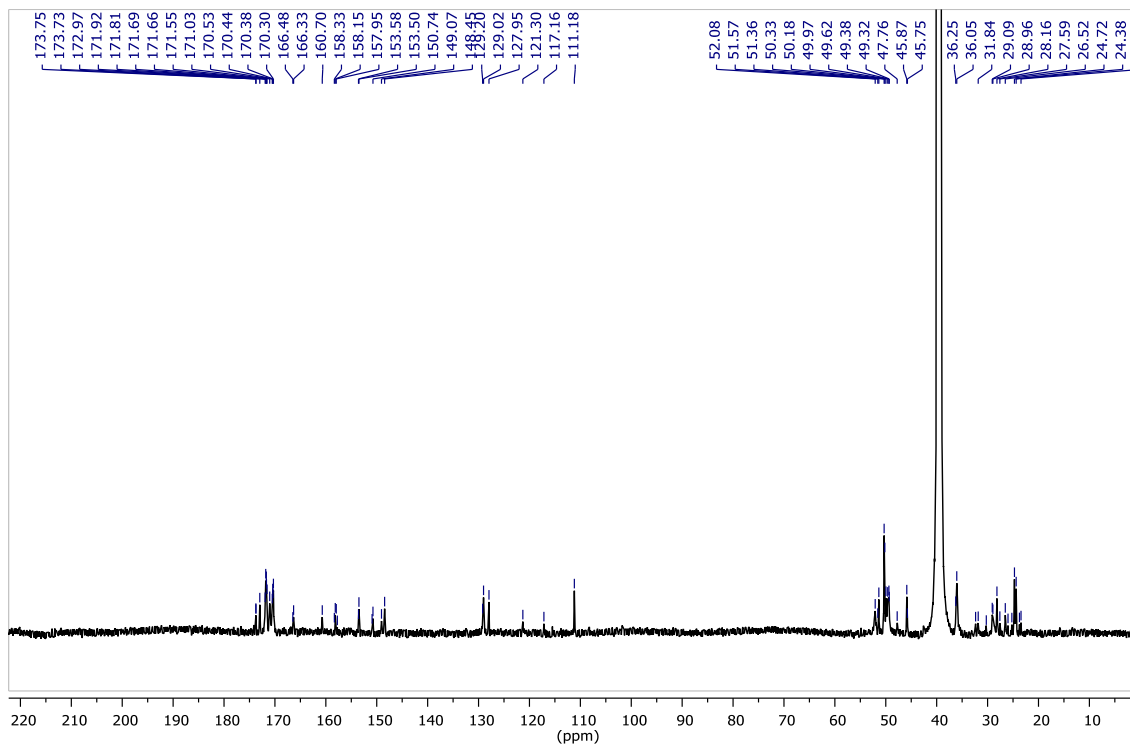

**FA-SH-1** -  $N^2$ -(4-(((2-amino-4-hydroxypteridin-6-yl)methyl)amino)benzoyl)- $N^5$ -((R)-1-carboxy-2-mercaptoethyl)-L-glutamine

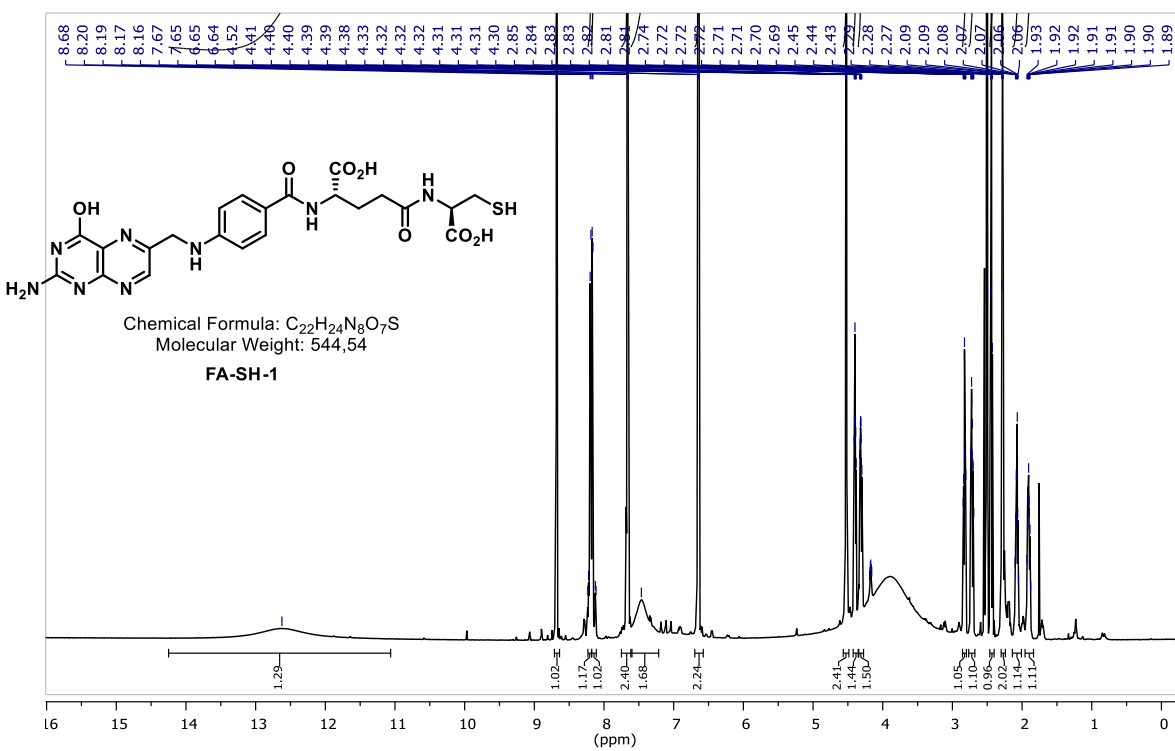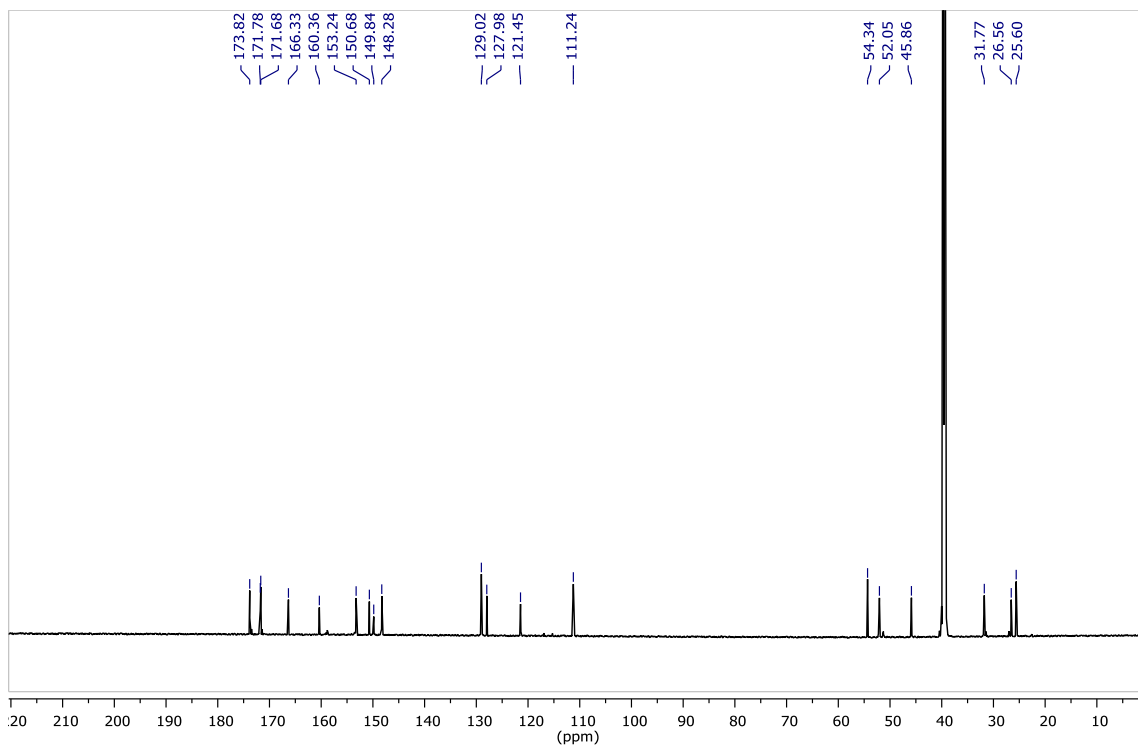

## LHRH

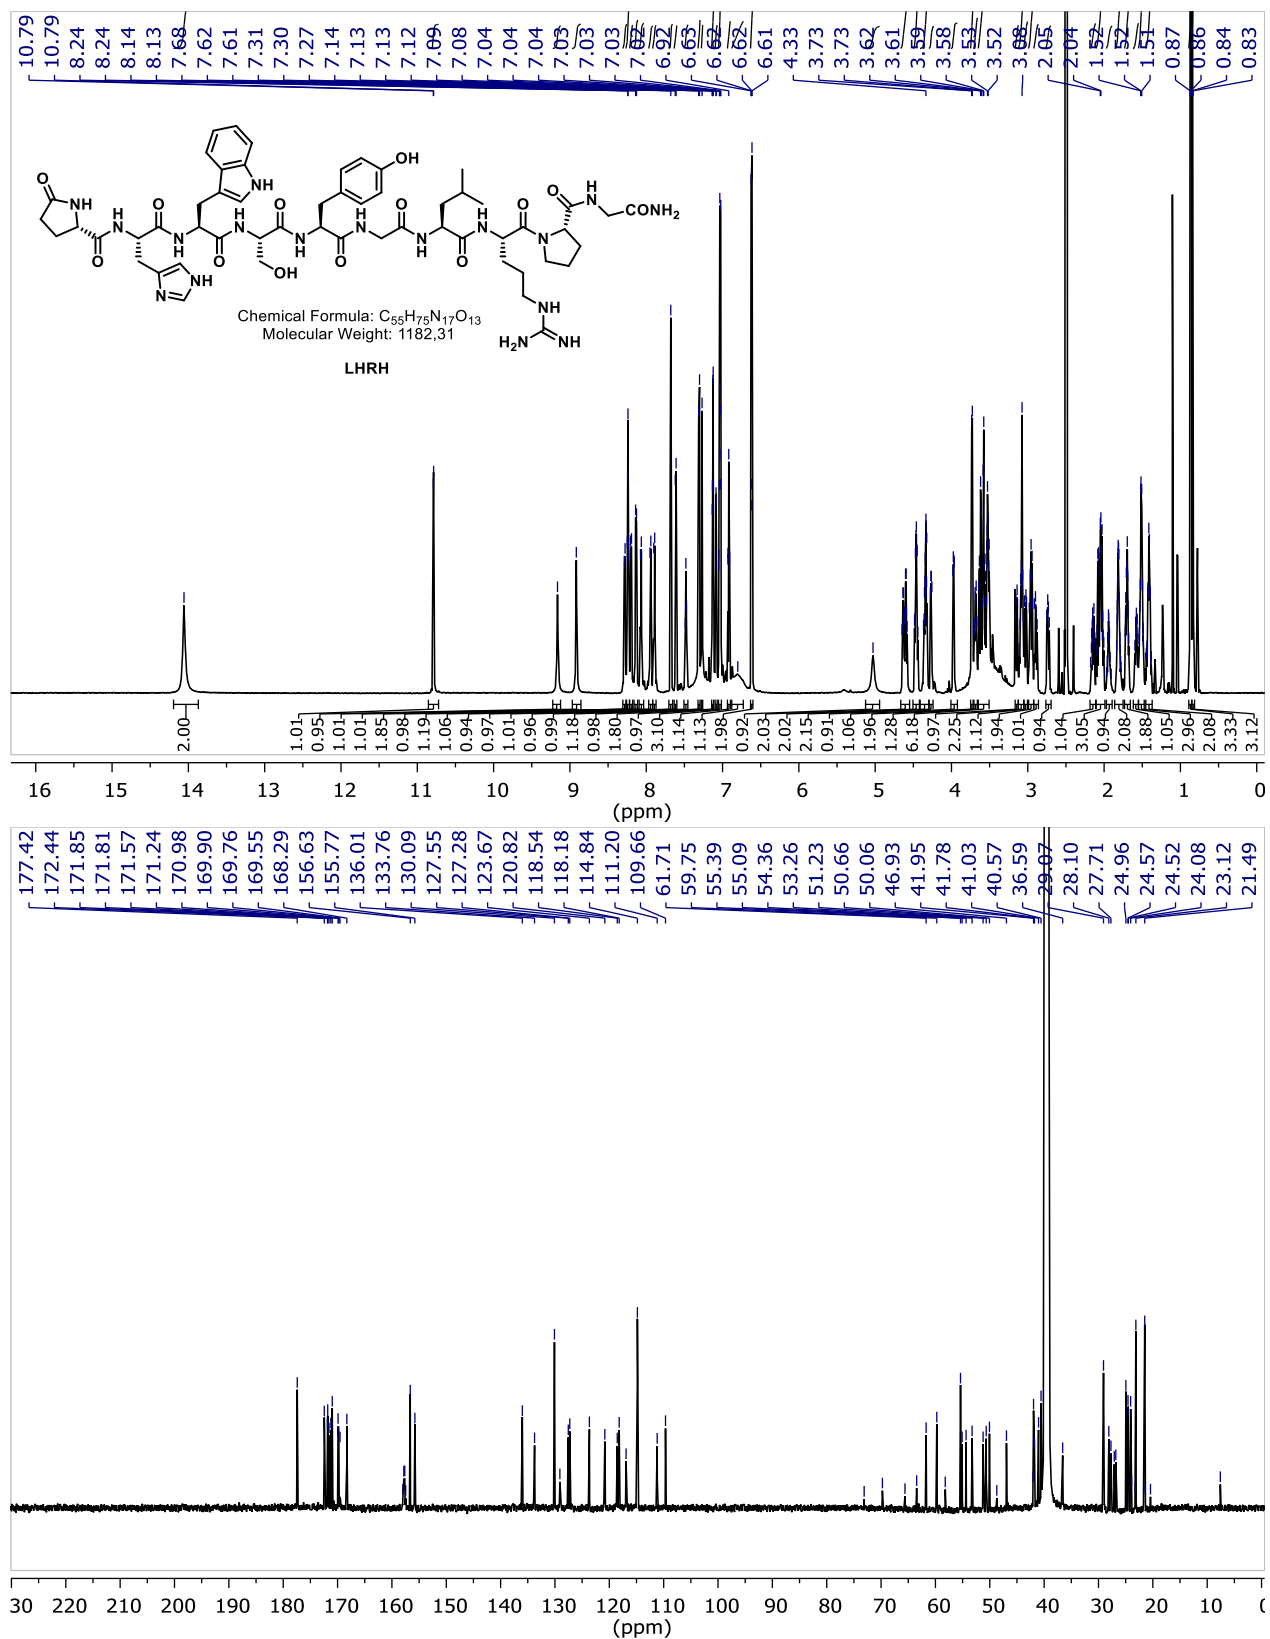

L-N<sub>3</sub>-Orn-LHRH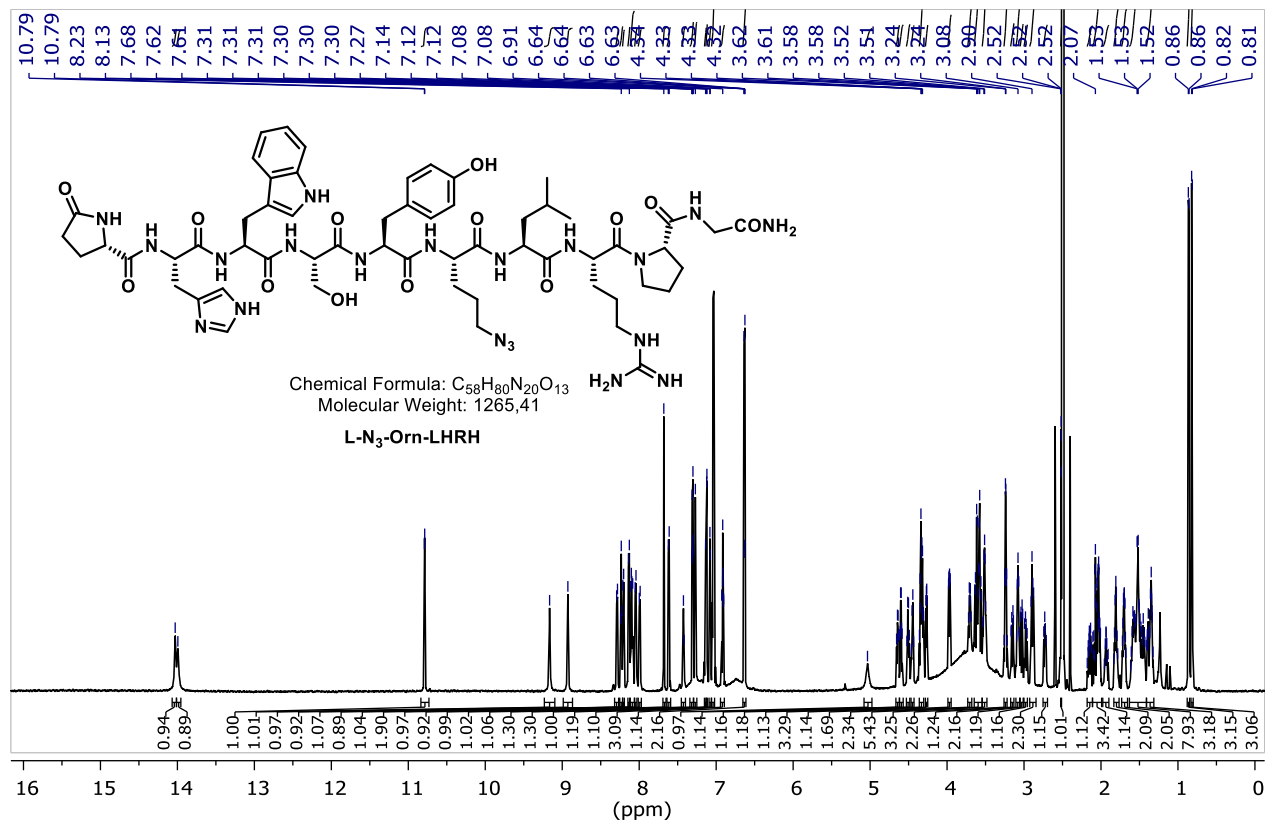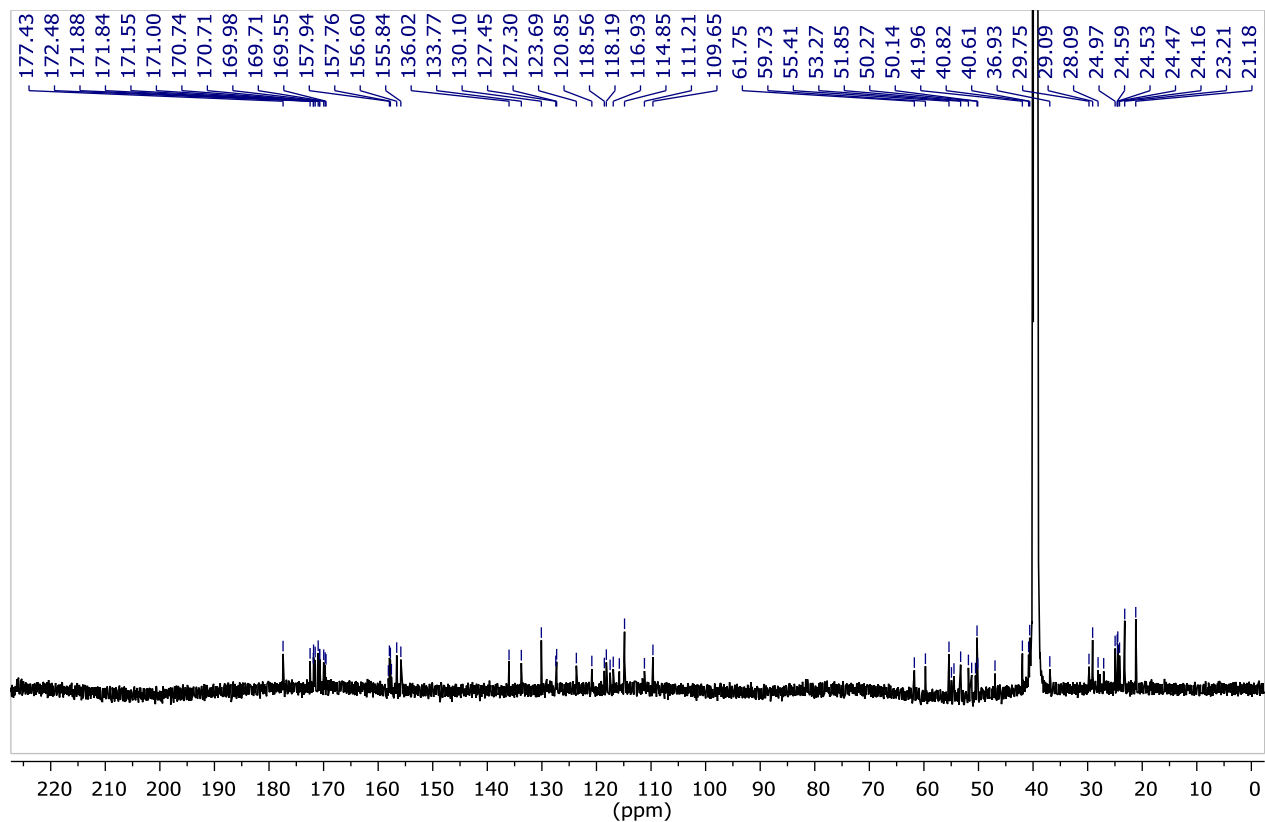

D-N<sub>3</sub>-Orn-LHRH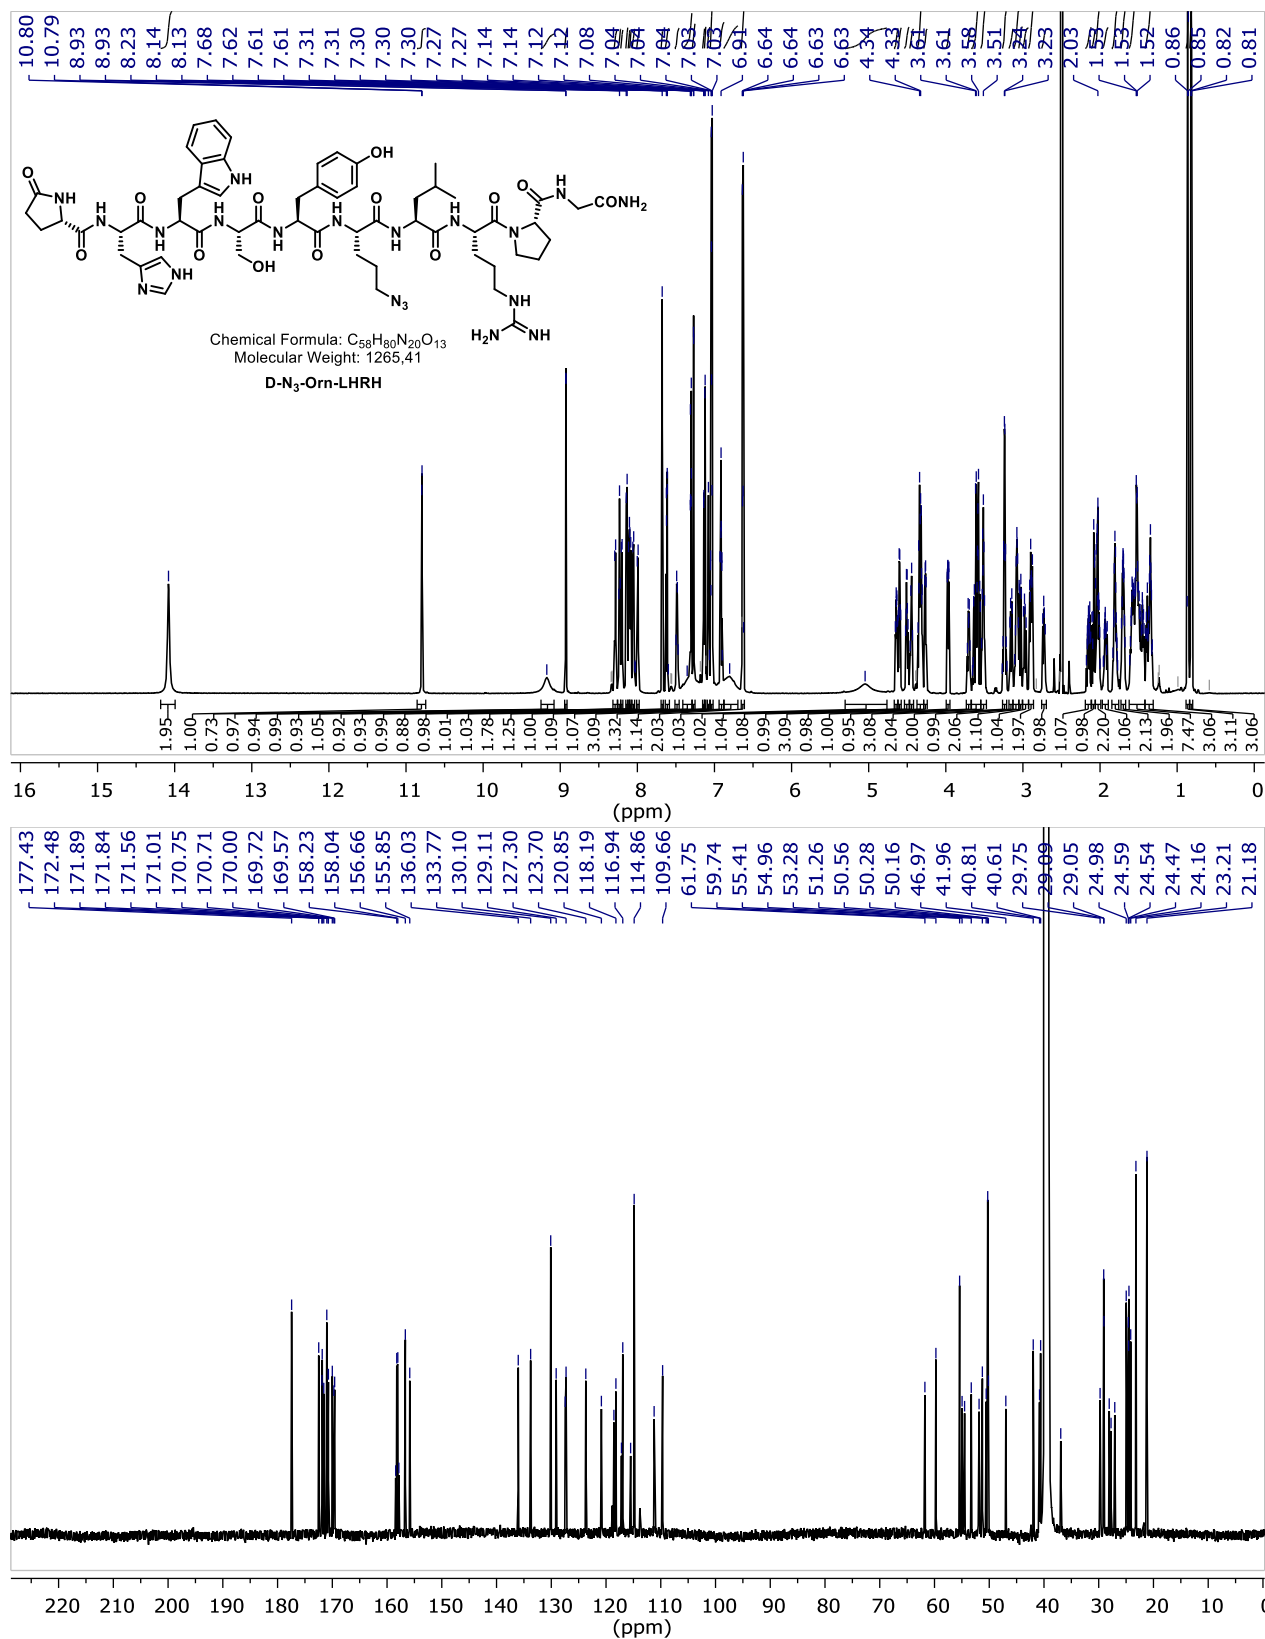

D-N<sub>3</sub>-Orn-Gose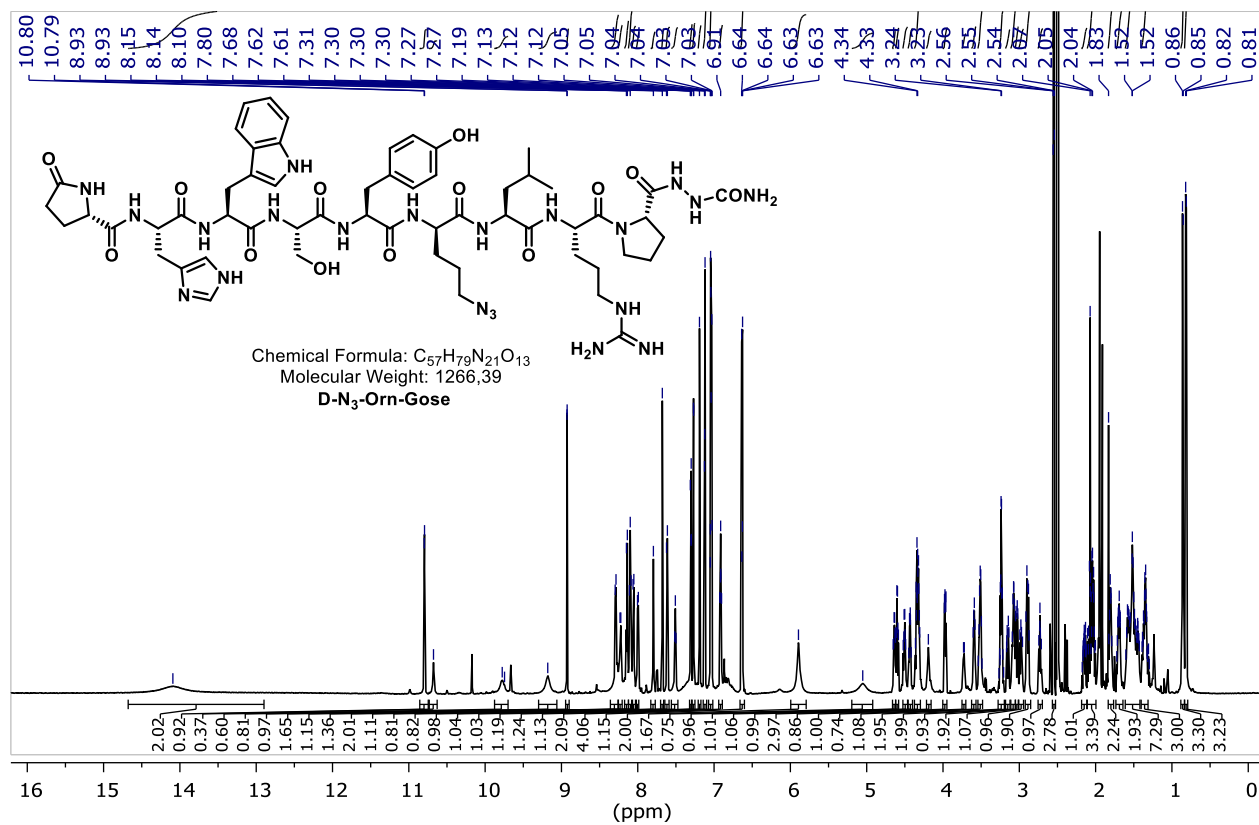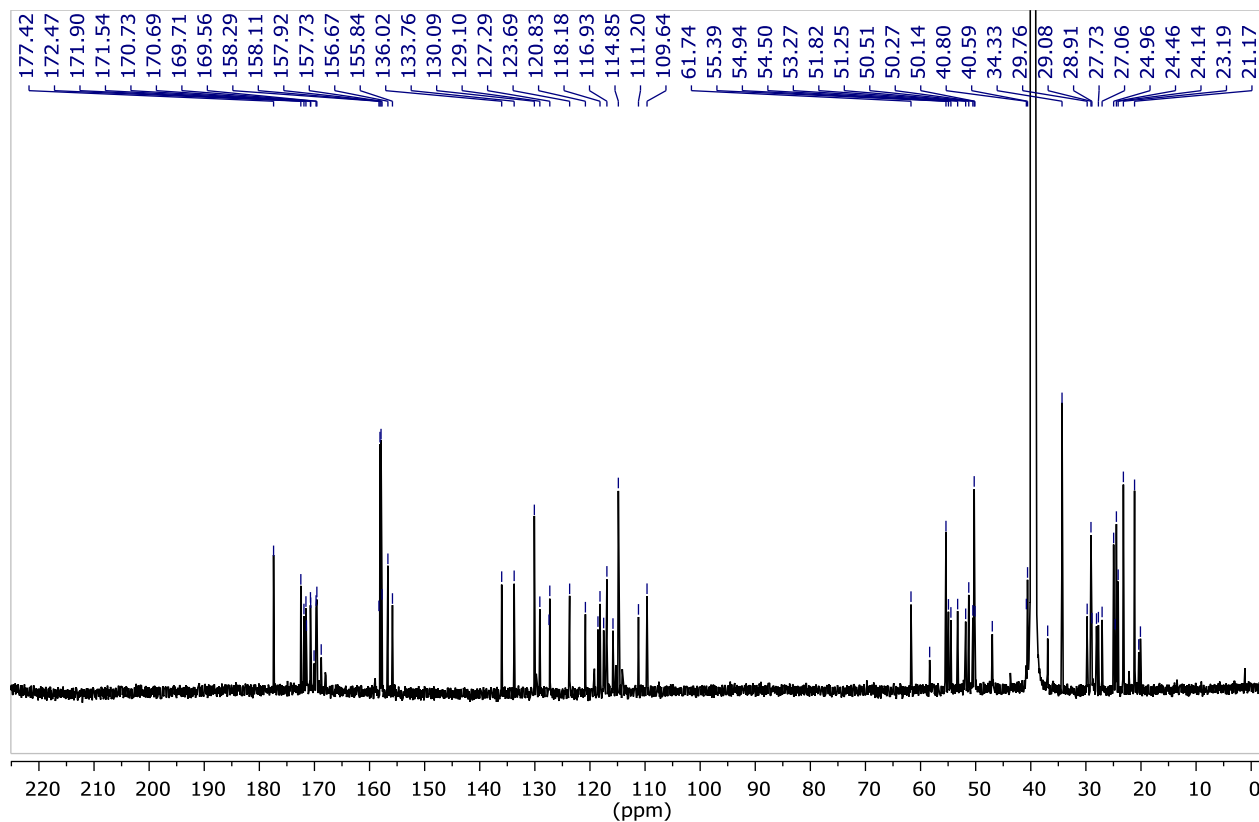

**BCN-FTIC (43)** - ((1R,8S,9s)-bicyclo[6.1.0]non-4-yn-9-yl)methyl (2-(3-(3',6'-dihydroxy-3-oxo-3H-spiro[isobenzofuran-1,9'-xanthen]-5/6-yl)thioureido)ethyl)carbamate

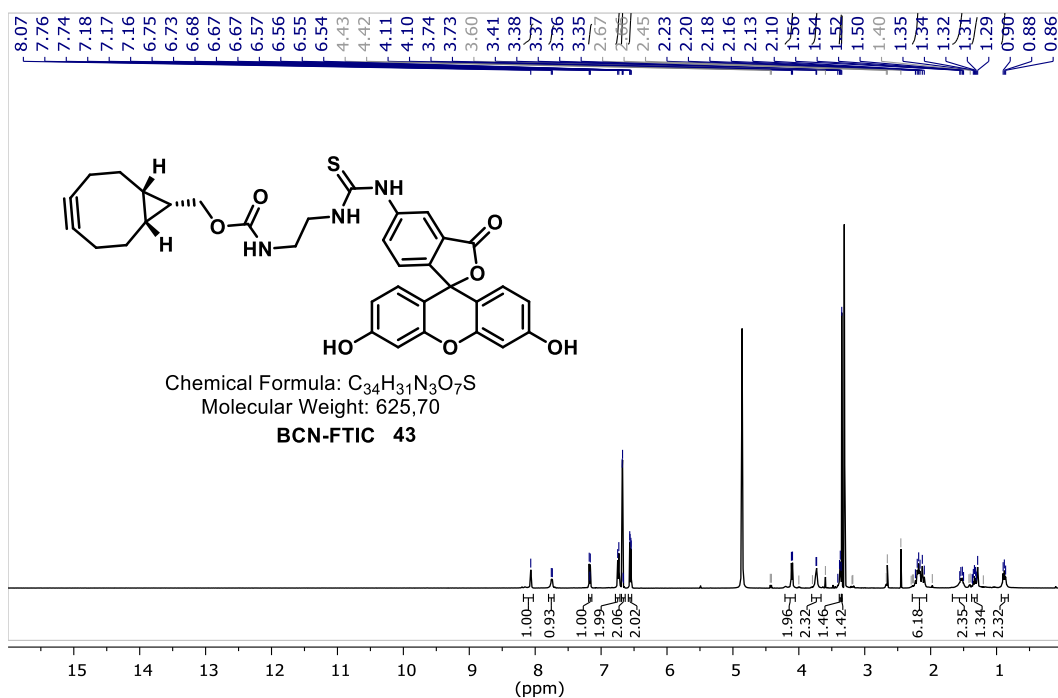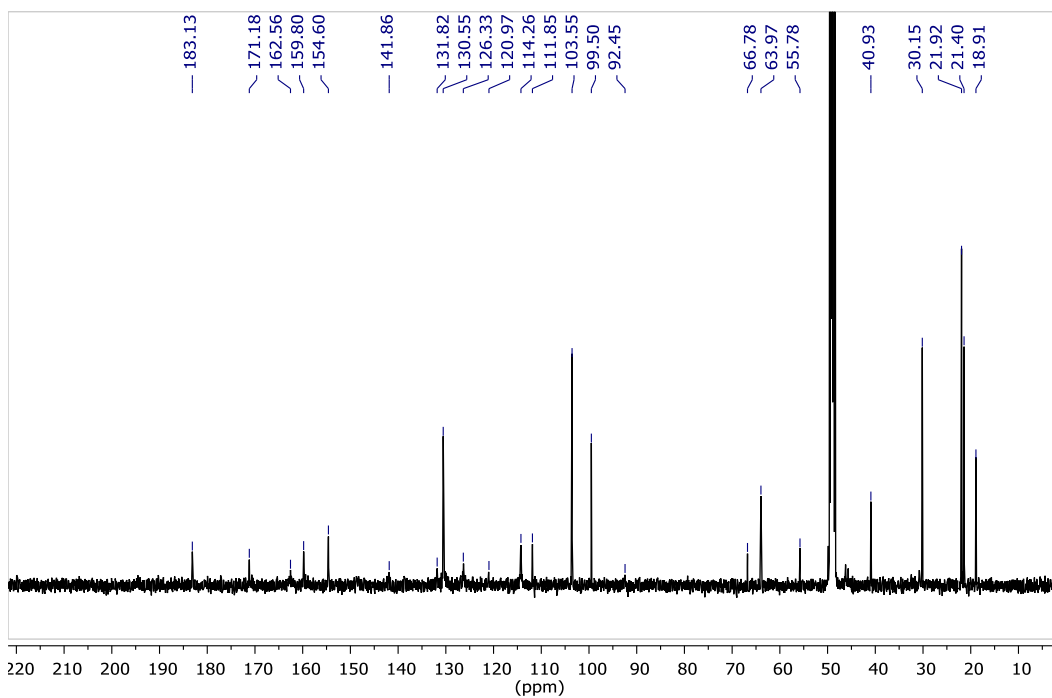

**Homopropargyl-FTIC (42)** - But-3-yn-1-yl (2-(3-(3',6'-dihydroxy-3-oxo-3H-spiro[isobenzofuran-1,9'-xanthen]-5/6-yl)thioureido)ethyl)carbamate

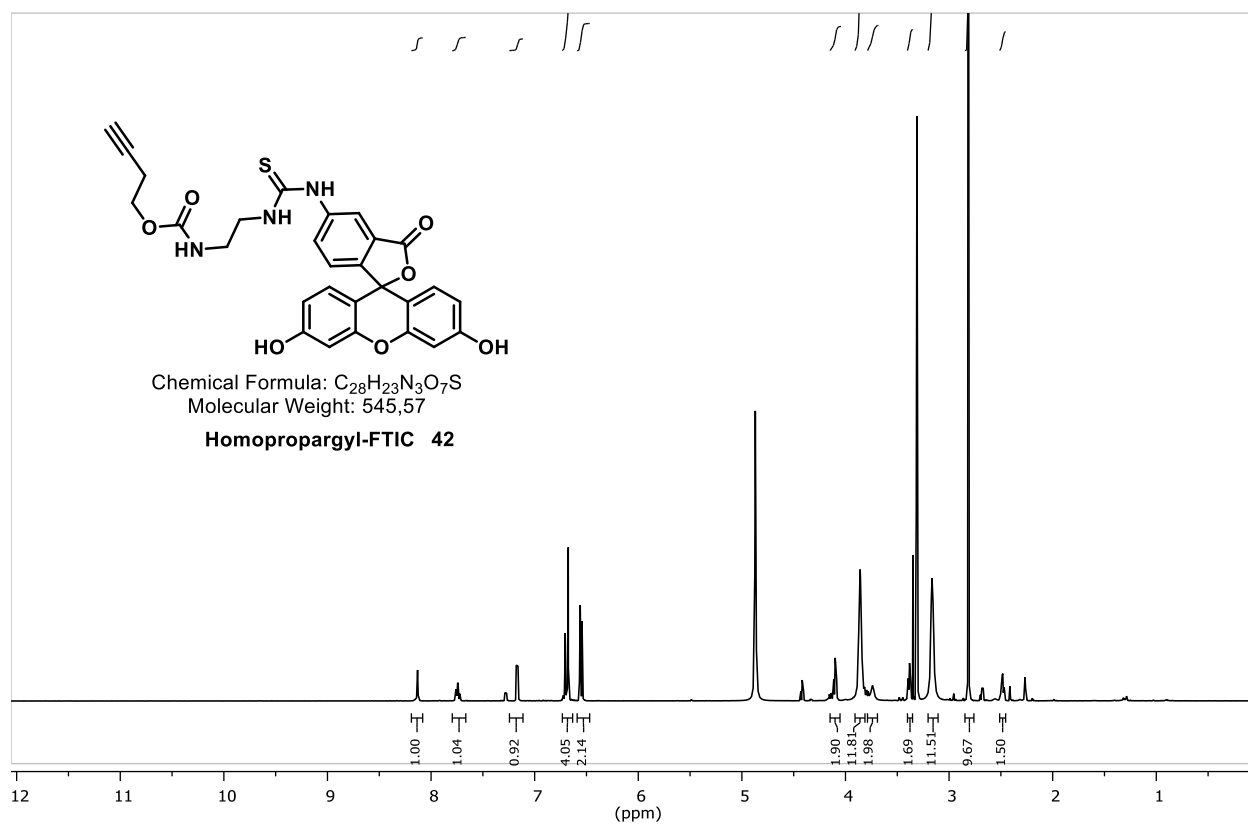



Biotin-PEG<sub>3</sub>-16S-Aminoratjadone (36)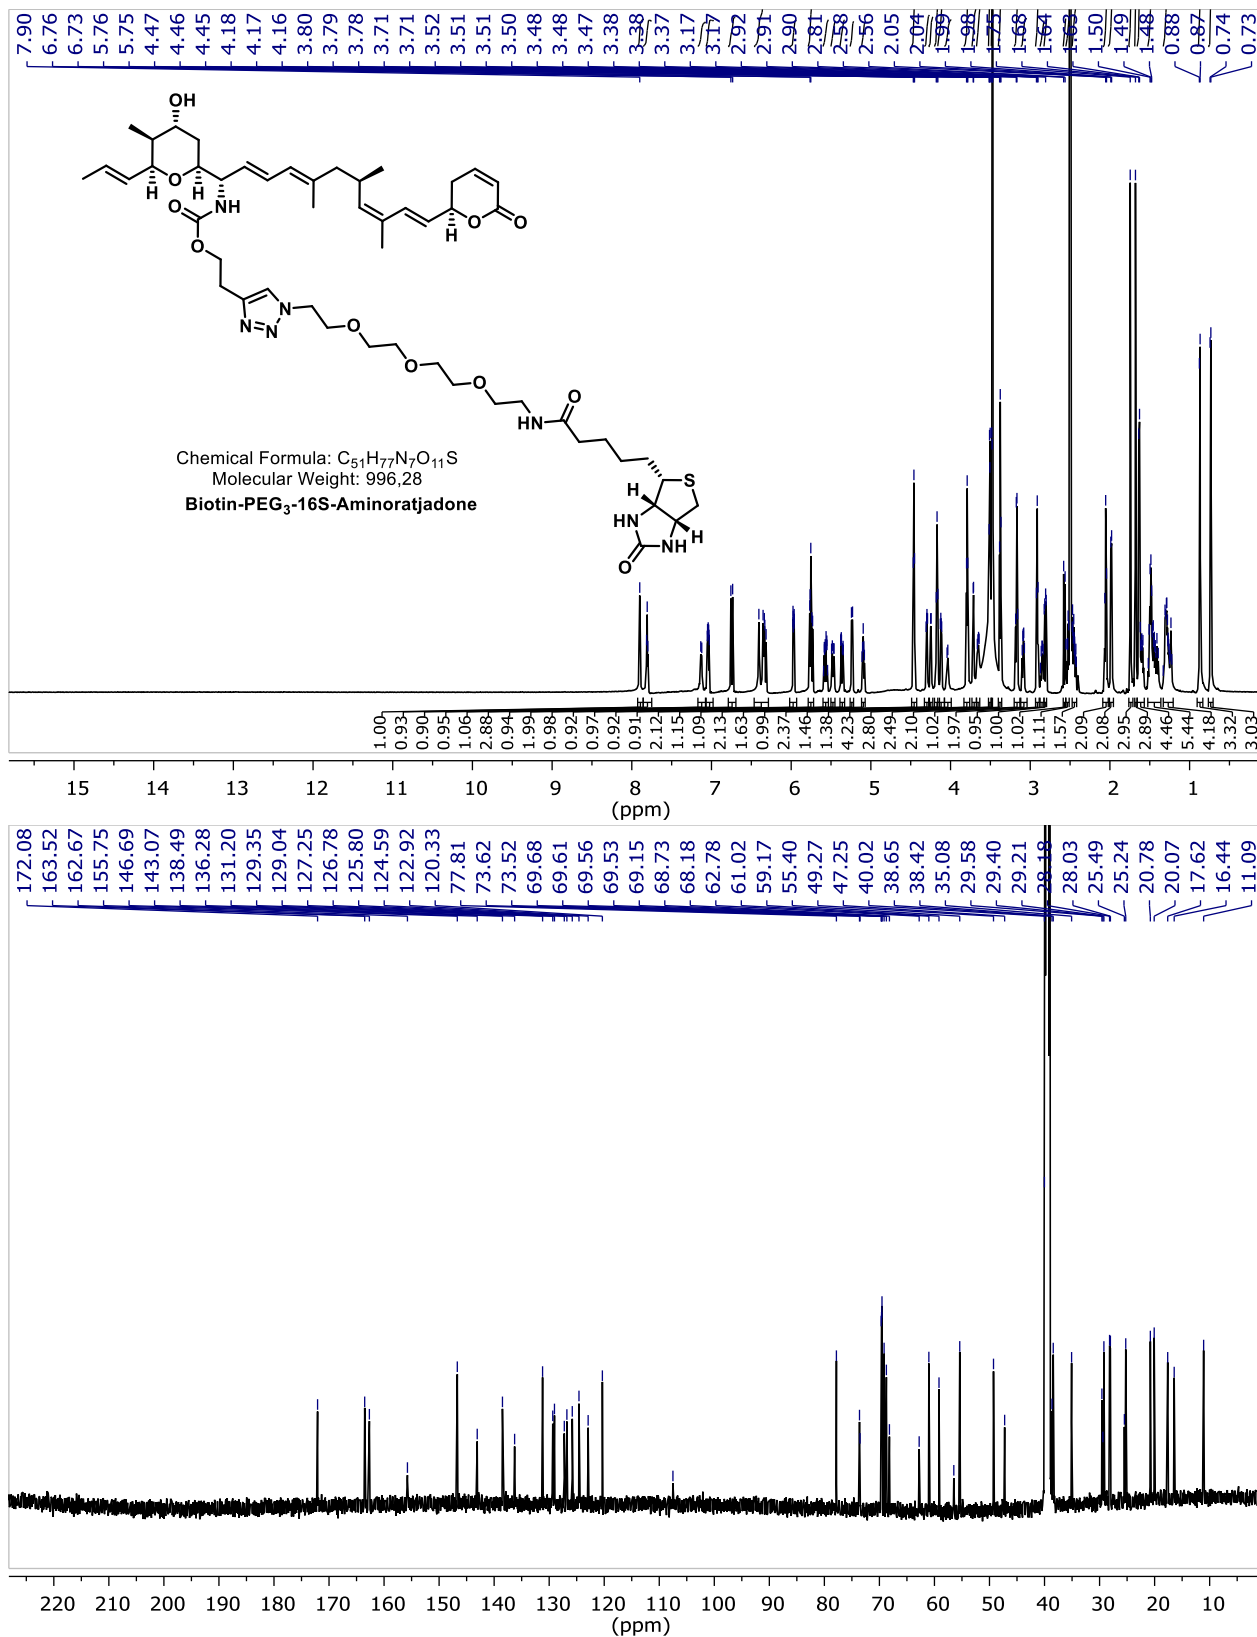

## FA-1-Val-Cit-pABA-16R-Aminoratjadone

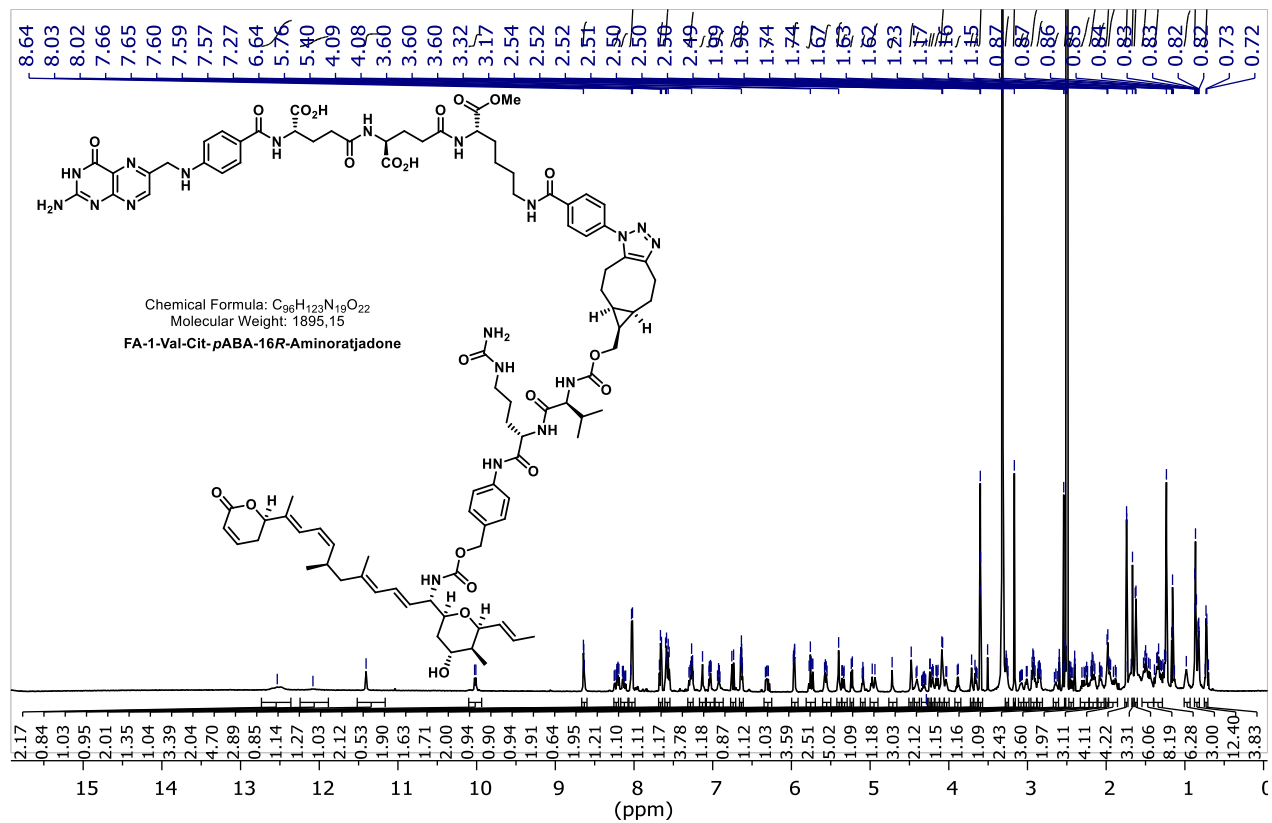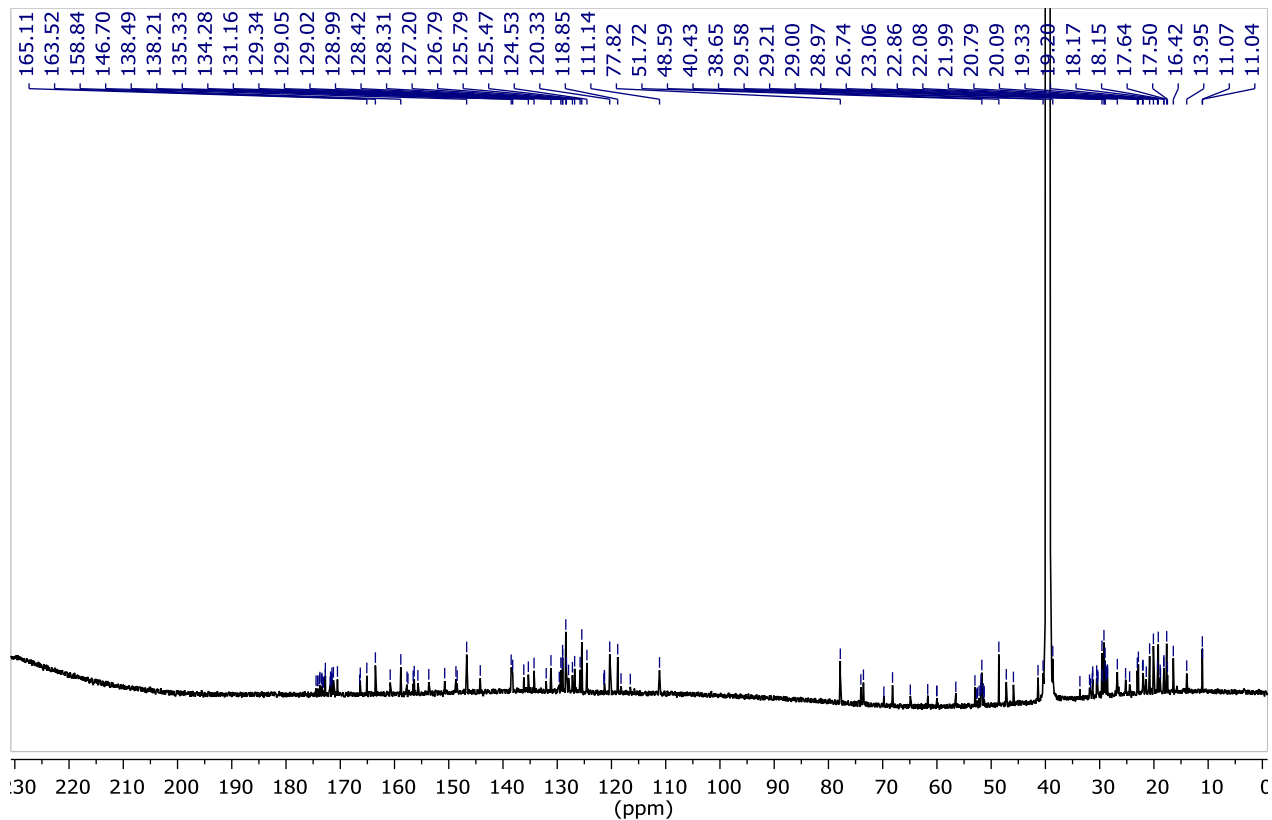

## FA-3-Val-Cit-pABA-16R-Aminoratjadone

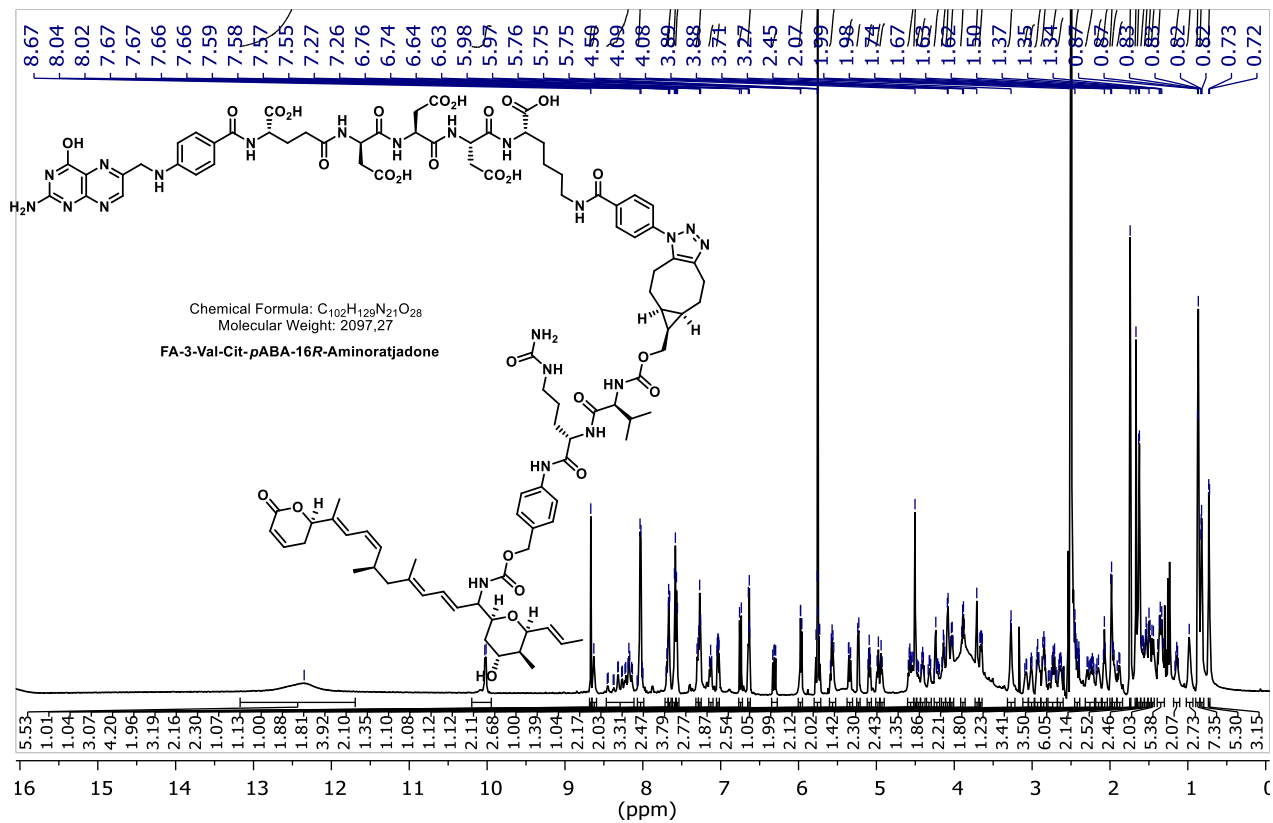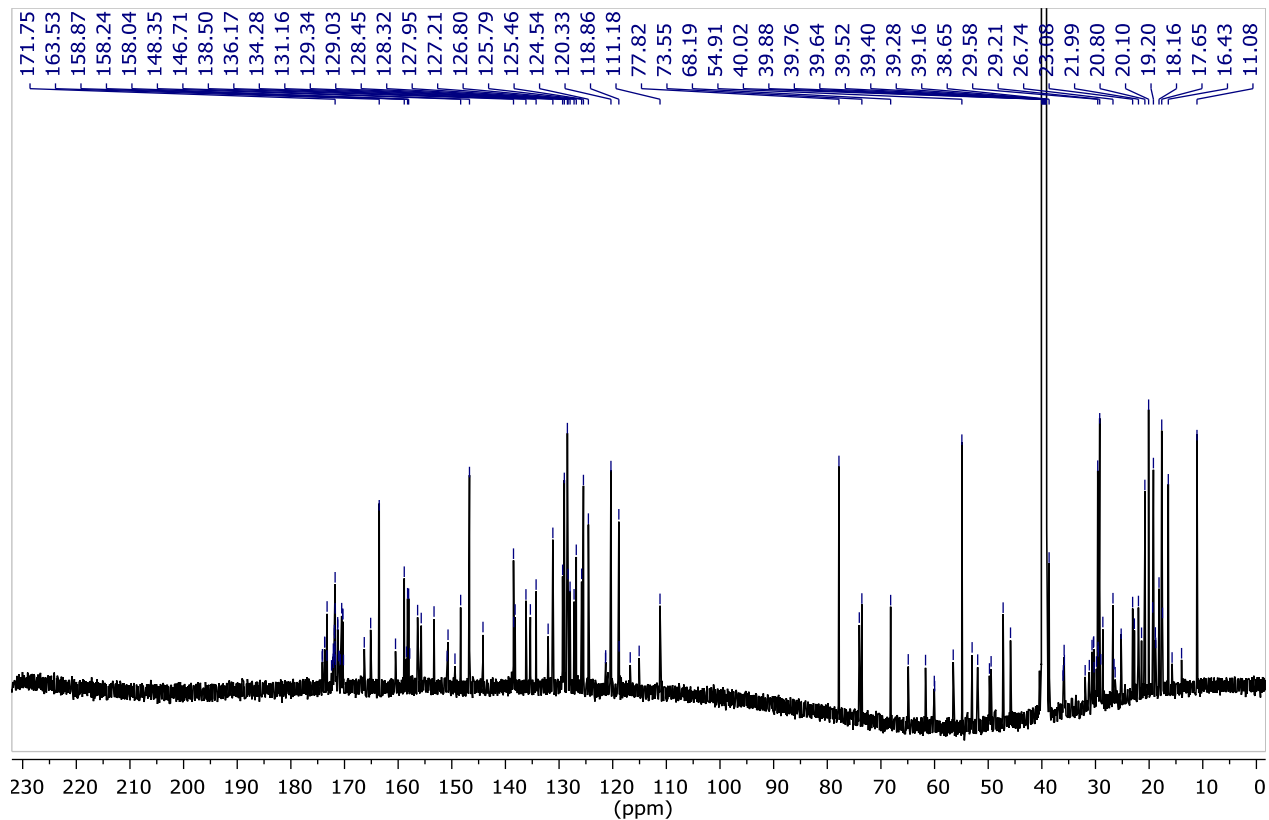

FA-4-(Val-Cit-pABA-16R-Aminoratjadone)<sub>2</sub>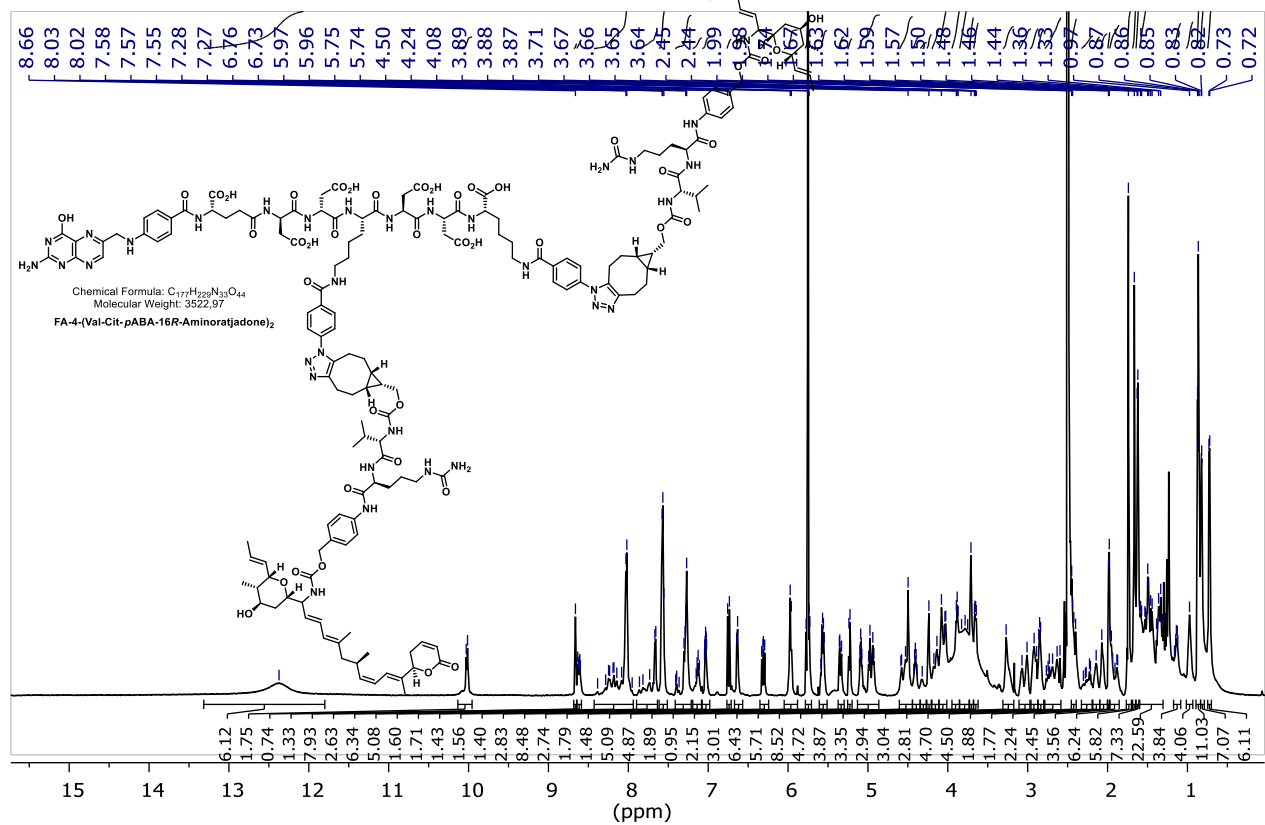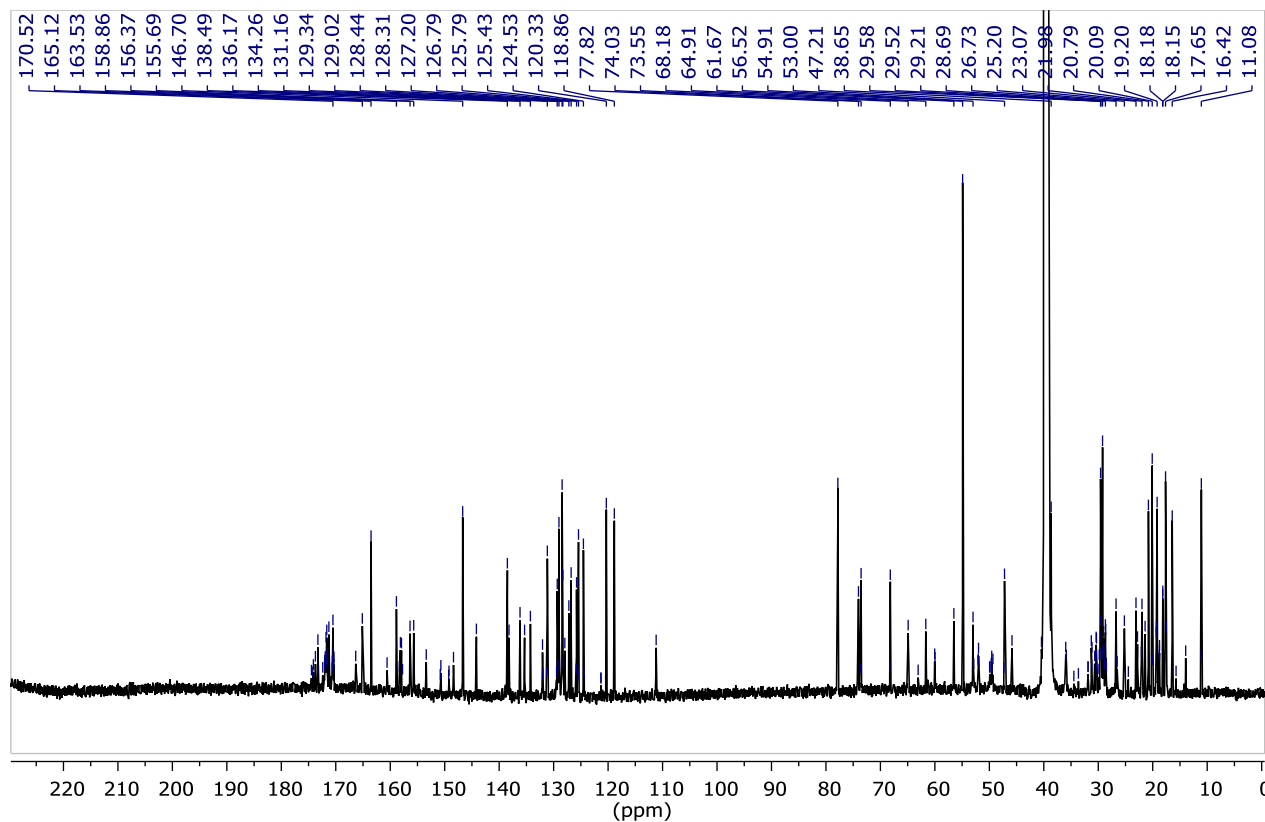

## FA-5-Val-Cit-pABA-16R-Aminoratjadone

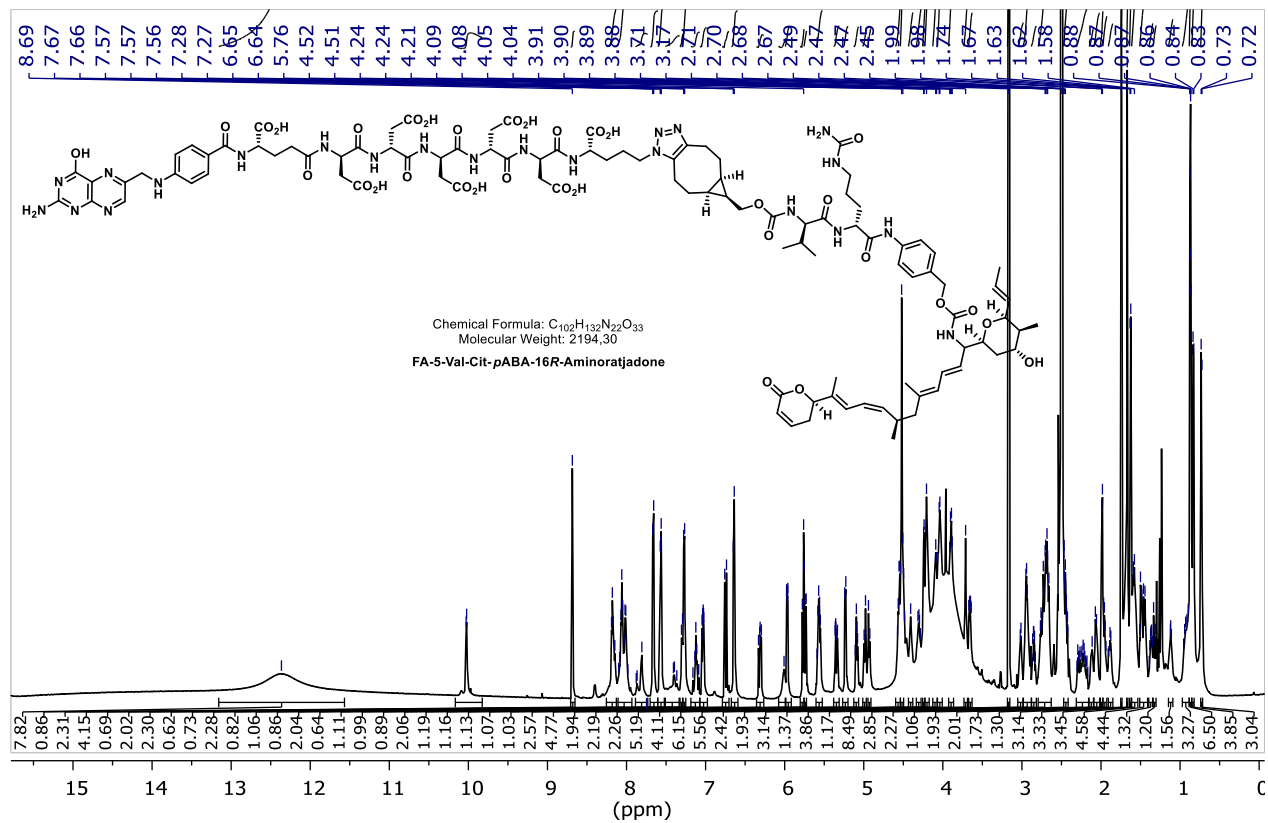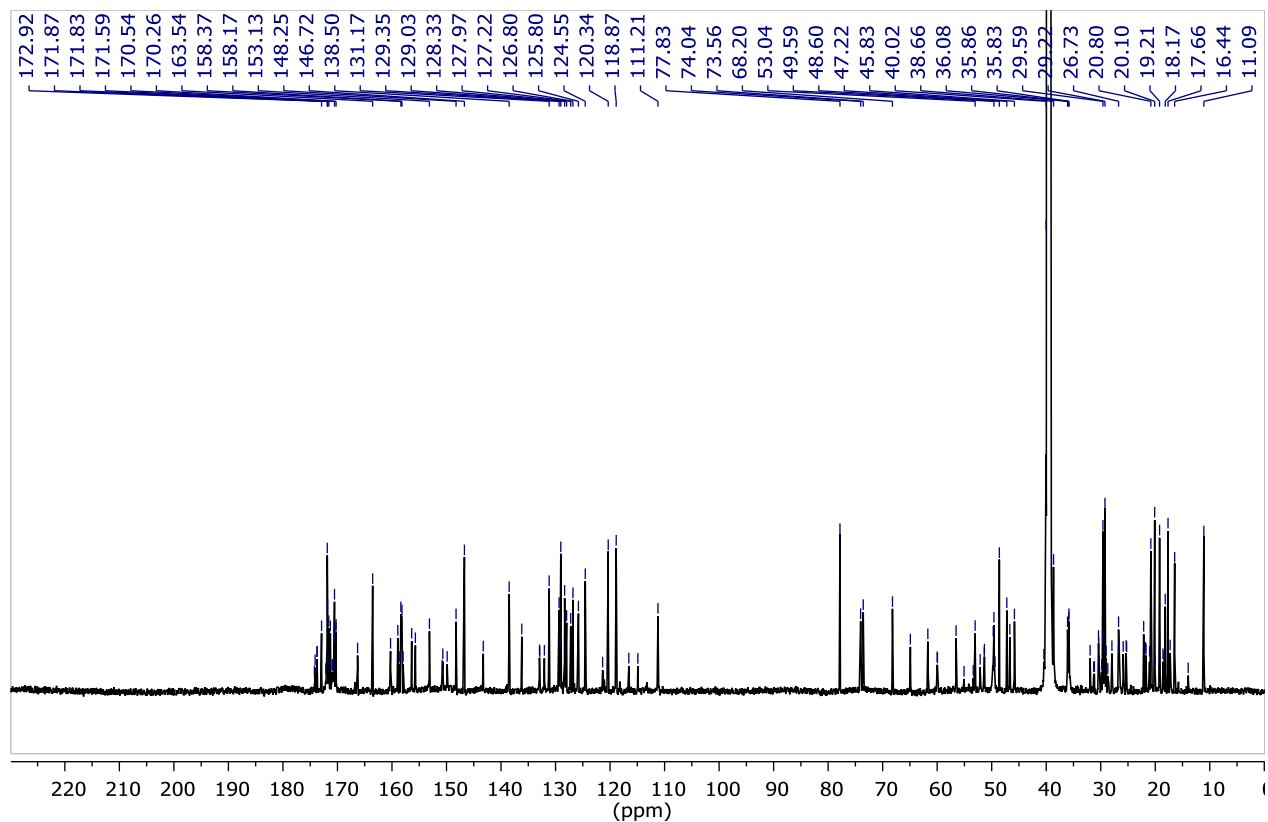

## FA-6-Val-Cit-pABA-16R-Aminoratjadone

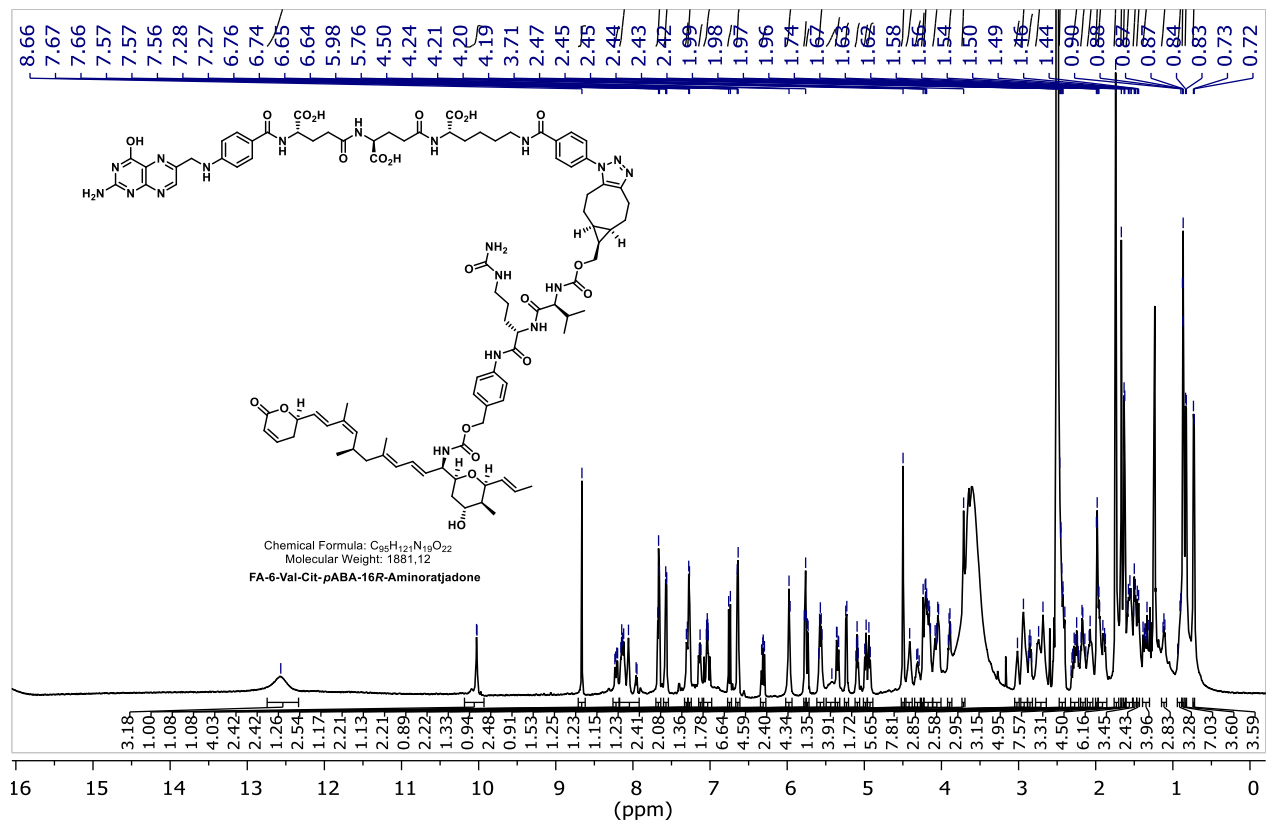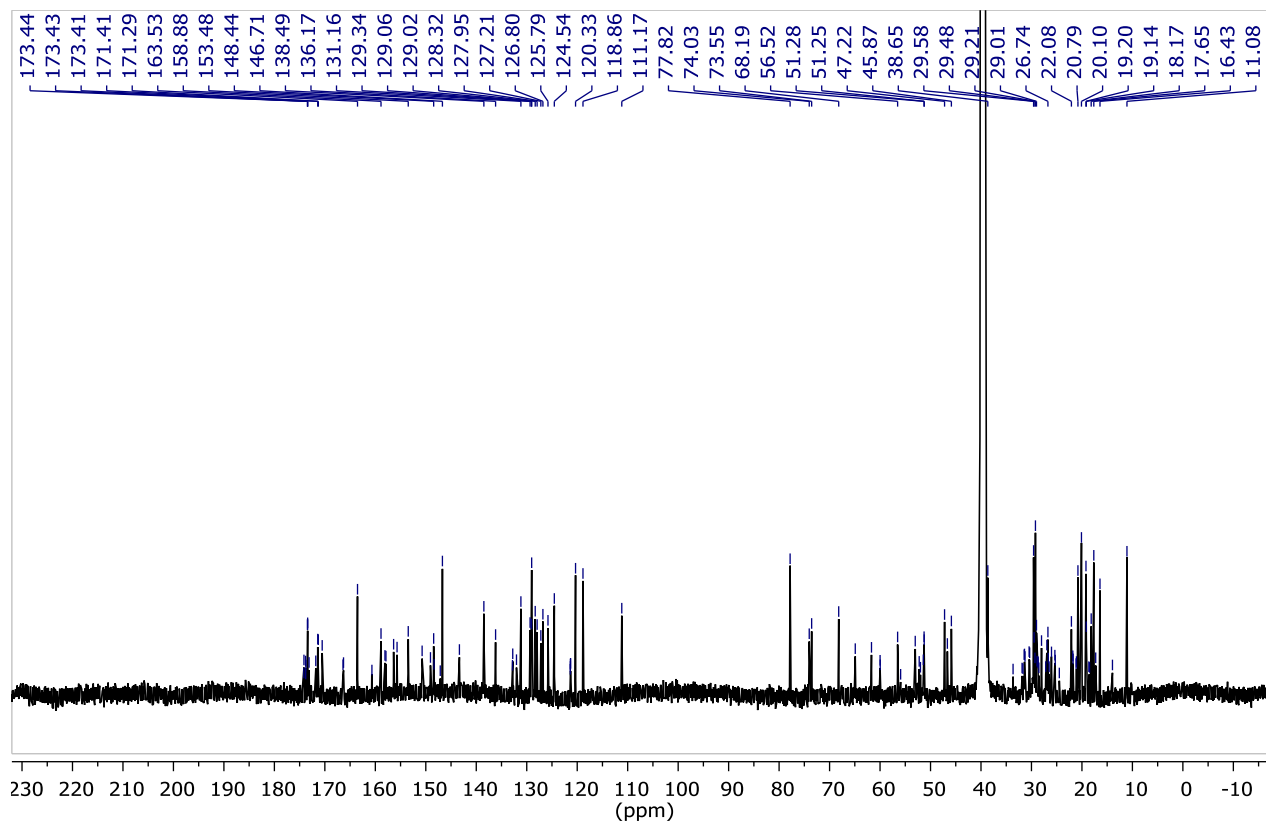

## FA-7-Val-Cit-pABA-16R-Aminoratjadone

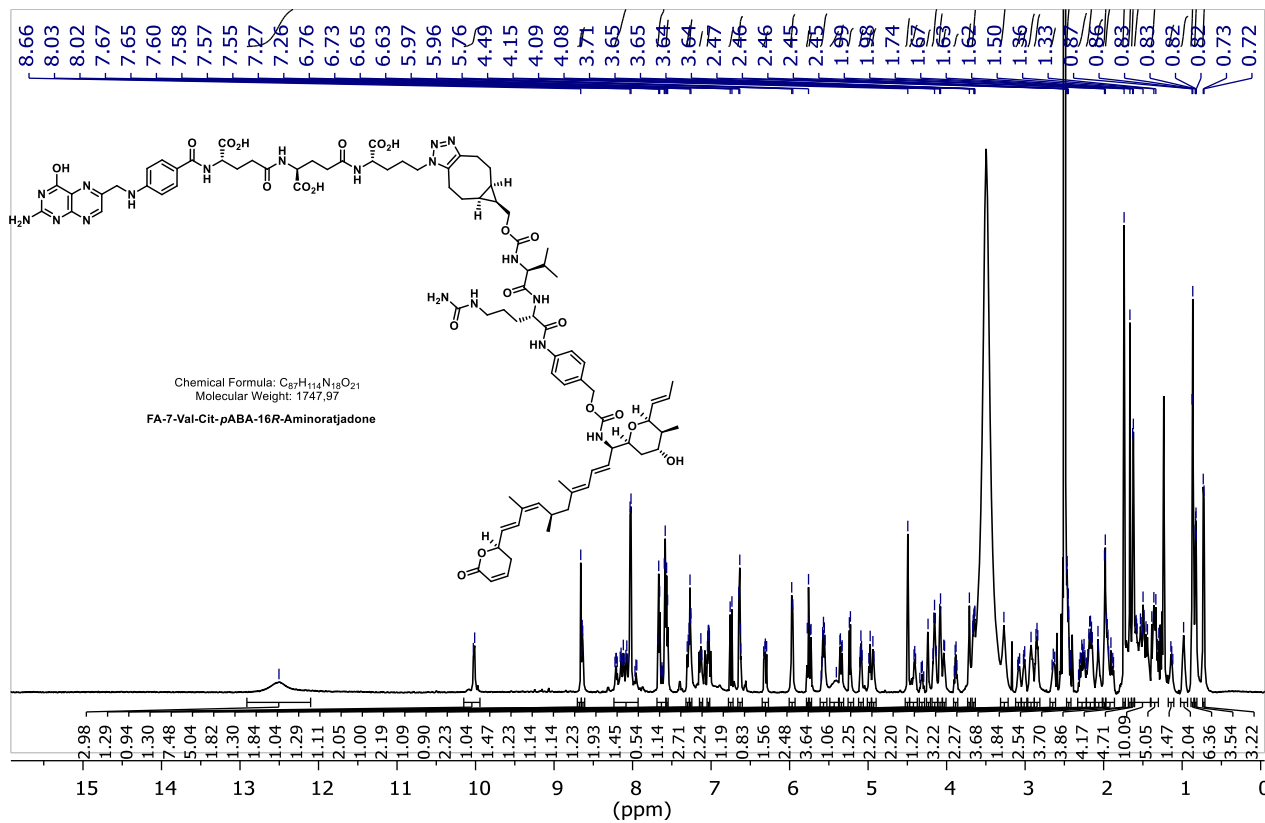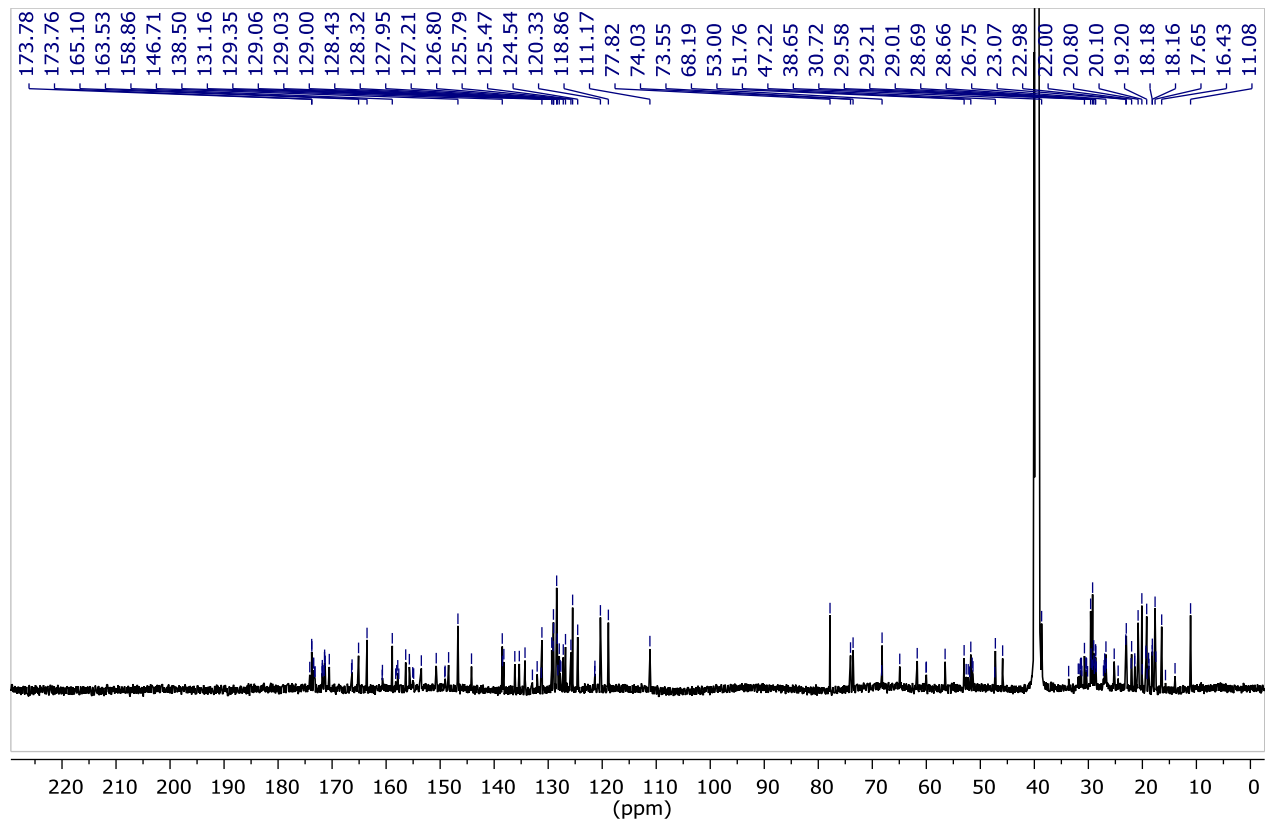

## FA-8-Val-Cit-pABA-16R-Aminoratjadone

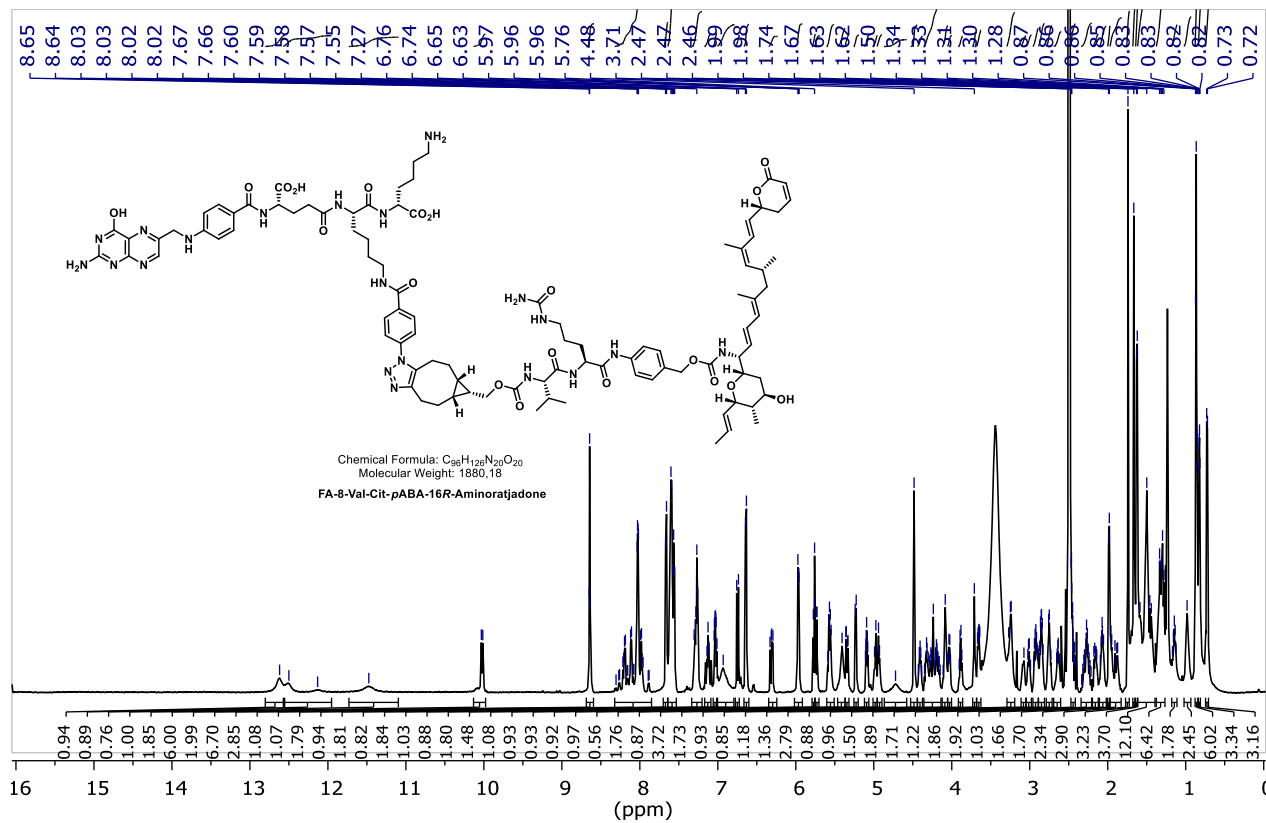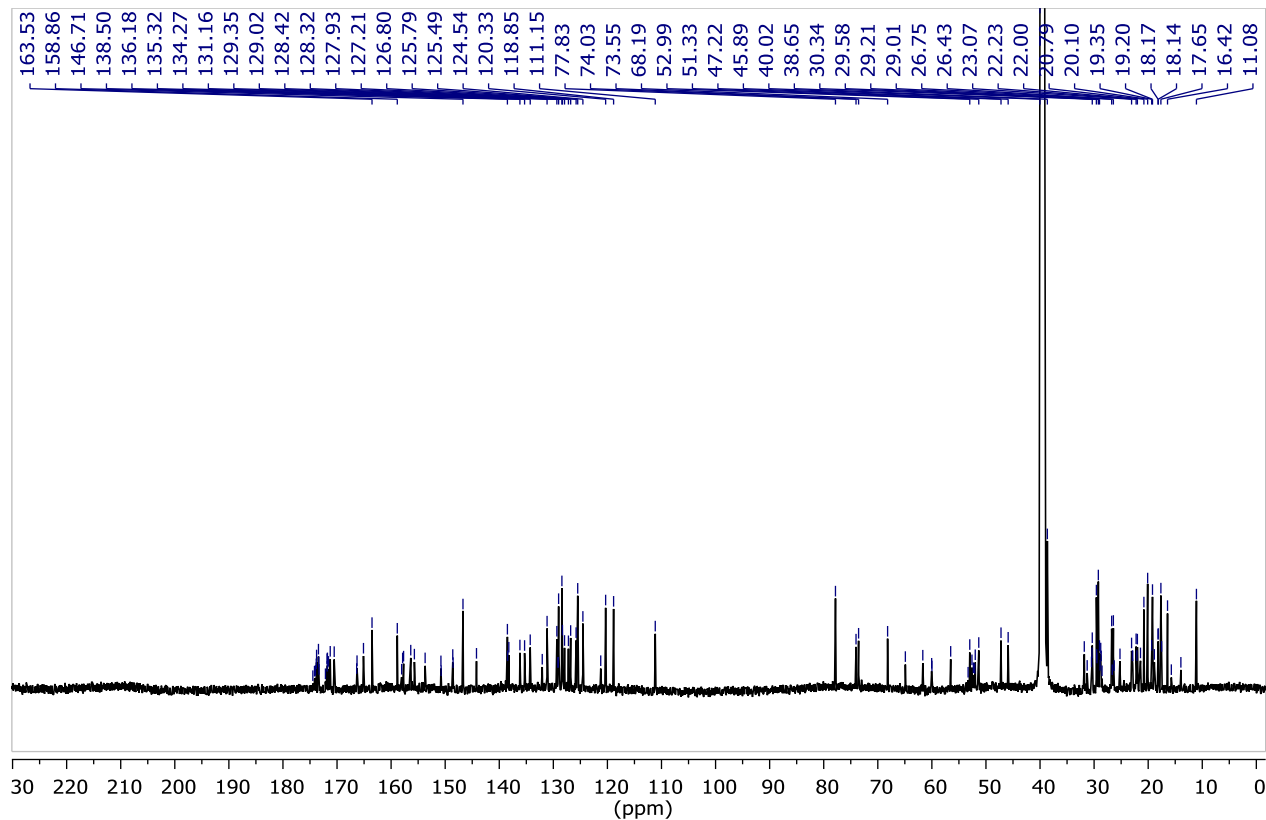



## FA-9-Val-Cit-pABA-16R-Aminoratjadone

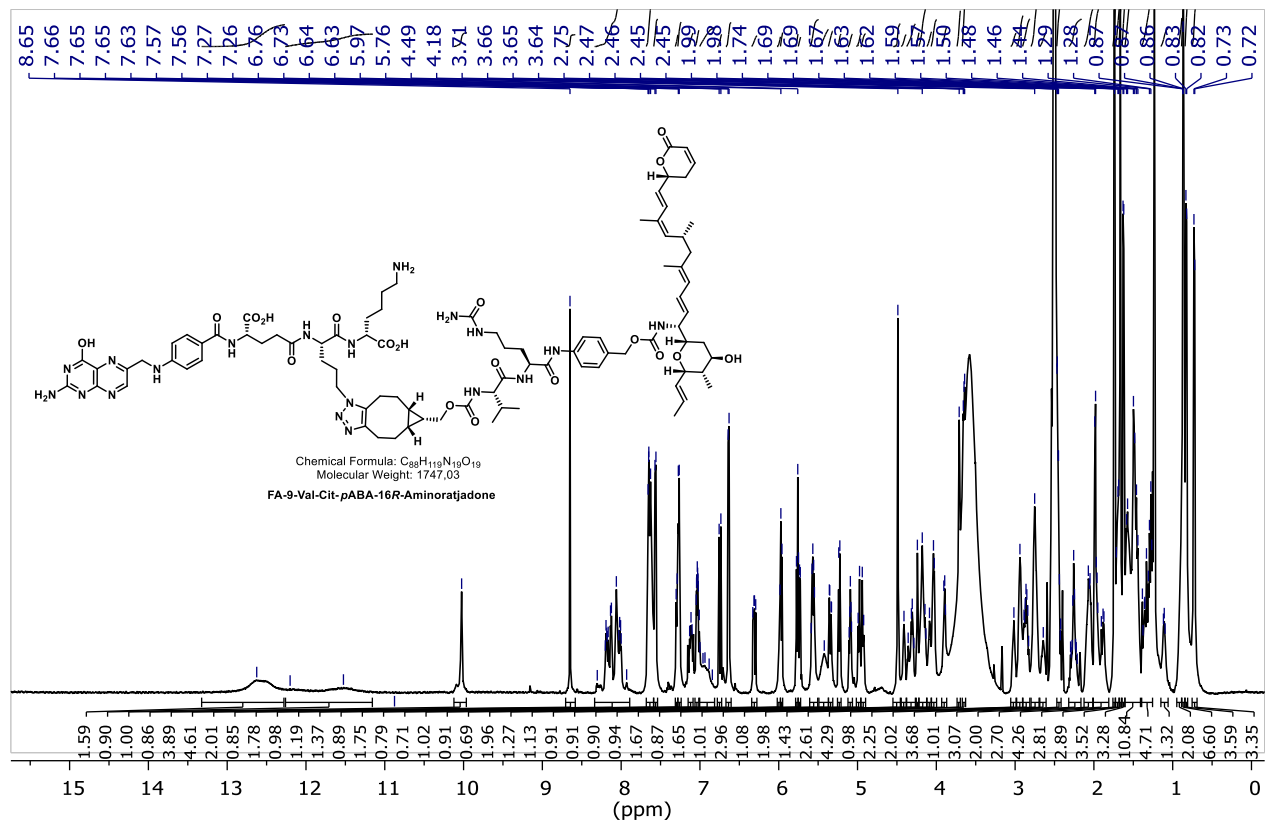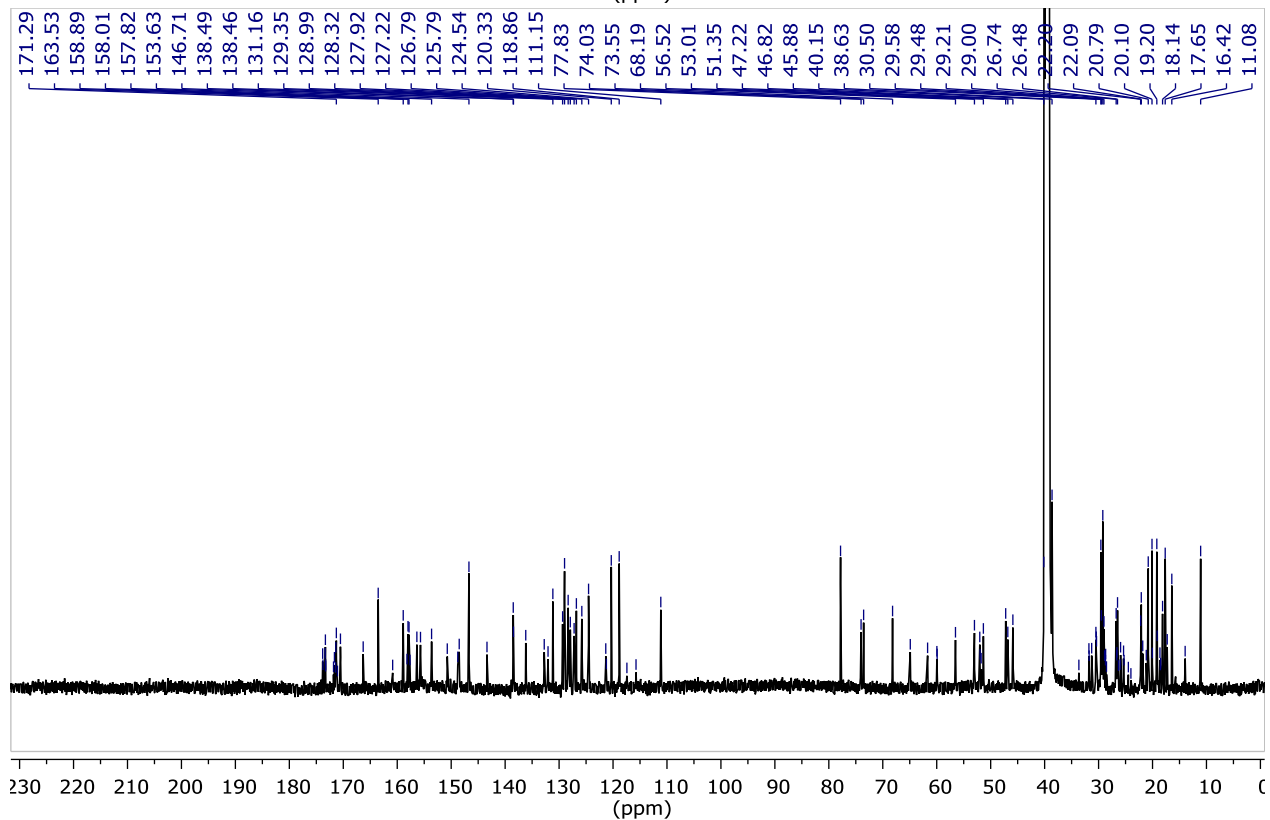

## FA-10-Val-Cit-pABA-16R-Aminoratjadone

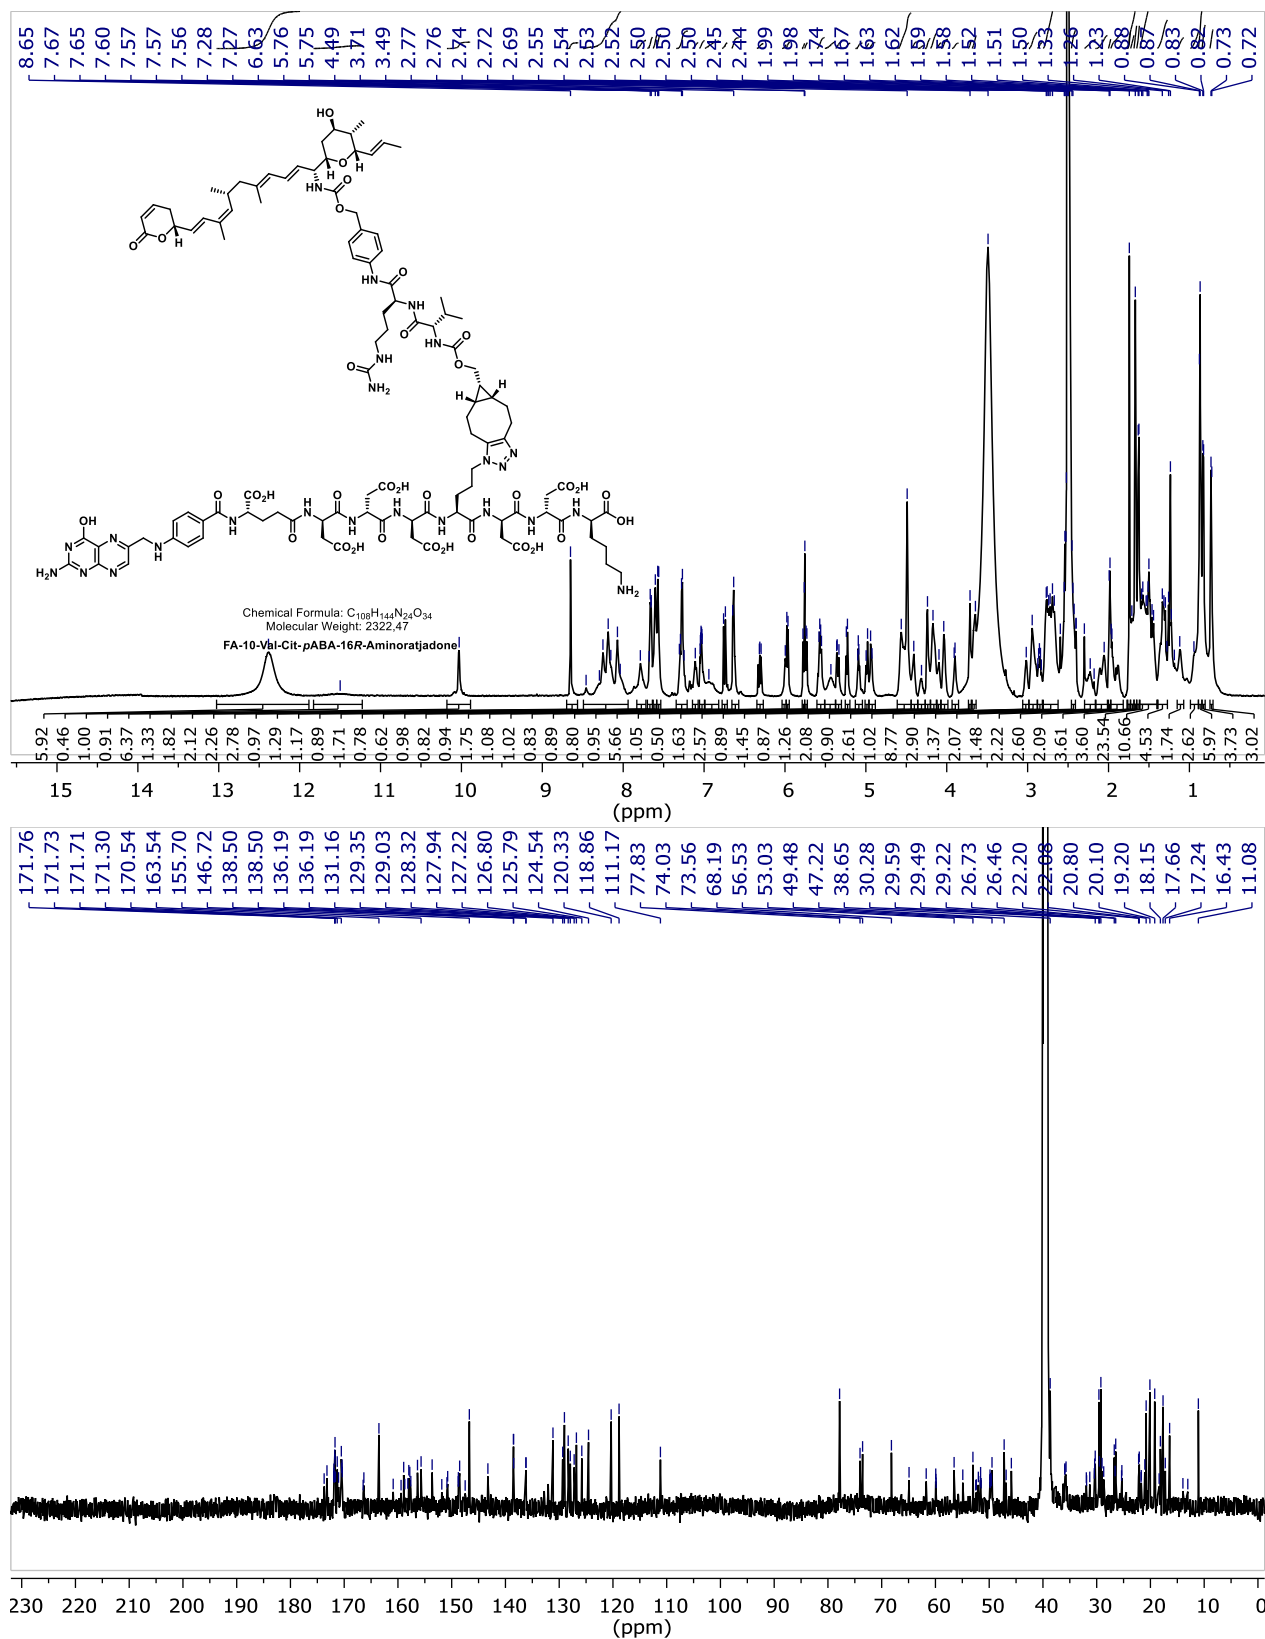

FA-11-(Val-Cit-pABA-16R-Aminoratjadone)<sub>3</sub>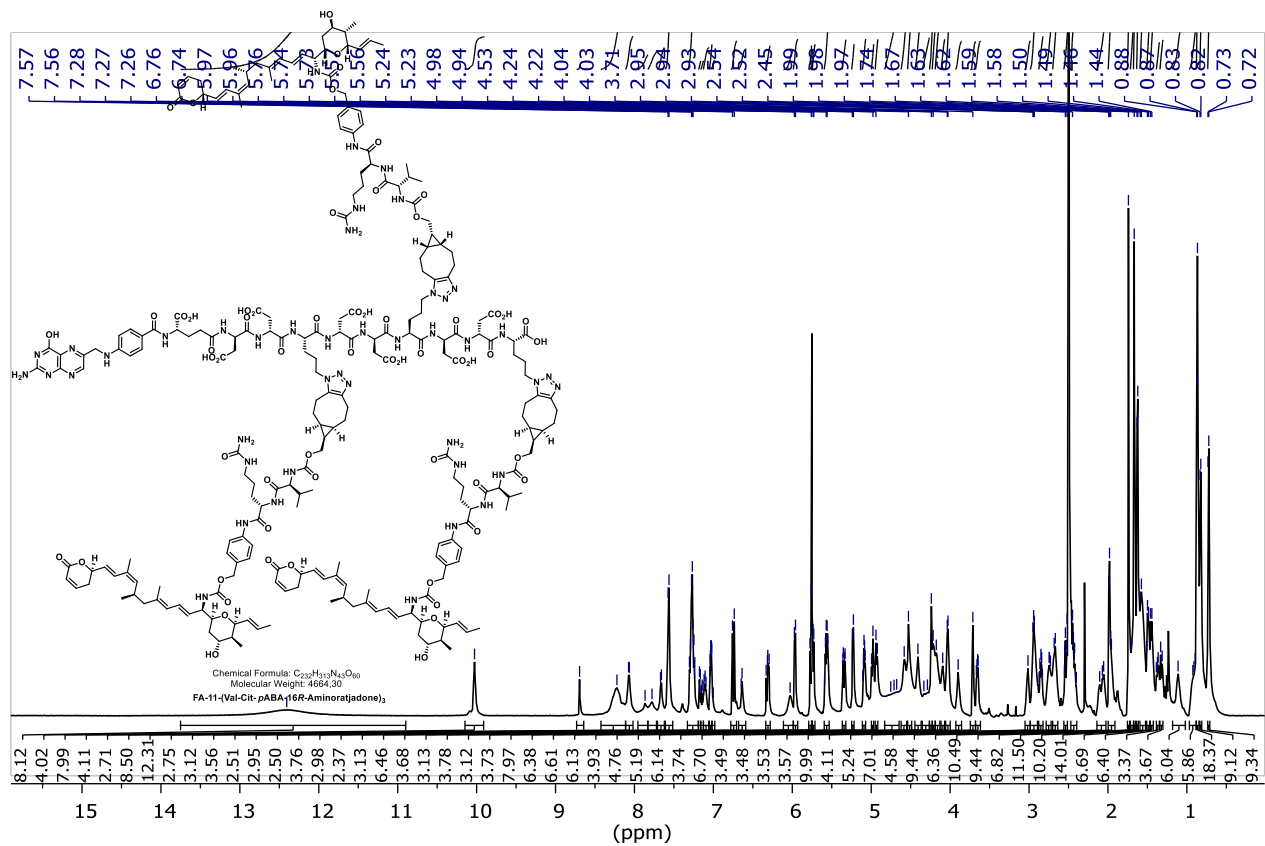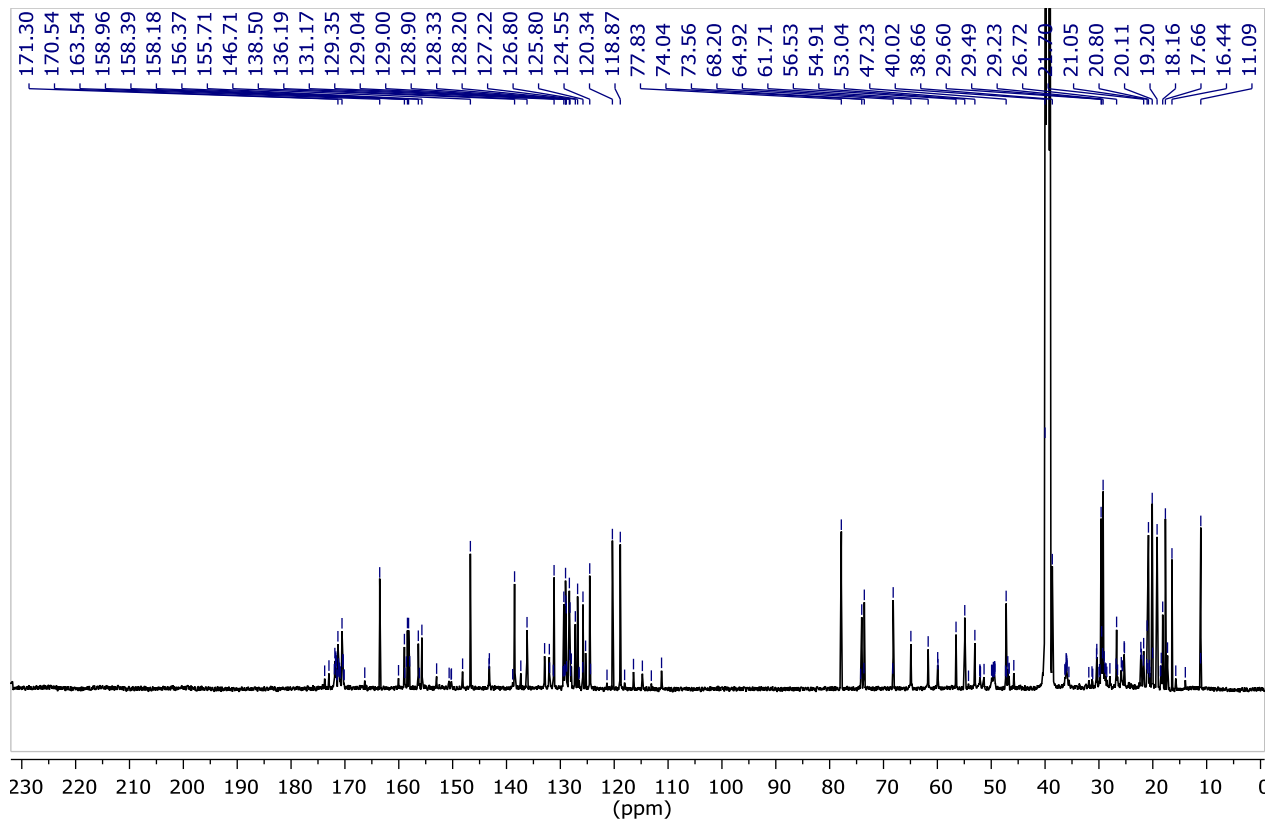

## FA-3-L-16R-Aminoratjadone

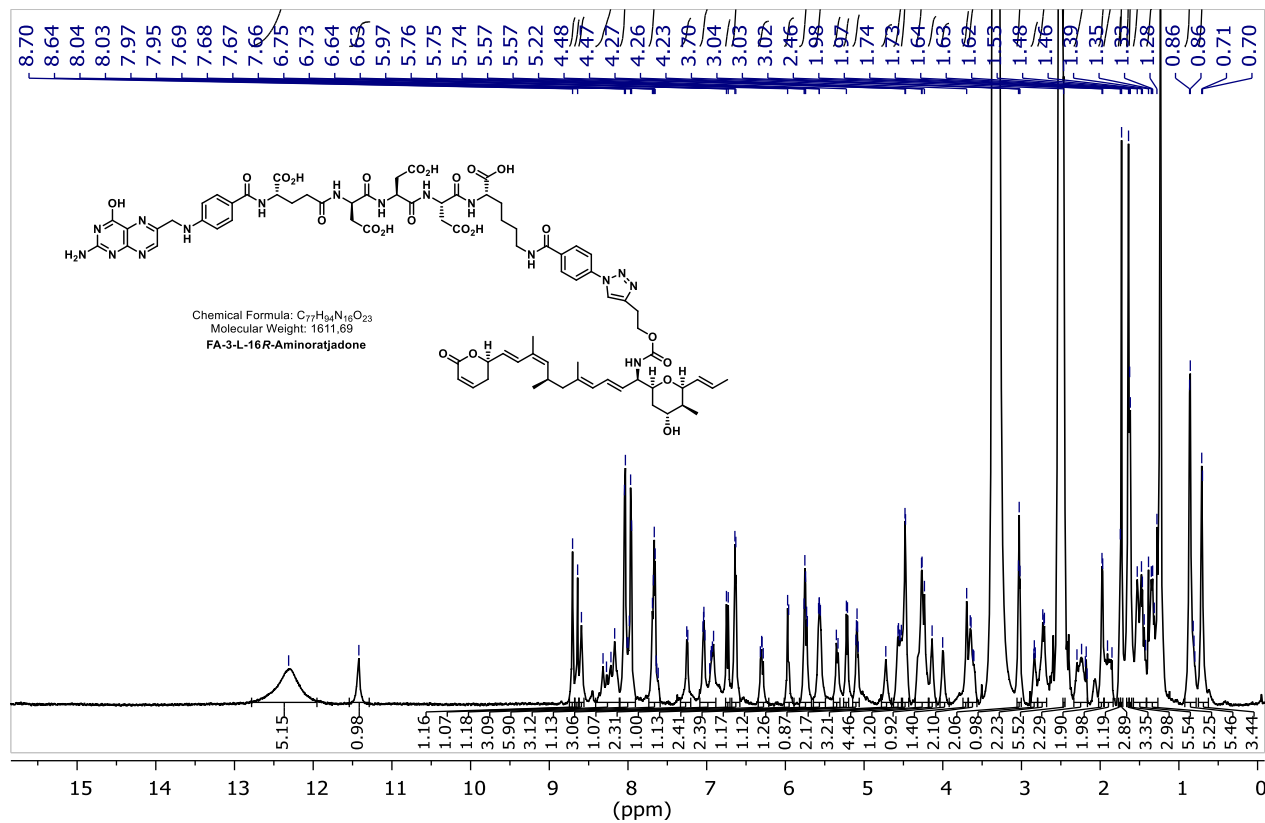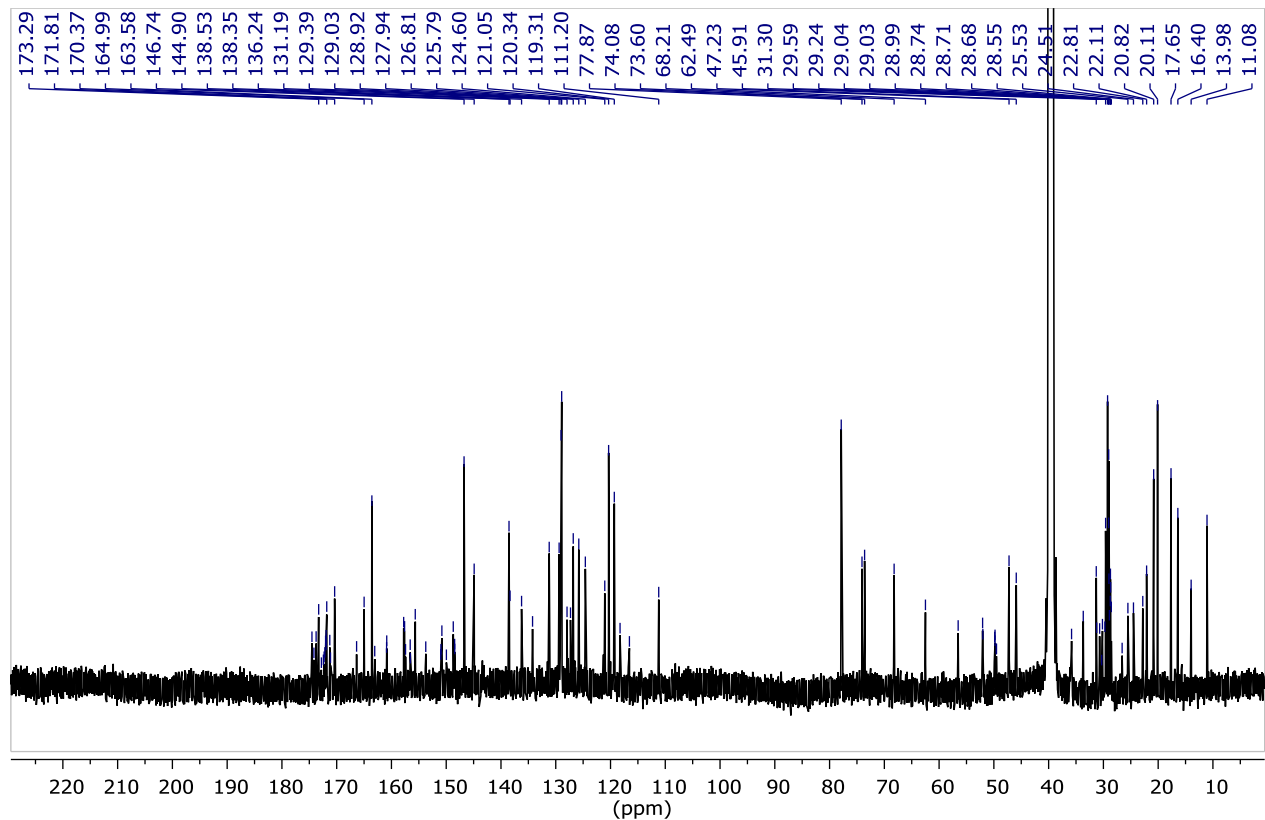

## FA-3b-L-16R-Aminoratjadone

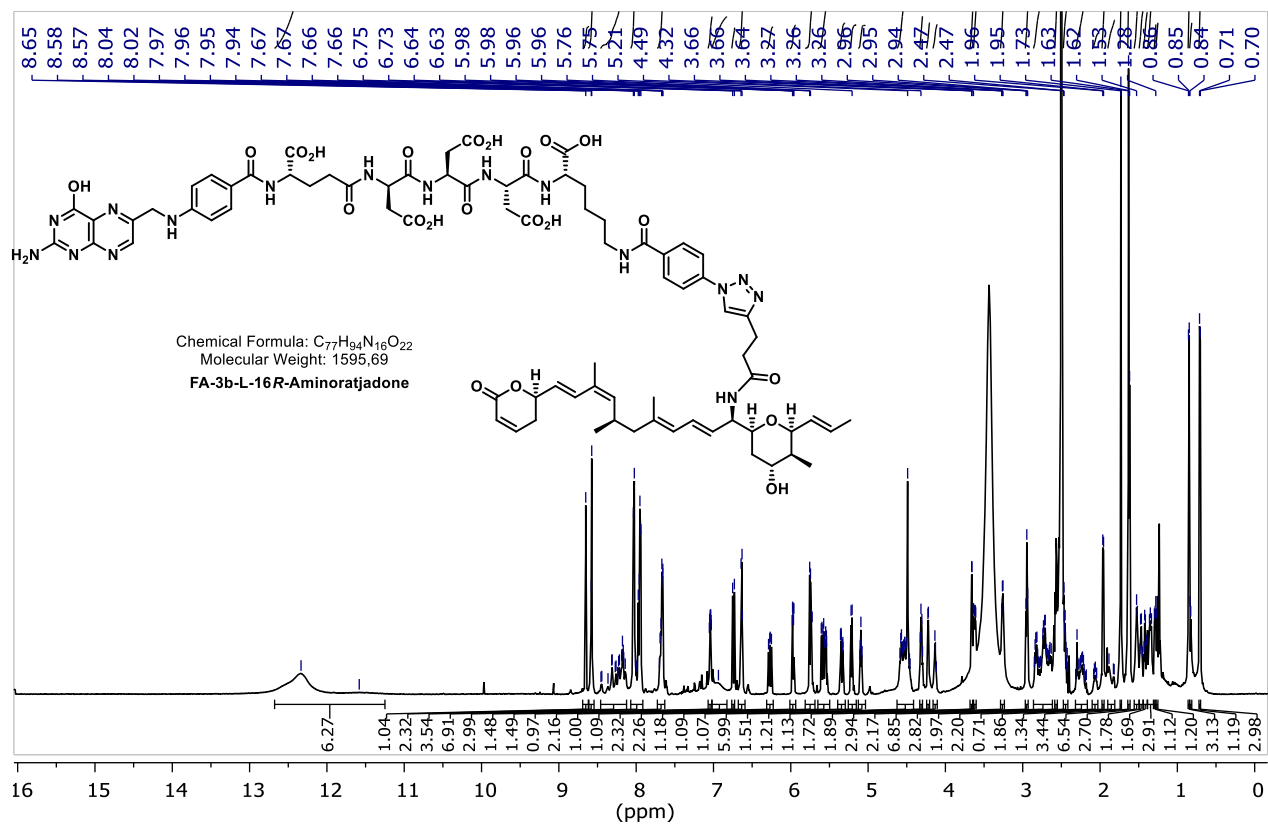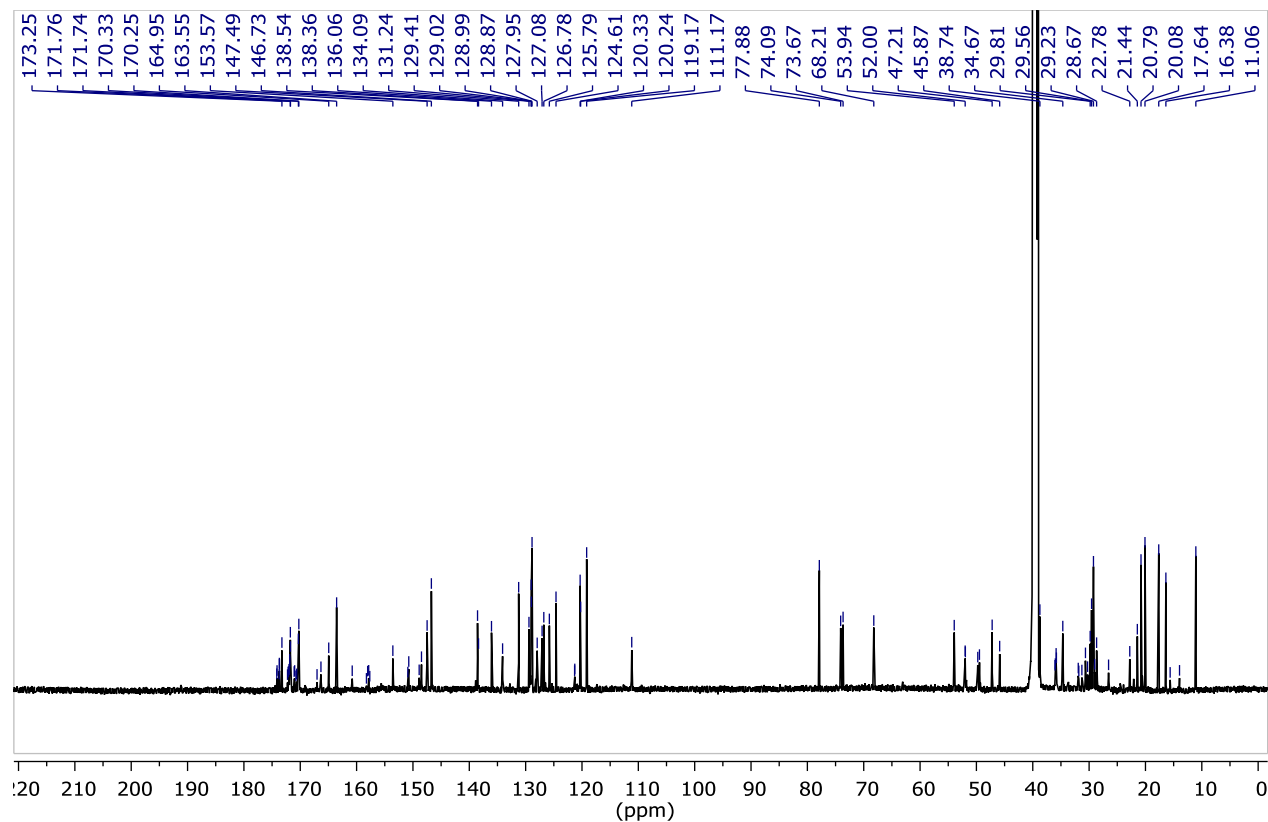

## FA-5-L-16R-Aminoratjadone

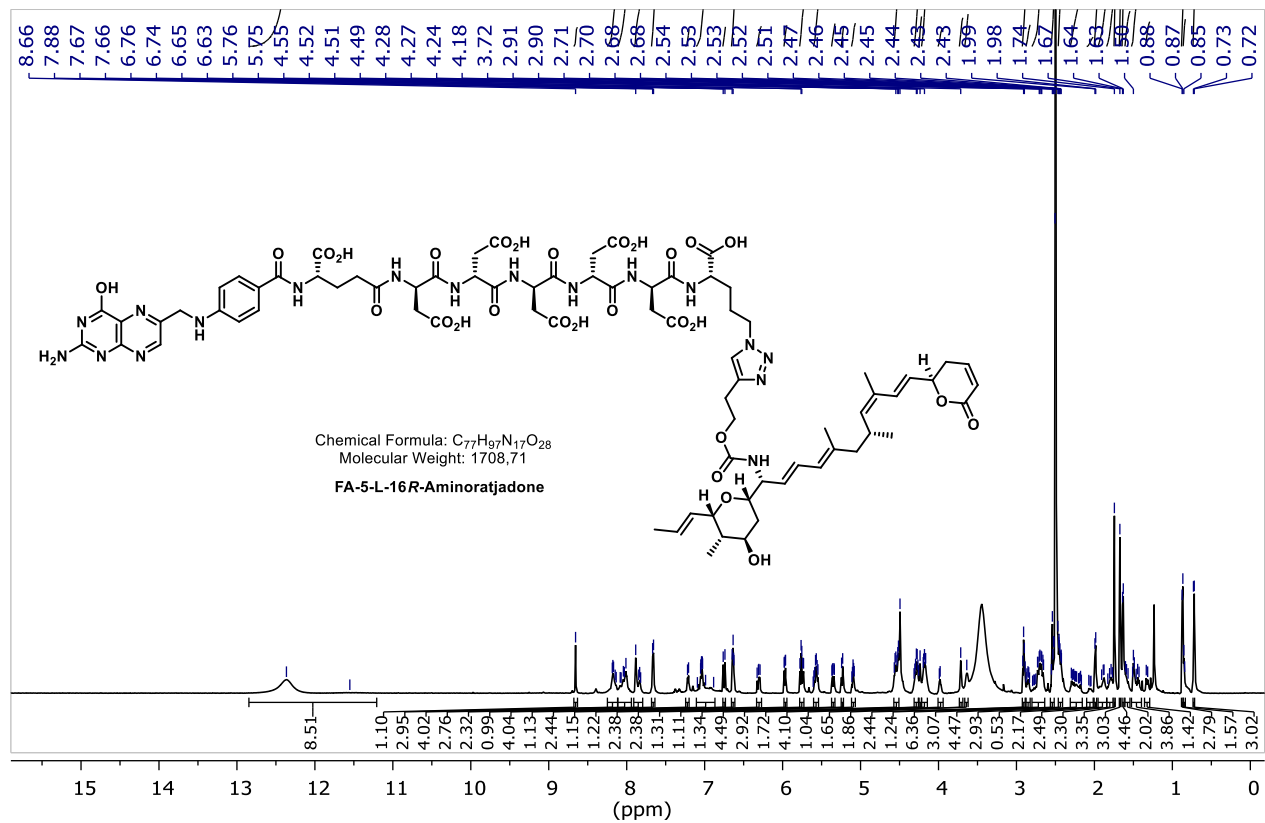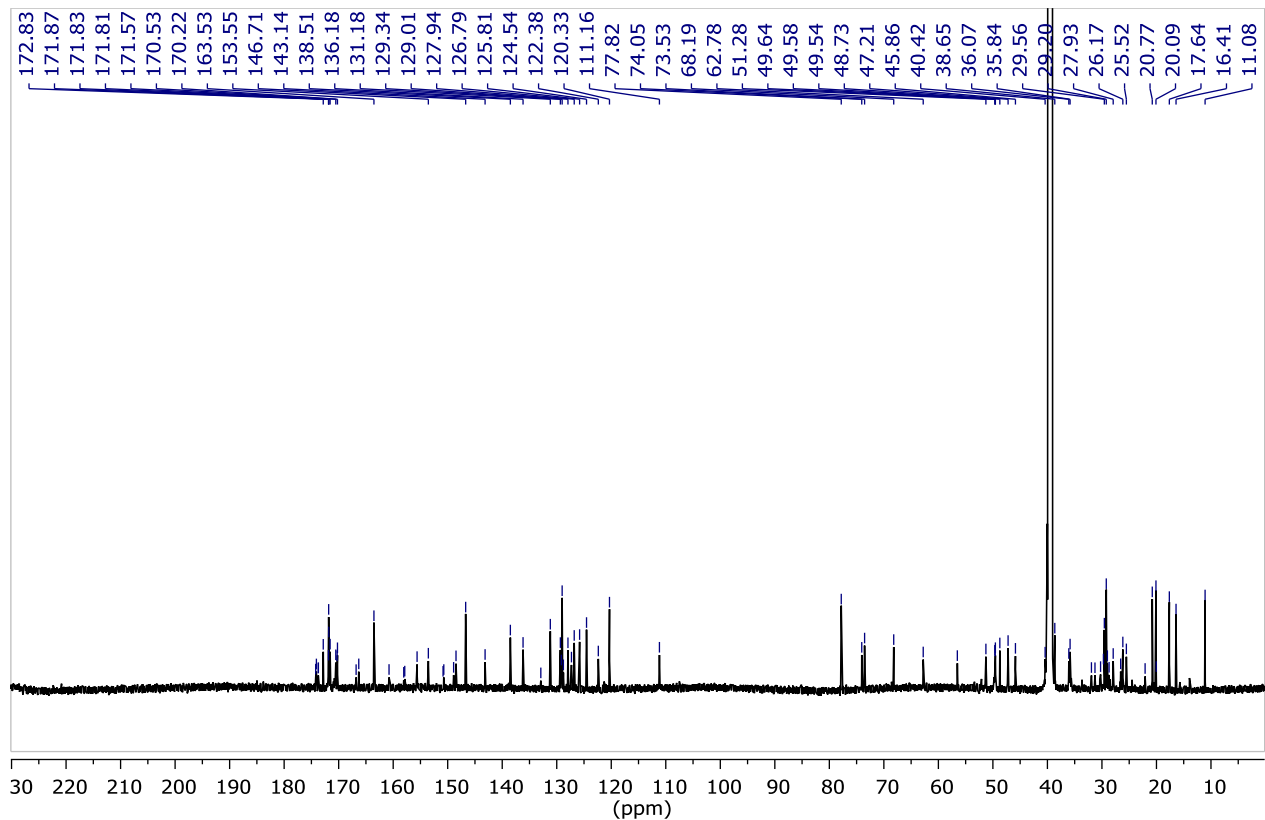

## FA-6-L-16R-Aminoratjadone

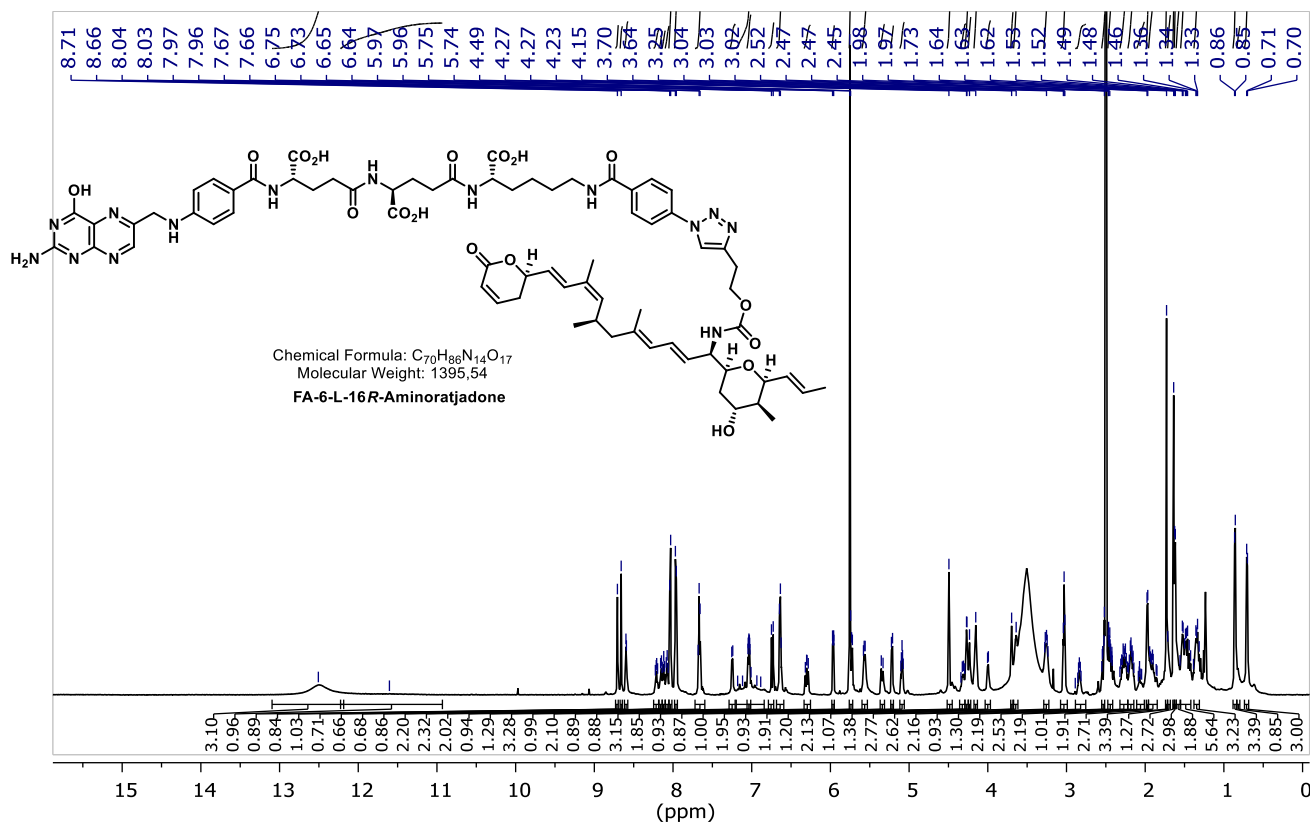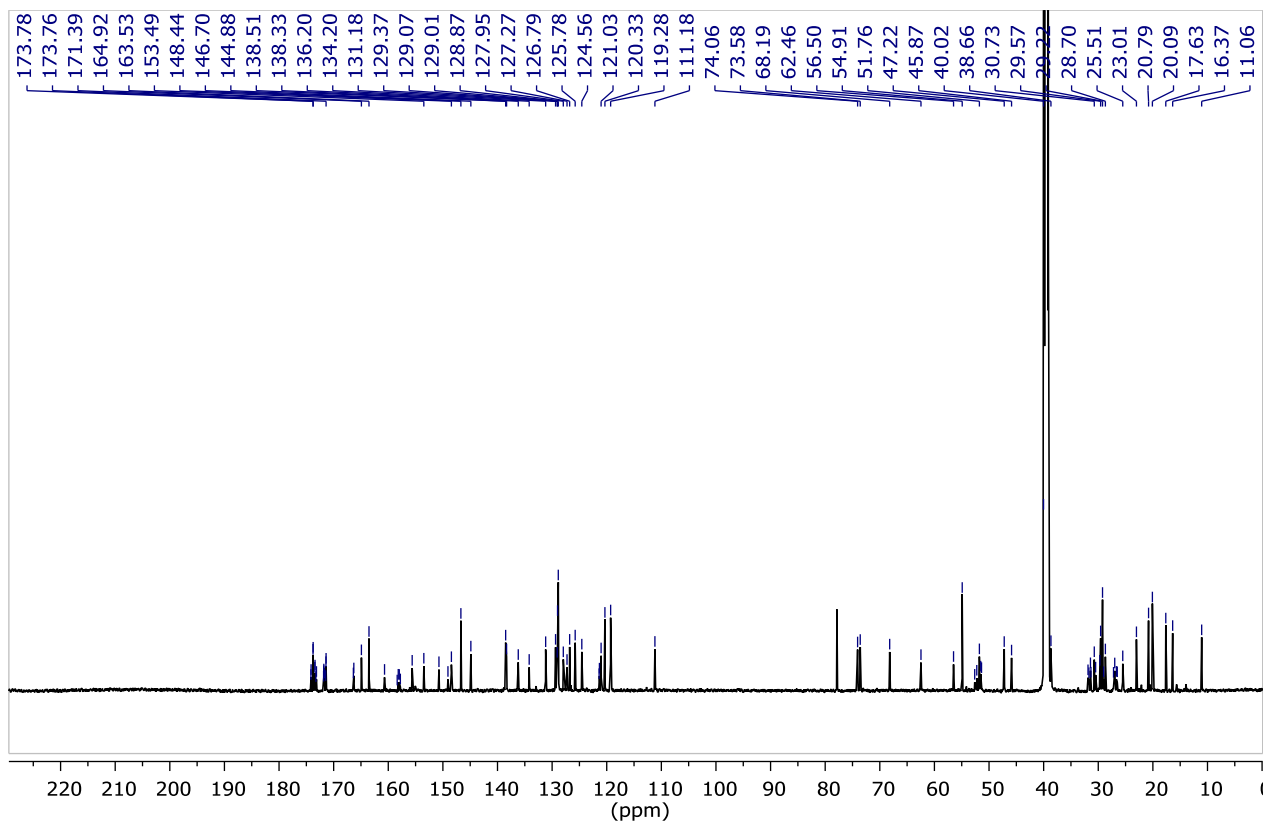

## FA-7-L-16R-Aminoratjadone

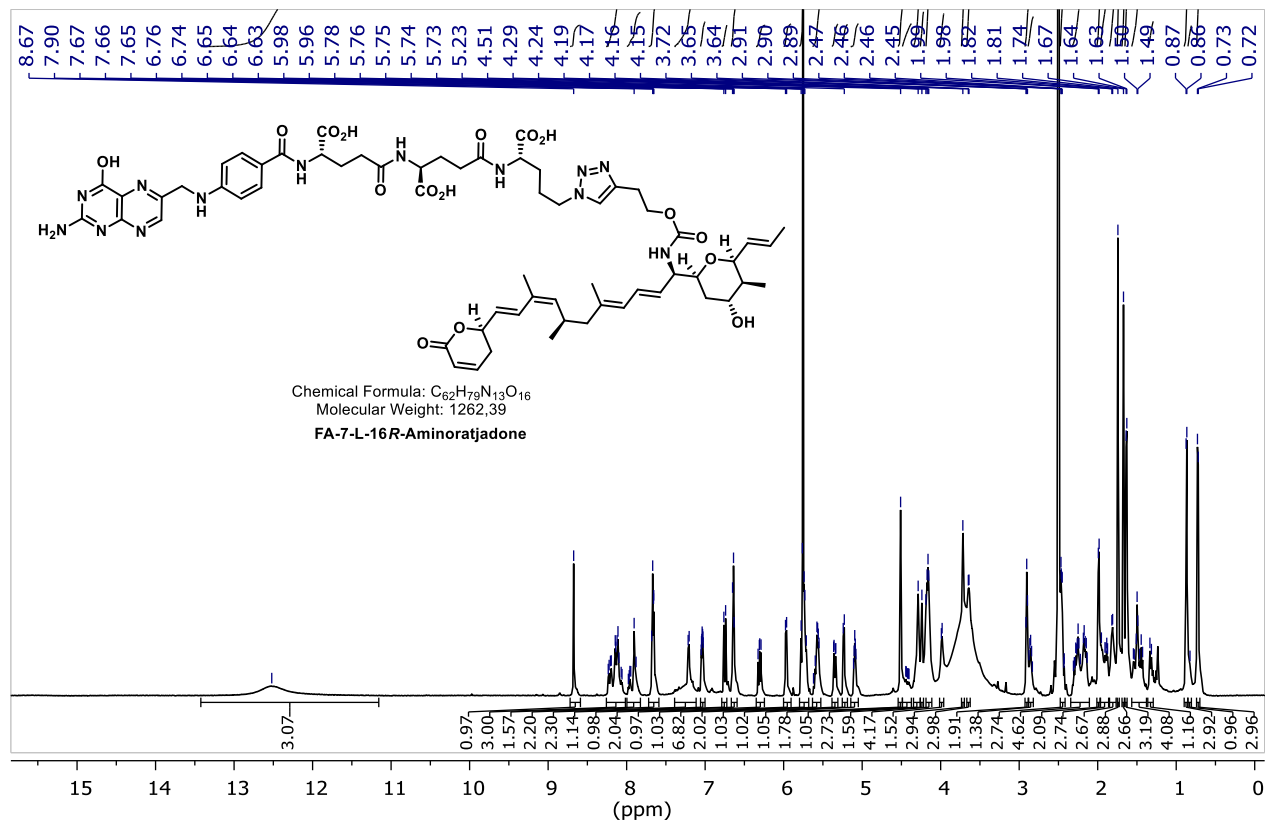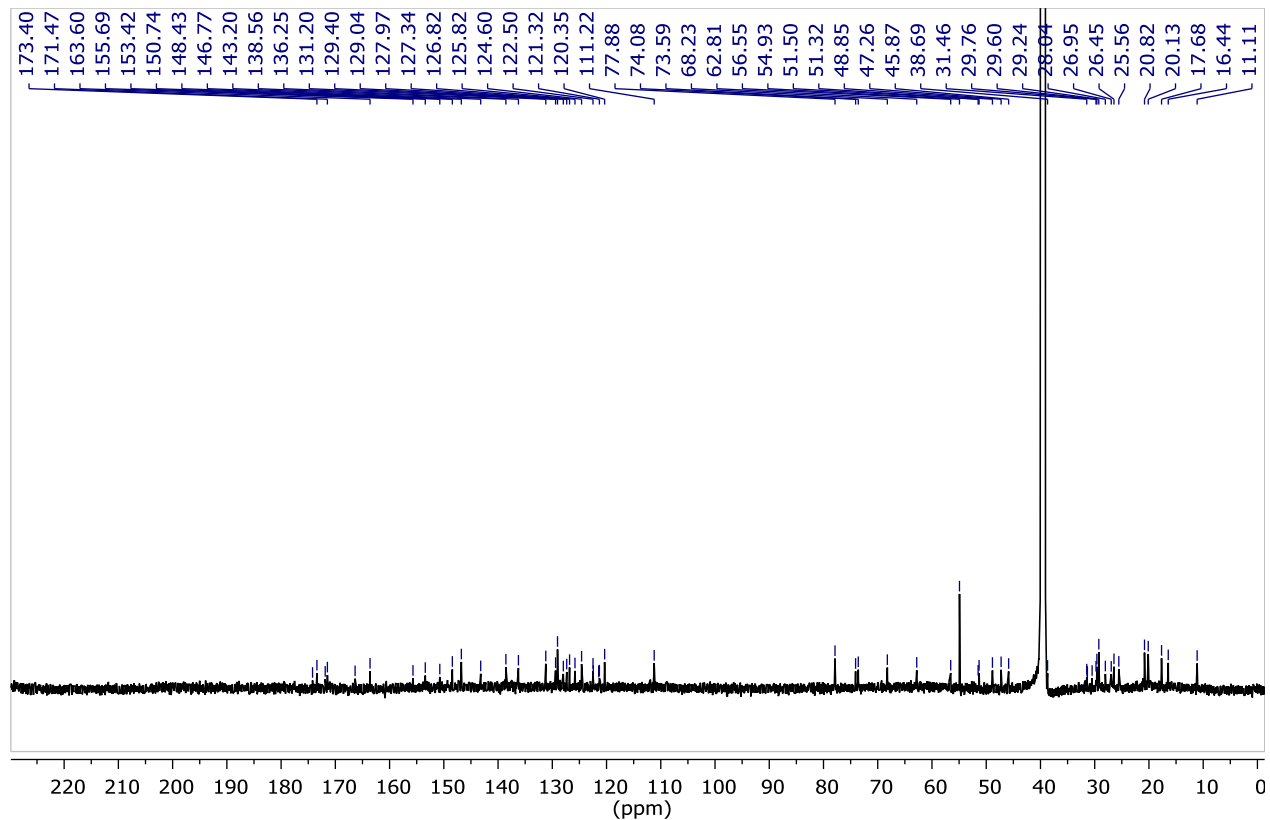



## FA-10-L-16R-Aminoratjadone

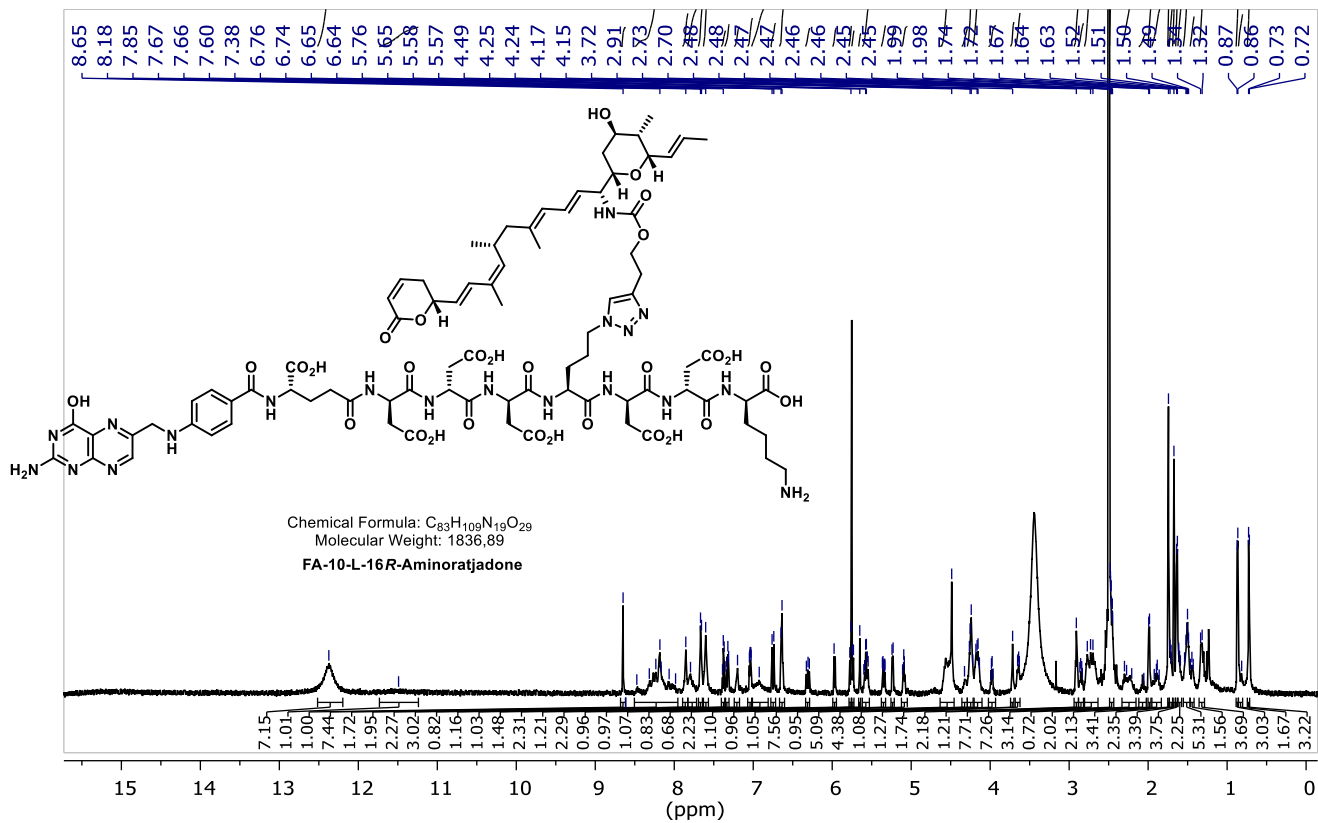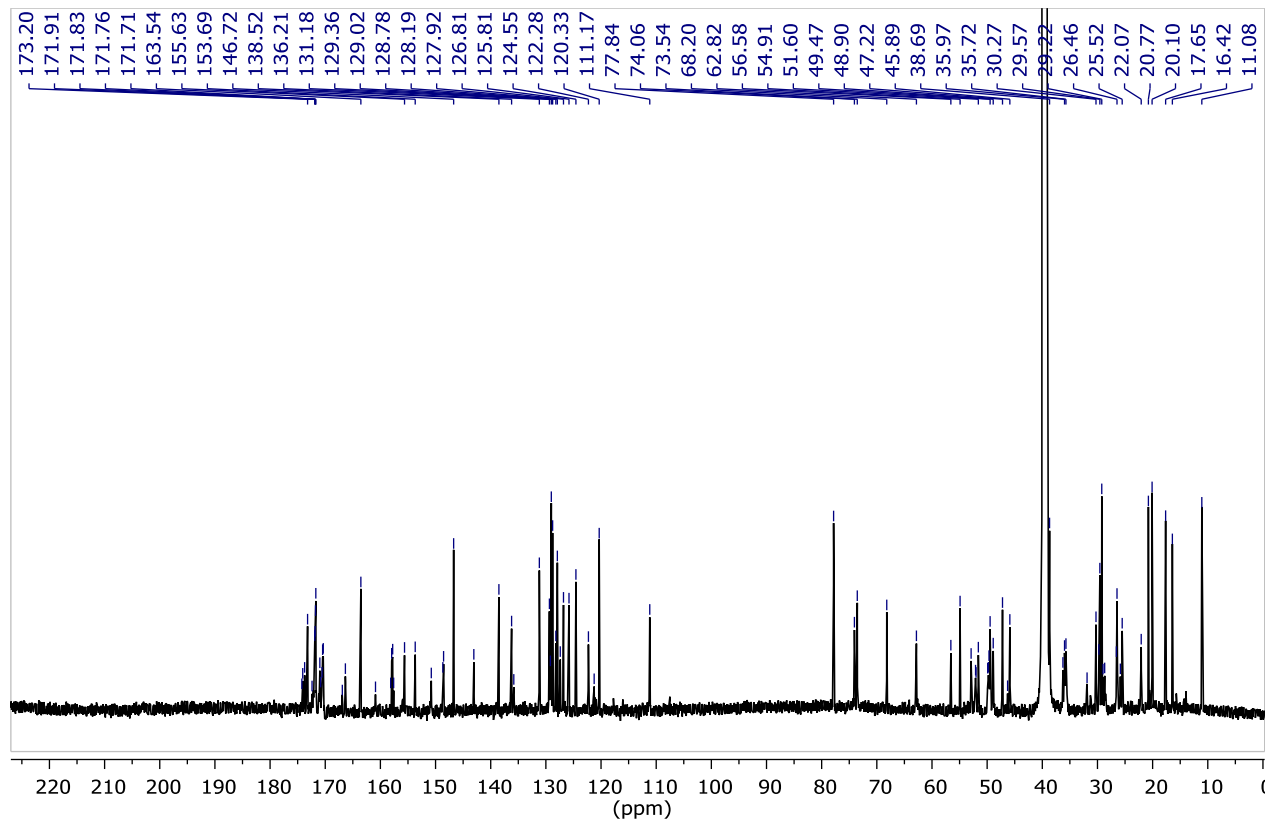

## FA-SS-16R-Aminoratjadone

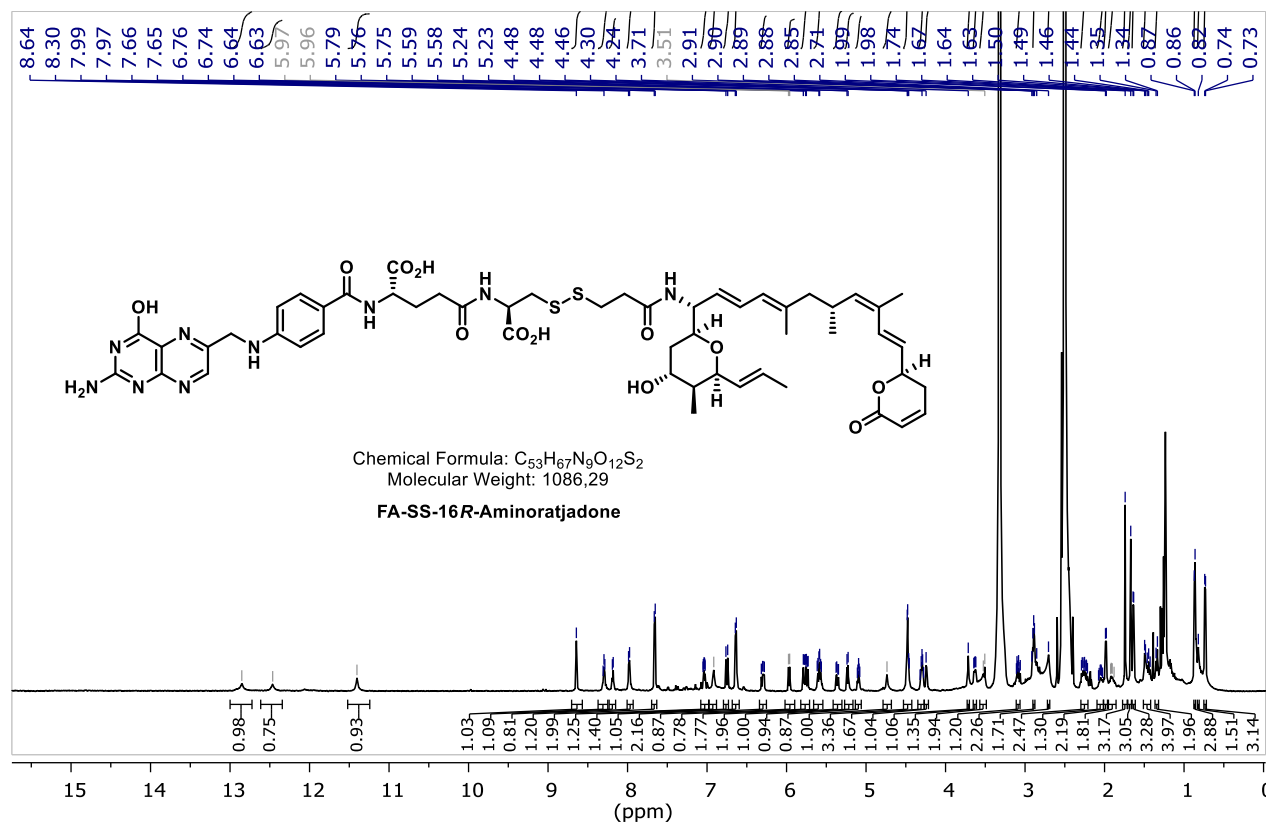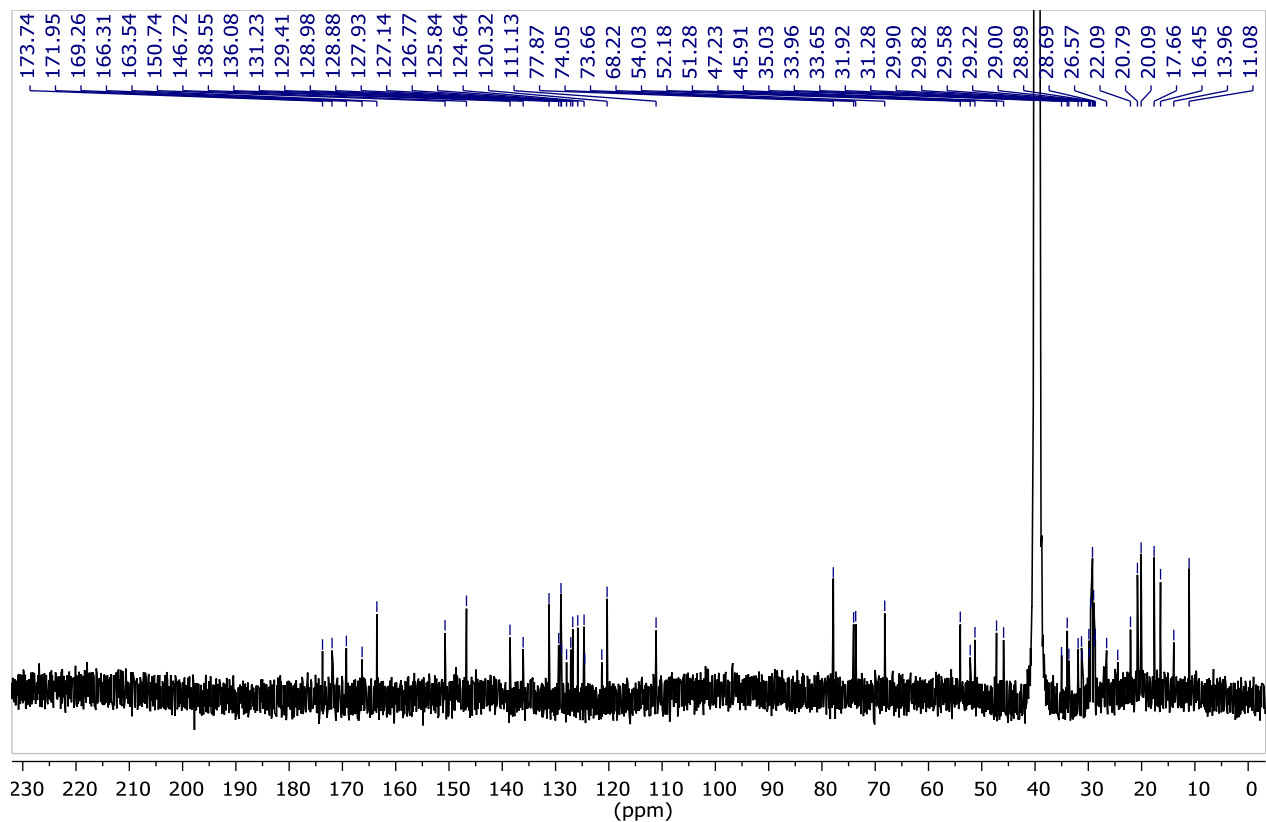

## L-Orn-LHRH-16R-Aminoratjadone

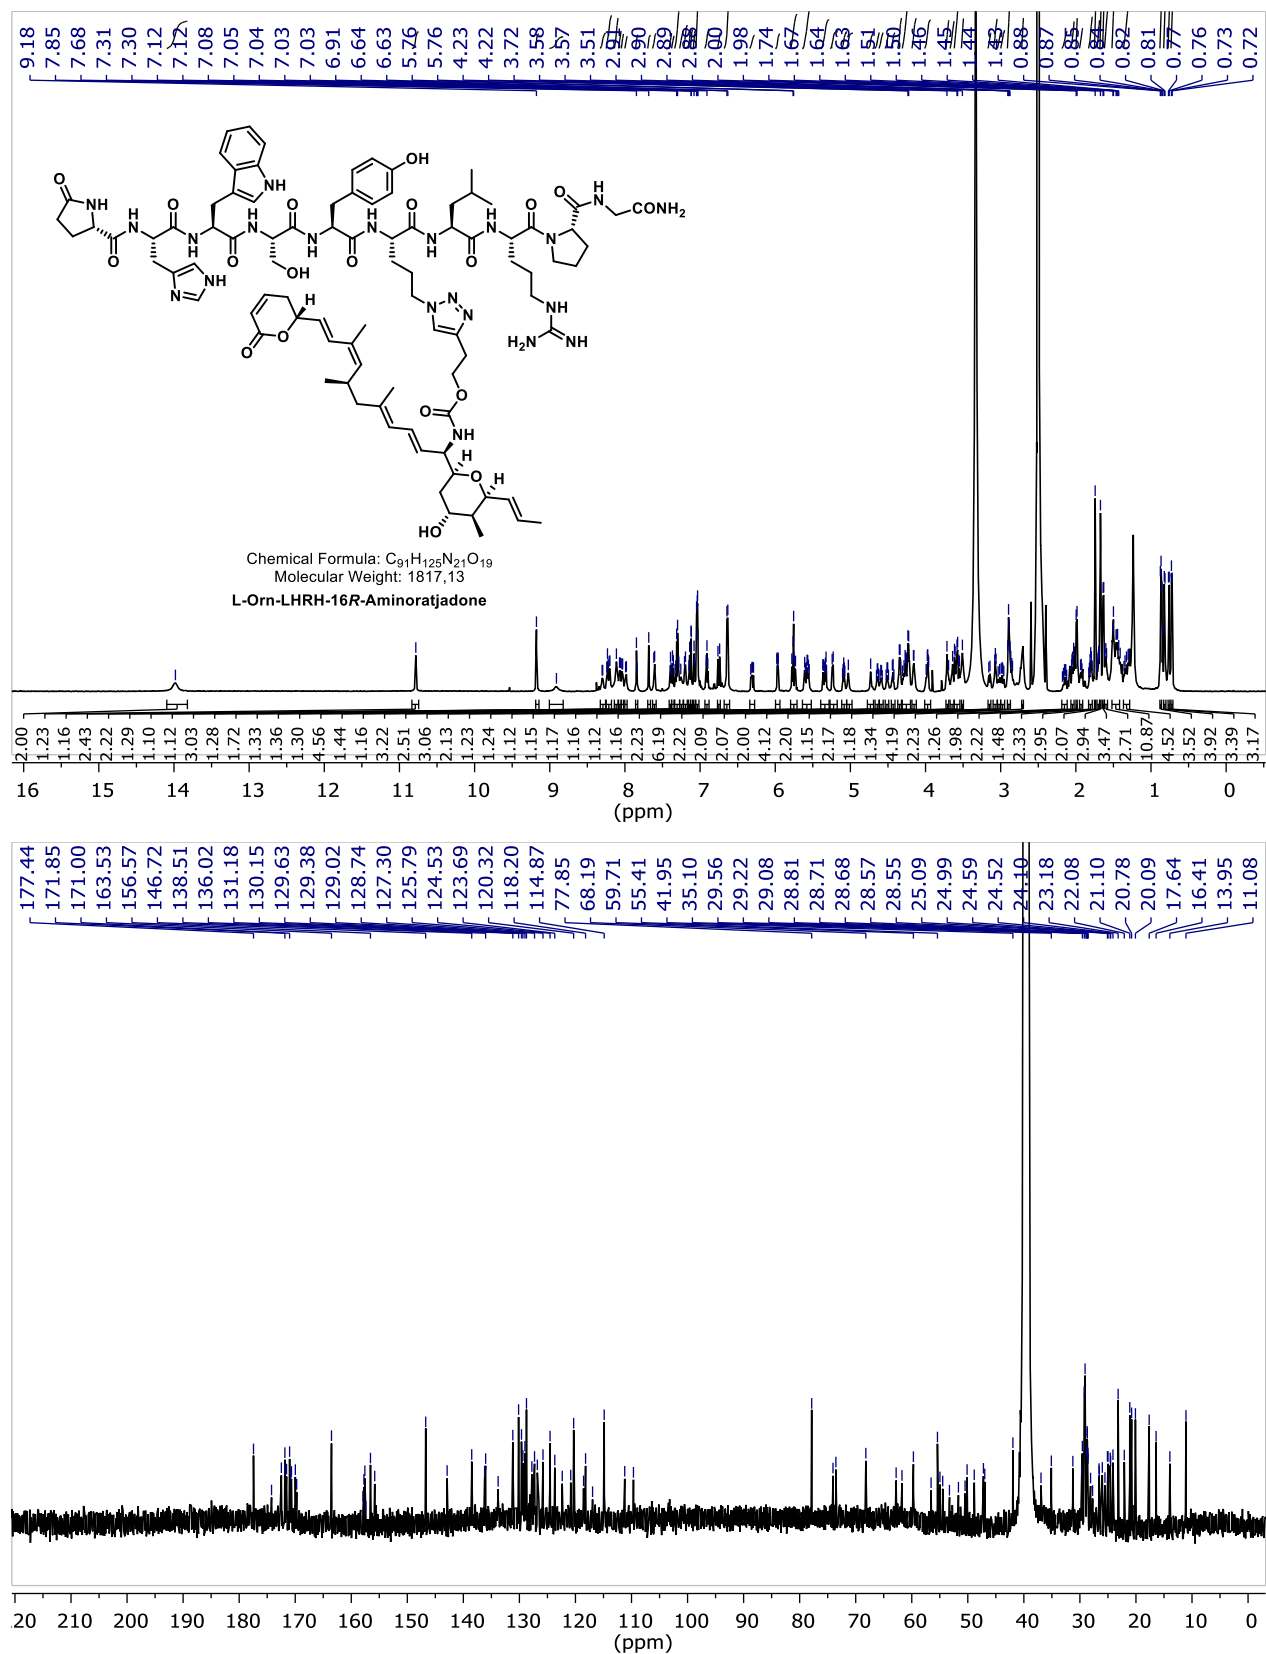

## L-Orn-LHRH-Val-Cit-pABA-16R-Aminoratjadone

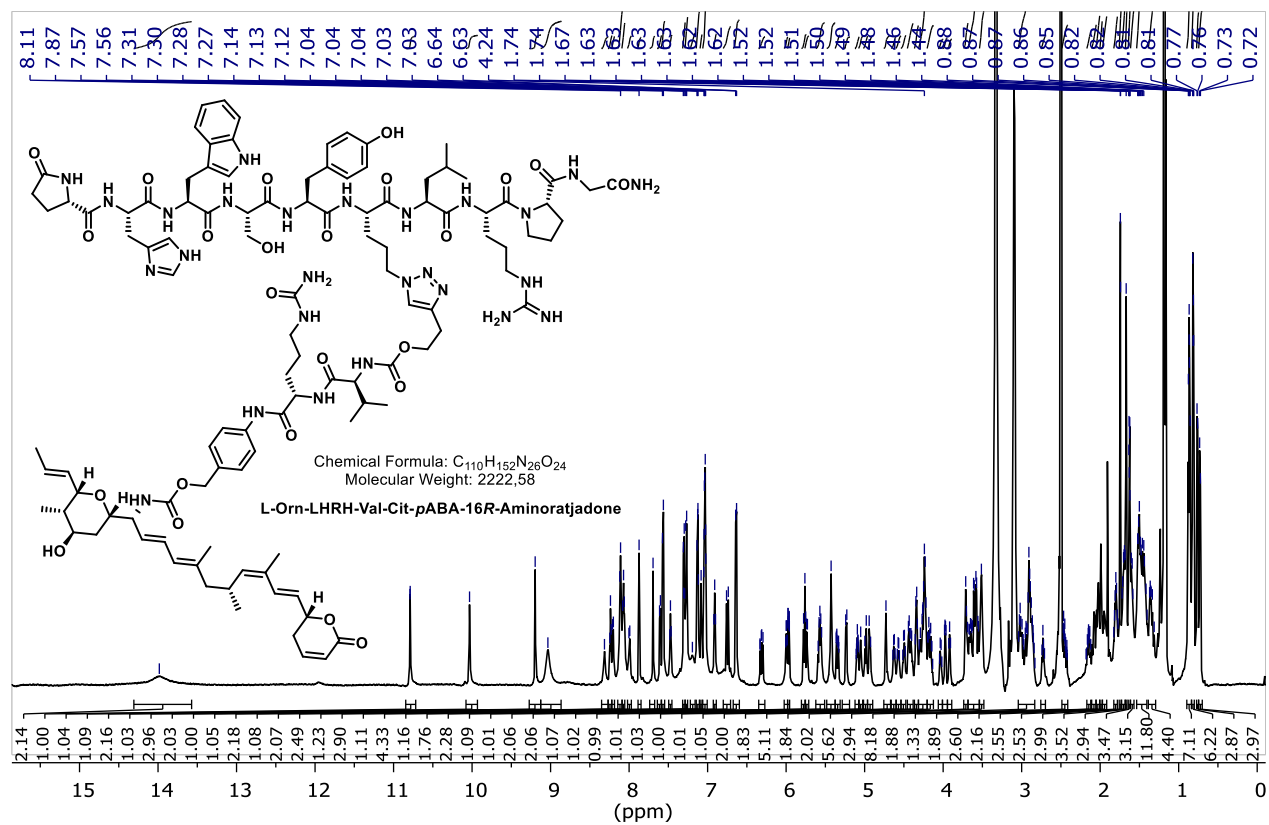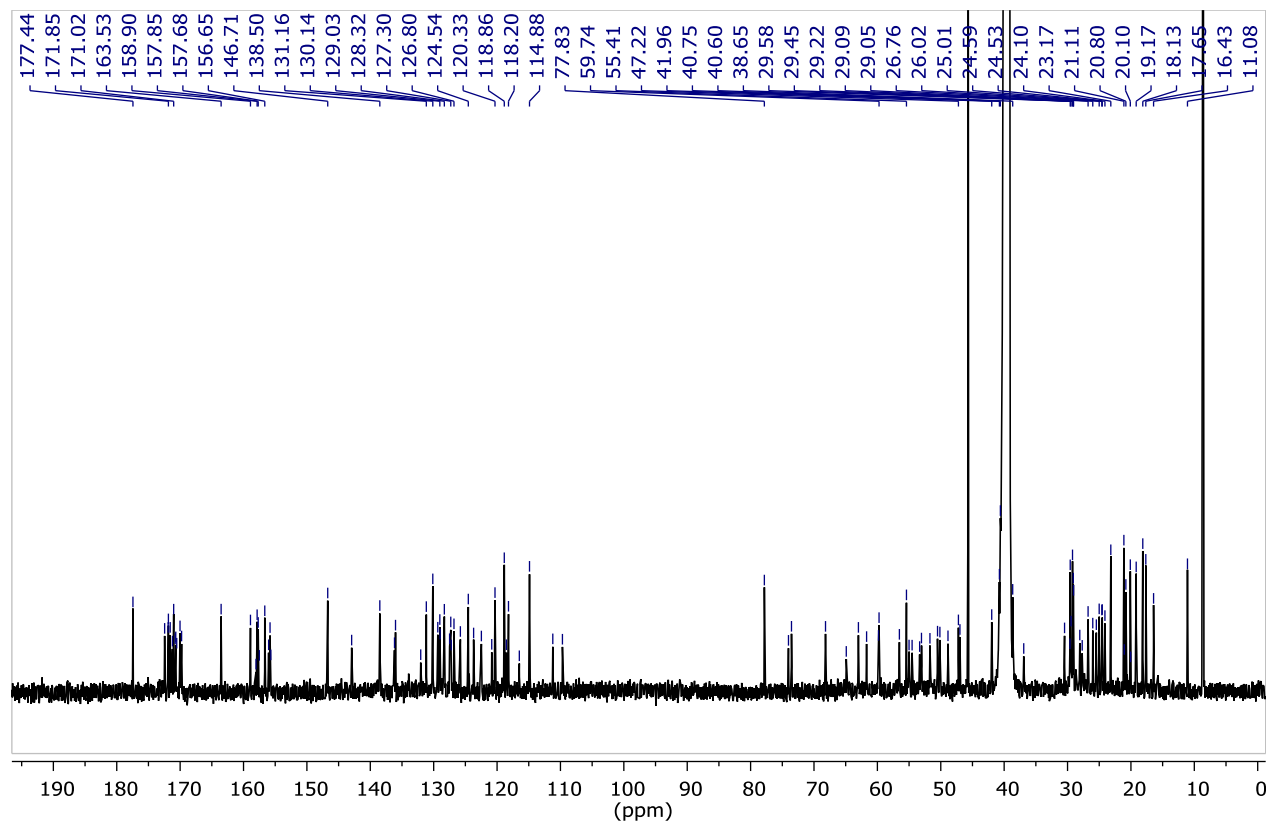

## D-Orn-LHRH-Val-Cit-pABA-16R-Aminoratjadone

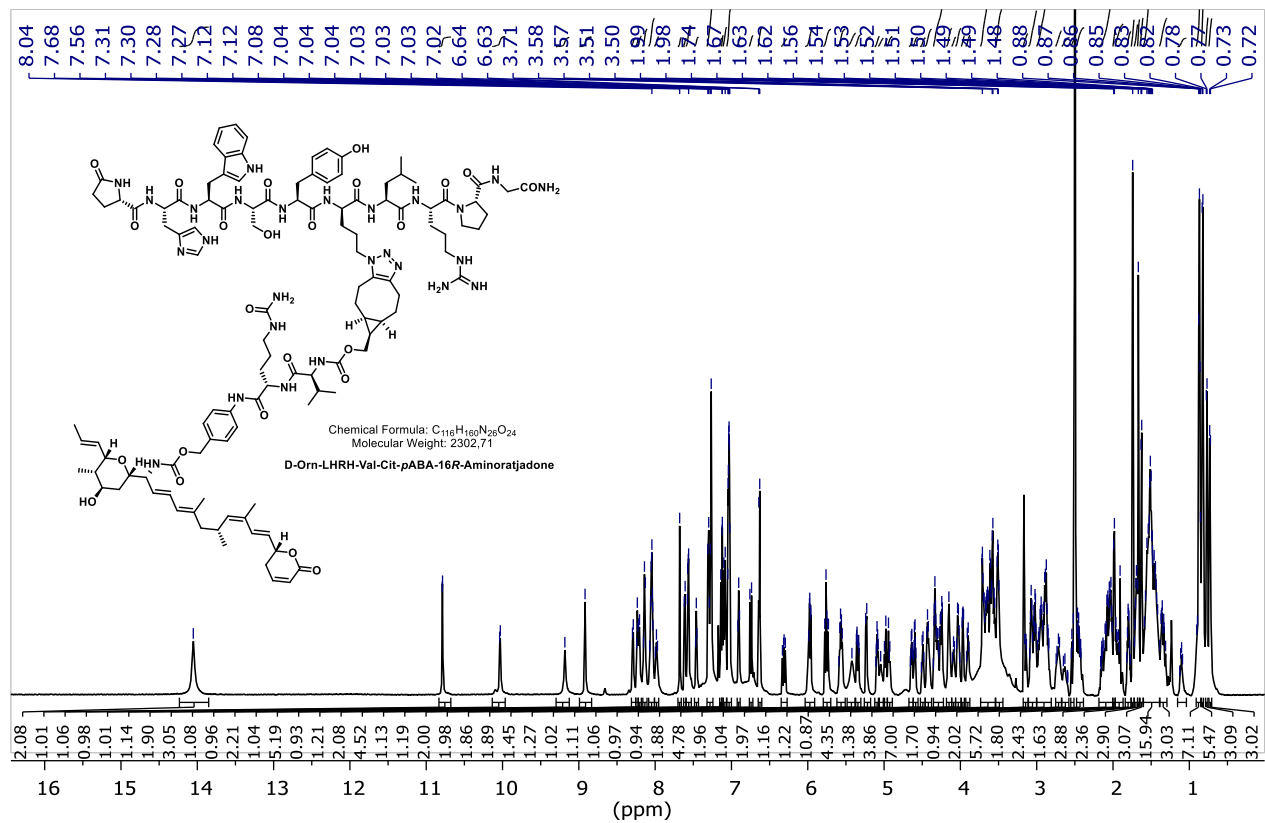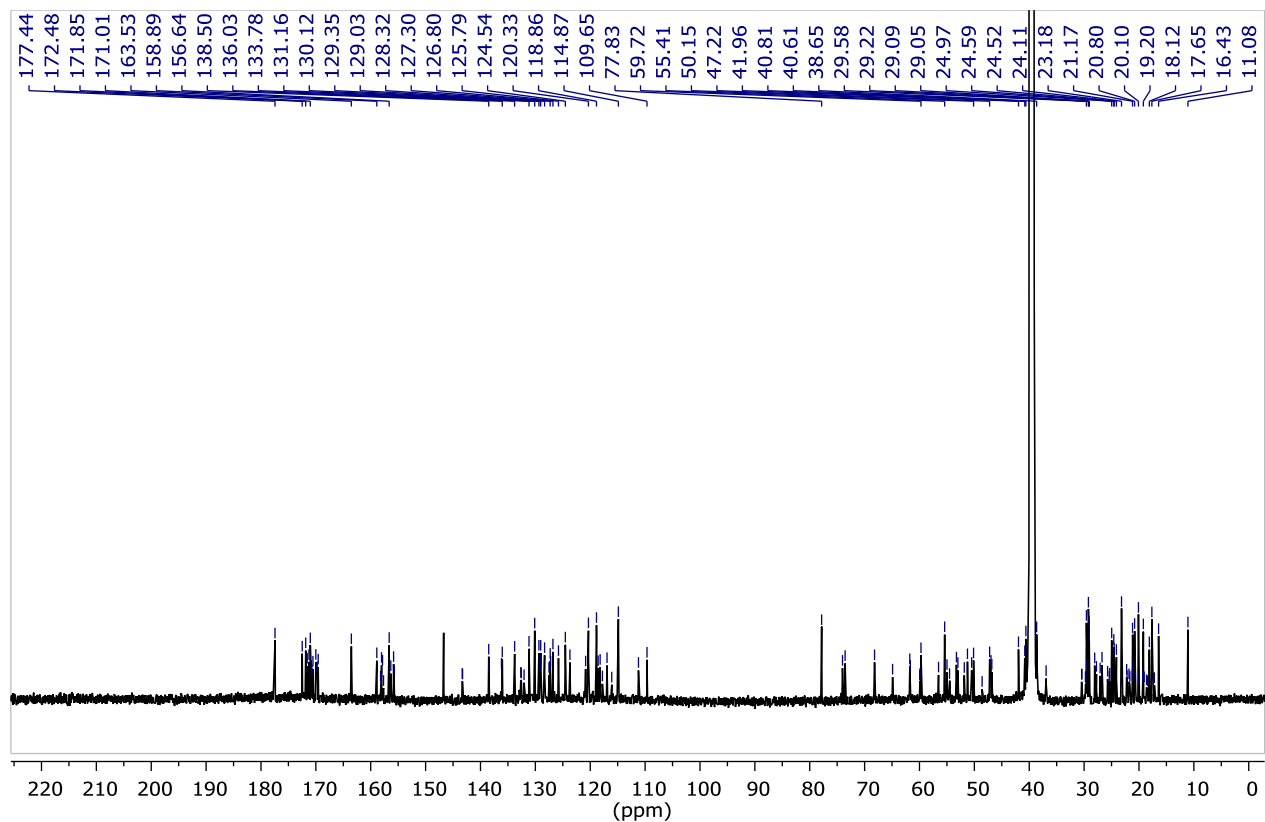

## D-Orn-Goserellin-Val-Cit-pABA-16R-Aminoratjadone

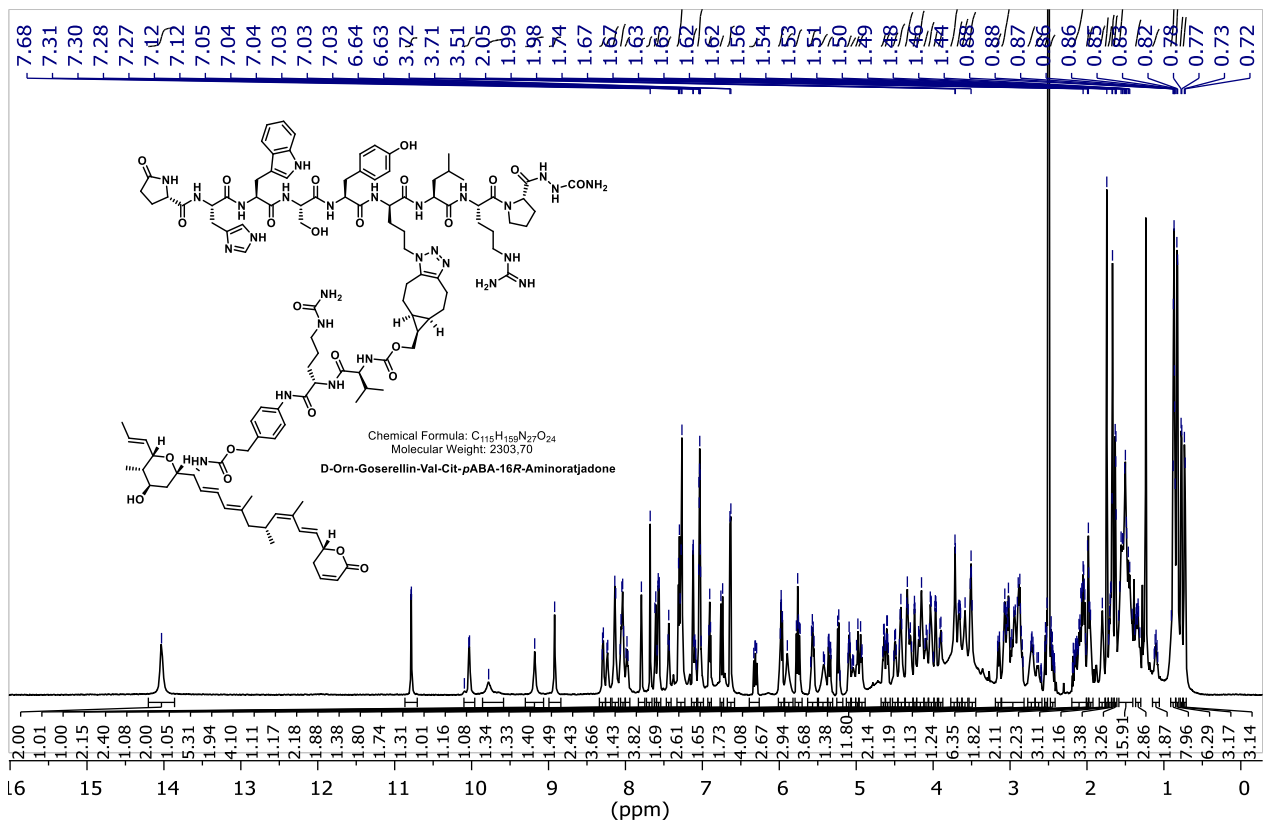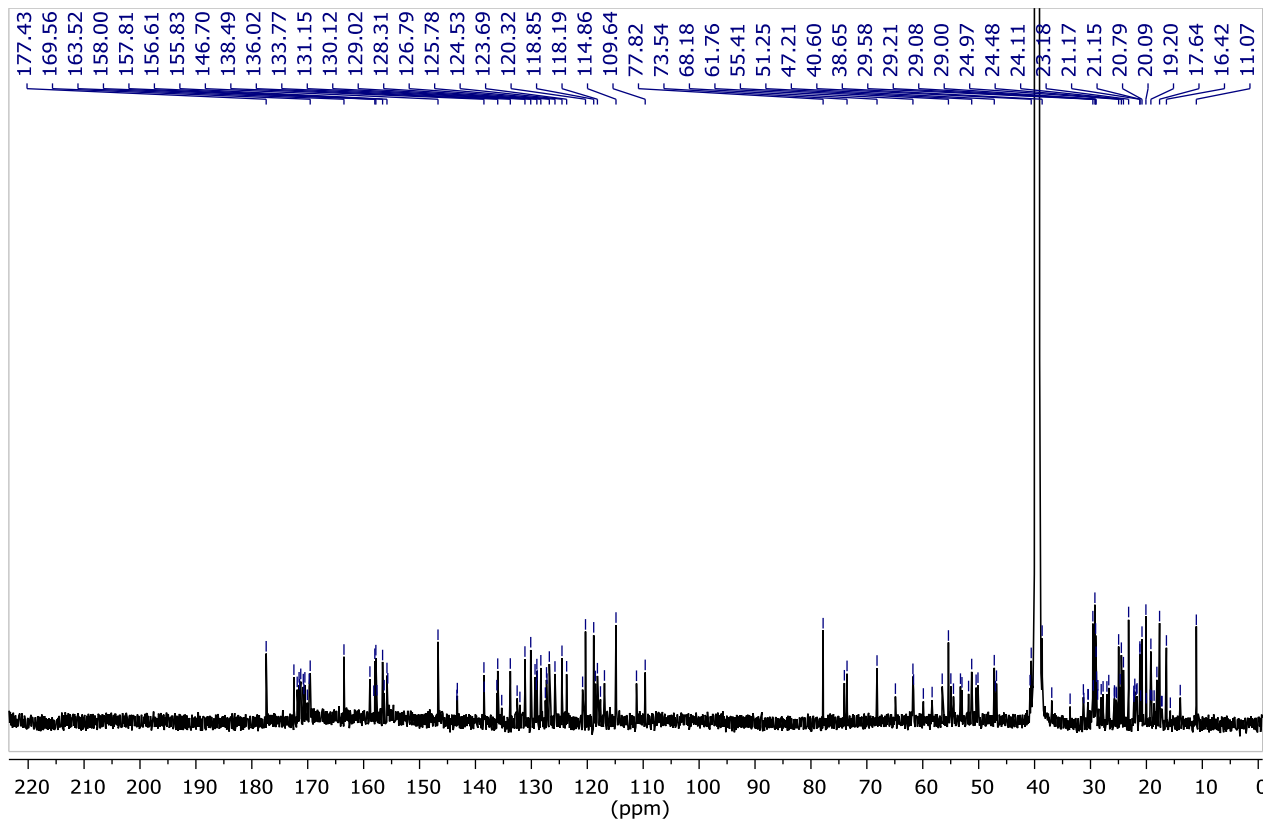

Supplement: SC-010-C8SC05542D-s001.pdf [file SC-010-C8SC05542D-s001.pdf]
